# Supplementary material for: Selective synthesis of functionalized α,β-multi-substituted α-amino cyclopentanones via an α-iminol rearrangement enabled by Pd-catalyzed addition of arylboronic acids to nitriles
Source: Royal Society of Chemistry journal article supplement (doi:10.1039/d2qo01488b), 2022-01-01
Supplement: d2qo01488b1.pdf [file d2qo01488b1.pdf]

## VIII. $^1\text{H}$ and $^{13}\text{C}$ NMR Spectral Copies

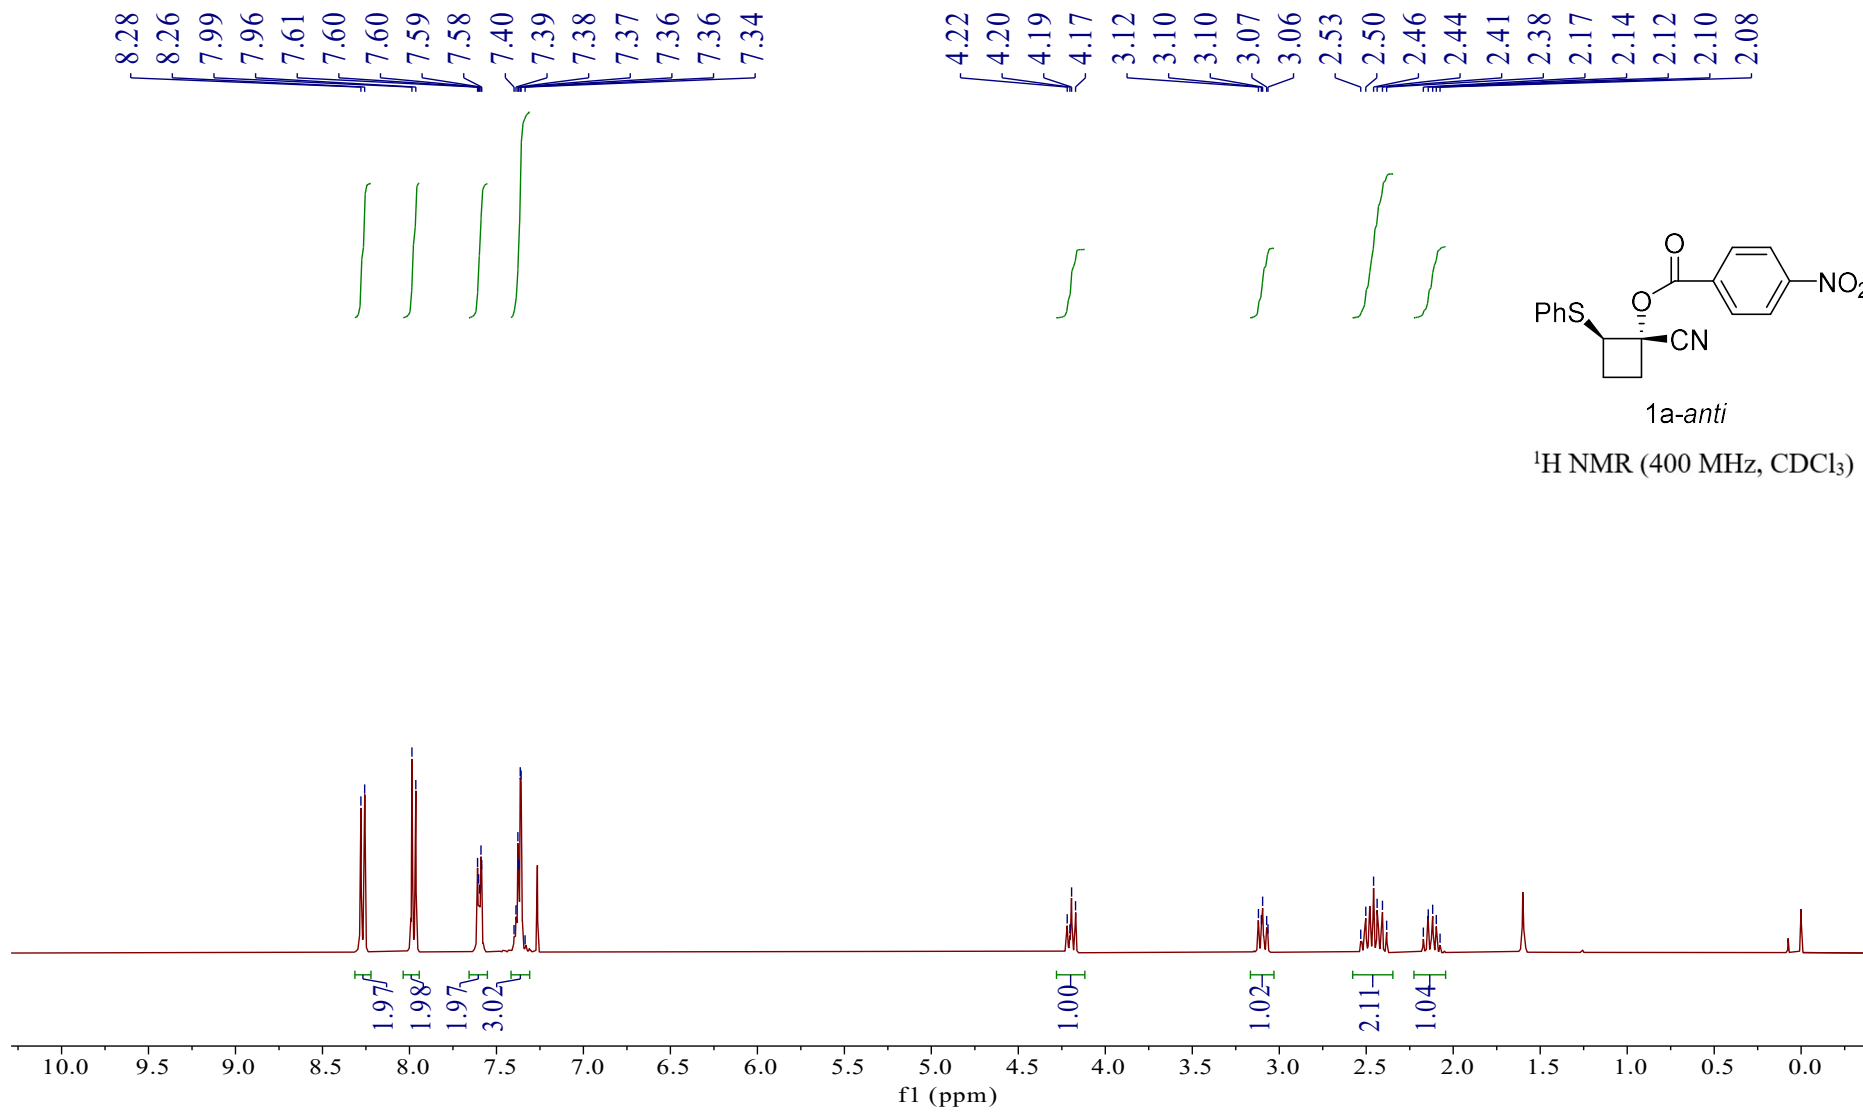

NMR-2

- 162.2

- 151.2

133.6

133.5

132.8

131.1

129.4

128.2

123.8

115.8

50.7  
50.7

- 33.2

- 22.2

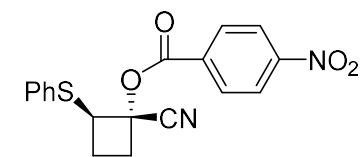

1a-anti

<sup>13</sup>C NMR (125 MHz, CDCl<sub>3</sub>)

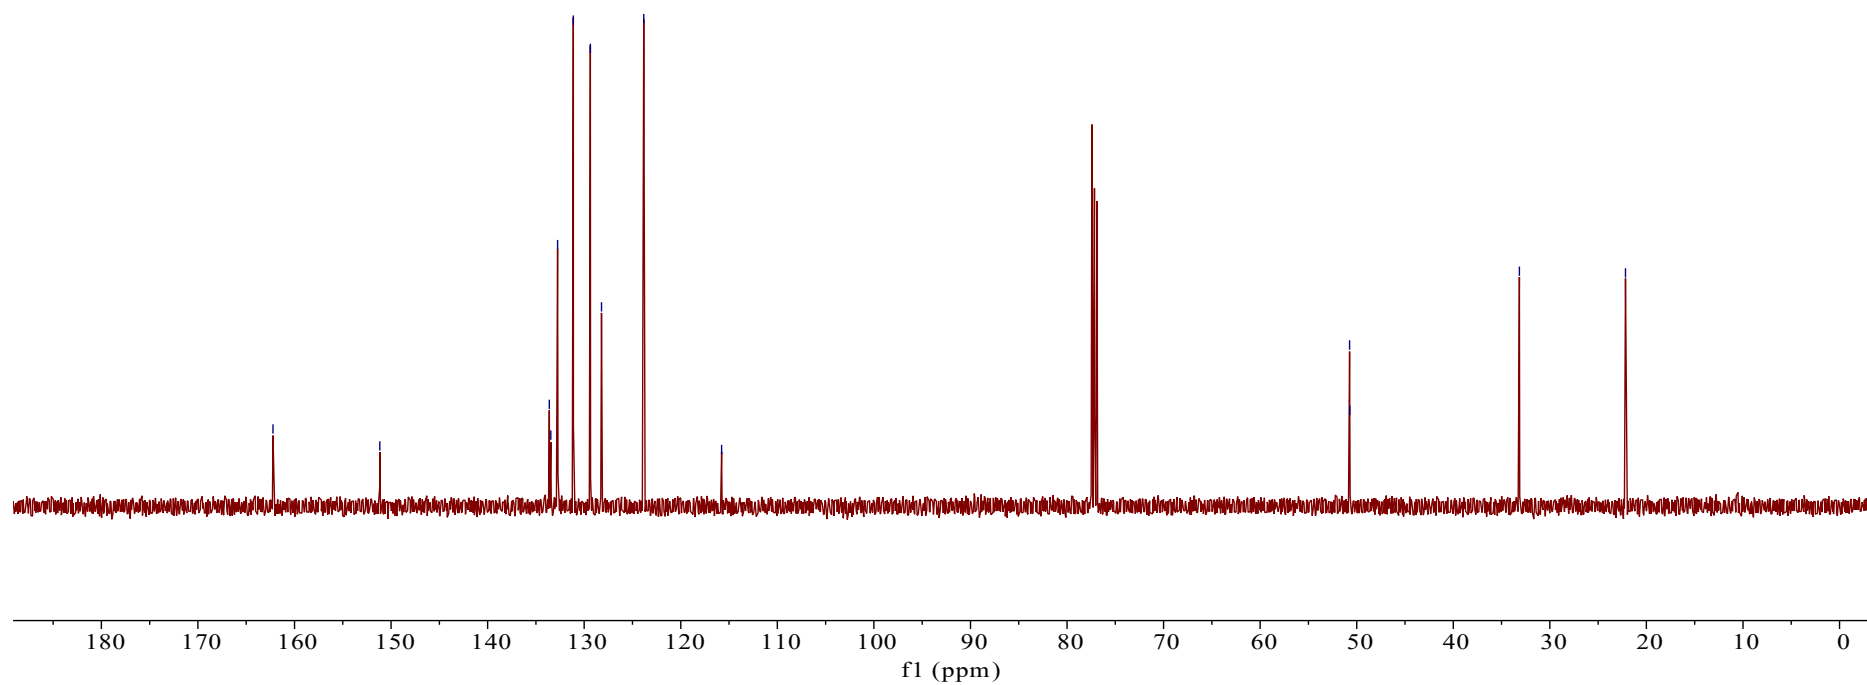

NMR-3

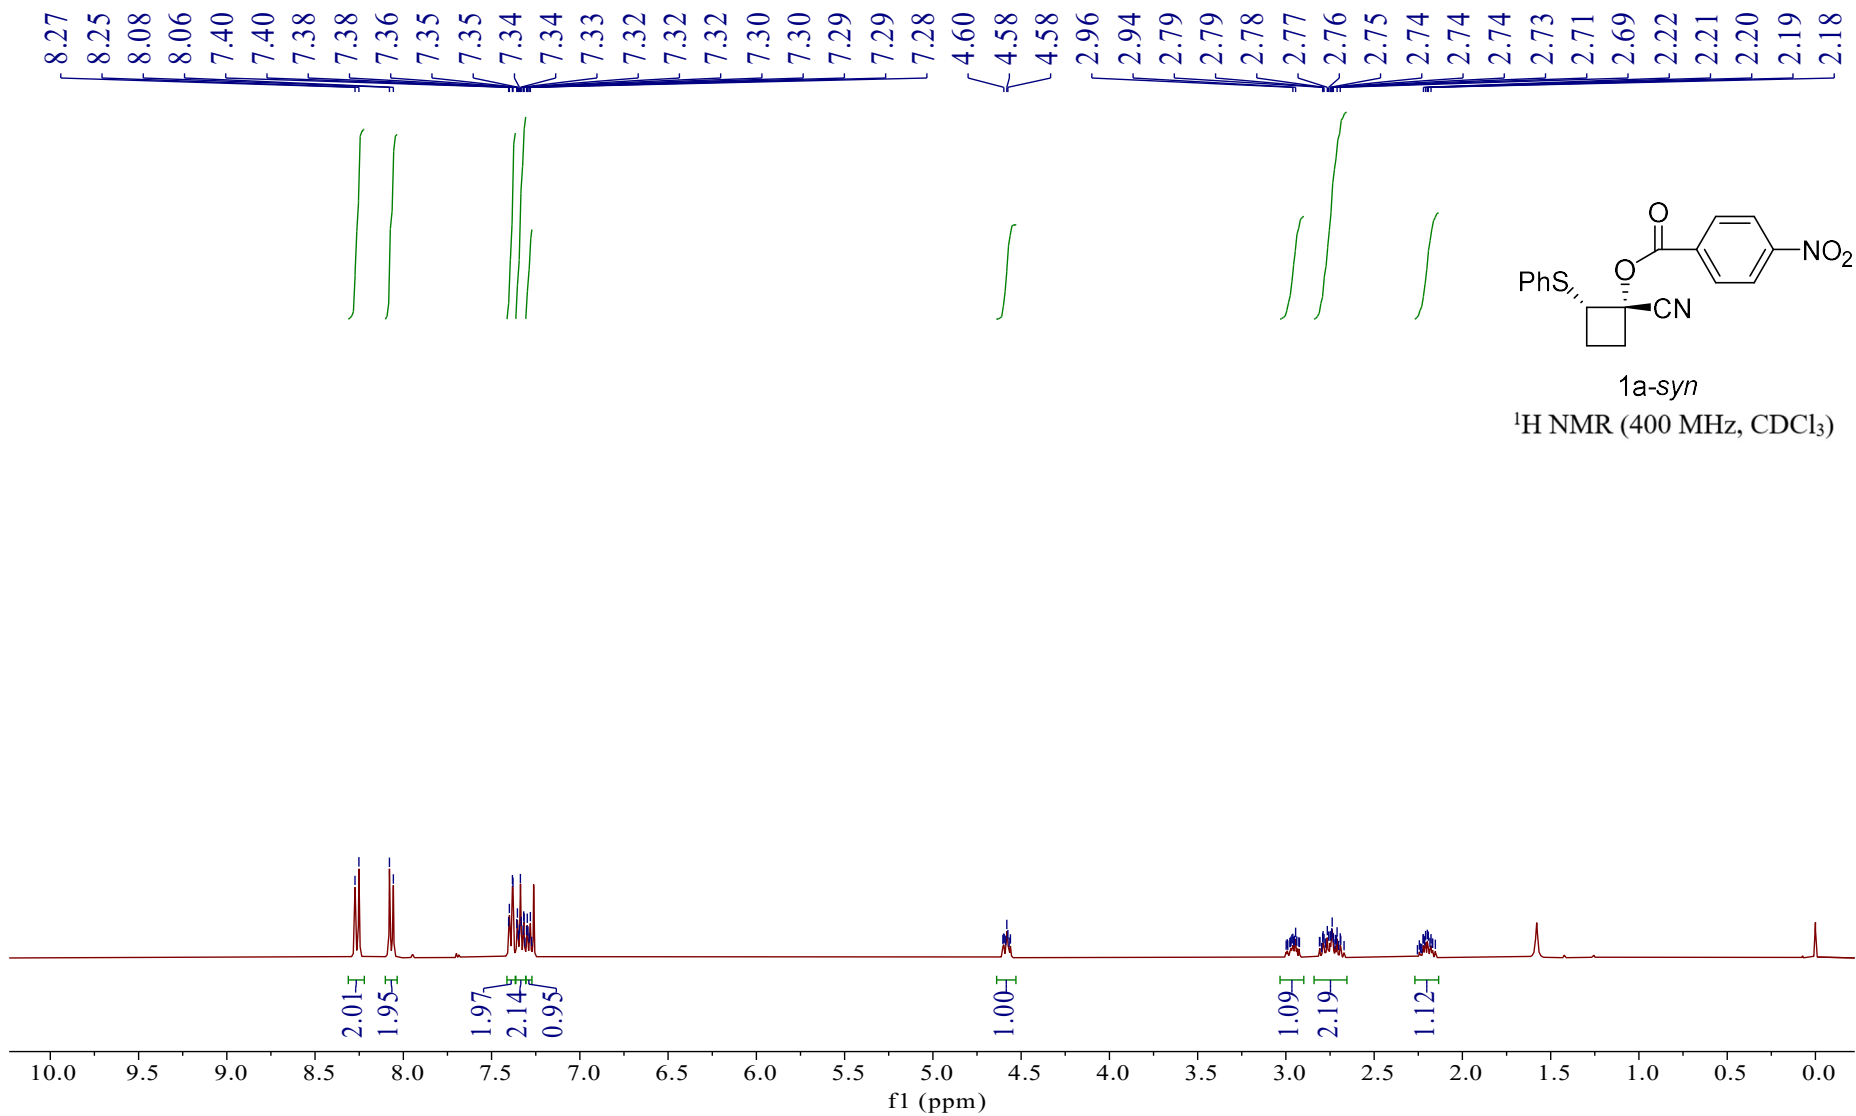

NMR-4



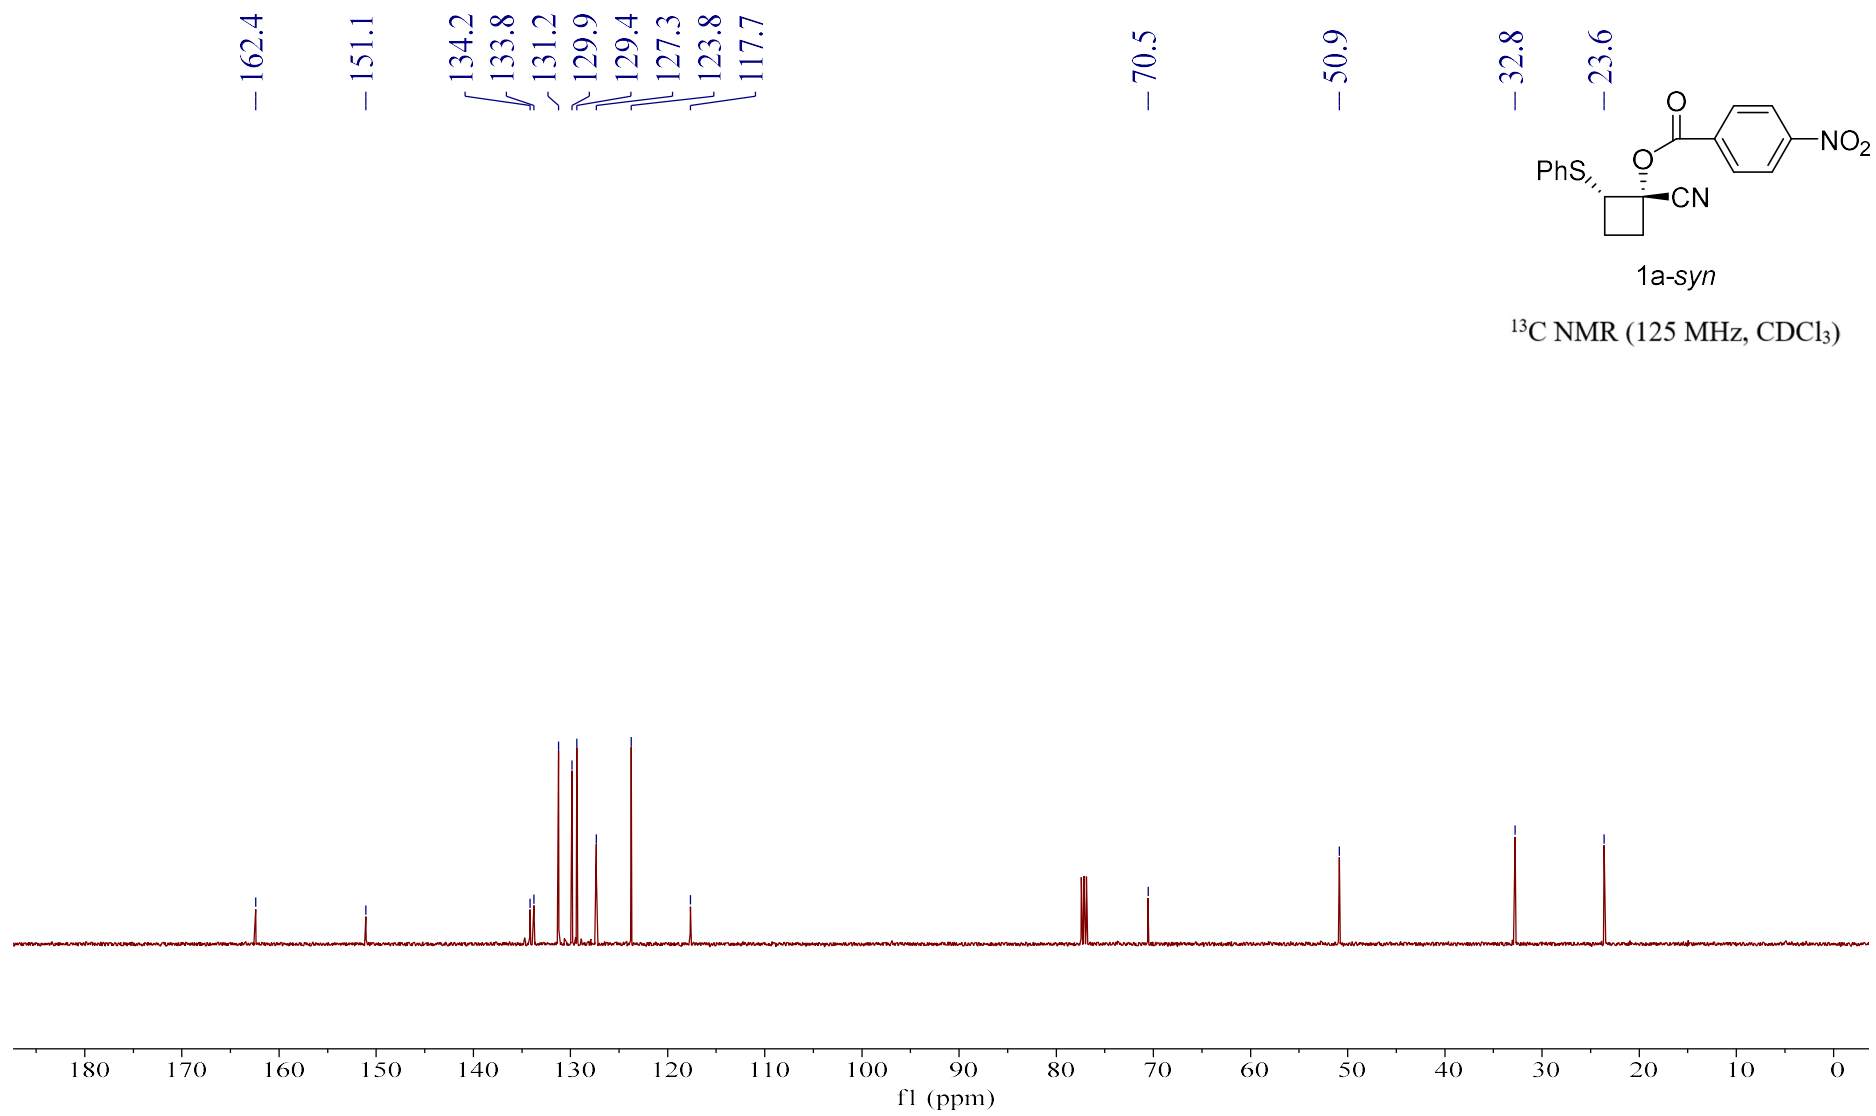

NMR-5

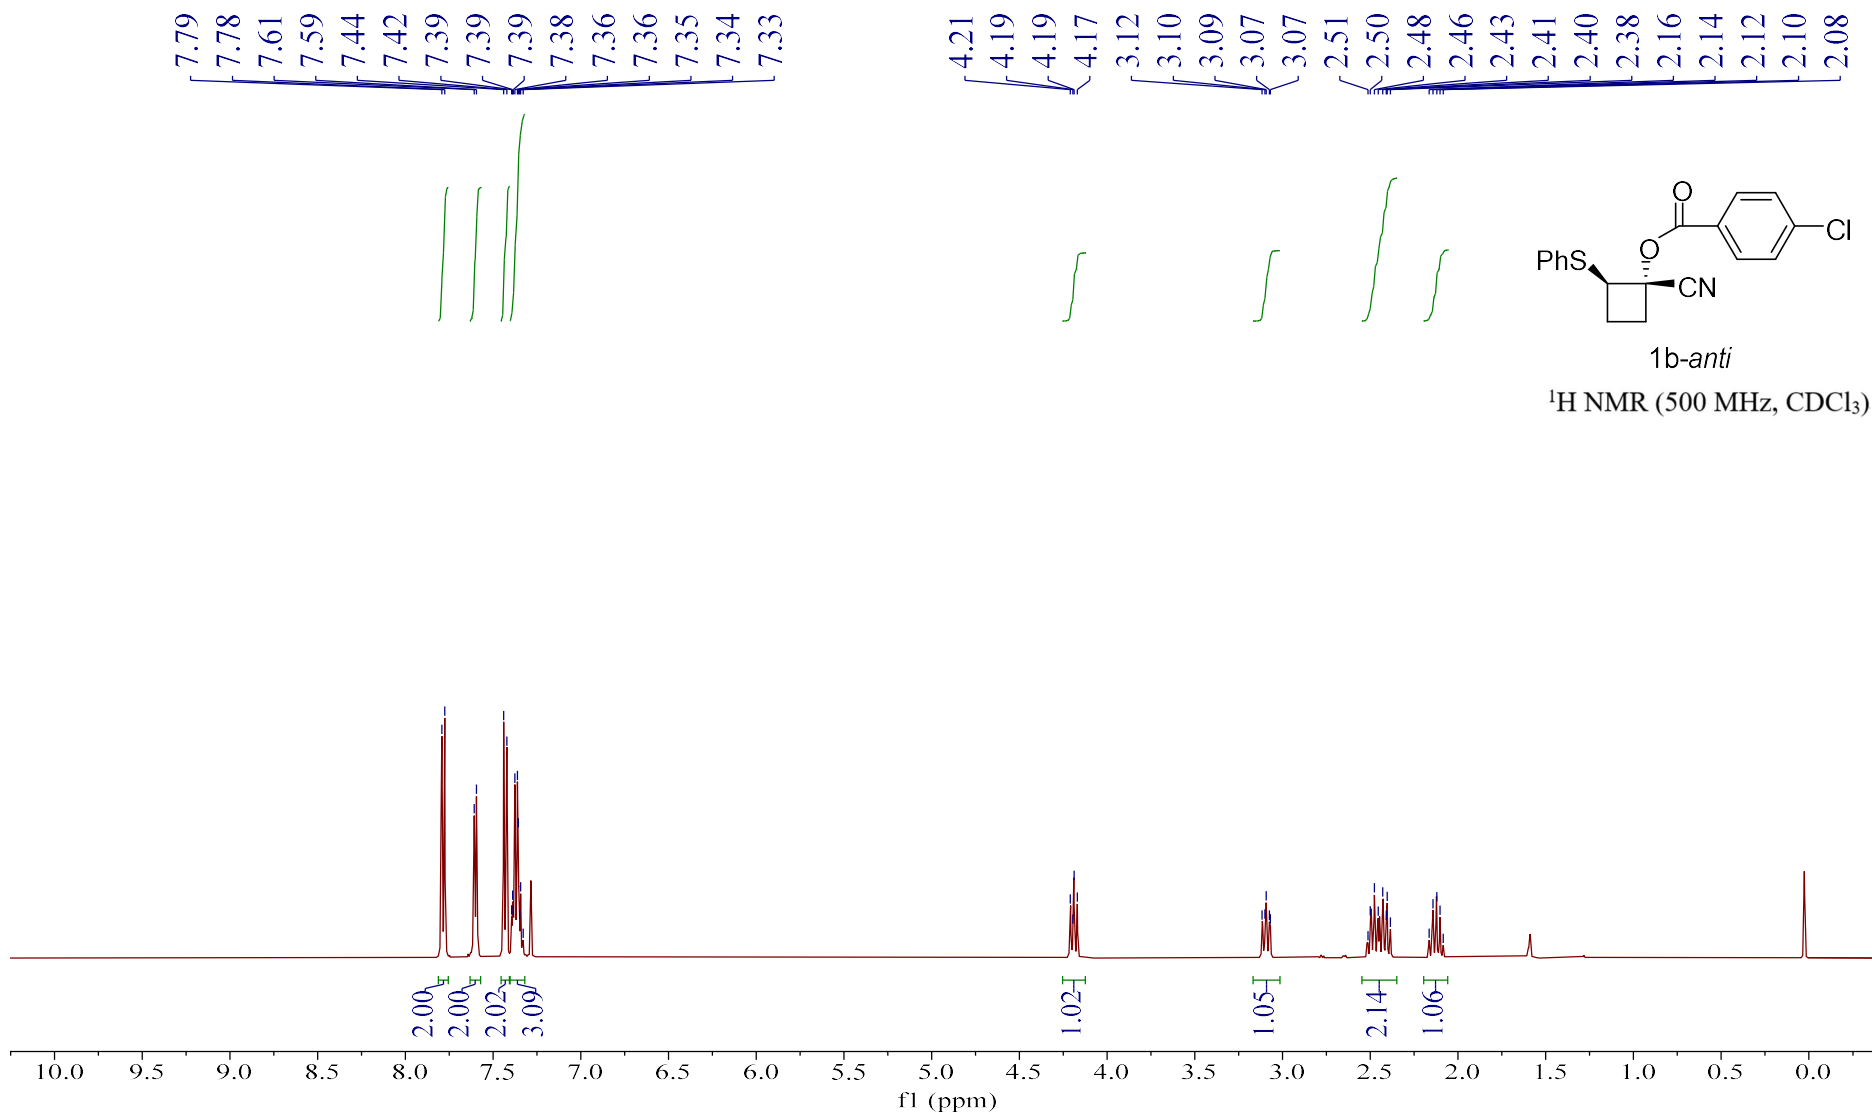

NMR-6

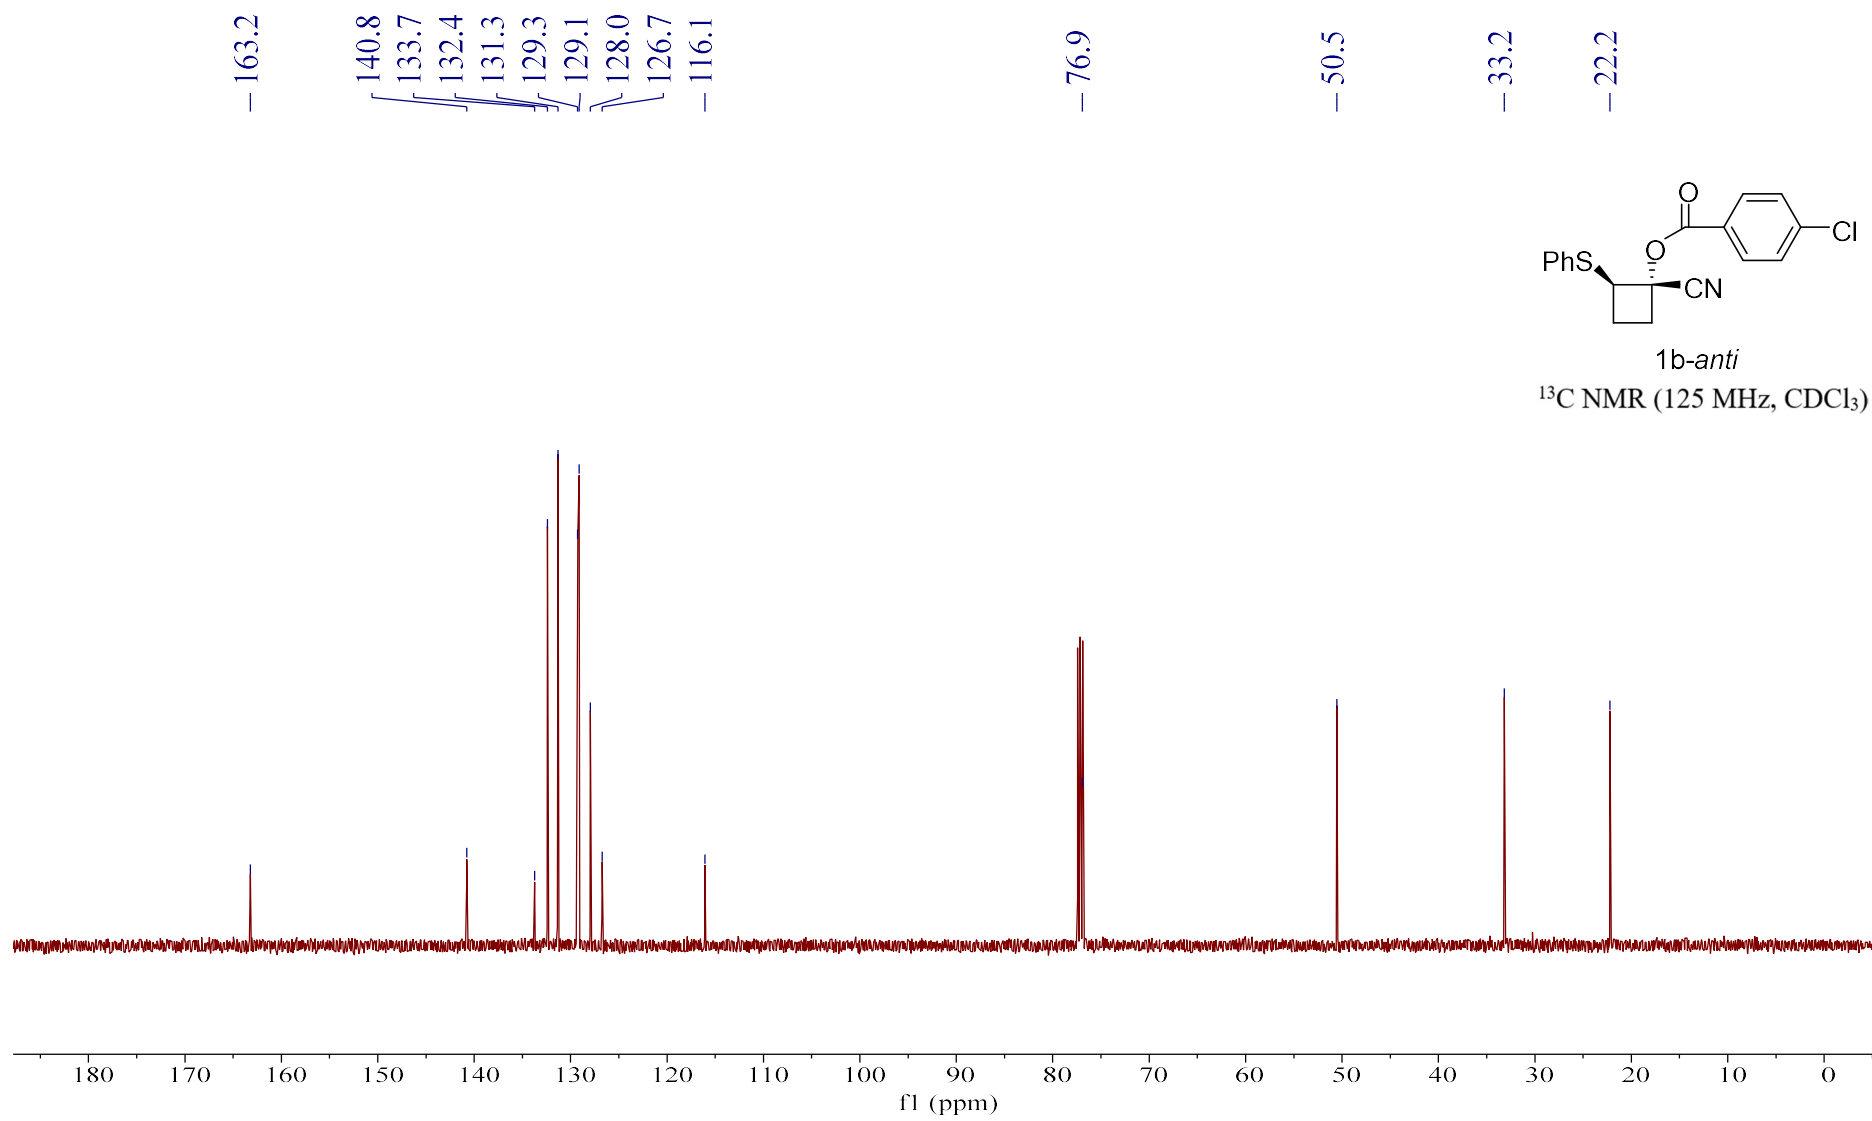

NMR-7

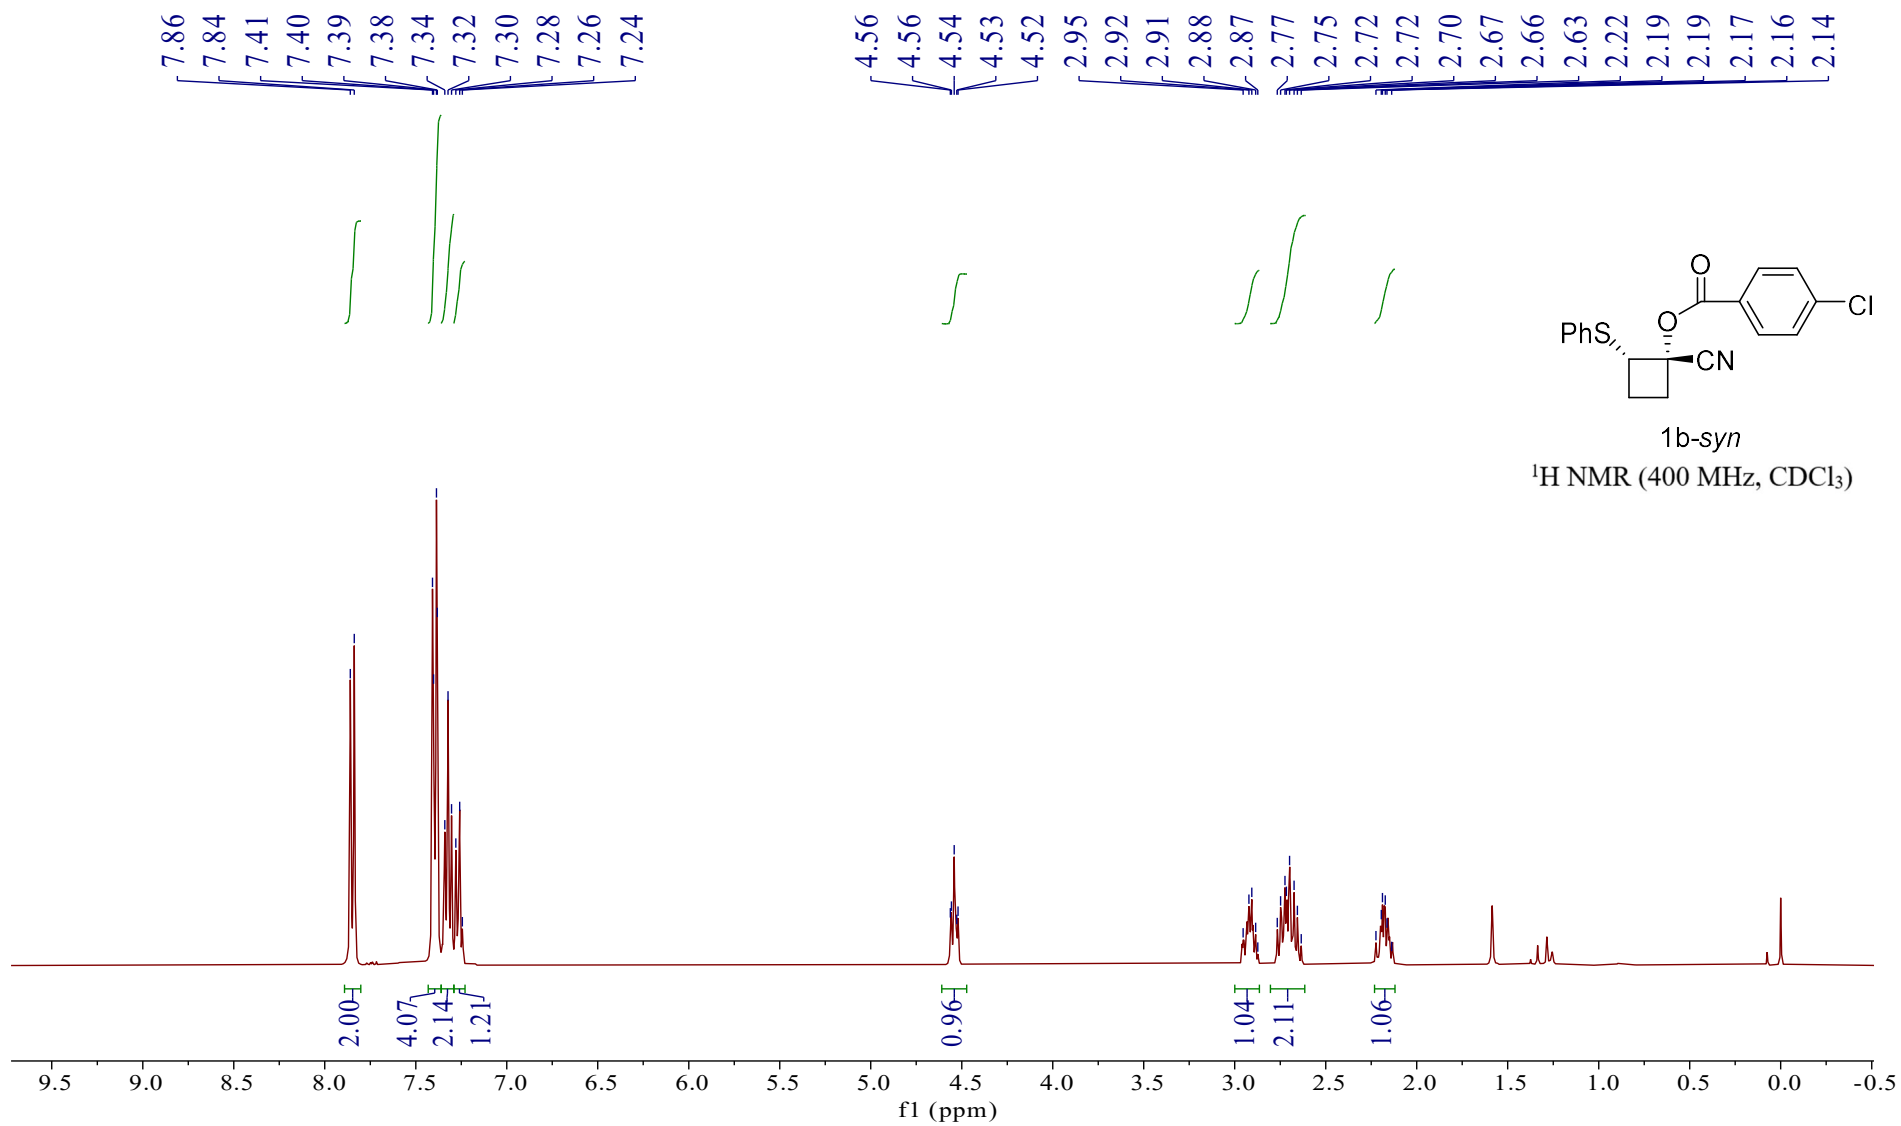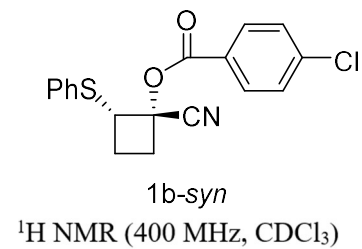

NMR-8

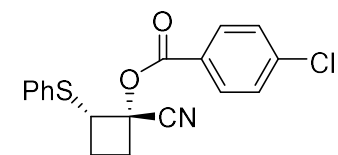

1b-syn

$^{13}\text{C}$  NMR (125 MHz,  $\text{CDCl}_3$ )

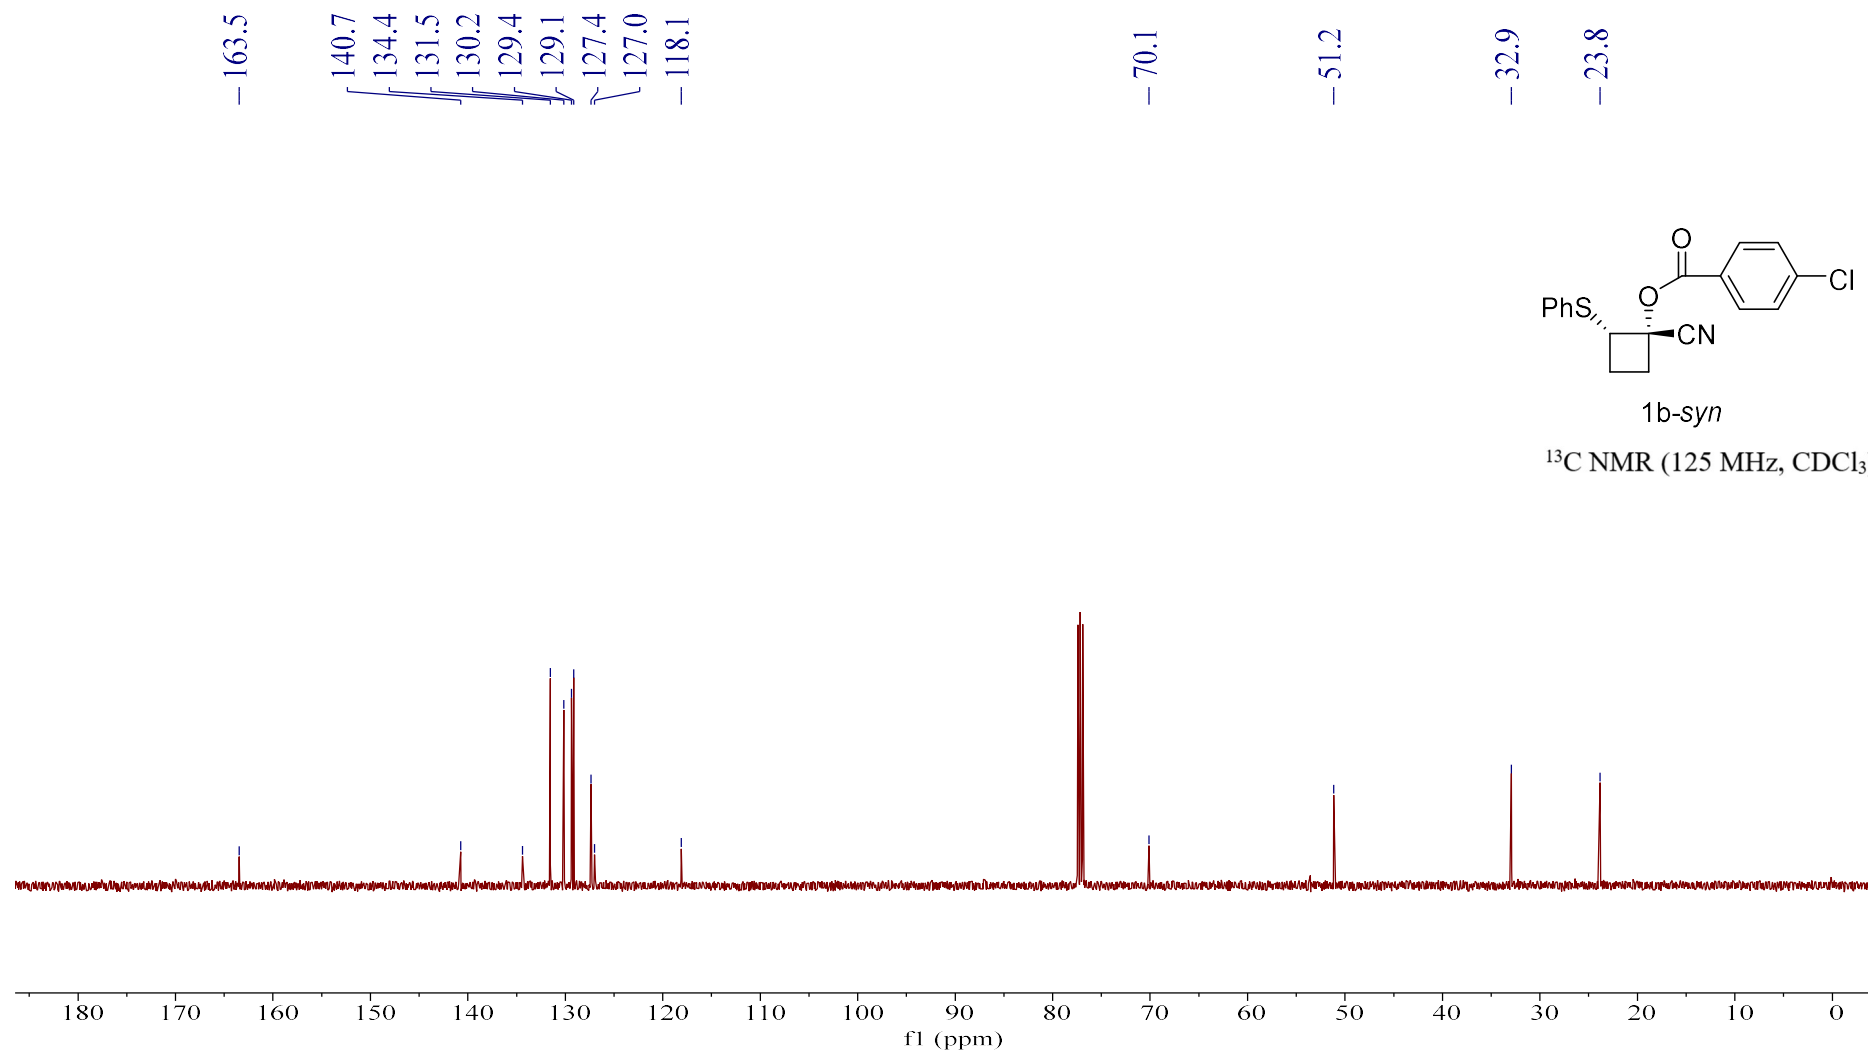

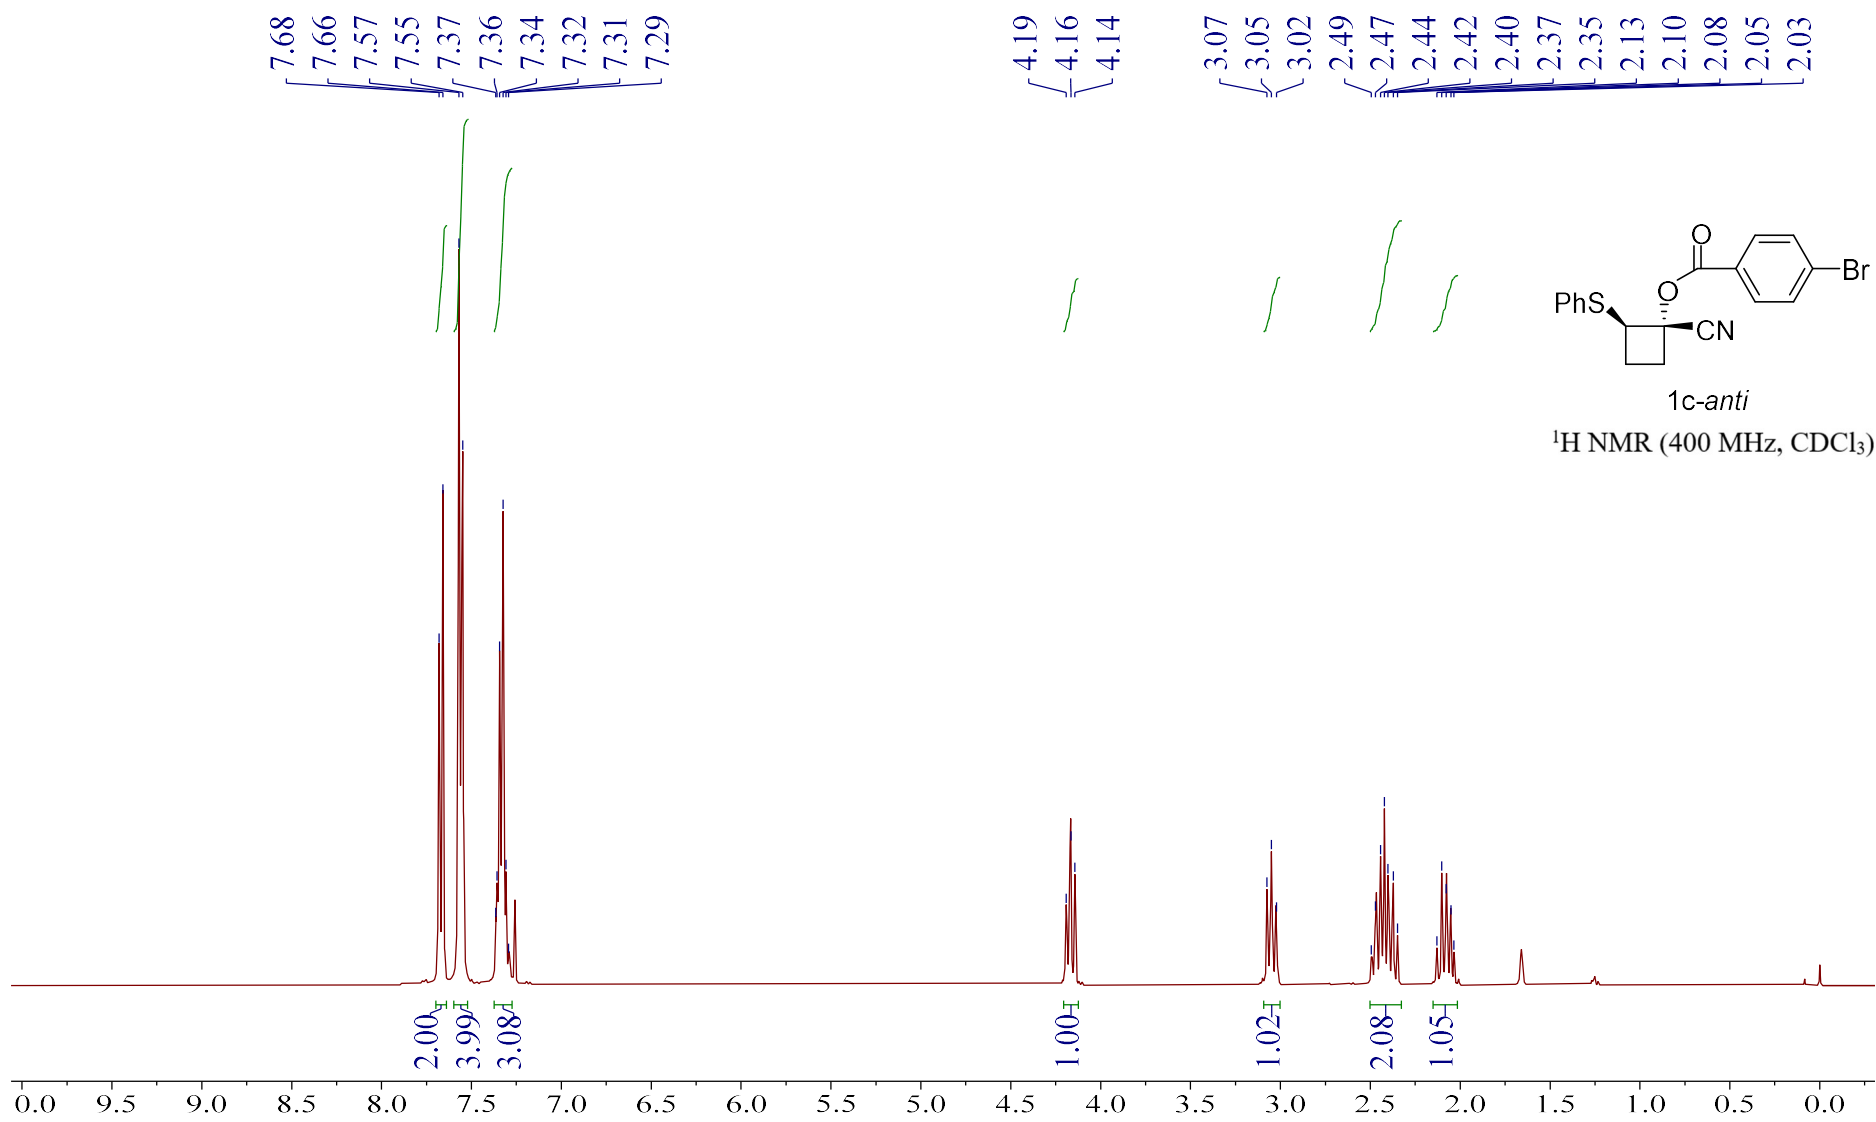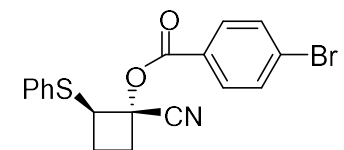

1c-anti

<sup>1</sup>H NMR (400 MHz, CDCl<sub>3</sub>)

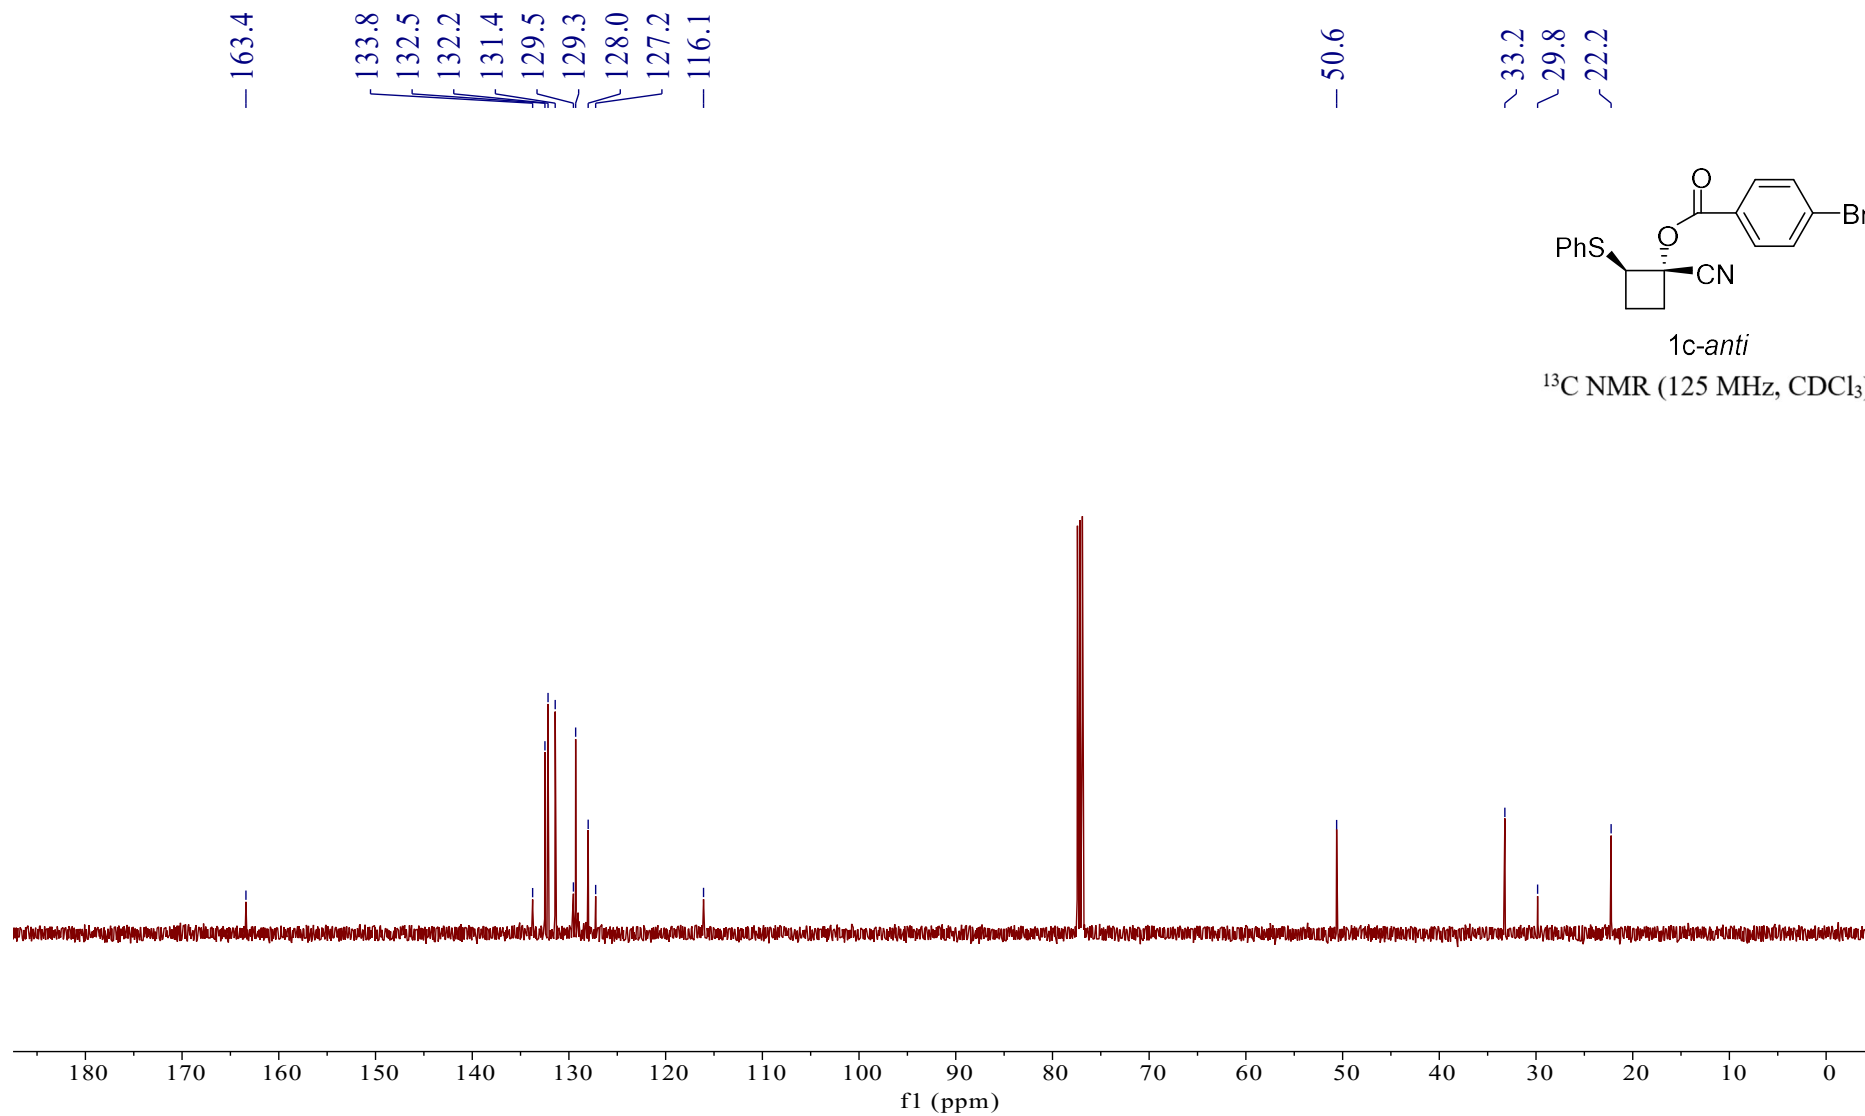

NMR-11

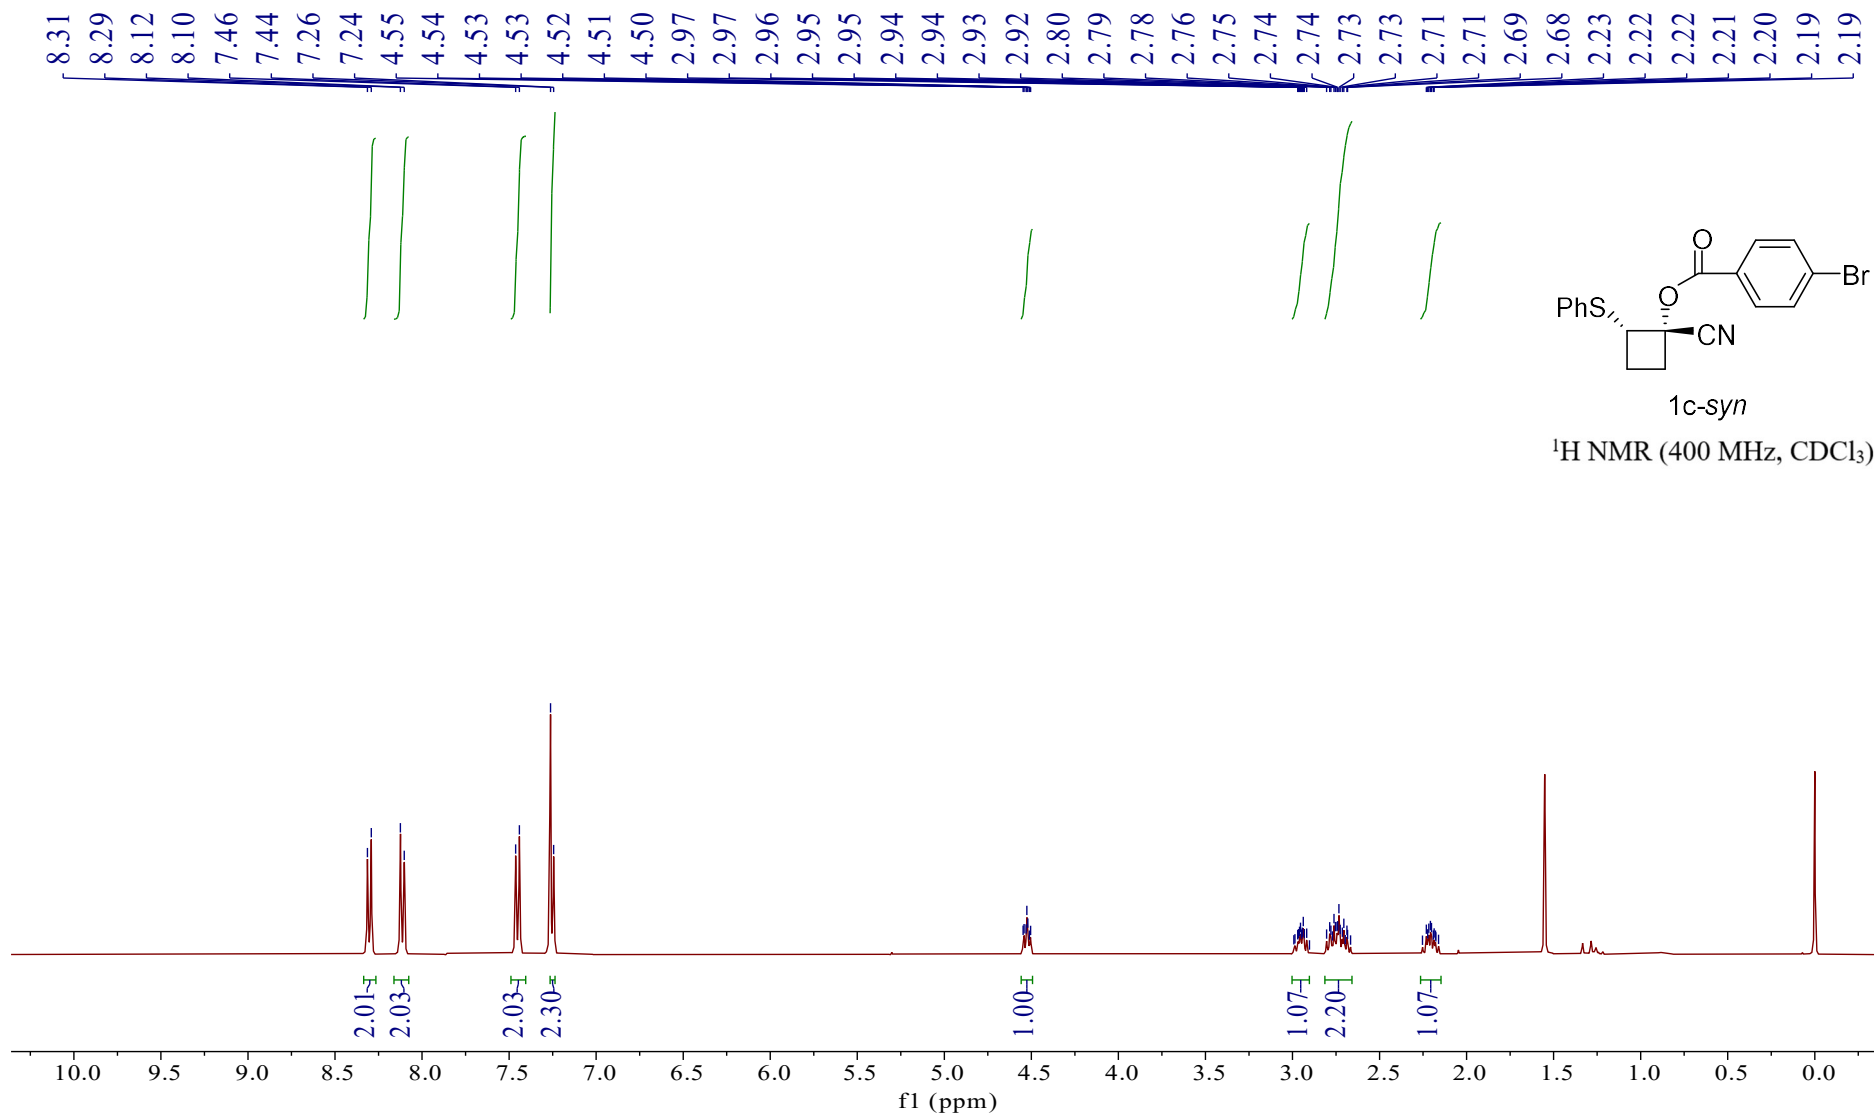

NMR-12



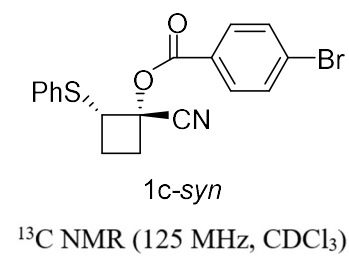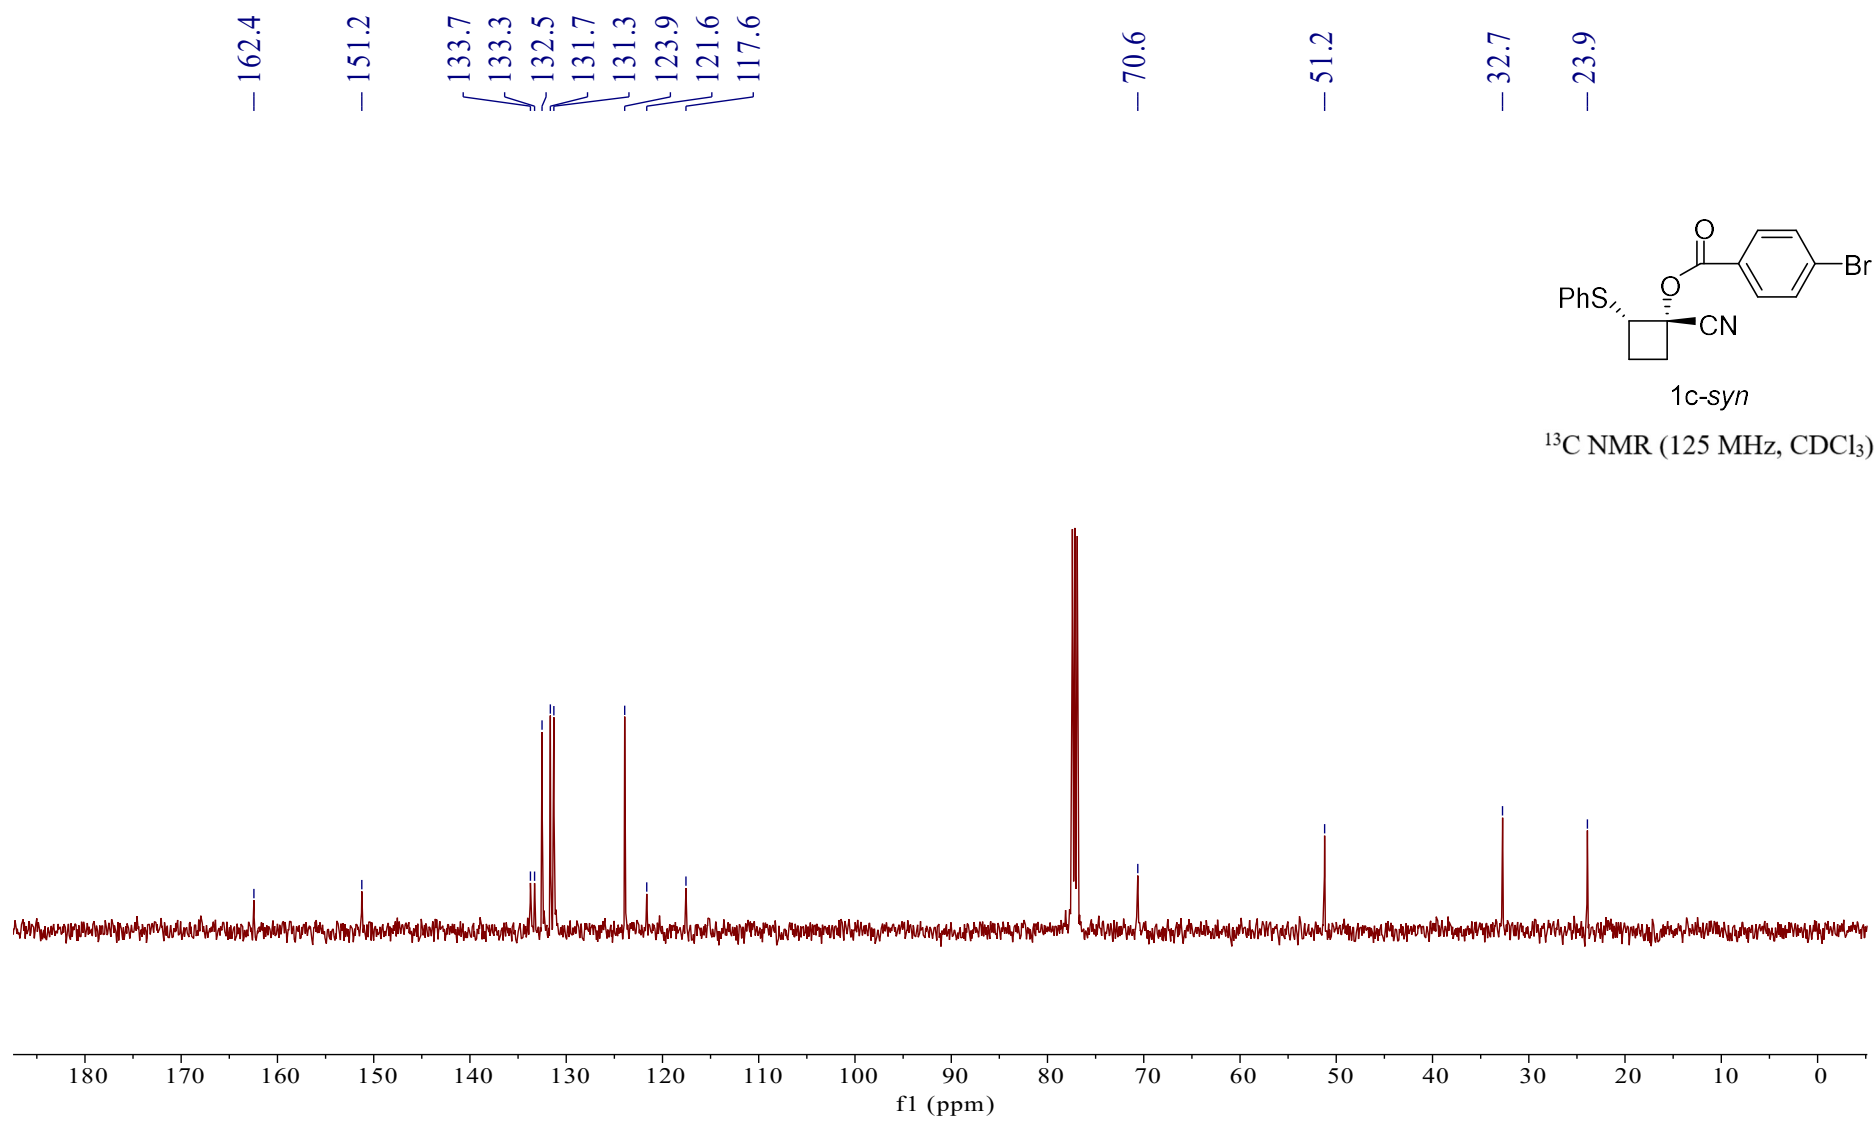

NMR-13

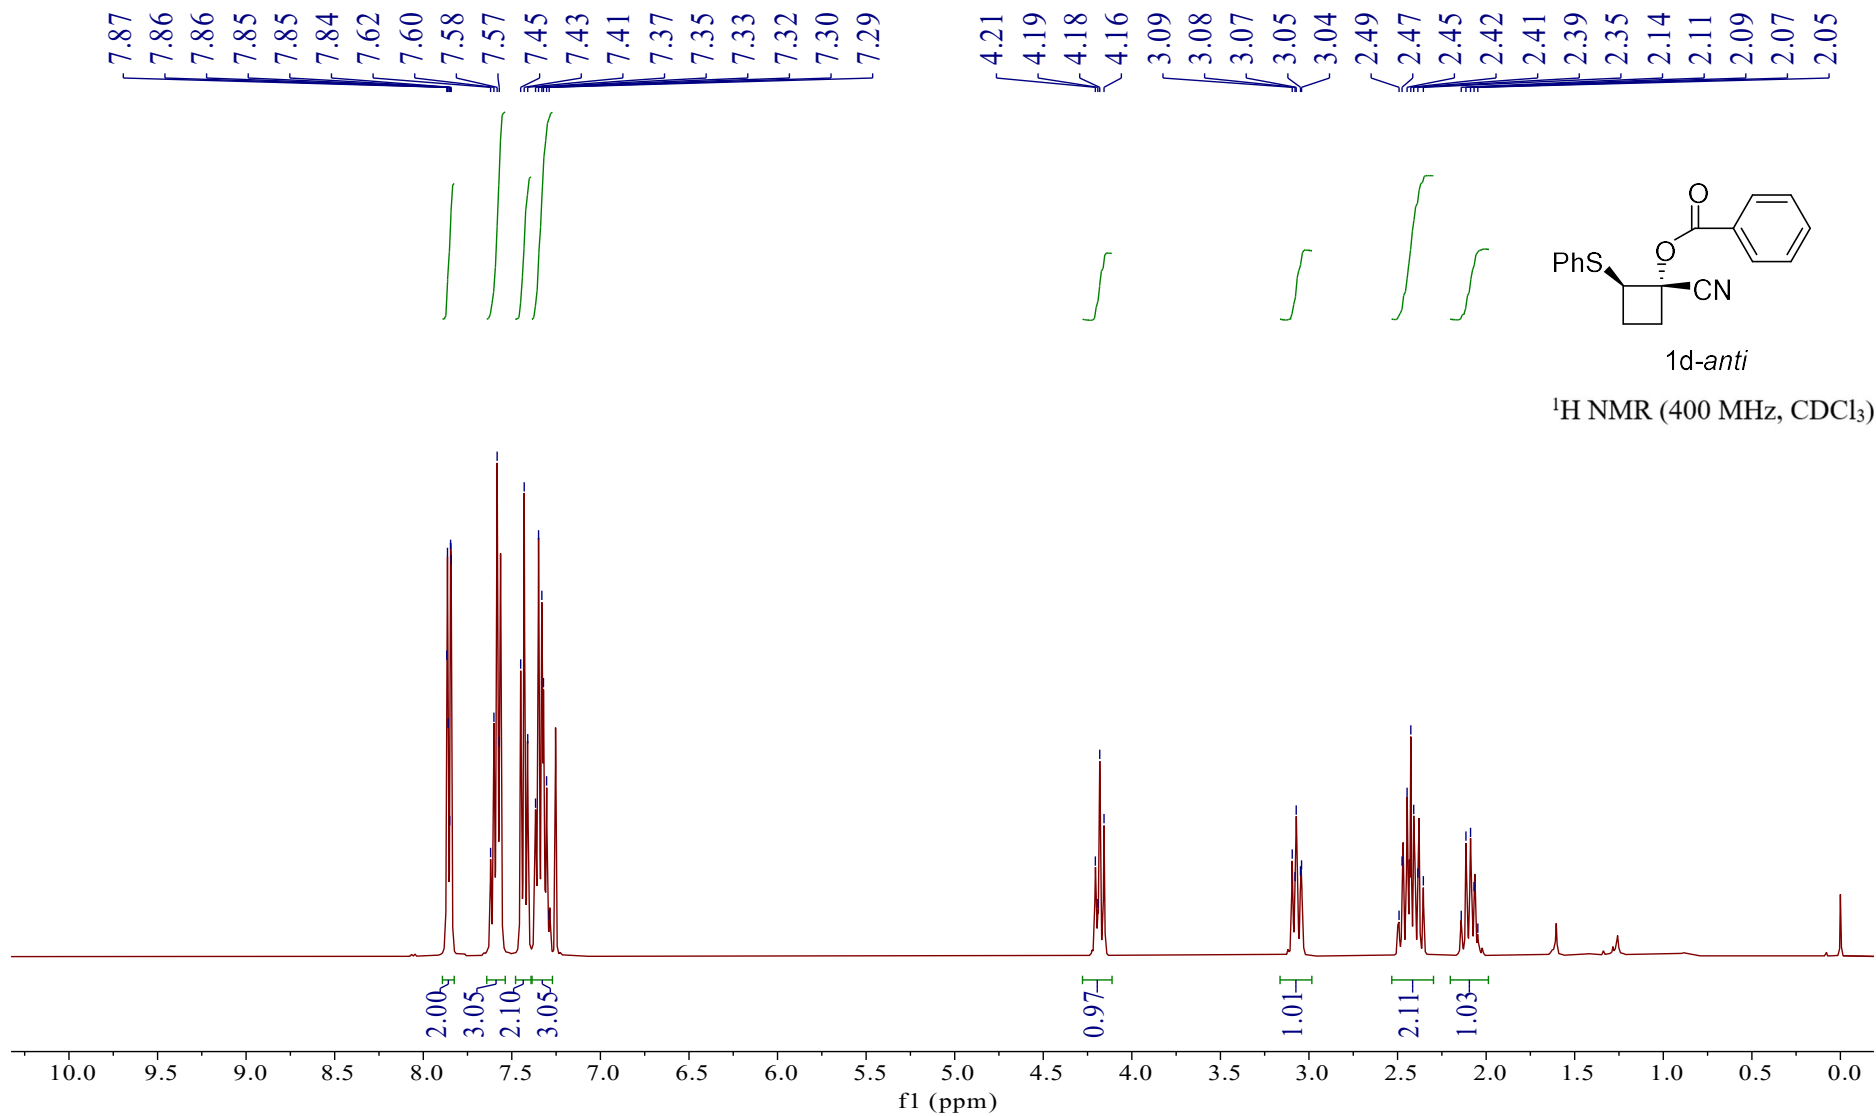

— 164.1  
— 134.2  
— 133.9  
— 132.2  
— 130.0  
— 129.3  
— 128.7  
— 128.3  
— 127.8  
— 116.3

— 76.8

— 50.5

— 33.2

— 22.3

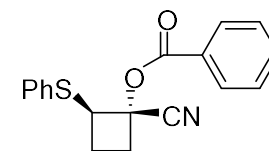

1d-anti

<sup>13</sup>C NMR (100 MHz, CDCl<sub>3</sub>)

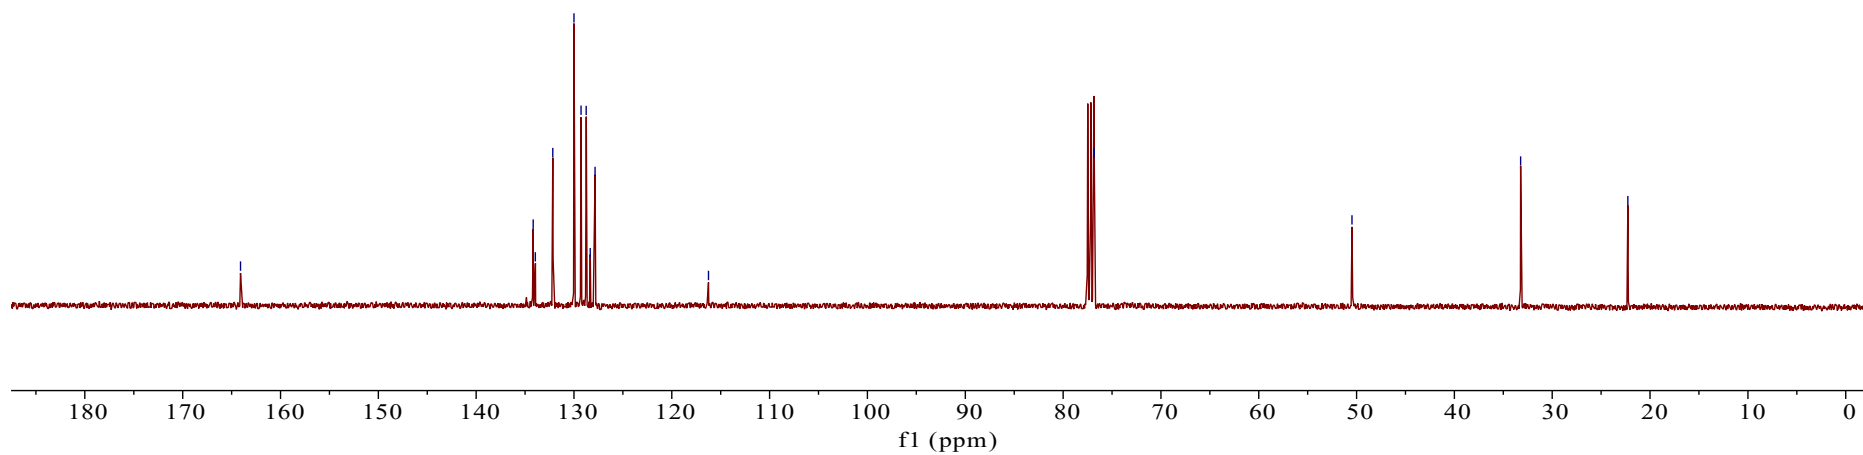

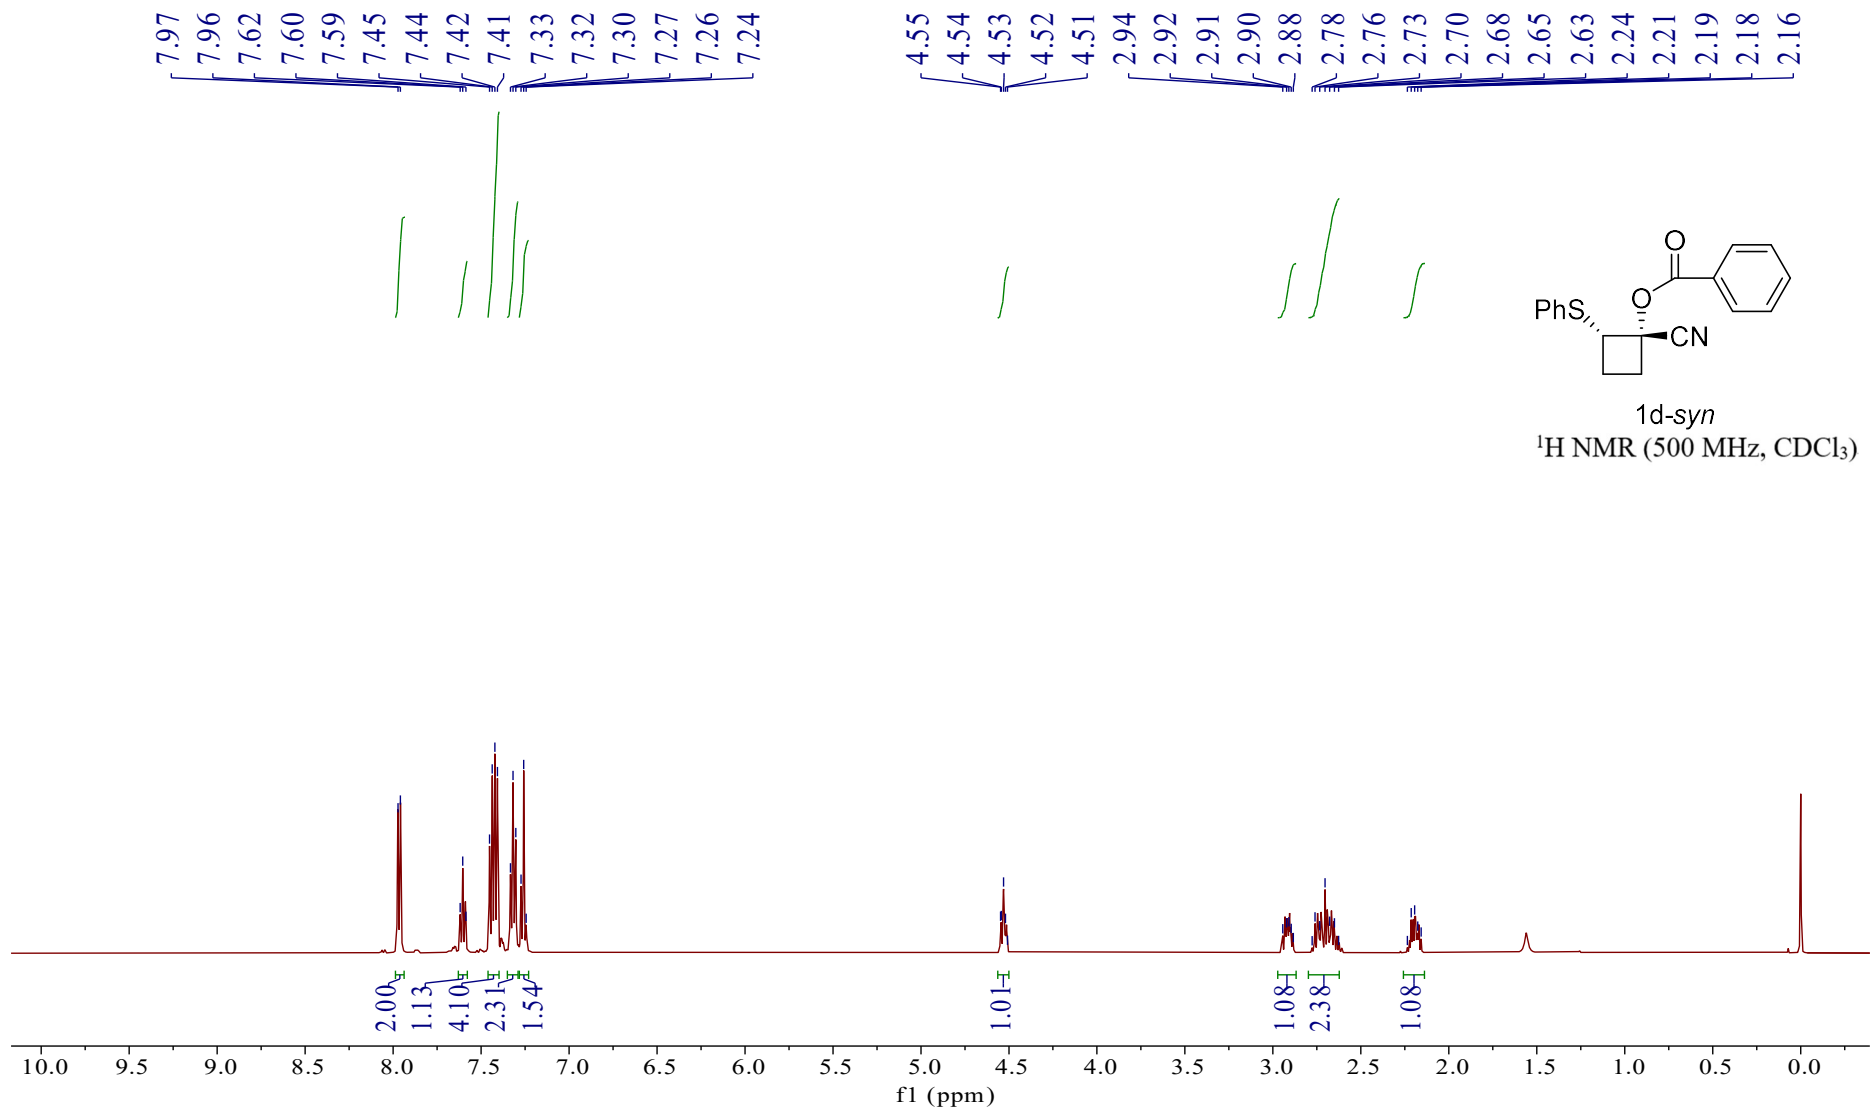

NMR-16

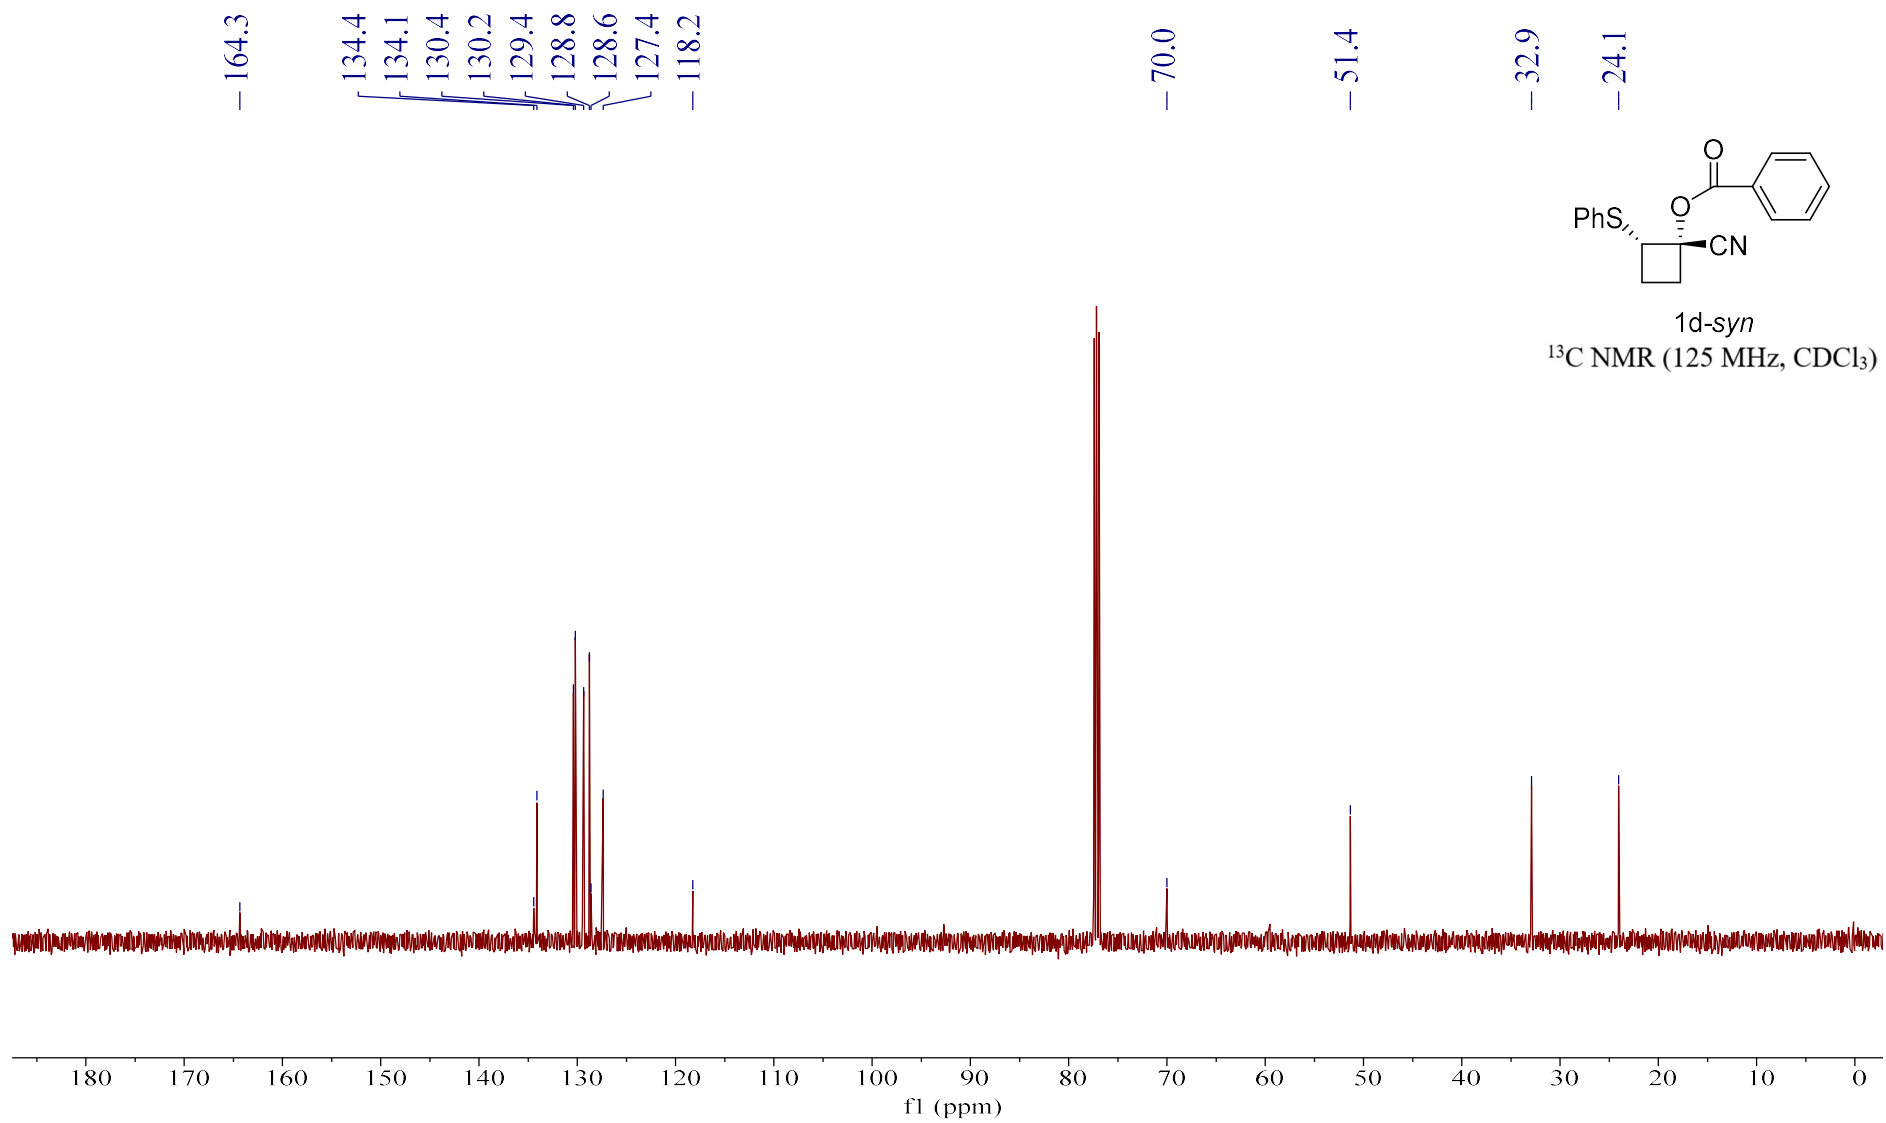

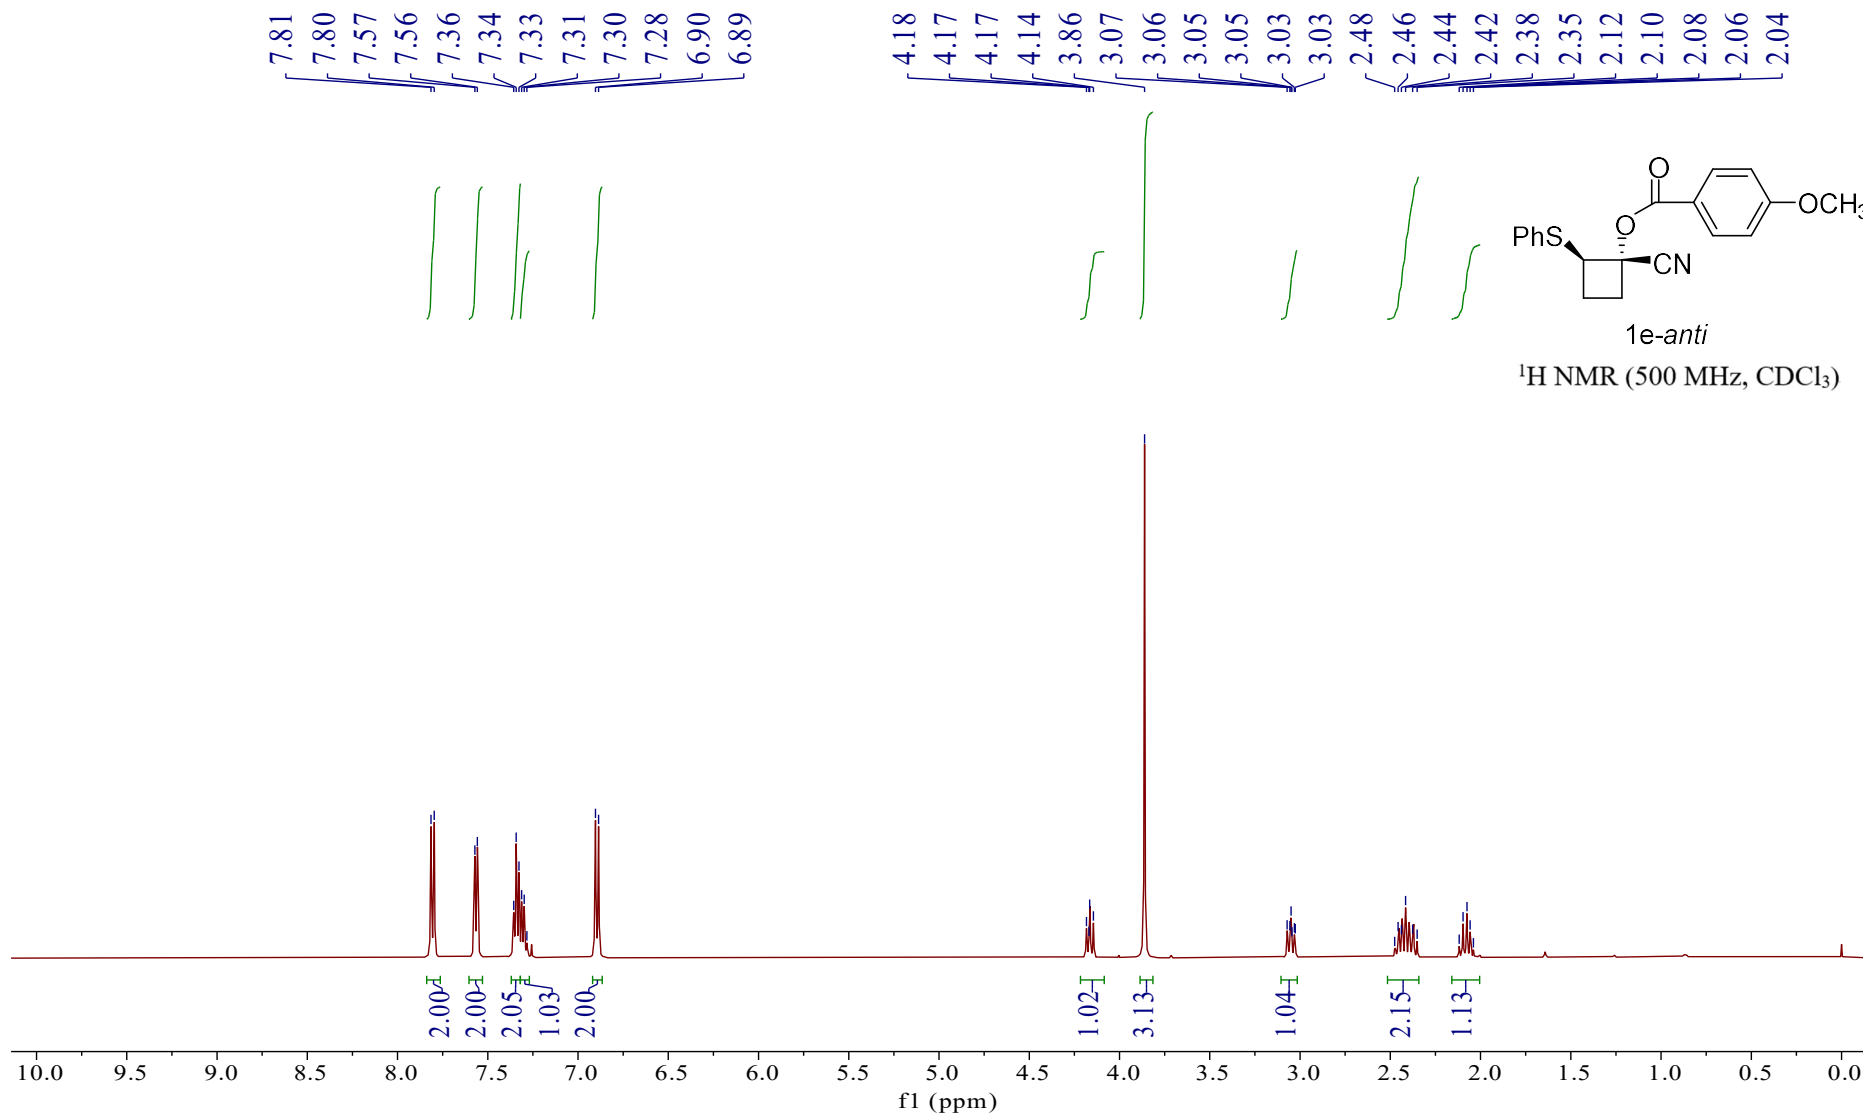

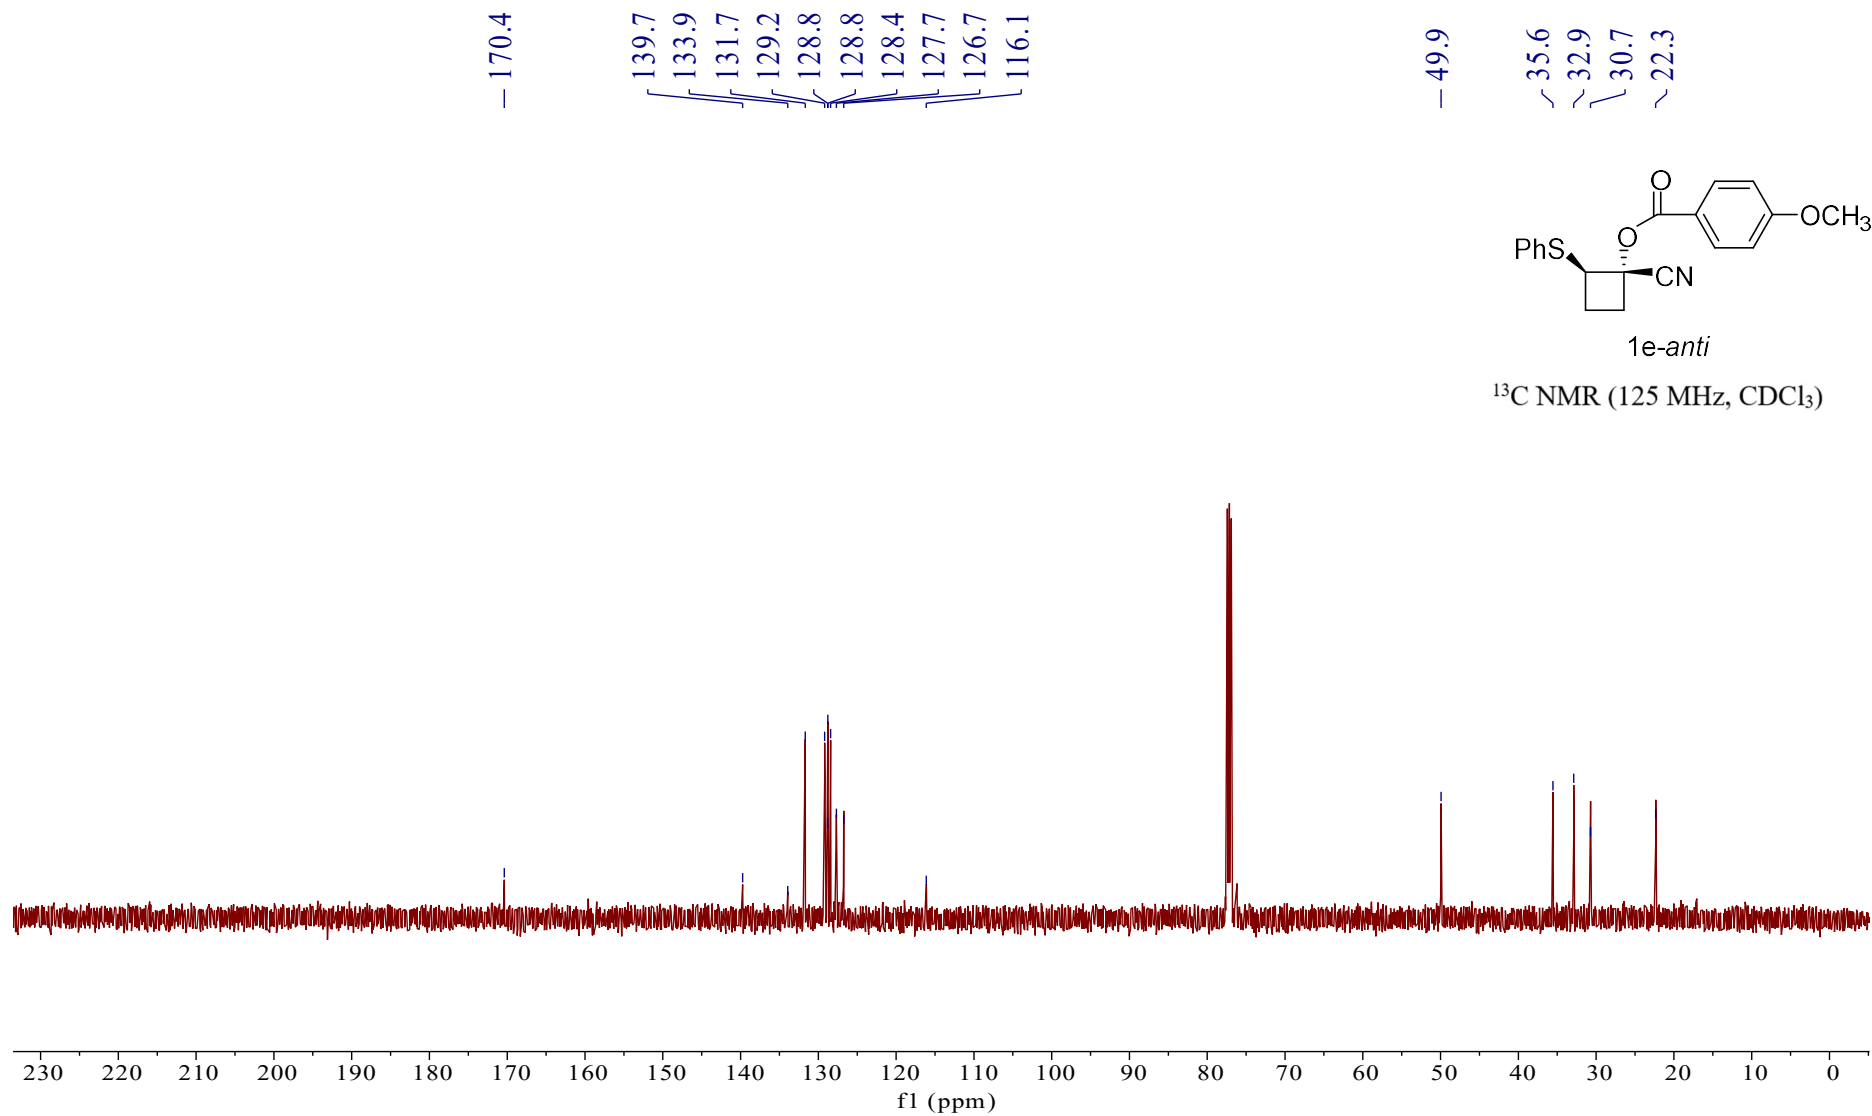

NMR-19

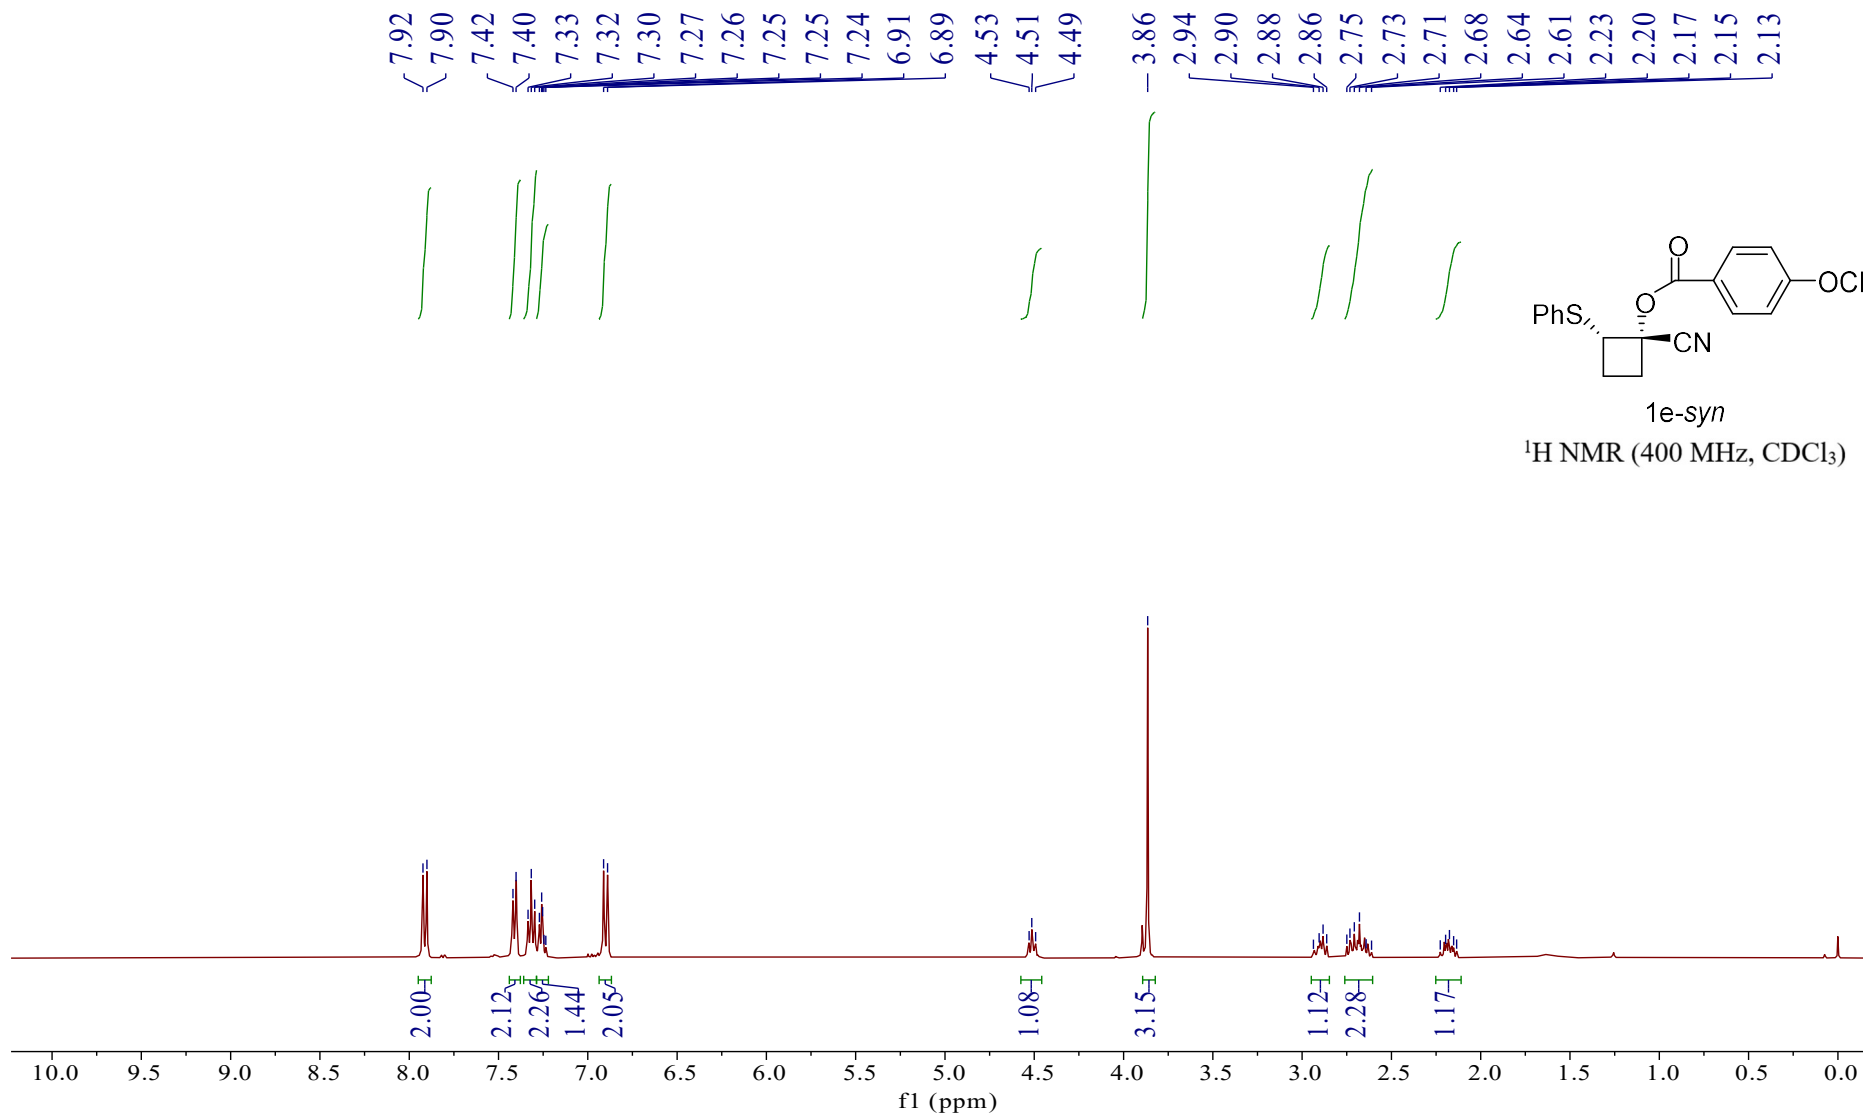

NMR-20



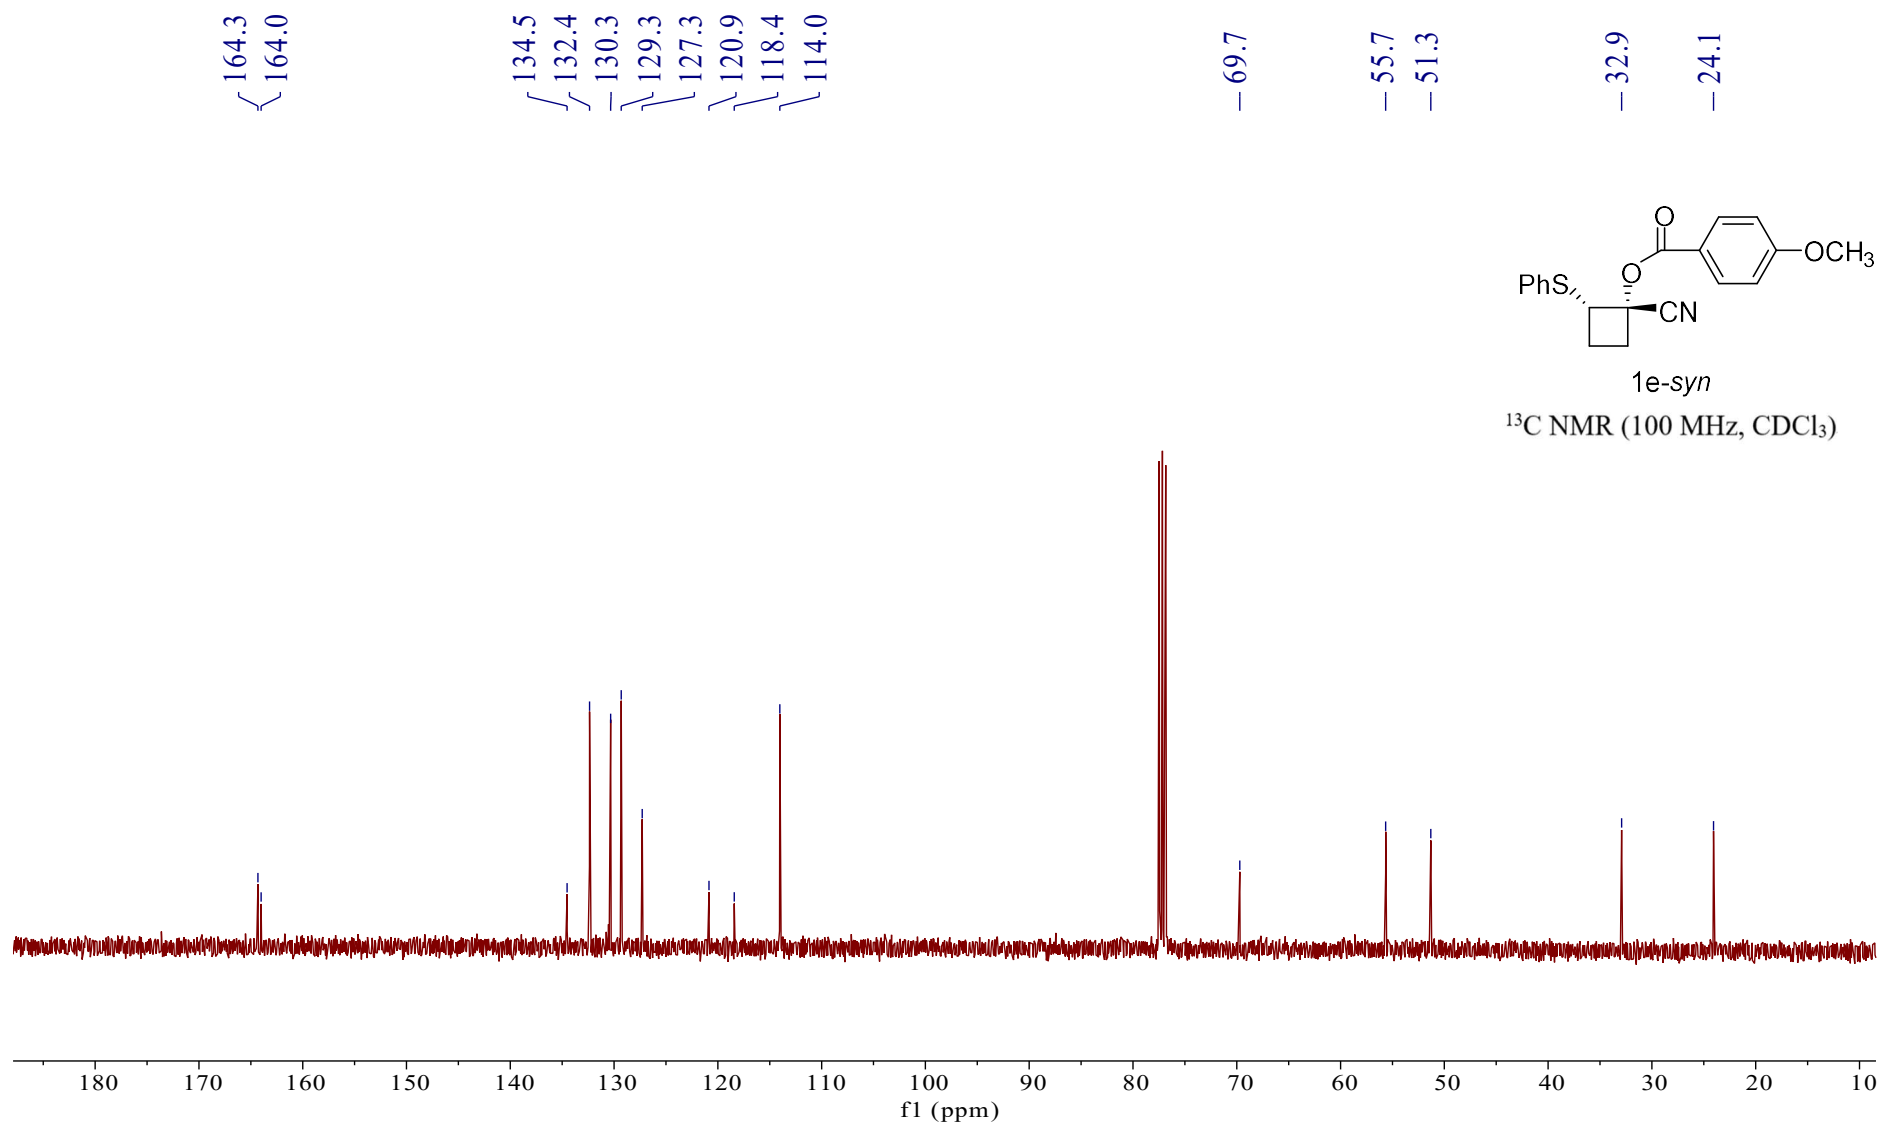

NMR-21

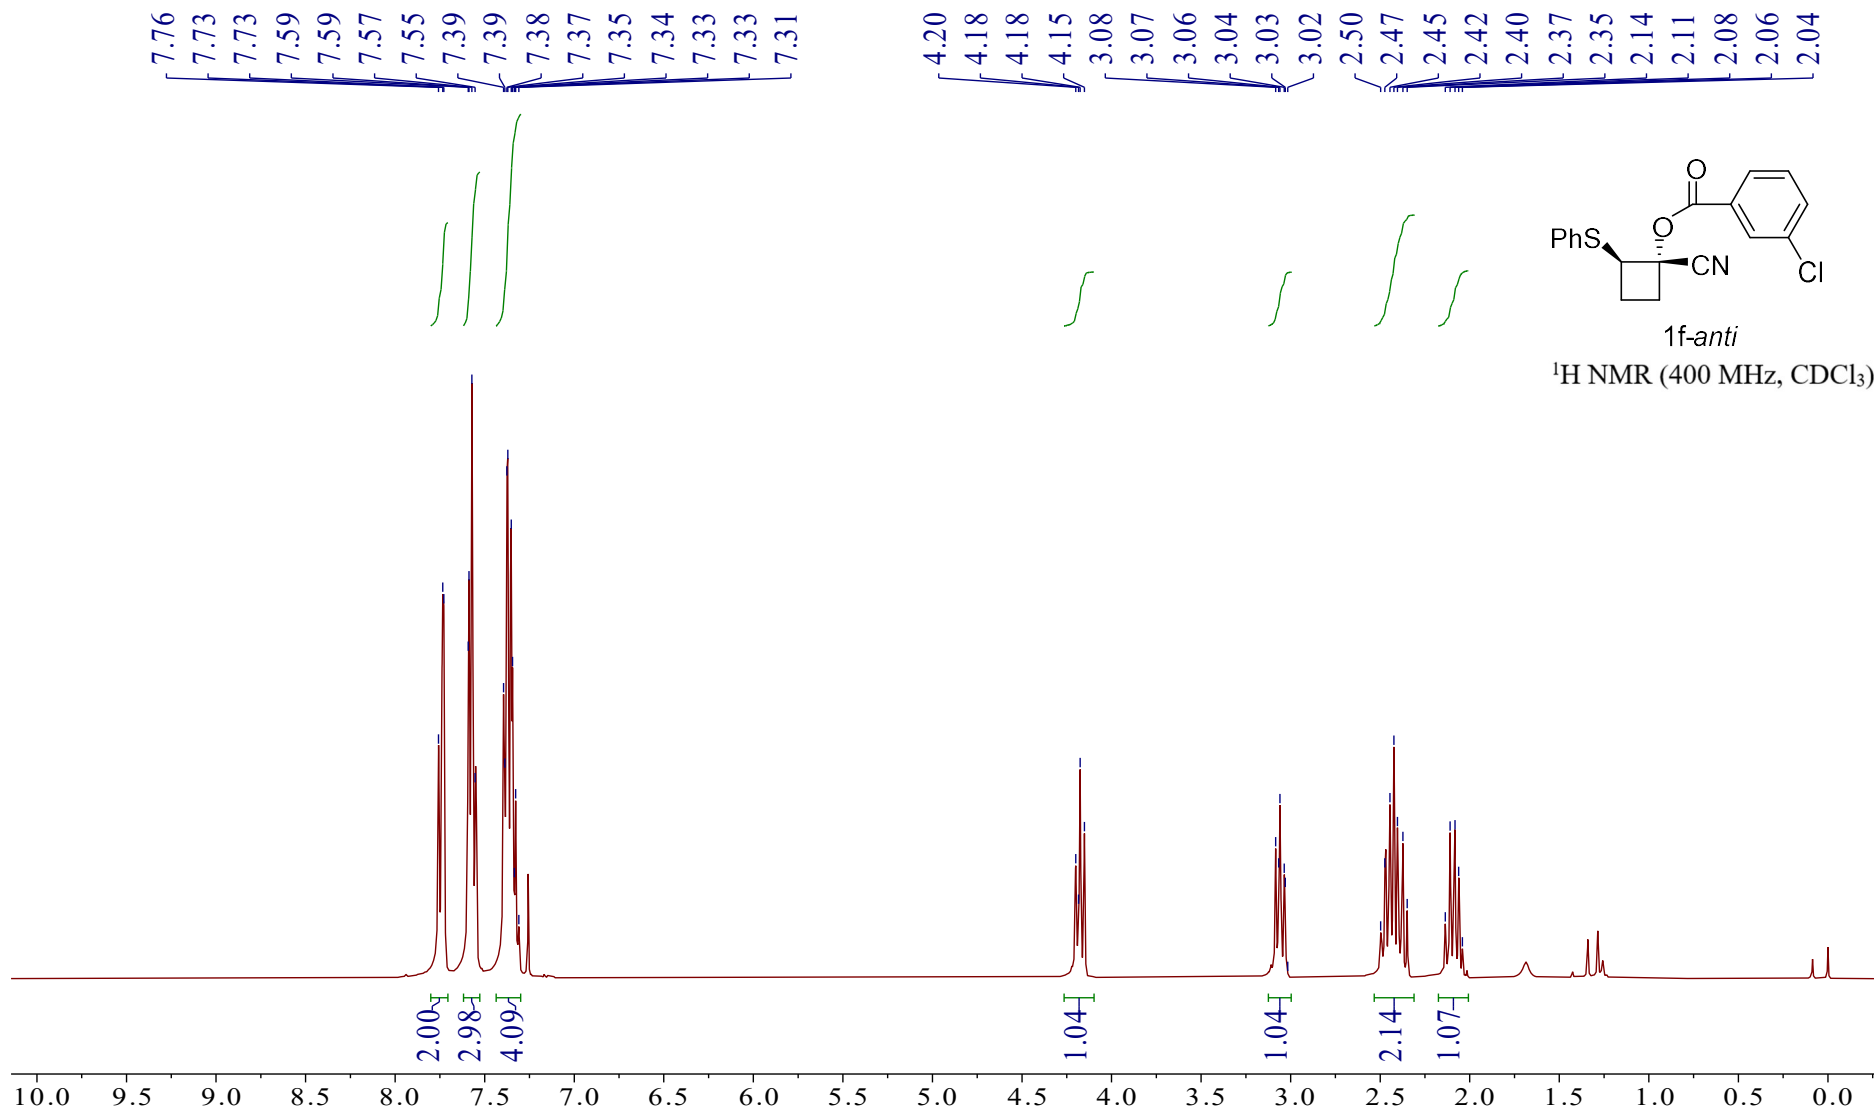

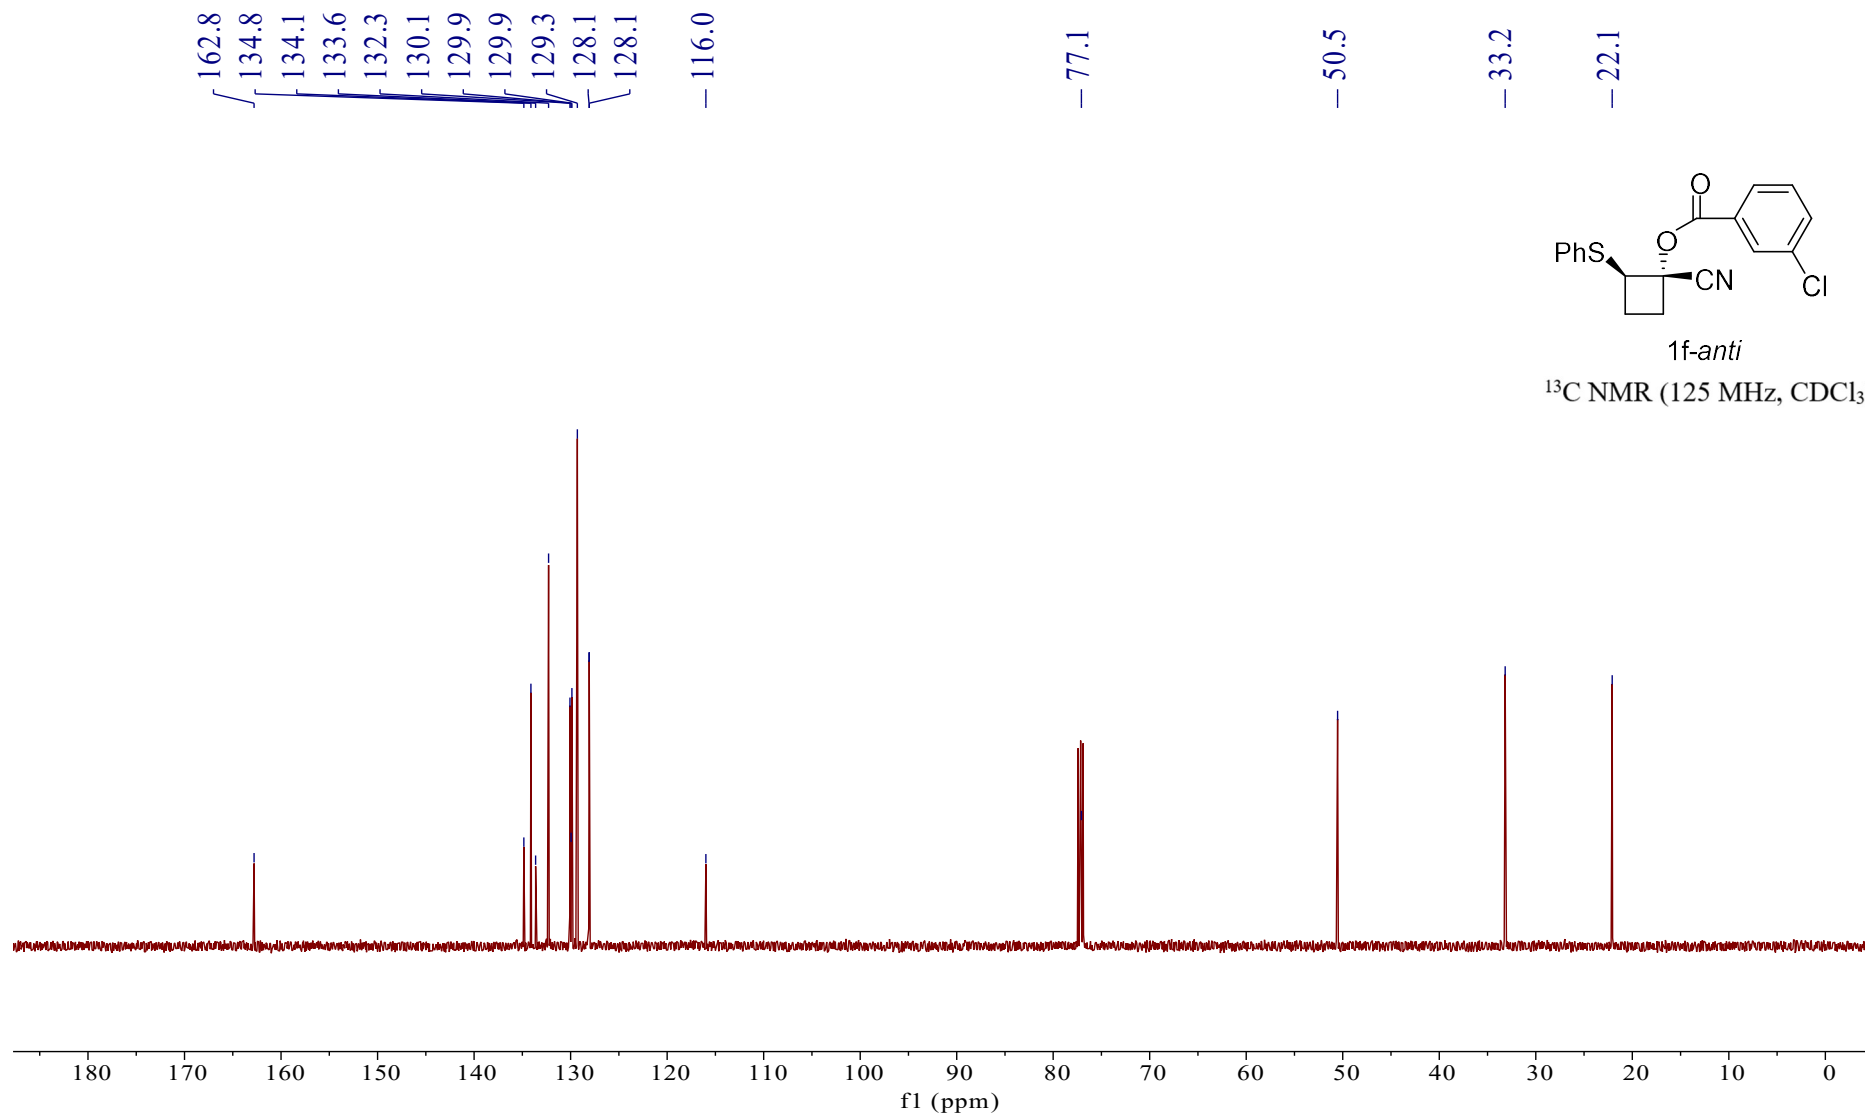

NMR-23

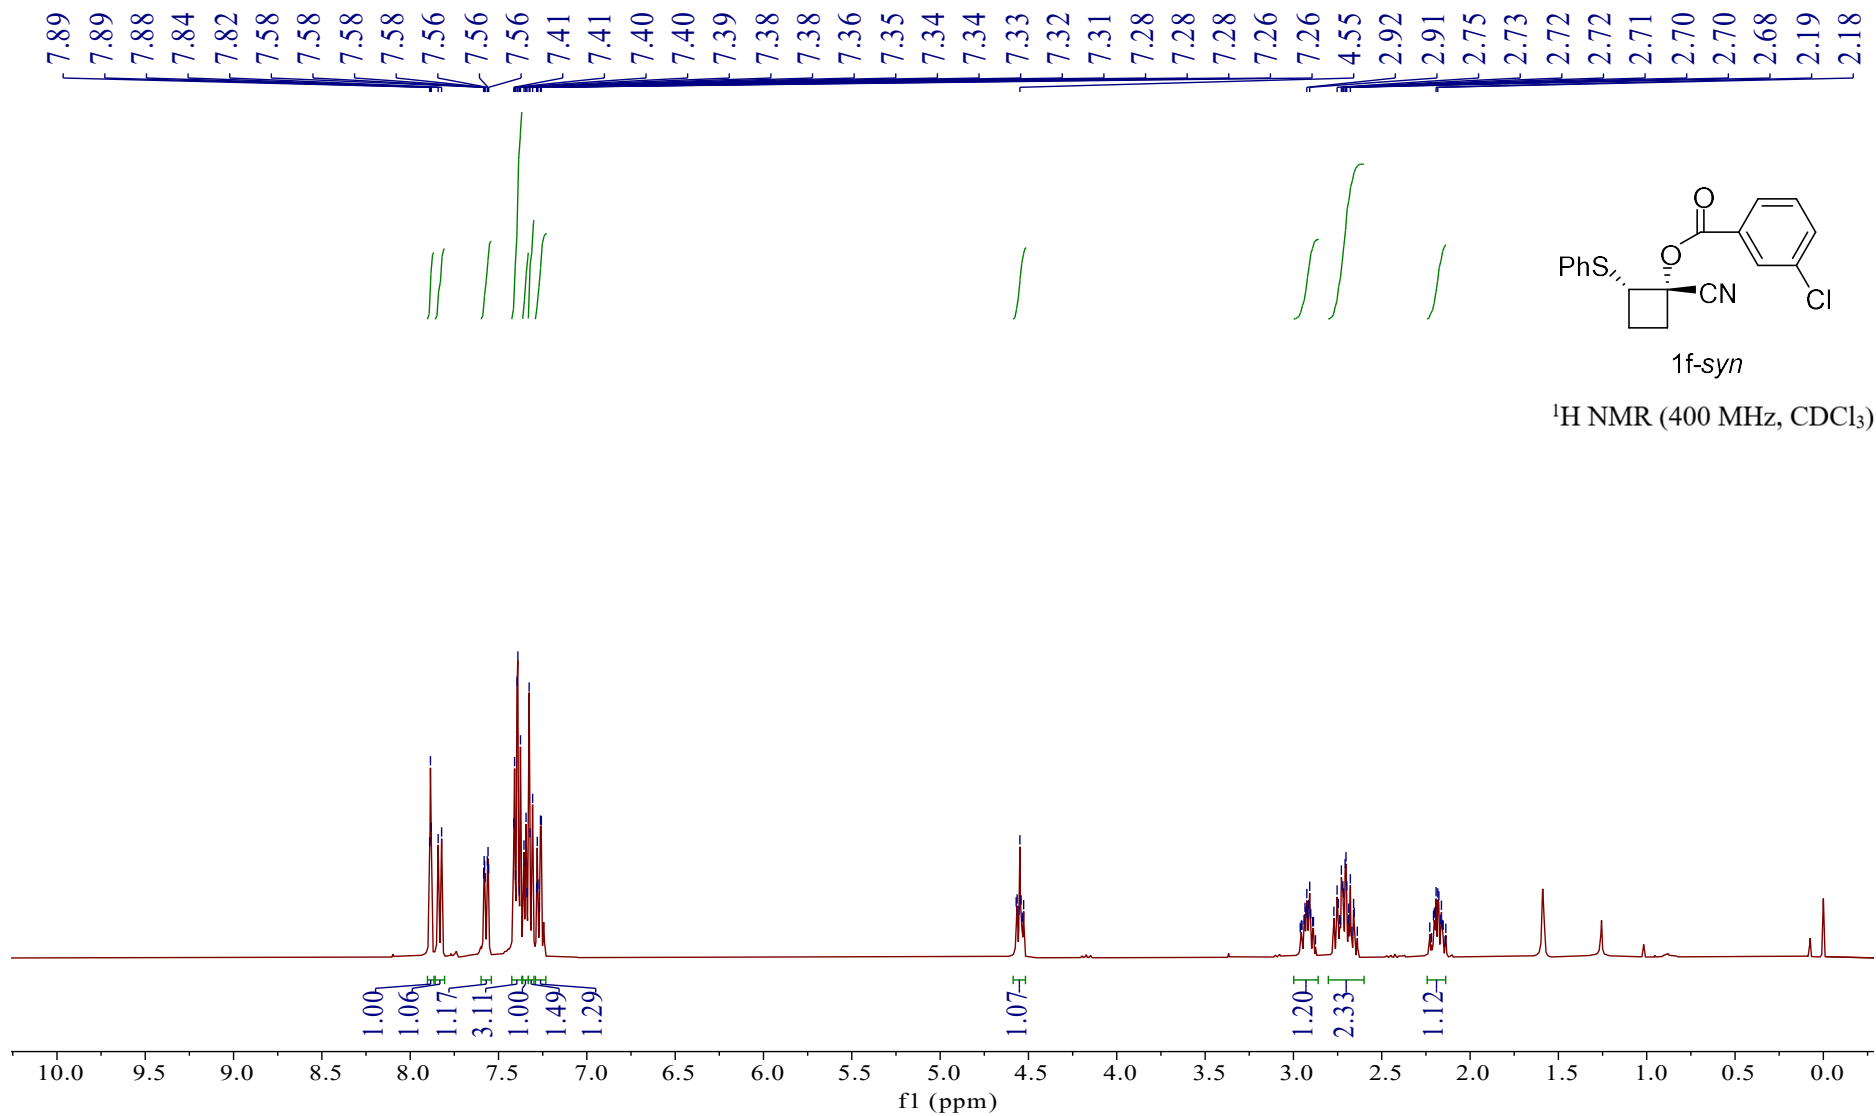

NMR-24

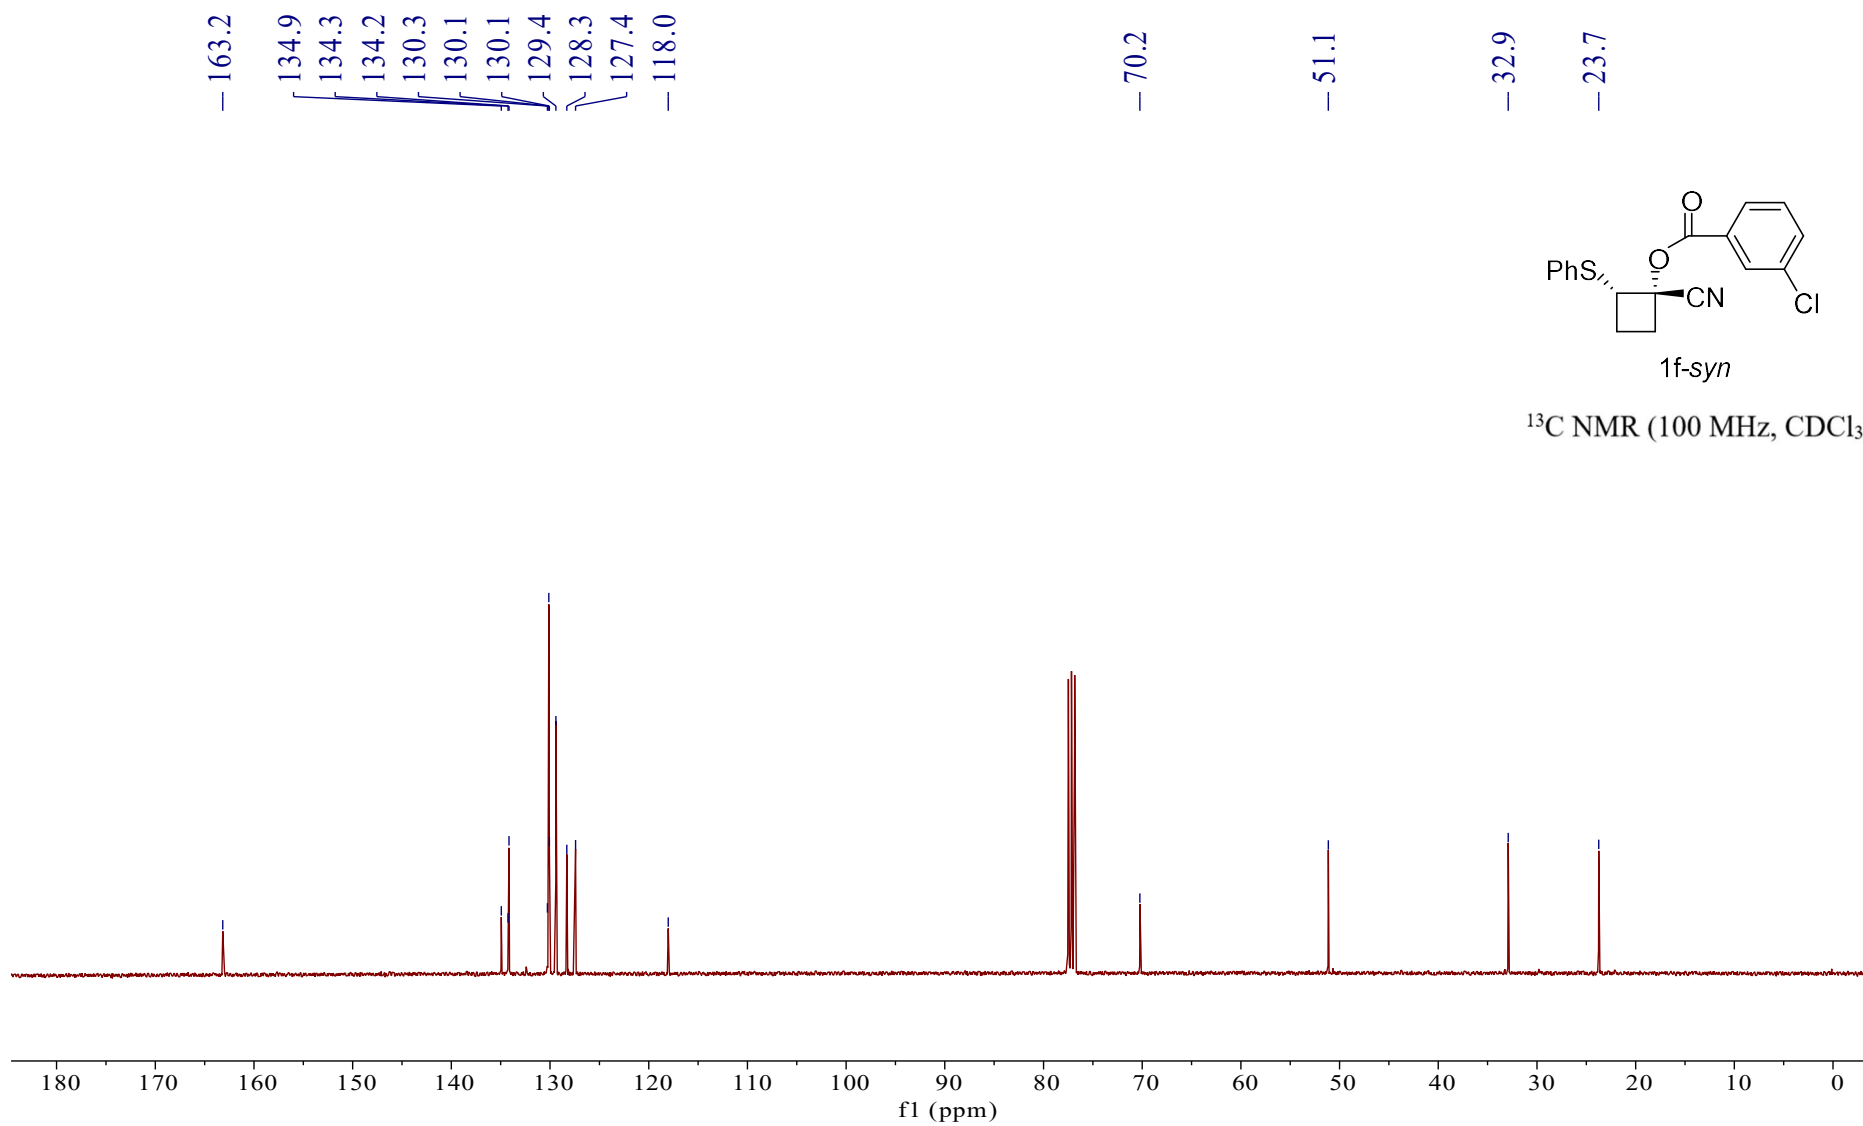

NMR-25

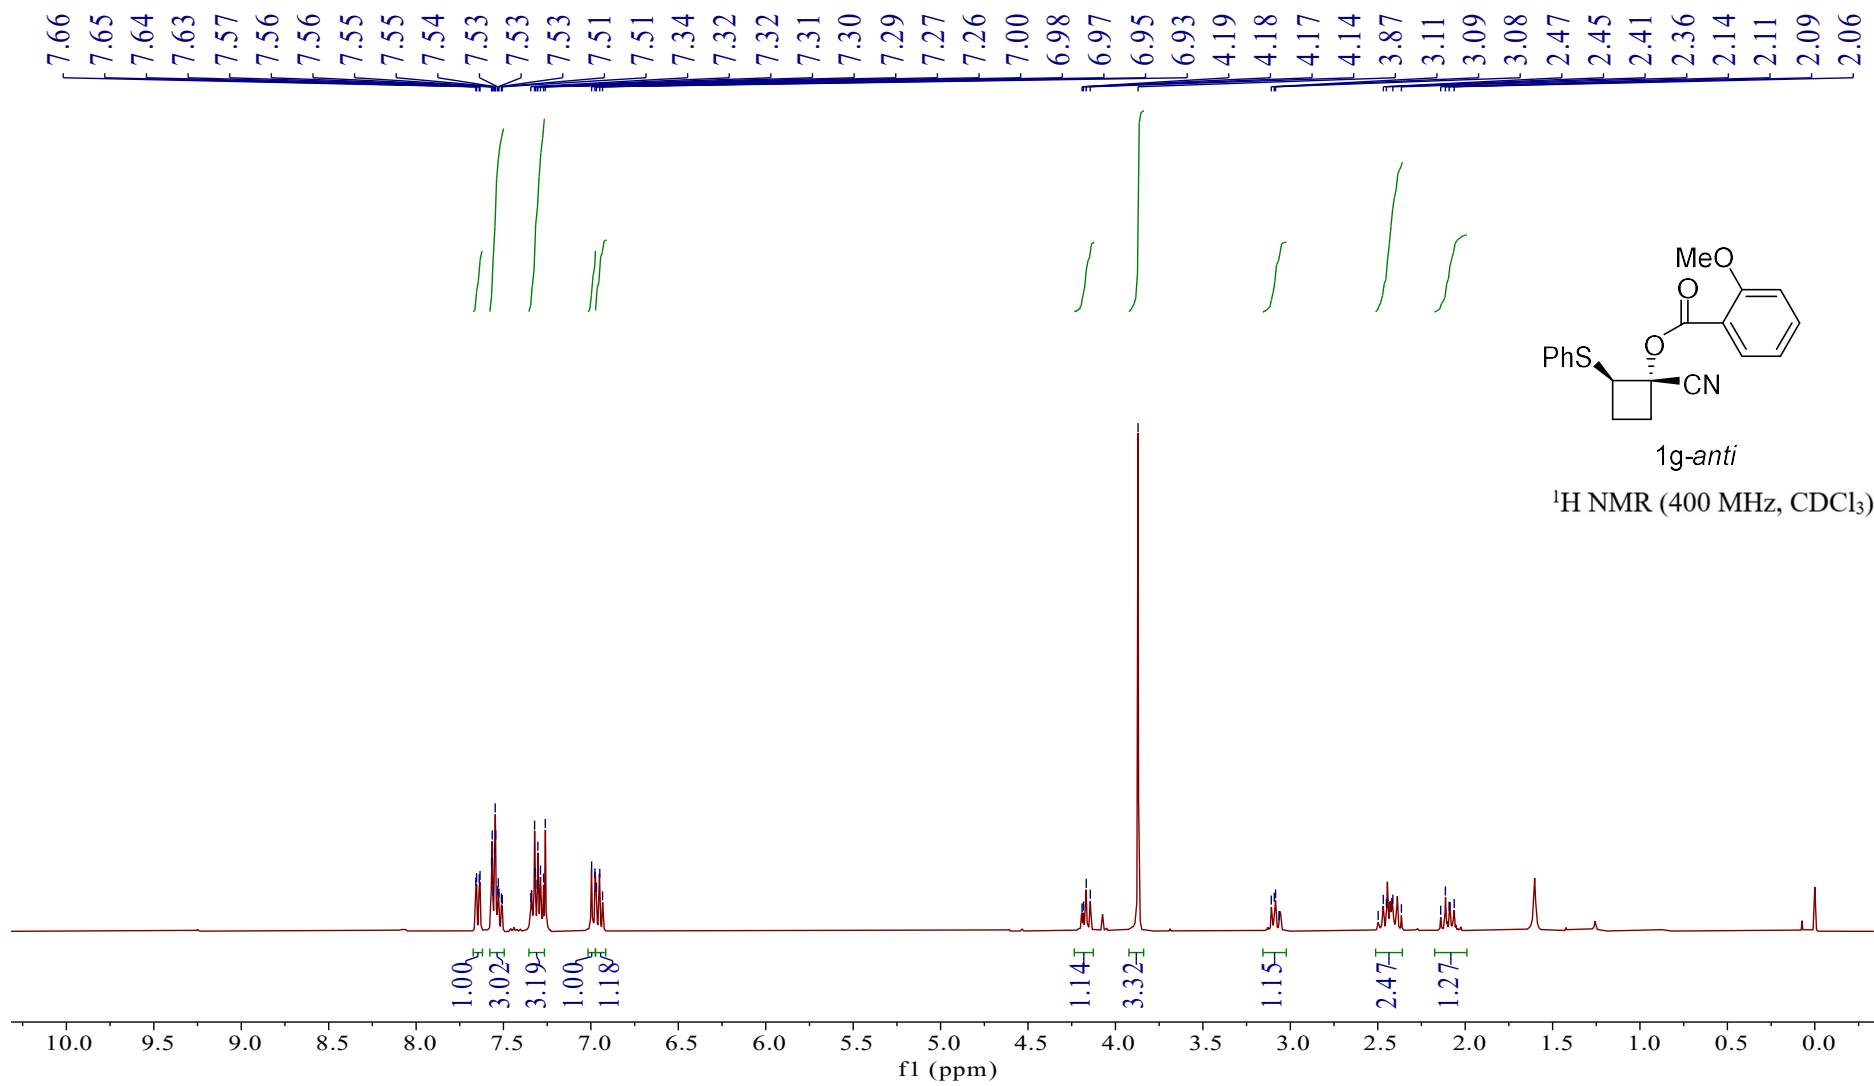

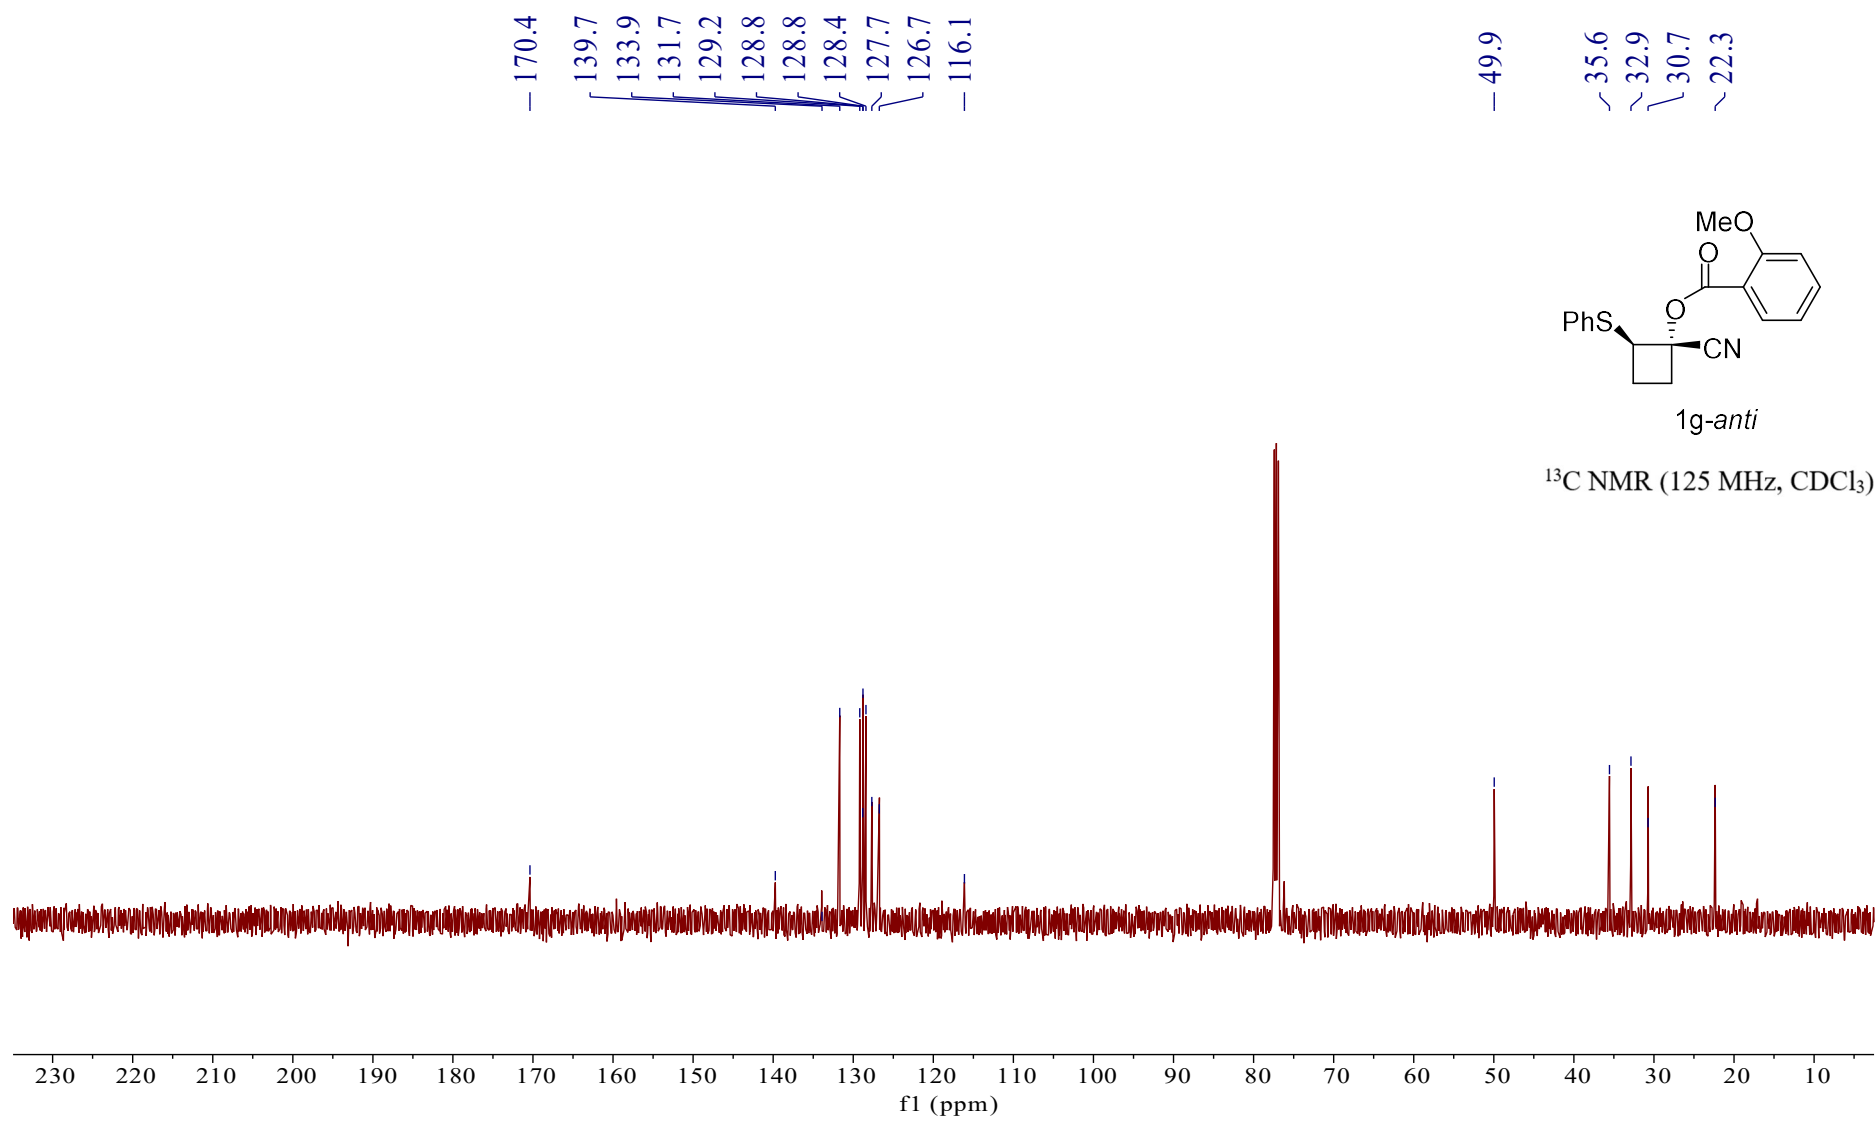

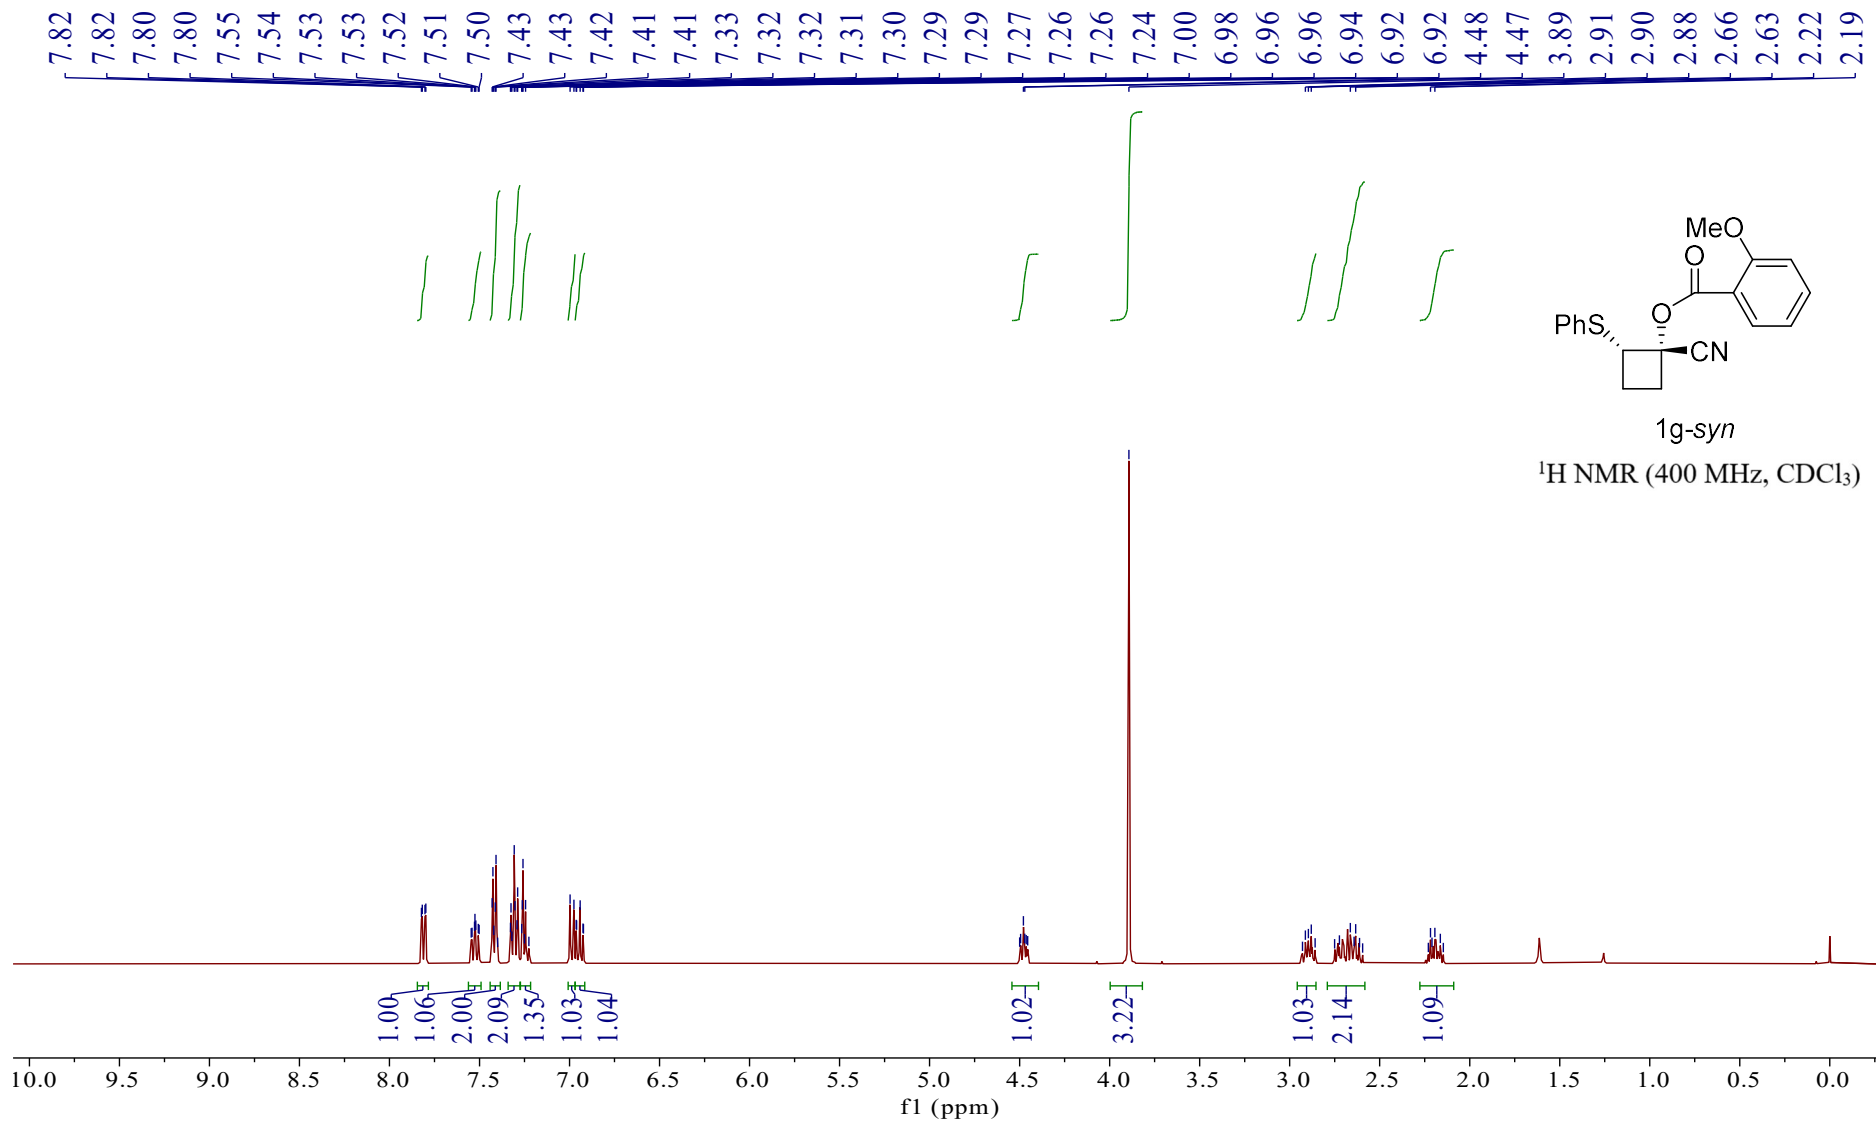

NMR-28



~ 163.2  
~ 160.6

135.2  
134.6  
132.7  
130.5  
129.3  
127.3  
120.3  
118.4  
117.4  
112.2

- 70.0

- 56.0  
- 51.4

- 33.0

- 24.4

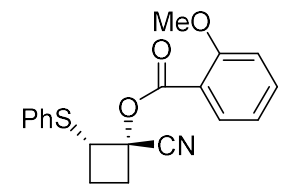

1g-syn

<sup>13</sup>C NMR (100 MHz, CDCl<sub>3</sub>)

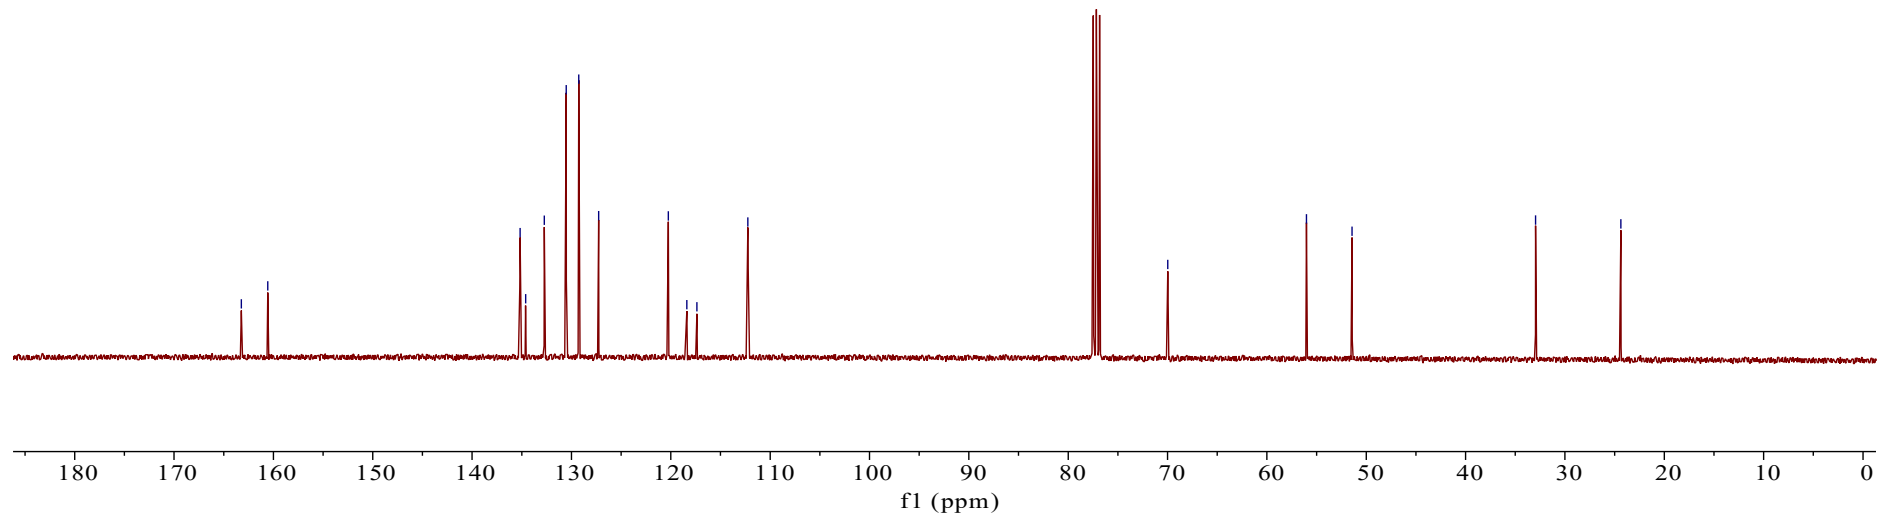

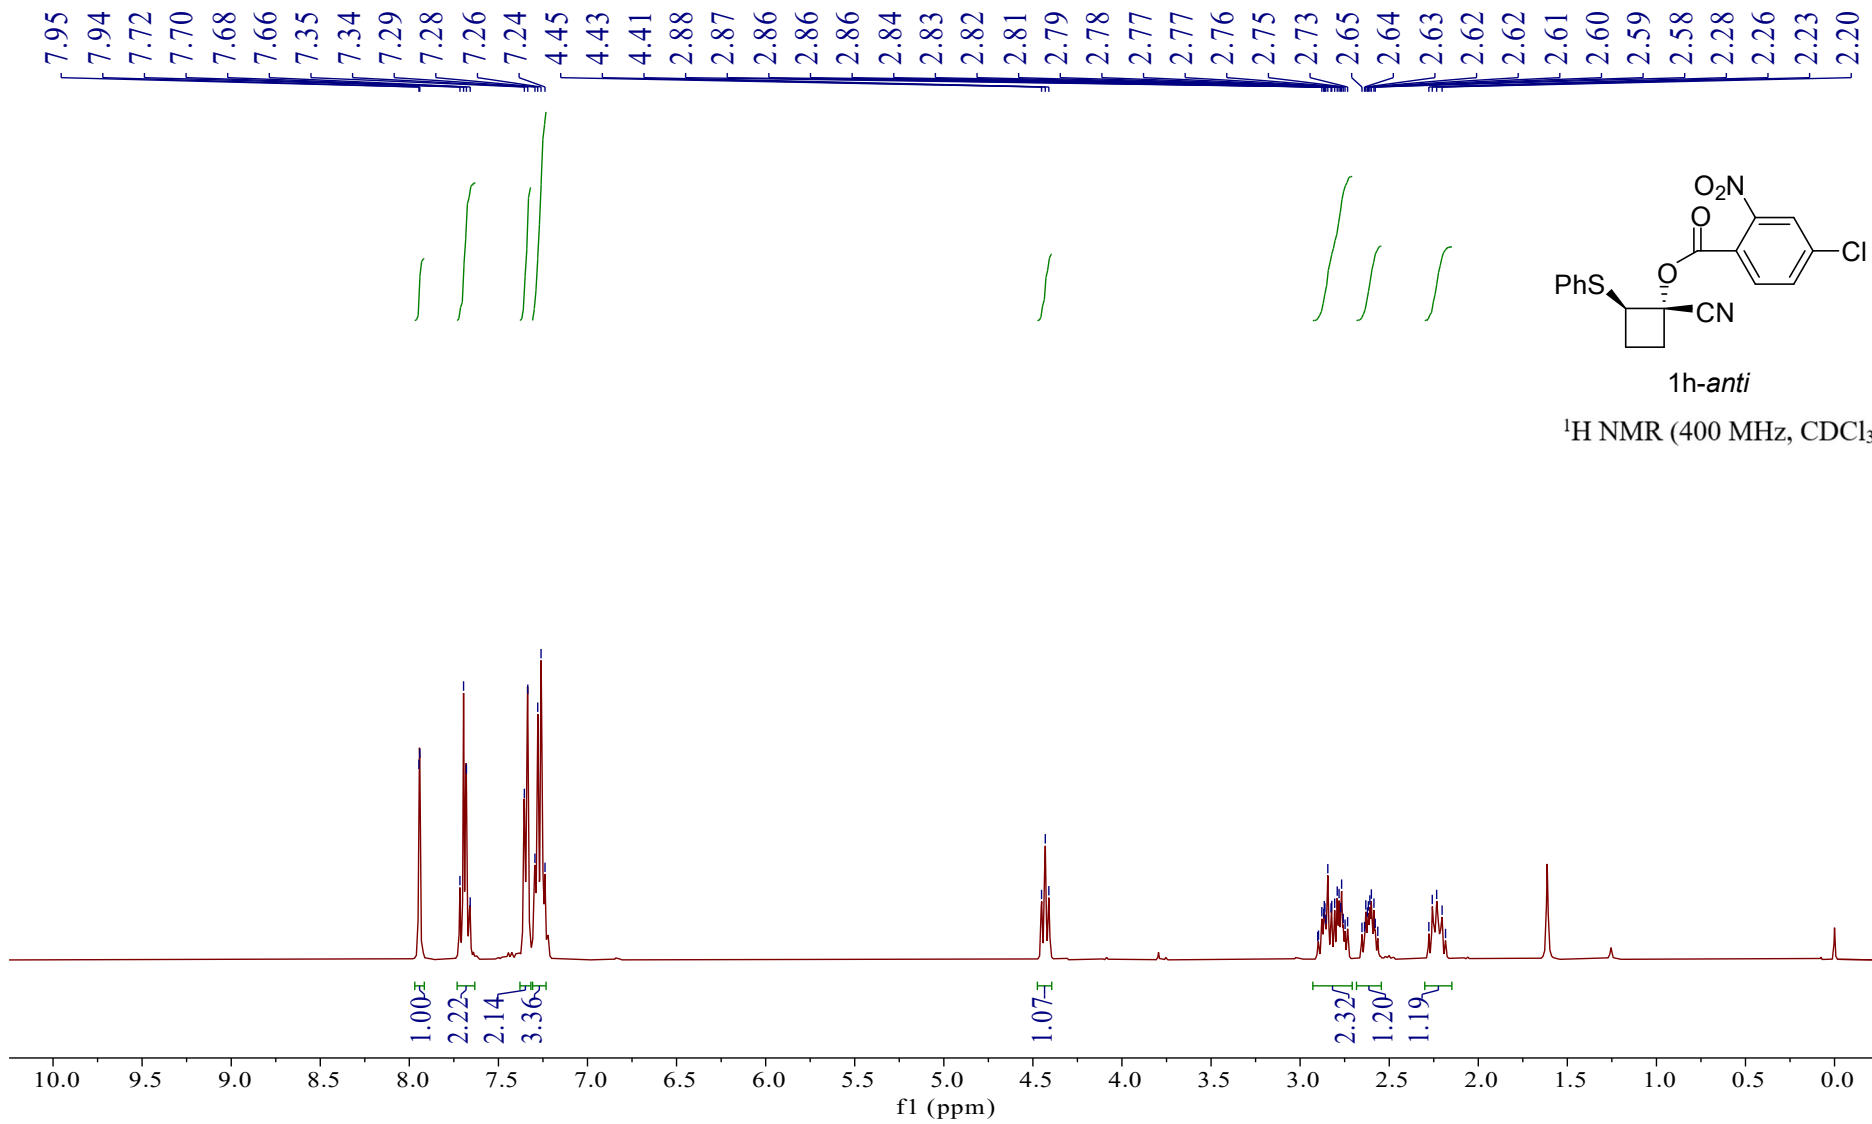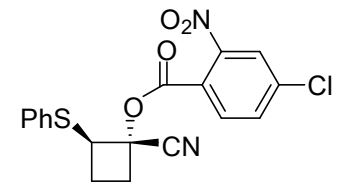

1h-anti

<sup>1</sup>H NMR (400 MHz, CDCl<sub>3</sub>)

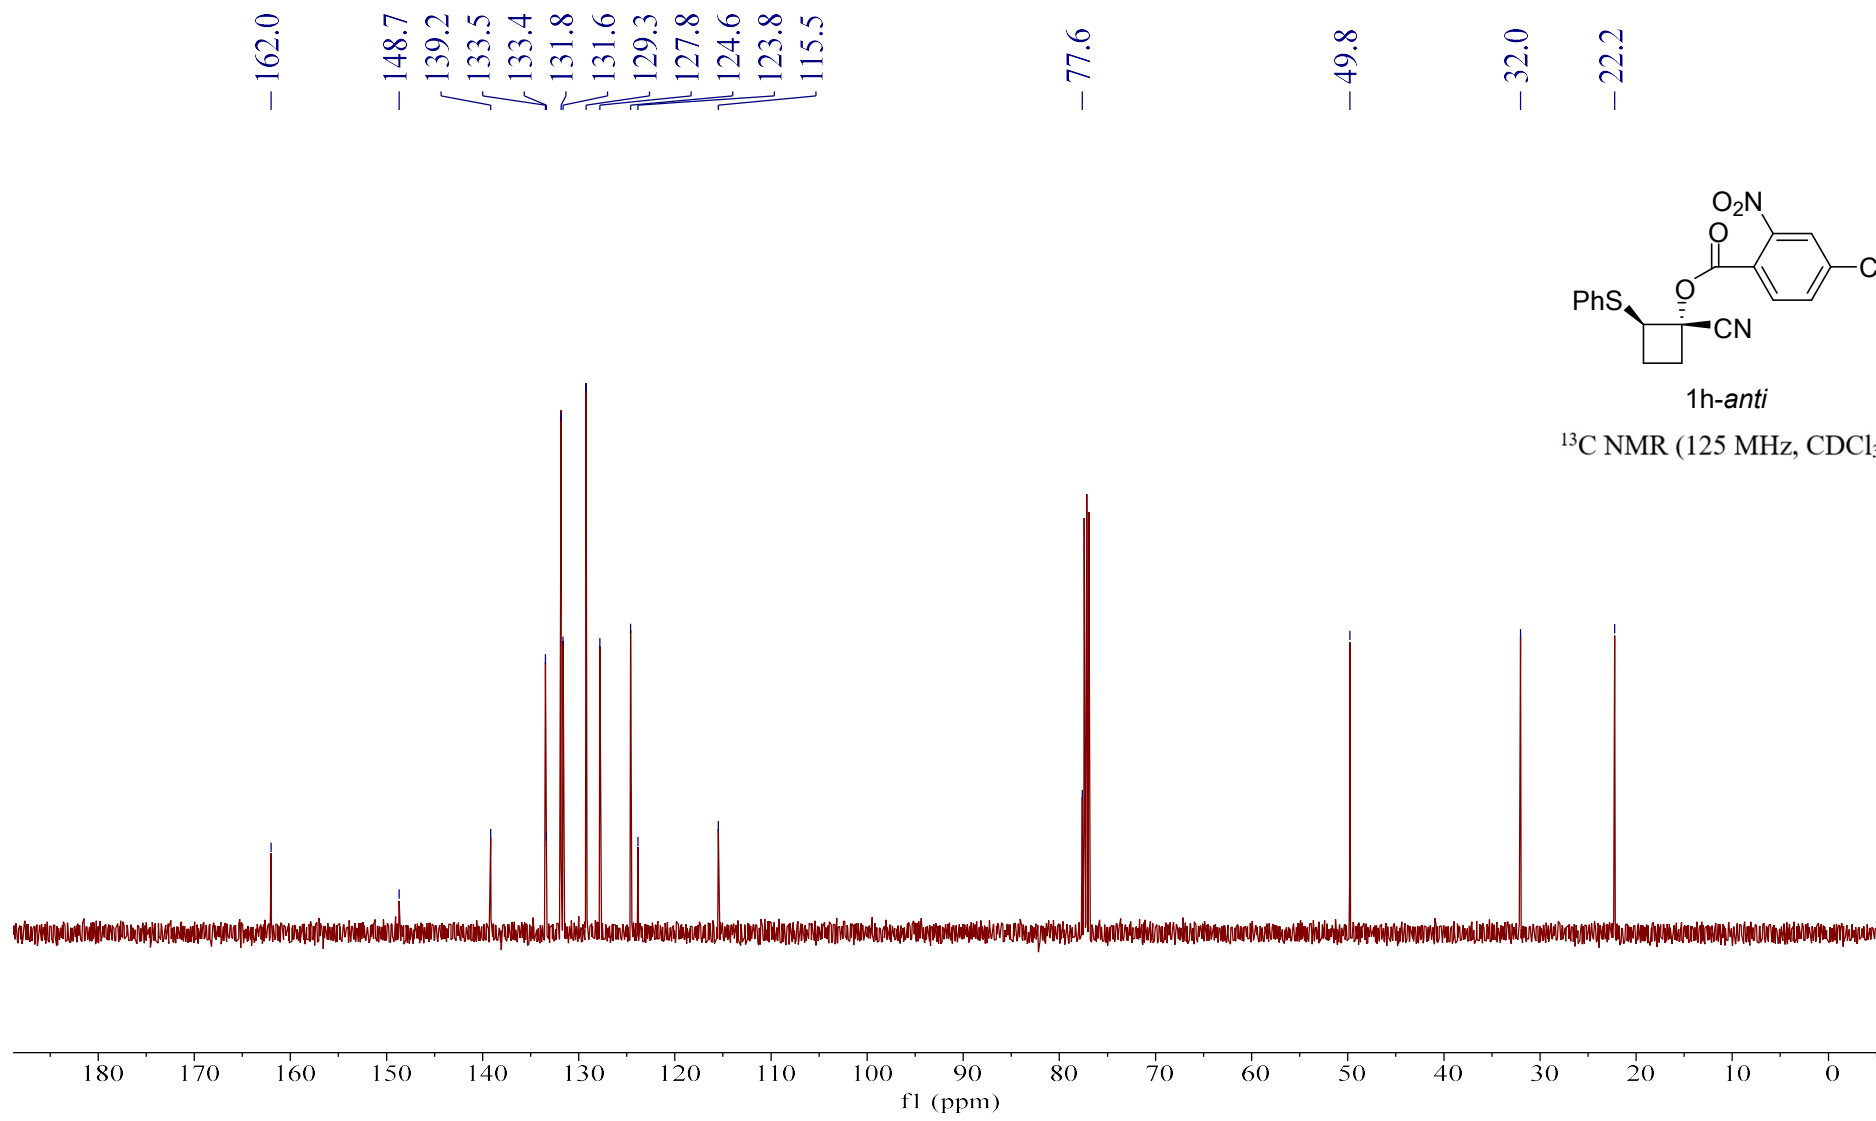

NMR-31

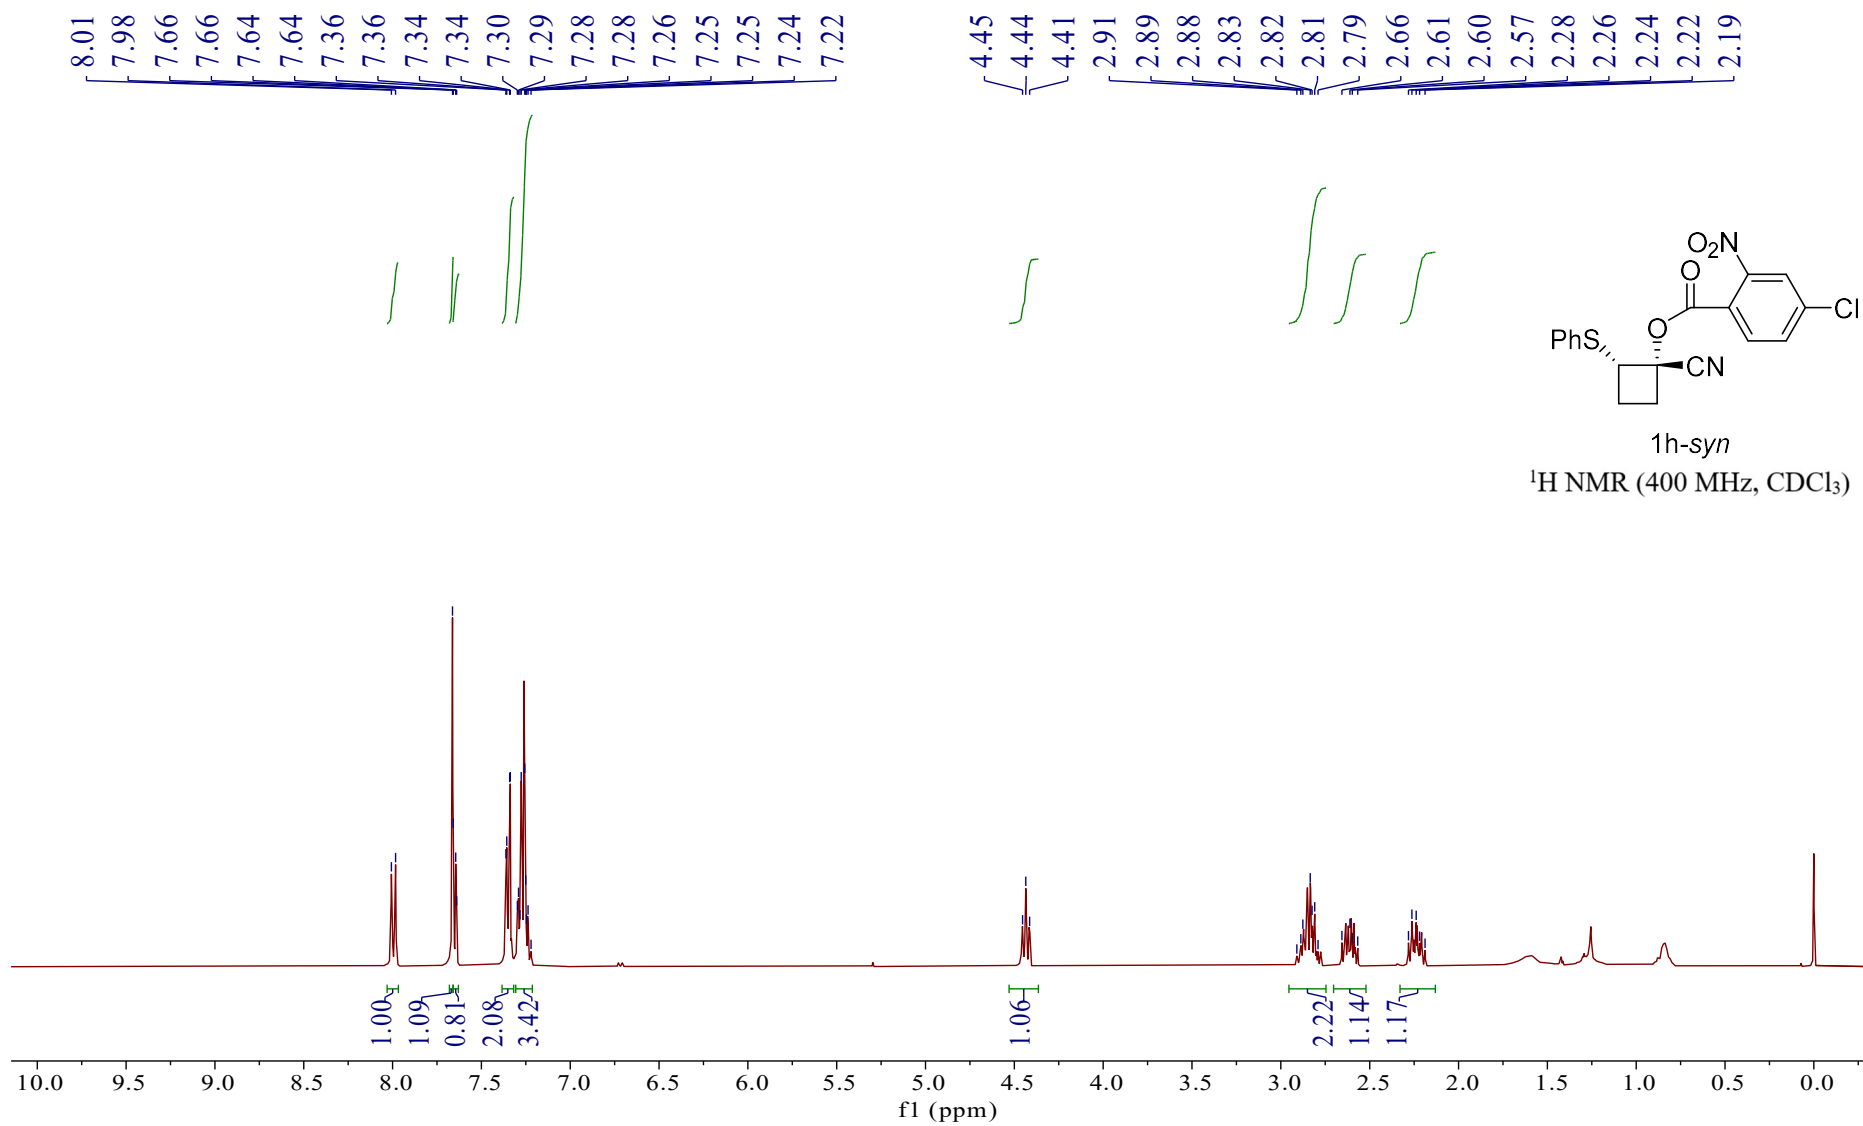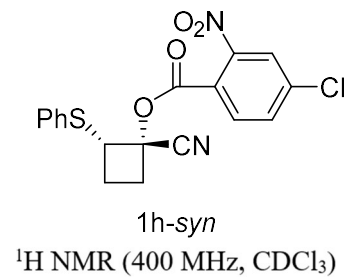

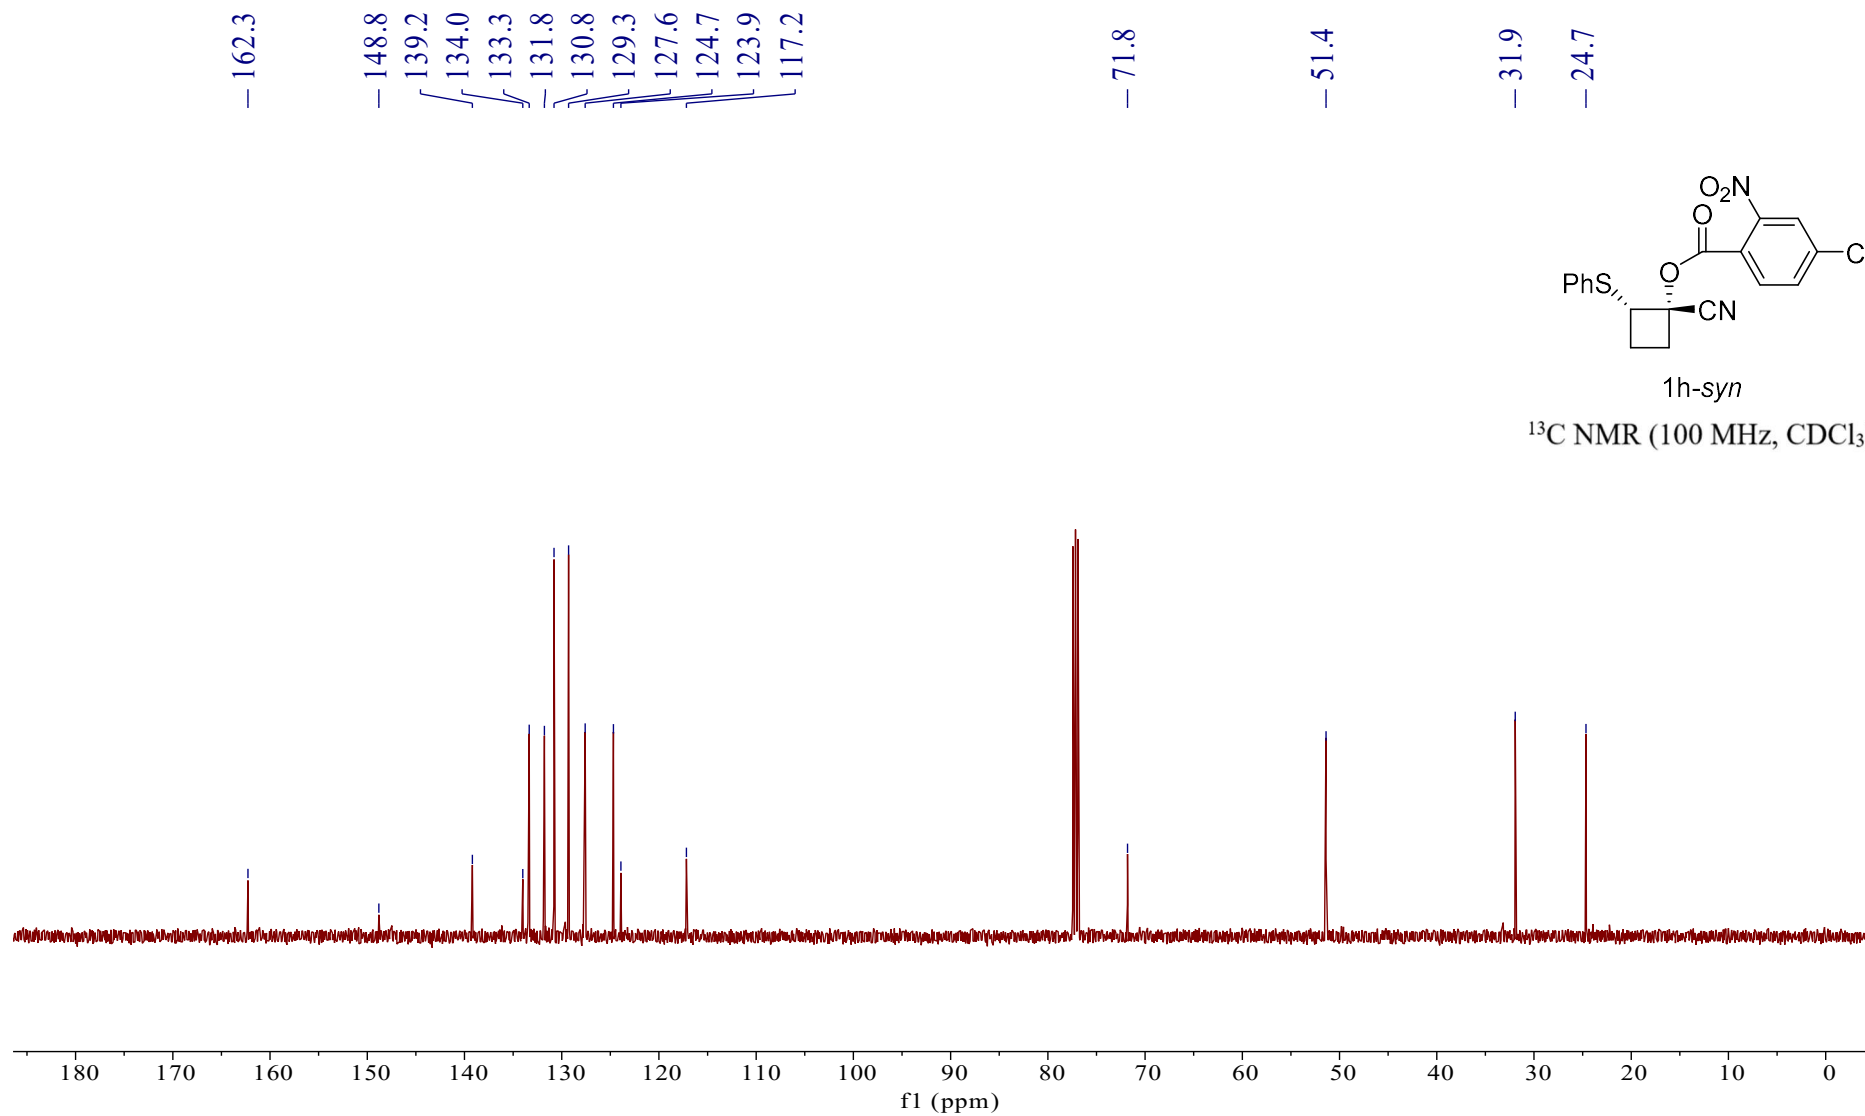

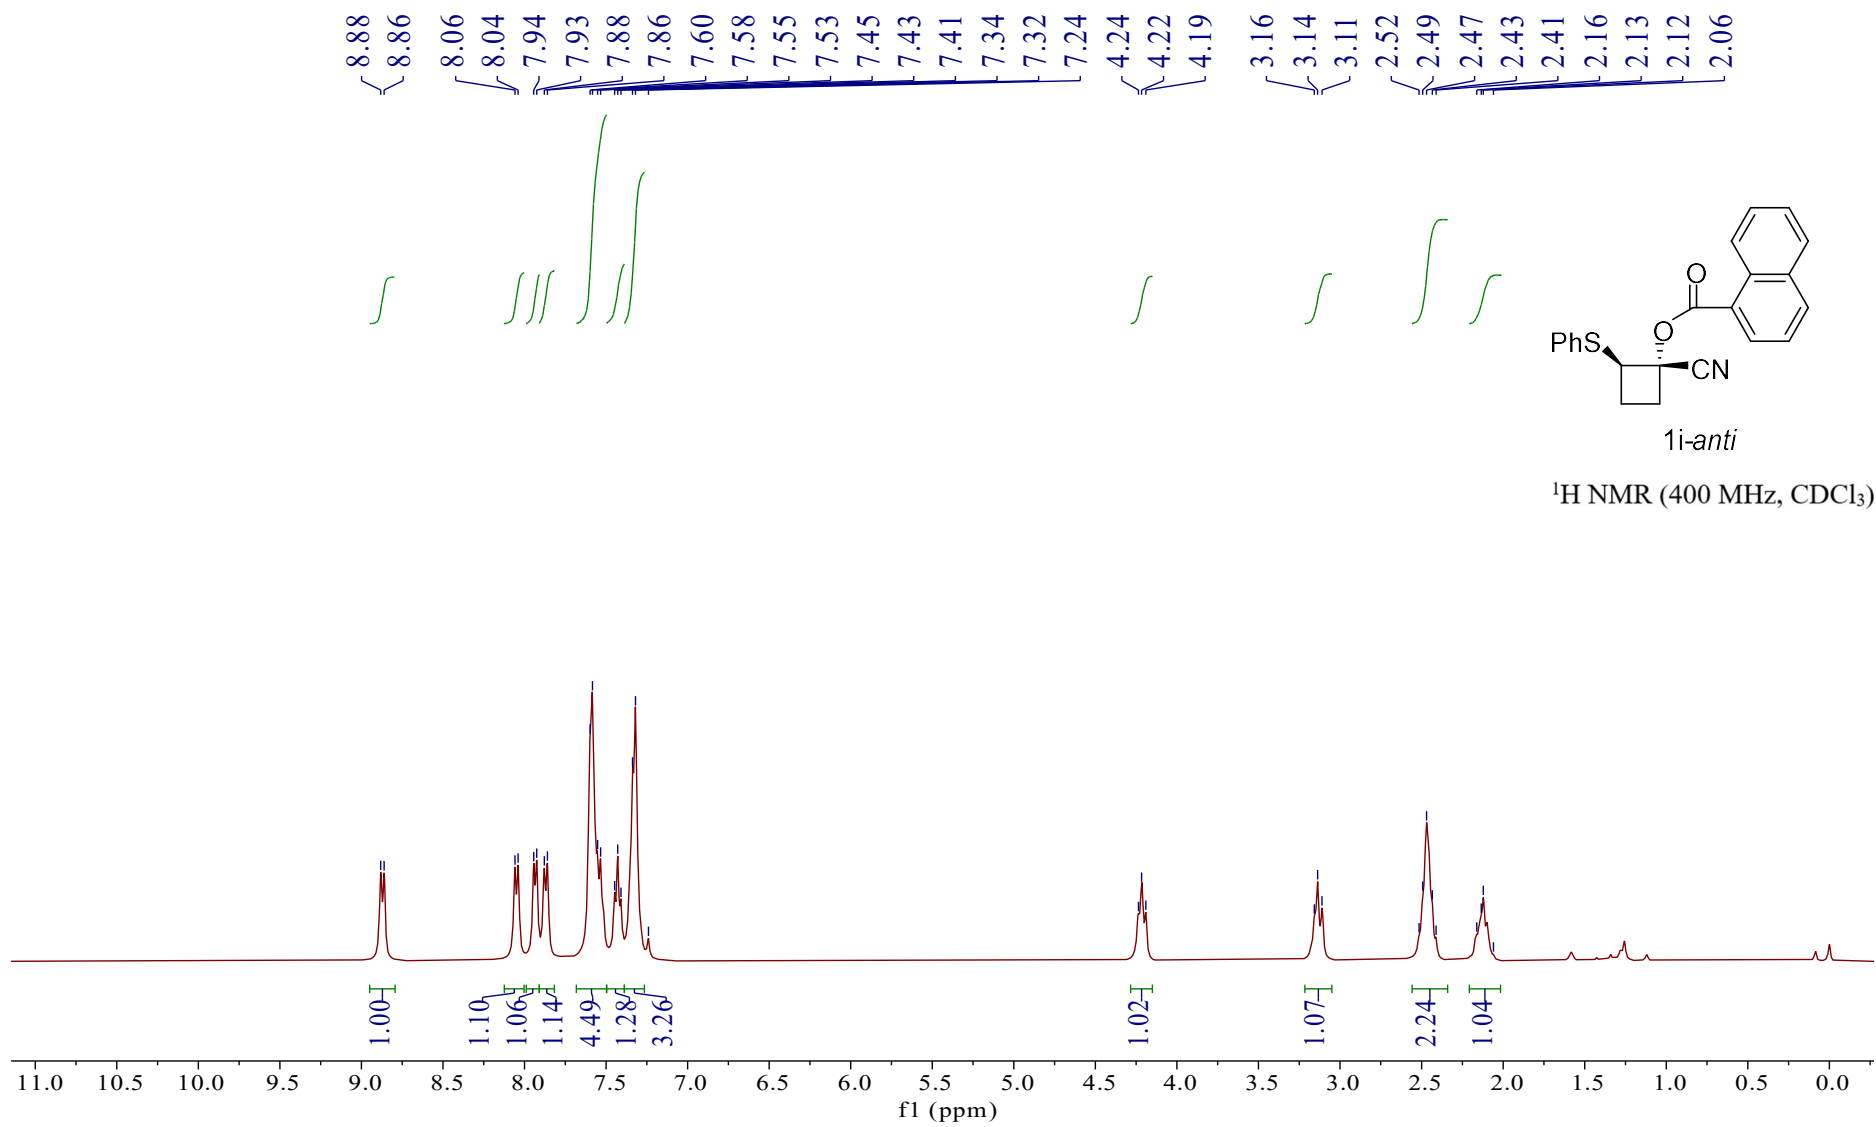

NMR-34

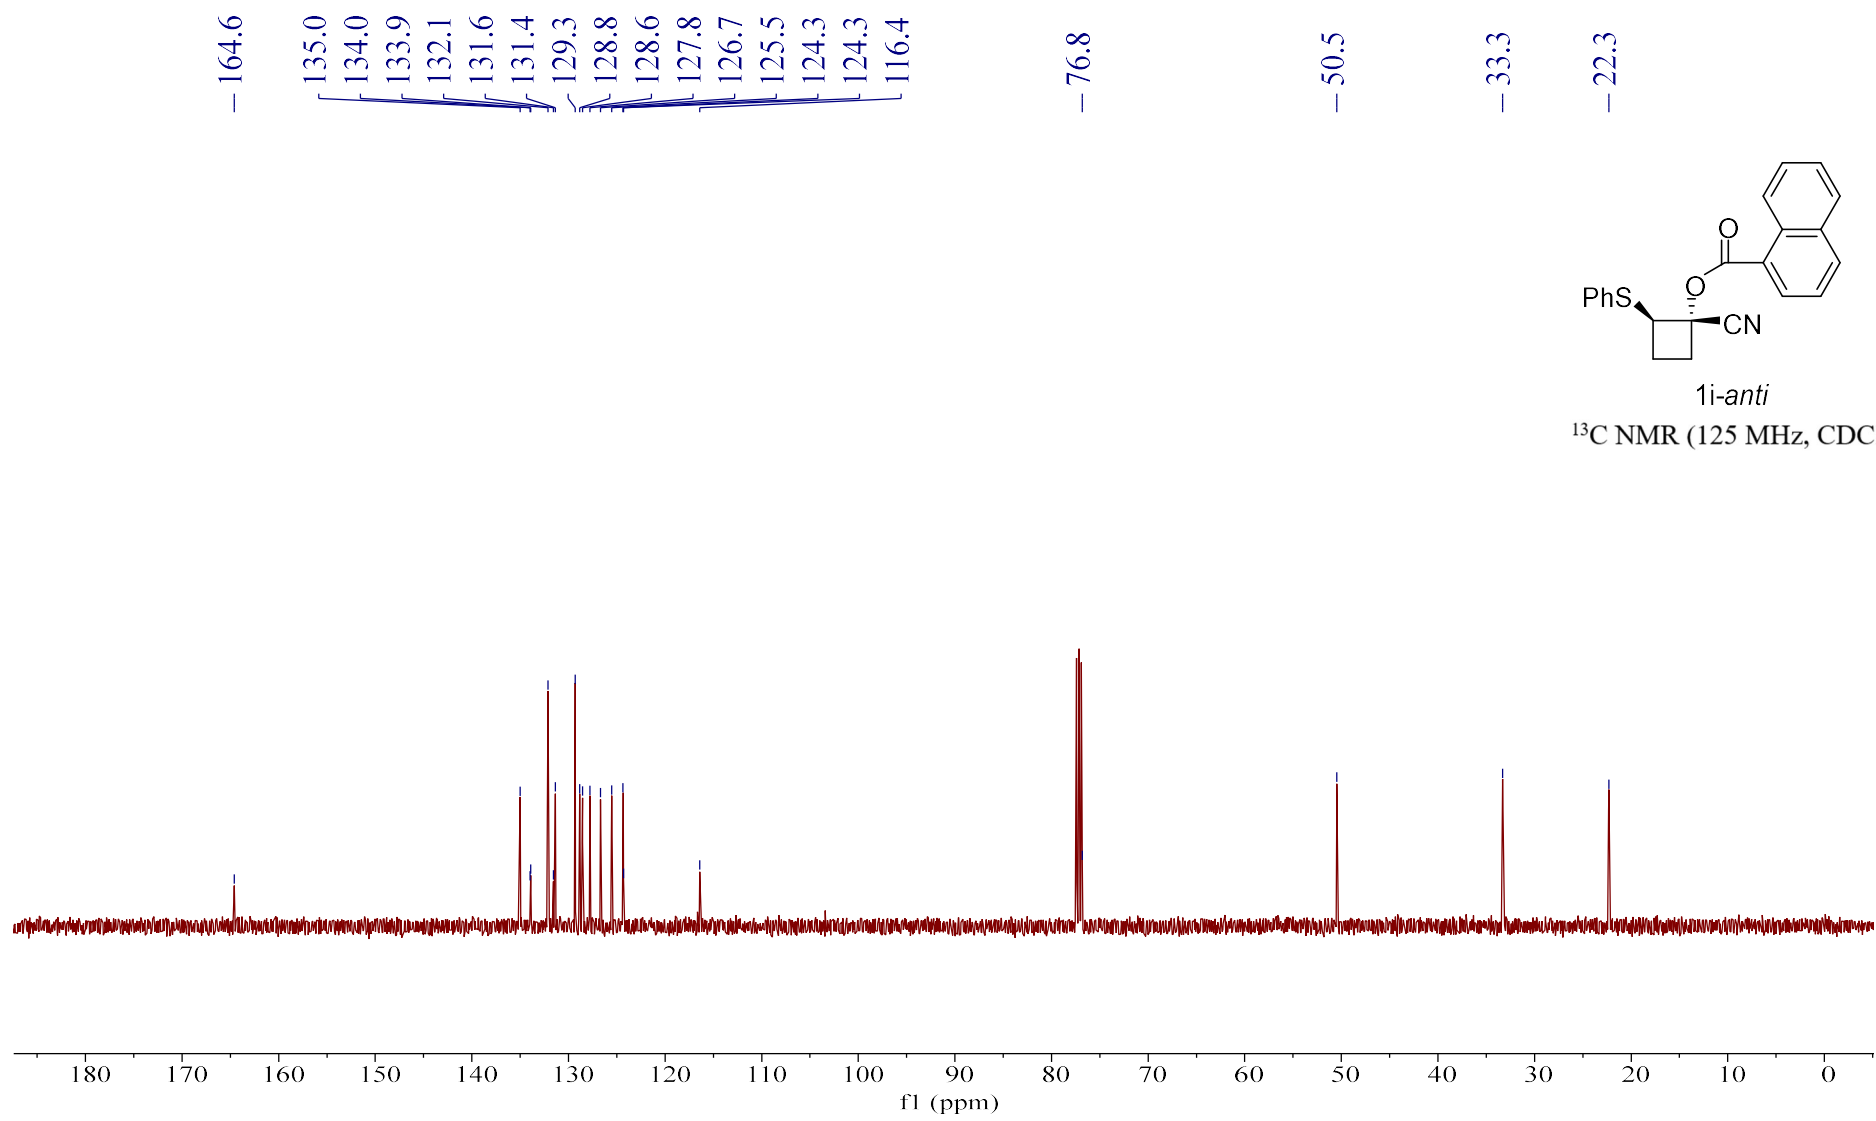

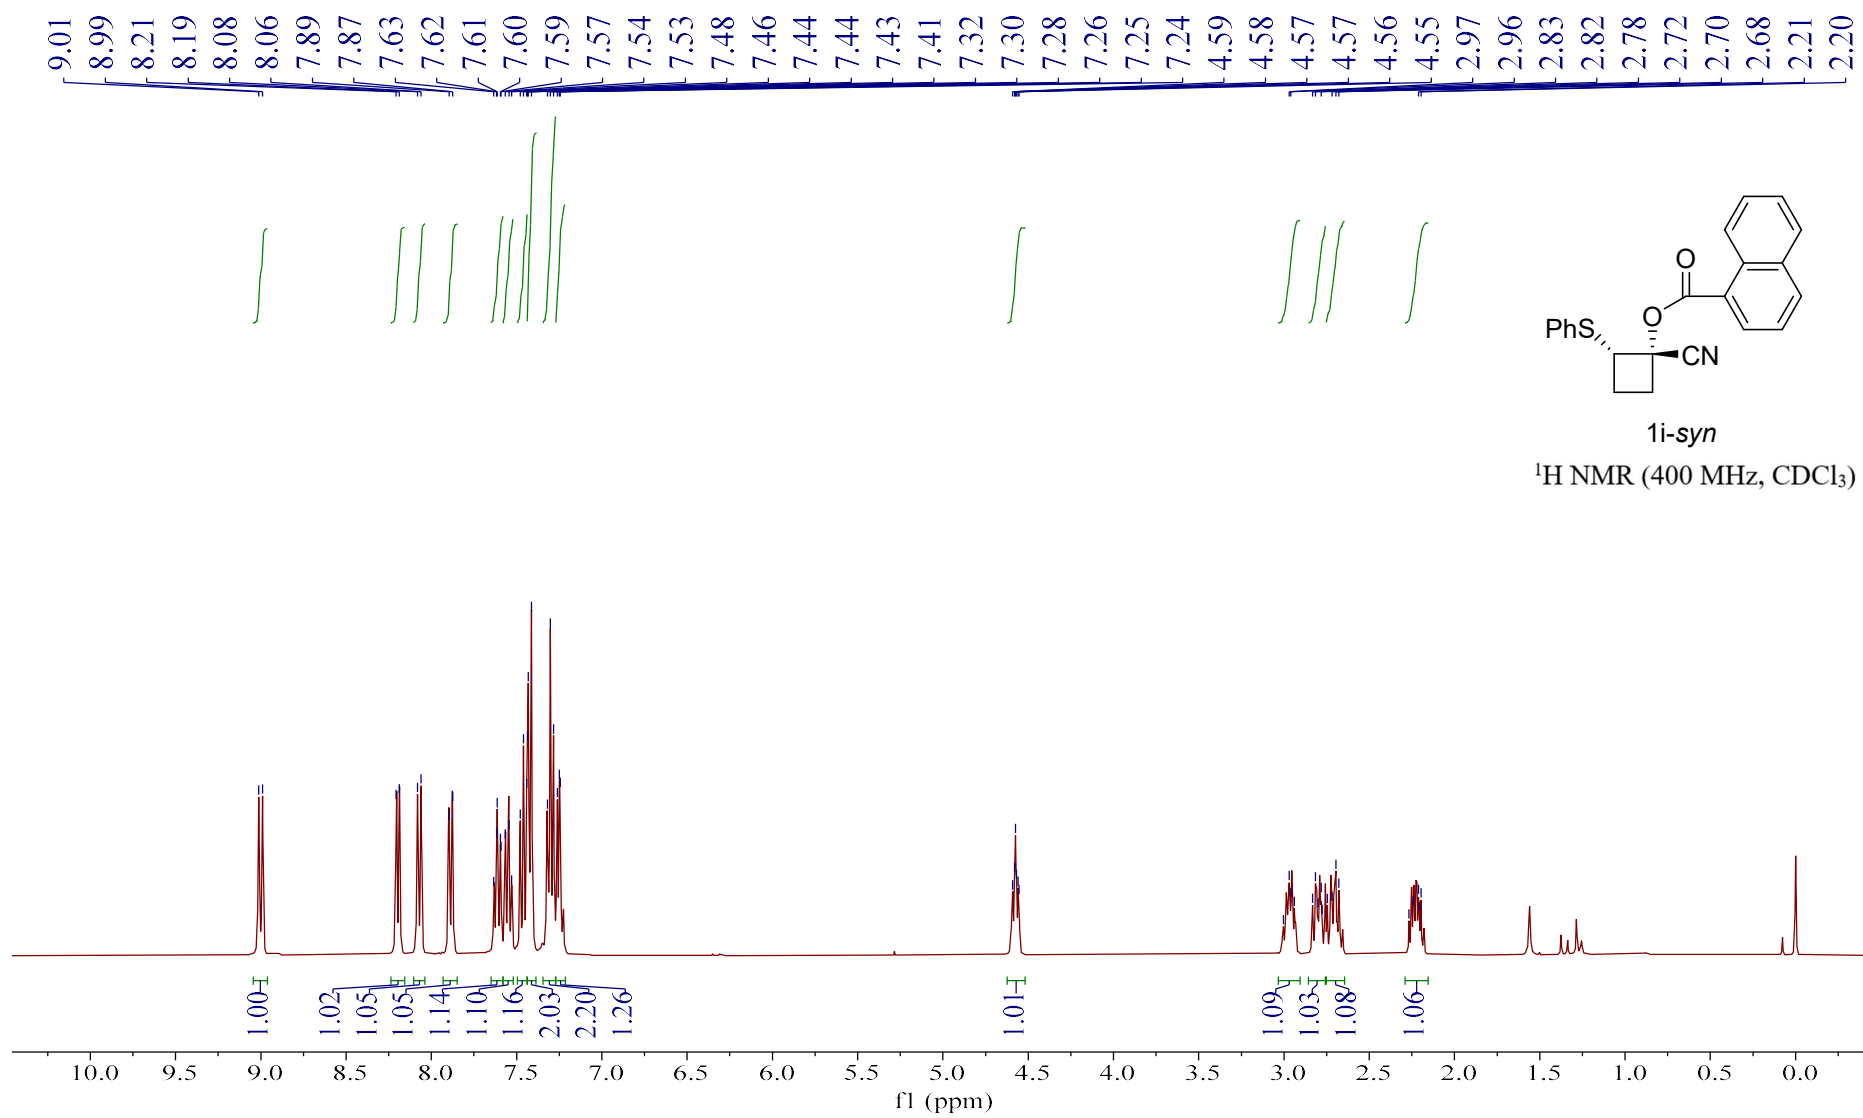



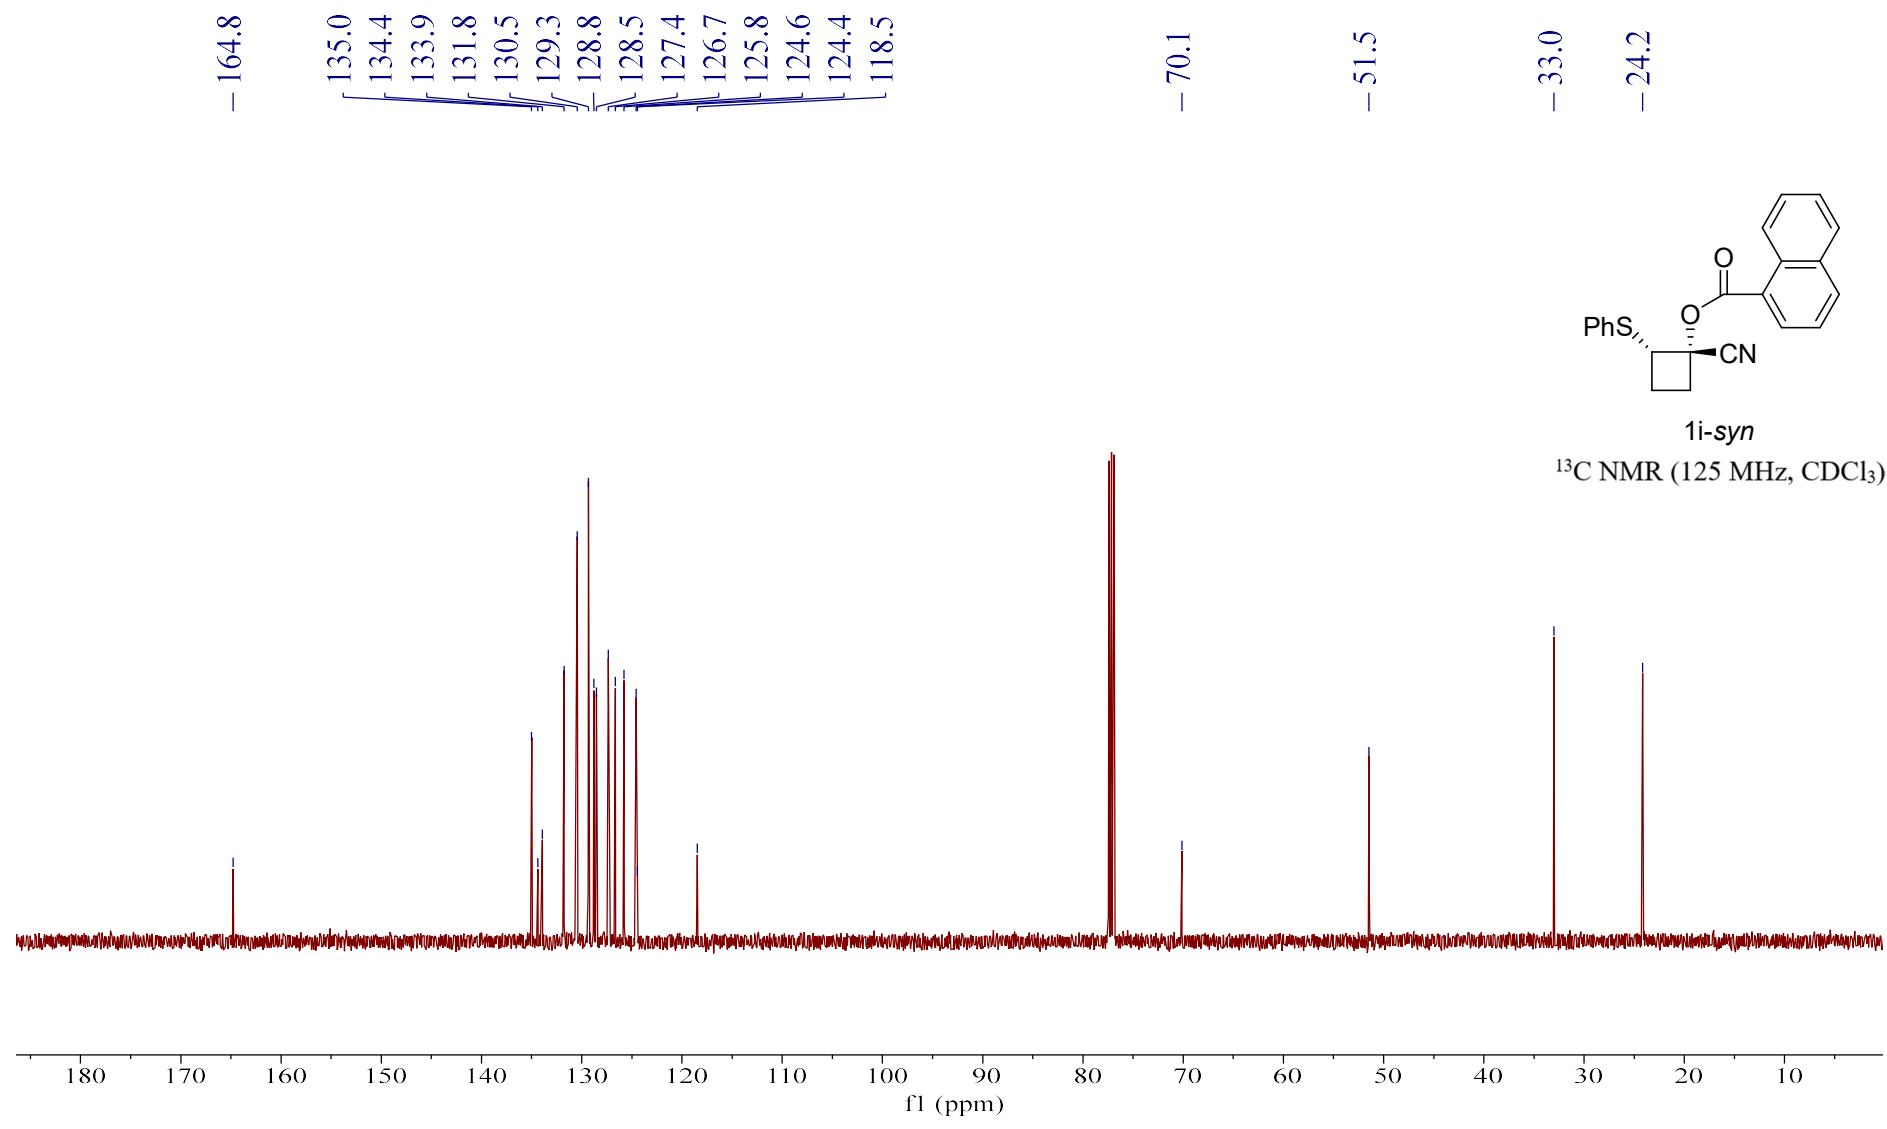

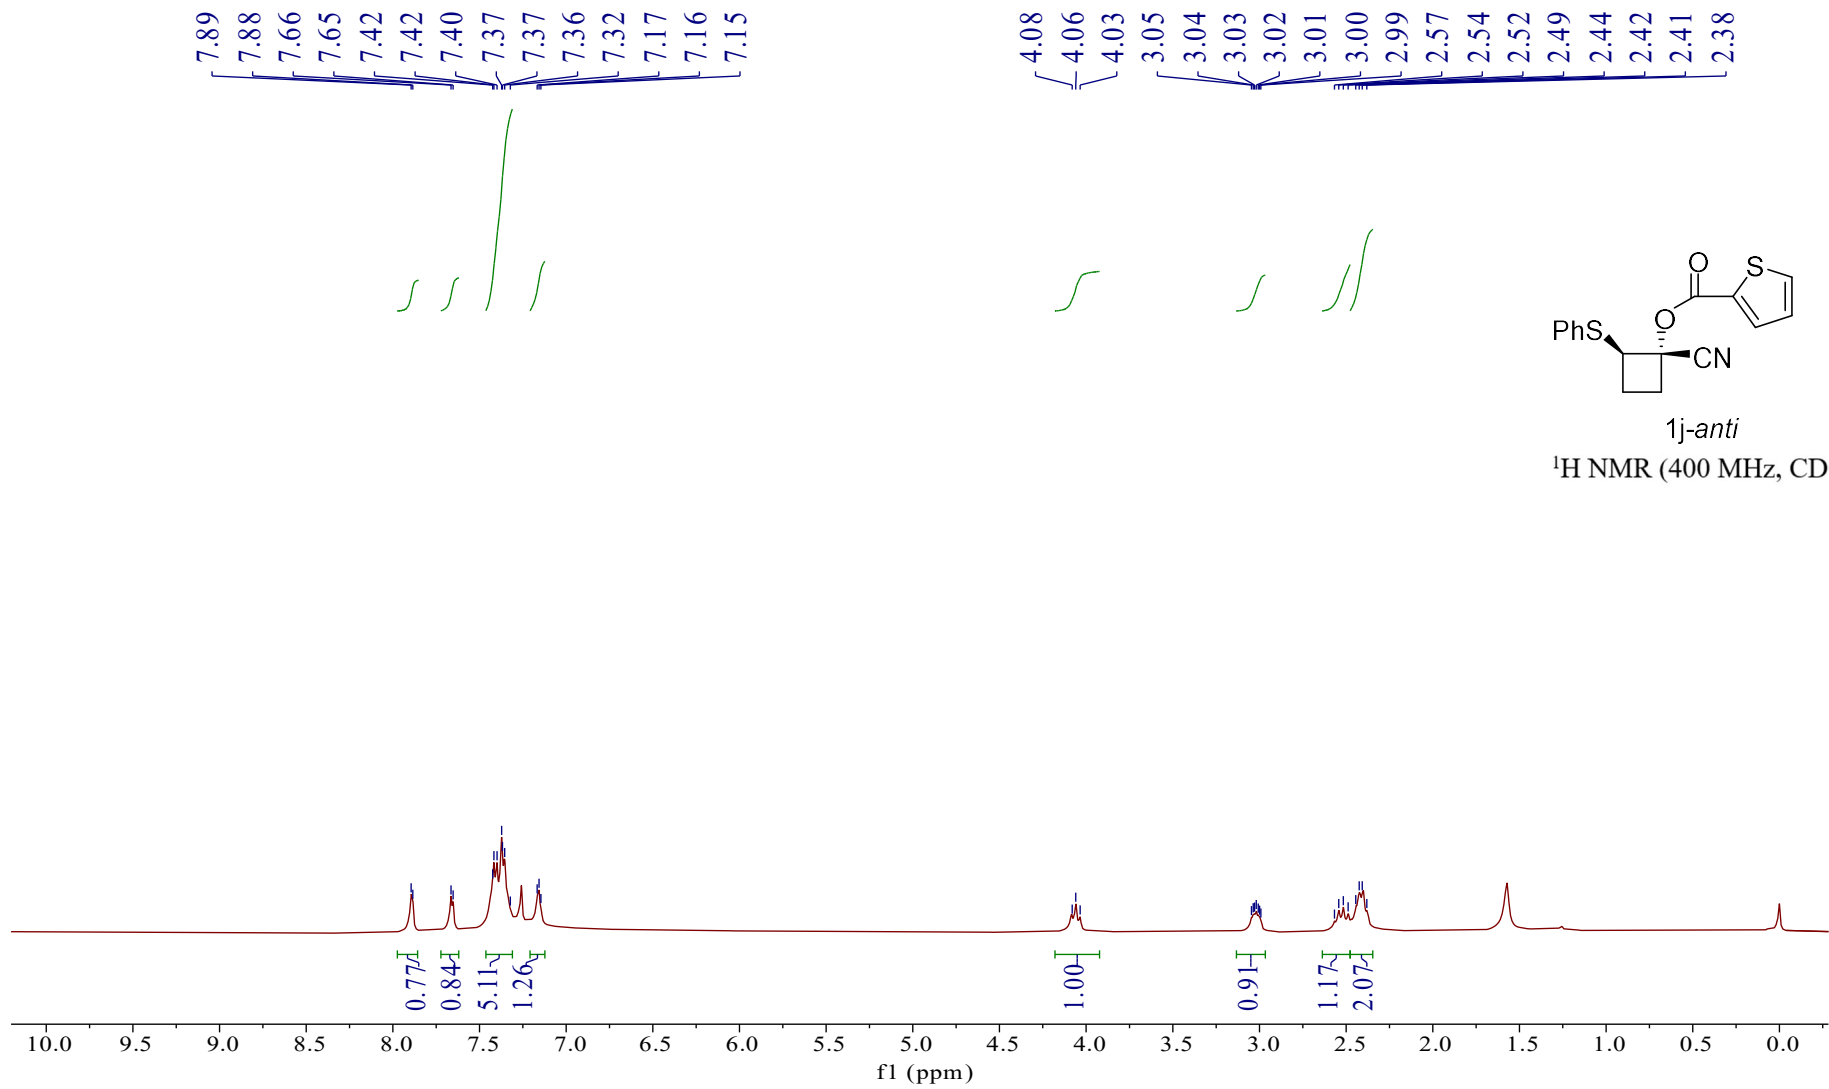

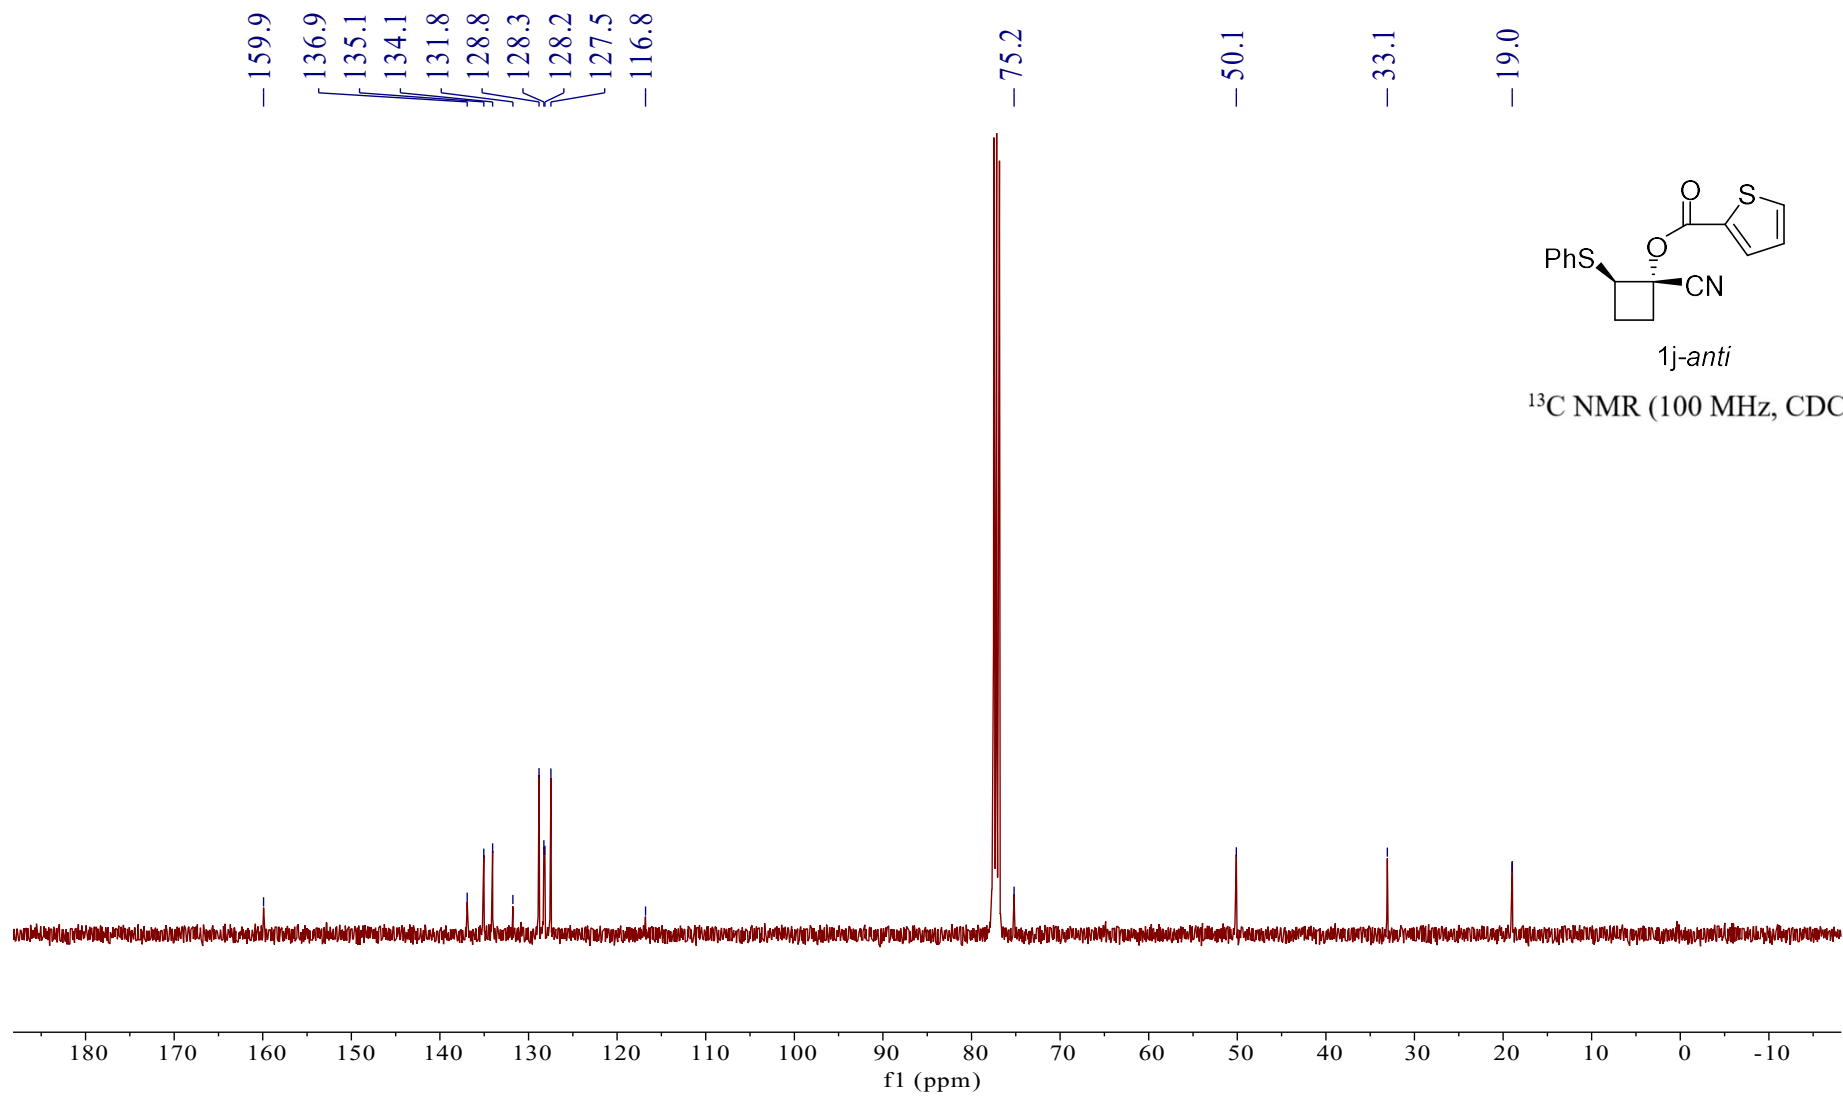

NMR-39

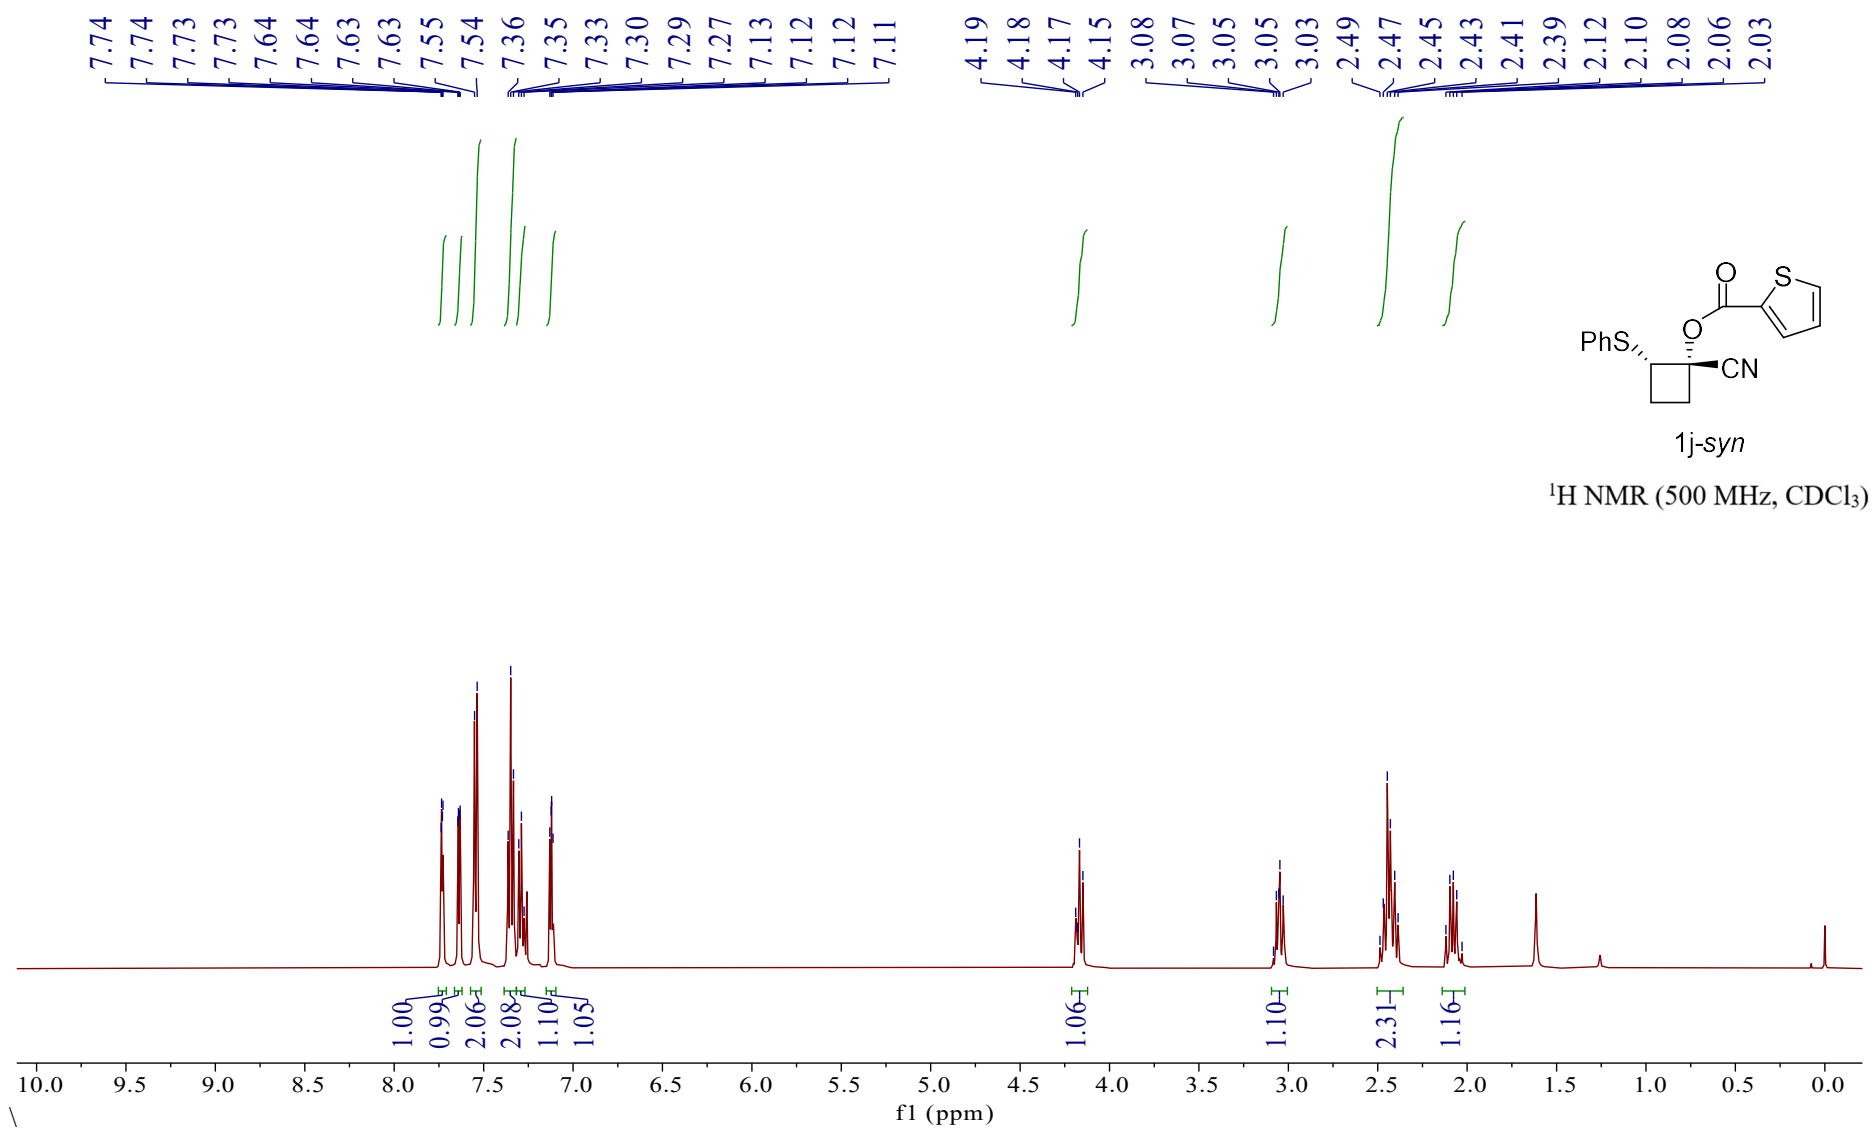

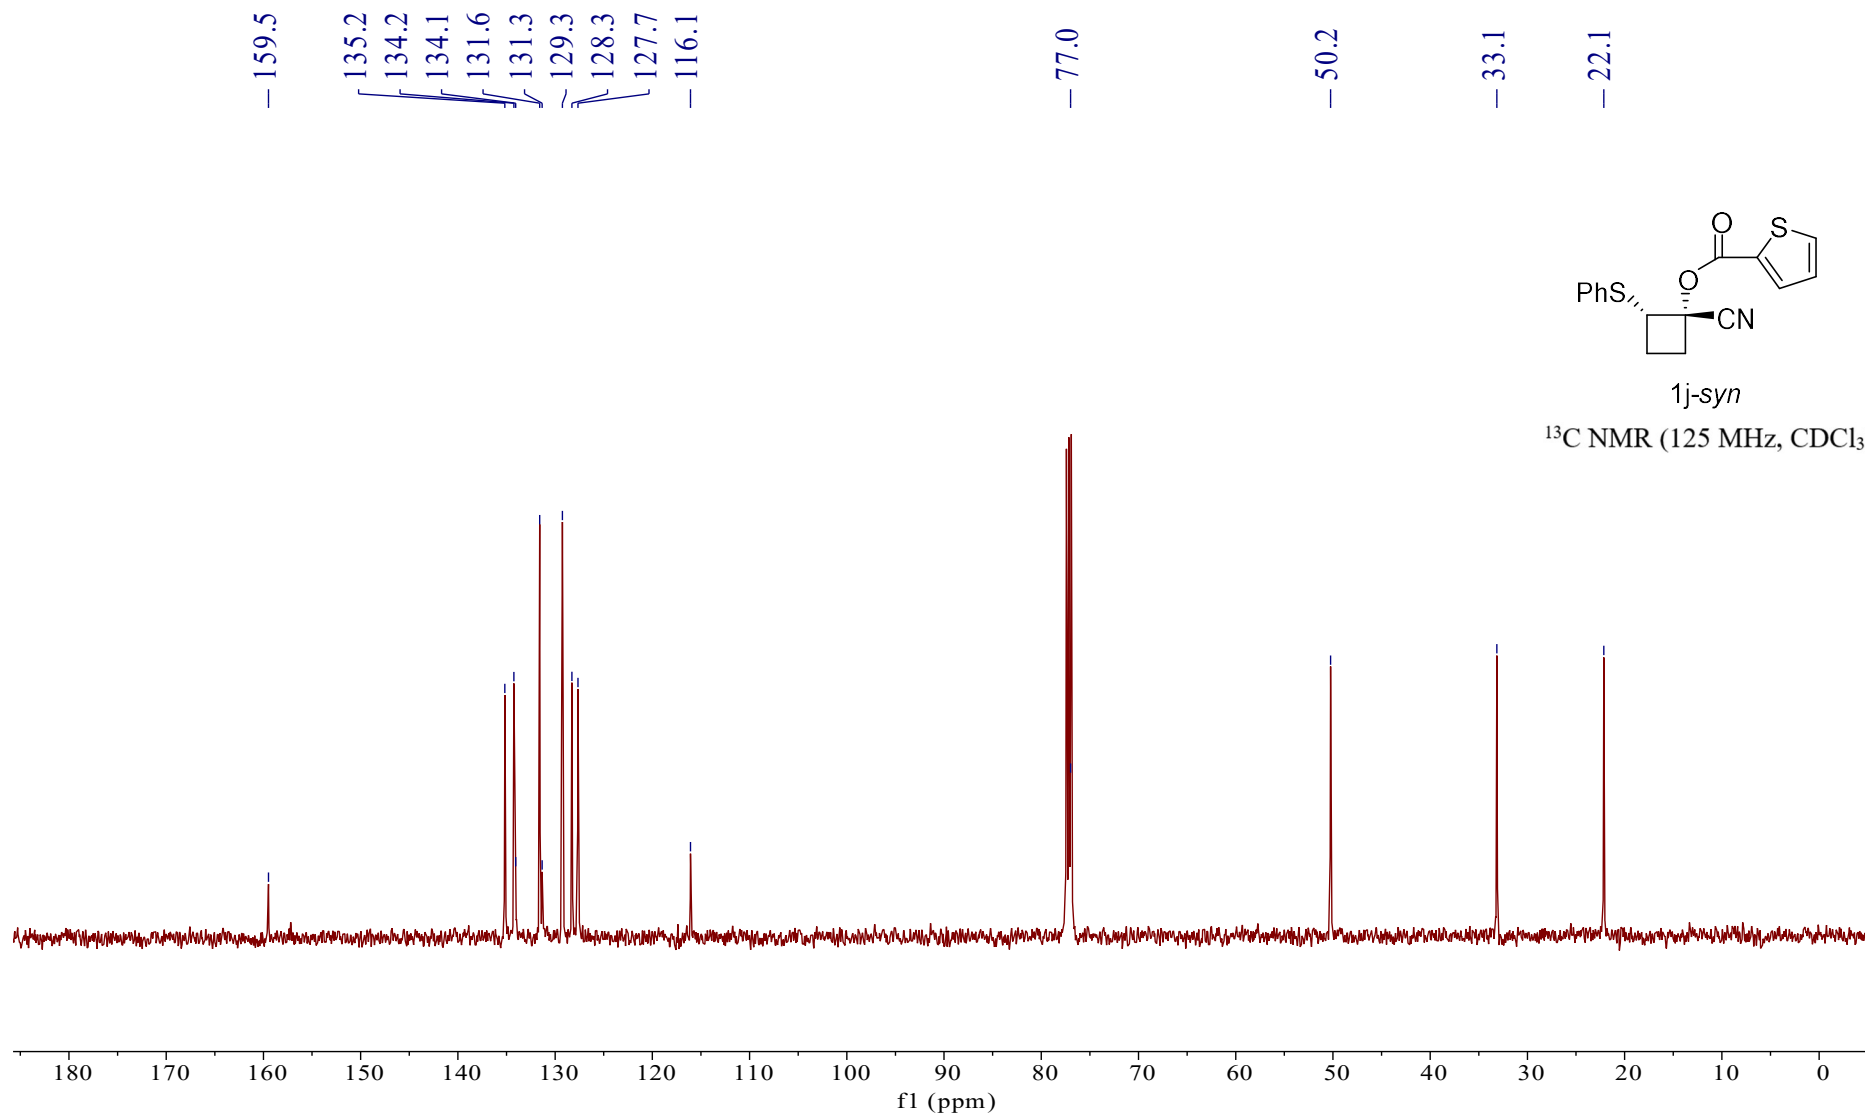

NMR-41

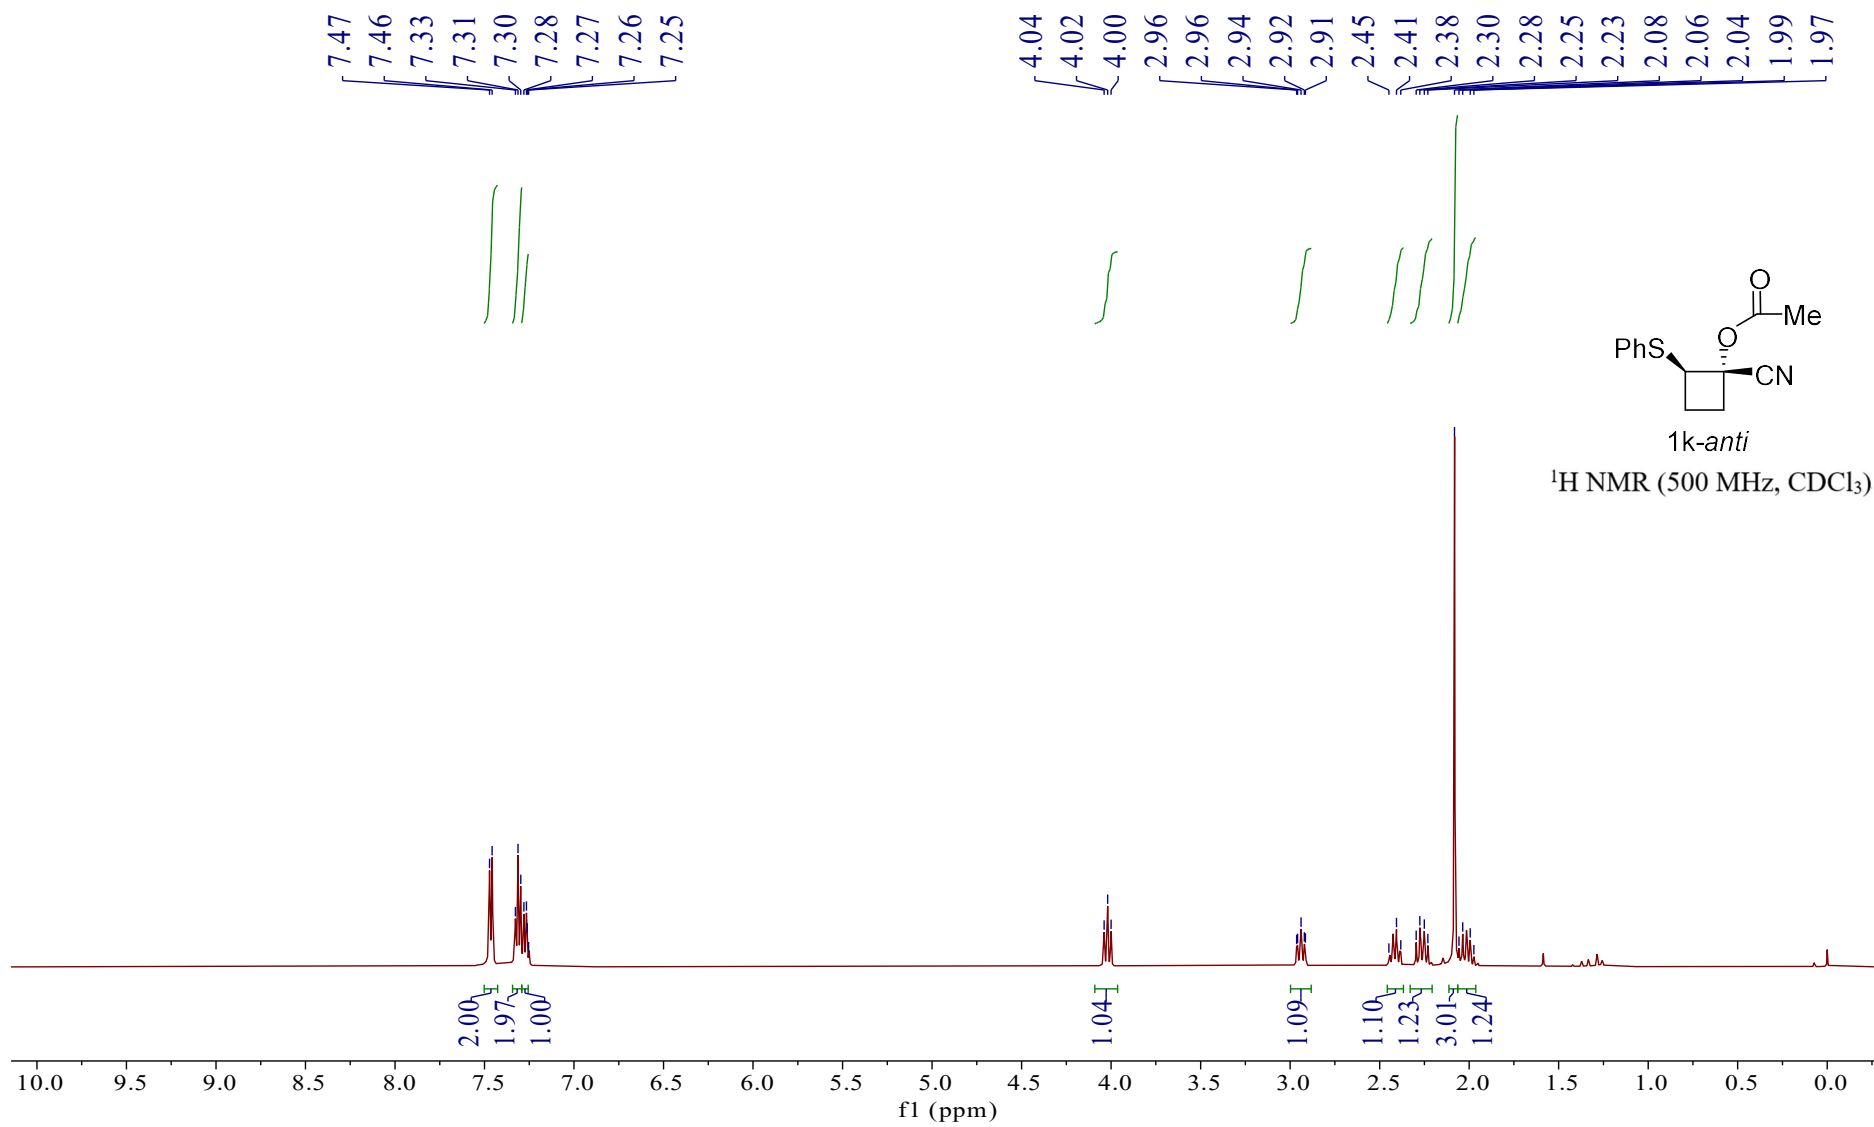

NMR-42

-168.4

133.9

131.6

129.2

127.6

-116.2

-76.1

-49.8

-32.9

22.5

20.6

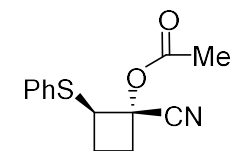

1k-anti

<sup>13</sup>C NMR (125 MHz, CDCl<sub>3</sub>)

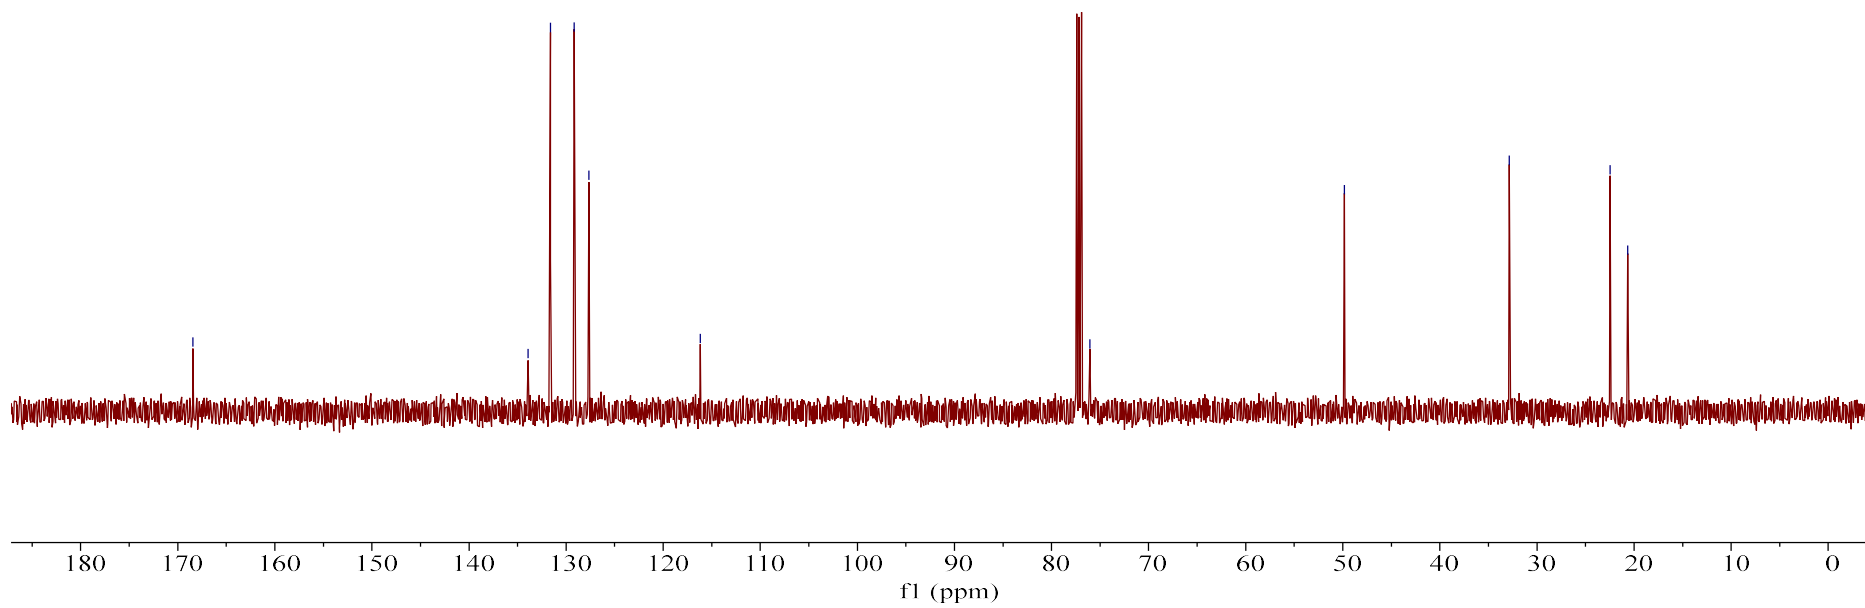

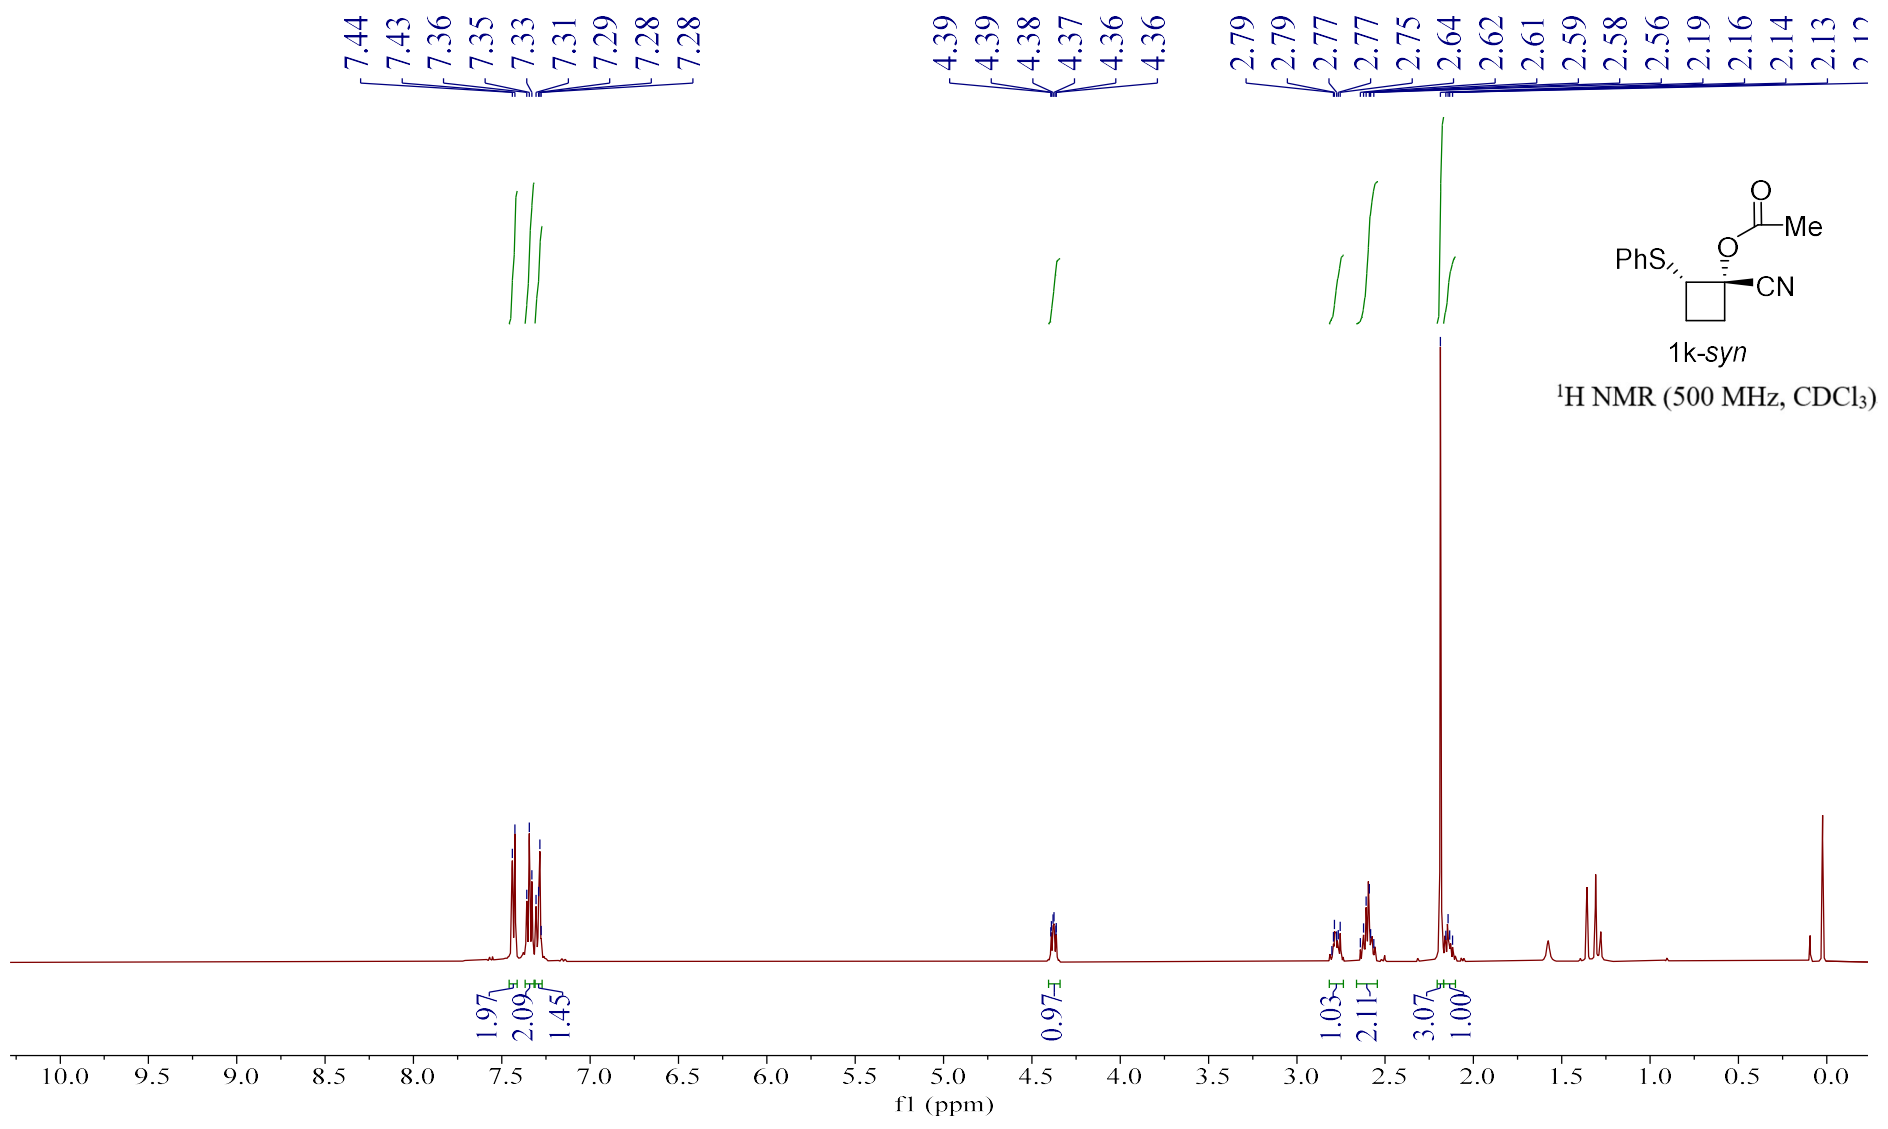



-168.7

134.0

131.2

129.3

127.7

-118.2

-69.9

-51.6

32.6

24.3

20.7

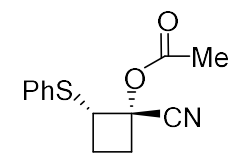

1k-syn

<sup>13</sup>C NMR (125 MHz, CDCl<sub>3</sub>)

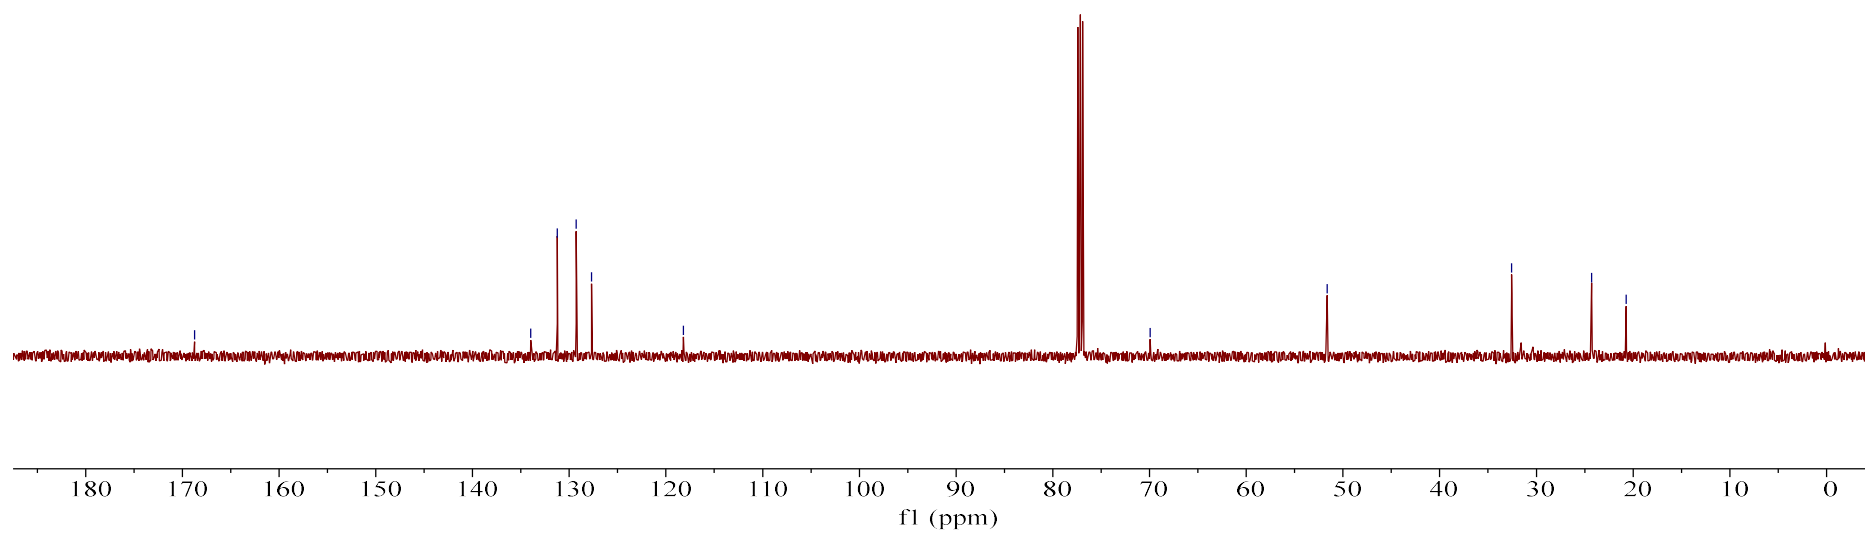

NMR-45

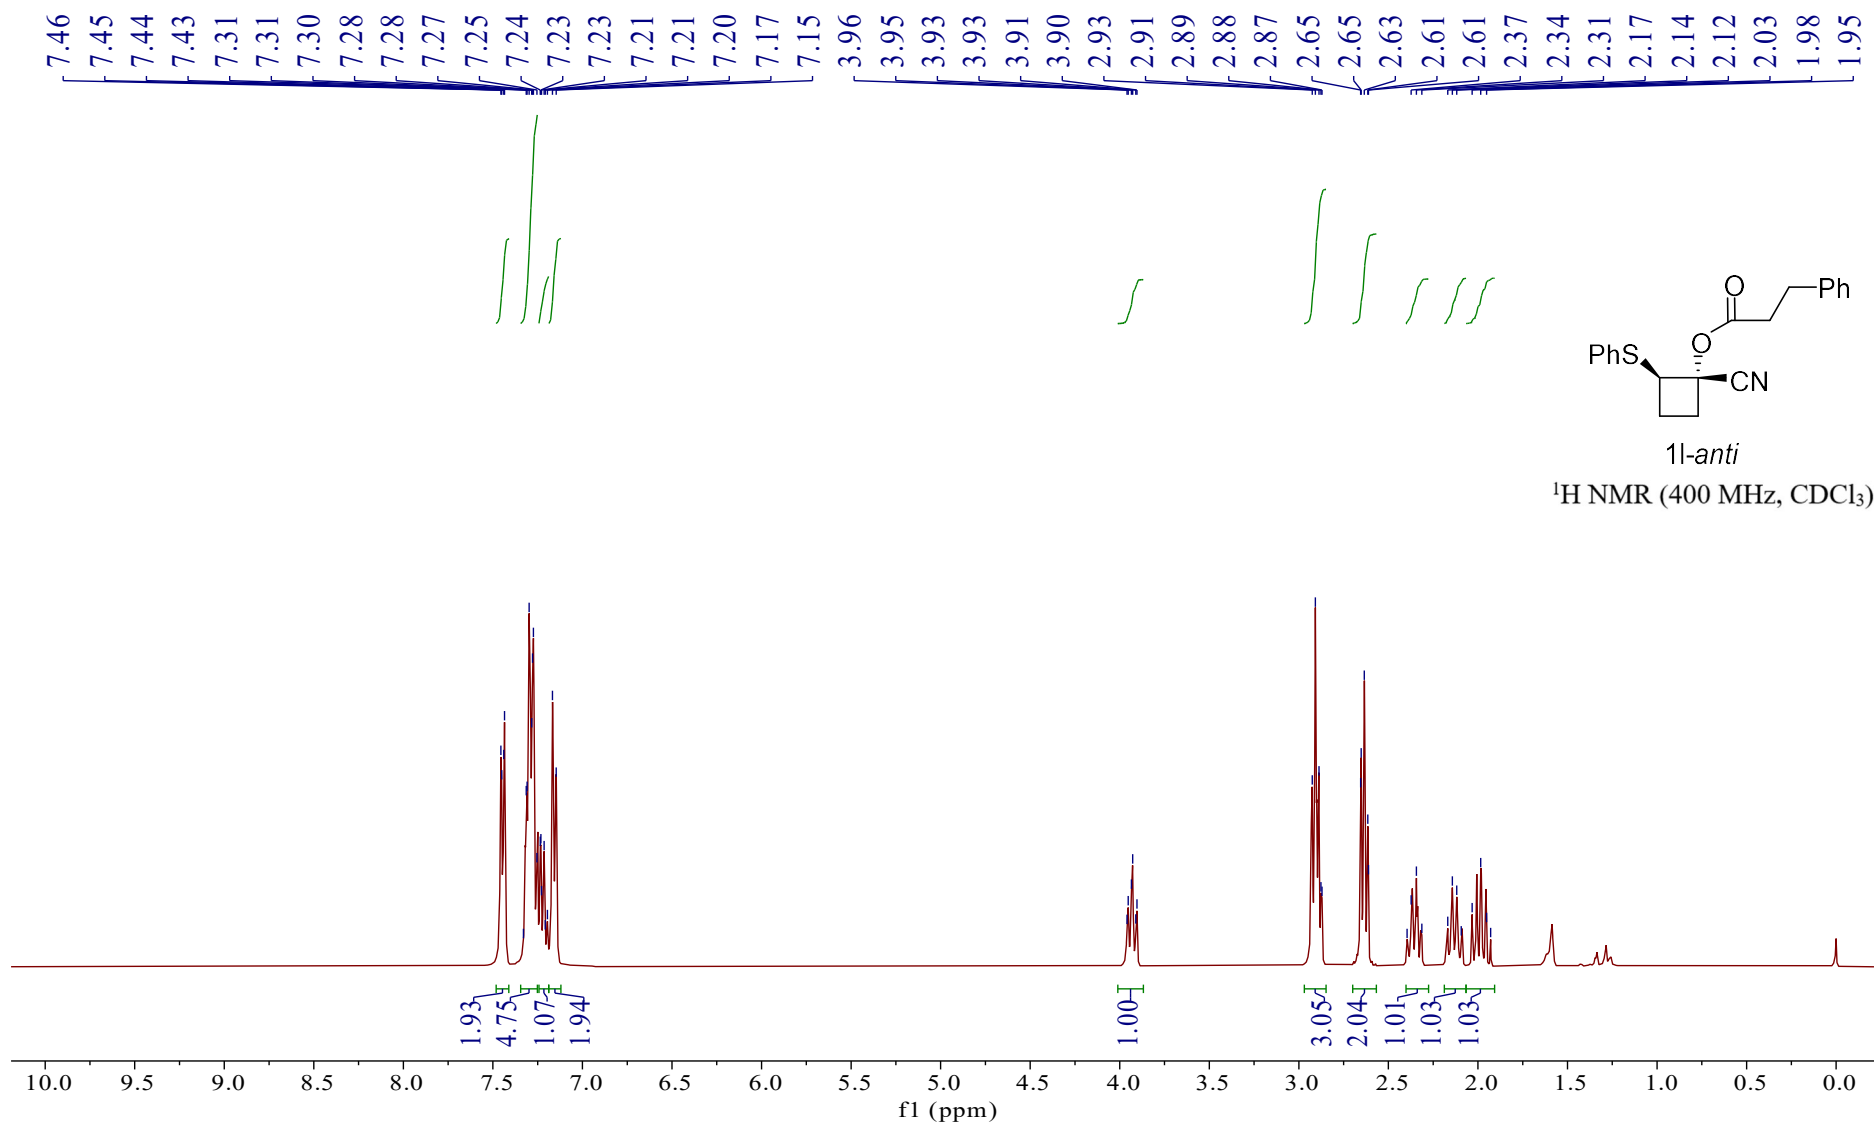

NMR-46

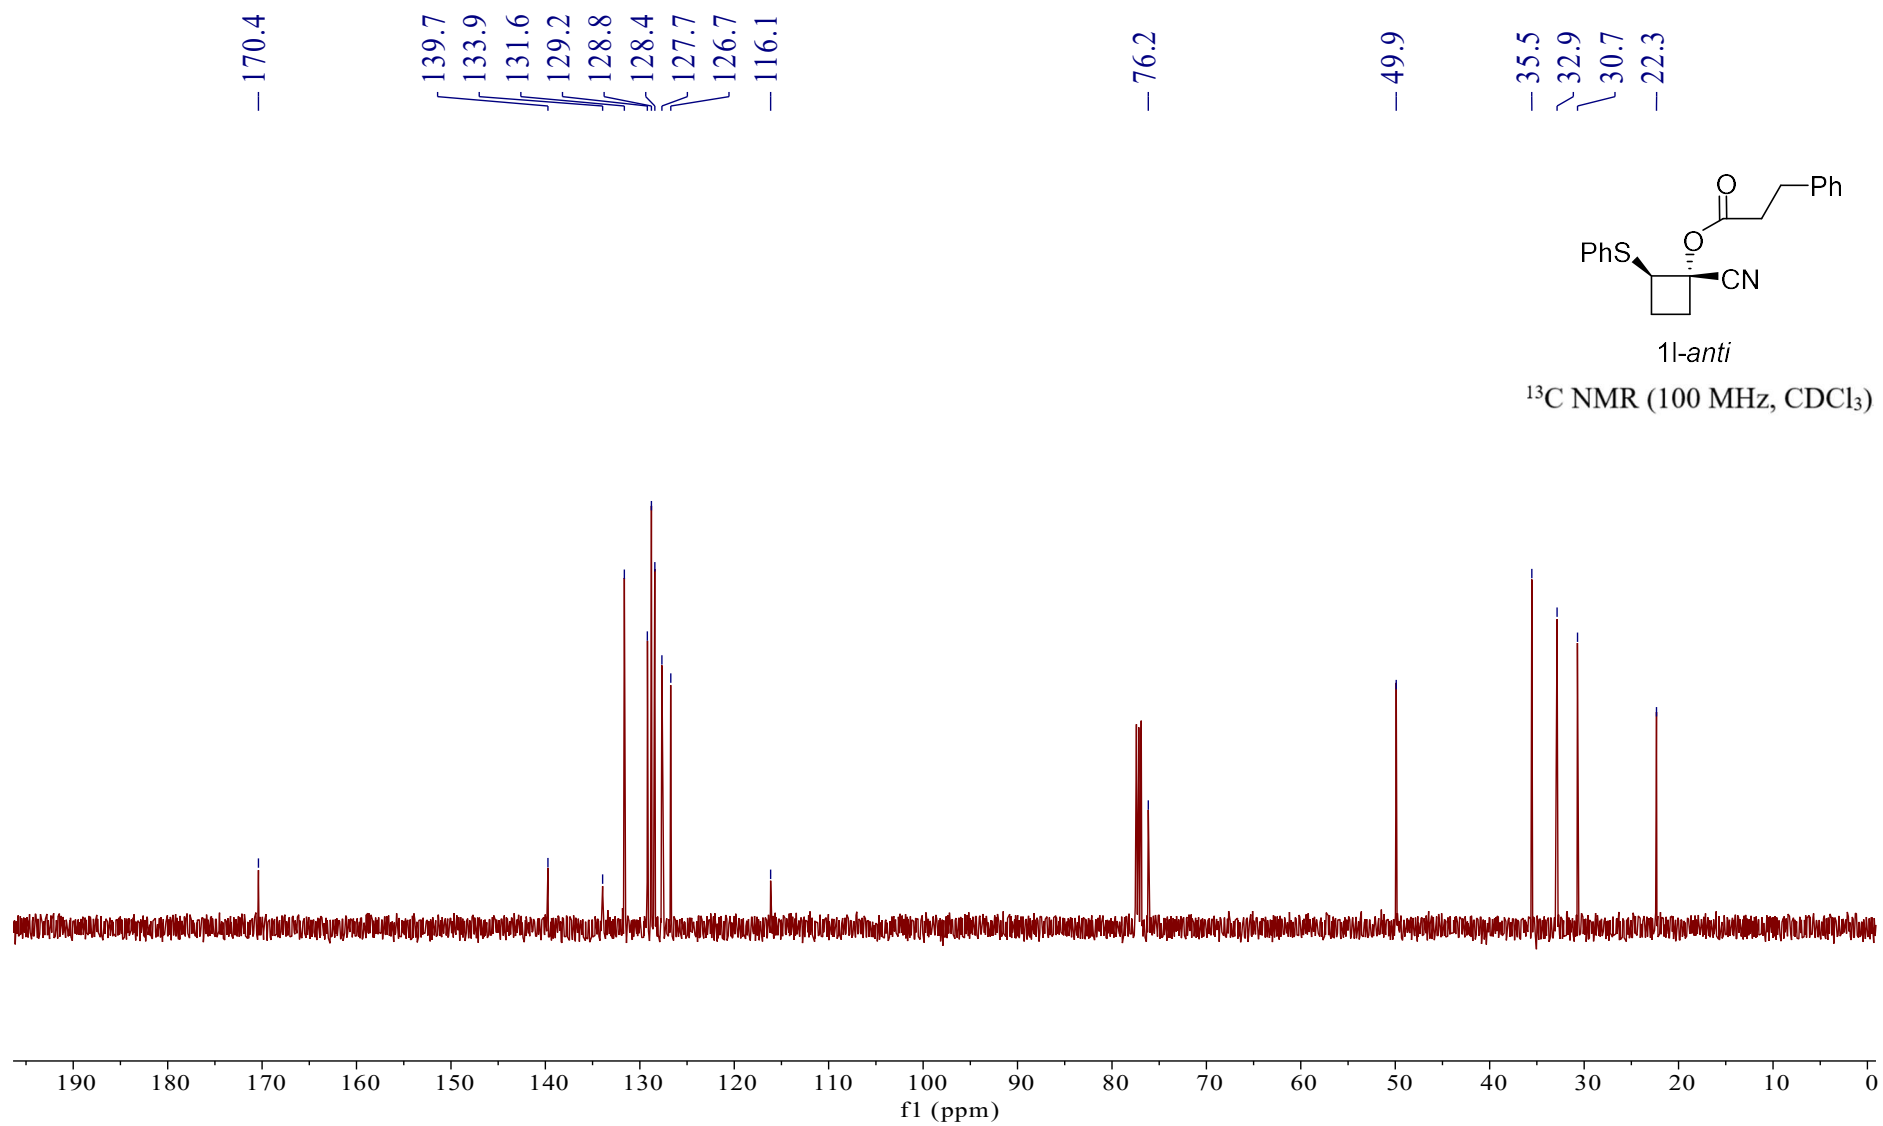

NMR-47

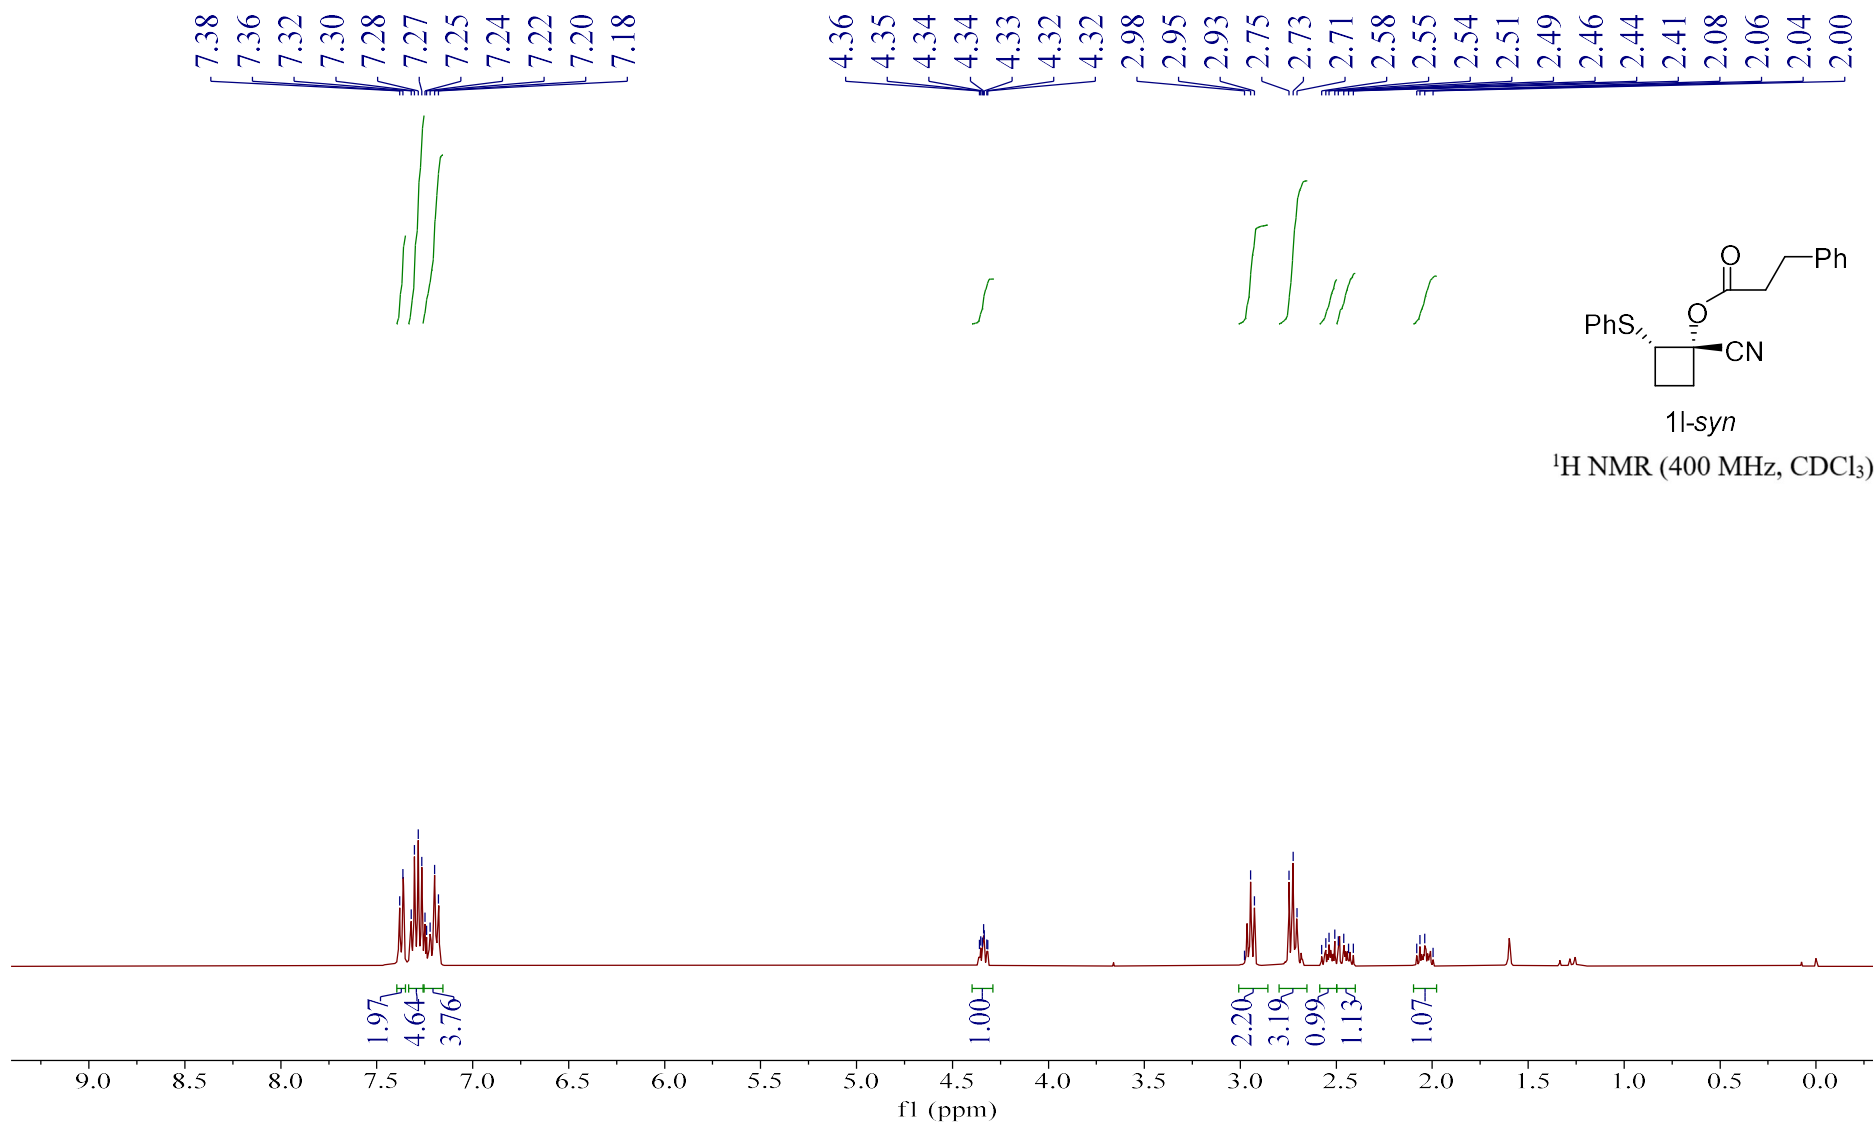

NMR-48

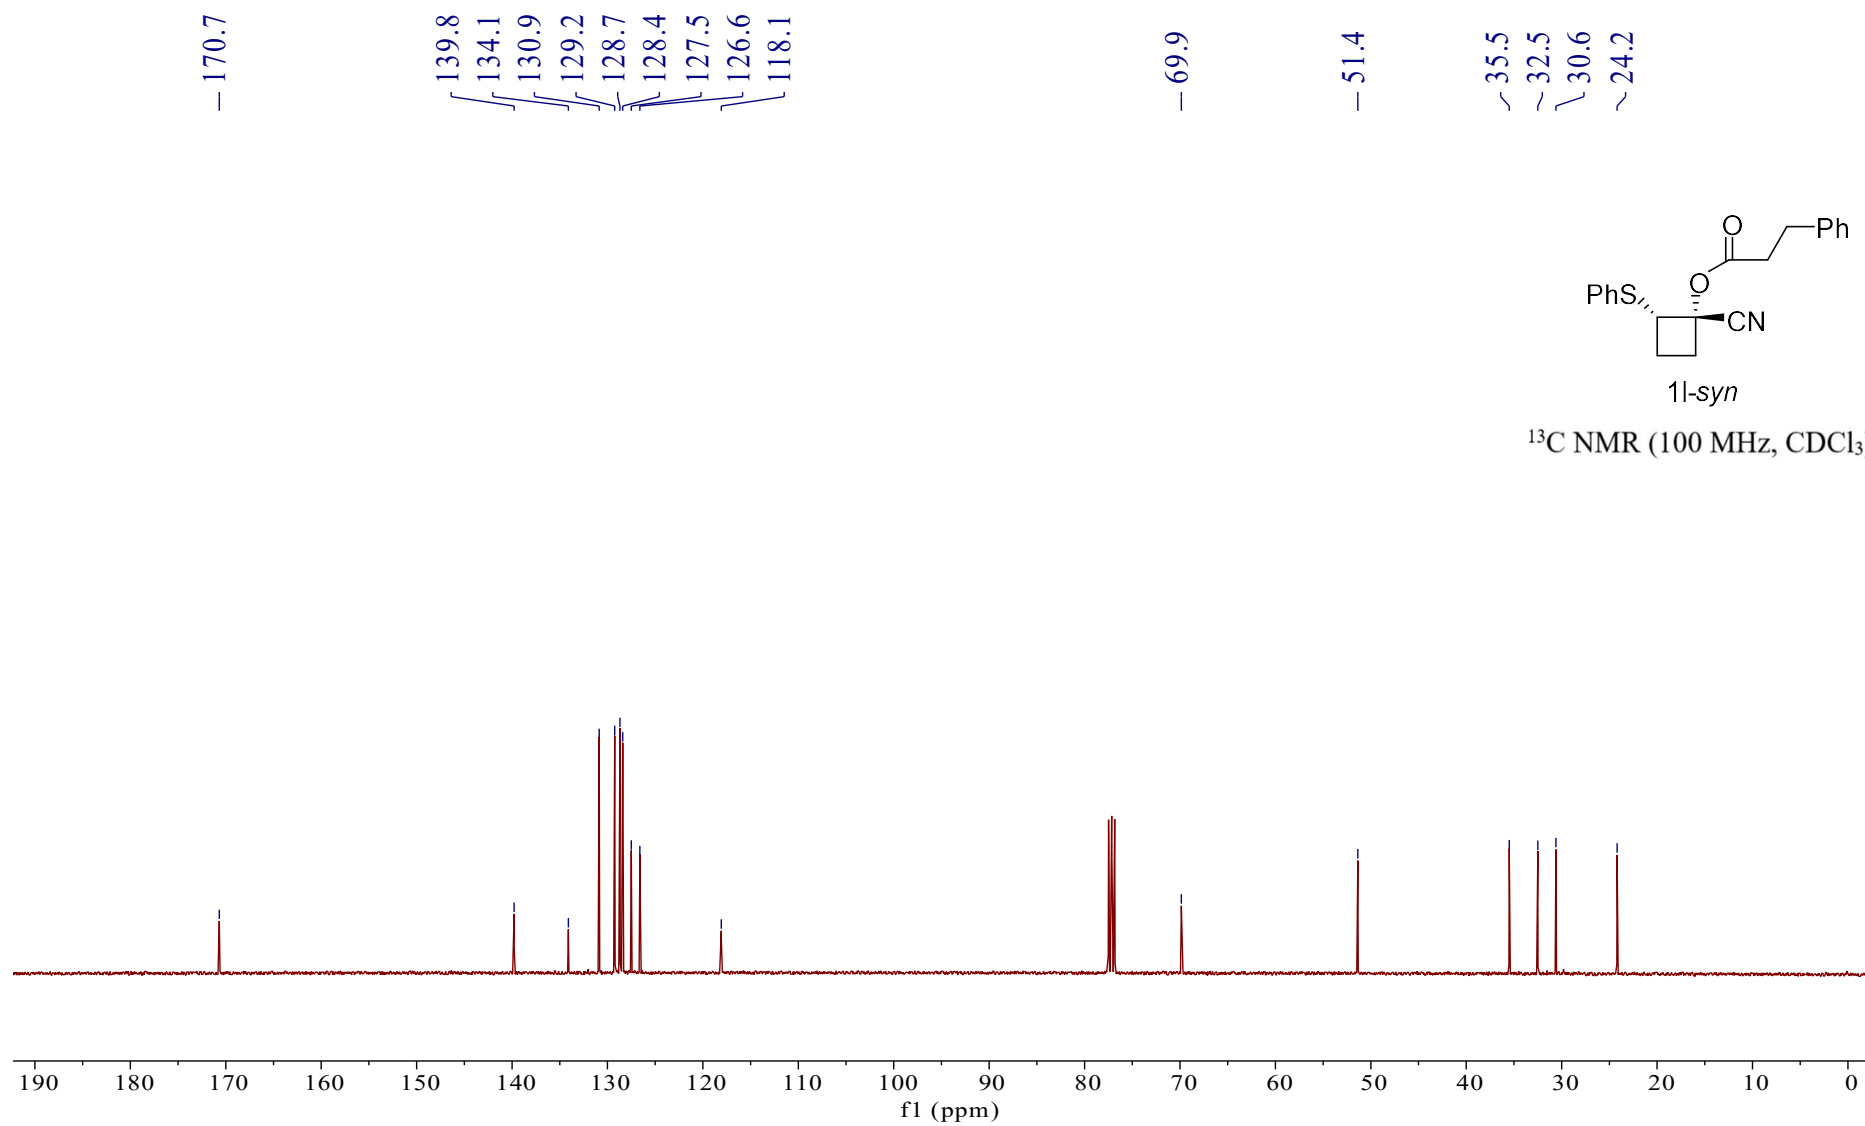

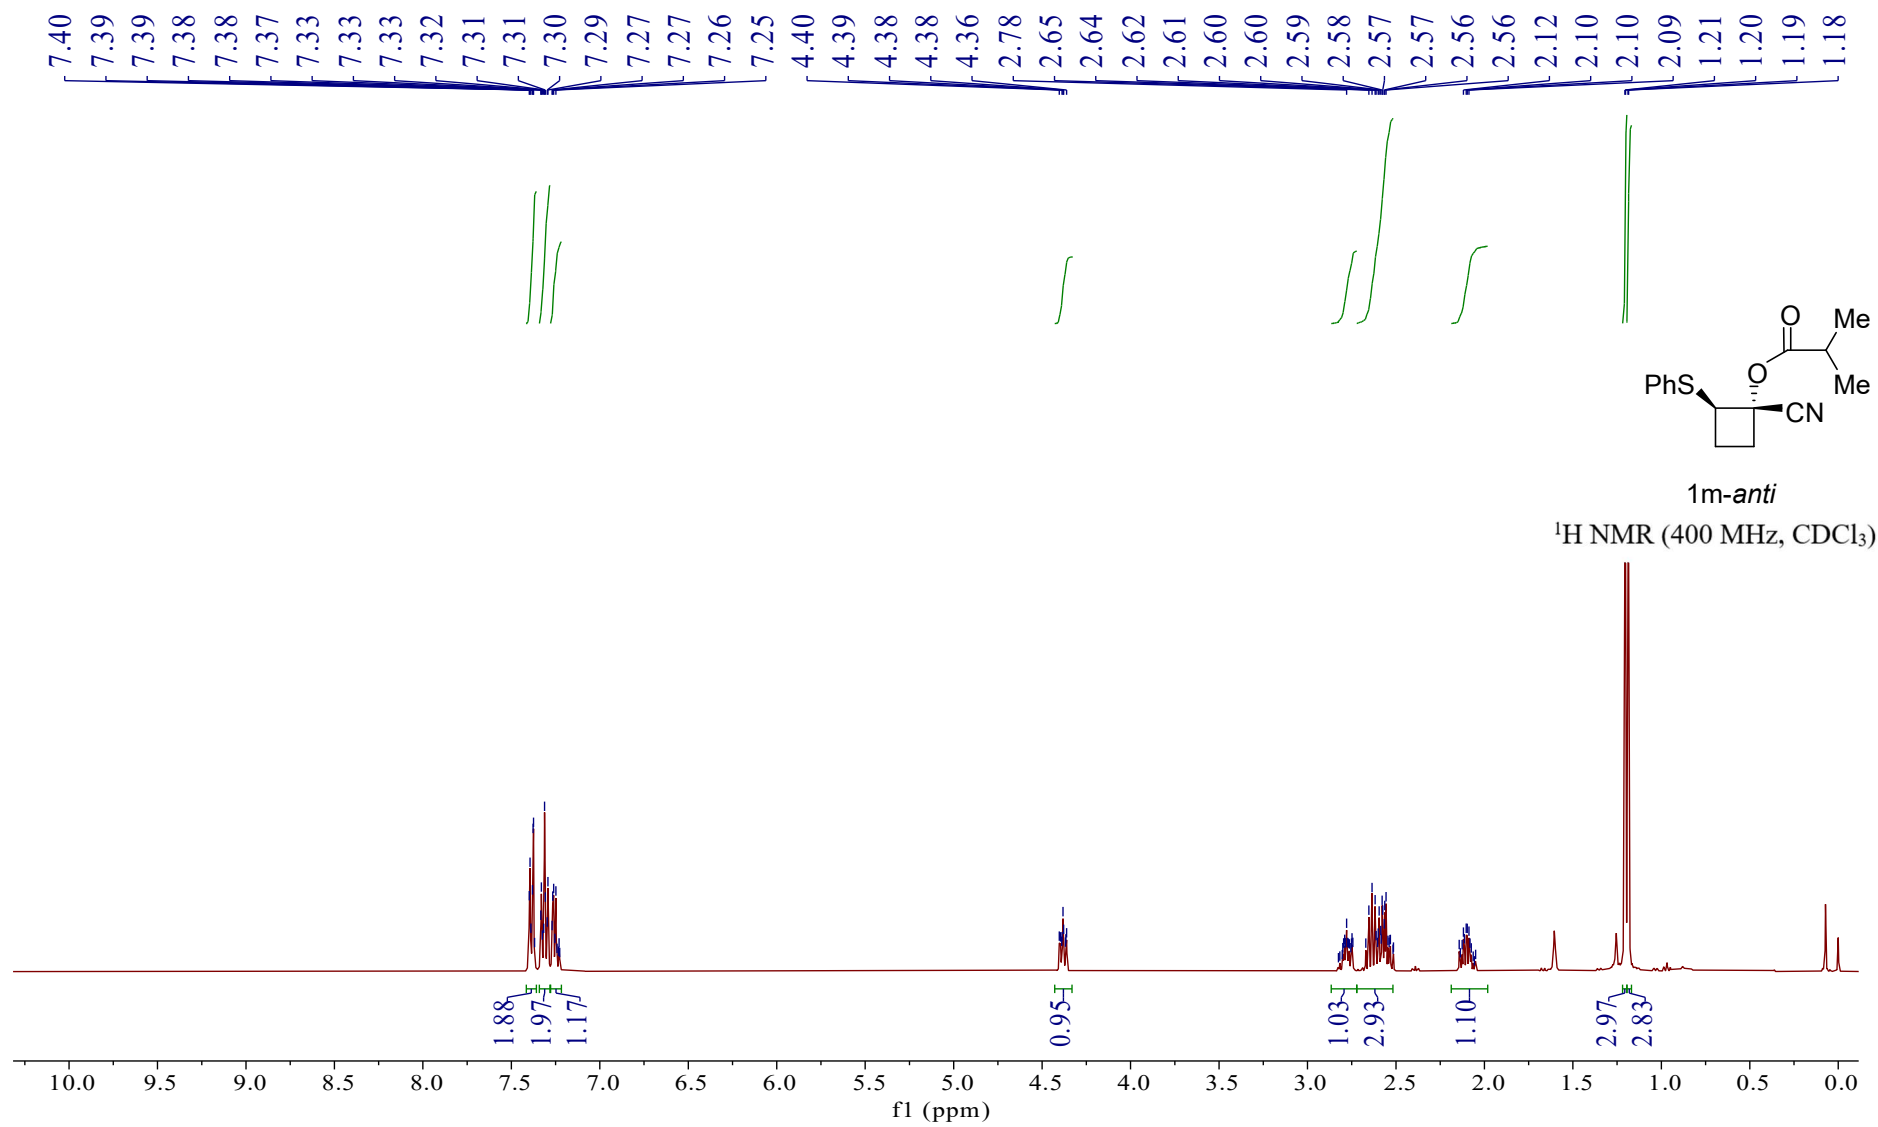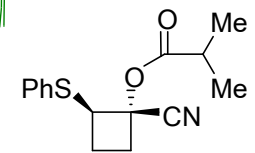

1m-anti

<sup>1</sup>H NMR (400 MHz, CDCl<sub>3</sub>)

- 174.8

134.3  
130.6  
129.2  
127.4  
- 118.3

- 69.5

- 51.4

33.9  
32.7  
- 24.2  
18.7

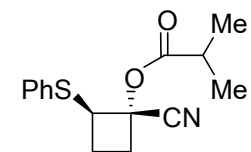

1m-anti

<sup>13</sup>C NMR (100 MHz, CDCl<sub>3</sub>)

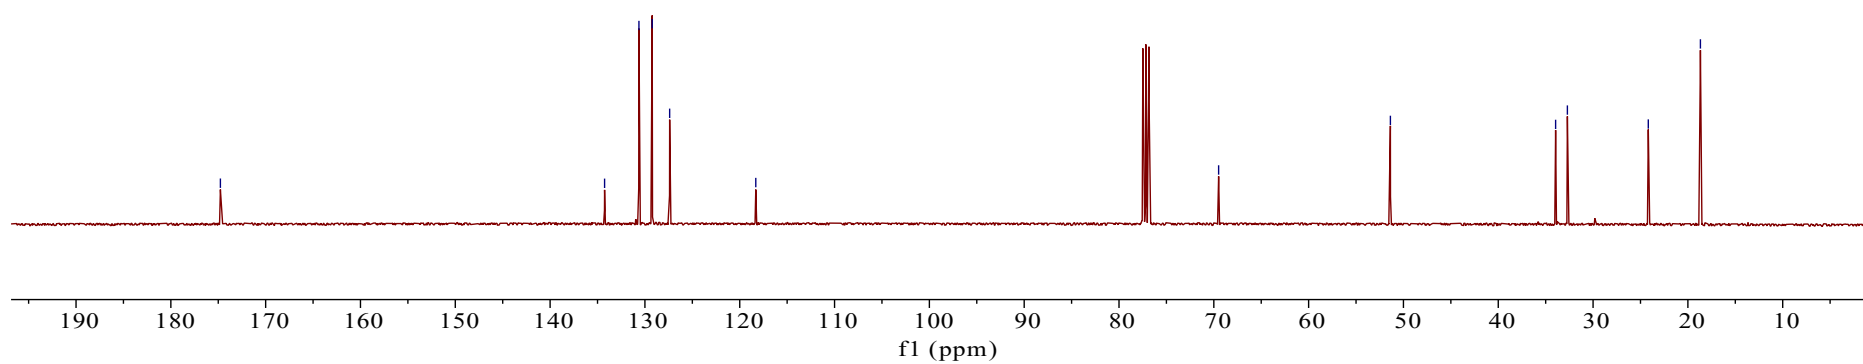

NMR-51

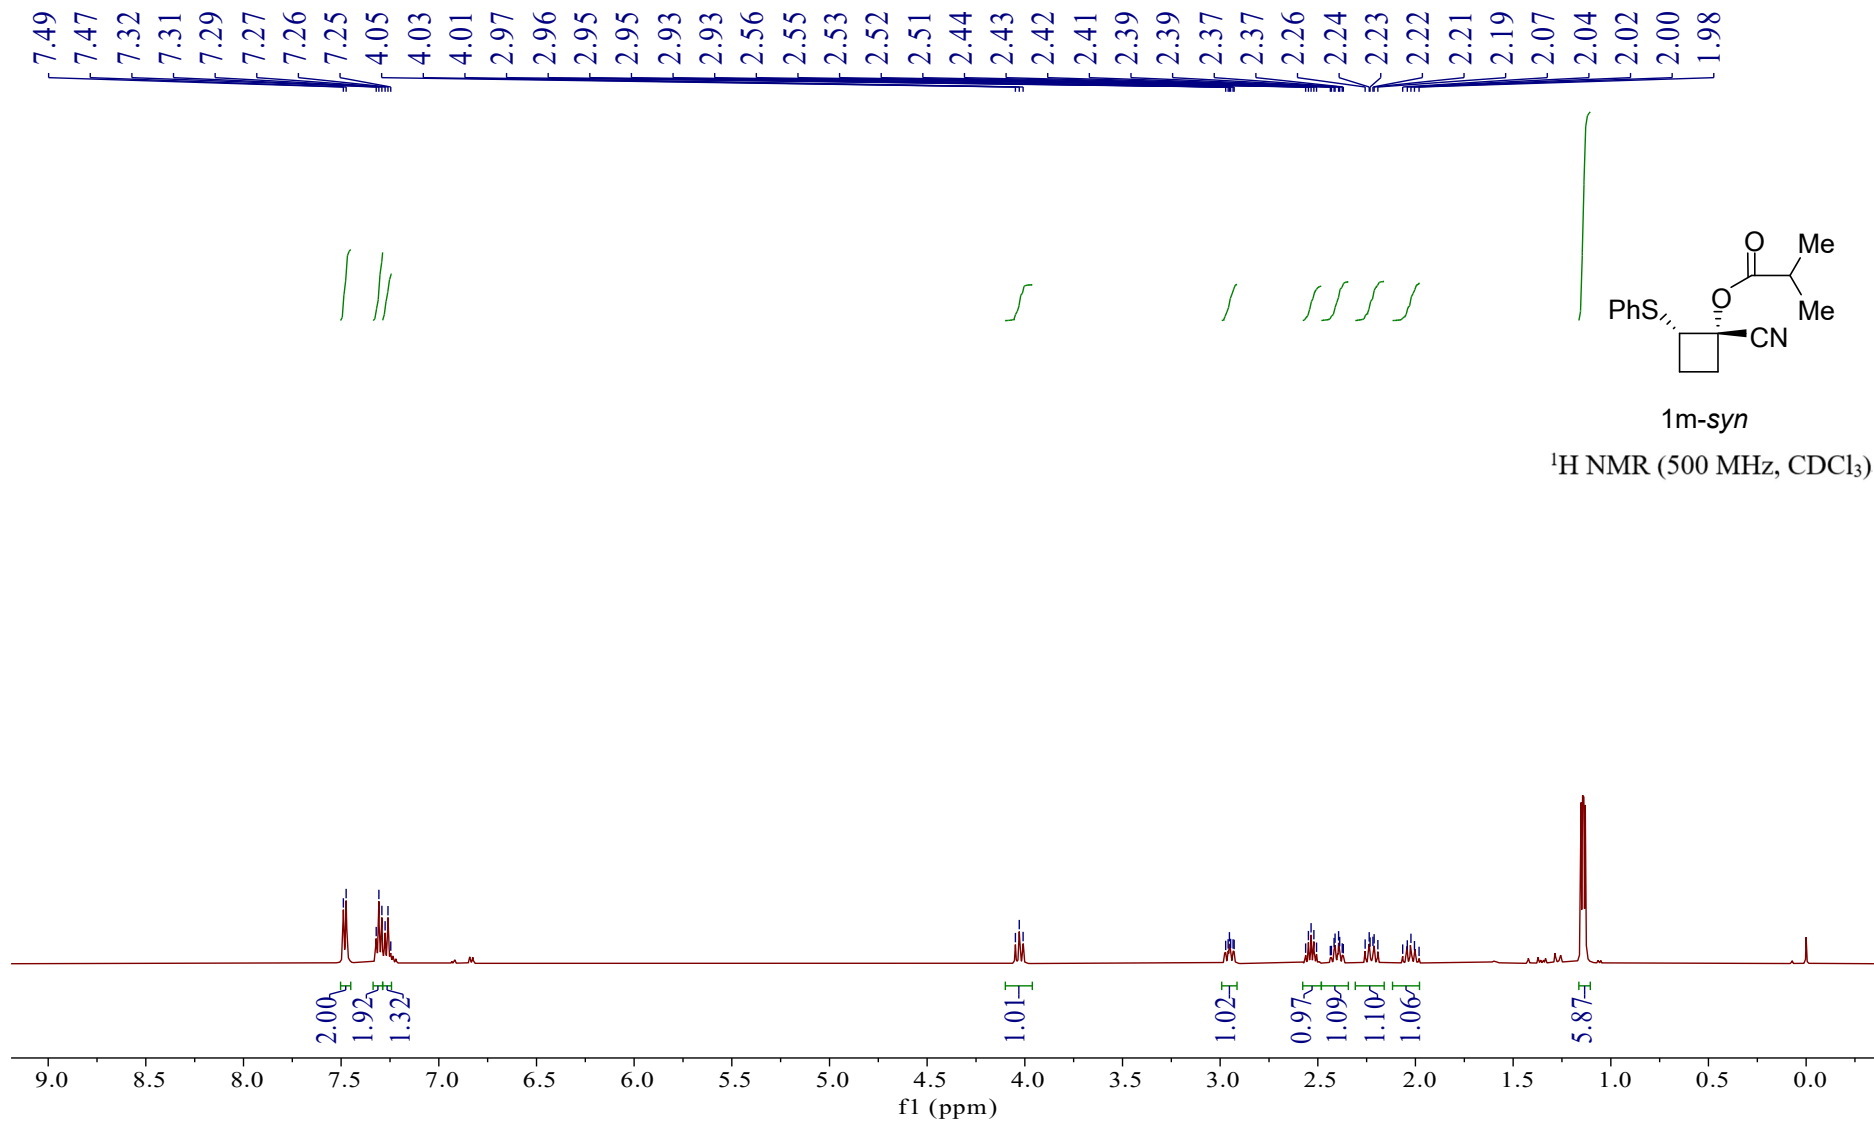

NMR-52



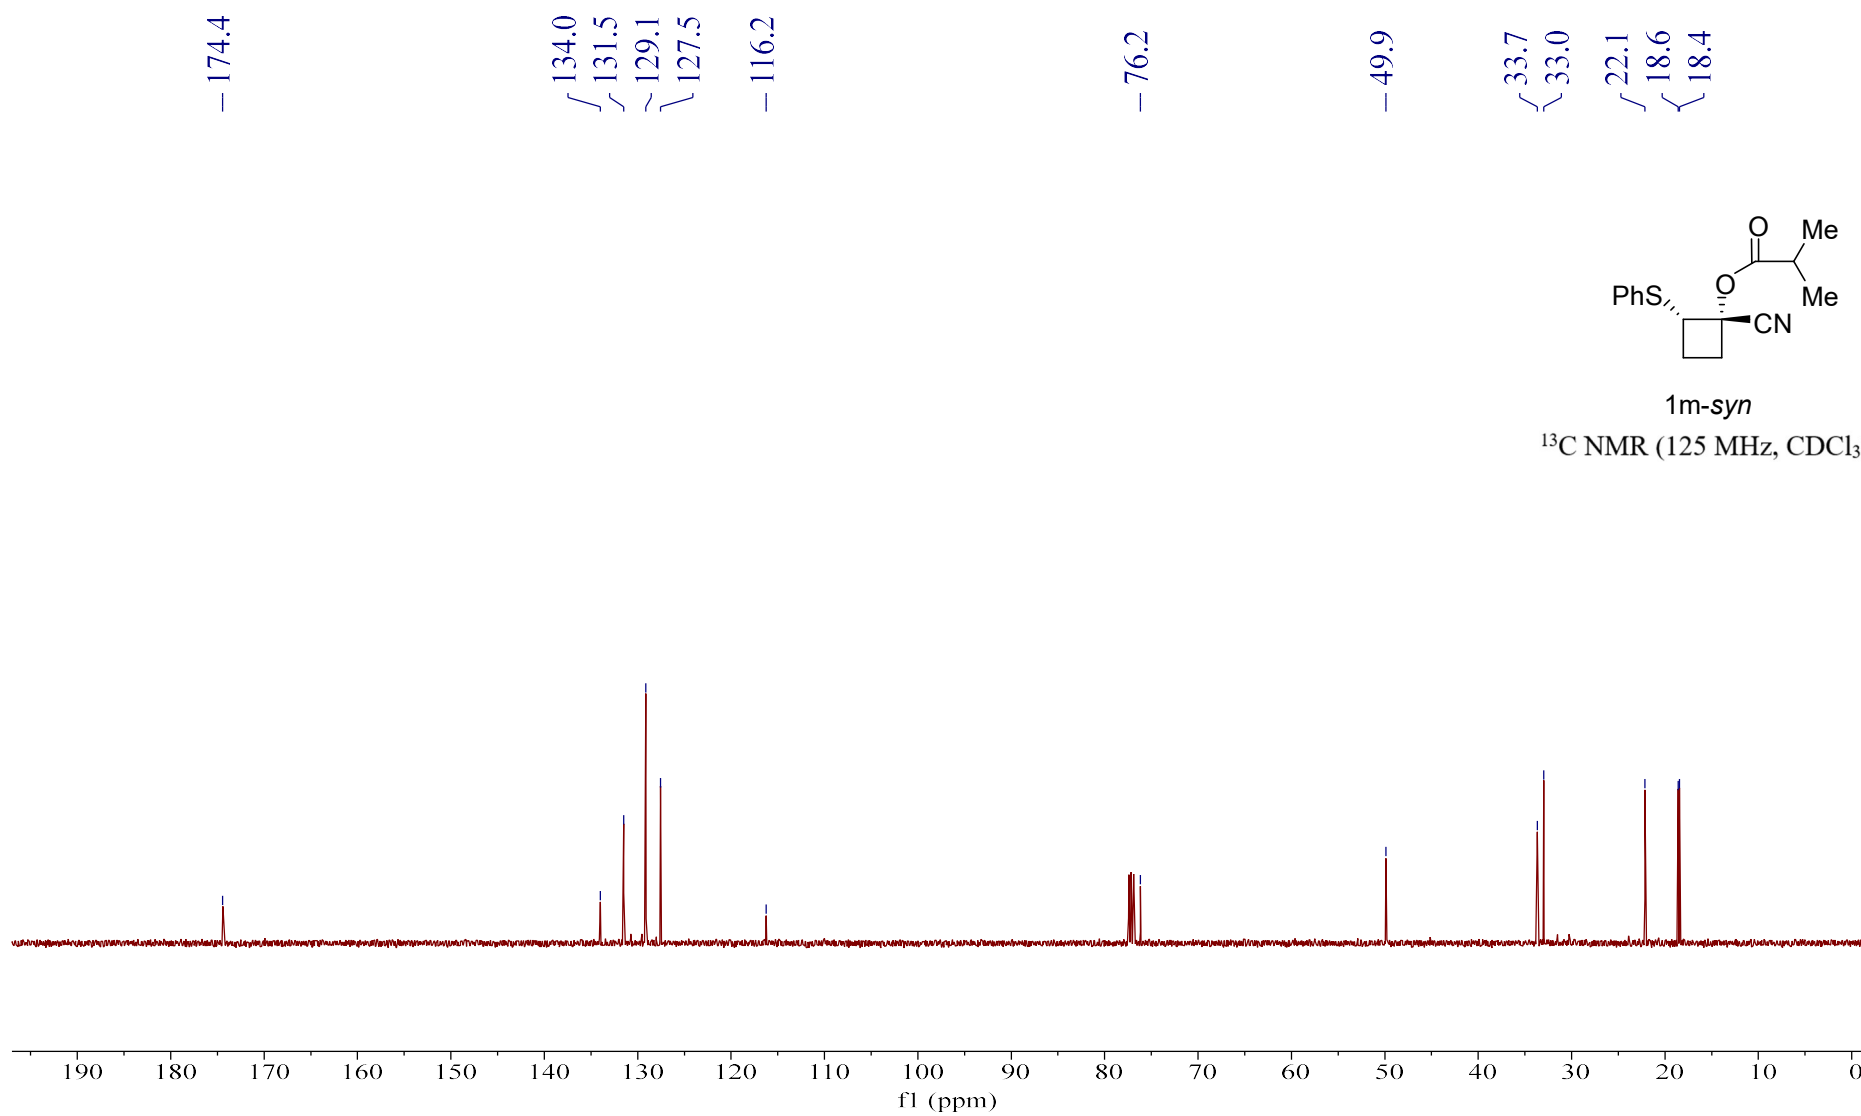

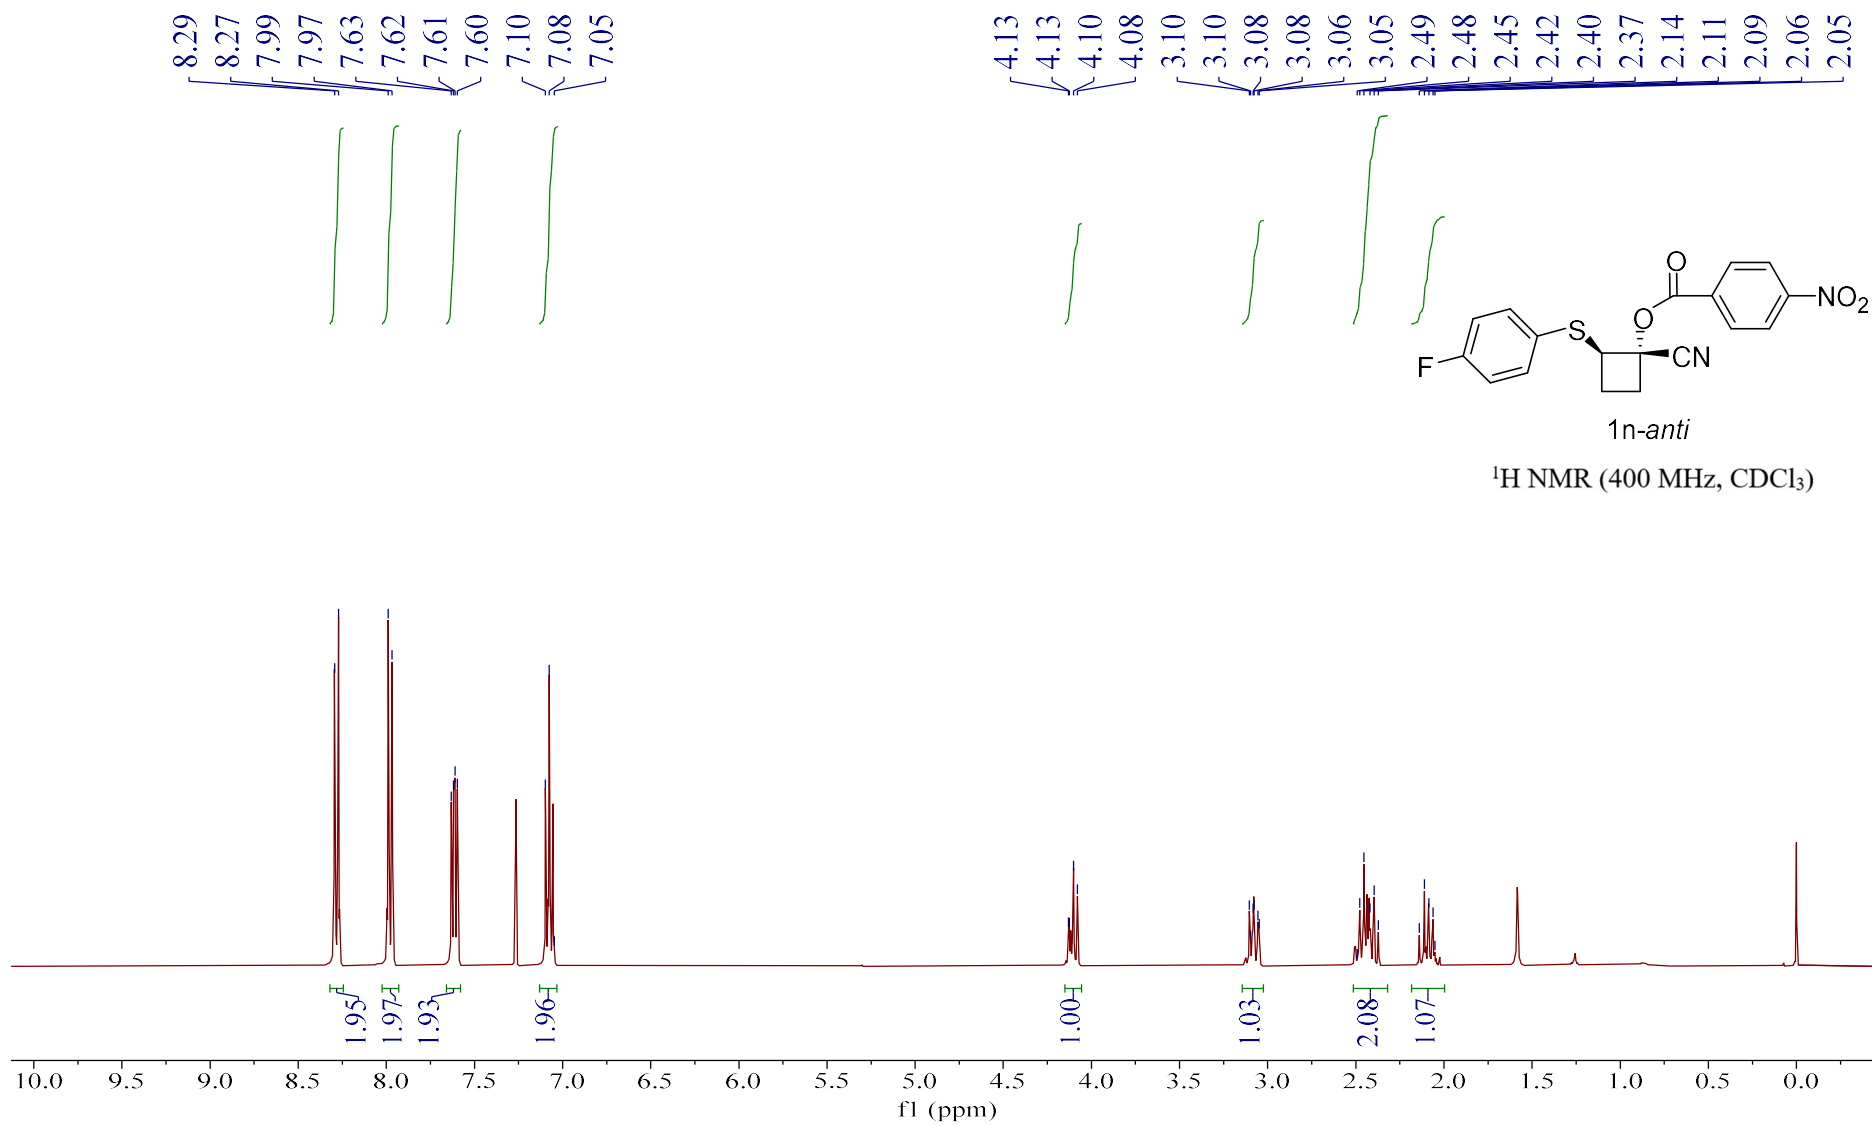

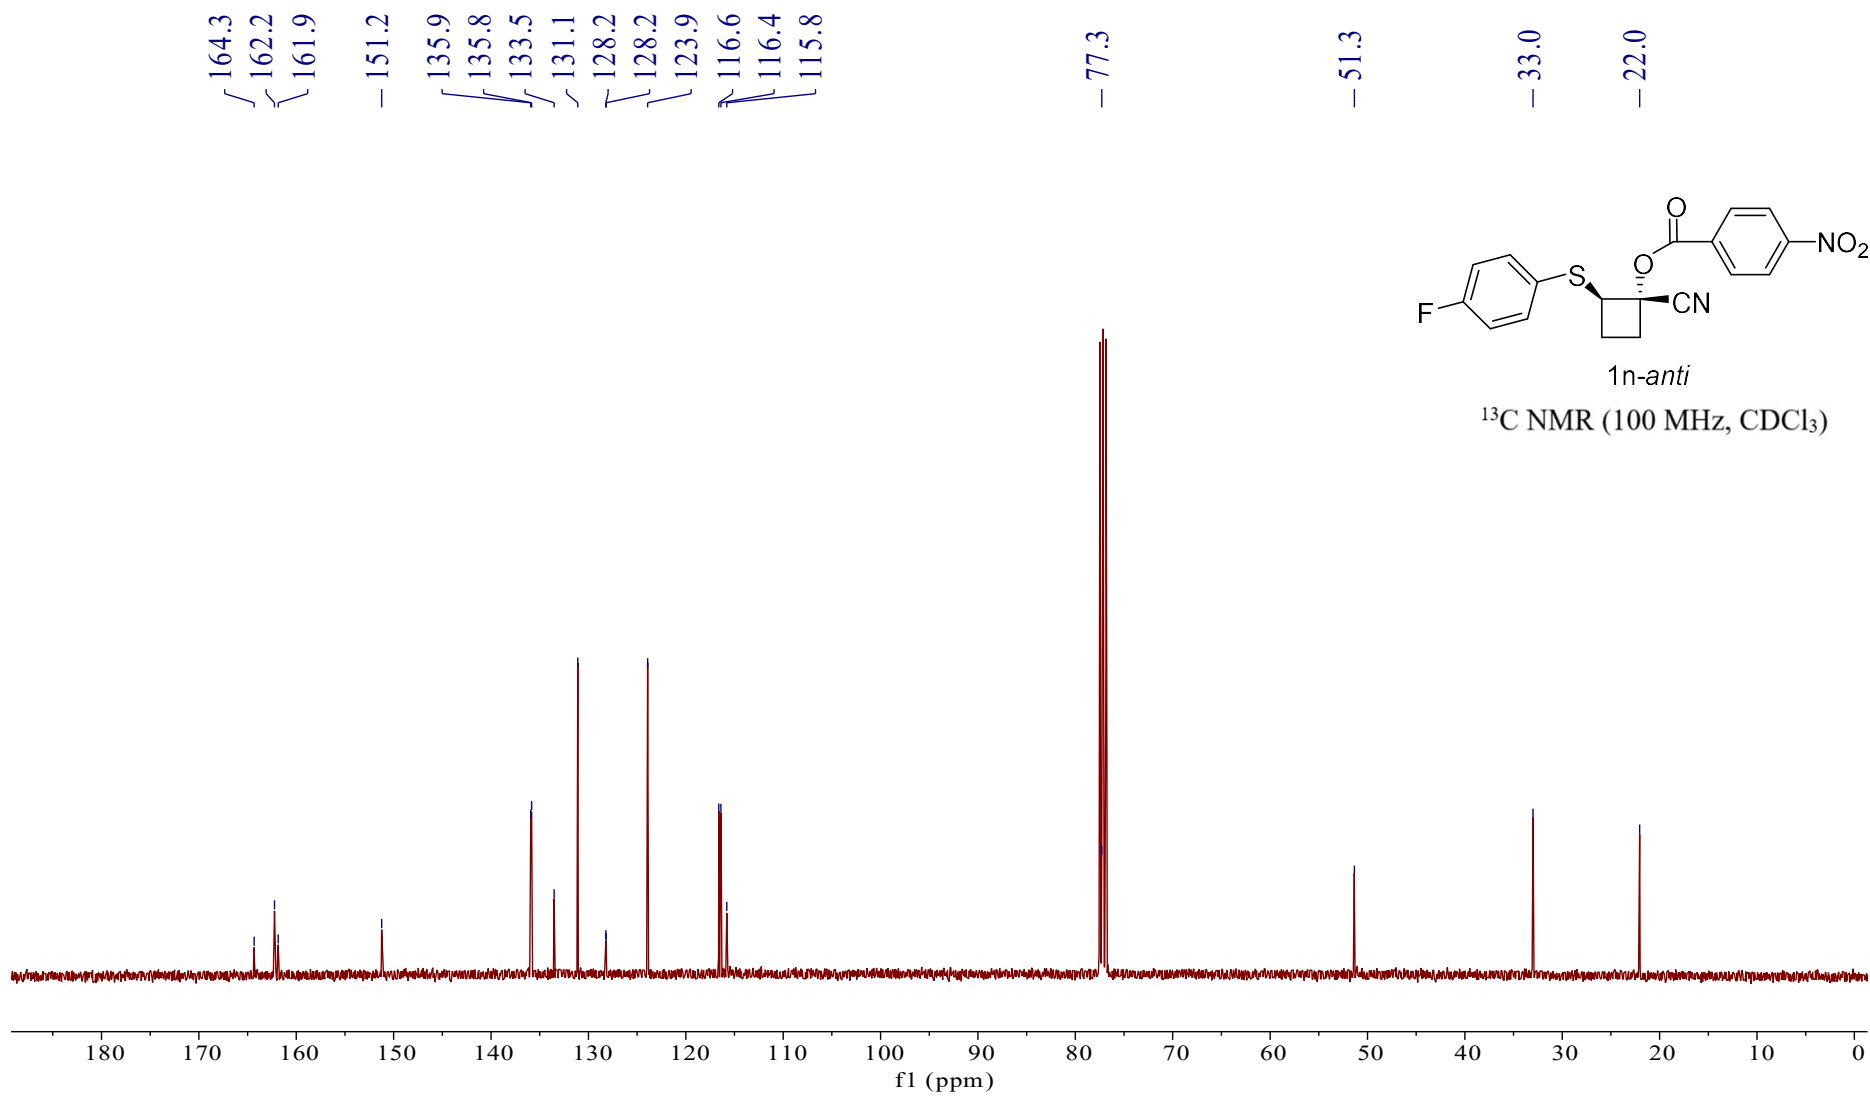

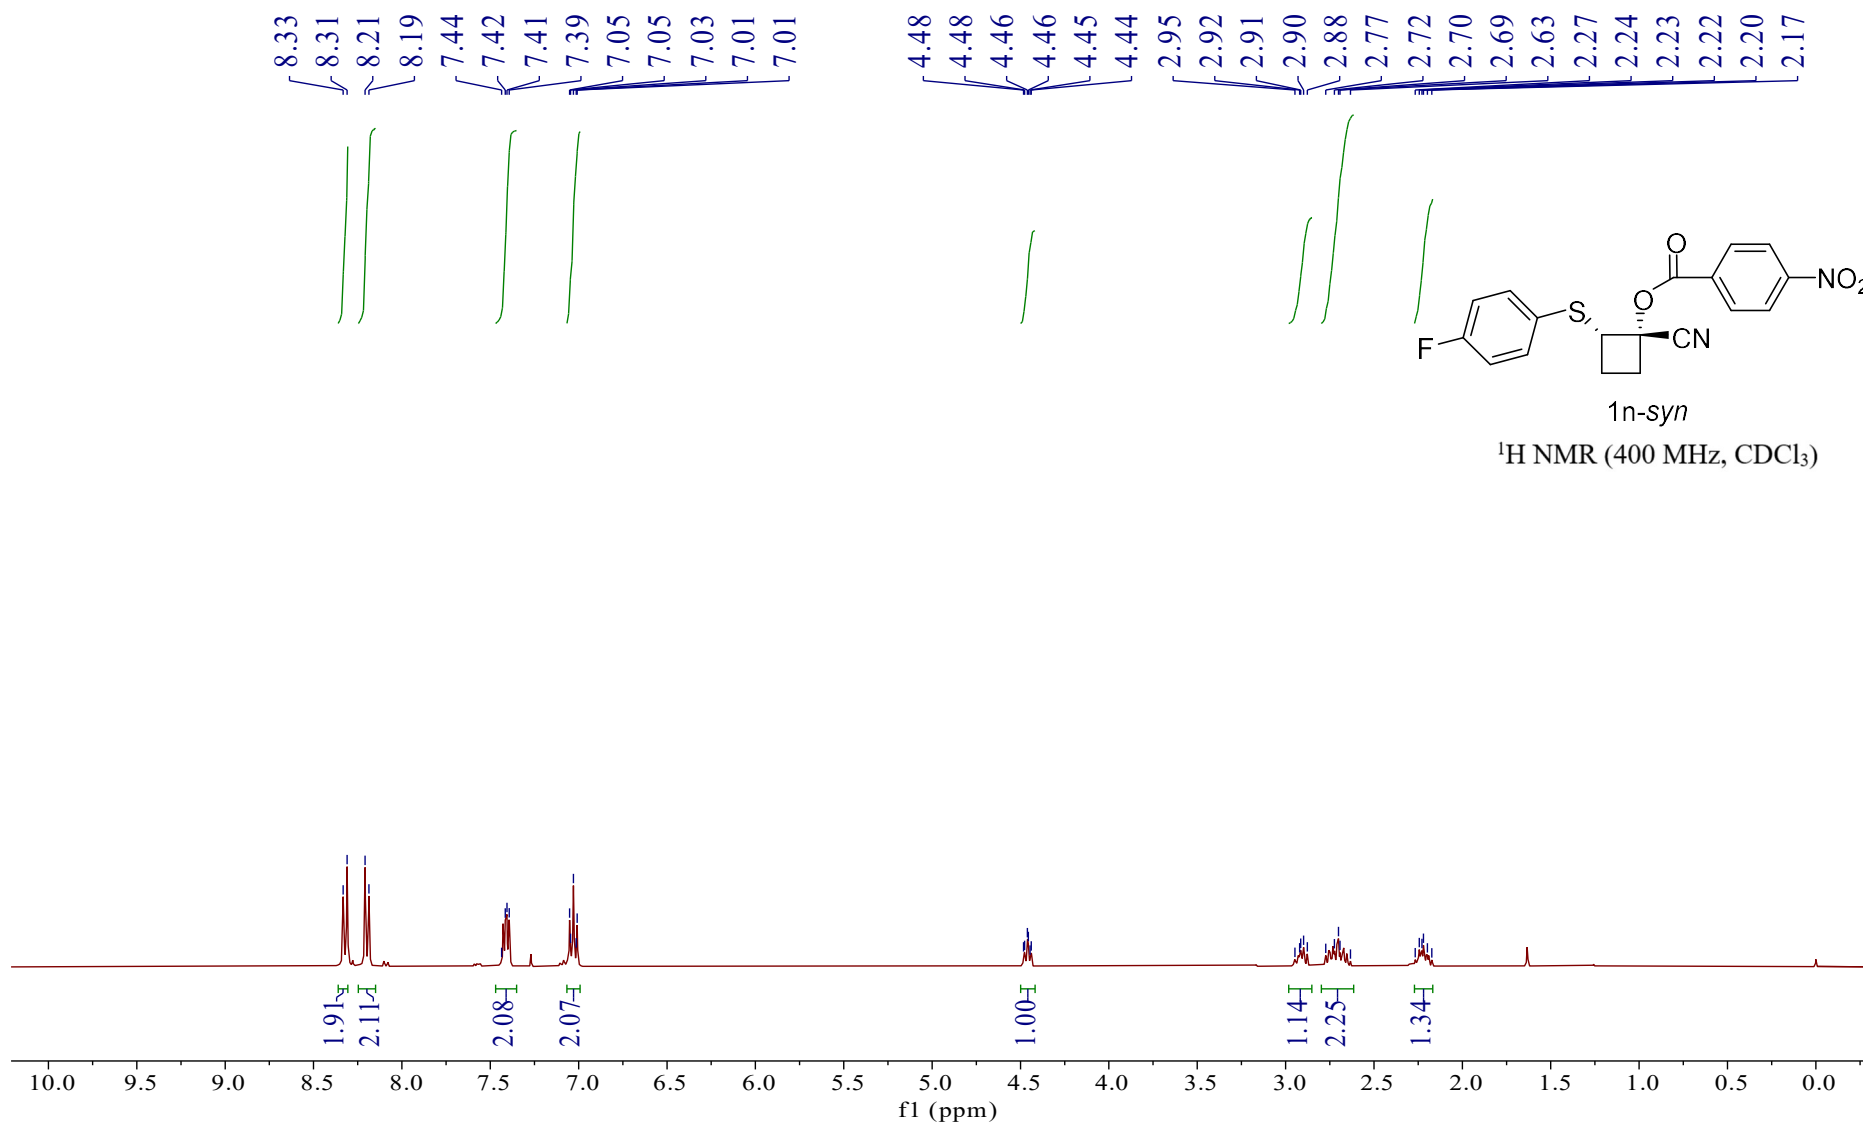

NMR-56

163.8  
162.5  
161.4  
151.2  
133.8  
133.4  
133.3  
131.3  
128.8  
128.8  
123.9  
117.5  
116.7  
116.5

-70.7

-52.3

-32.5

-24.1

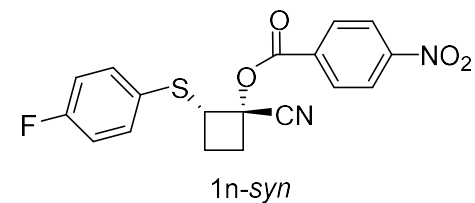

<sup>13</sup>C NMR (100 MHz, CDCl<sub>3</sub>)

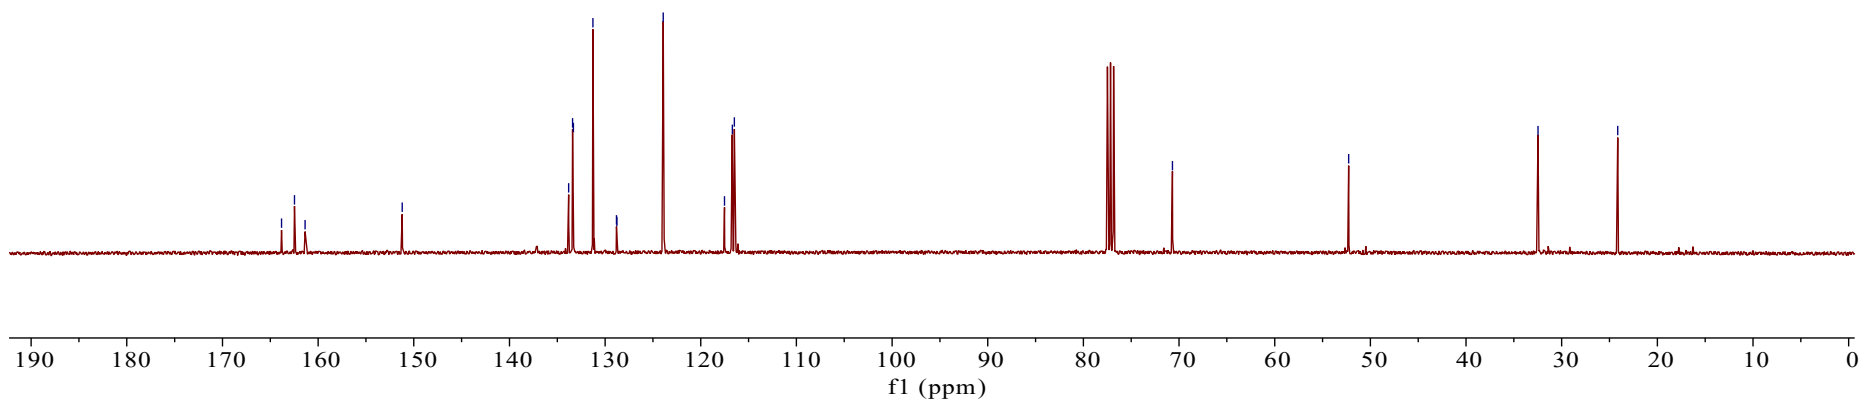

NMR-57

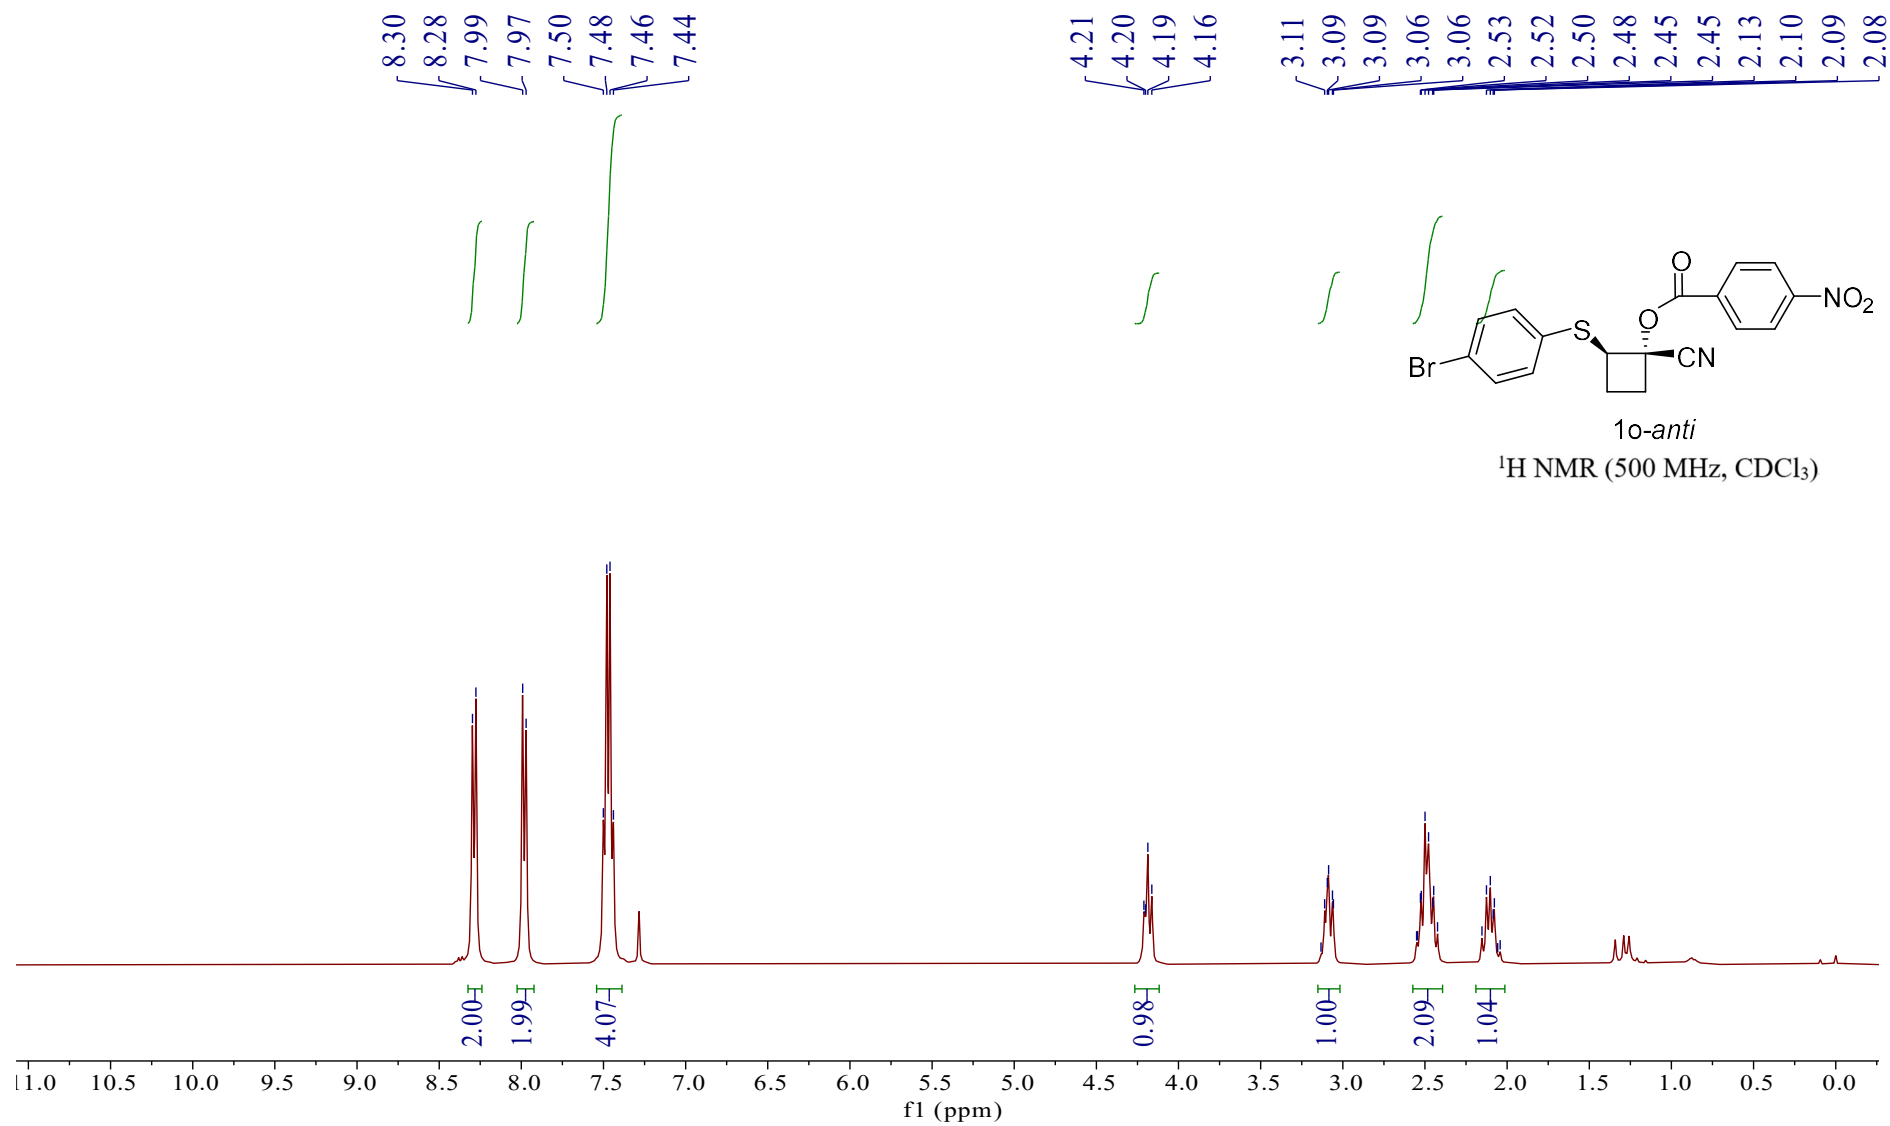

NMR-58

— 162.1  
— 151.1  
134.1  
133.4  
132.5  
132.4  
131.0  
123.8  
122.4  
115.6

— 77.1

— 50.4

— 33.0

— 22.0

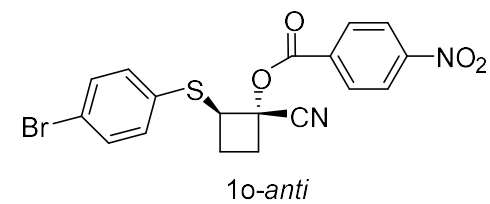

<sup>13</sup>C NMR (125 MHz, CDCl<sub>3</sub>)

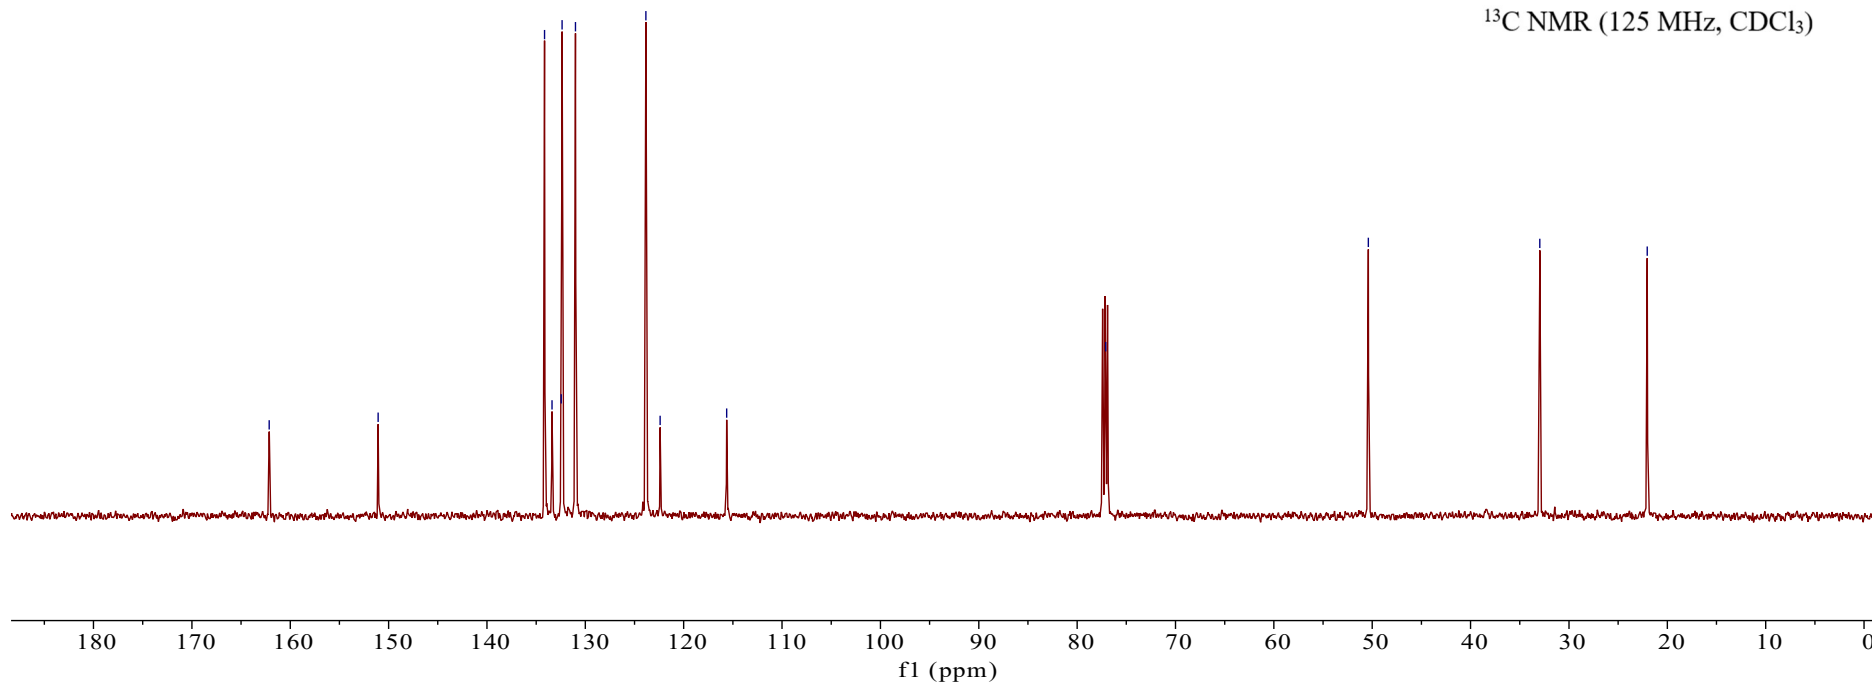

NMR-59

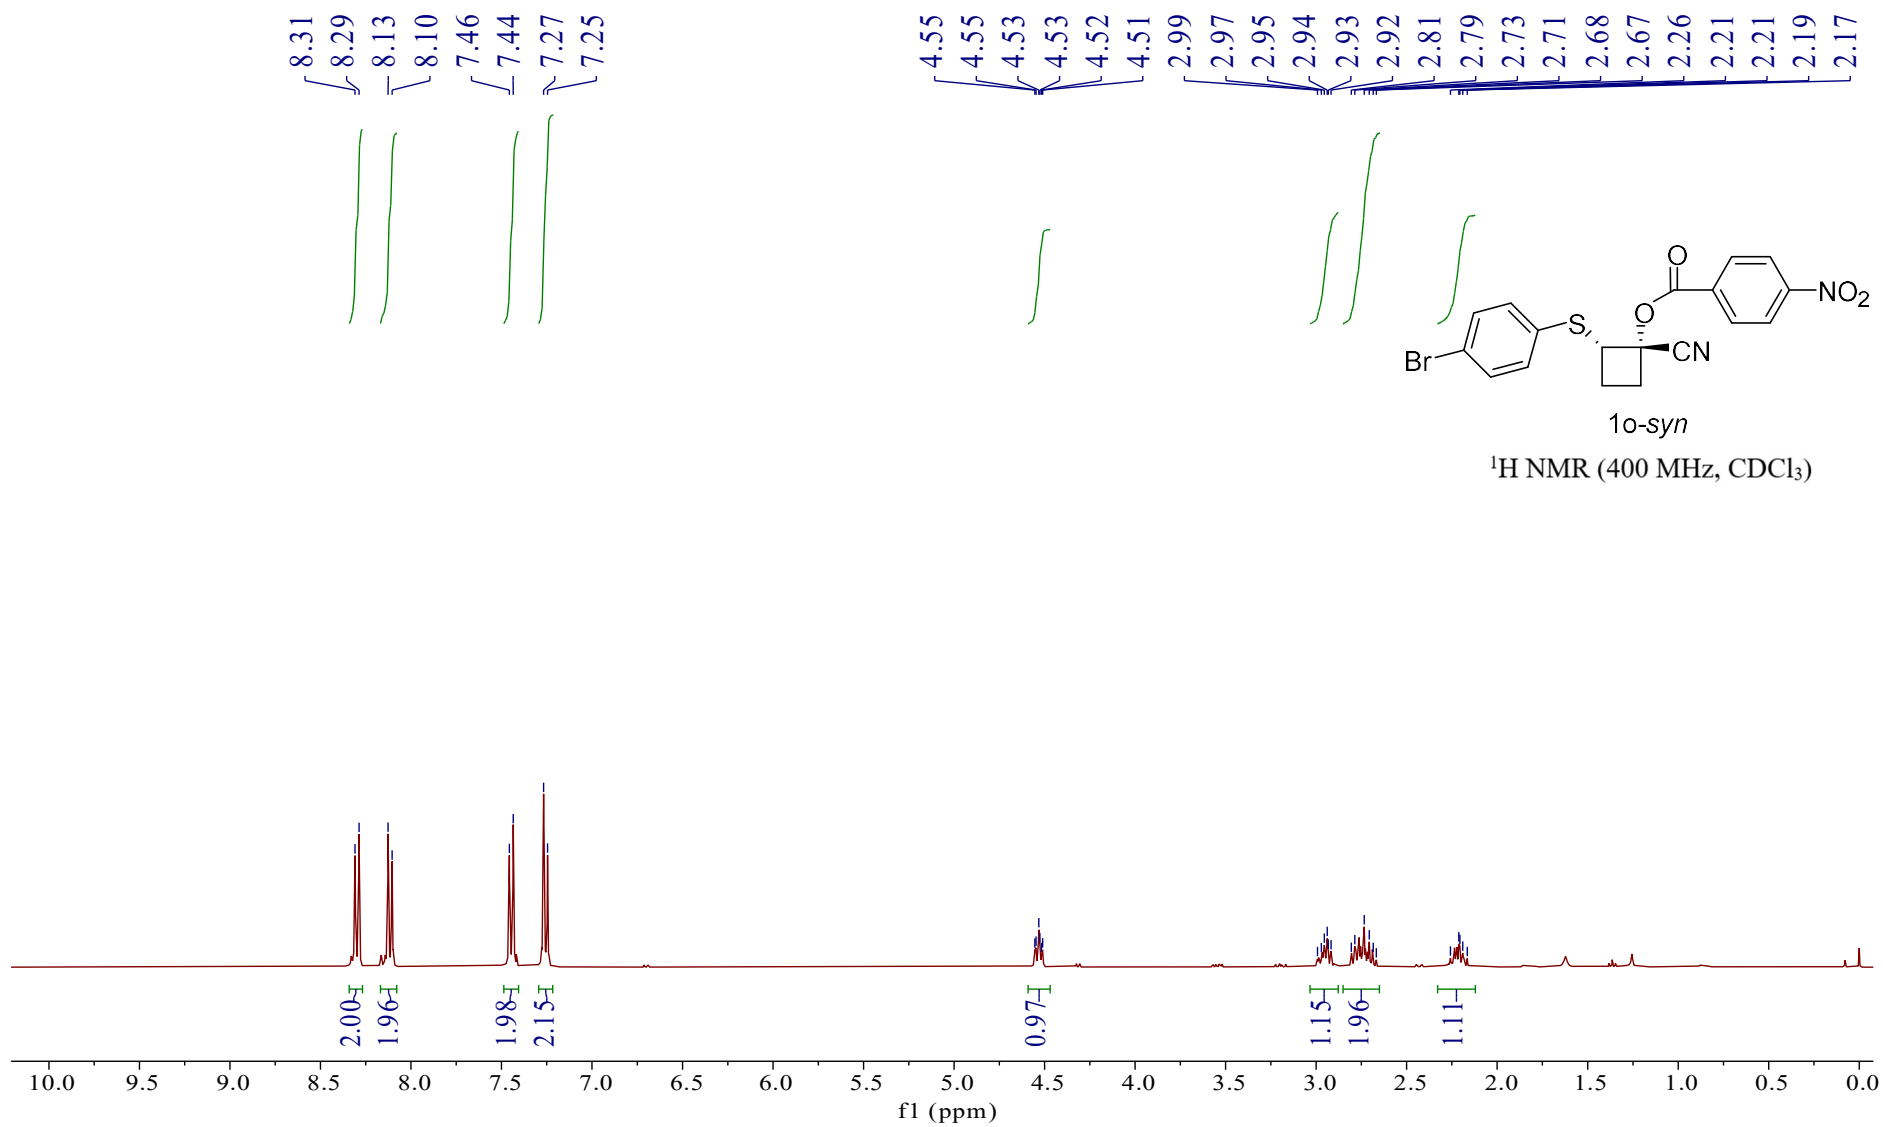

NMR-60



— 162.4  
— 151.2  
133.7  
133.3  
132.5  
131.7  
131.3  
123.9  
121.6  
117.6

— 70.6

— 51.2

— 32.7

— 23.9

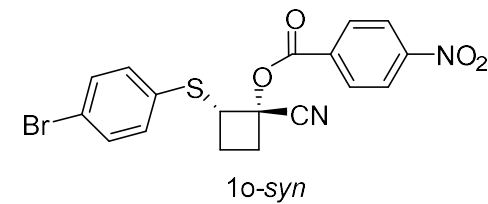

$^{13}\text{C}$  NMR (100 MHz,  $\text{CDCl}_3$ )

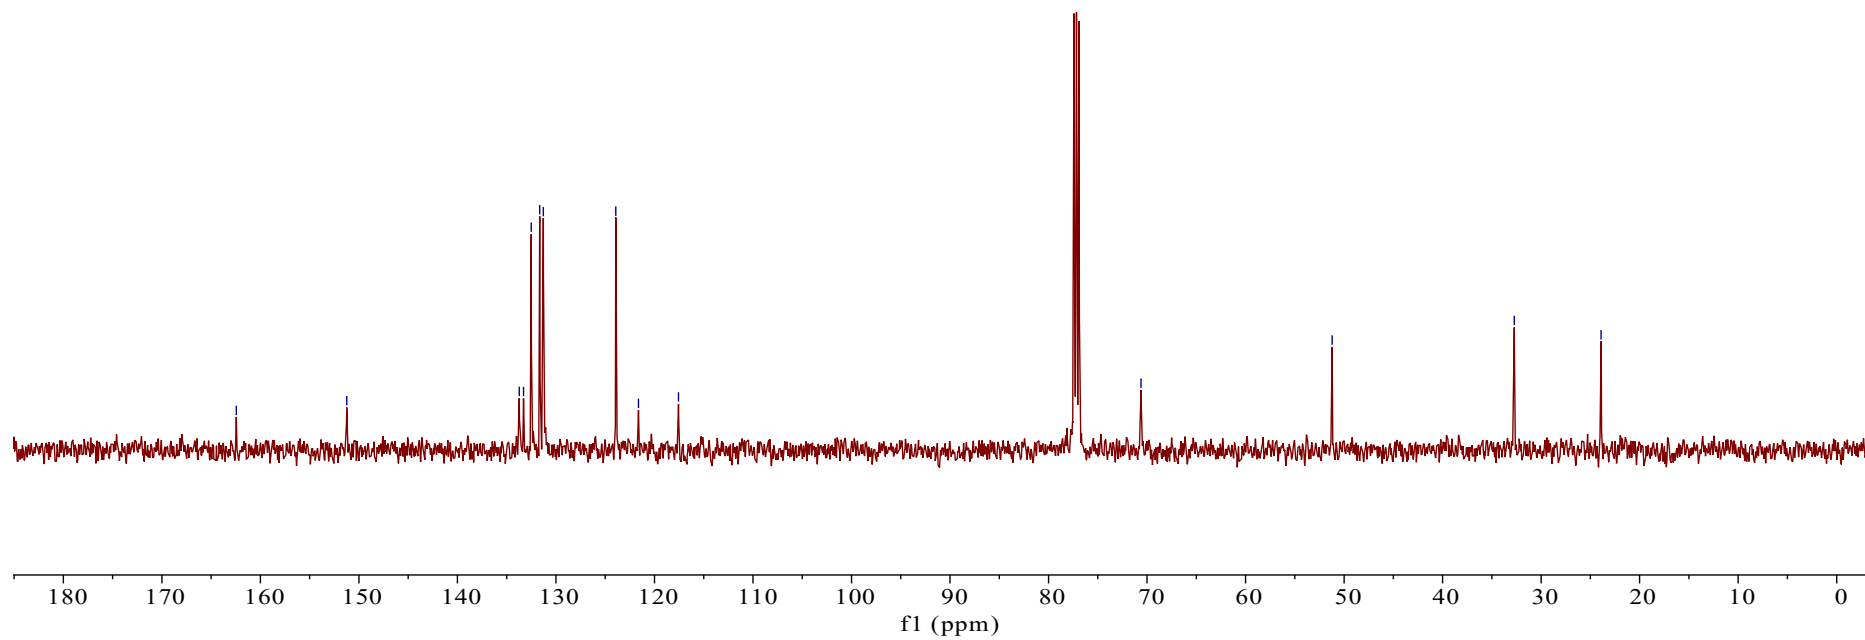

NMR-61

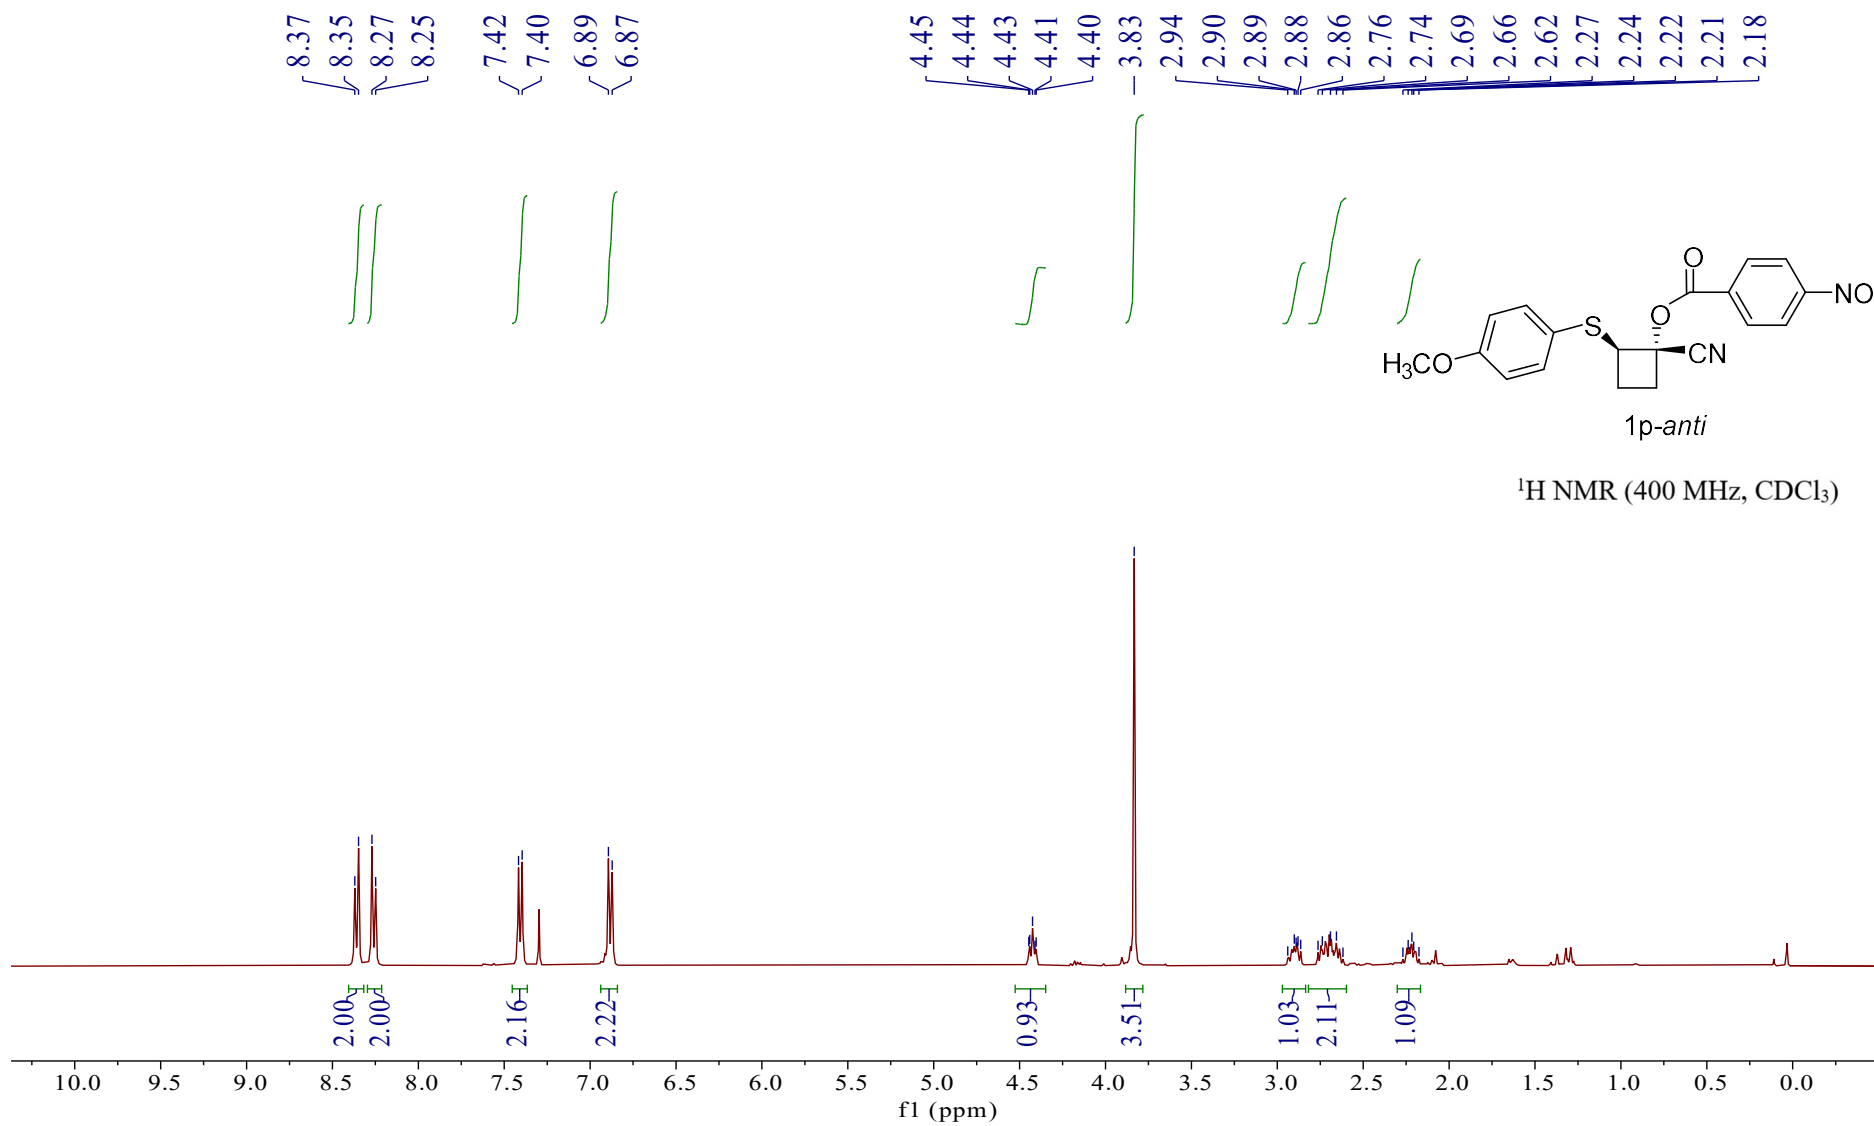

~ 162.5  
~ 160.0

- 151.2

134.1  
134.0  
131.3  
123.9  
123.7  
117.7  
115.0

- 70.8

~ 55.5  
~ 52.8

- 32.5

- 24.0

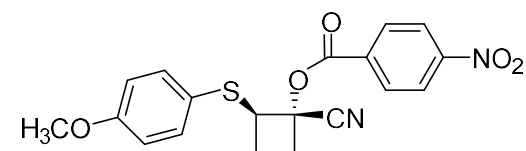

1p-anti

<sup>13</sup>C NMR (125 MHz, CDCl<sub>3</sub>)

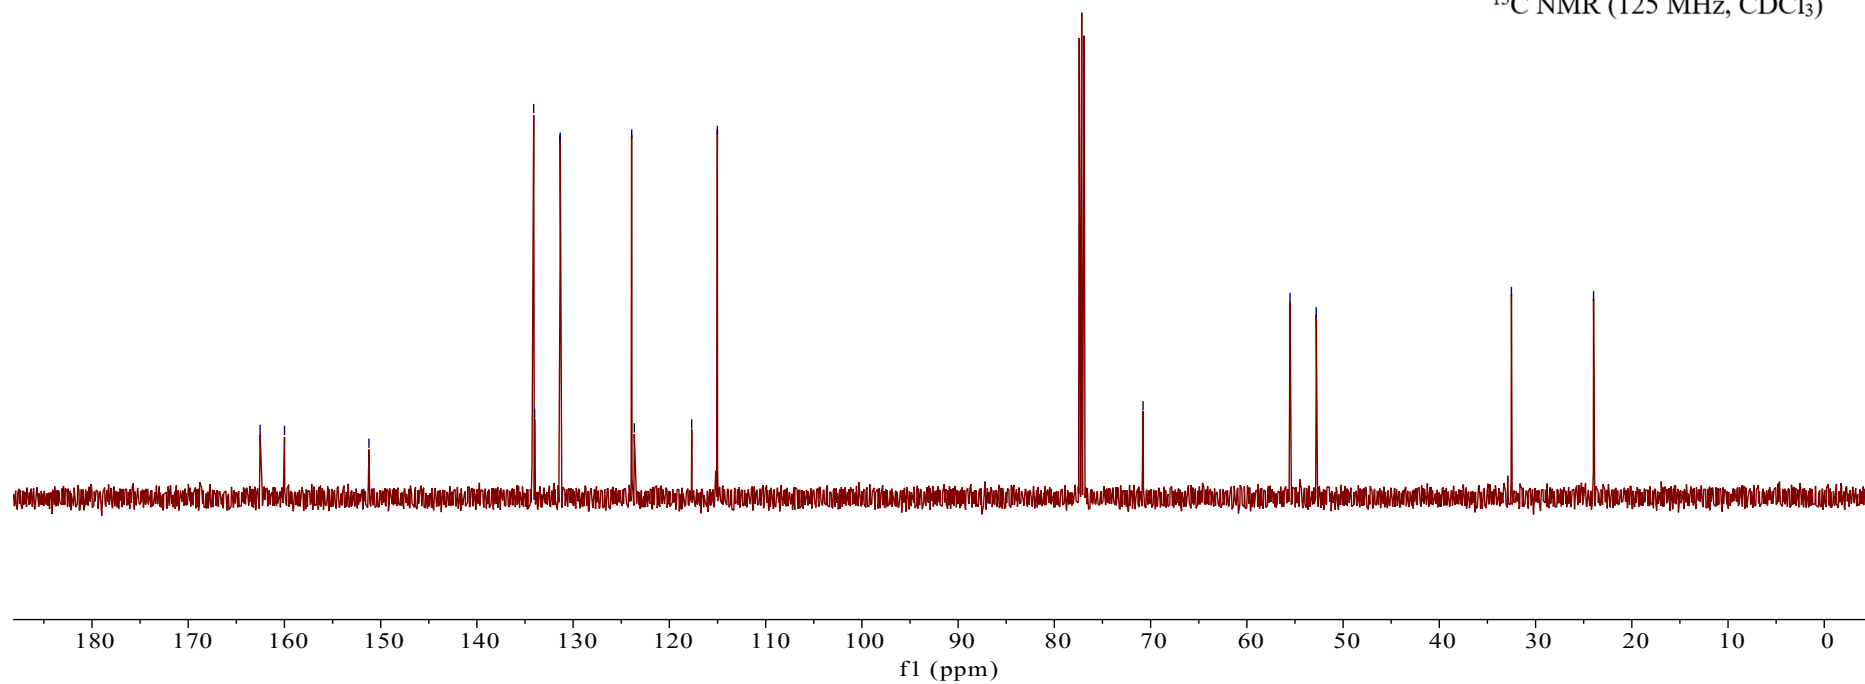

NMR-63

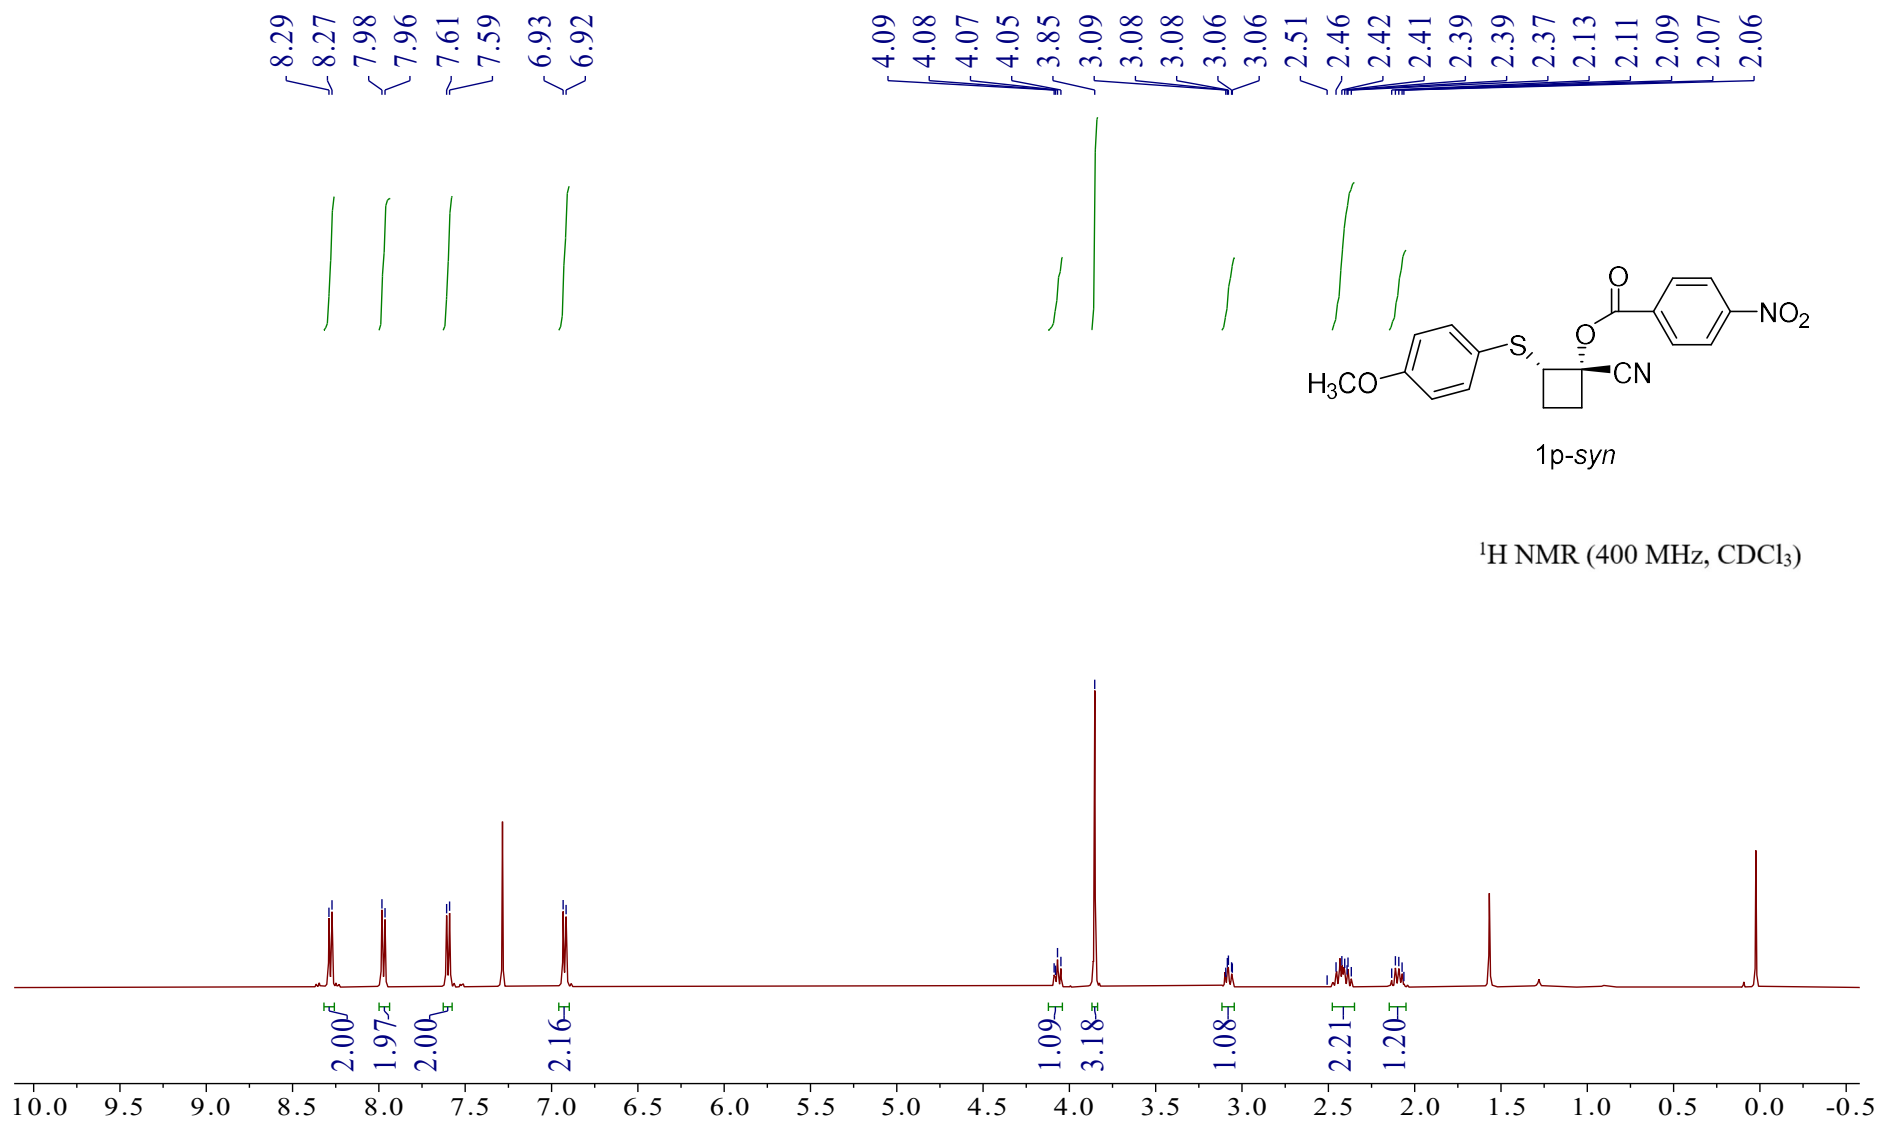

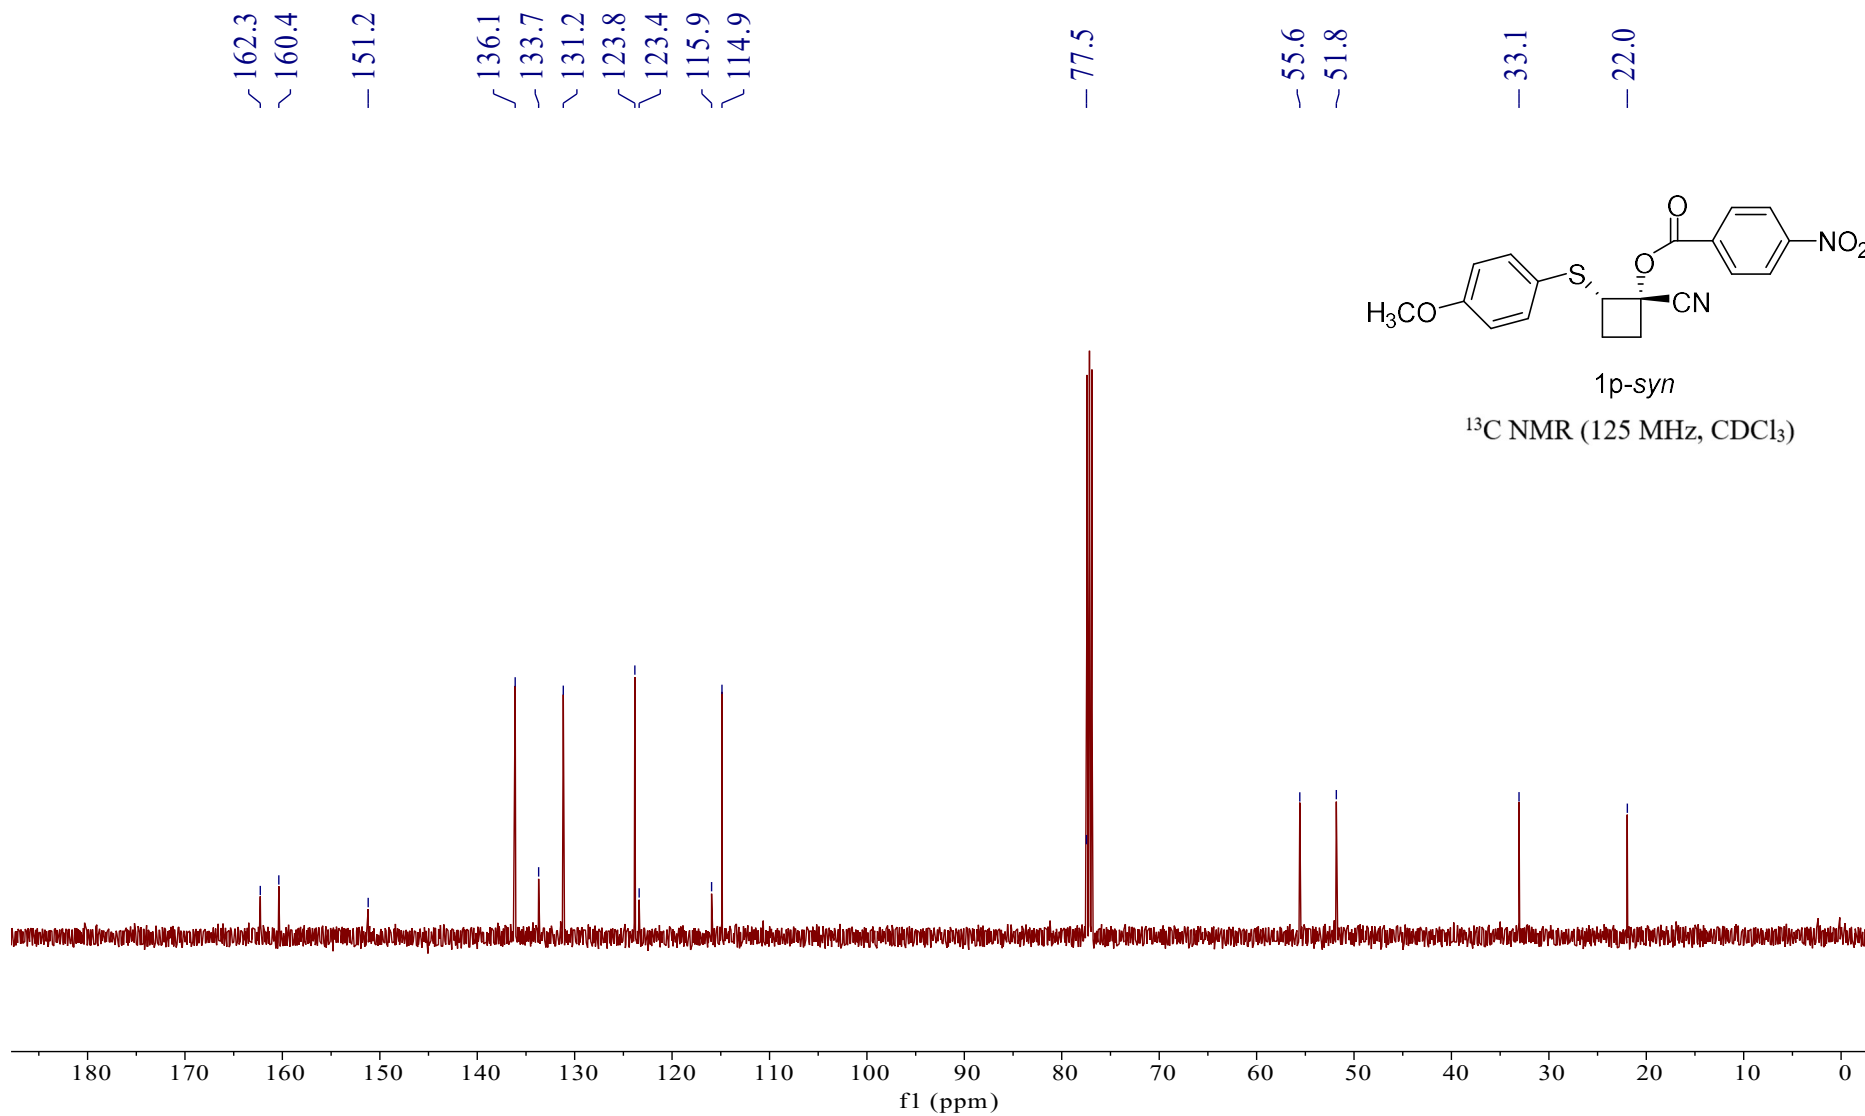

NMR-65

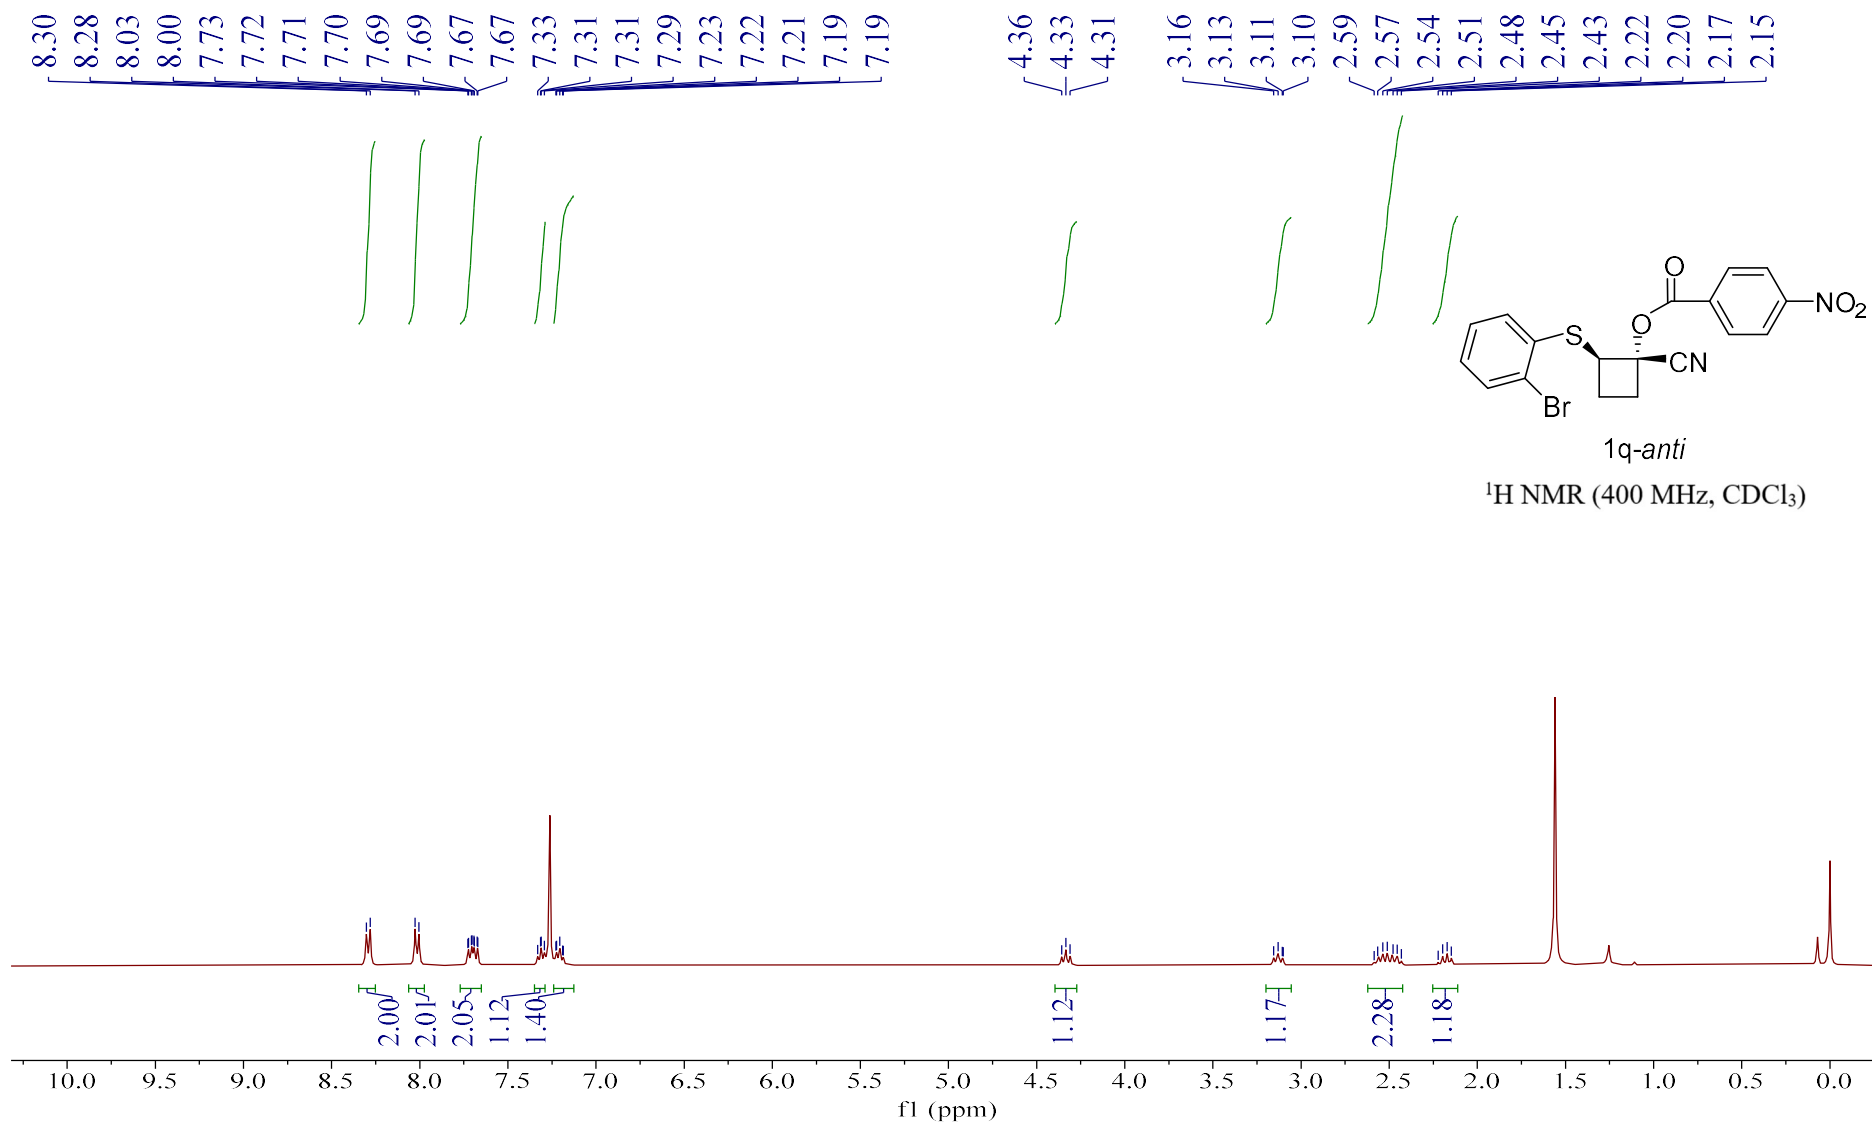

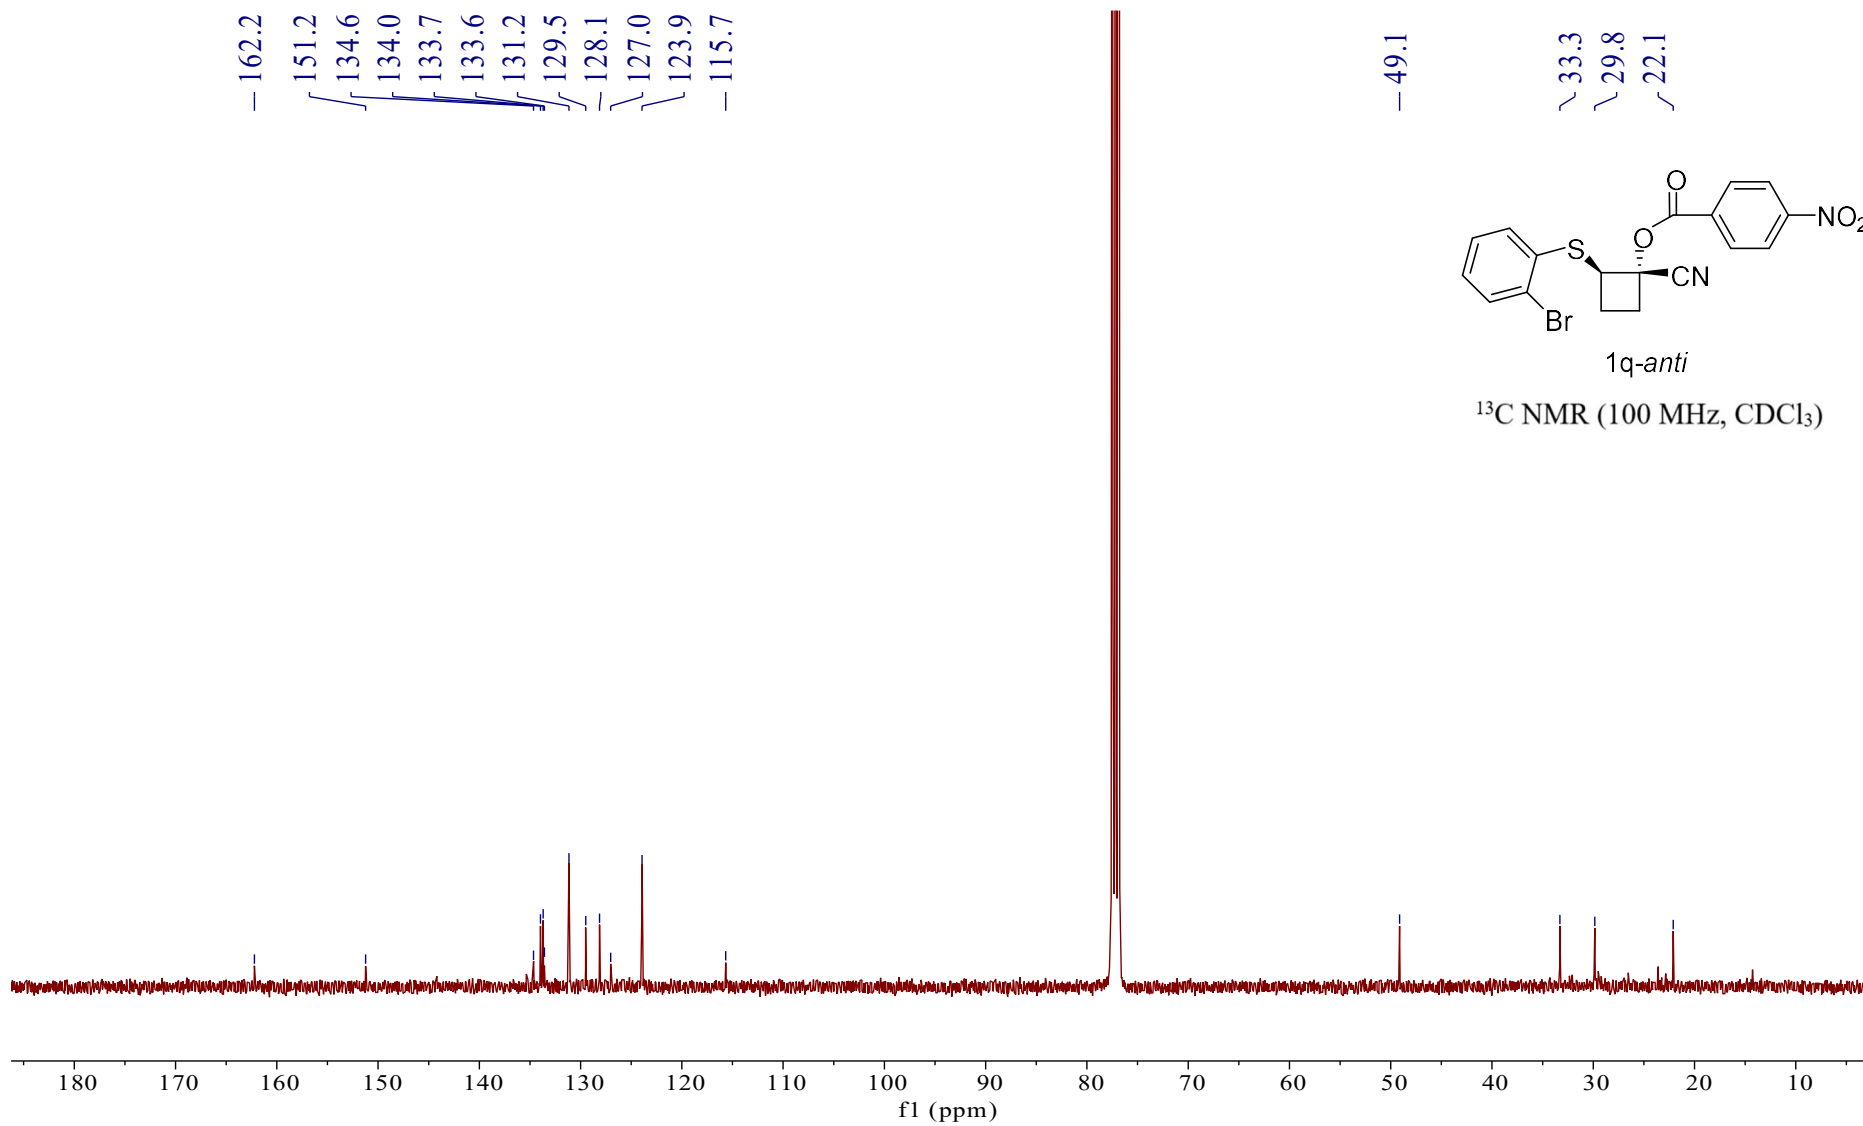

NMR-67

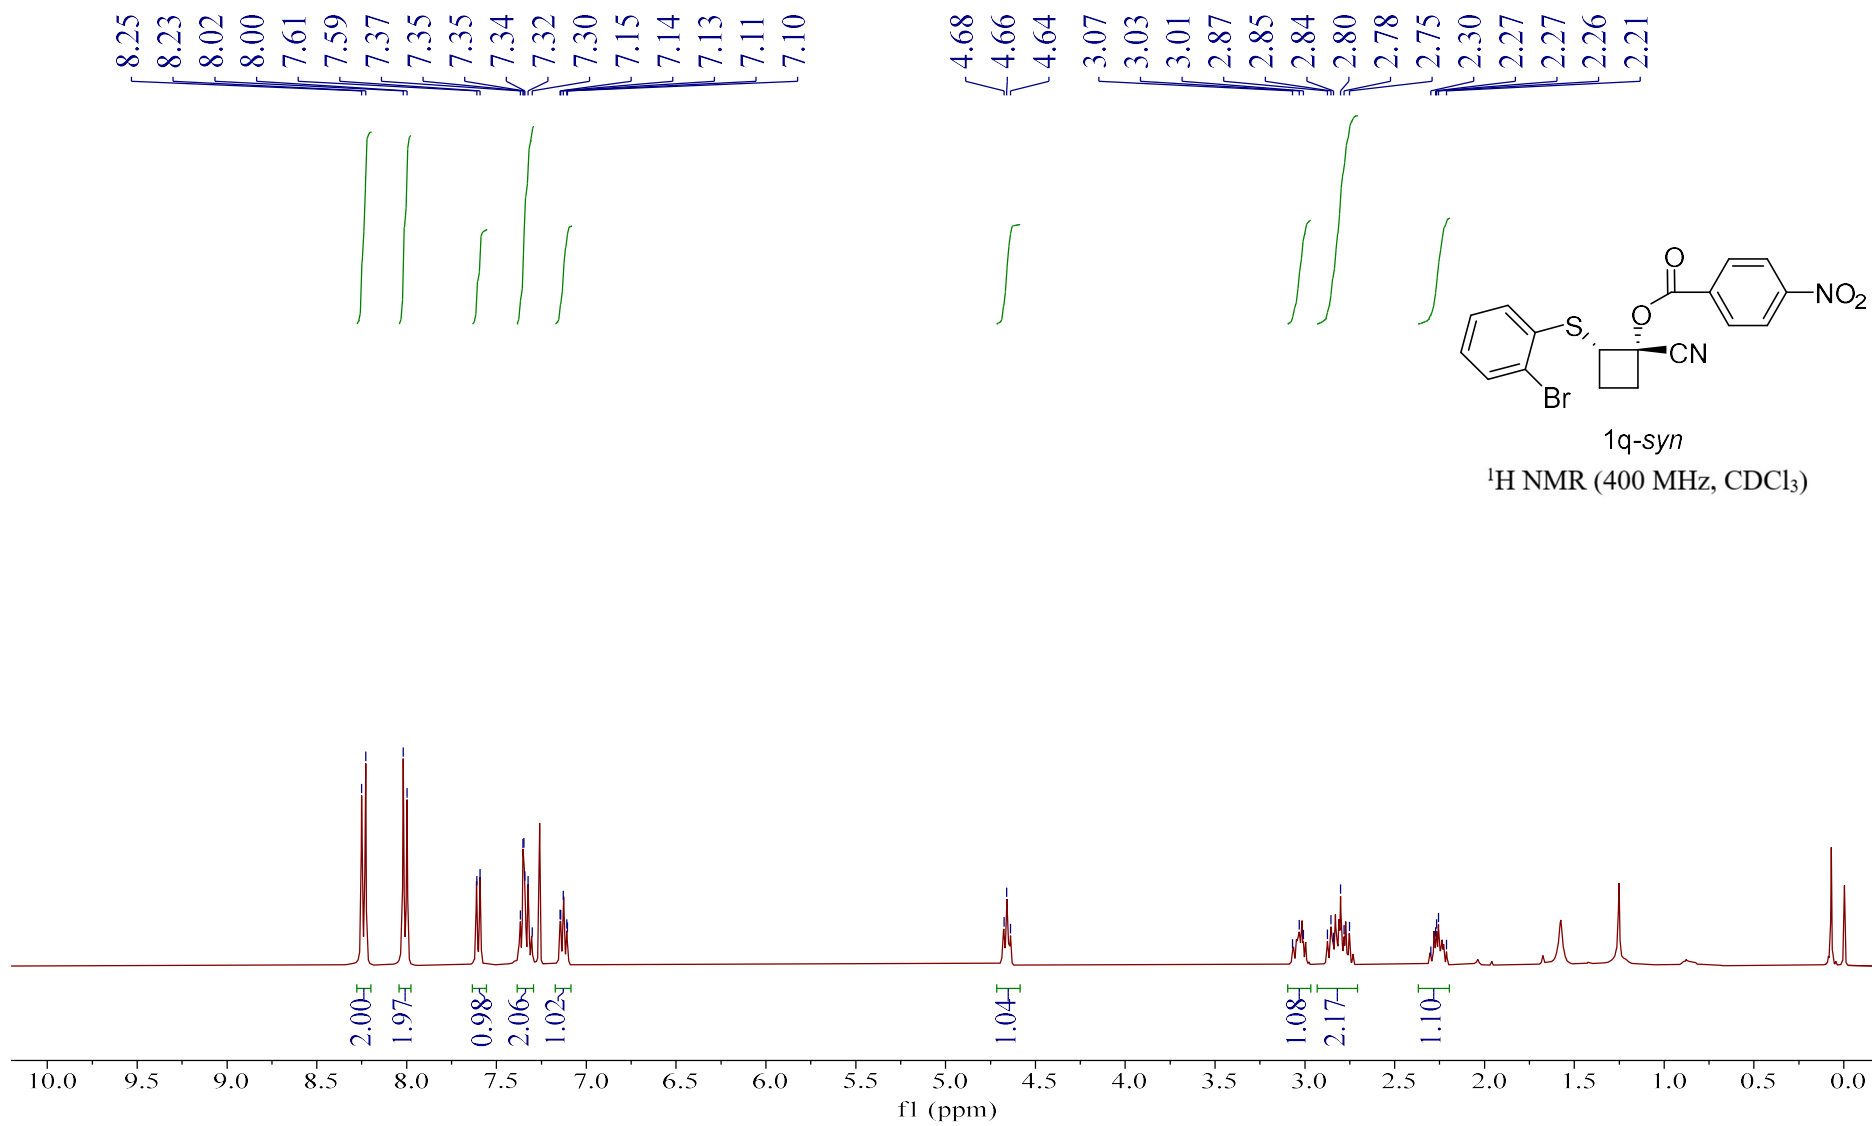

NMR-68



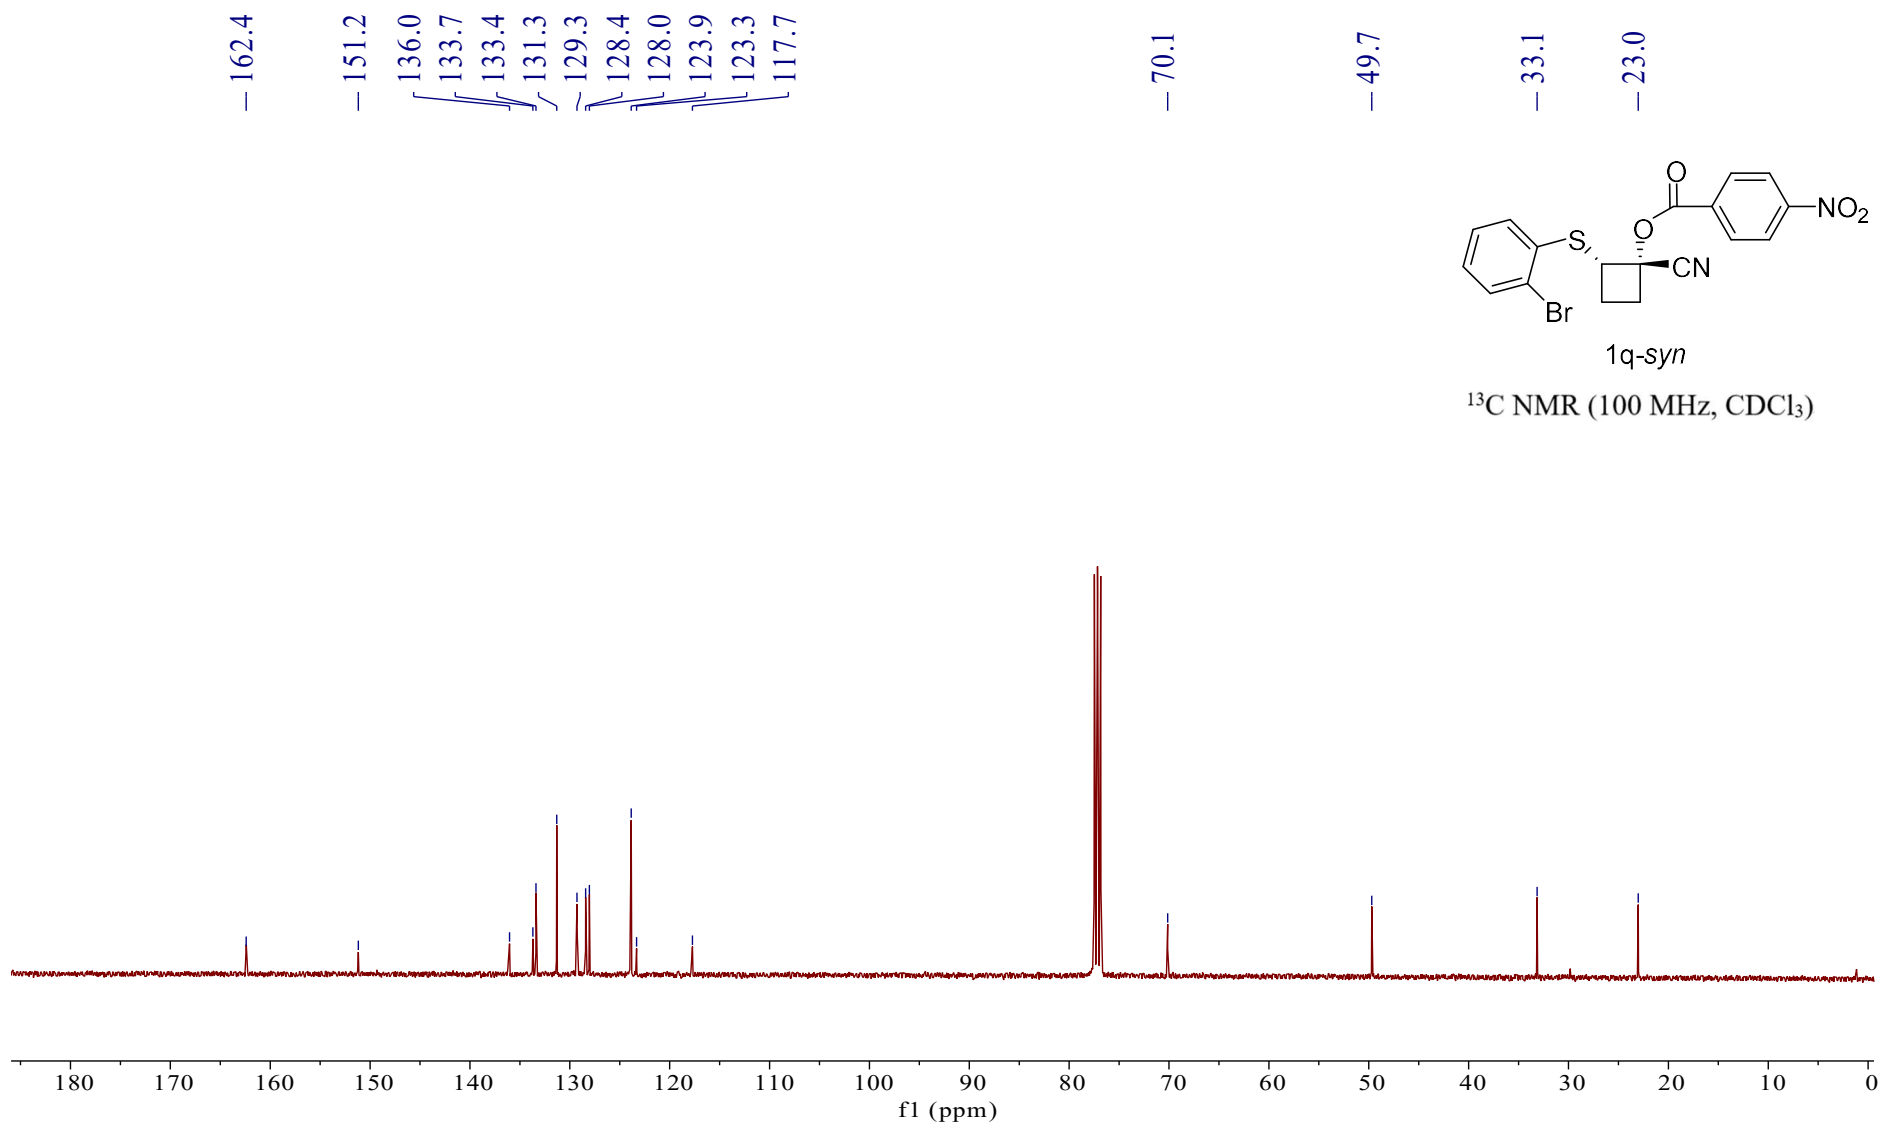

NMR-69

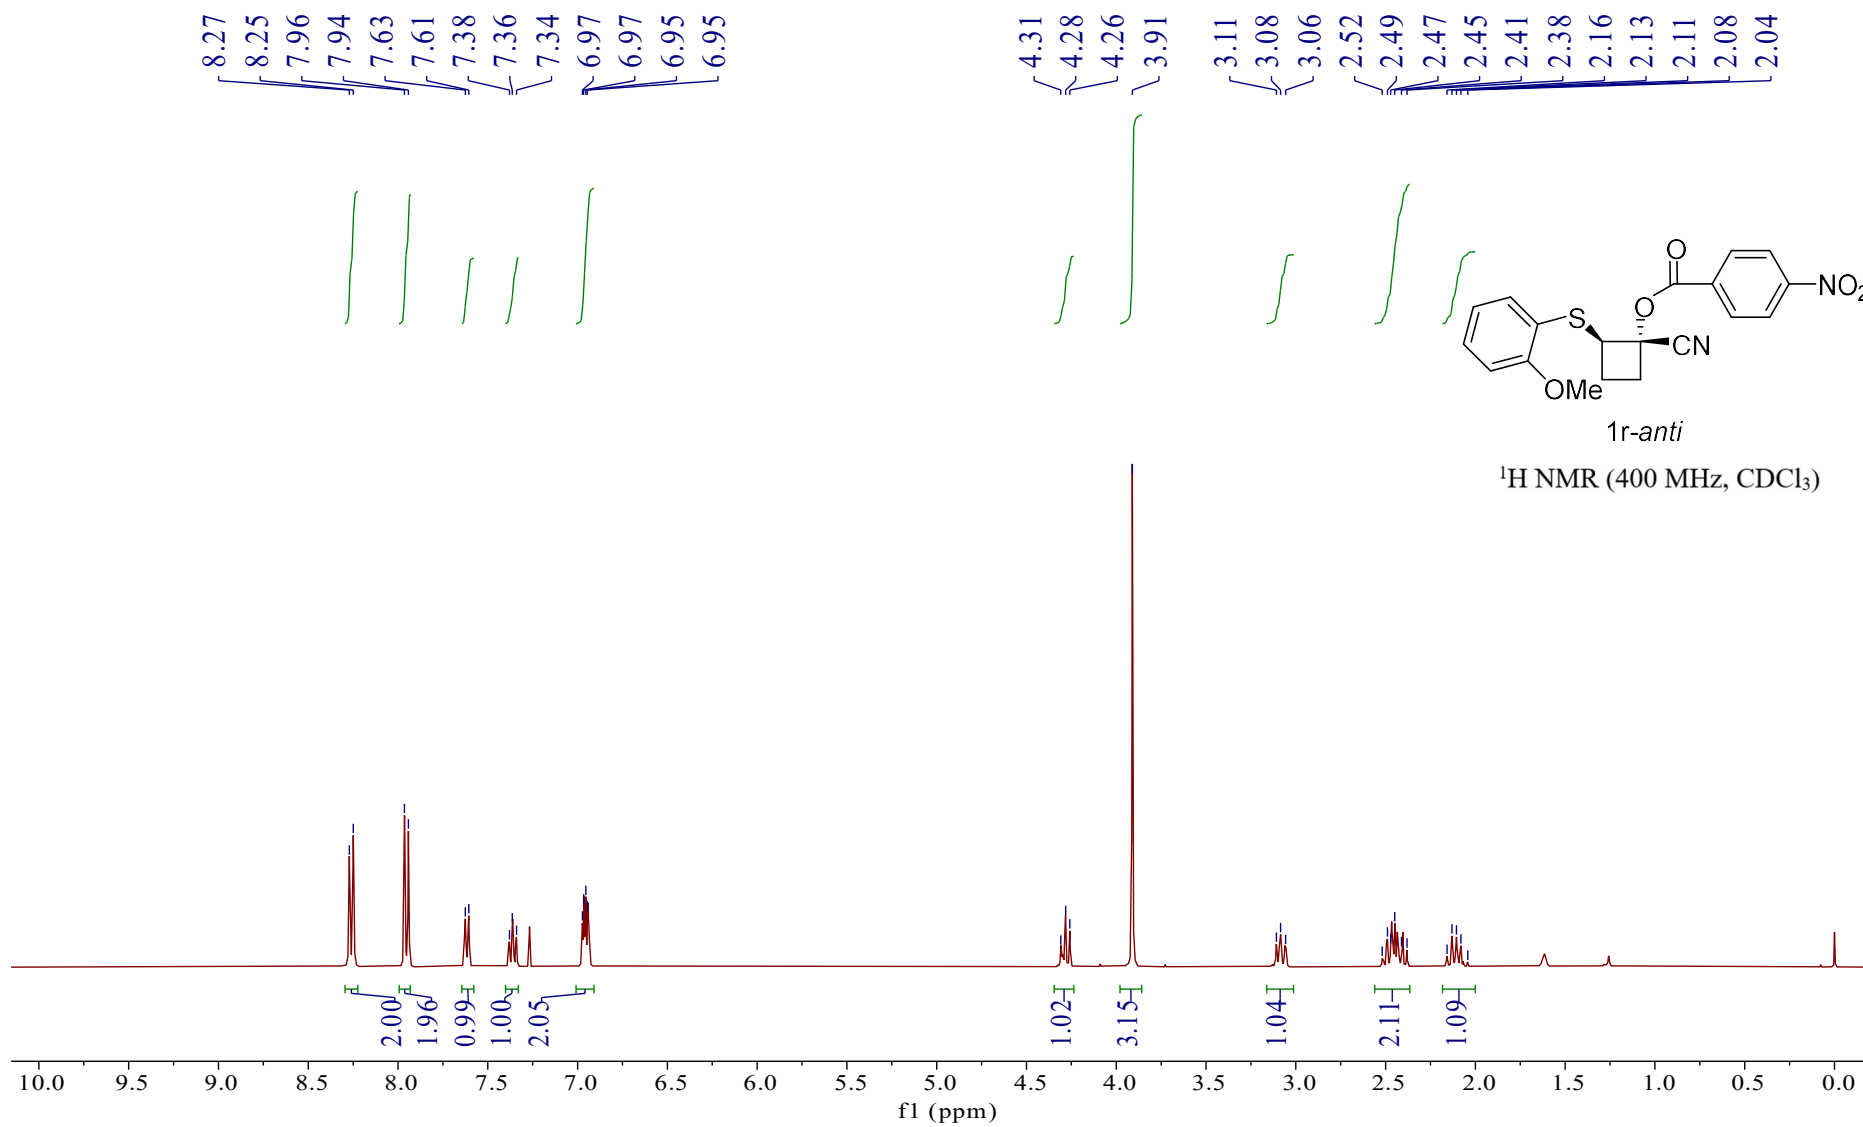

NMR-70

162.2  
158.8  
151.1

134.6  
133.7  
131.1  
130.0  
123.8  
121.3  
121.1  
115.8  
111.1

-77.4

-56.0

-48.5

-33.3

-22.1

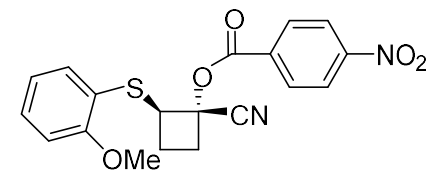

1r-anti

<sup>13</sup>C NMR (100 MHz, CDCl<sub>3</sub>)

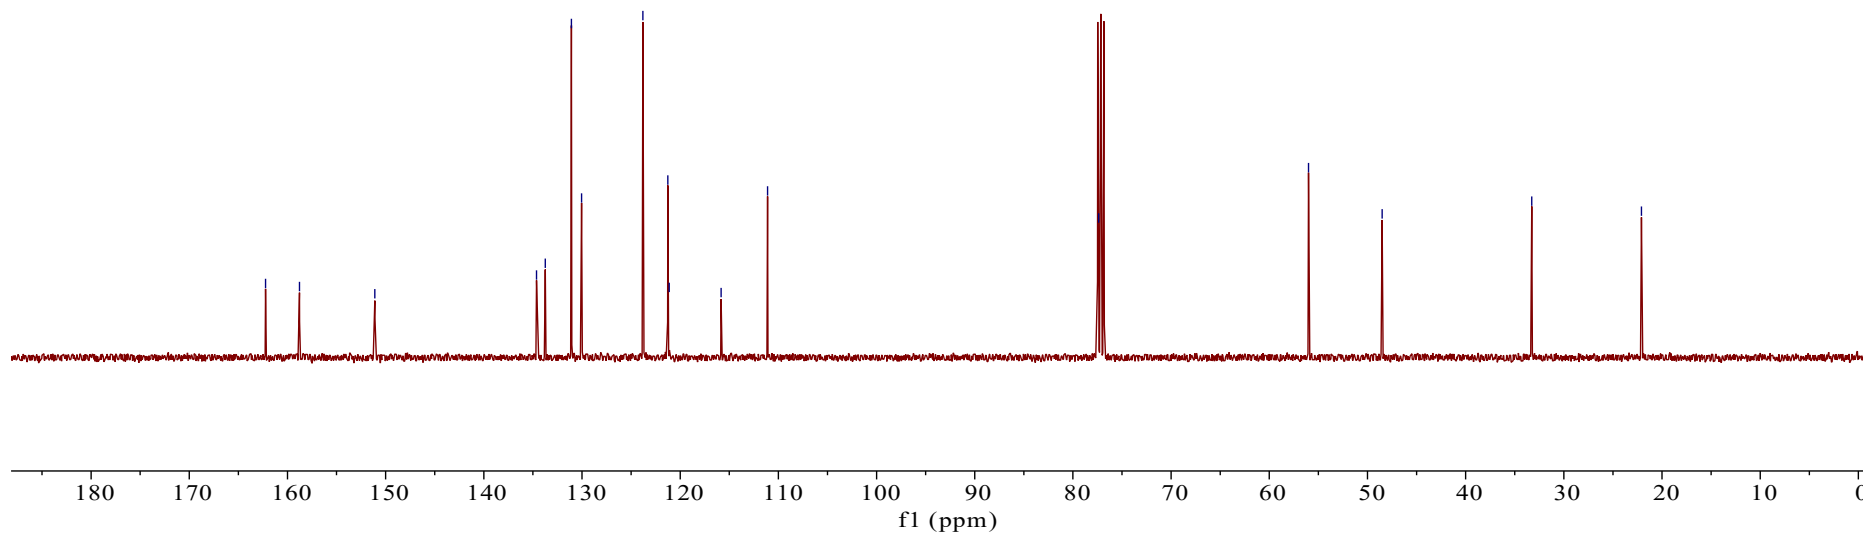

NMR-71

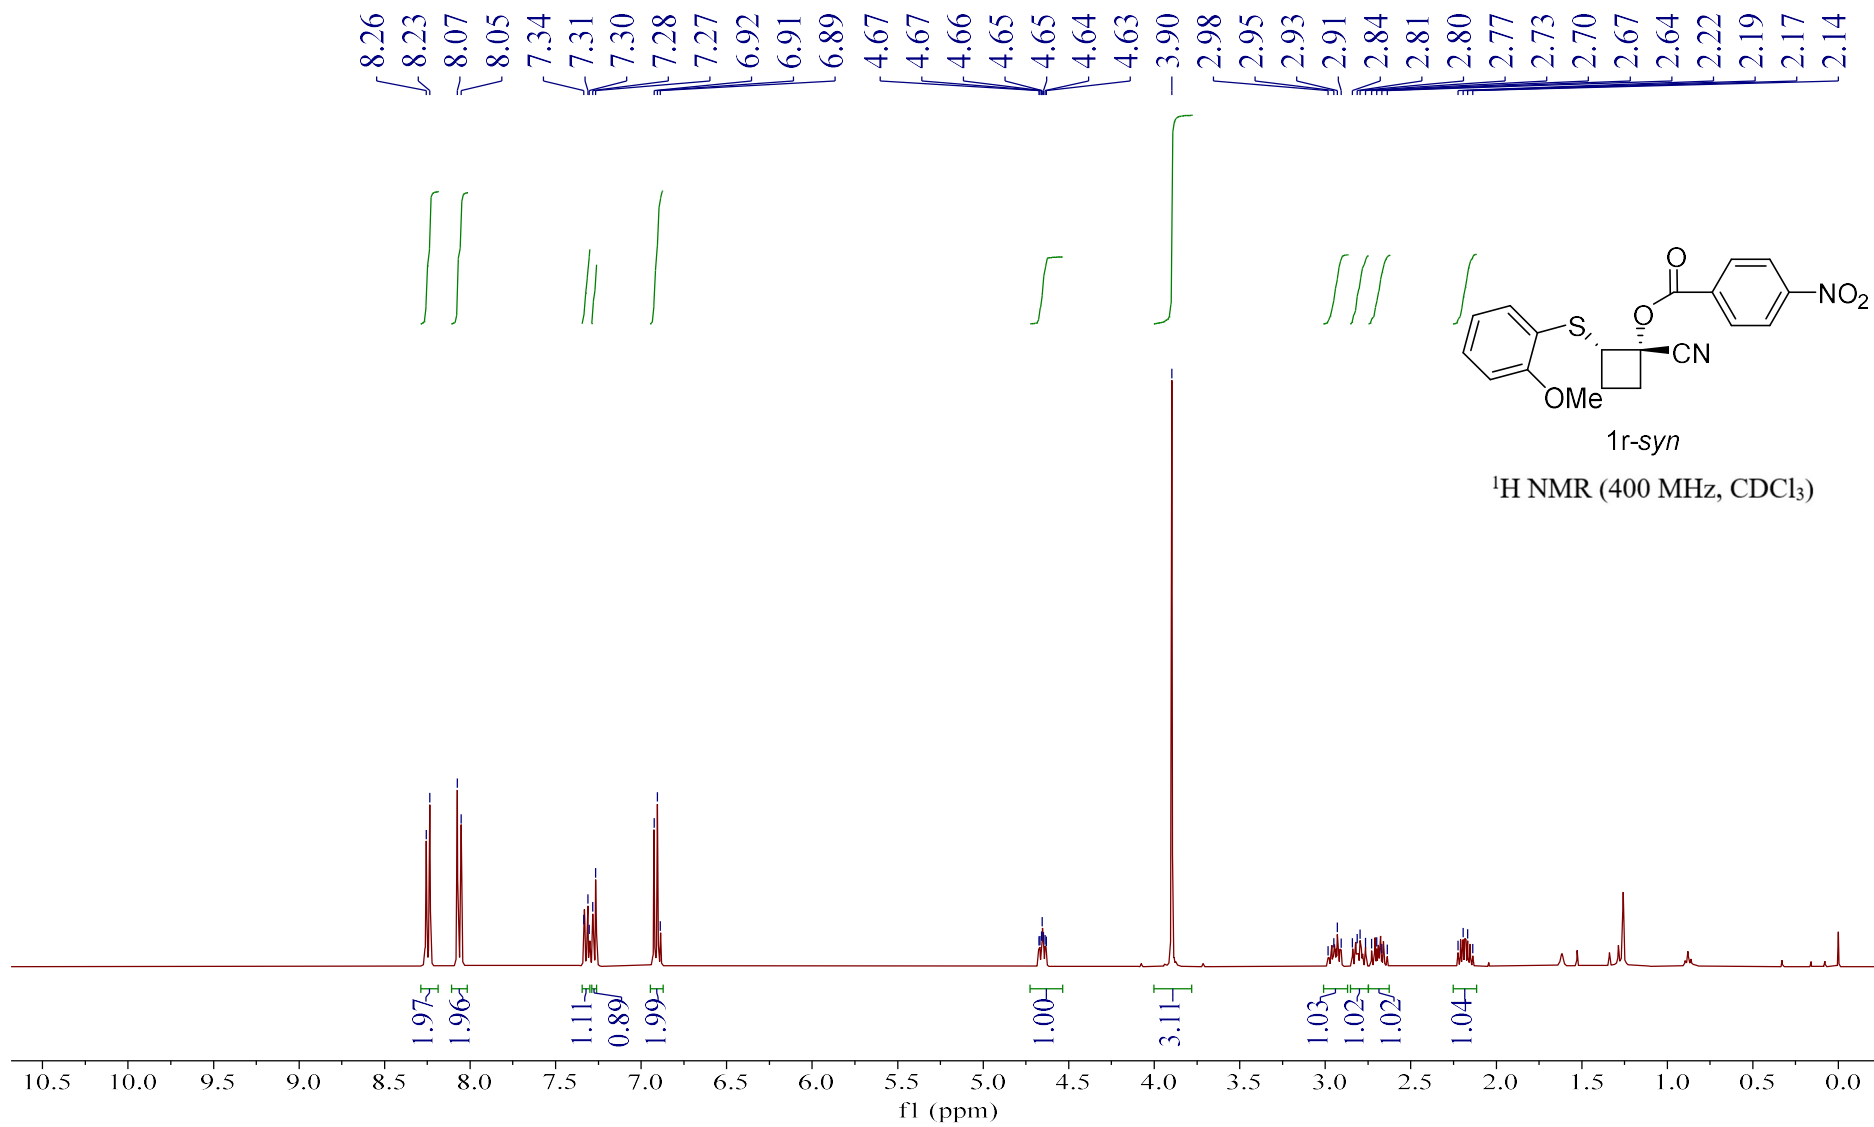

NMR-72

162.5  
157.9  
151.1

133.9  
131.4  
131.3  
129.0  
123.8  
122.0  
121.3  
117.9  
111.0

-70.7

-55.9

-49.5

-33.0

-23.7

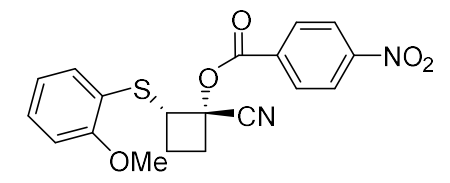

<sup>13</sup>C NMR (100 MHz, CDCl<sub>3</sub>)

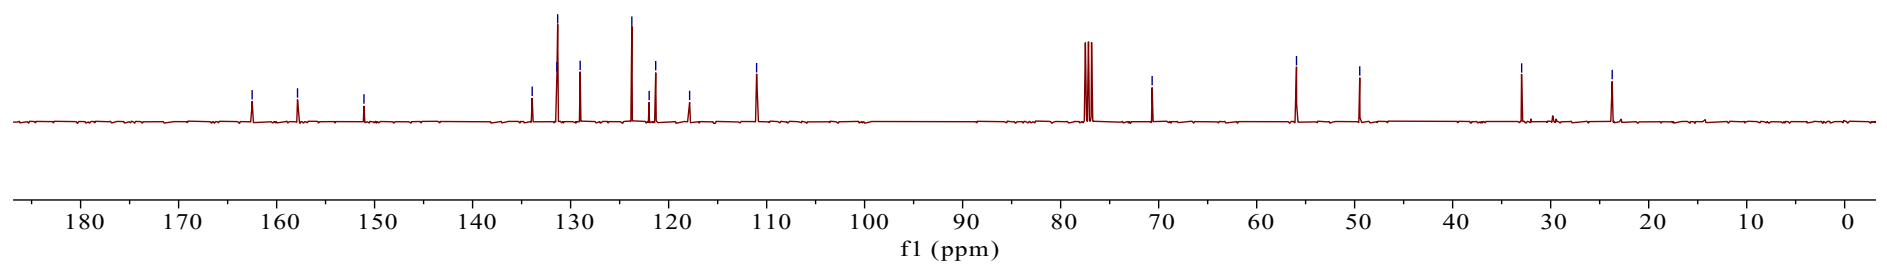

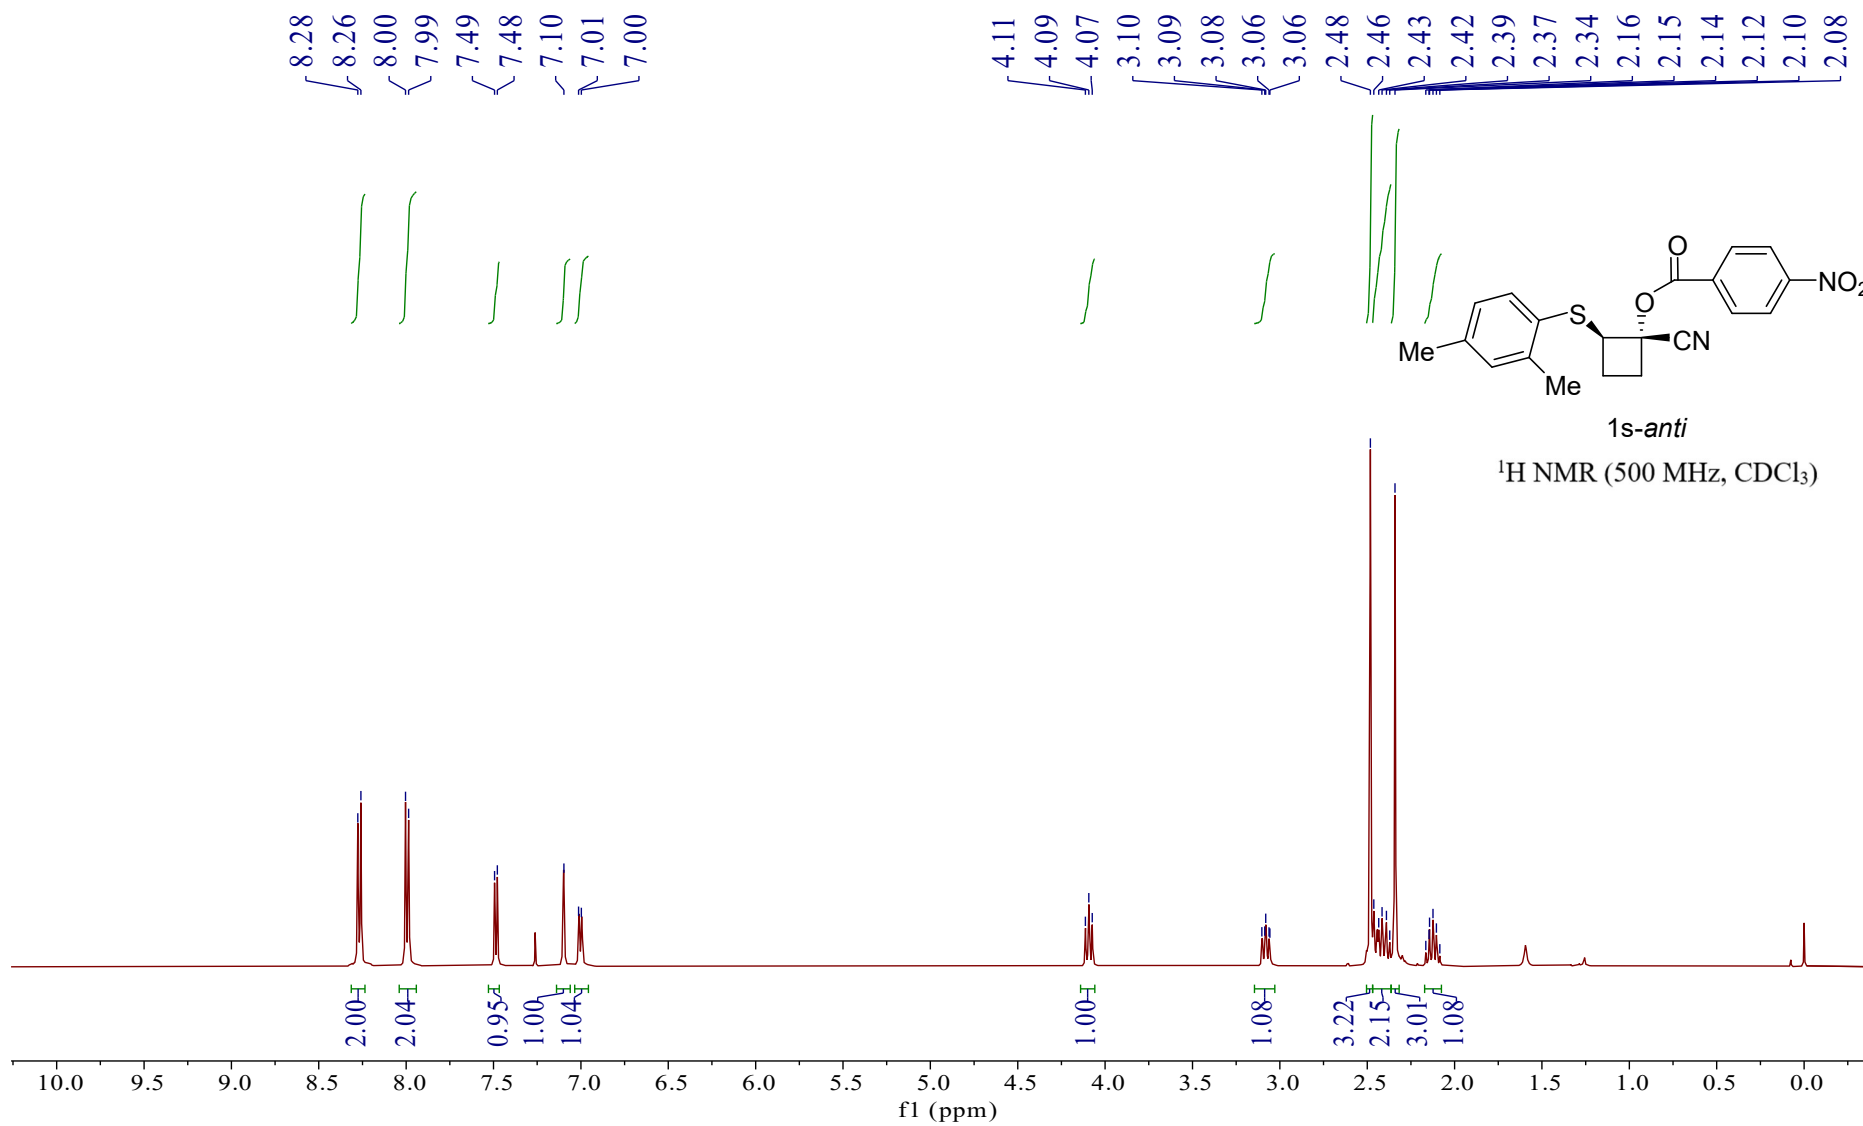

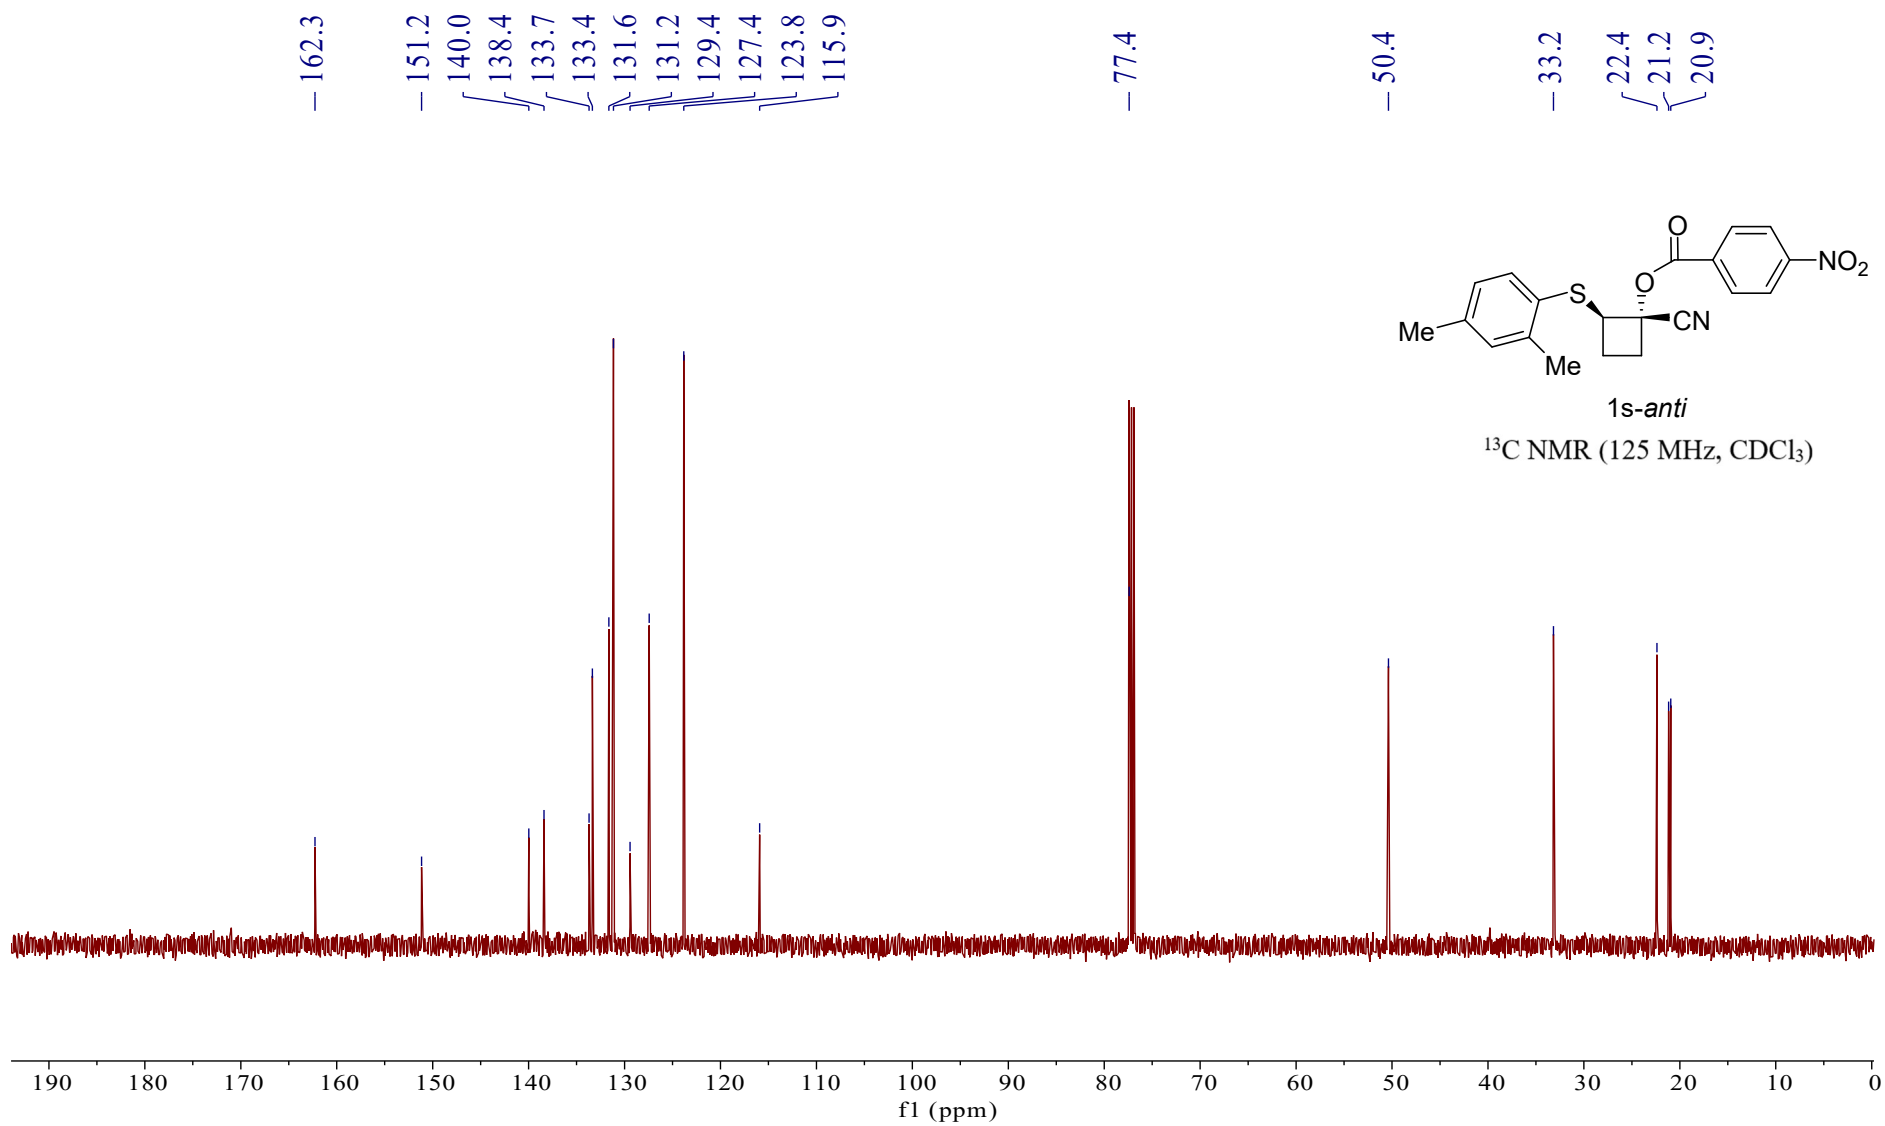

NMR-75

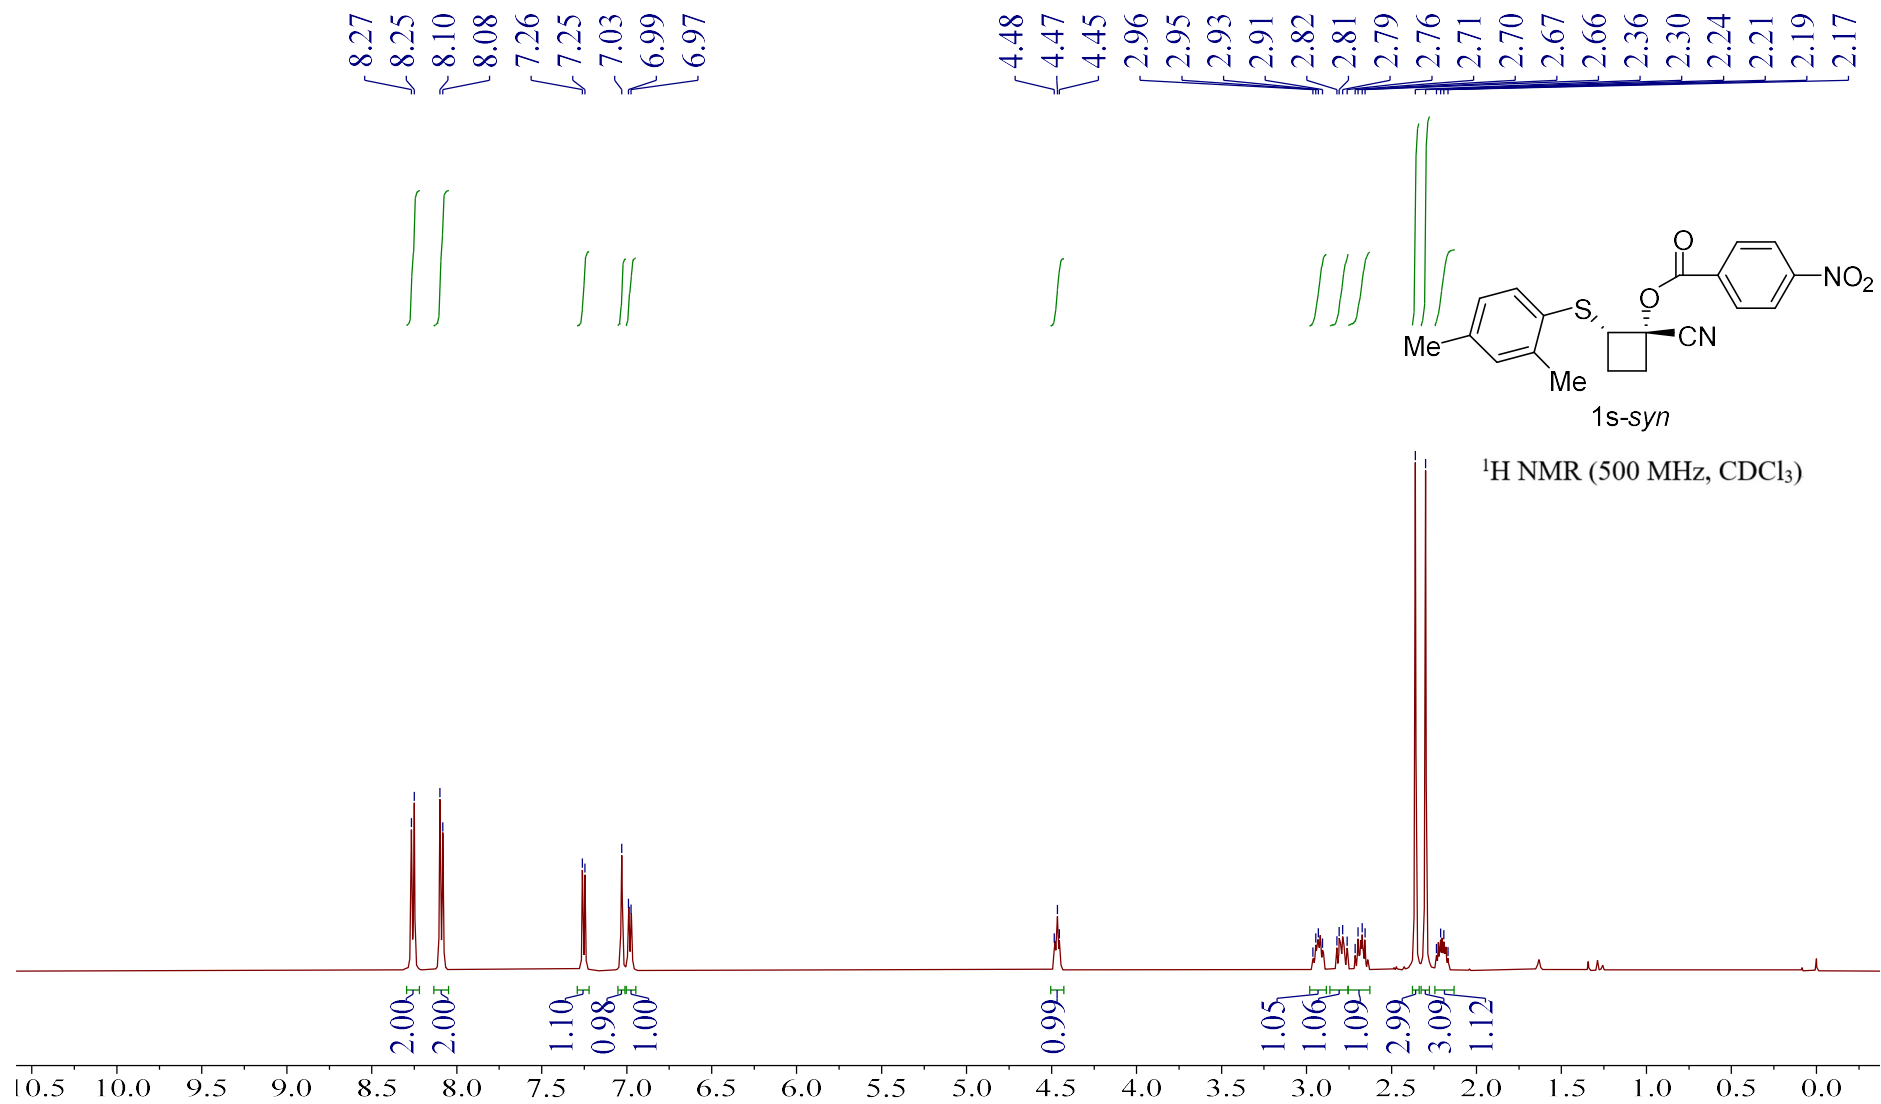



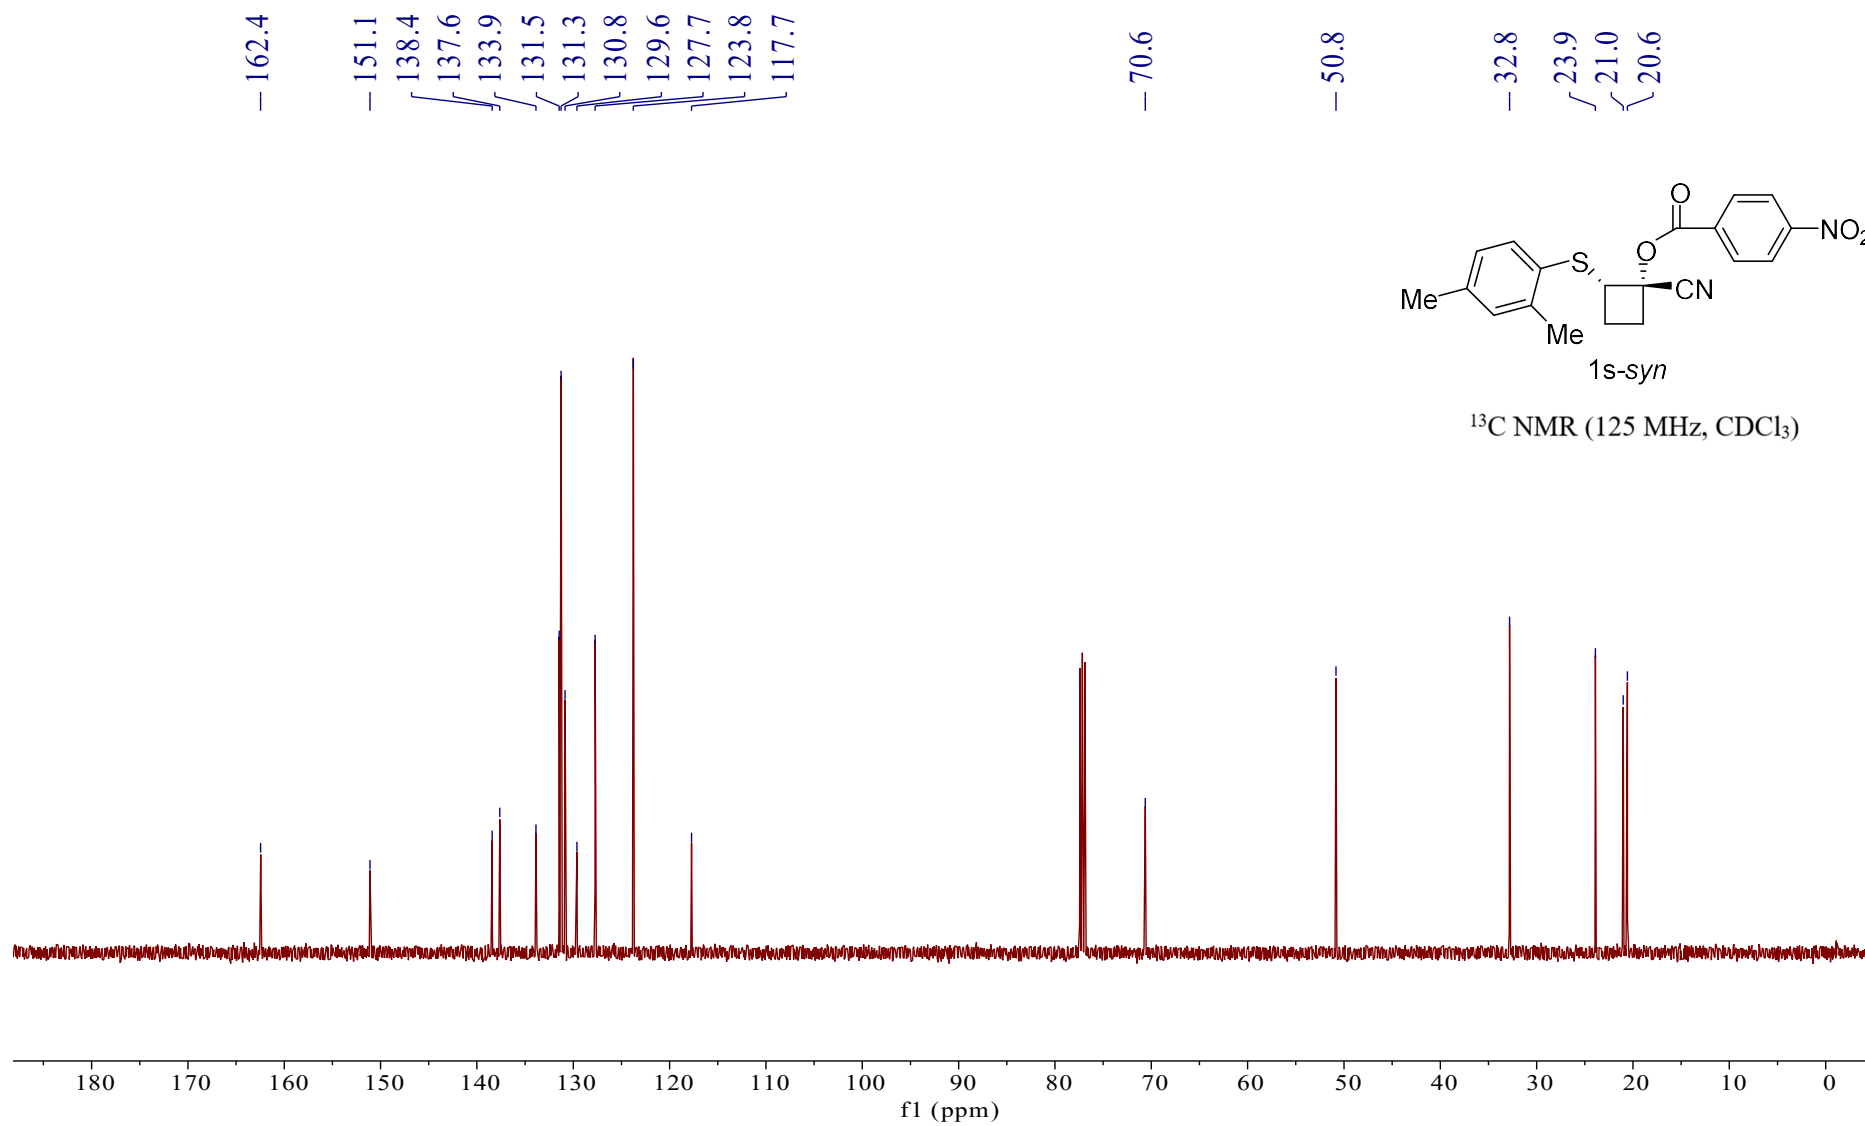

NMR-77

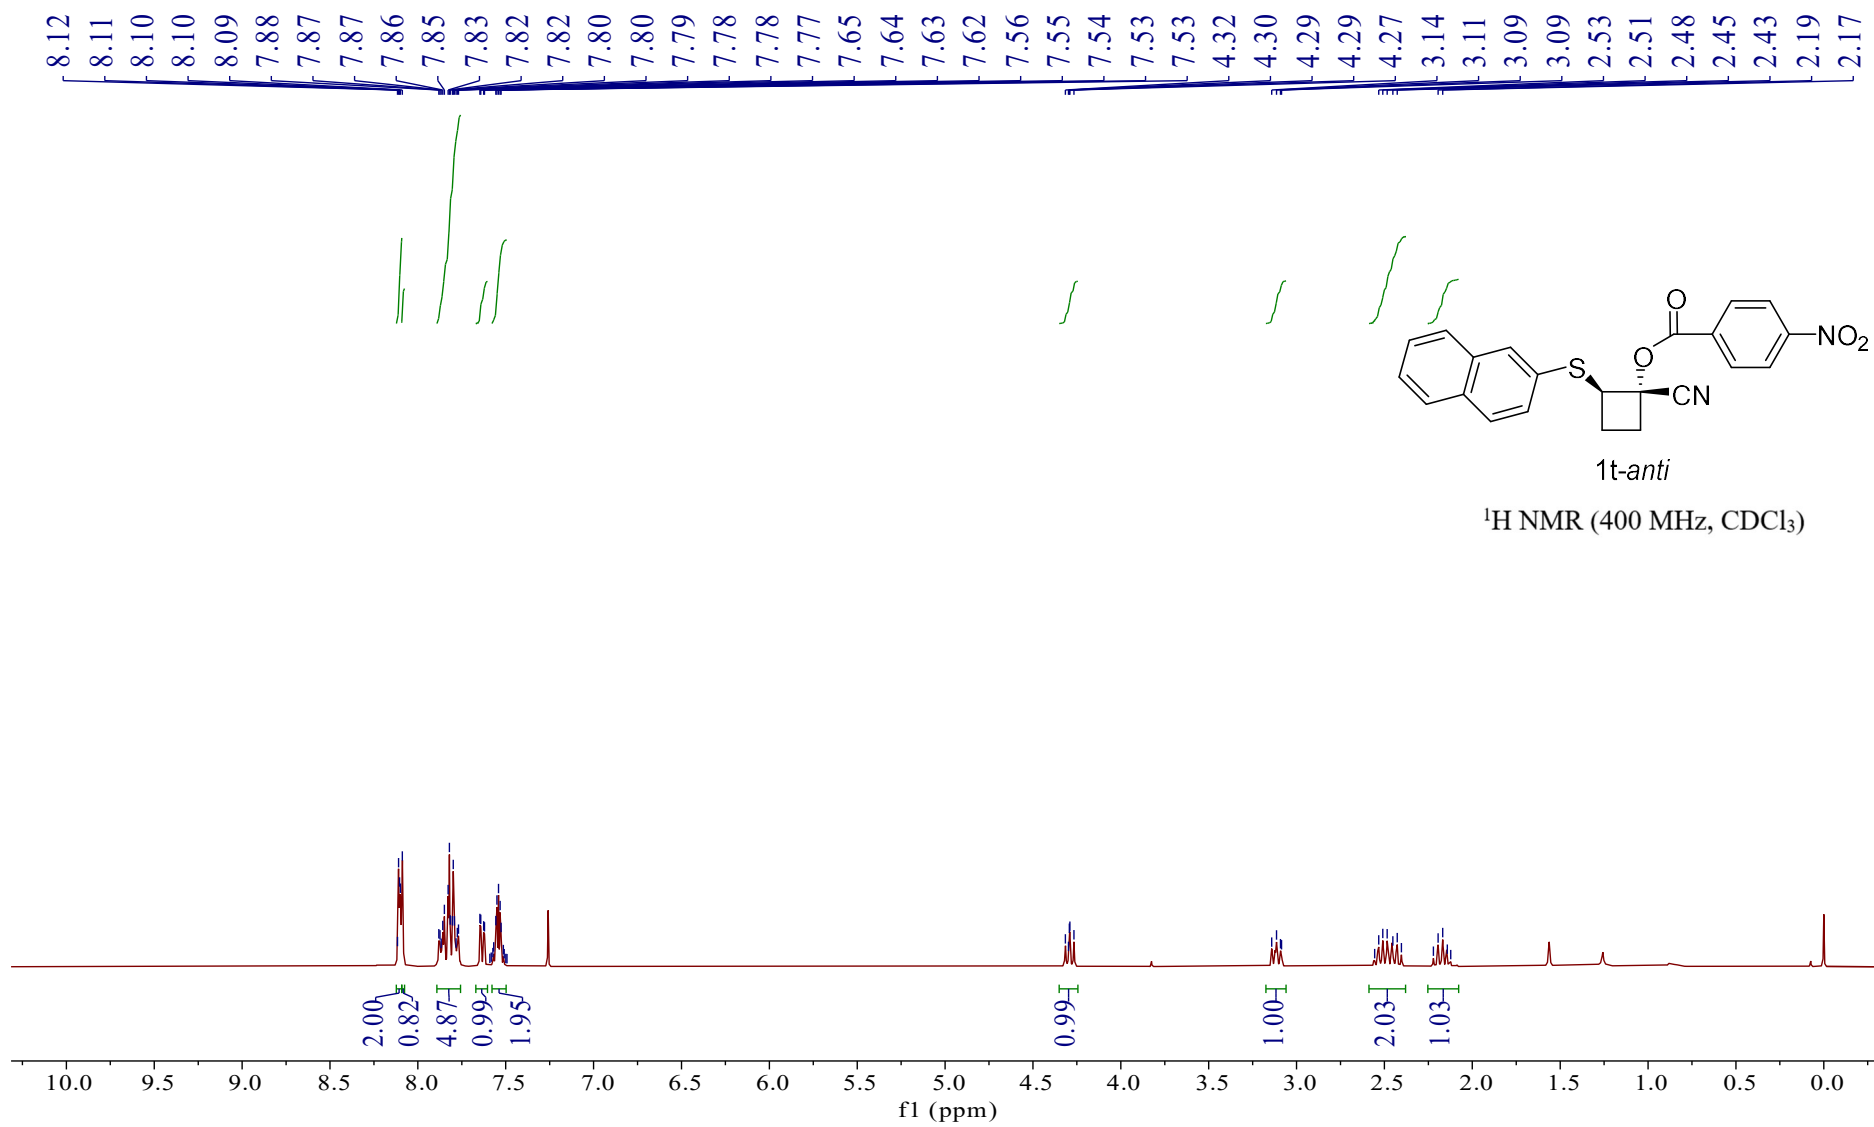

NMR-78

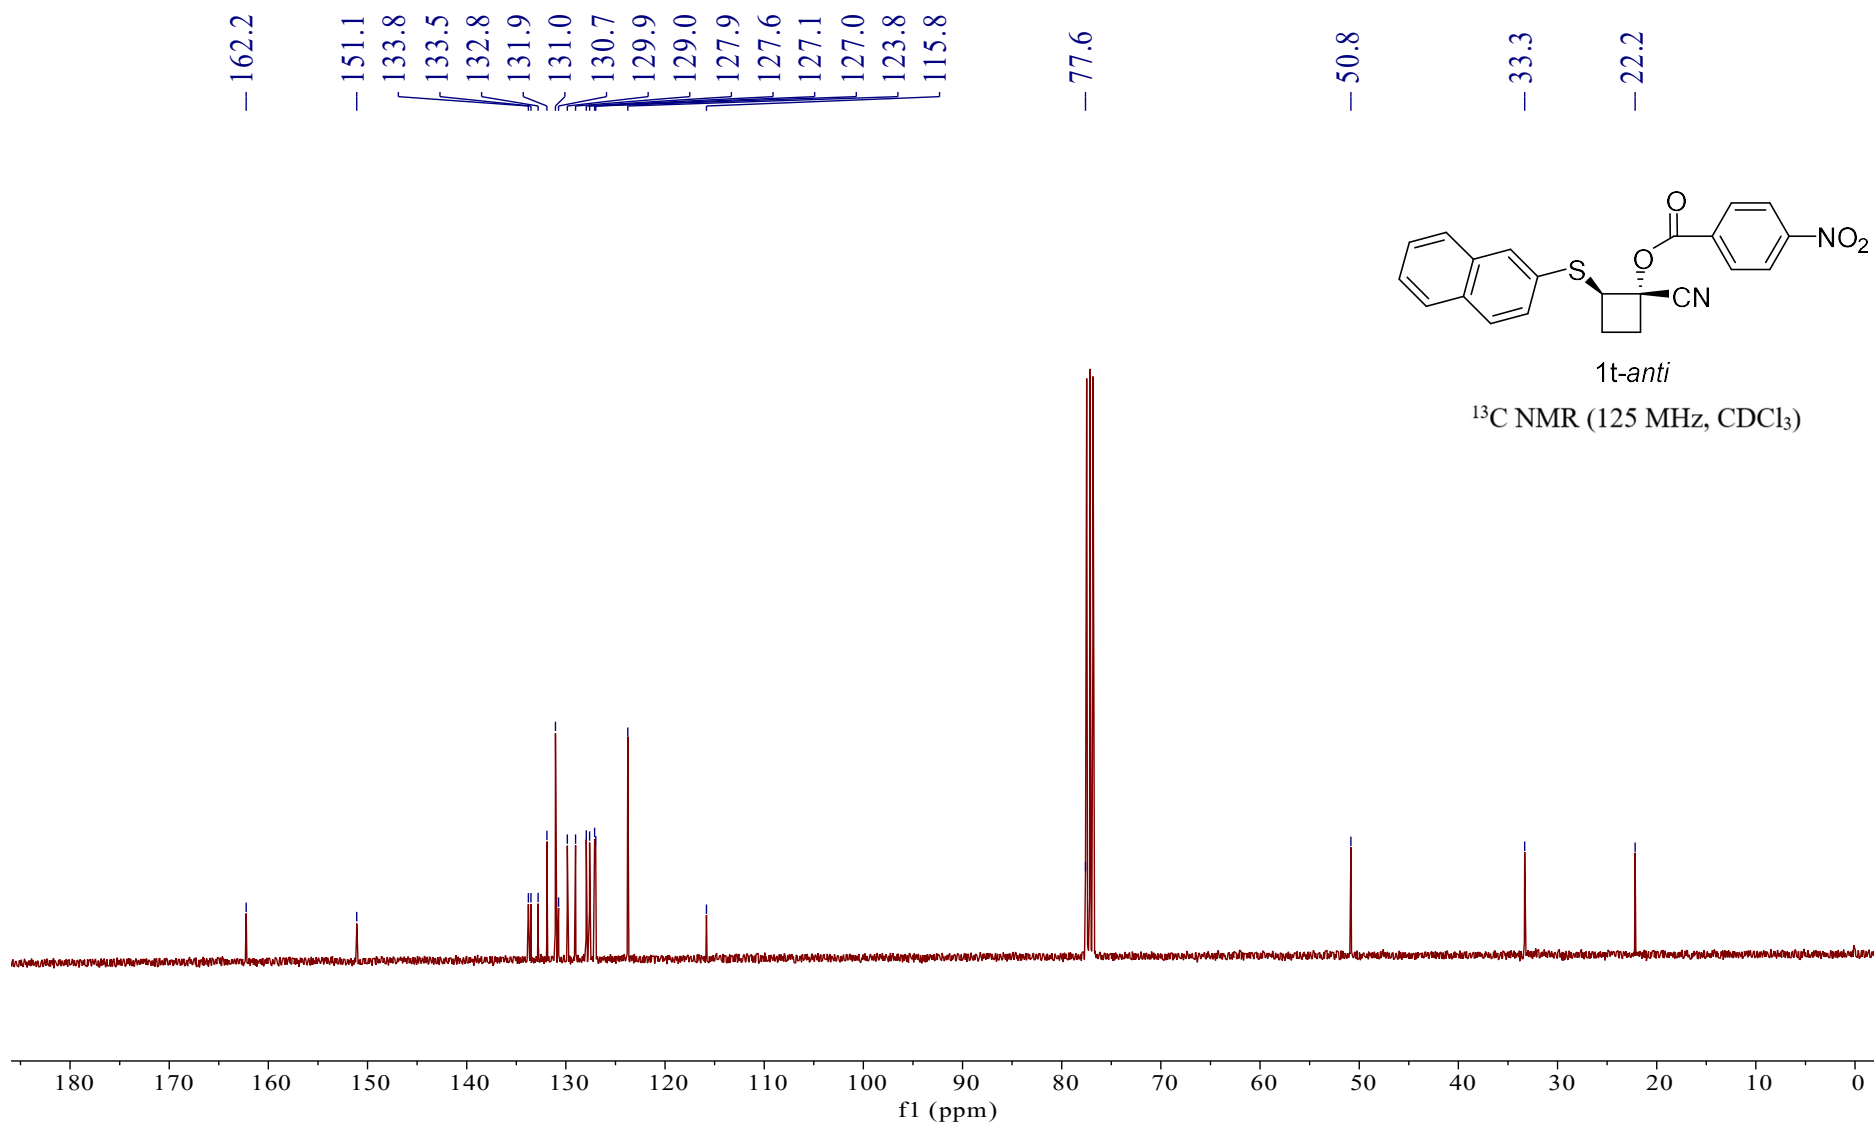

NMR-79

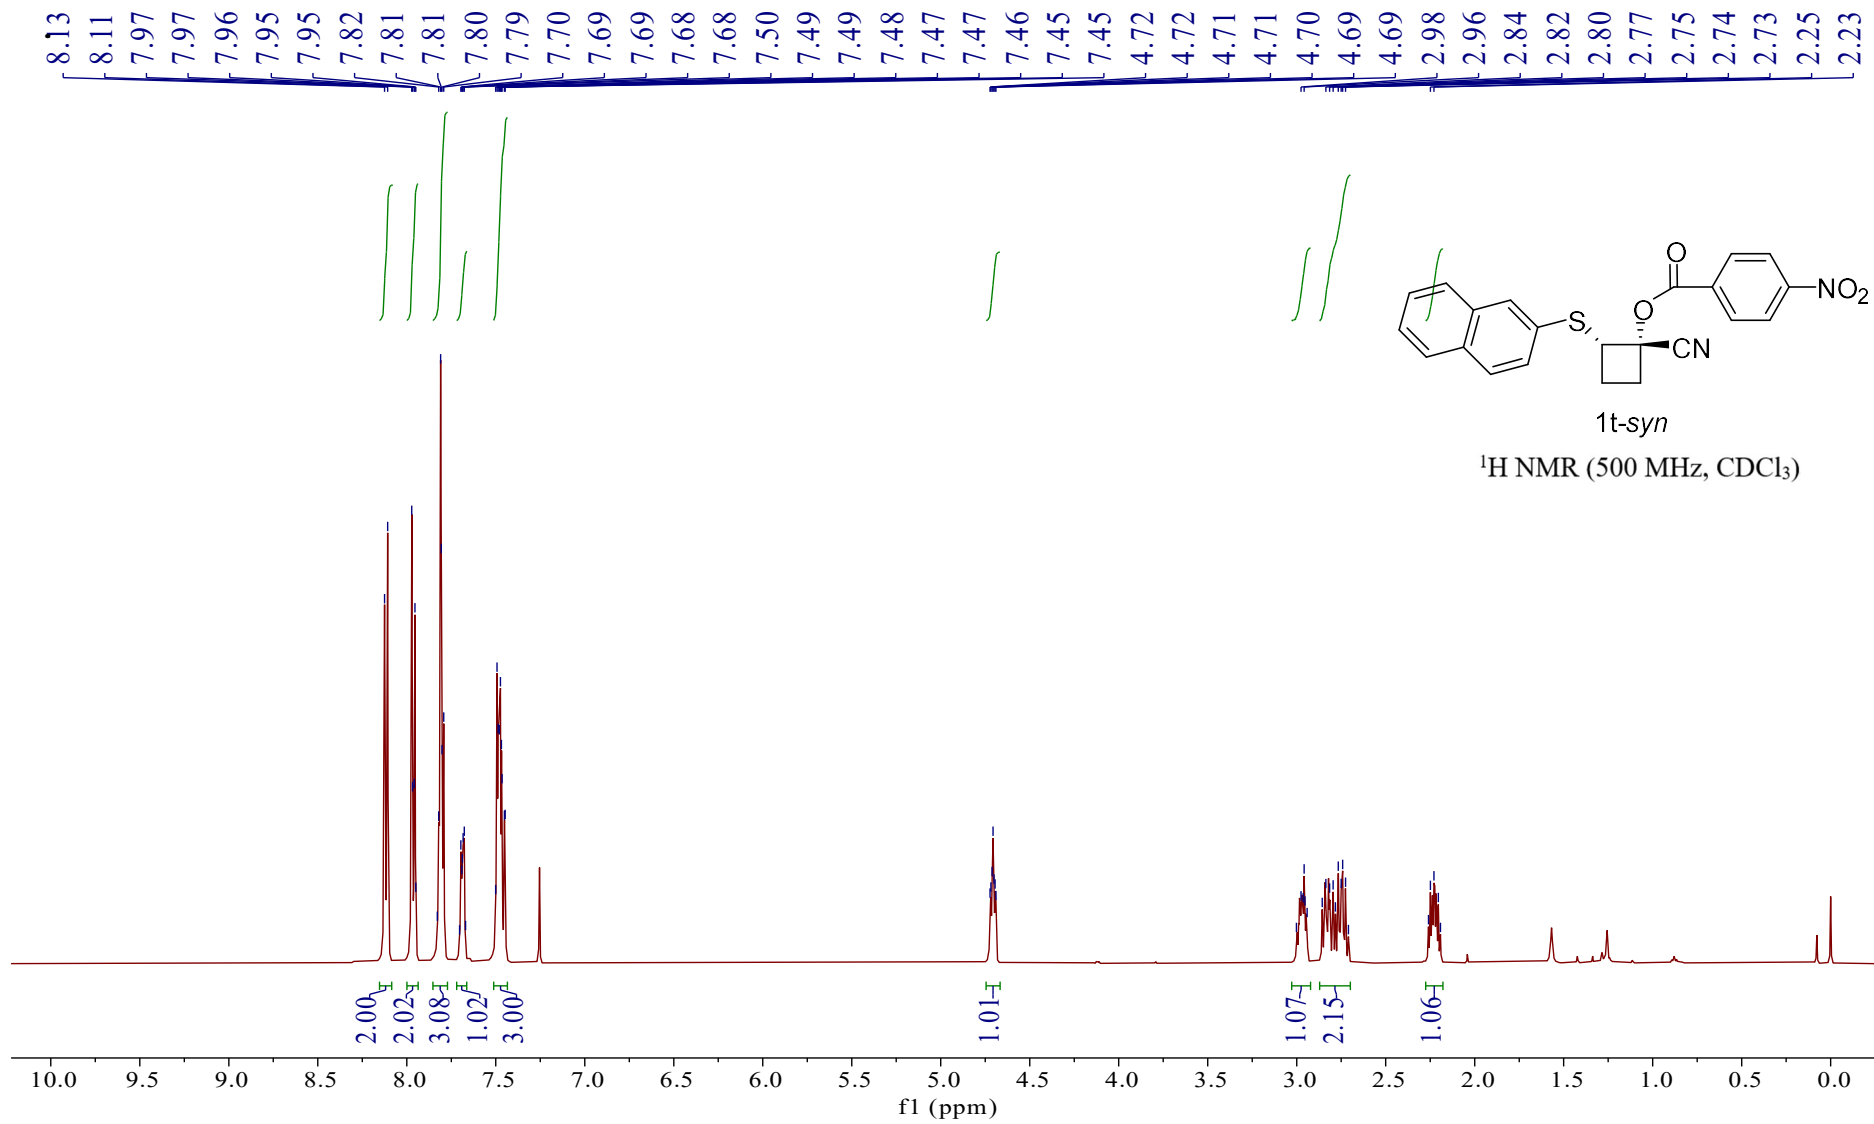

NMR-80

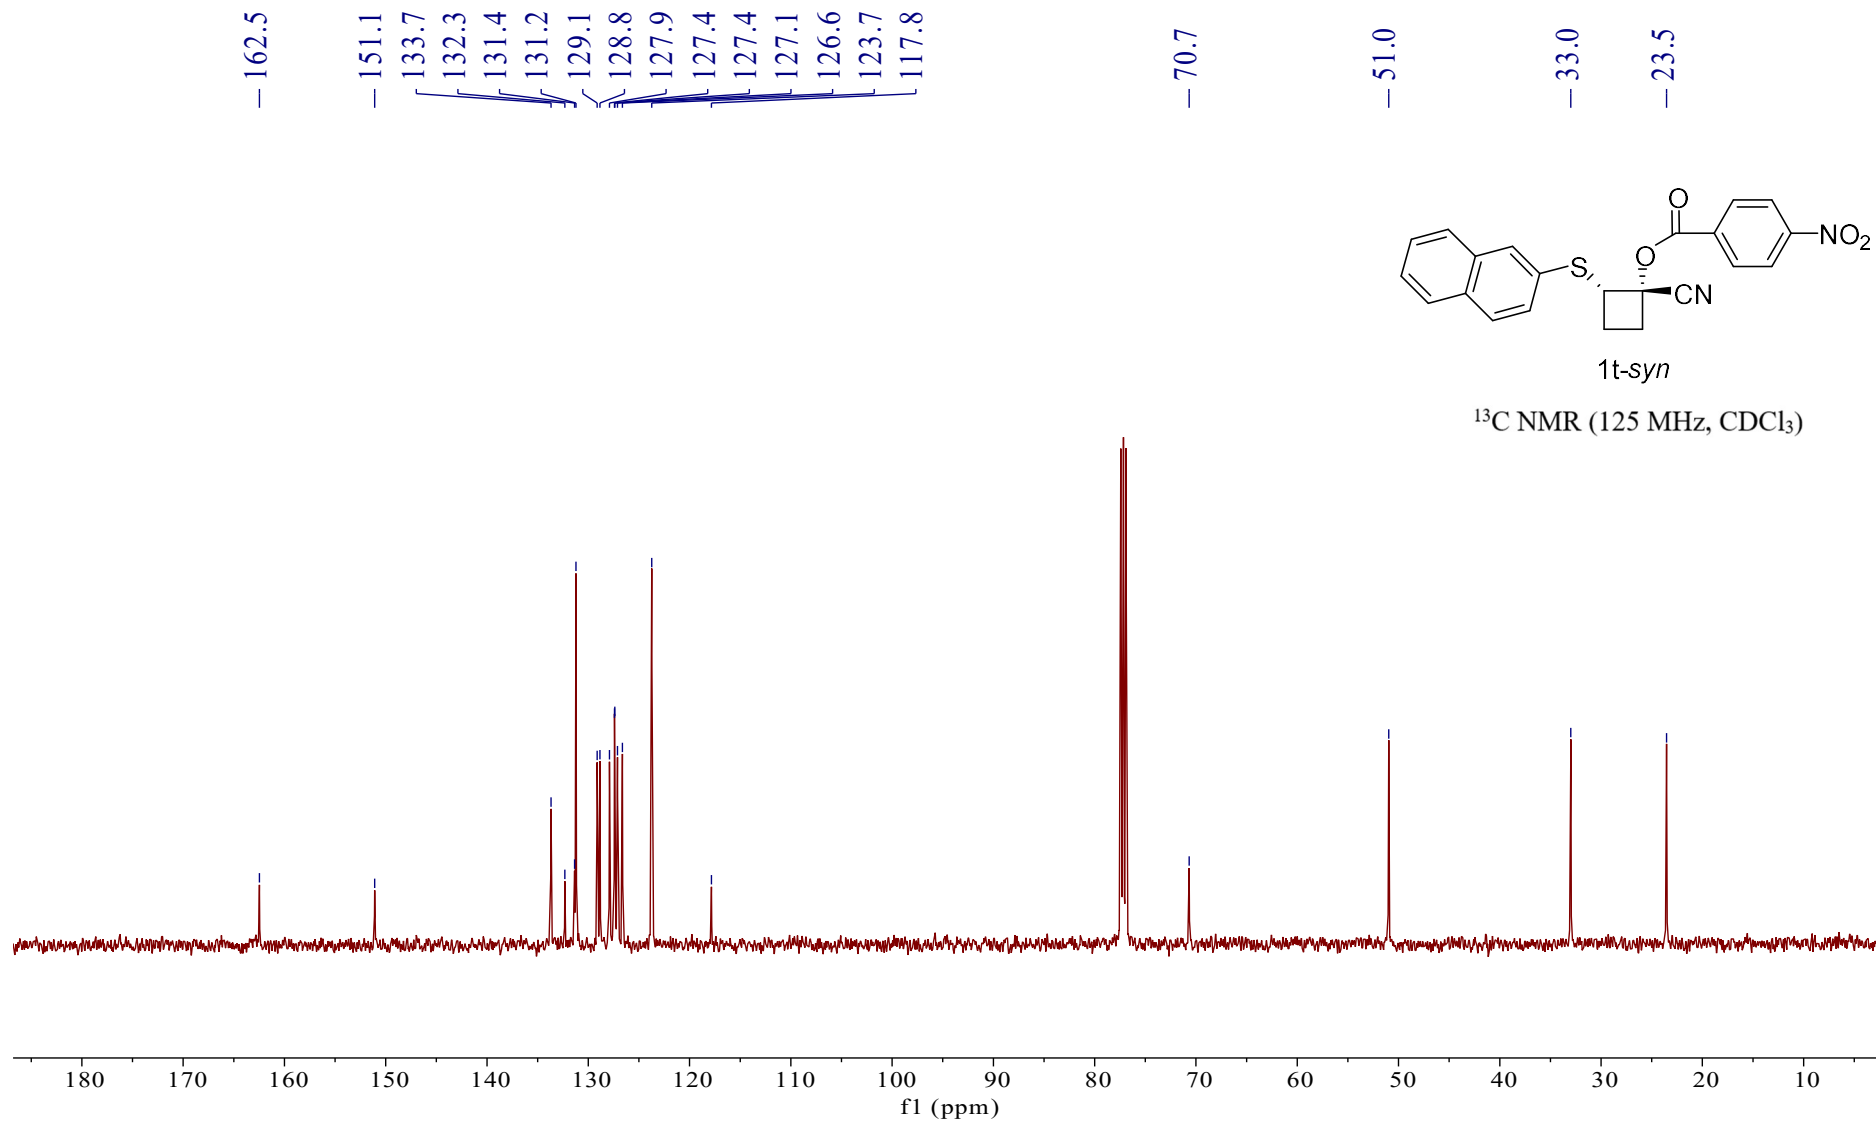

NMR-81

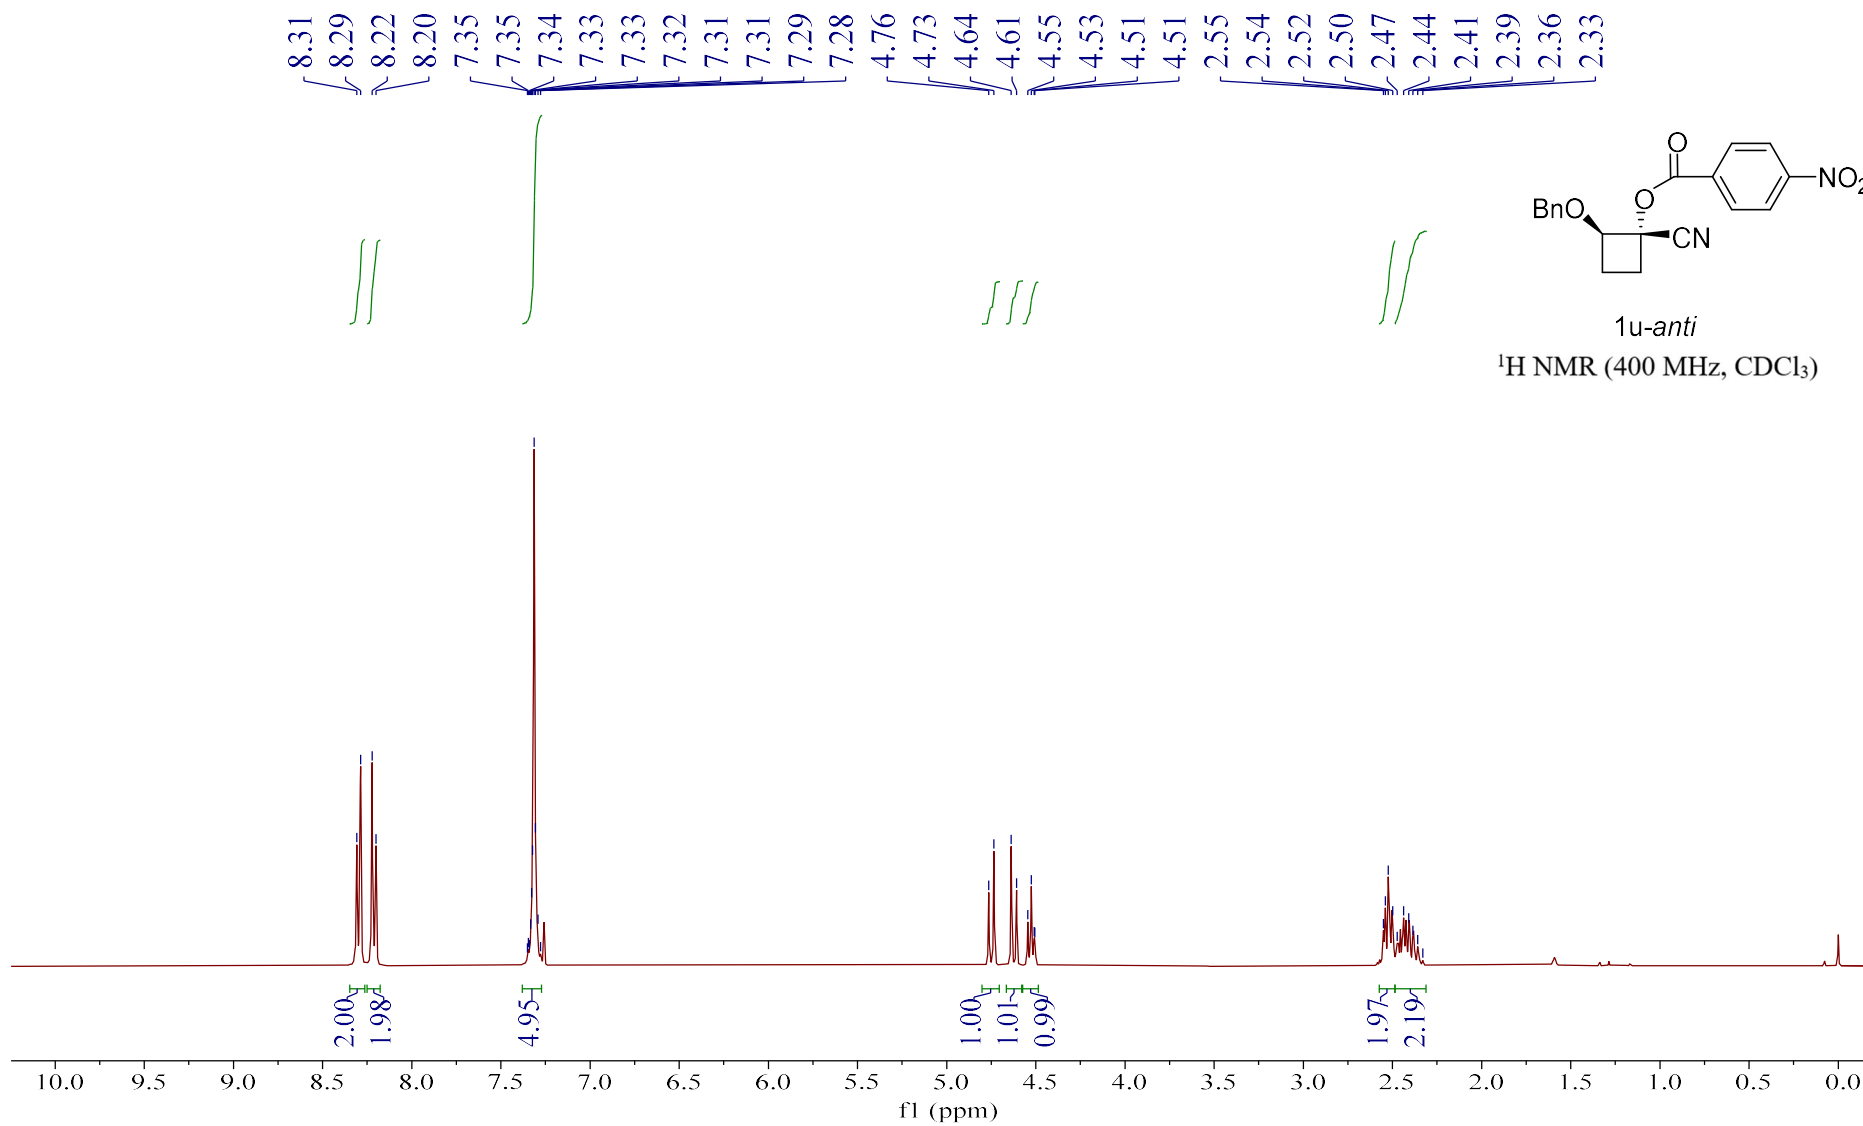

NMR-82

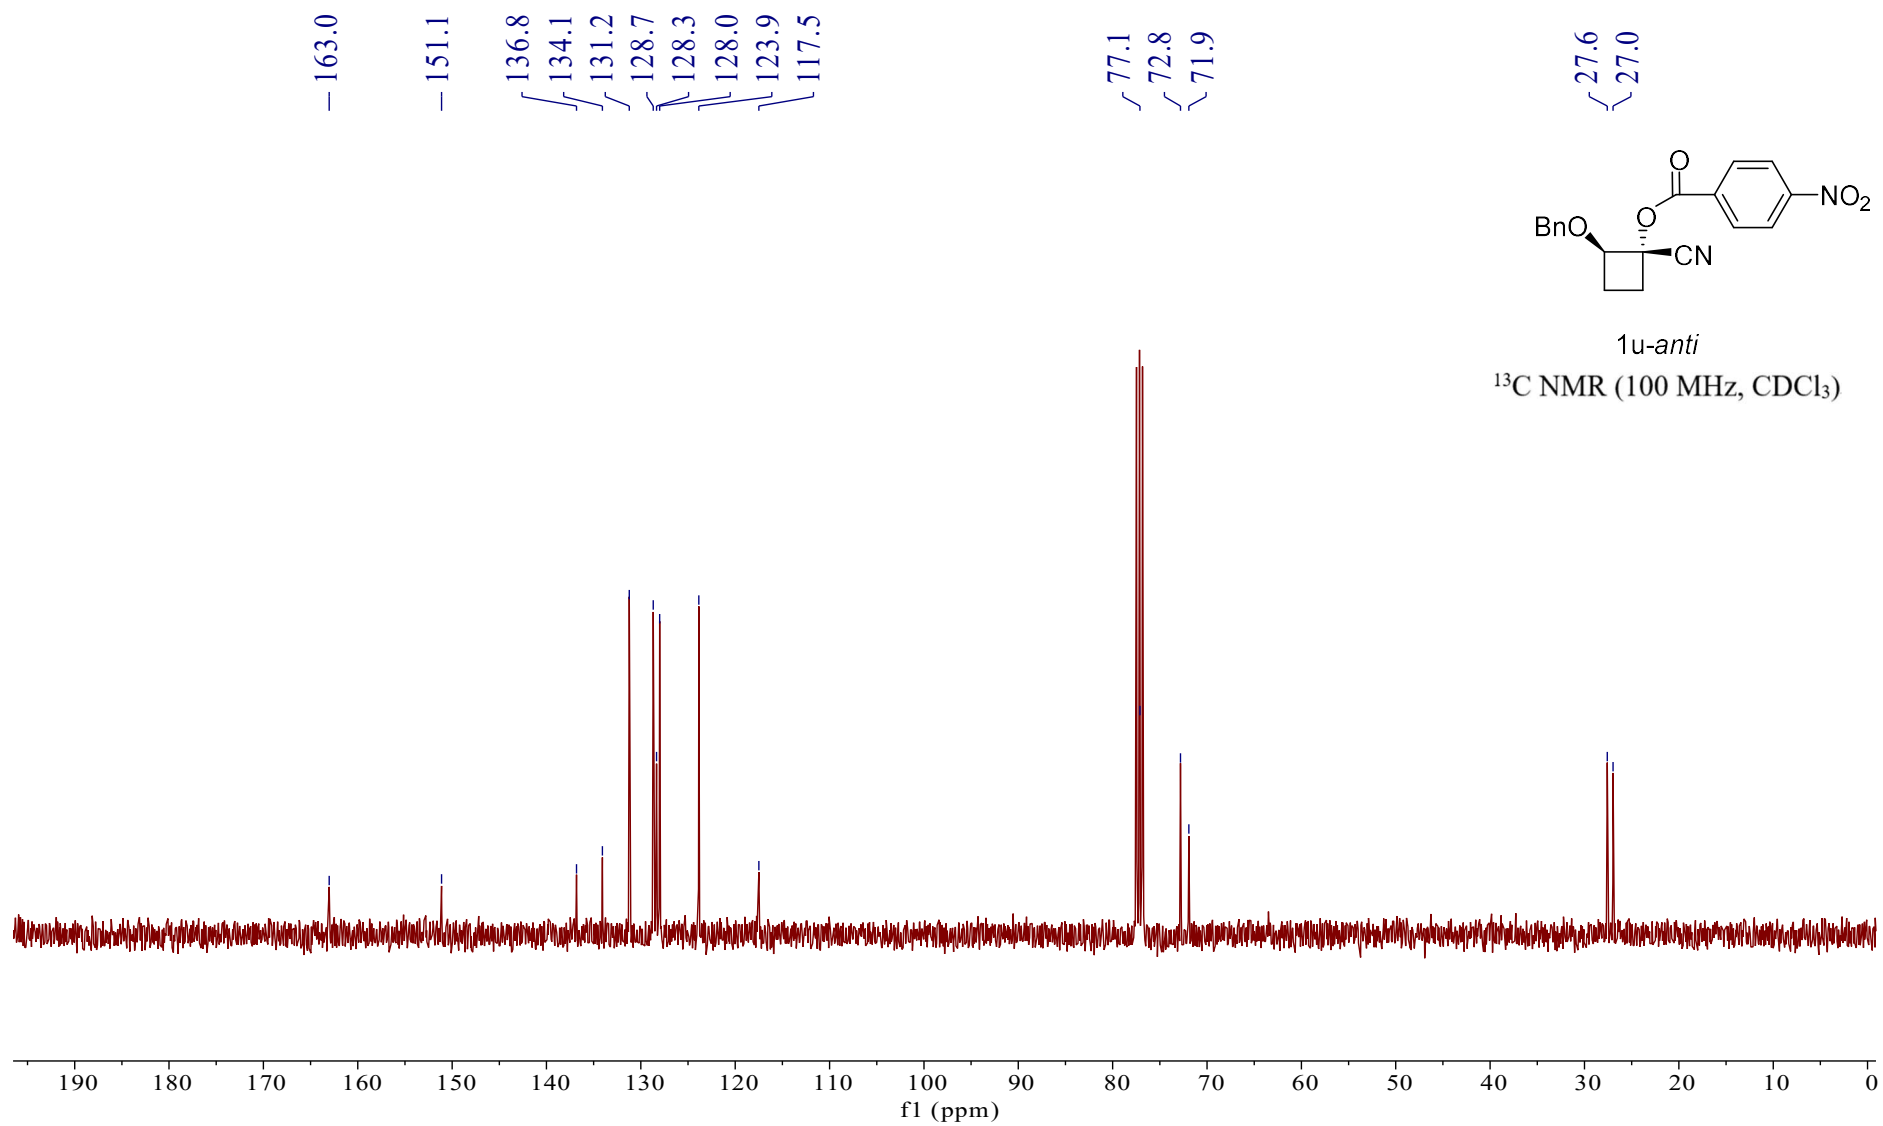

NMR-83

8.35  
8.33  
8.25  
8.24  
7.45  
7.43  
7.42  
7.39  
7.37  
7.36  
7.35

4.12  
4.10  
4.08  
3.09  
3.08  
3.07  
3.07  
3.05  
2.57  
2.55  
2.53  
2.51  
2.50  
2.48  
2.46  
2.44  
2.42

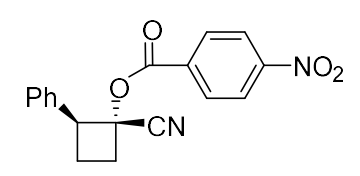

7a-anti

<sup>1</sup>H NMR (500 MHz, CDCl<sub>3</sub>)

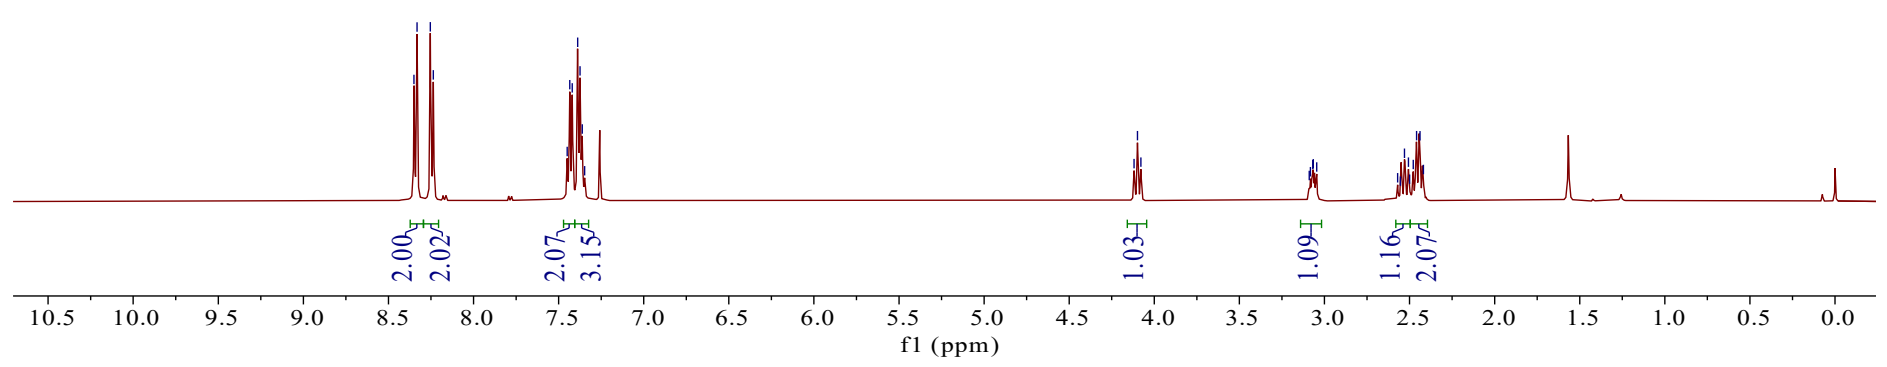



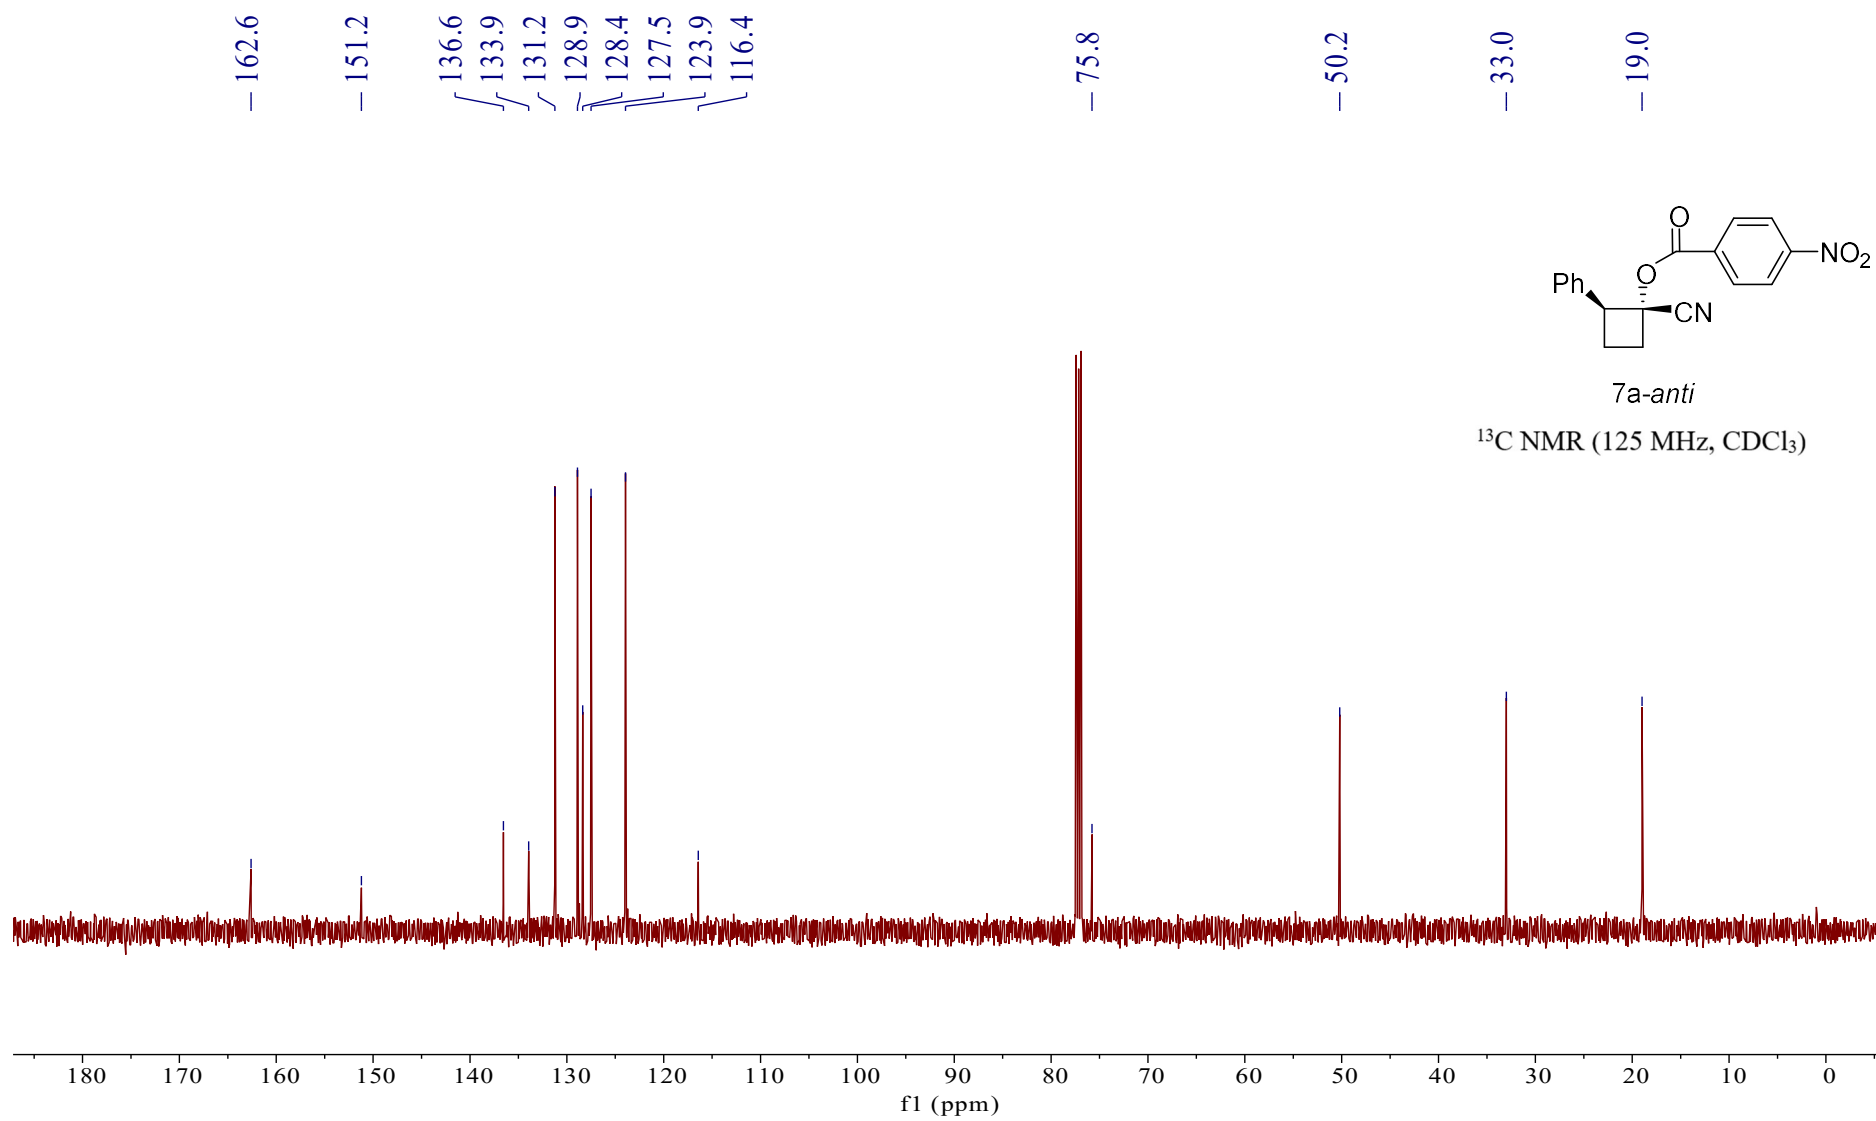

NMR-85

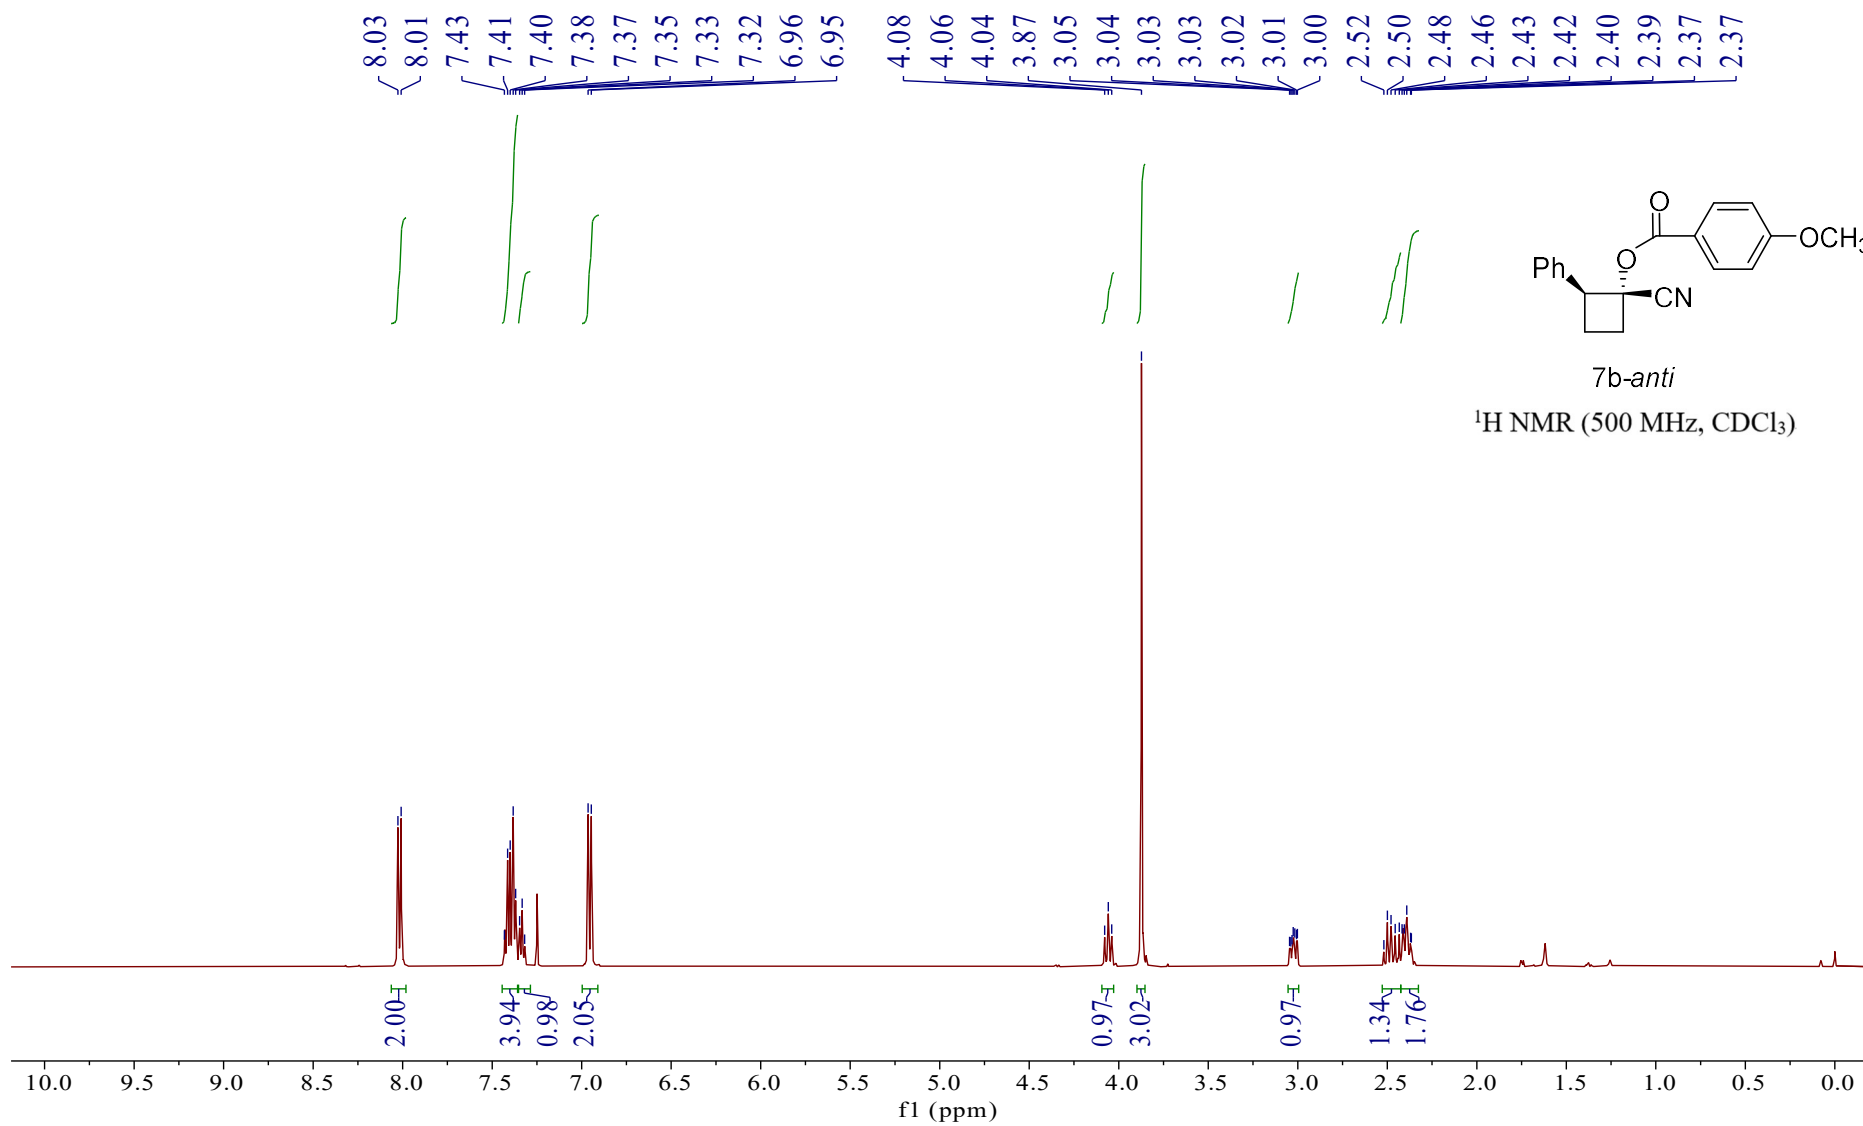

NMR-86

164.2  
164.1

137.1  
132.2  
128.7  
128.0  
127.5  
120.8  
117.1  
114.0

-74.8

-55.6  
-50.0

-33.1

-19.0

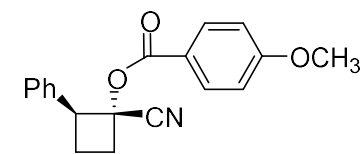

7b-anti

<sup>13</sup>C NMR (125 MHz, CDCl<sub>3</sub>)

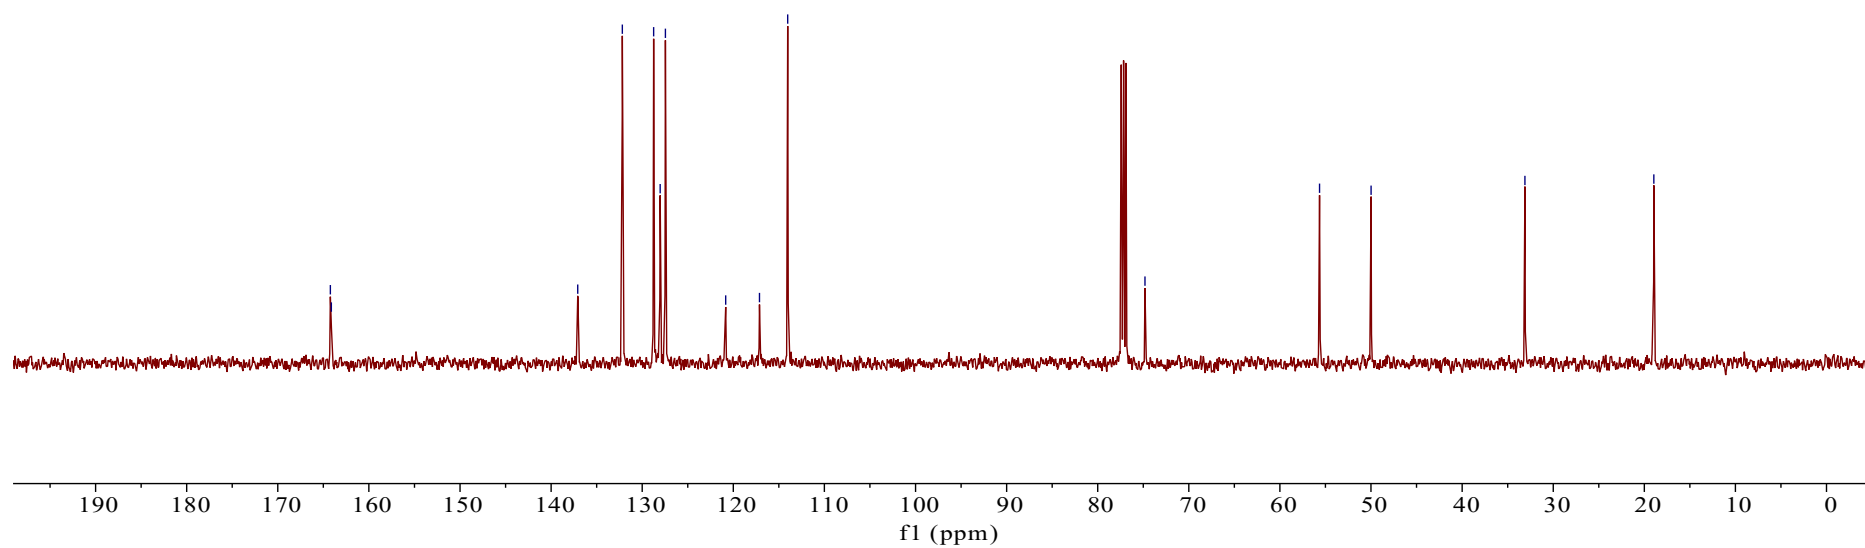

NMR-87

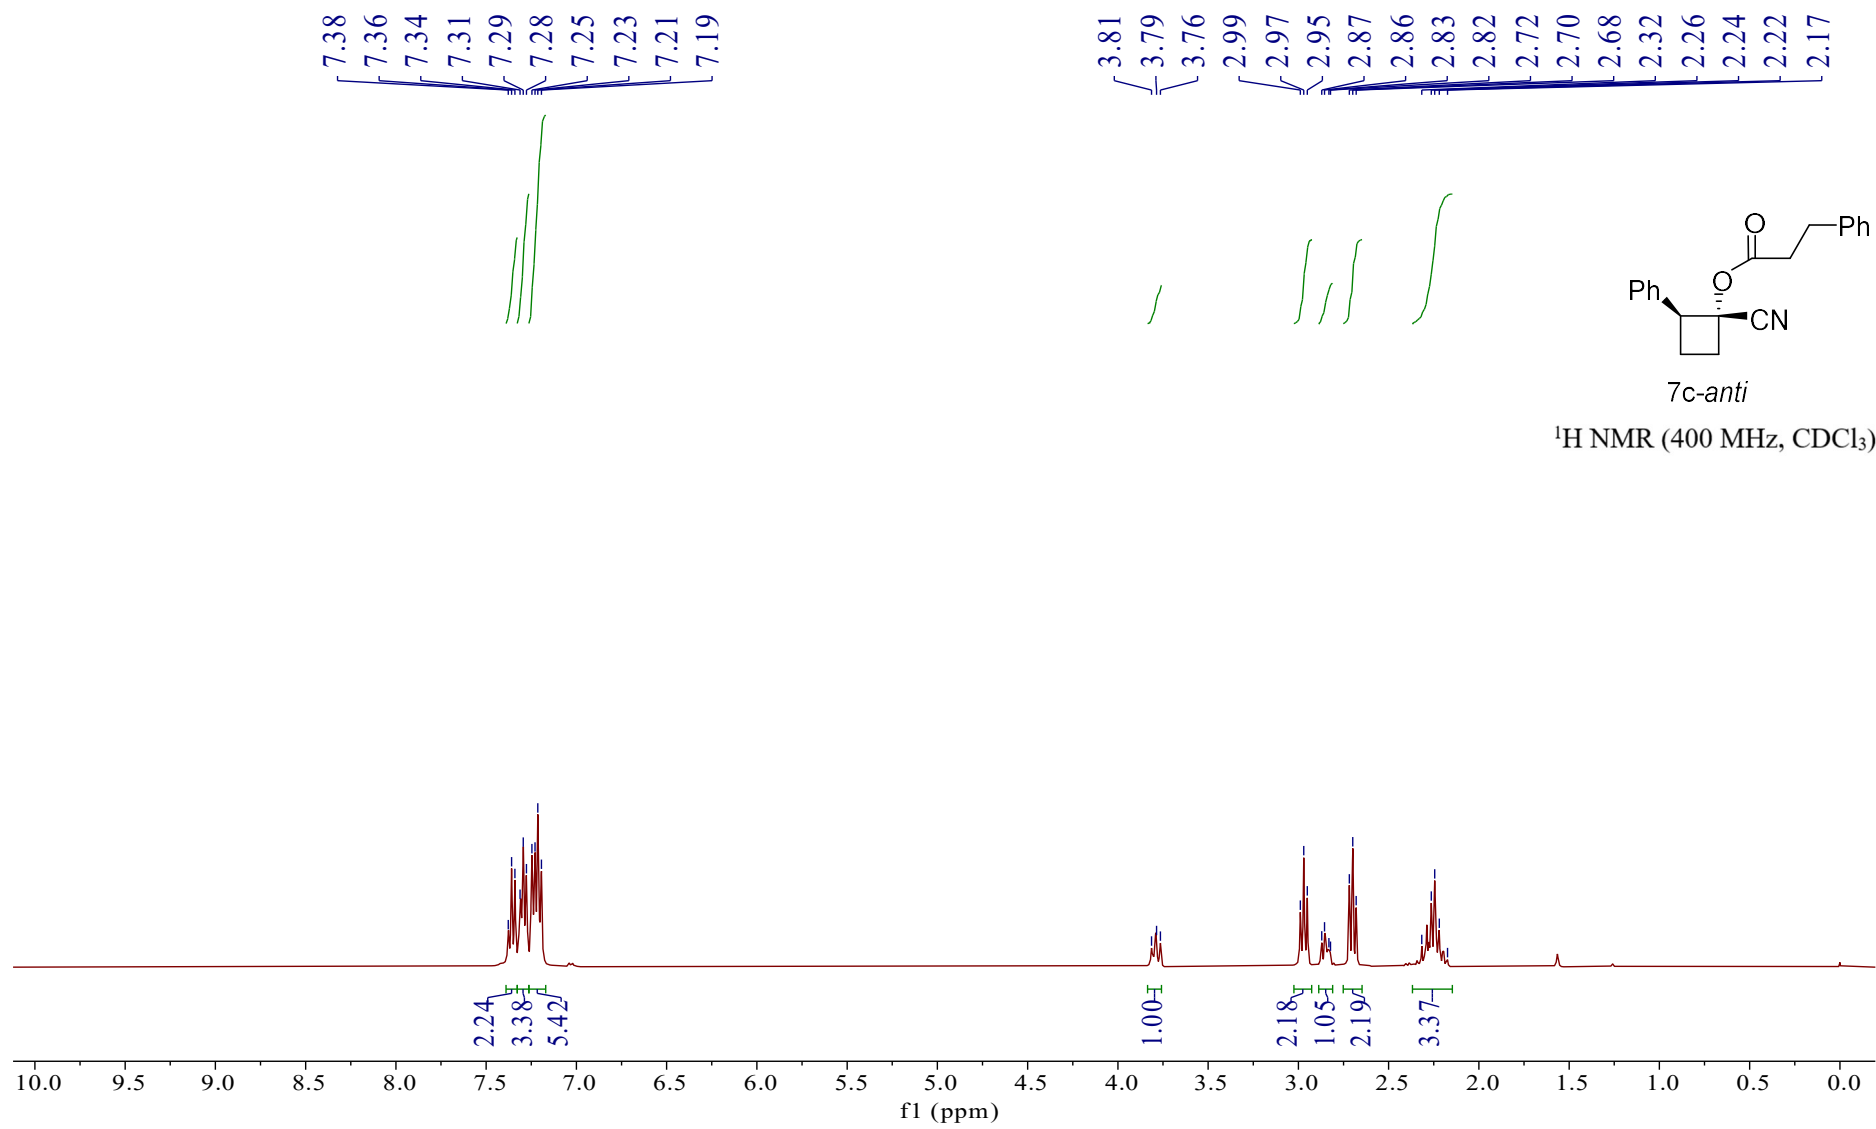

NMR-88

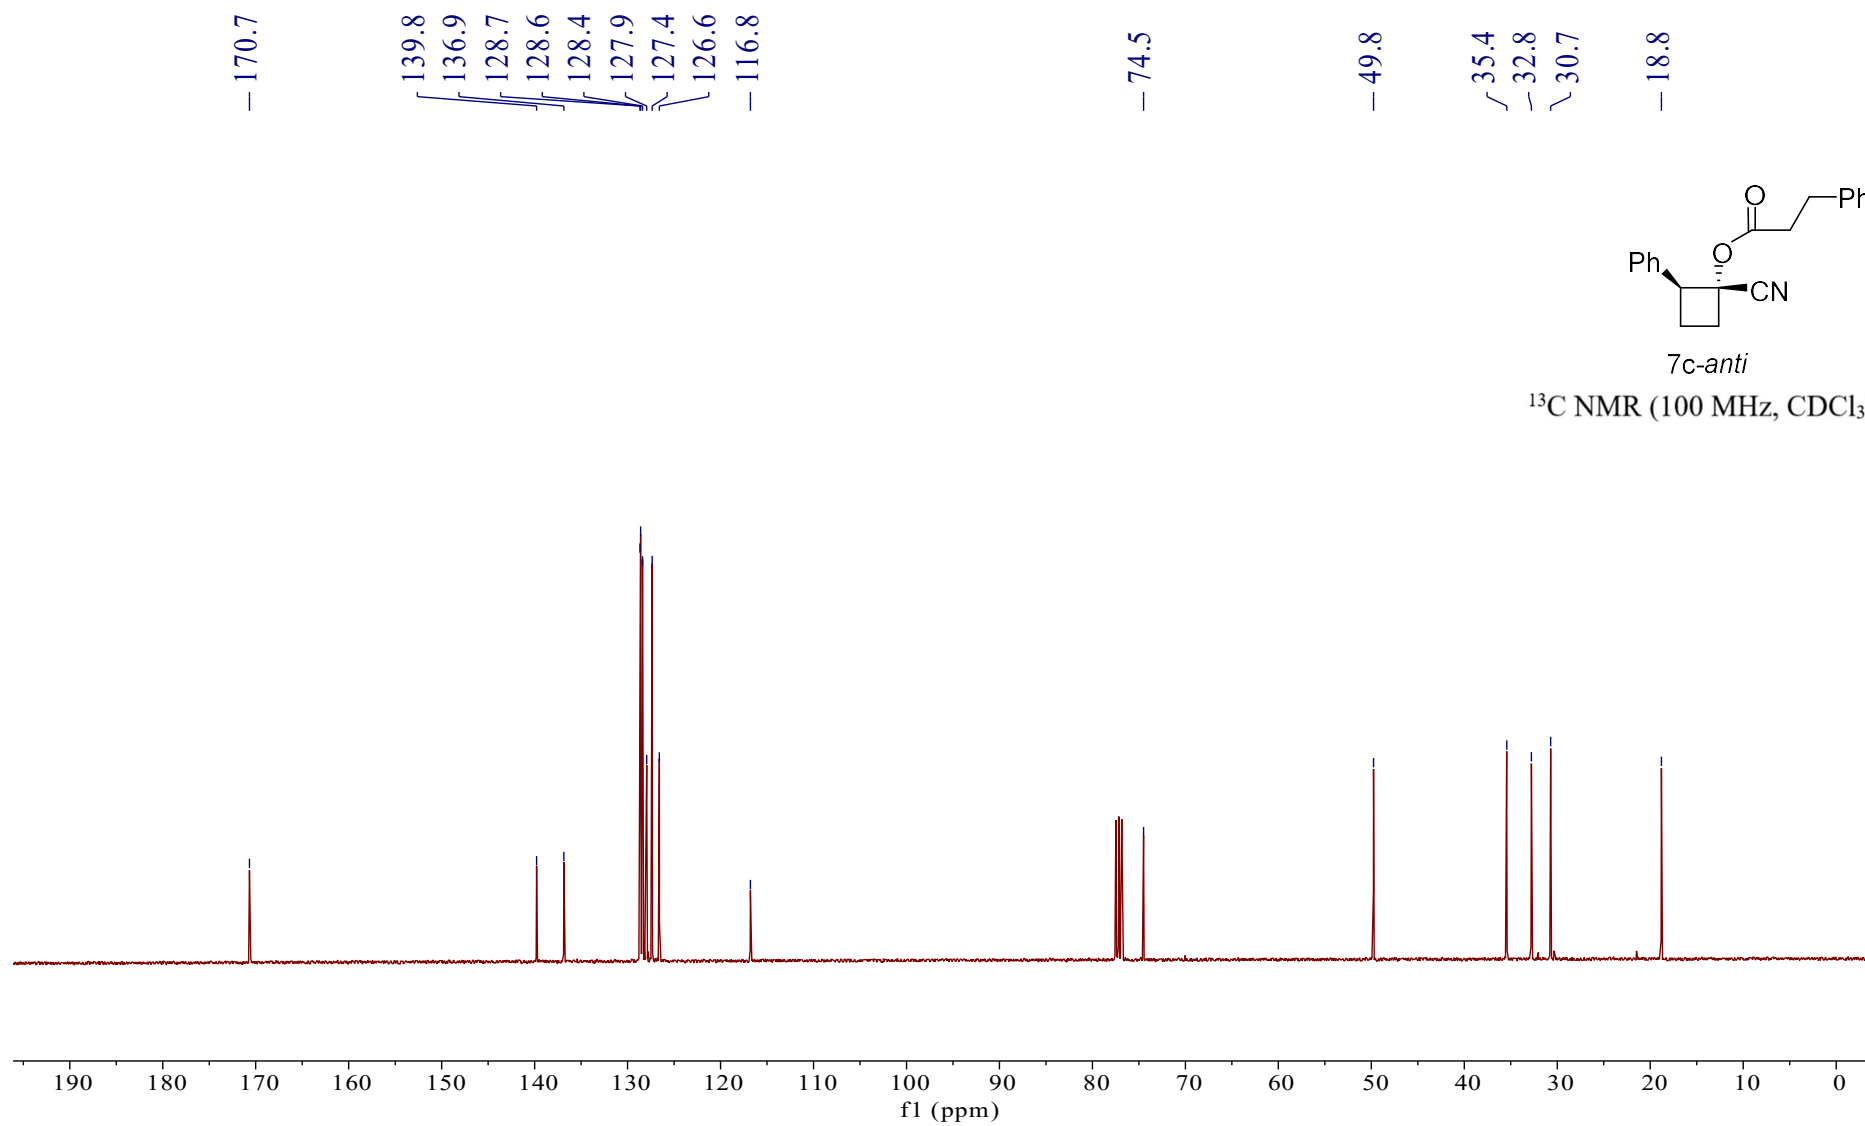

NMR-89

8.34  
8.32  
8.24  
8.22  
7.56  
7.54  
7.27  
7.24

4.07  
4.04  
4.02  
3.08  
3.07  
3.06  
3.03  
2.59  
2.56  
2.54  
2.51  
2.46  
2.45  
2.44  
2.43  
2.42  
2.41  
2.40  
2.38

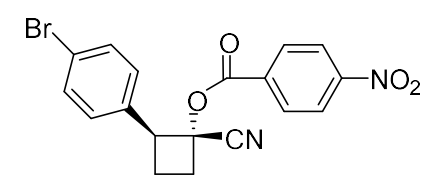

7d-anti

<sup>1</sup>H NMR (400 MHz, CDCl<sub>3</sub>)

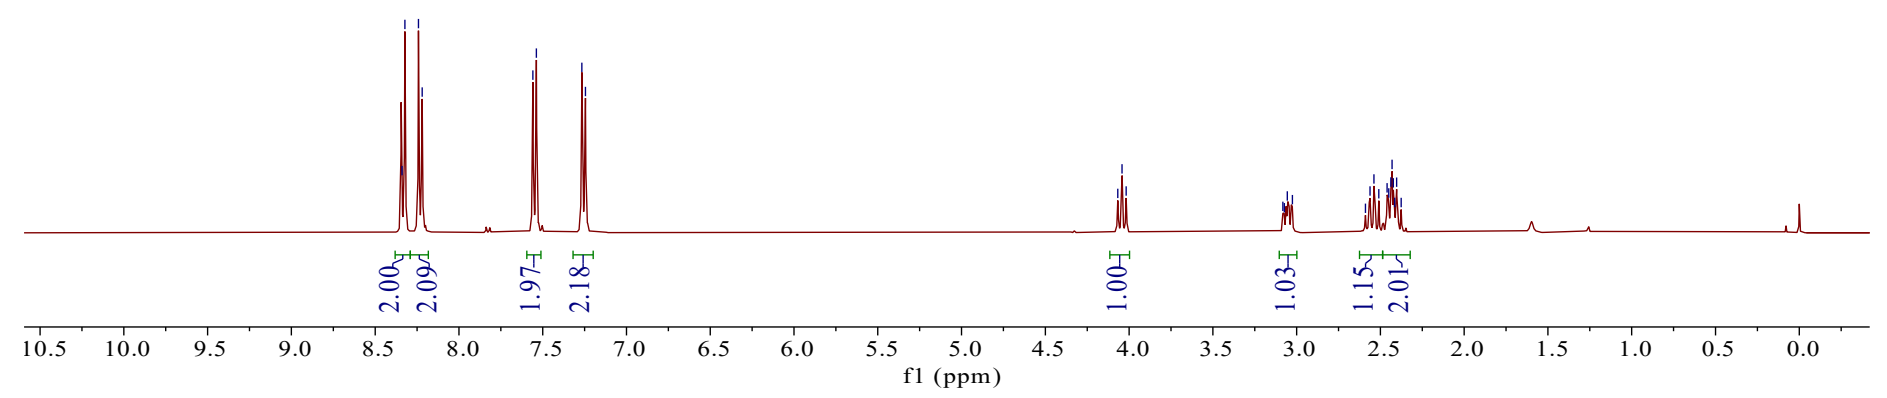

— 162.5  
— 151.2  
— 135.6  
— 133.7  
— 132.0  
— 131.2  
— 129.2  
— 123.9  
— 122.4  
— 116.3

— 75.4

— 49.7

— 32.8

— 19.0

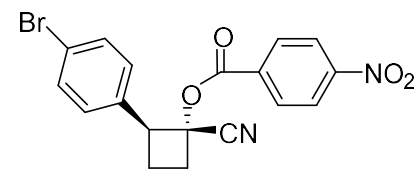

7d-anti

<sup>13</sup>C NMR (100 MHz, CDCl<sub>3</sub>)

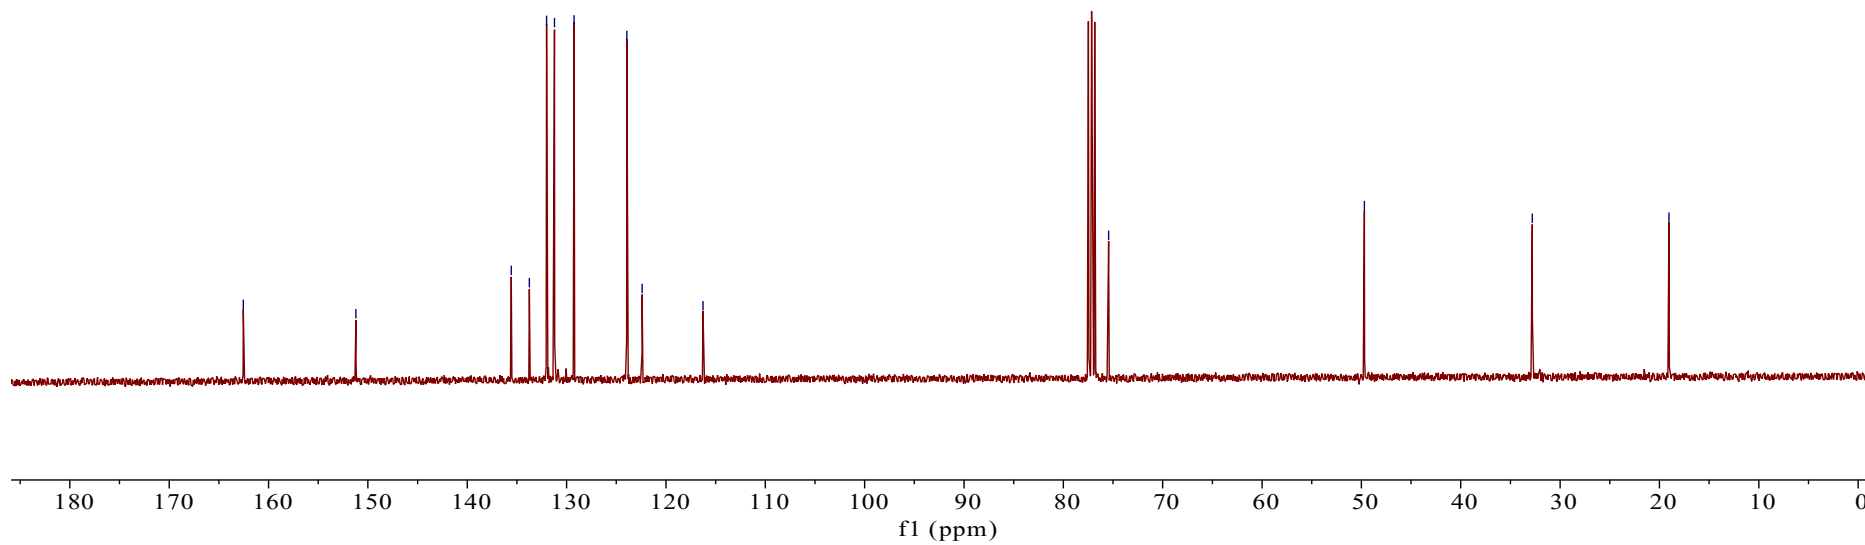

NMR-91

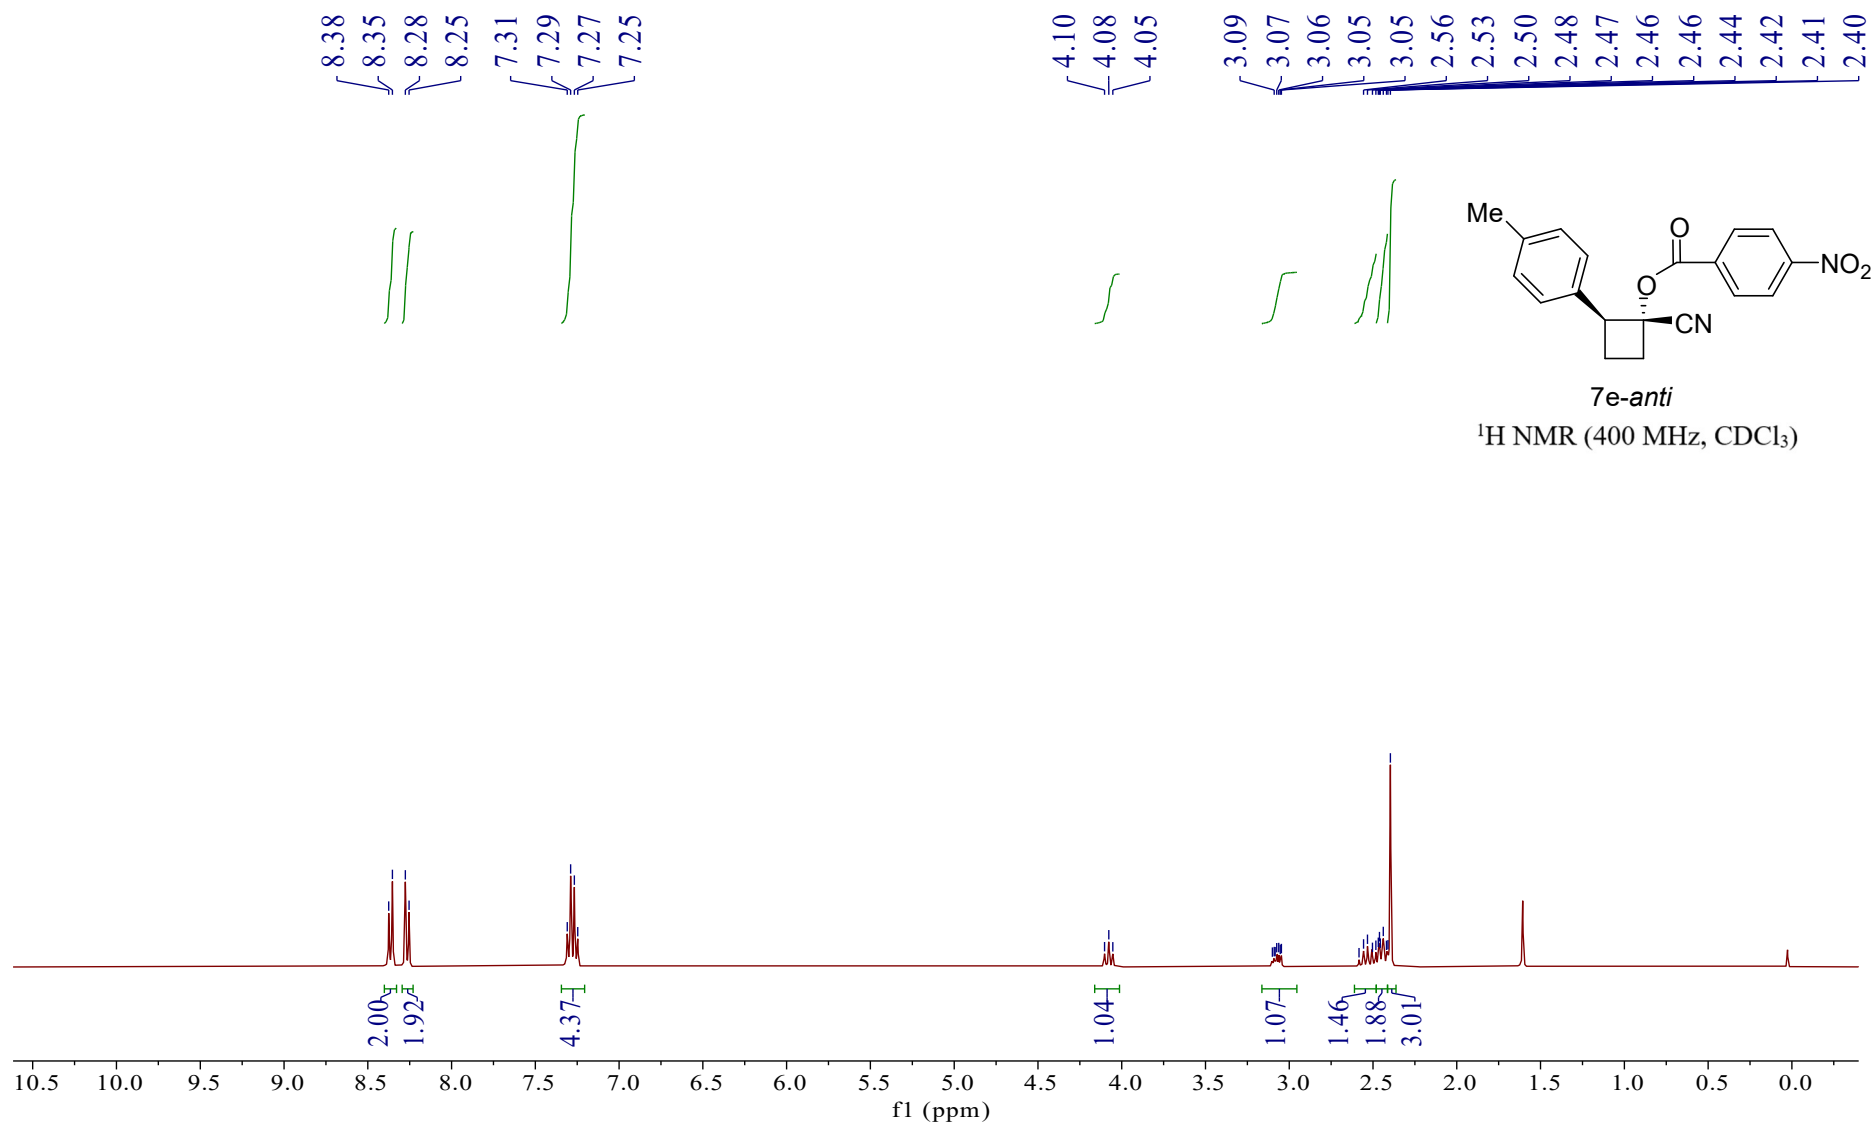



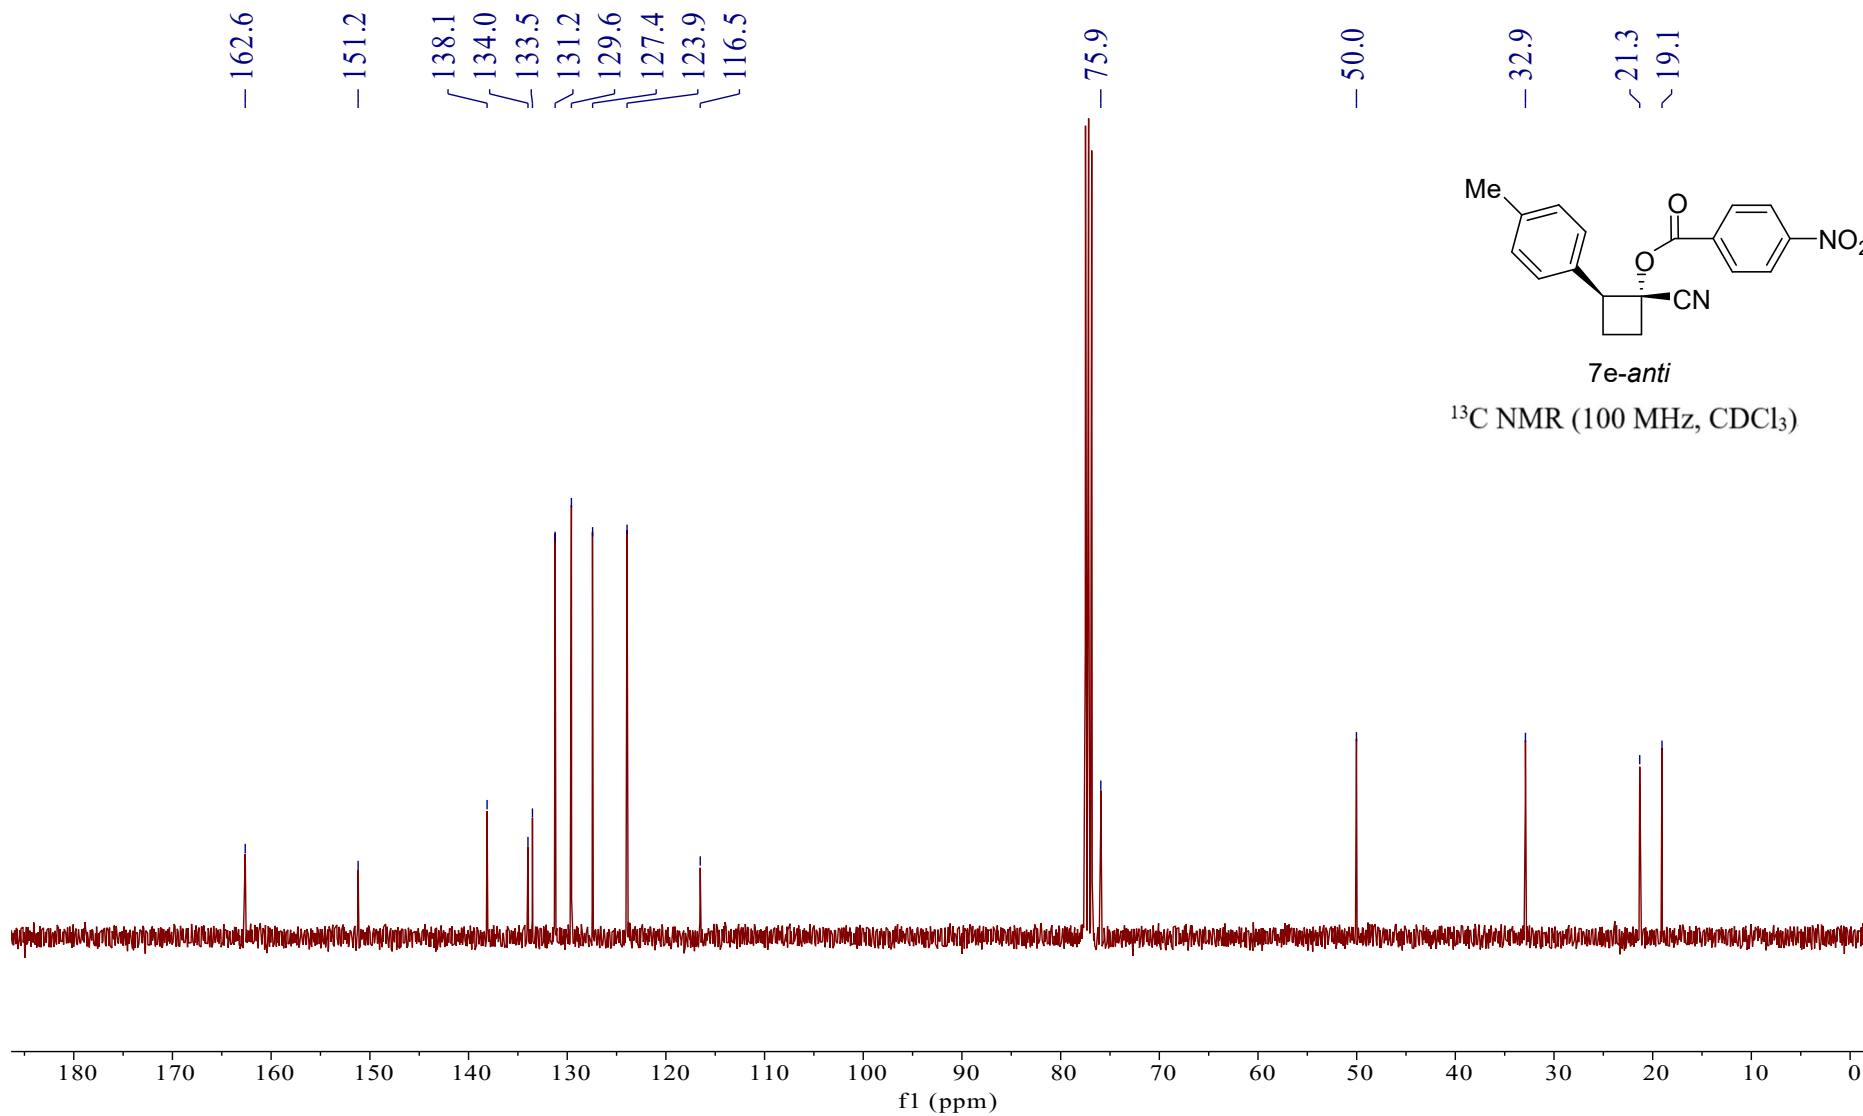

NMR-93

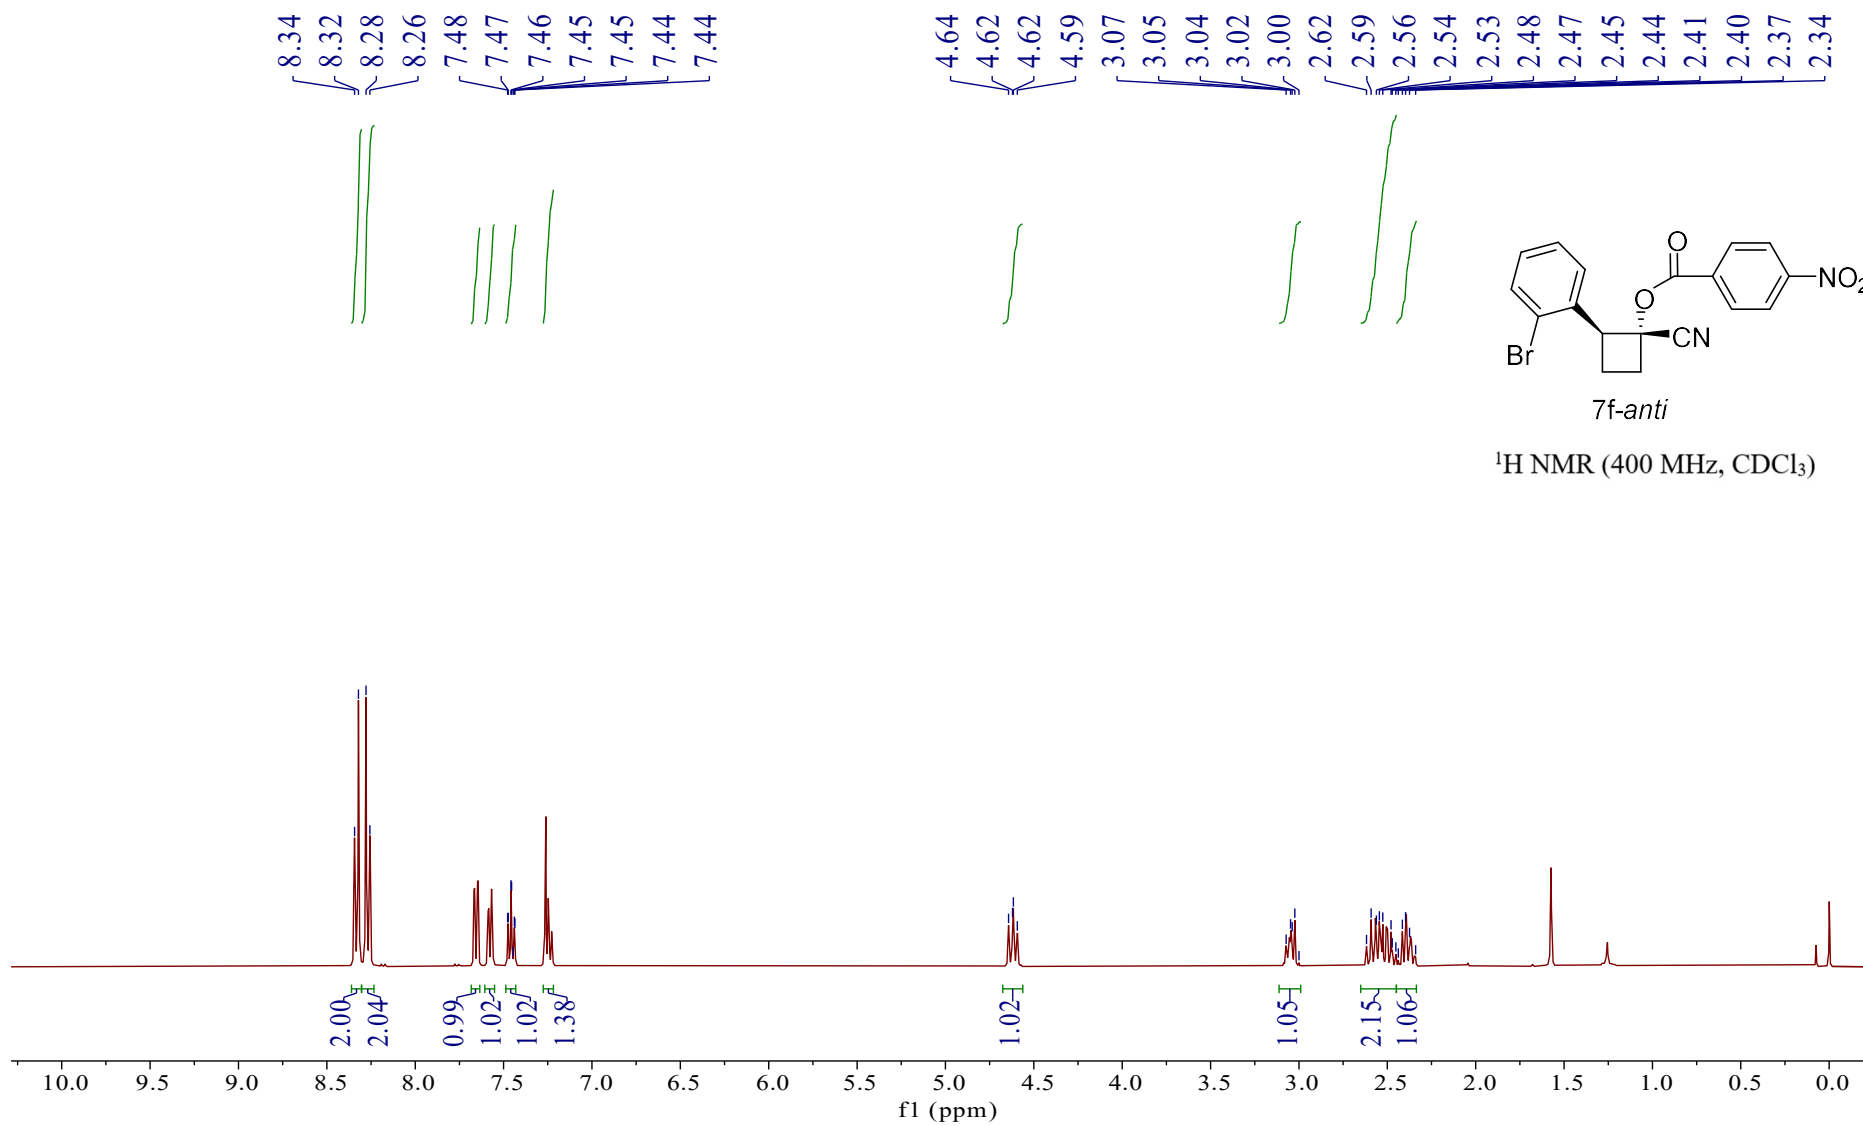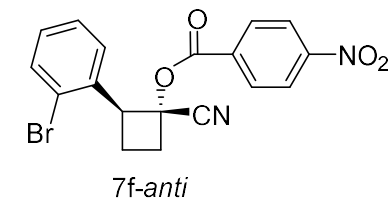

<sup>1</sup>H NMR (400 MHz, CDCl<sub>3</sub>)

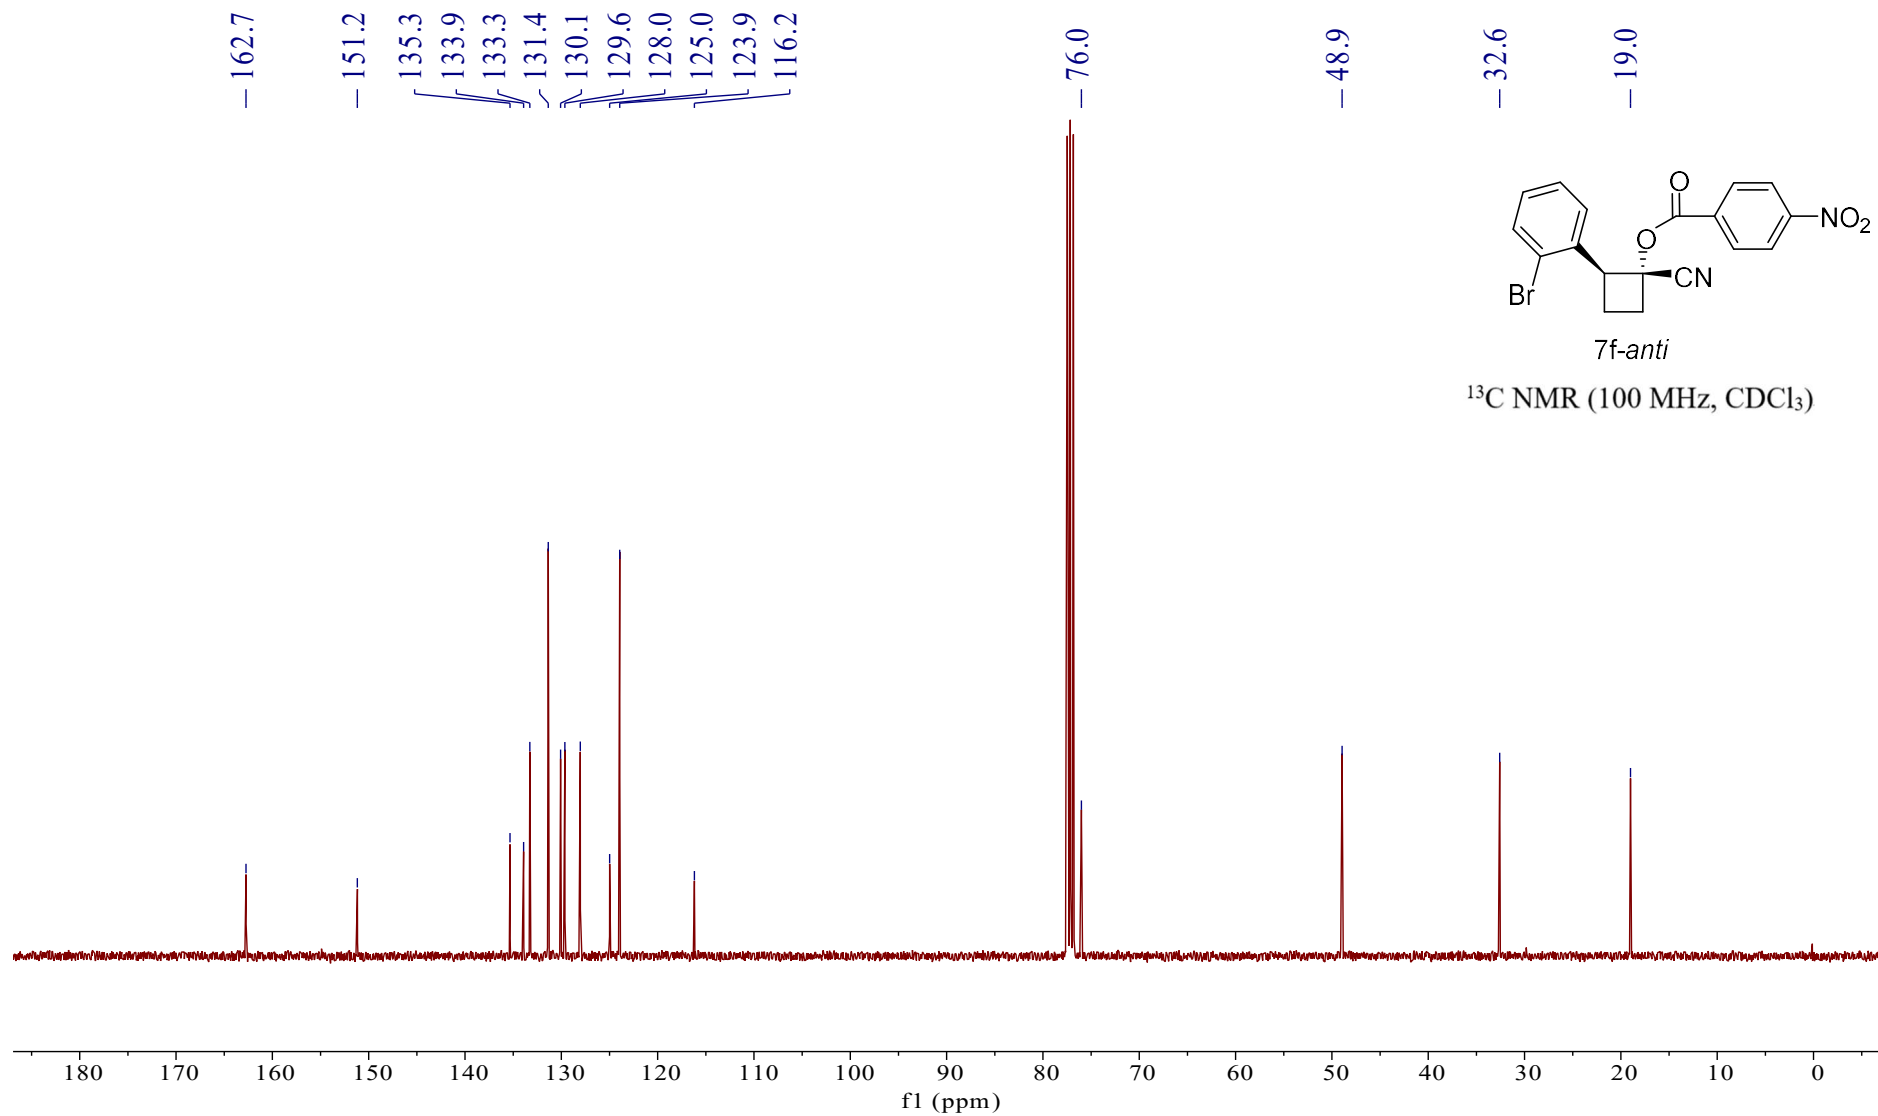

NMR-95

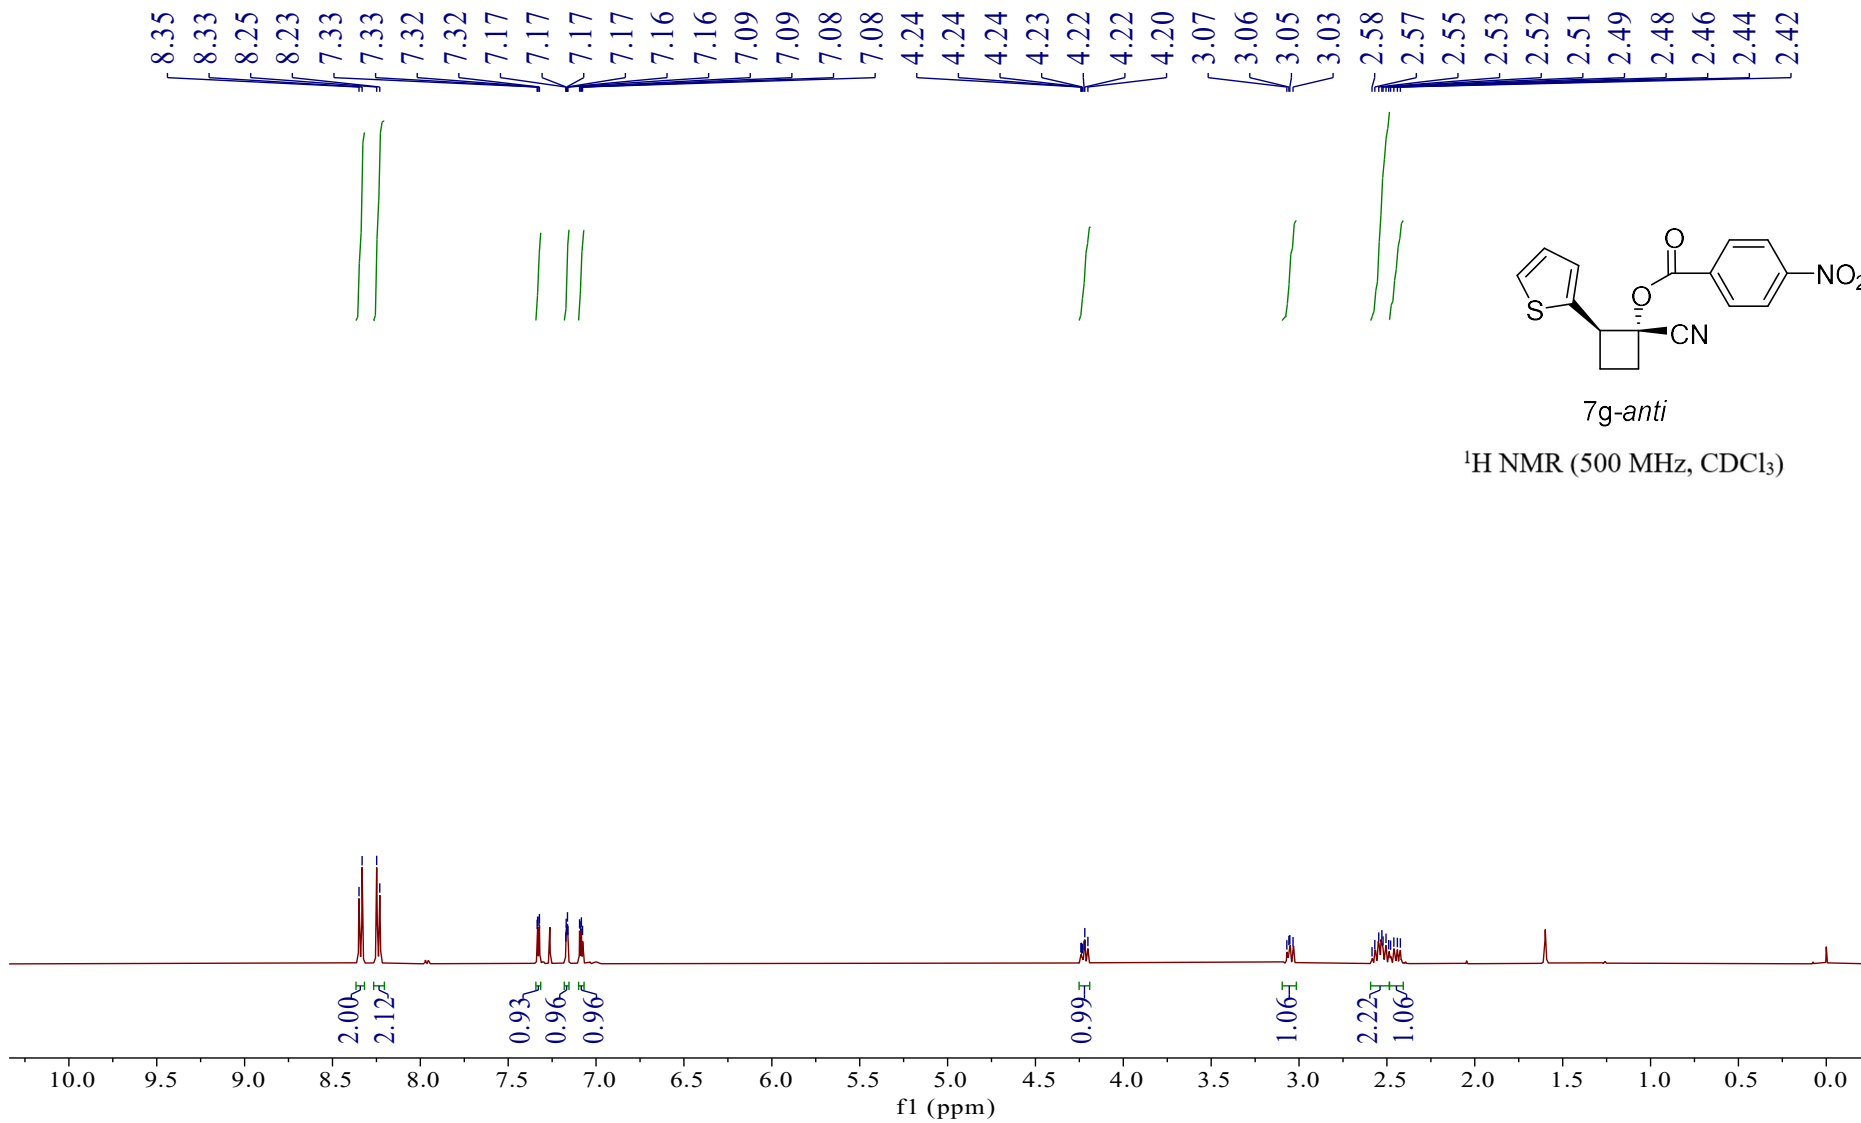

NMR-96

— 162.6  
— 151.2  
— 139.1  
— 133.8  
— 131.3  
— 127.5  
— 126.3  
— 125.7  
— 123.9  
— 116.1

— 76.2

— 45.7

— 32.7

— 21.6

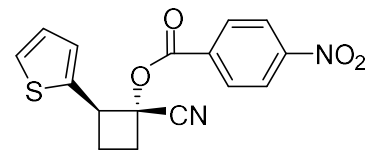

7g-anti

<sup>13</sup>C NMR (125 MHz, CDCl<sub>3</sub>)

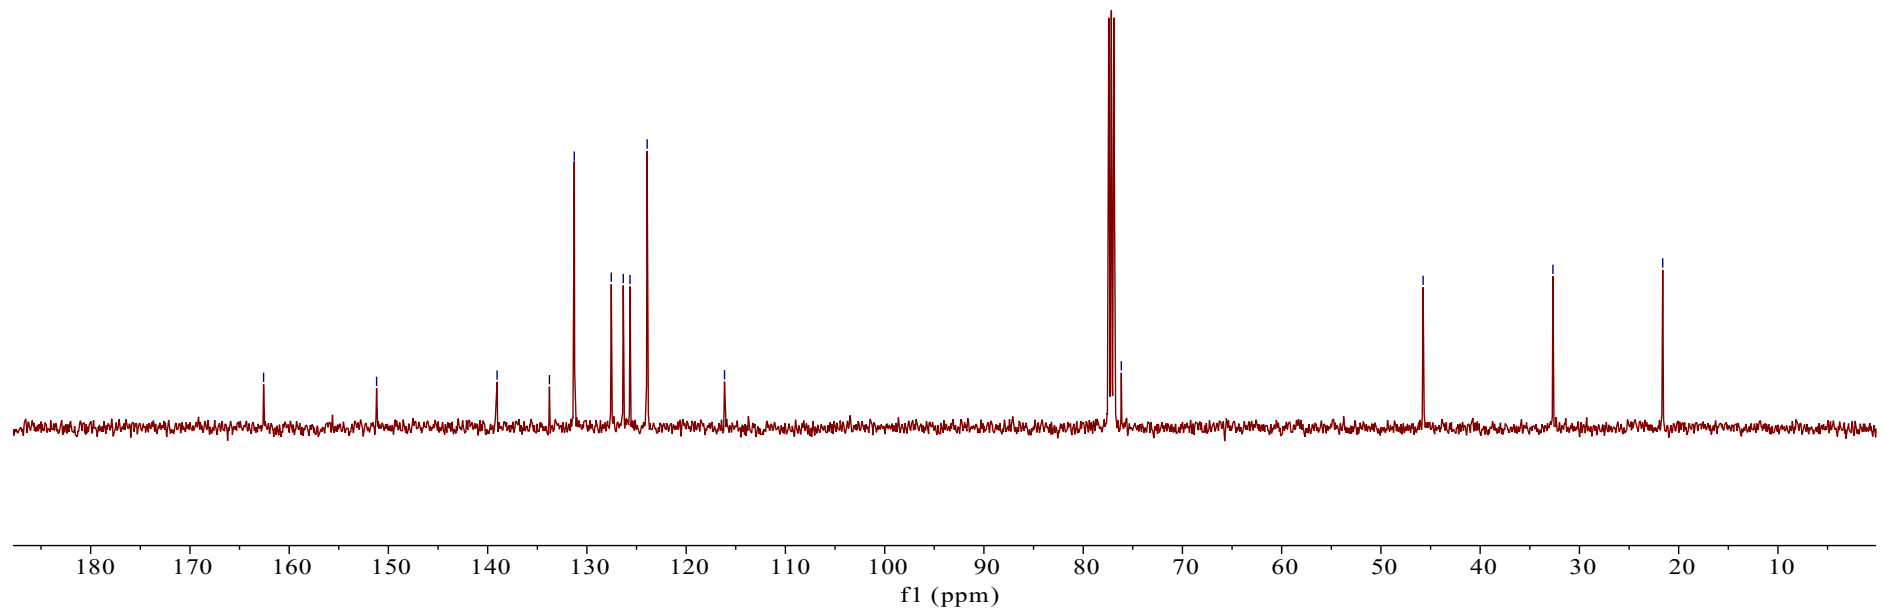

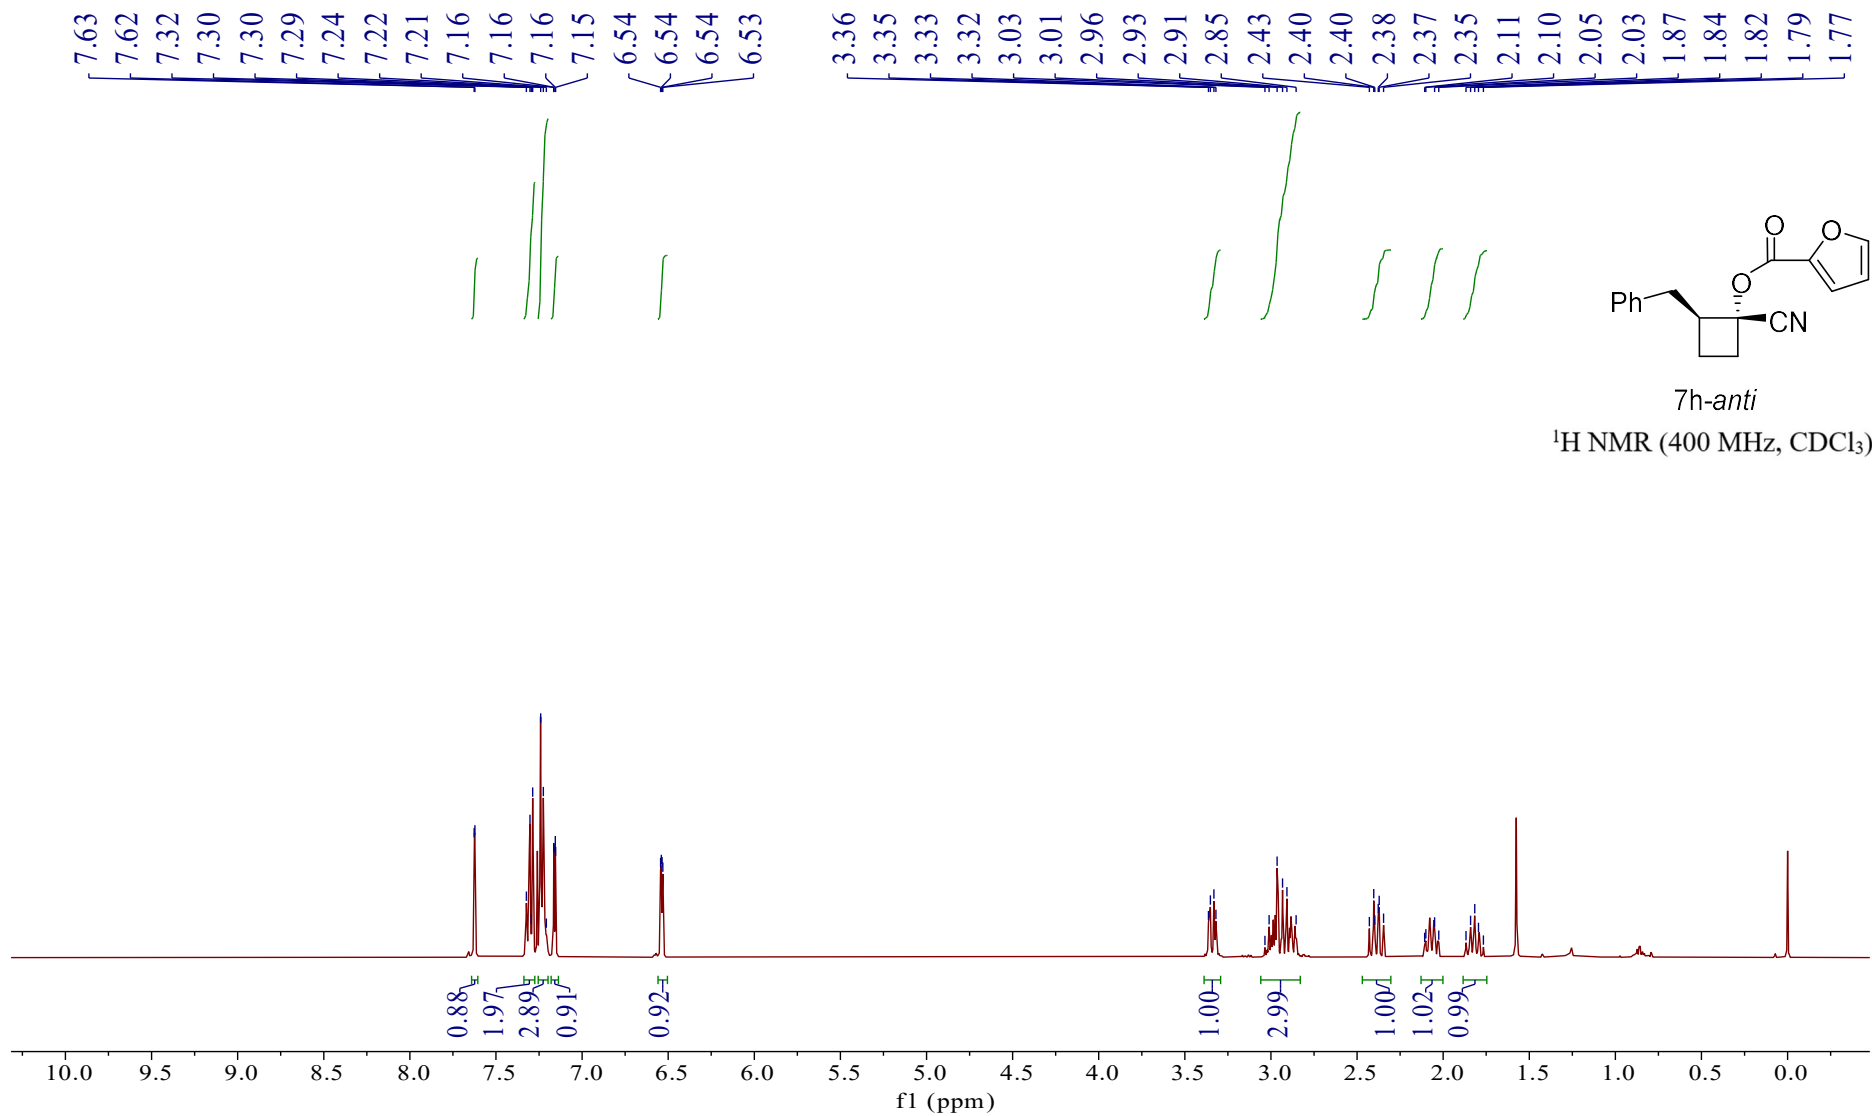

NMR-98

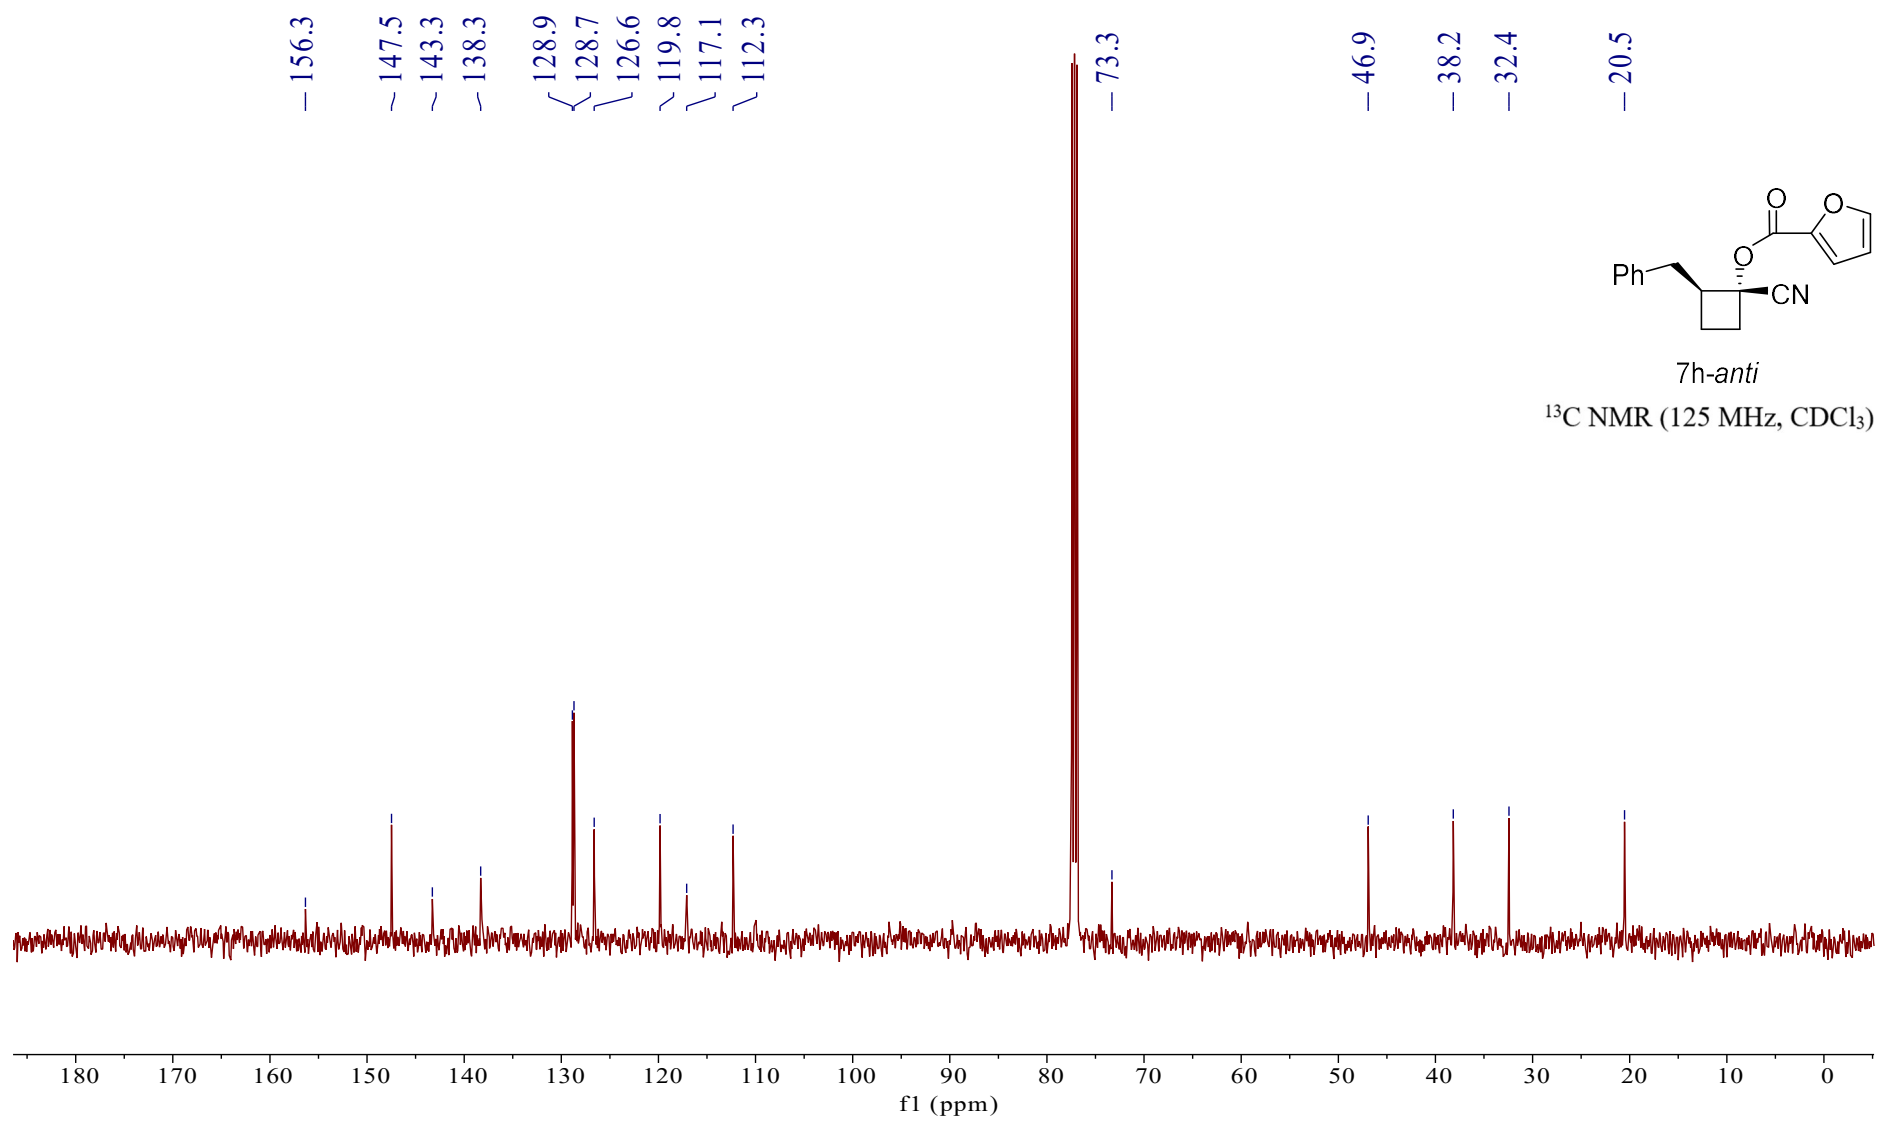

NMR-99

8.35  
8.34  
8.33  
8.27  
8.25  
7.42  
7.40  
7.38  
7.35  
7.35  
7.34  
7.33  
7.31

3.34  
3.32  
3.30  
3.28  
3.24  
3.23  
3.19  
3.17  
3.14  
3.12  
2.84  
2.81  
2.77  
2.76

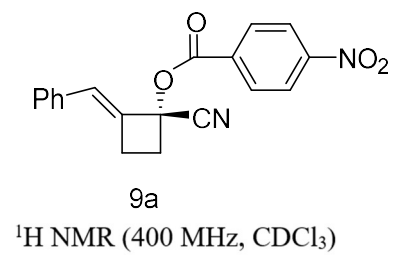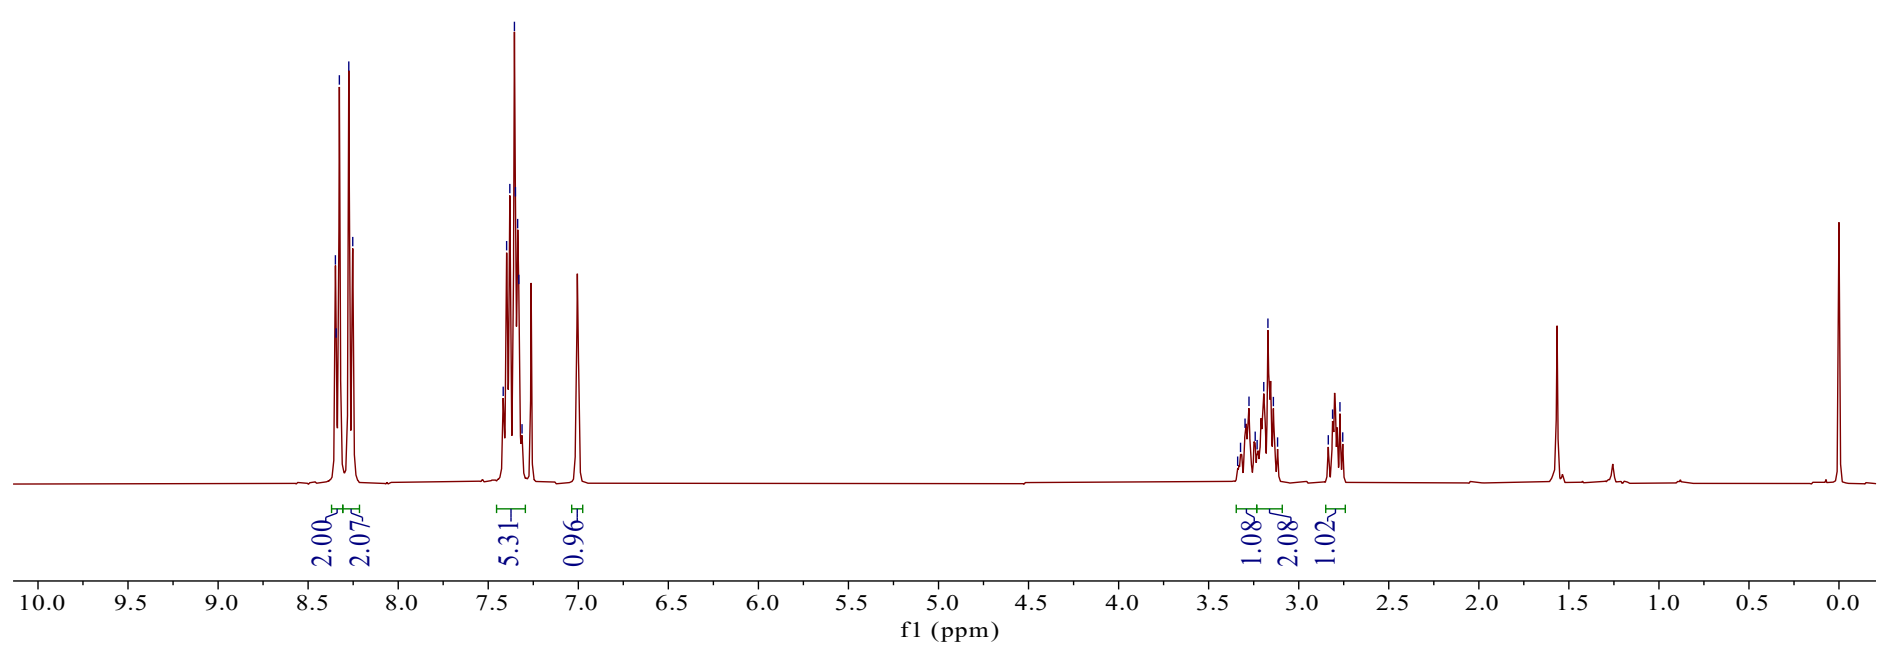



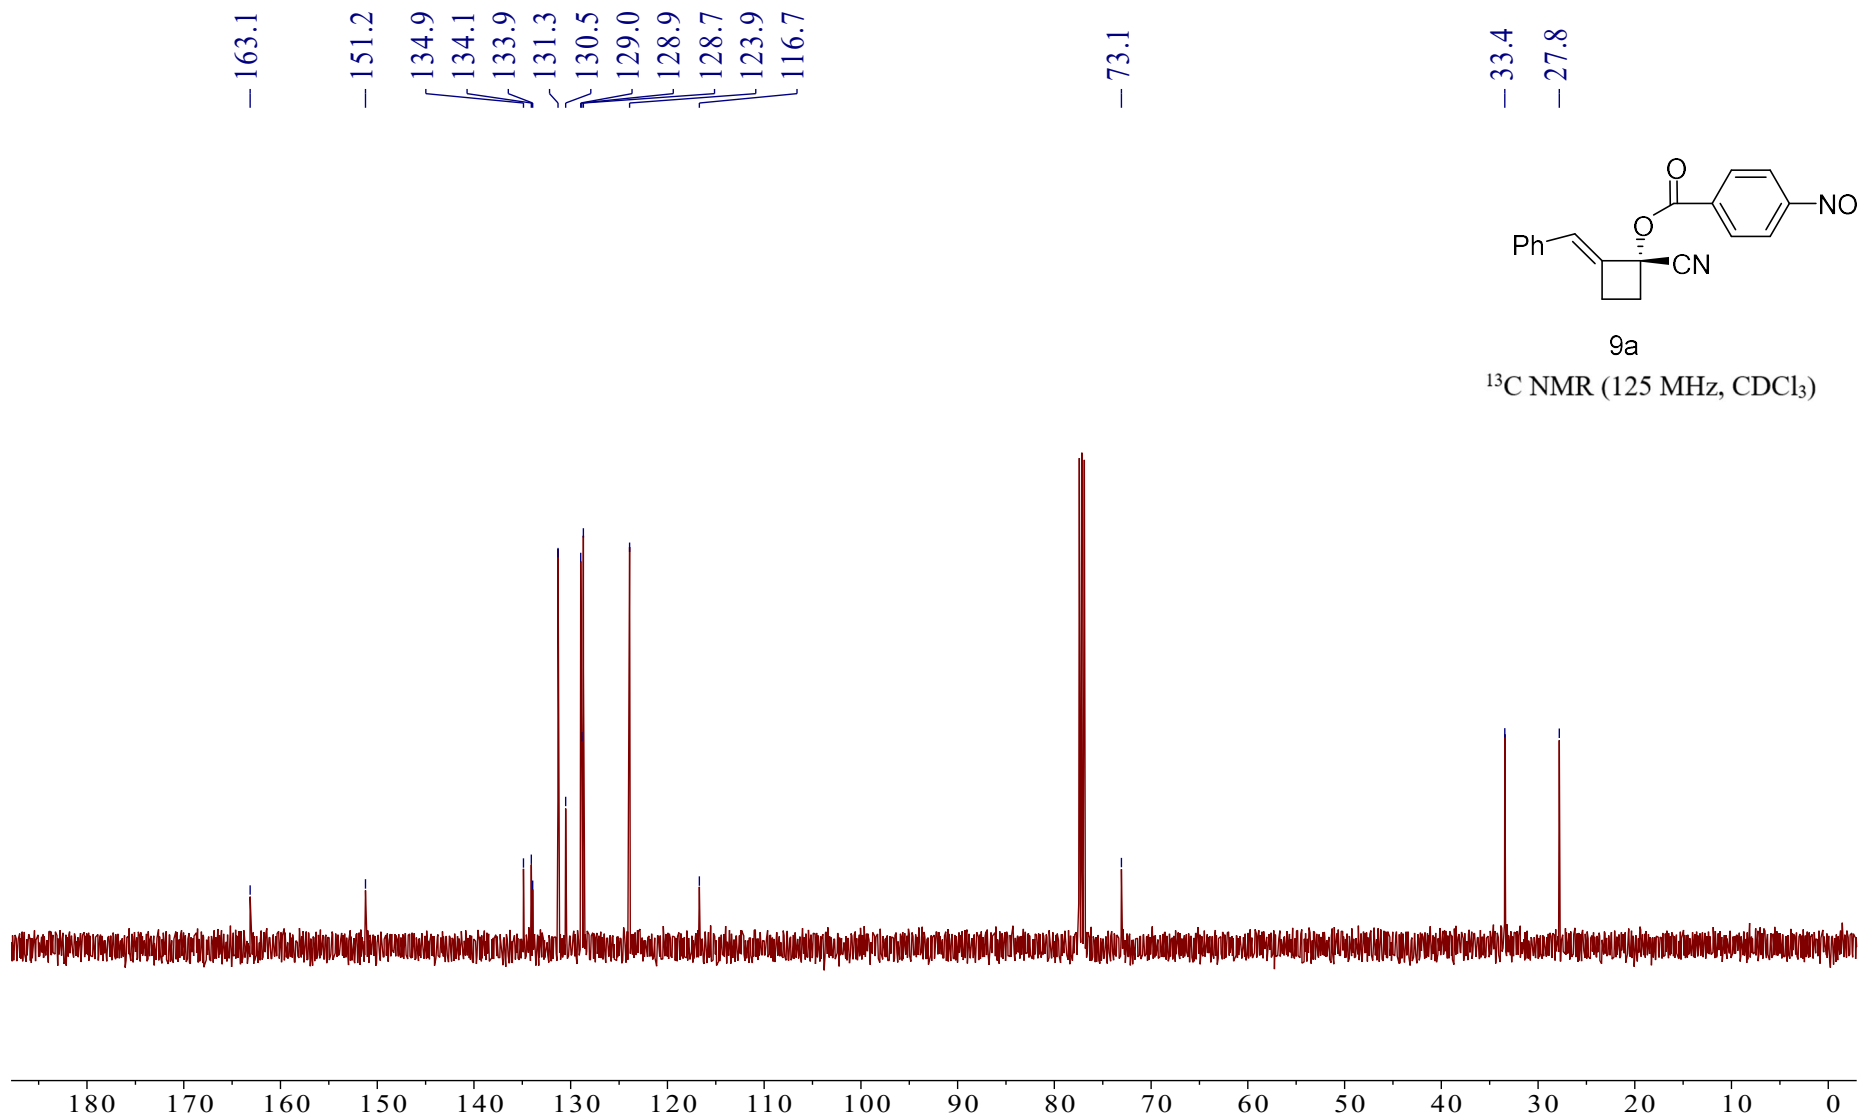

8.04  
8.02  
7.40  
7.38  
7.36  
7.34  
7.32  
7.31  
6.98  
6.97  
6.96  
6.96  
6.94

3.87  
3.26  
3.23  
3.18  
3.12  
3.11  
3.08  
3.07  
2.78  
2.76  
2.75  
2.73  
2.70

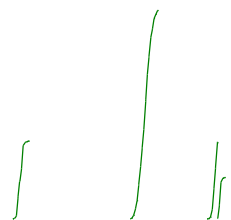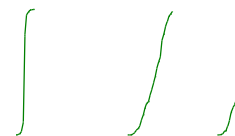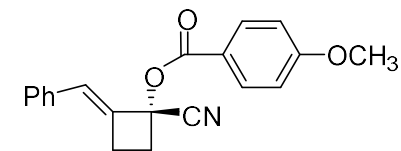

9b

<sup>1</sup>H NMR (400 MHz, CDCl<sub>3</sub>)

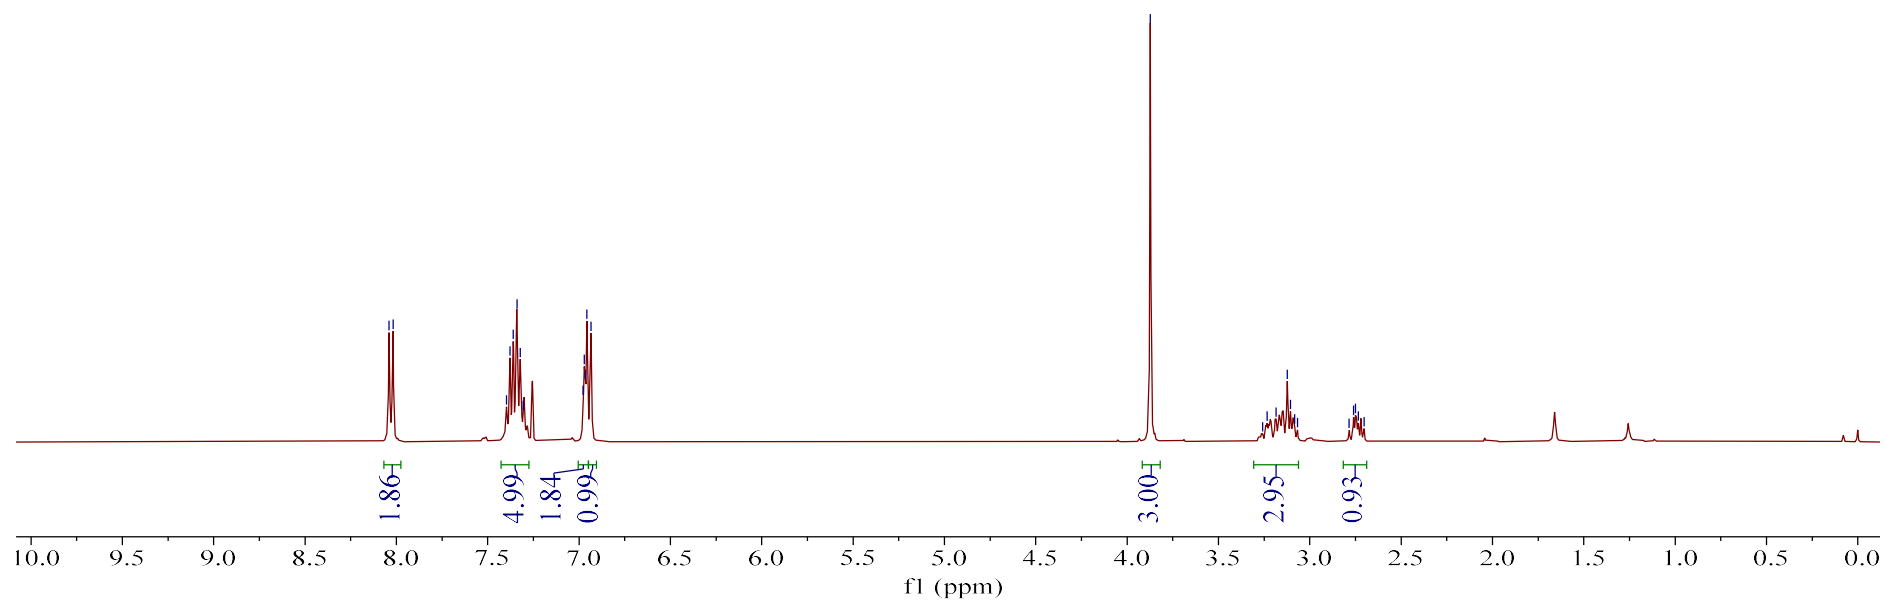

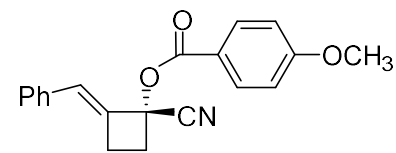

9b

<sup>13</sup>C NMR (100 MHz, CDCl<sub>3</sub>)

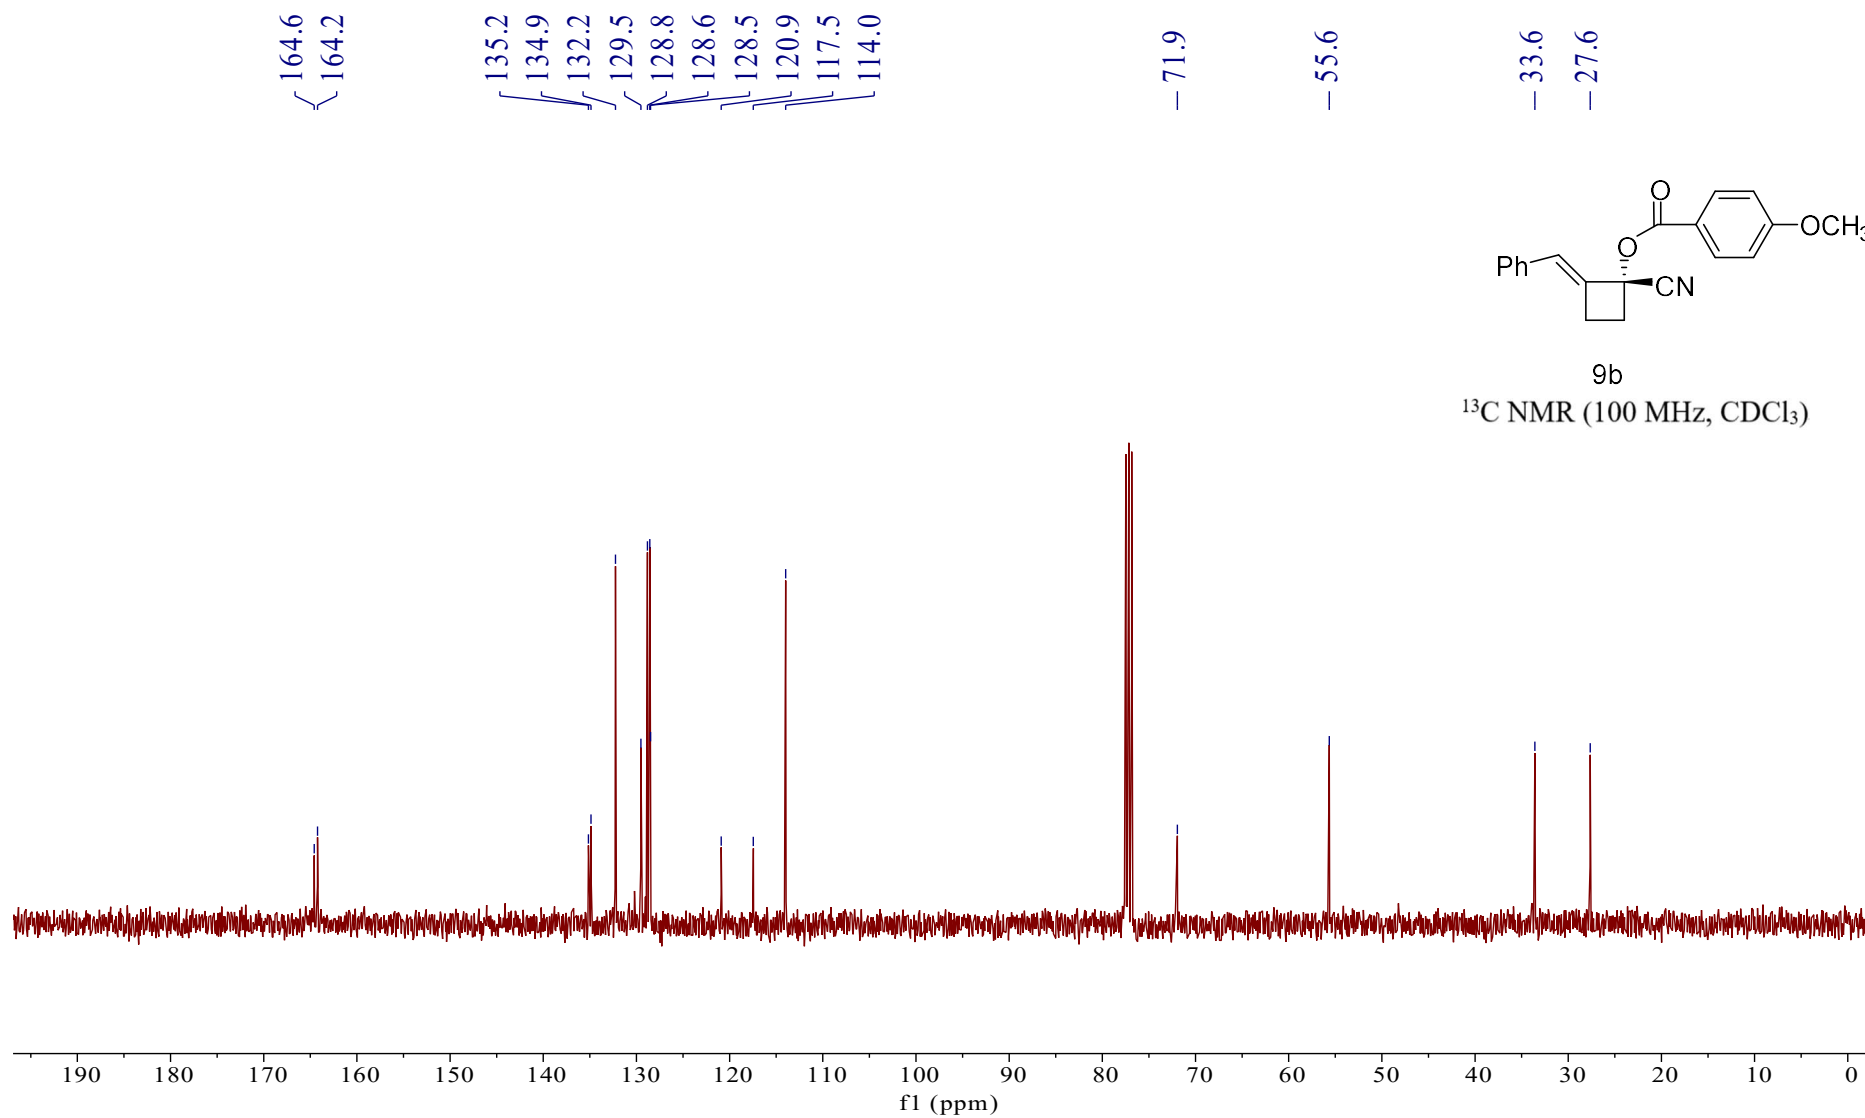

NMR-103

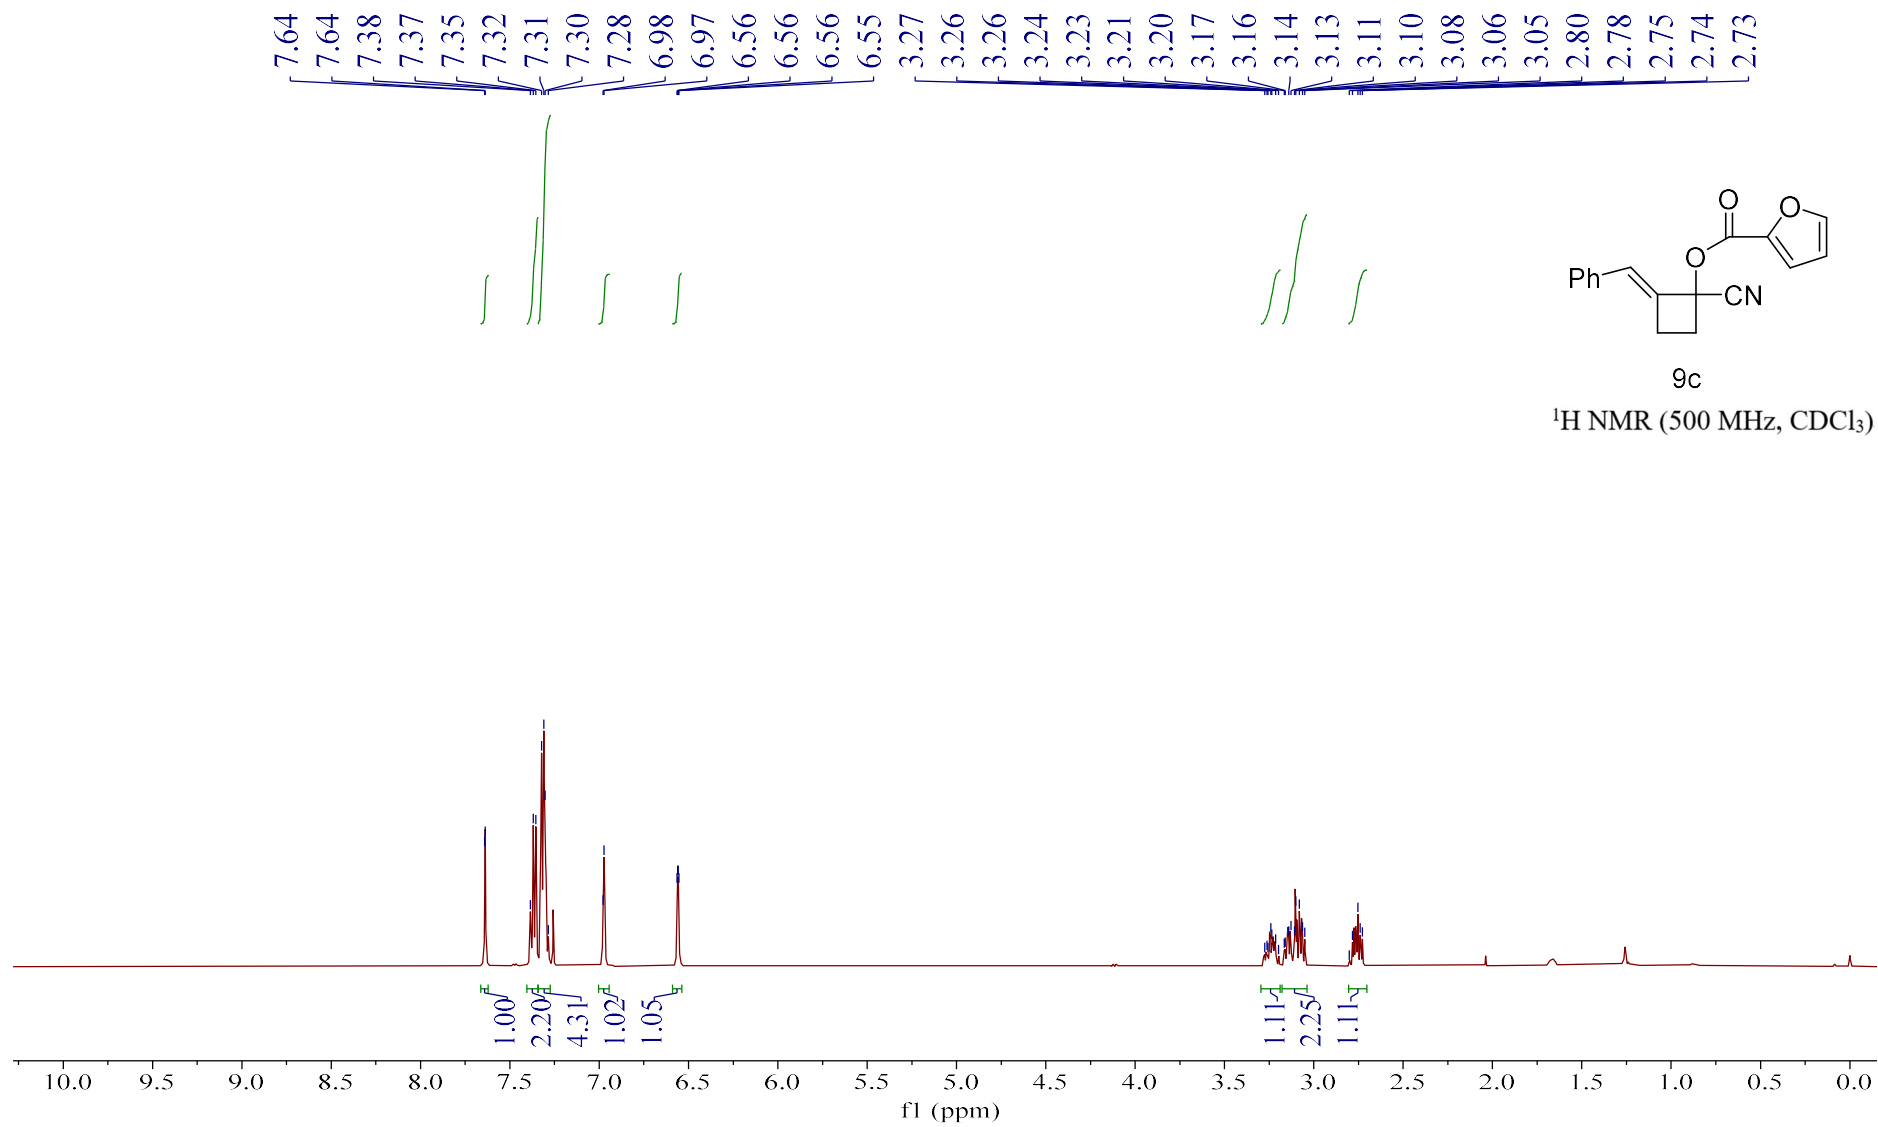

NMR-104

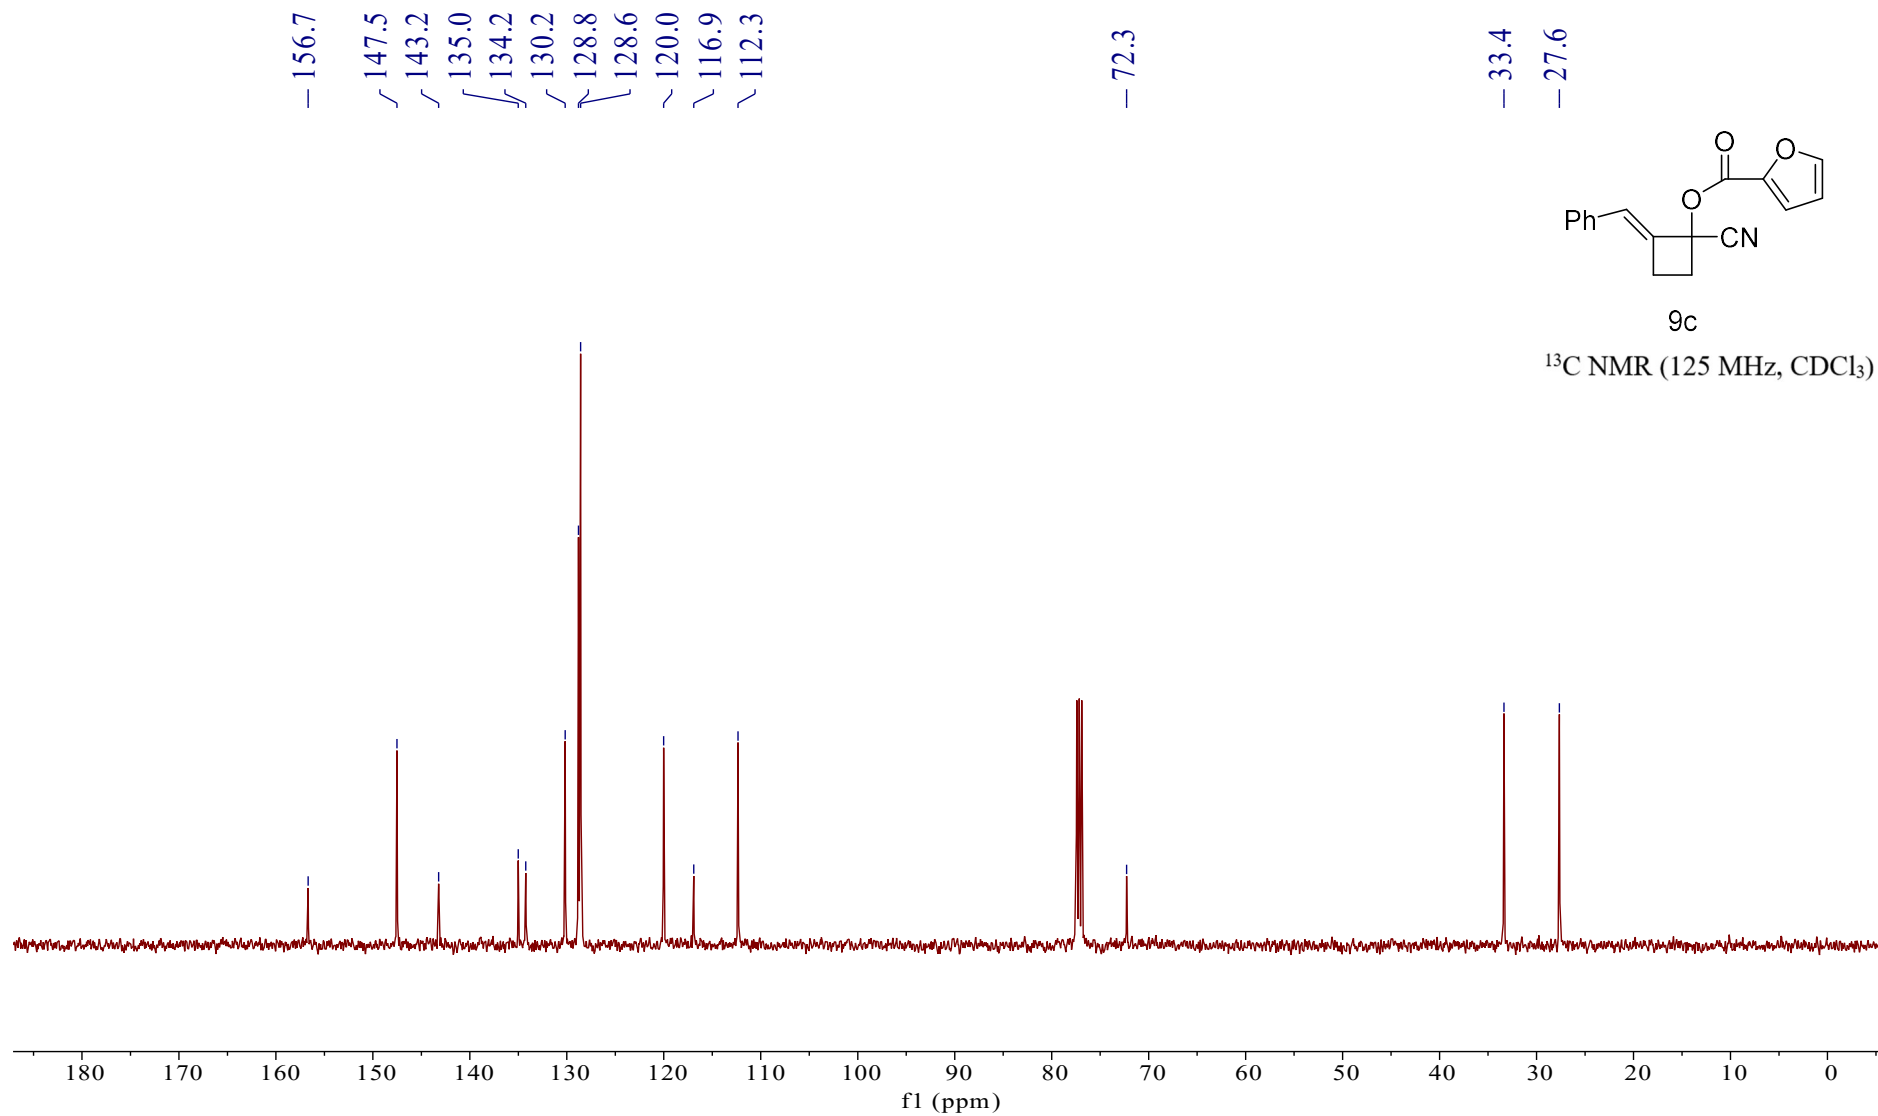

NMR-105

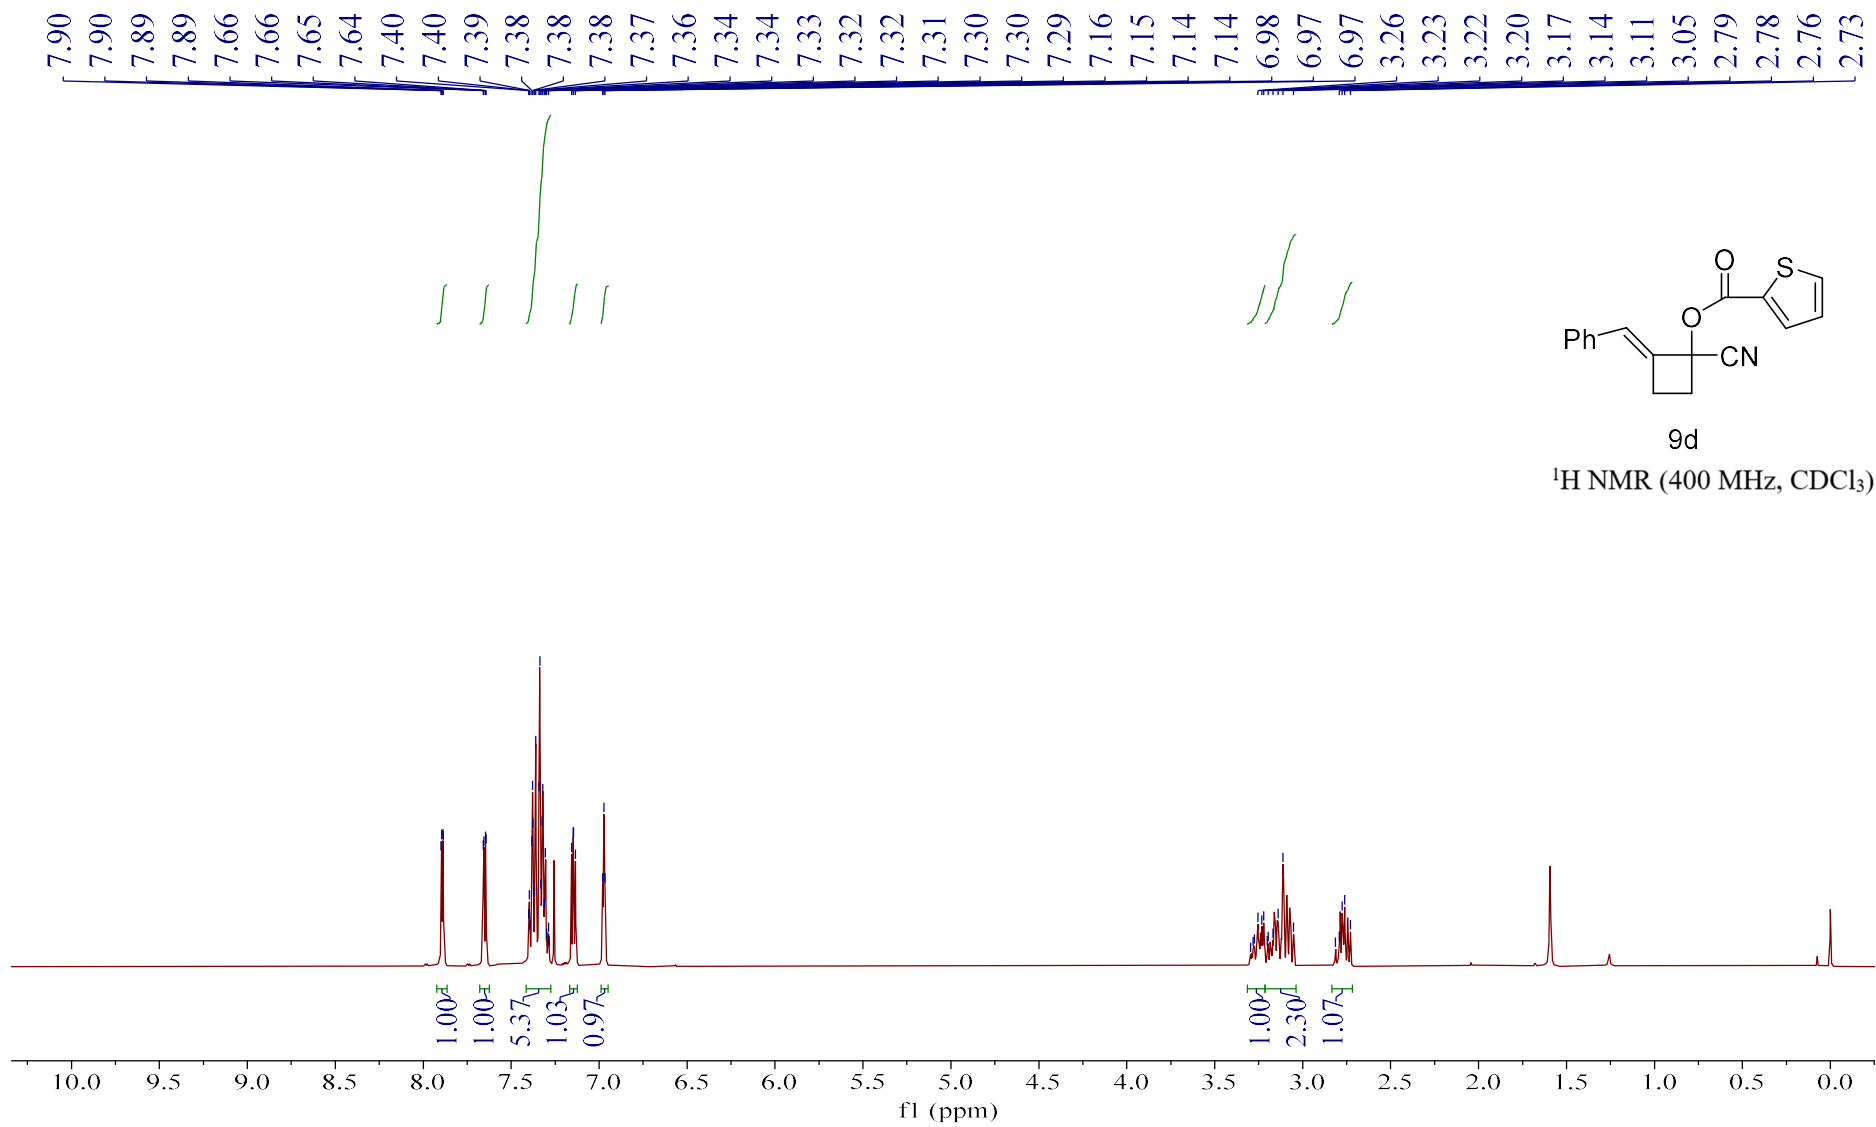

NMR-106

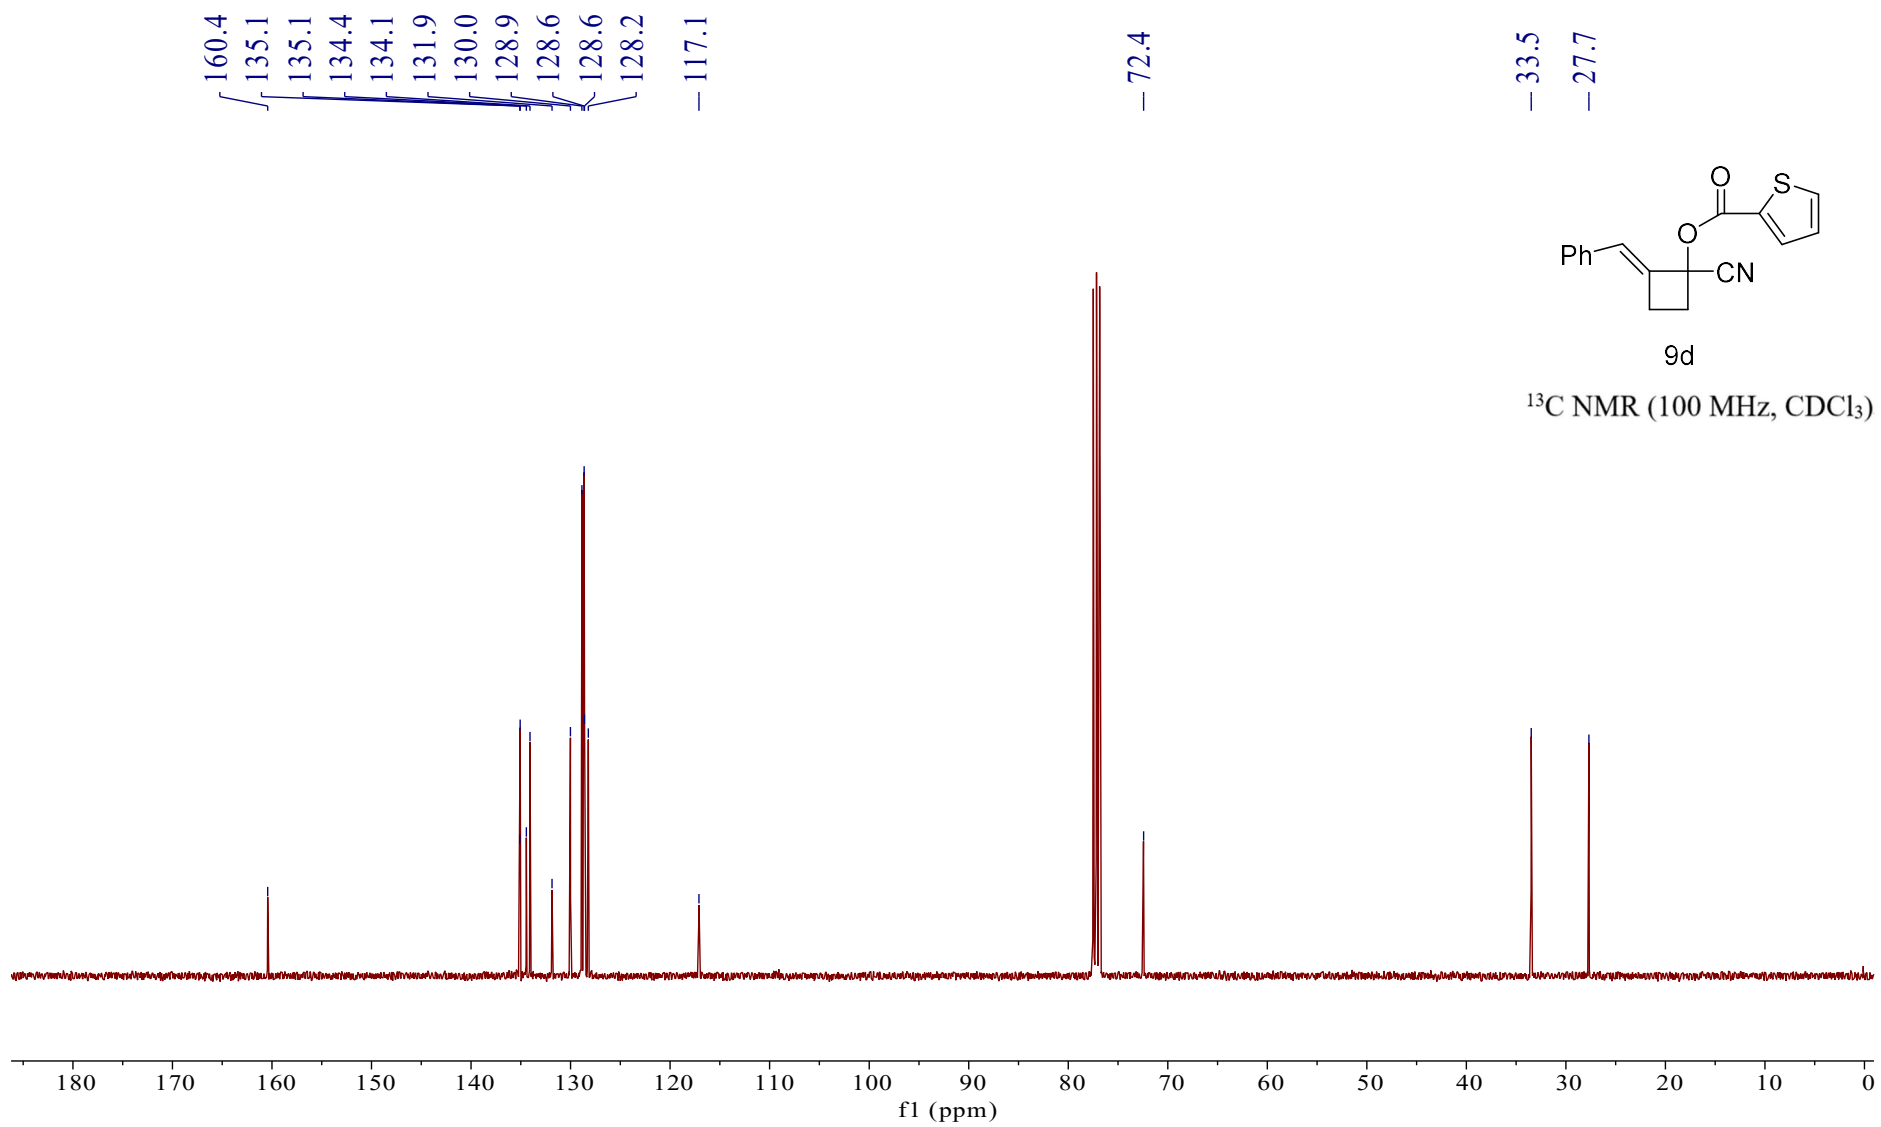

NMR-107

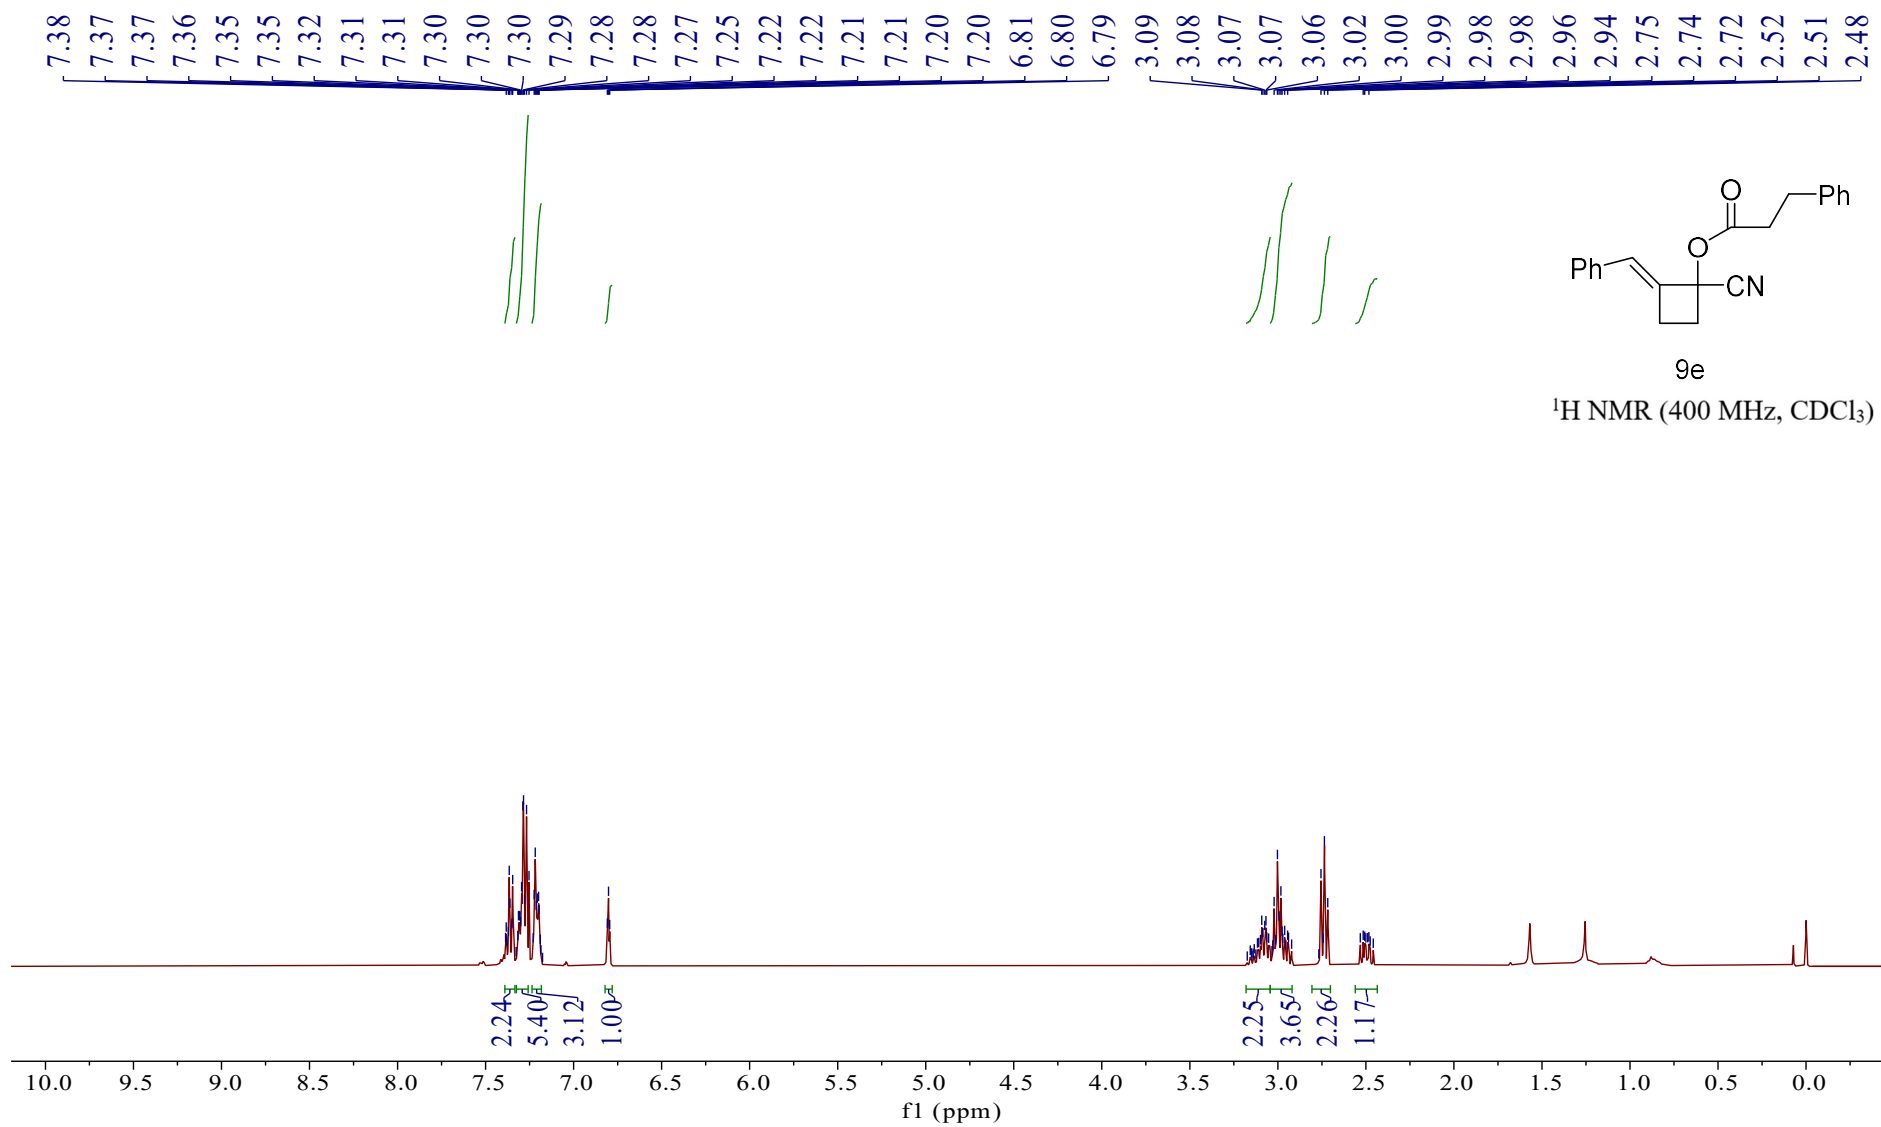

NMR-108



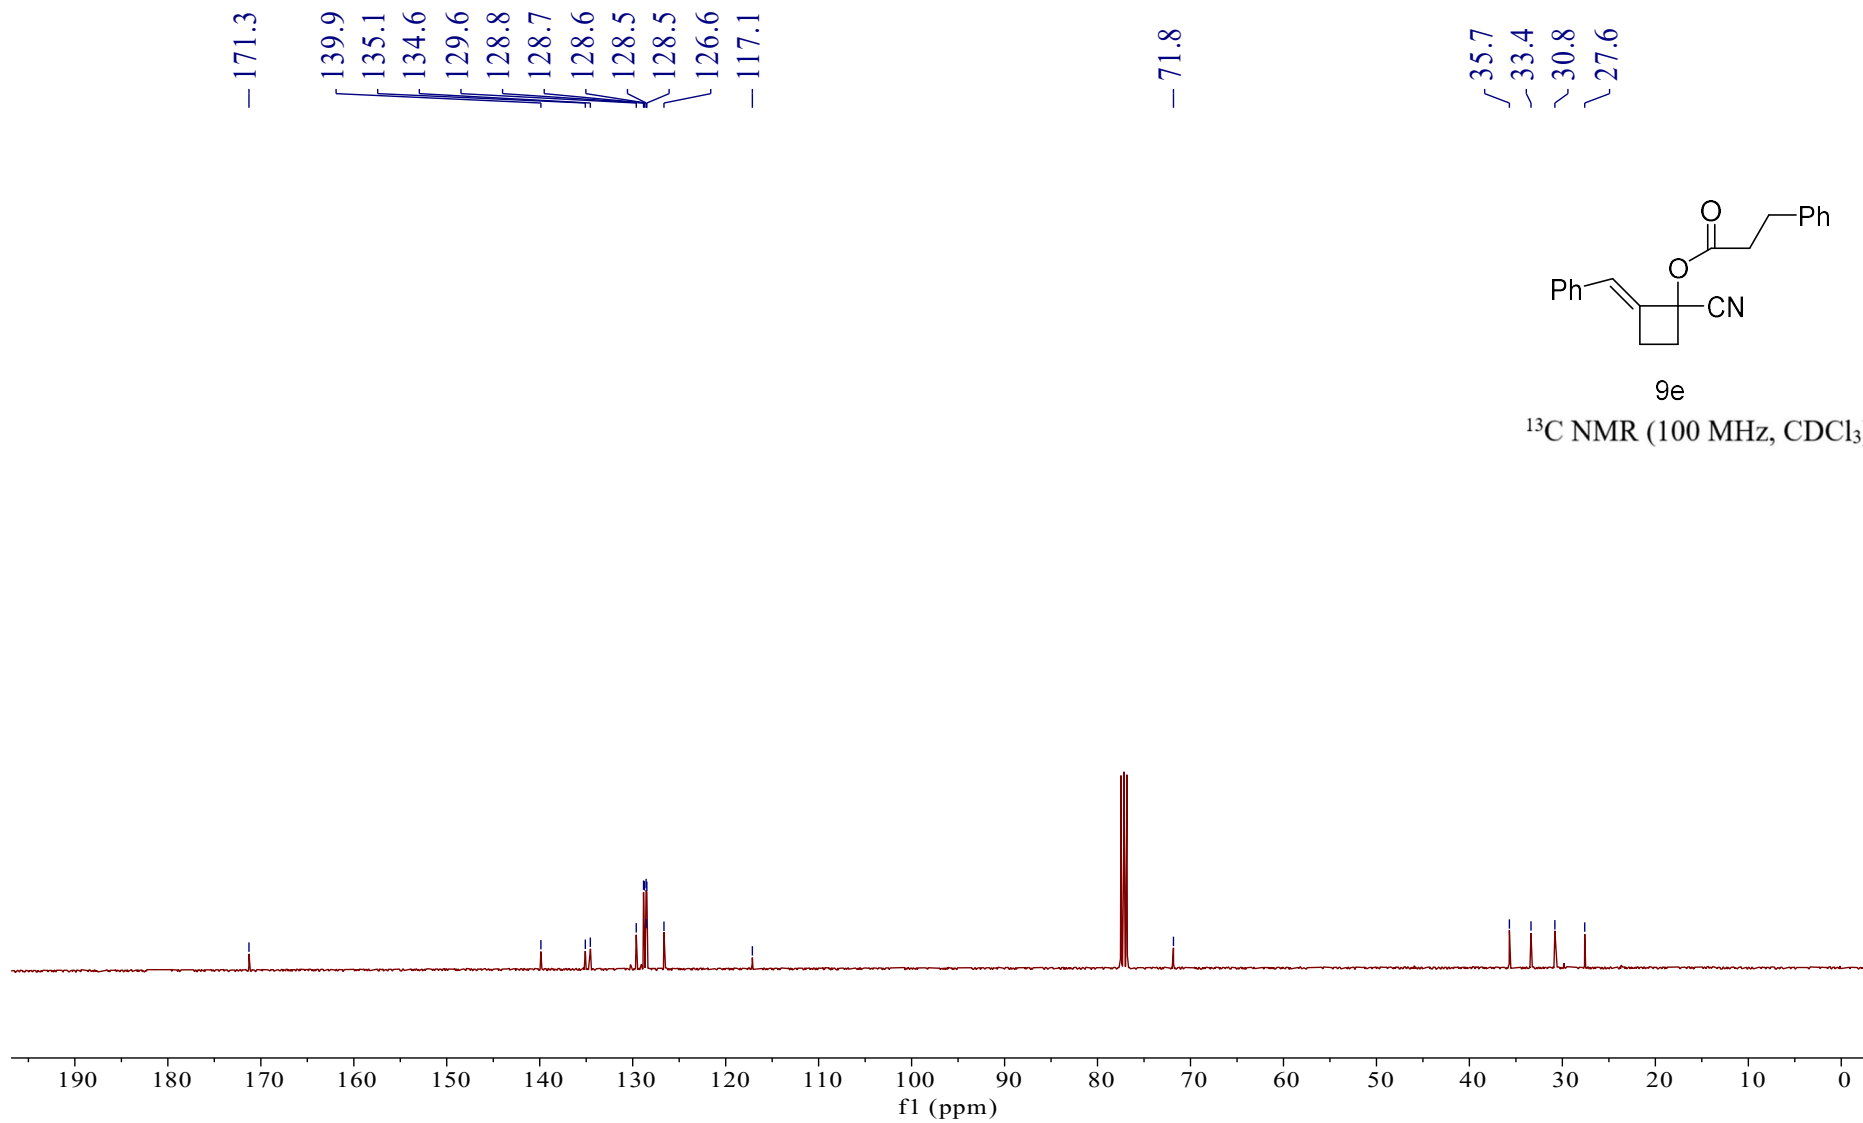

9e

$^{13}\text{C}$  NMR (100 MHz,  $\text{CDCl}_3$ )

NMR-109

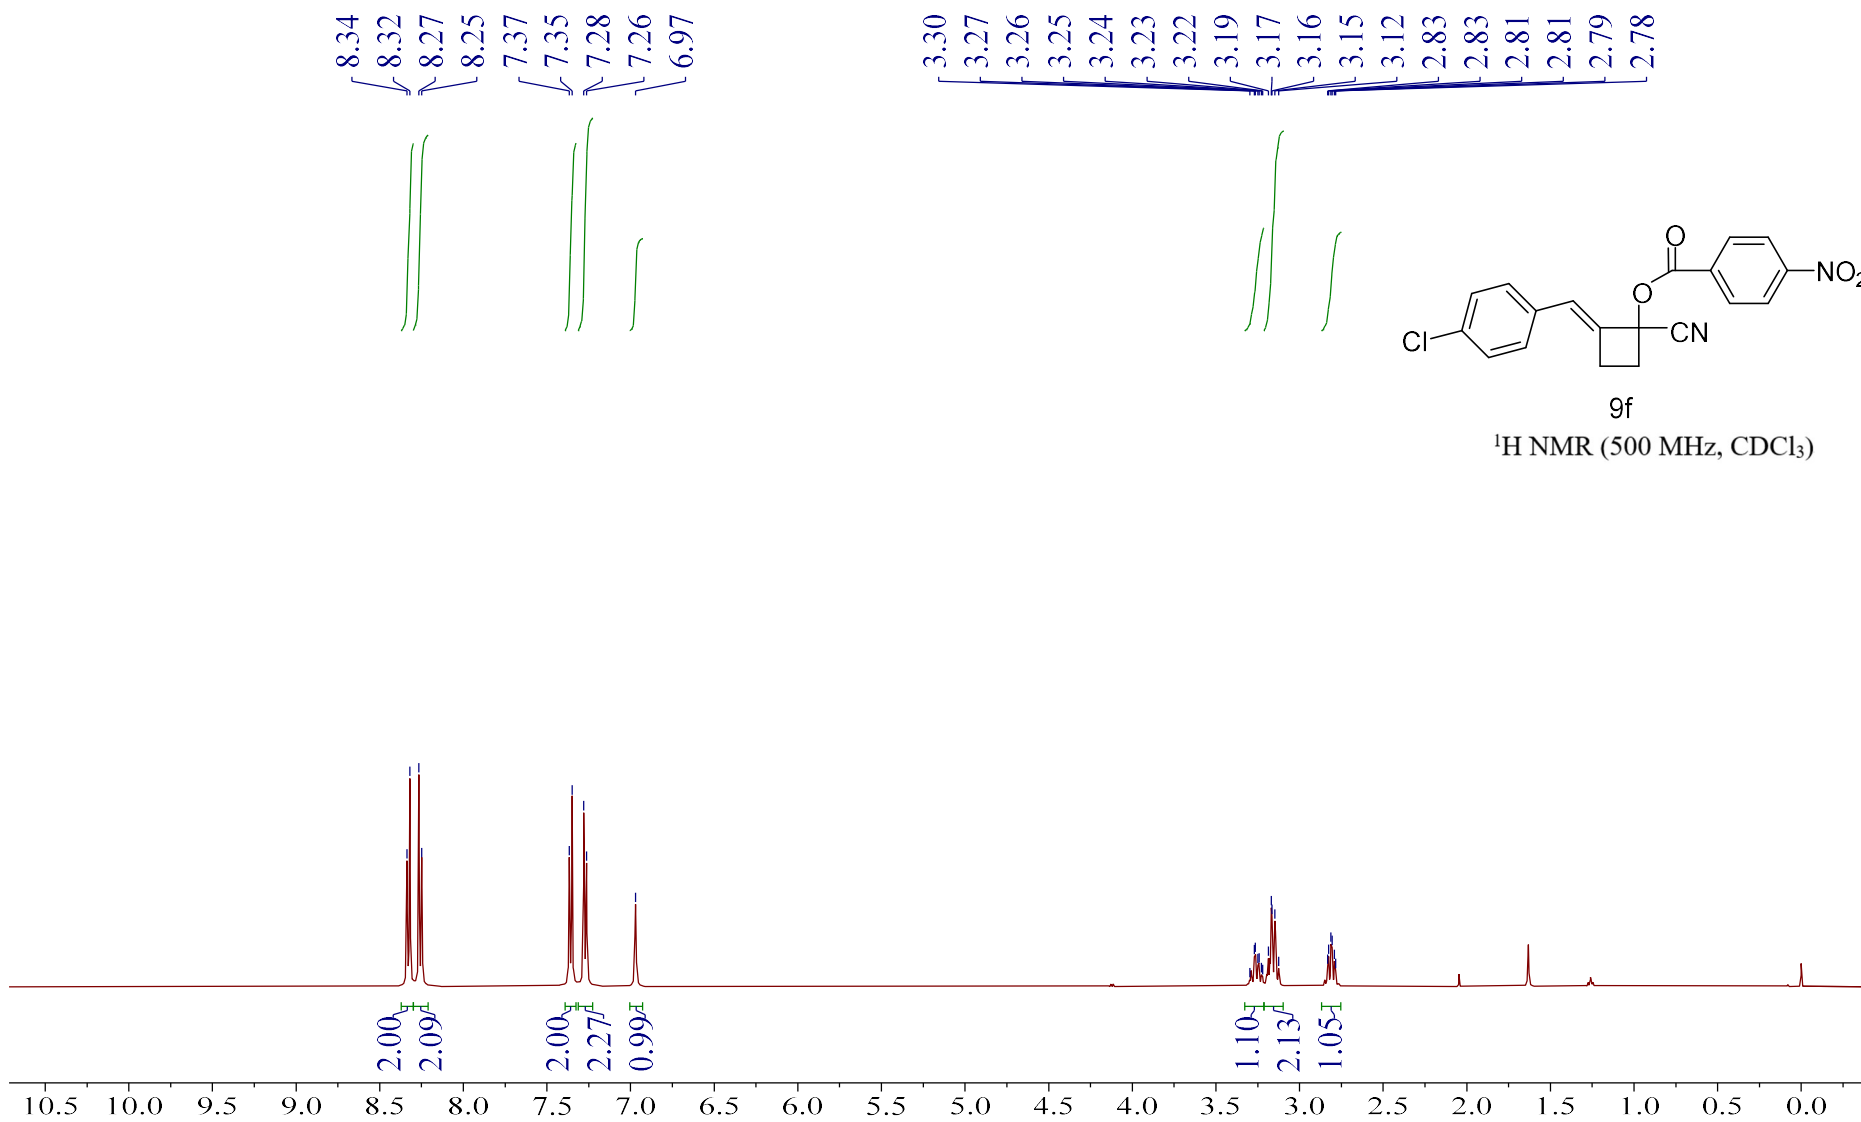

— 163.1  
— 151.1  
134.7  
134.6  
133.9  
133.3  
131.3  
129.8  
129.3  
129.1  
123.9  
116.5

— 72.9

— 33.3  
— 27.7

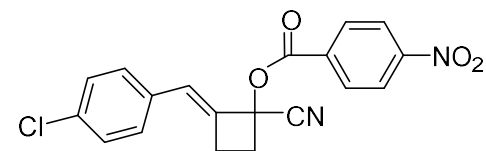

9f

<sup>13</sup>C NMR (100 MHz, CDCl<sub>3</sub>)

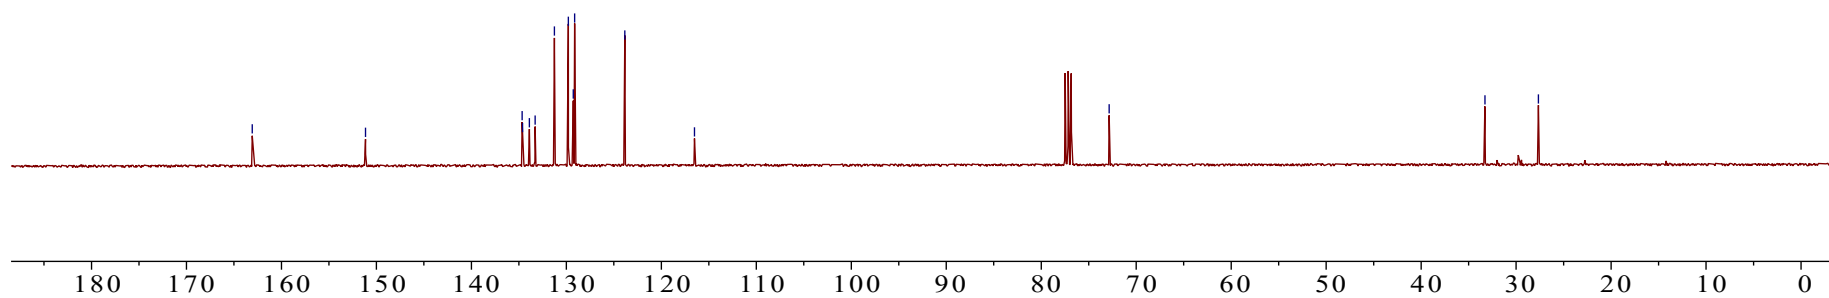

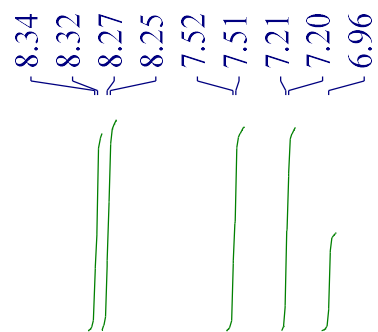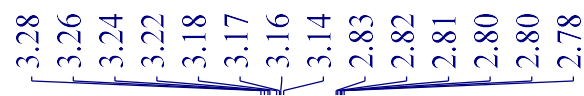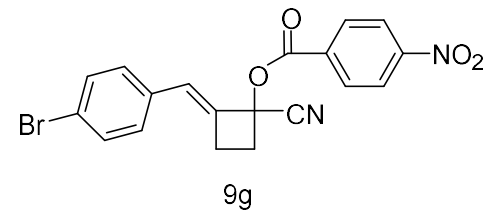

<sup>1</sup>H NMR (500 MHz, CDCl<sub>3</sub>)

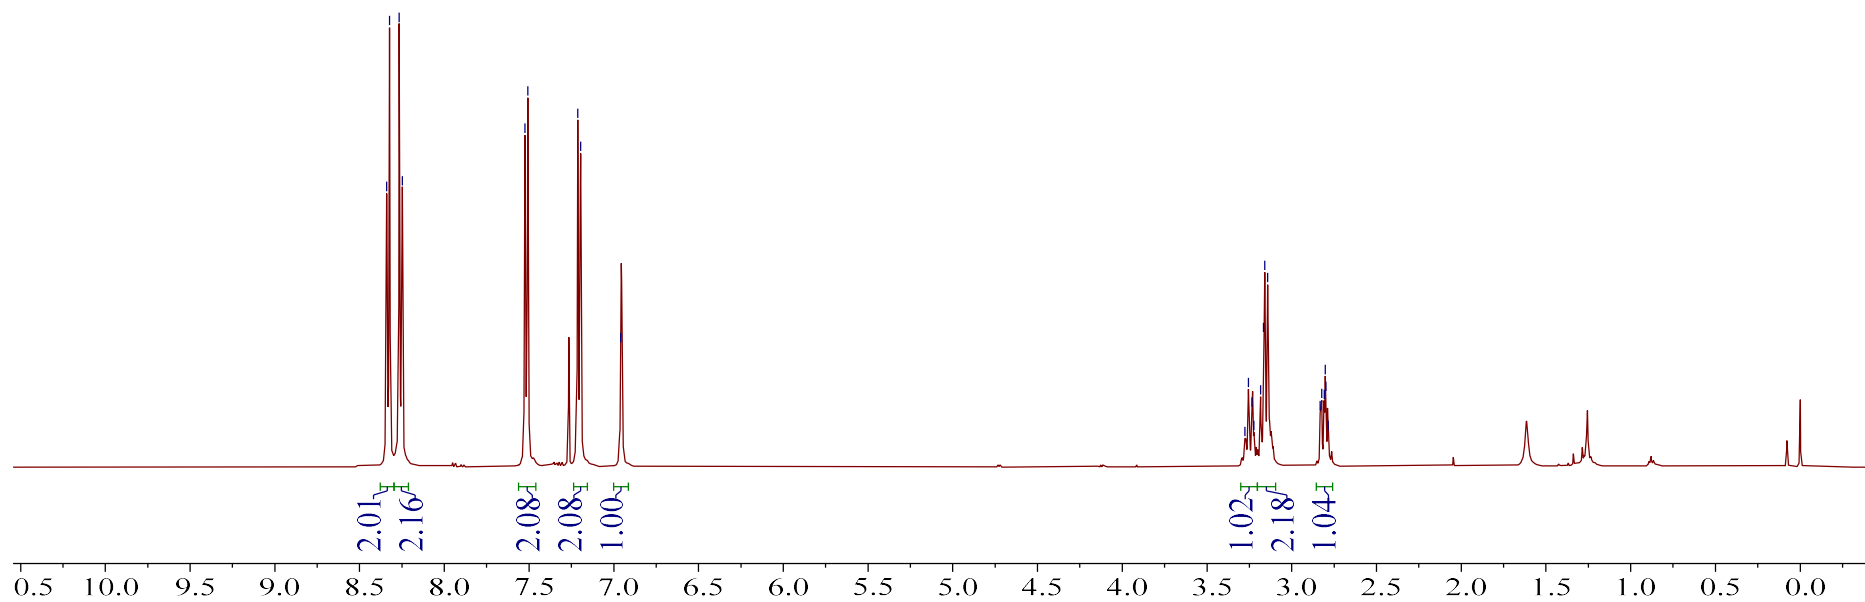

— 163.1  
— 151.2  
134.8  
133.9  
133.7  
132.2  
131.3  
130.1  
129.4  
123.9  
123.0  
116.5

— 72.9

— 33.3

— 27.7

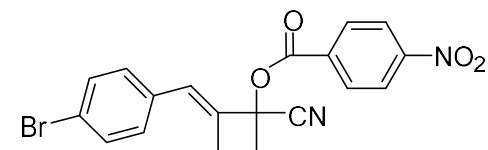

9g

<sup>13</sup>C NMR (100 MHz, CDCl<sub>3</sub>)

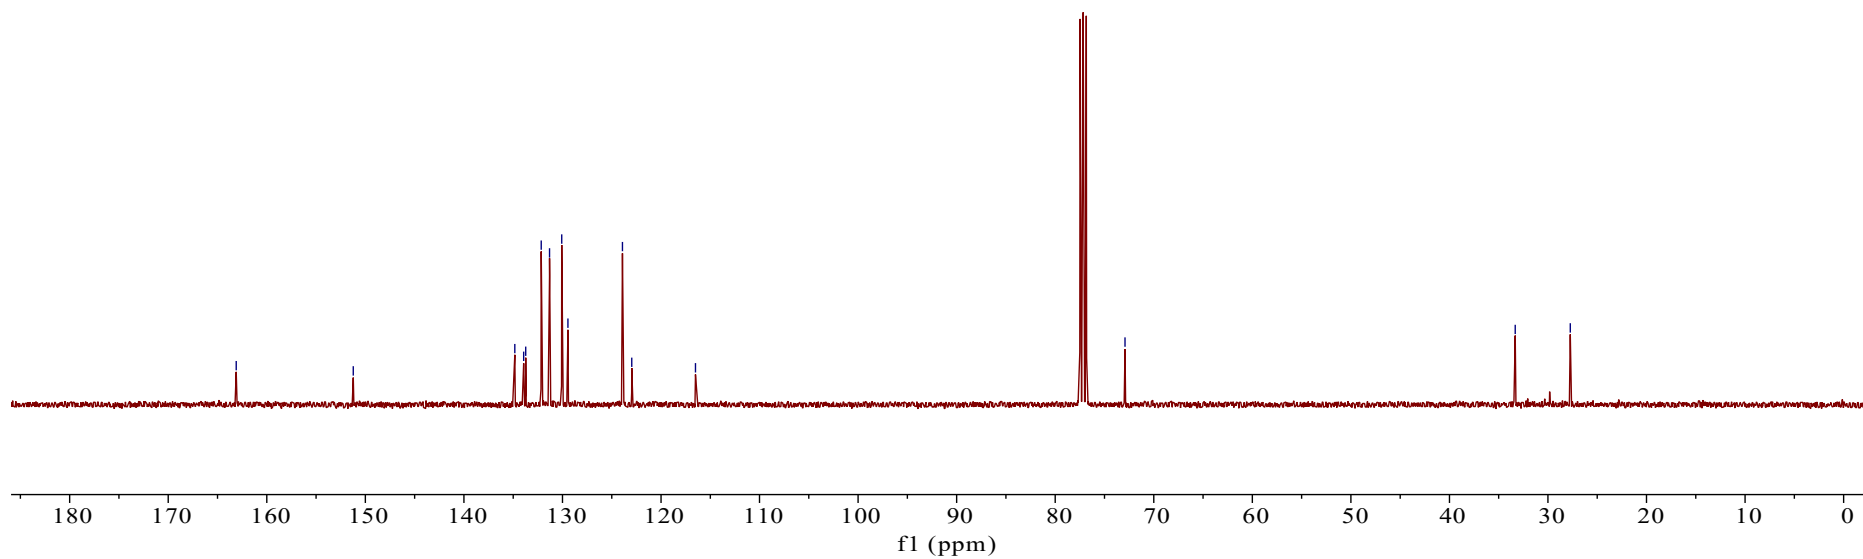

NMR-113

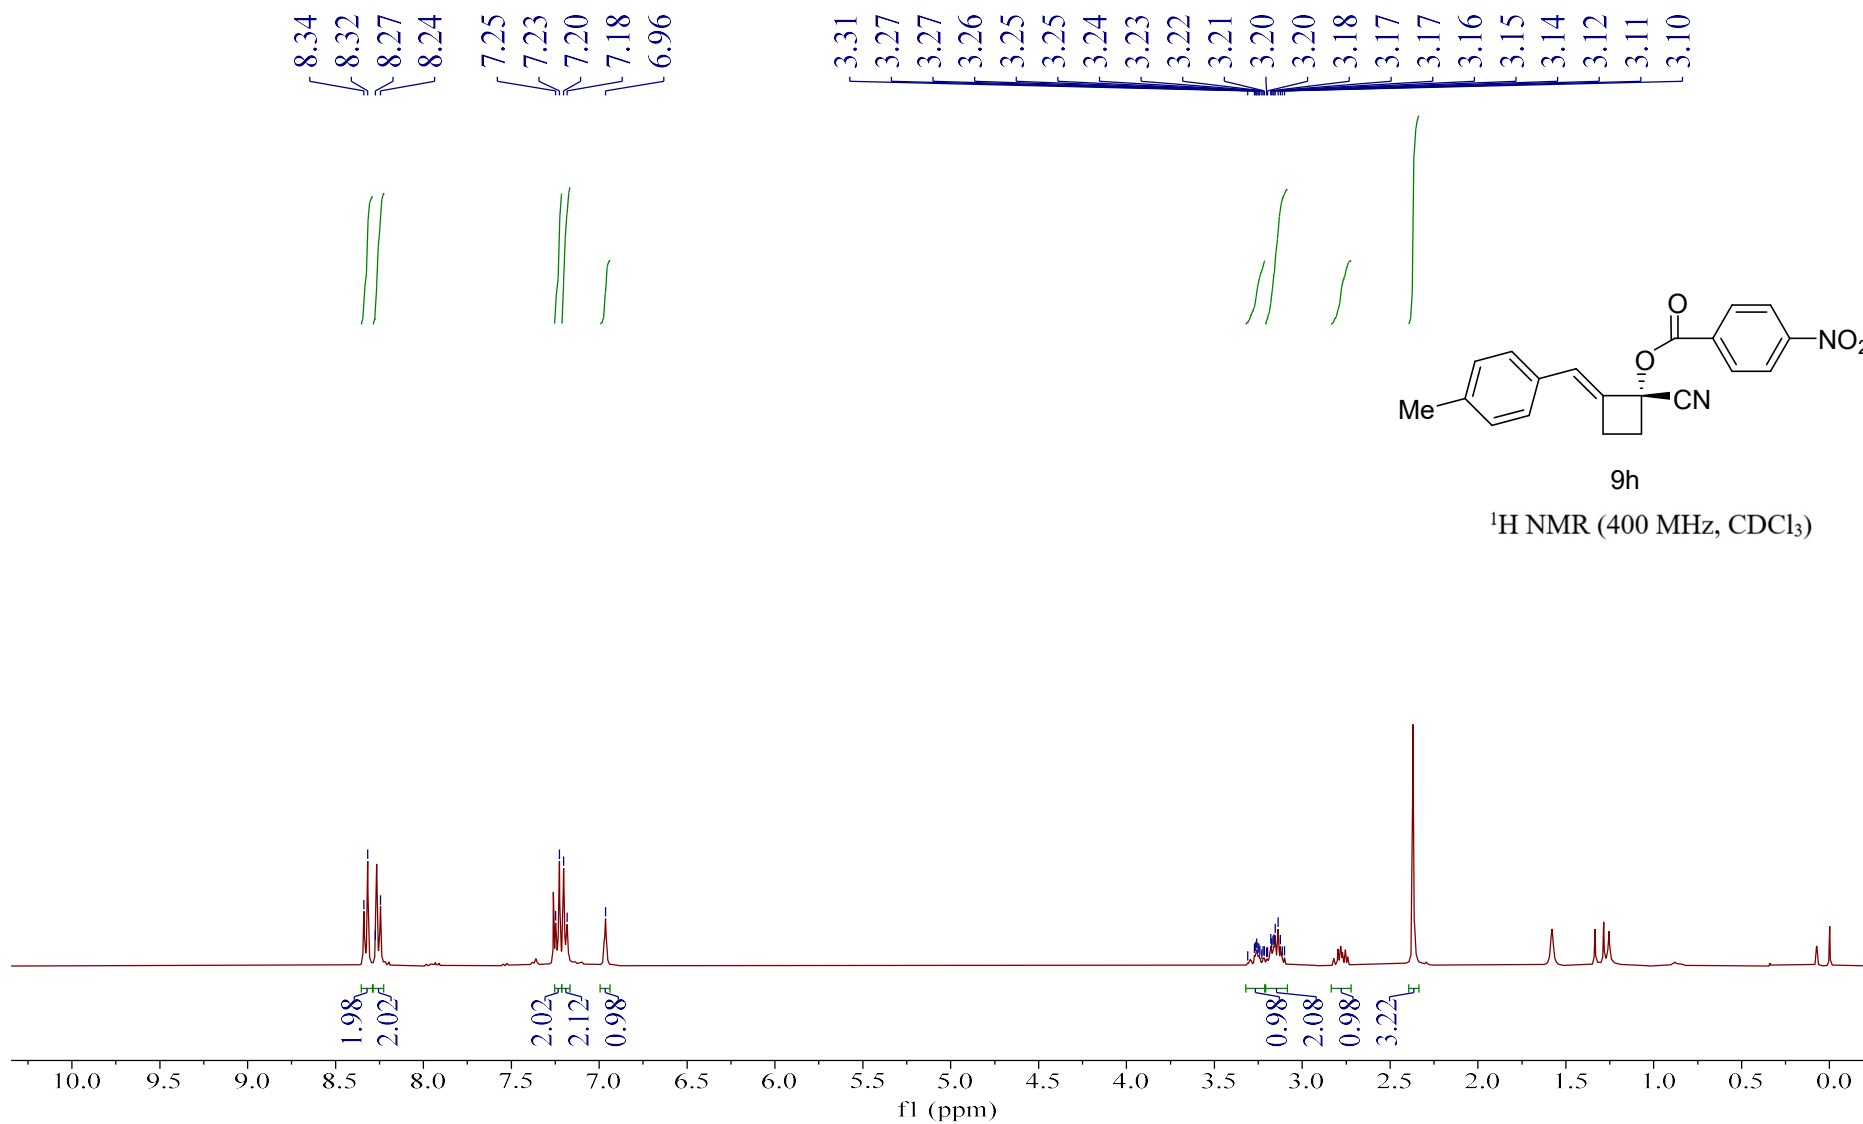

— 163.2  
— 151.2  
— 139.0  
— 134.1  
— 132.7  
— 132.1  
— 131.3  
— 130.5  
— 129.7  
— 128.6  
— 123.9  
— 116.8

— 73.1

— 33.4  
— 27.7  
— 21.5

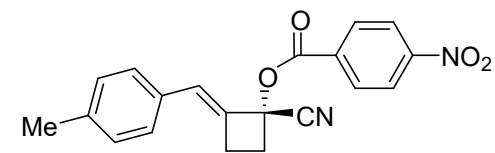

9h

<sup>13</sup>C NMR (100 MHz, CDCl<sub>3</sub>)

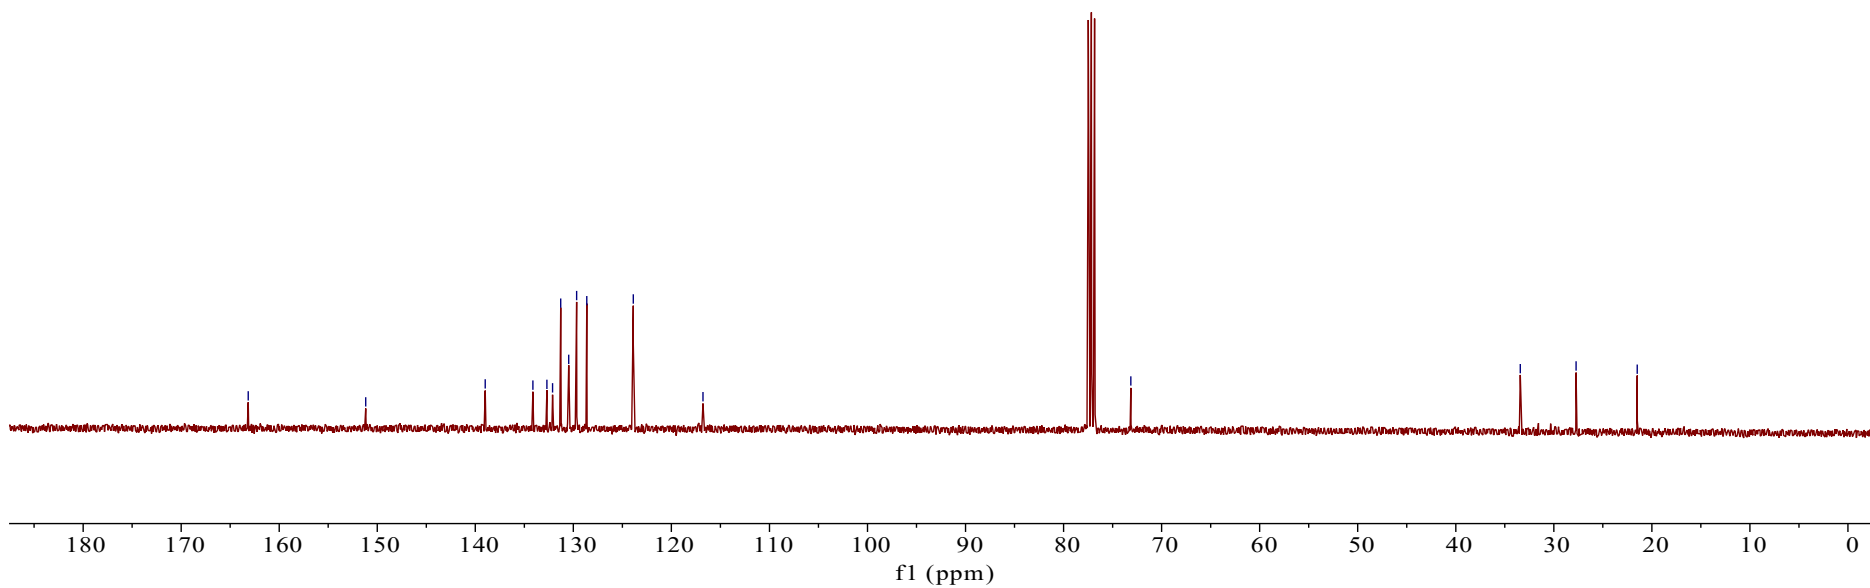

NMR-115

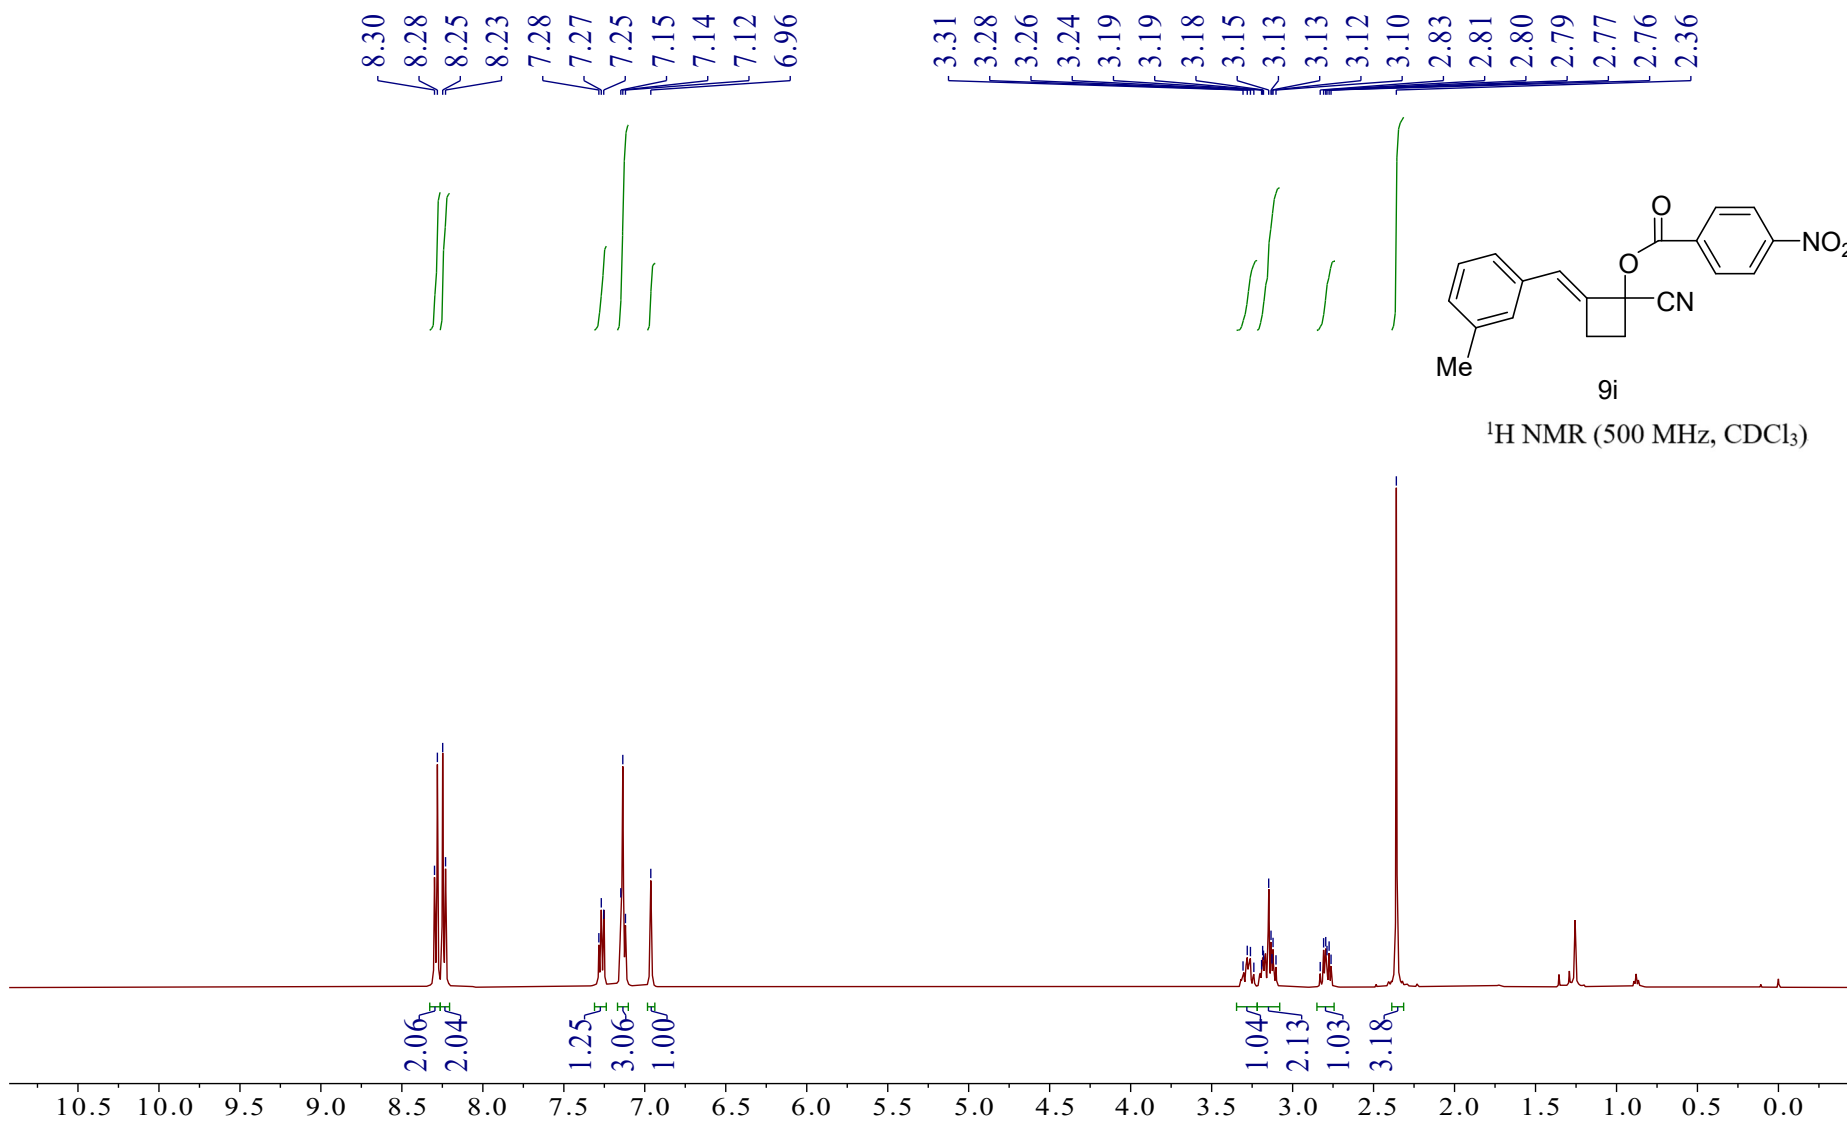



163.0  
151.0  
138.4  
134.7  
133.9  
133.6  
131.1  
130.3  
129.5  
129.4  
128.7  
125.5  
123.7  
116.6

72.9

33.3  
27.7  
21.4

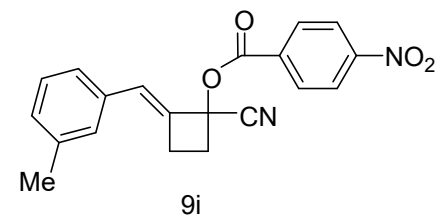

<sup>13</sup>C NMR (125 MHz, CDCl<sub>3</sub>)

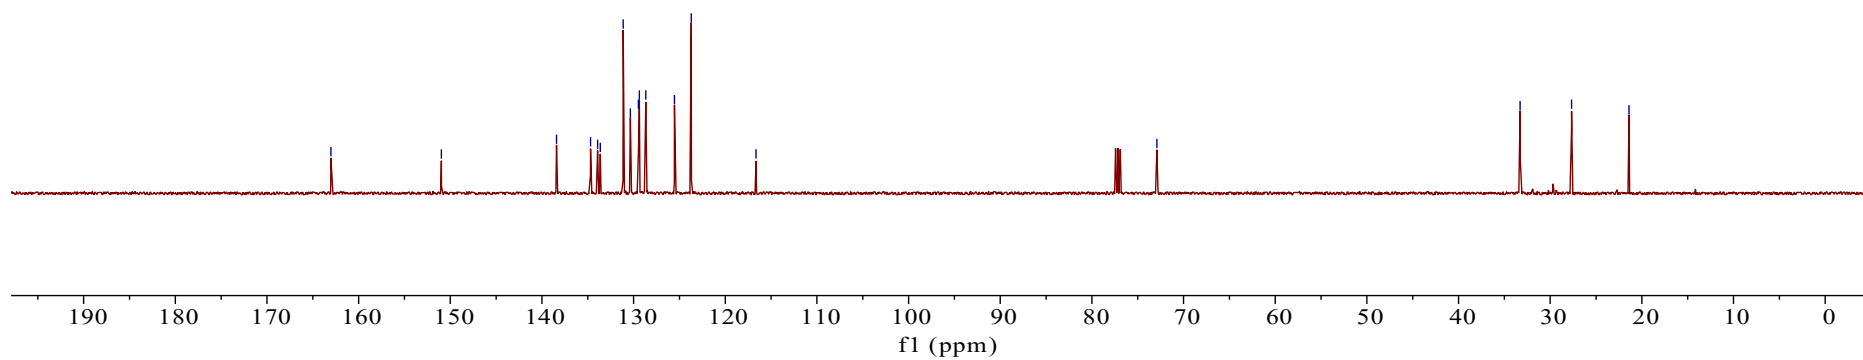

NMR-117

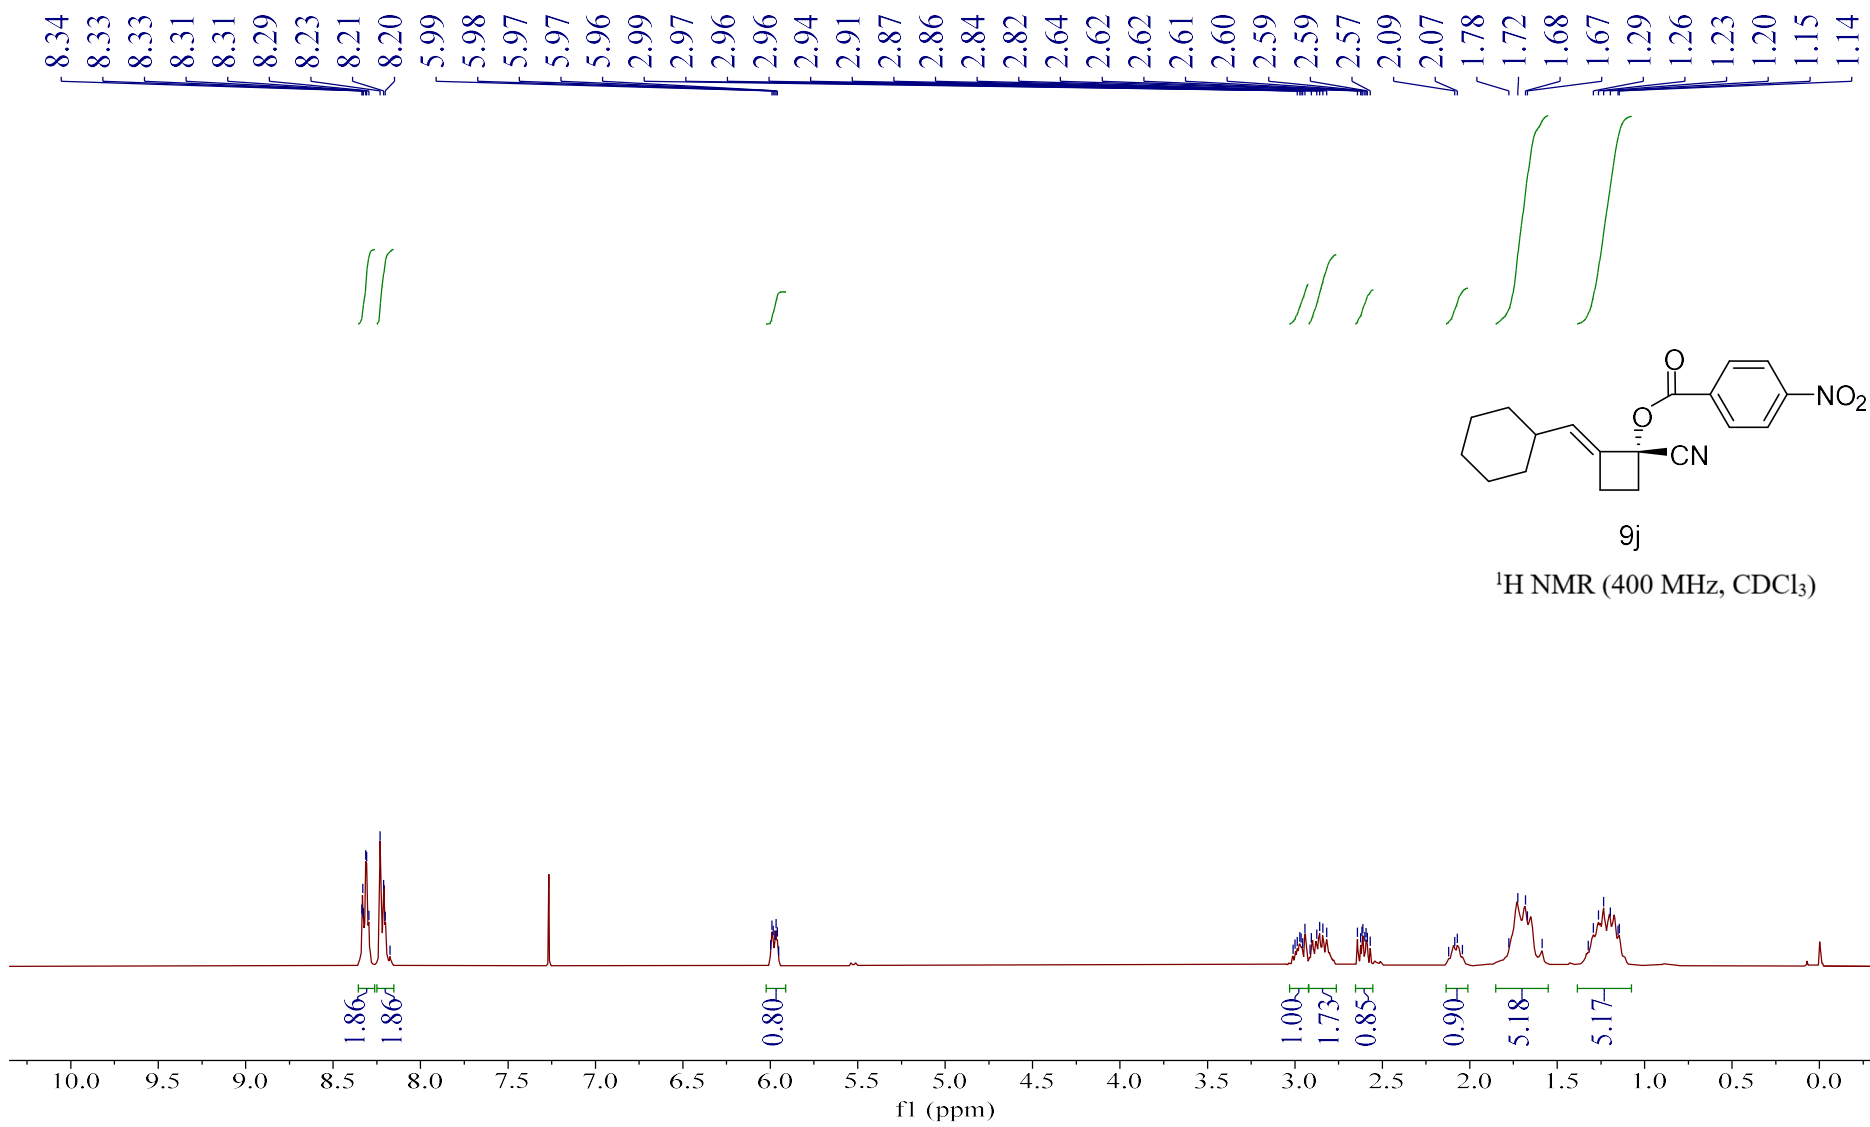

NMR-118

- 163.1

- 151.1

~ 137.6

~ 134.2

~ 131.2

~ 123.8

~ 117.1

- 72.4

37.8

32.5

32.4

32.2

25.9

25.8

24.7

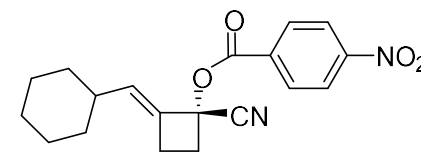

9j

<sup>13</sup>C NMR (100 MHz, CDCl<sub>3</sub>)

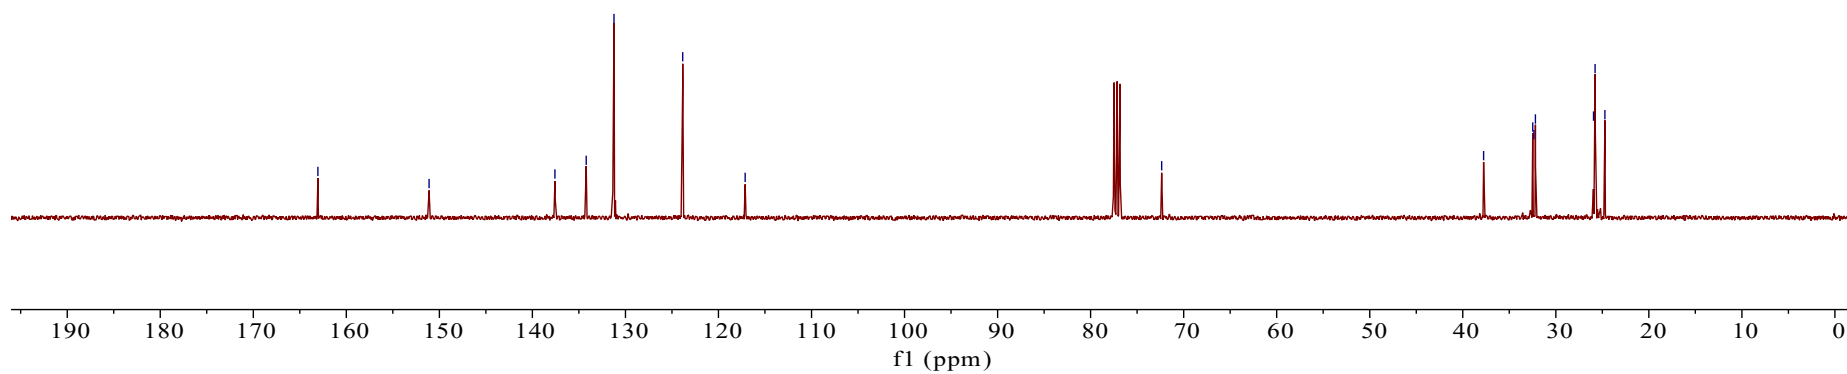

NMR-119

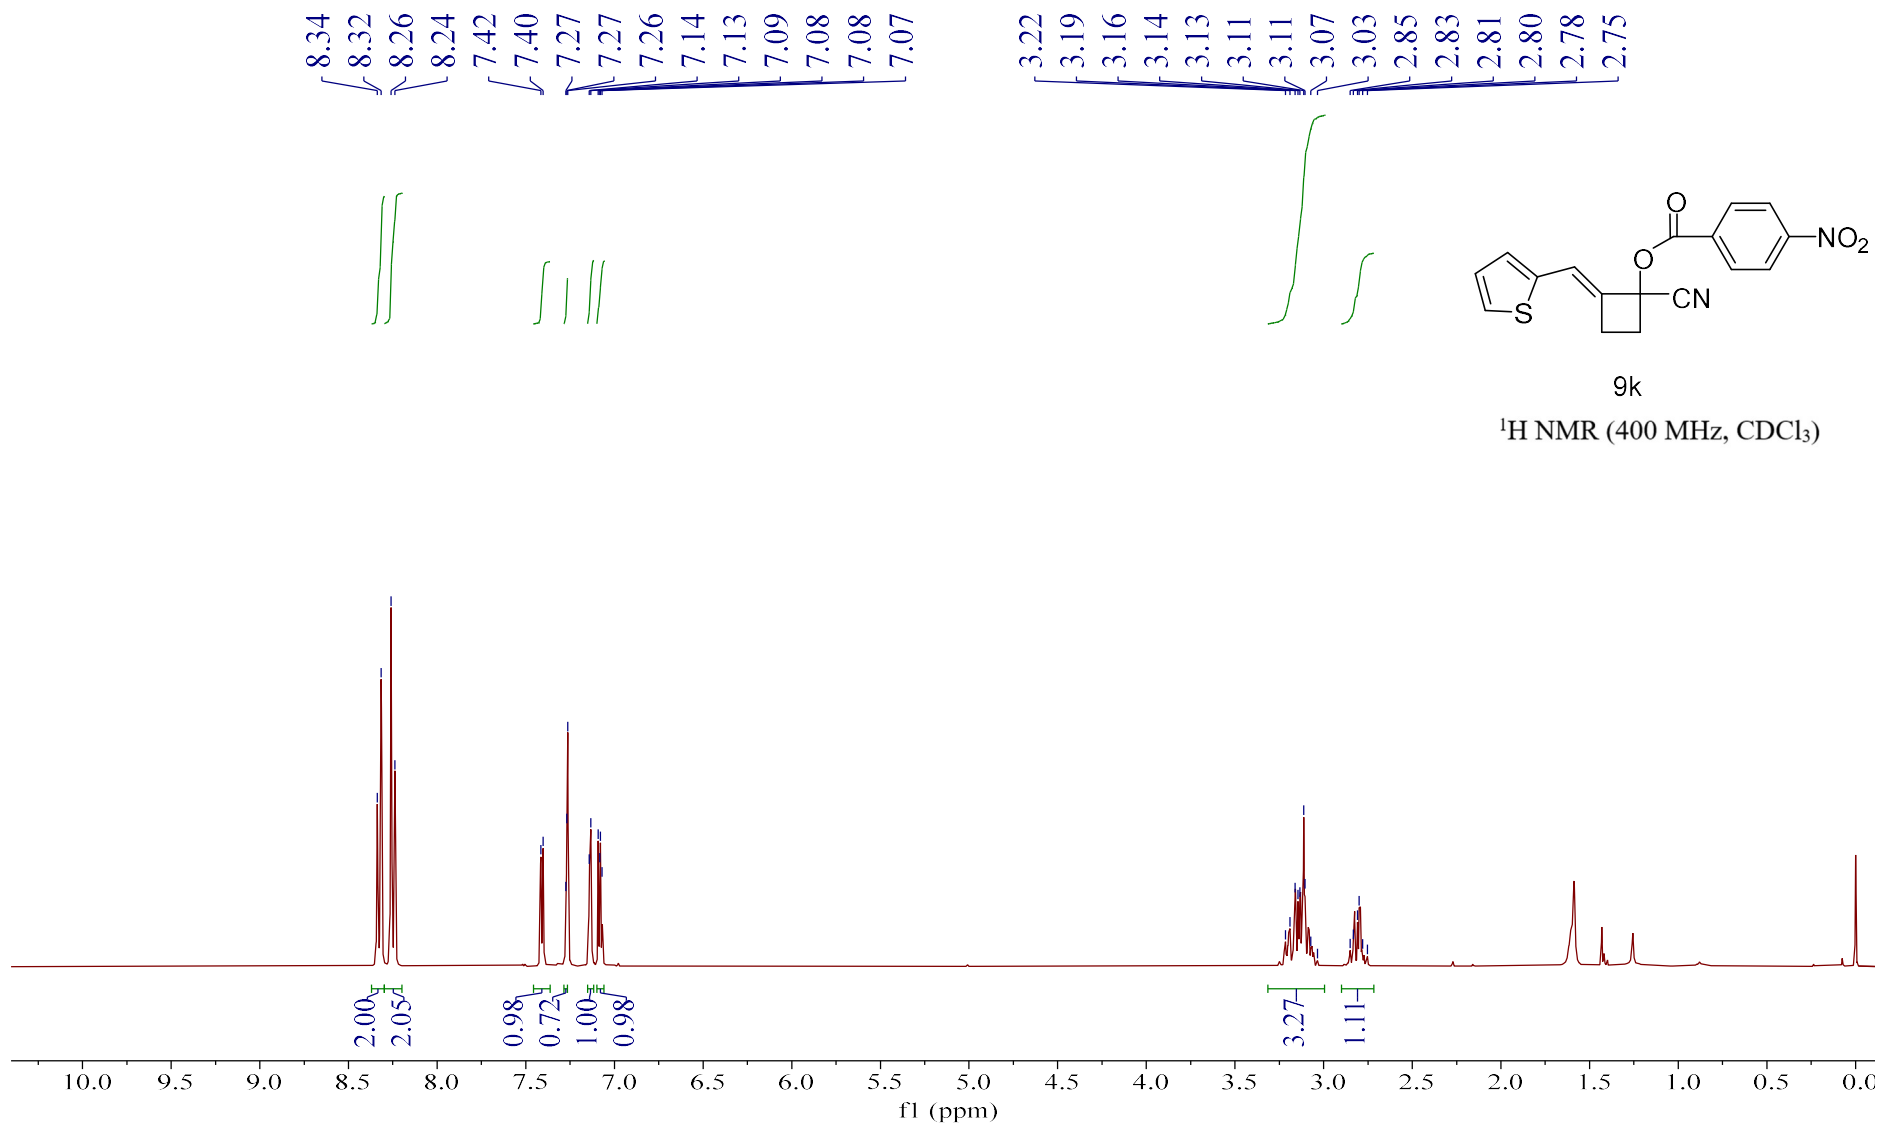

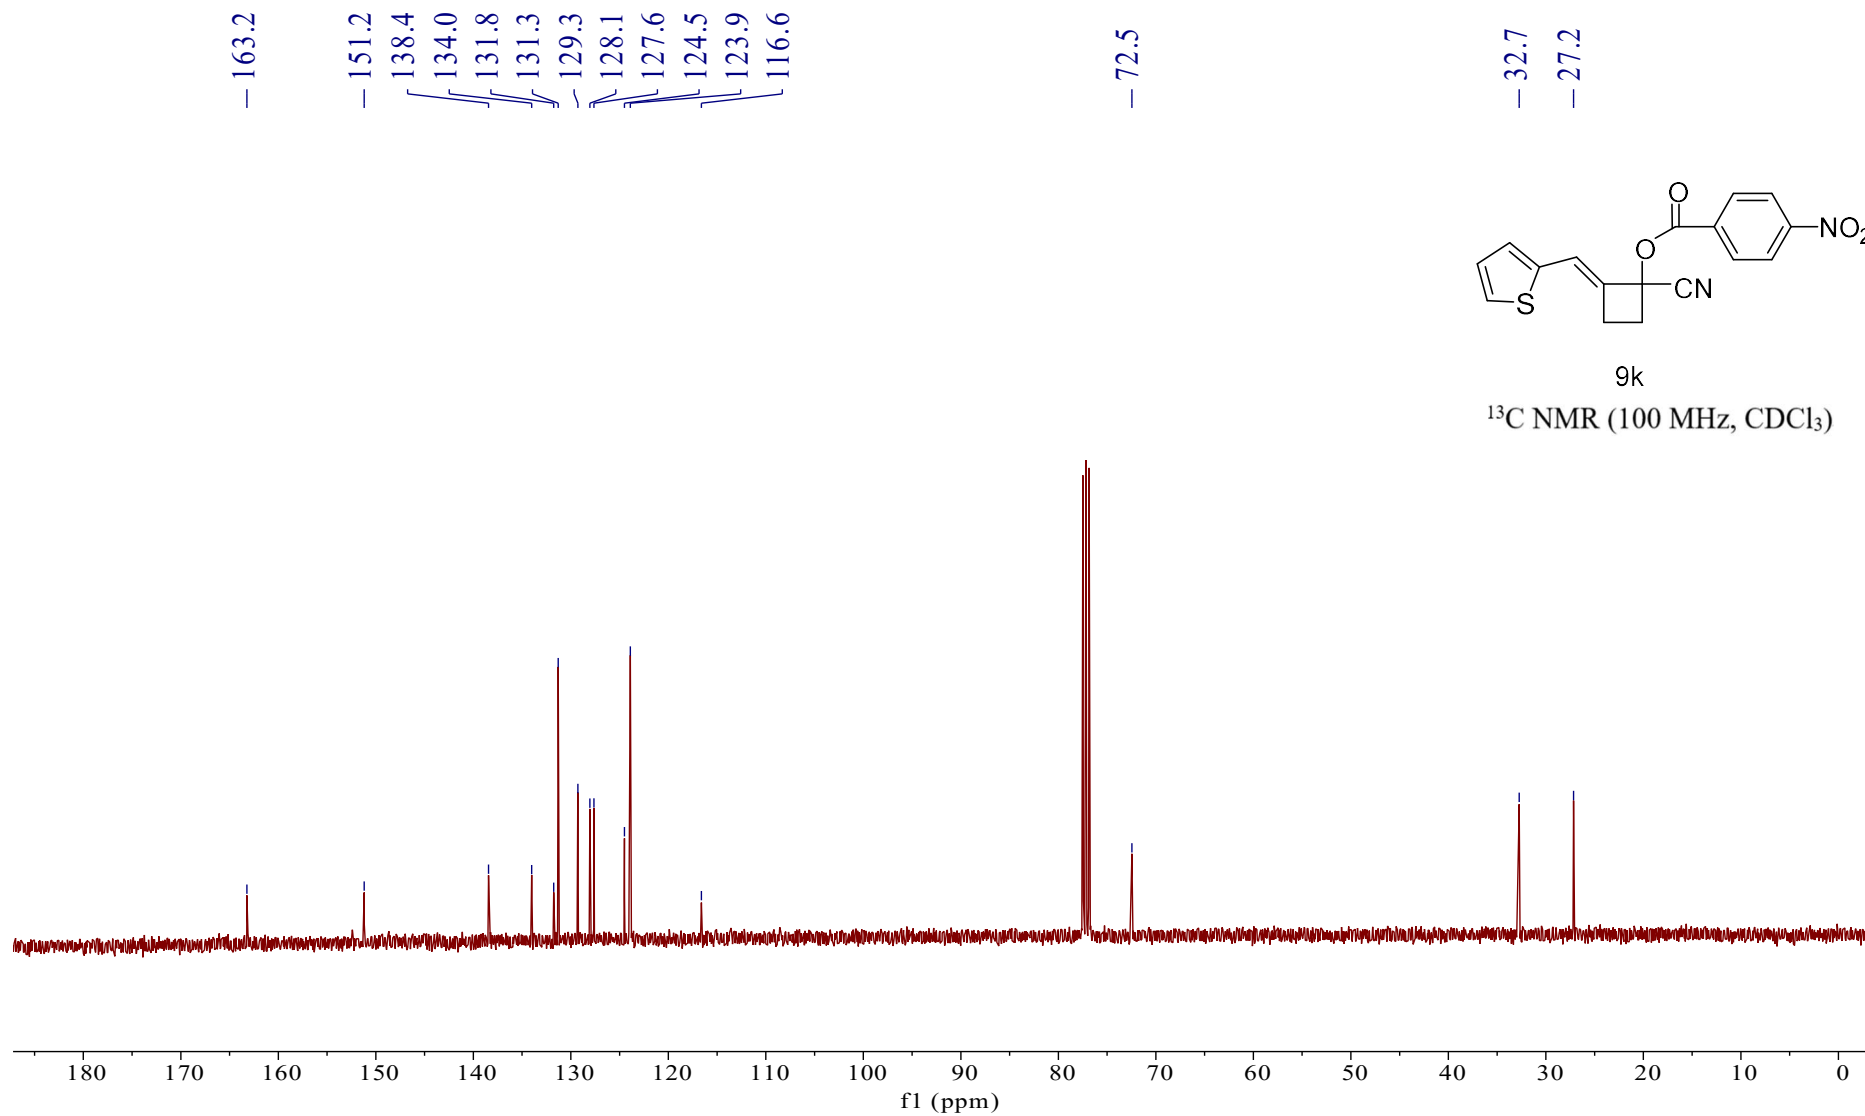

NMR-121

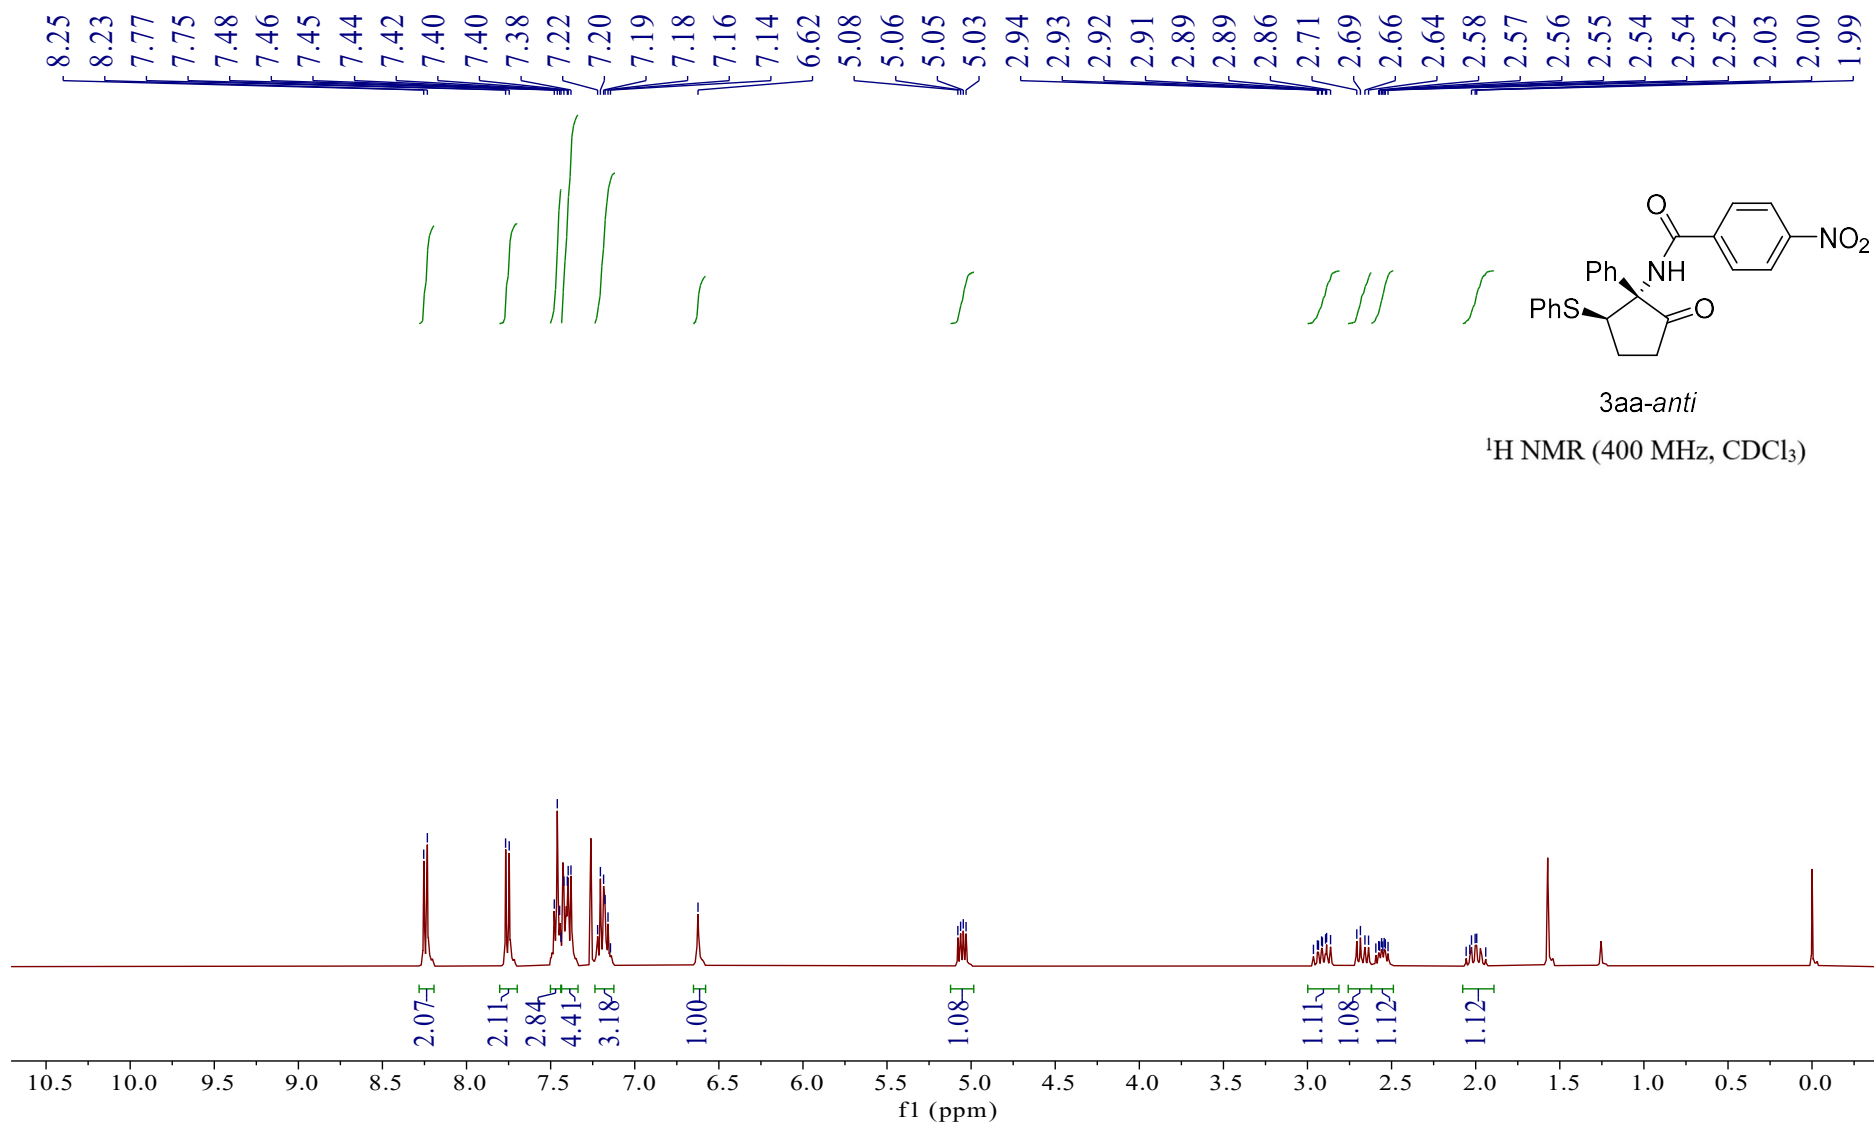

NMR-122

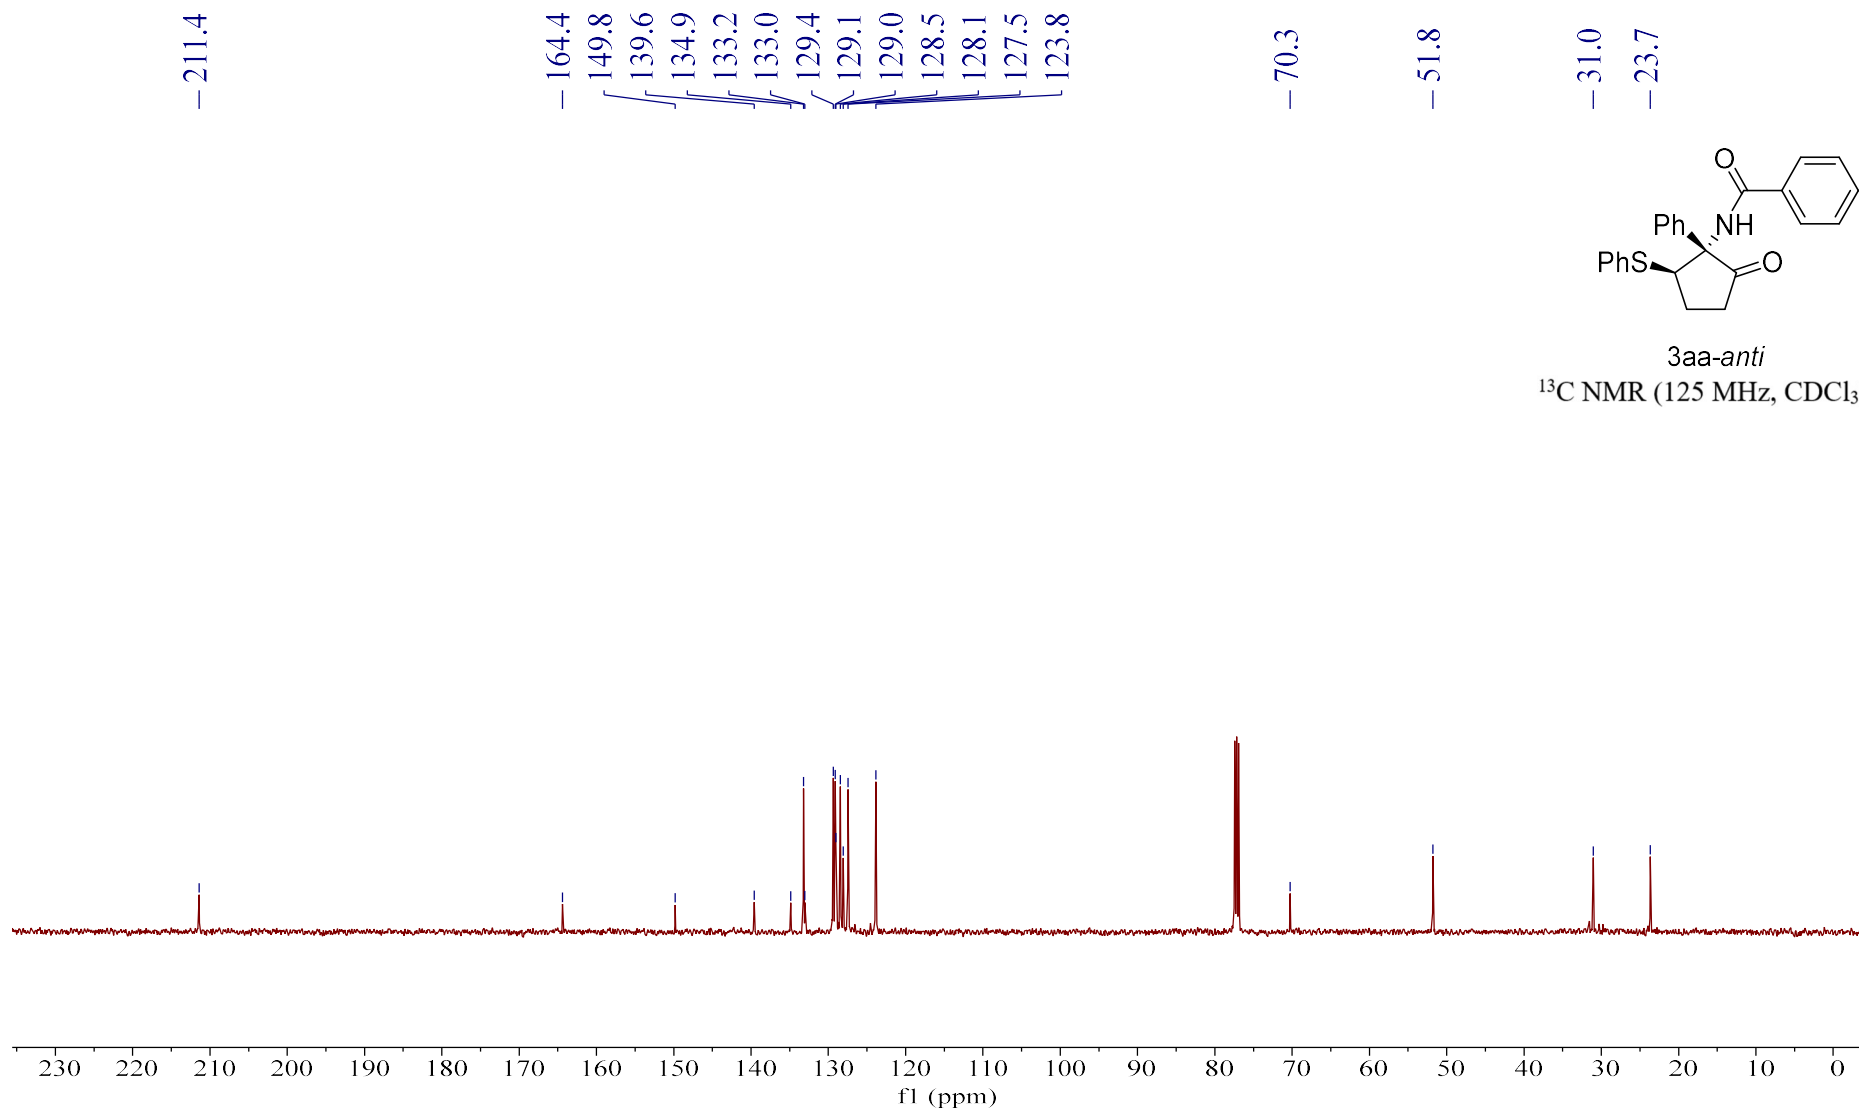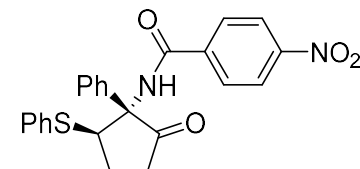

3aa-anti

<sup>13</sup>C NMR (125 MHz, CDCl<sub>3</sub>)

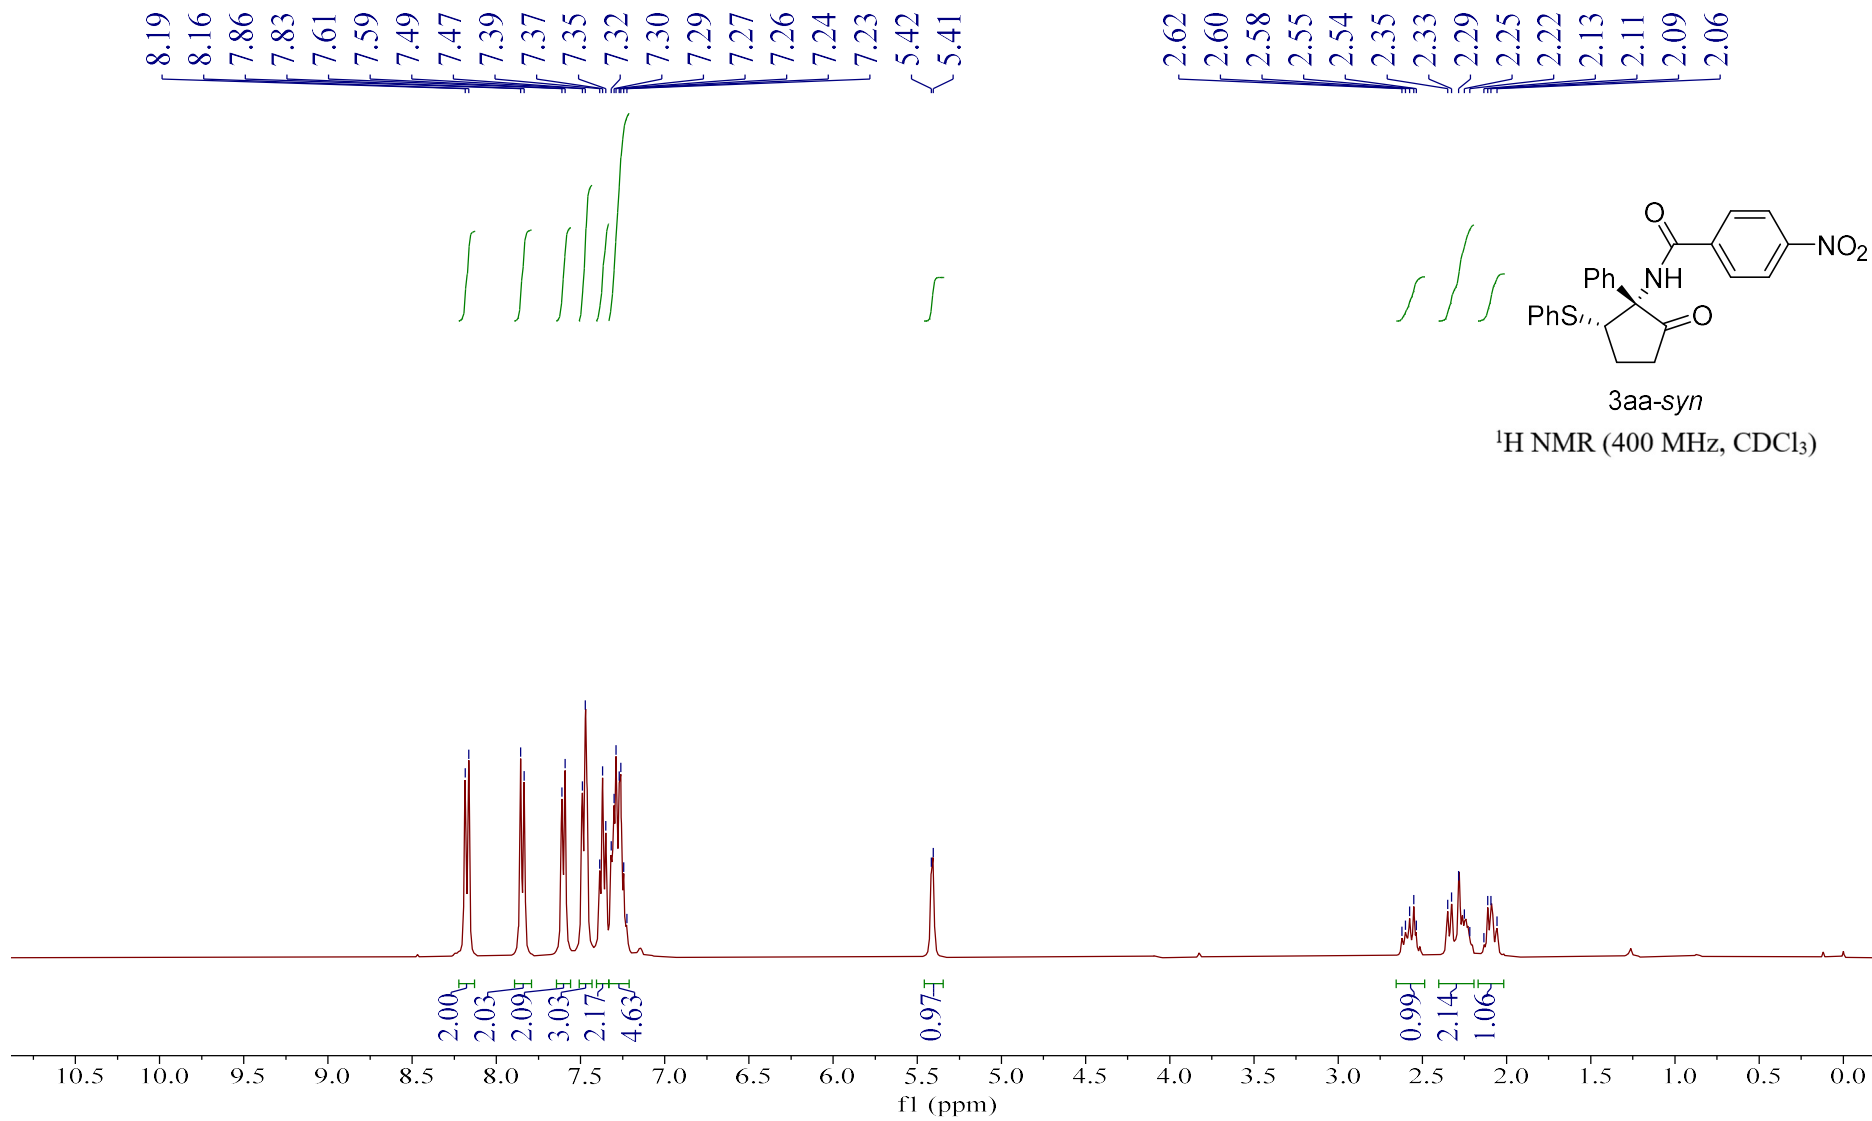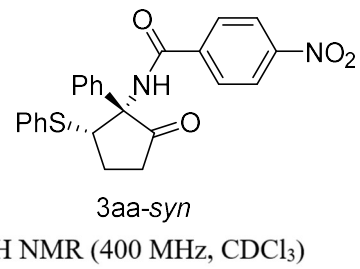



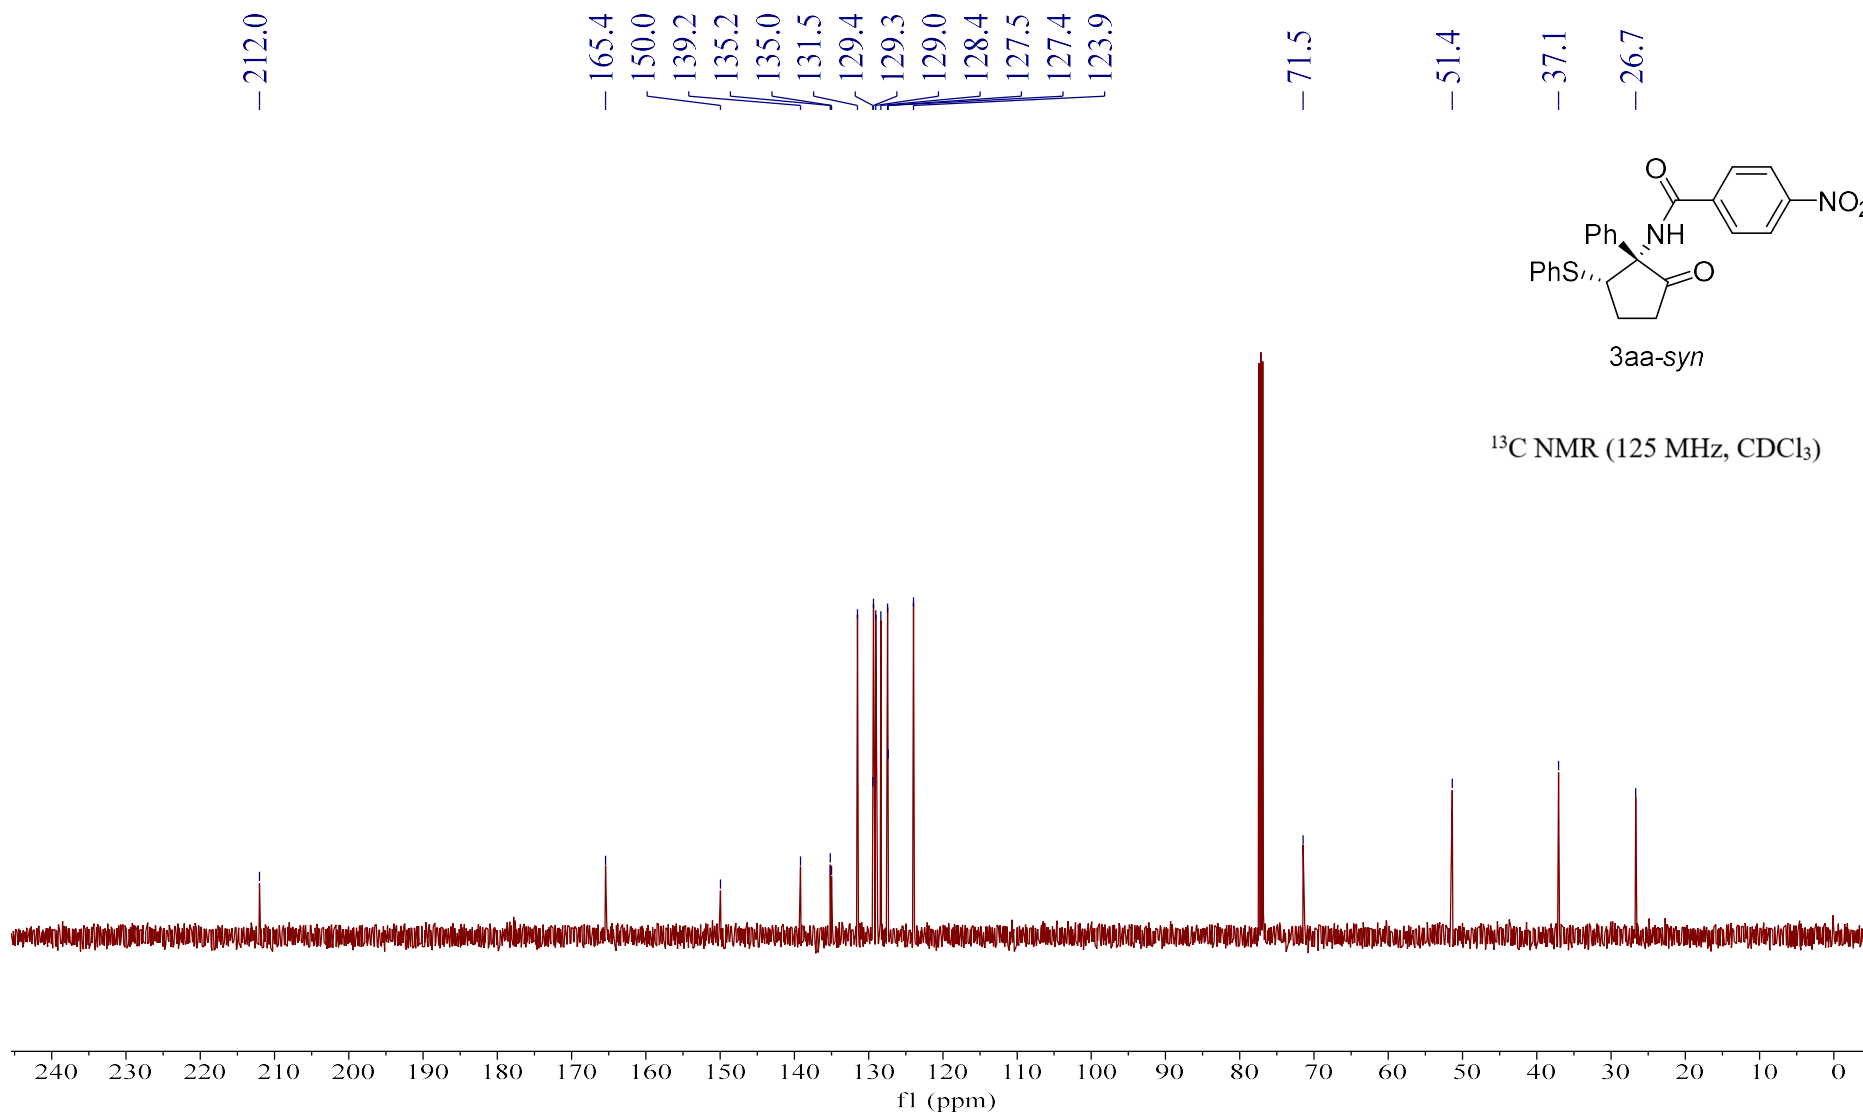

NMR-125

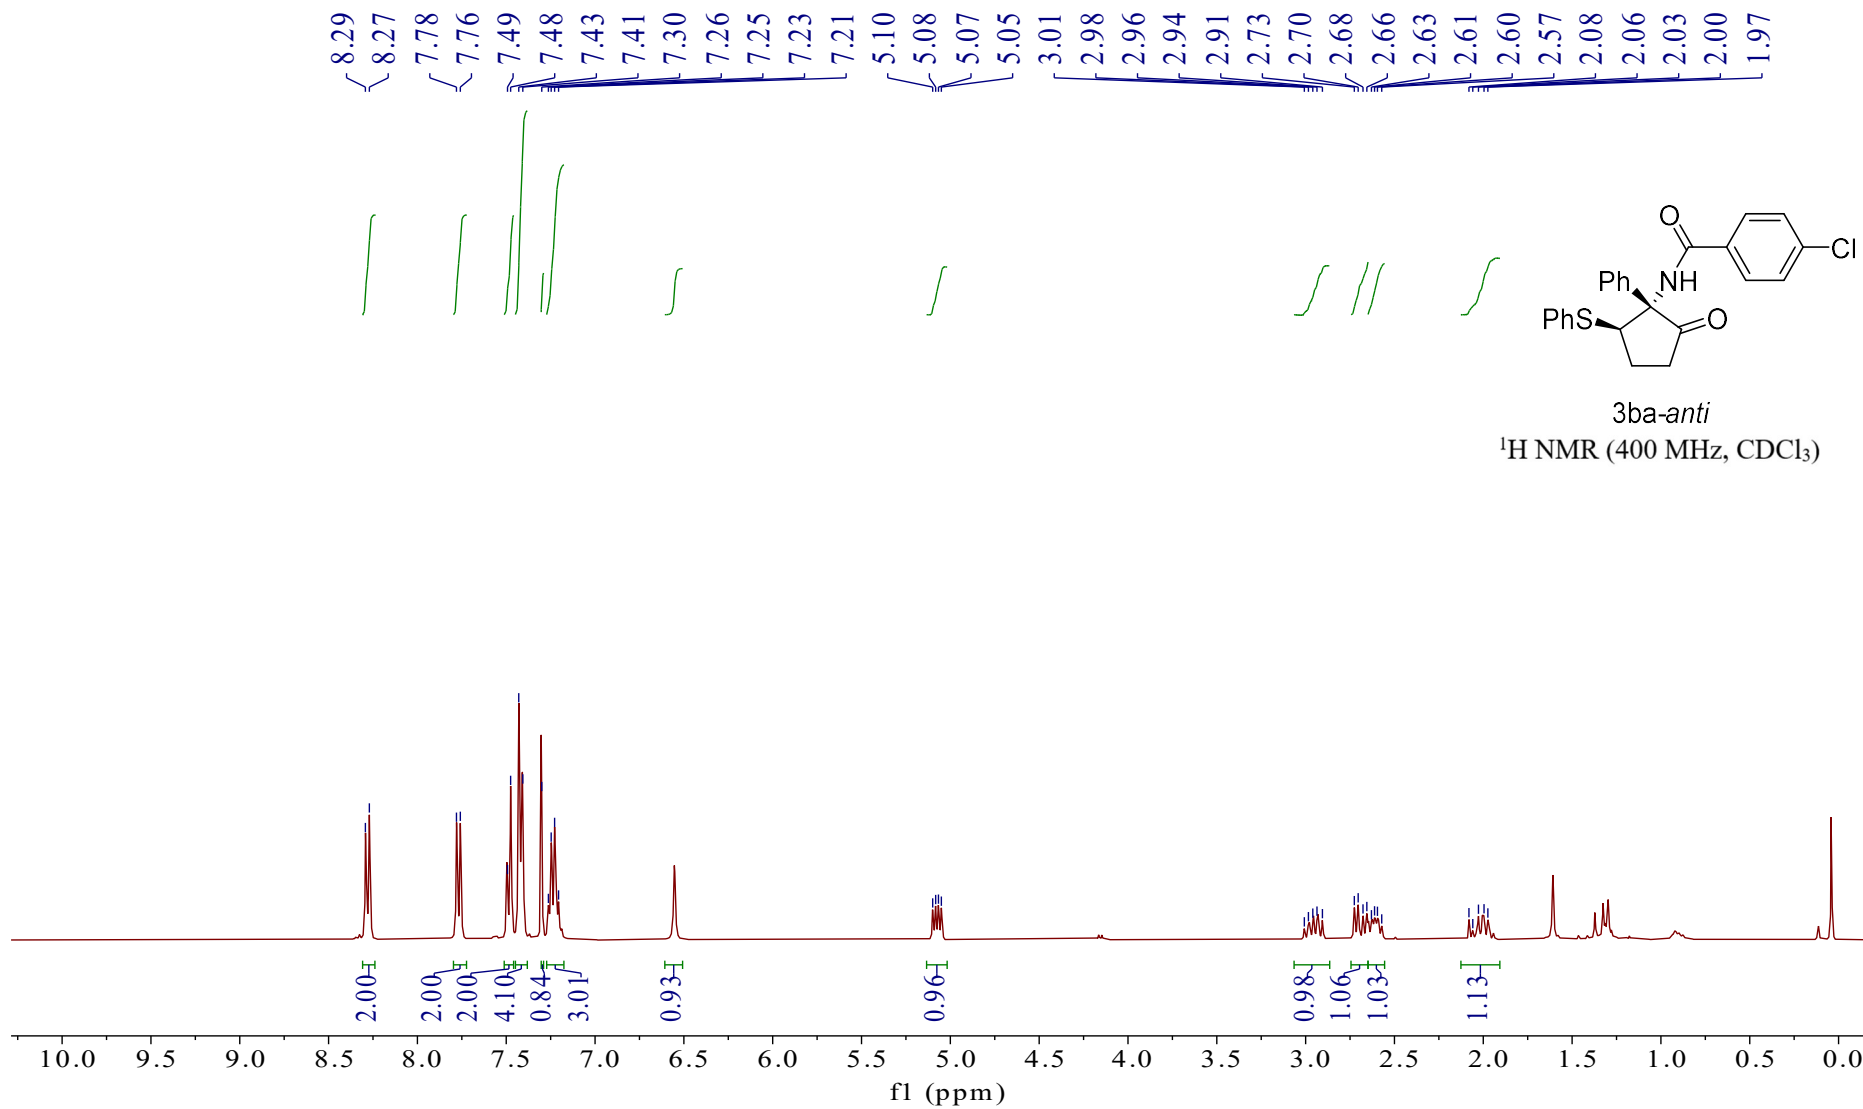

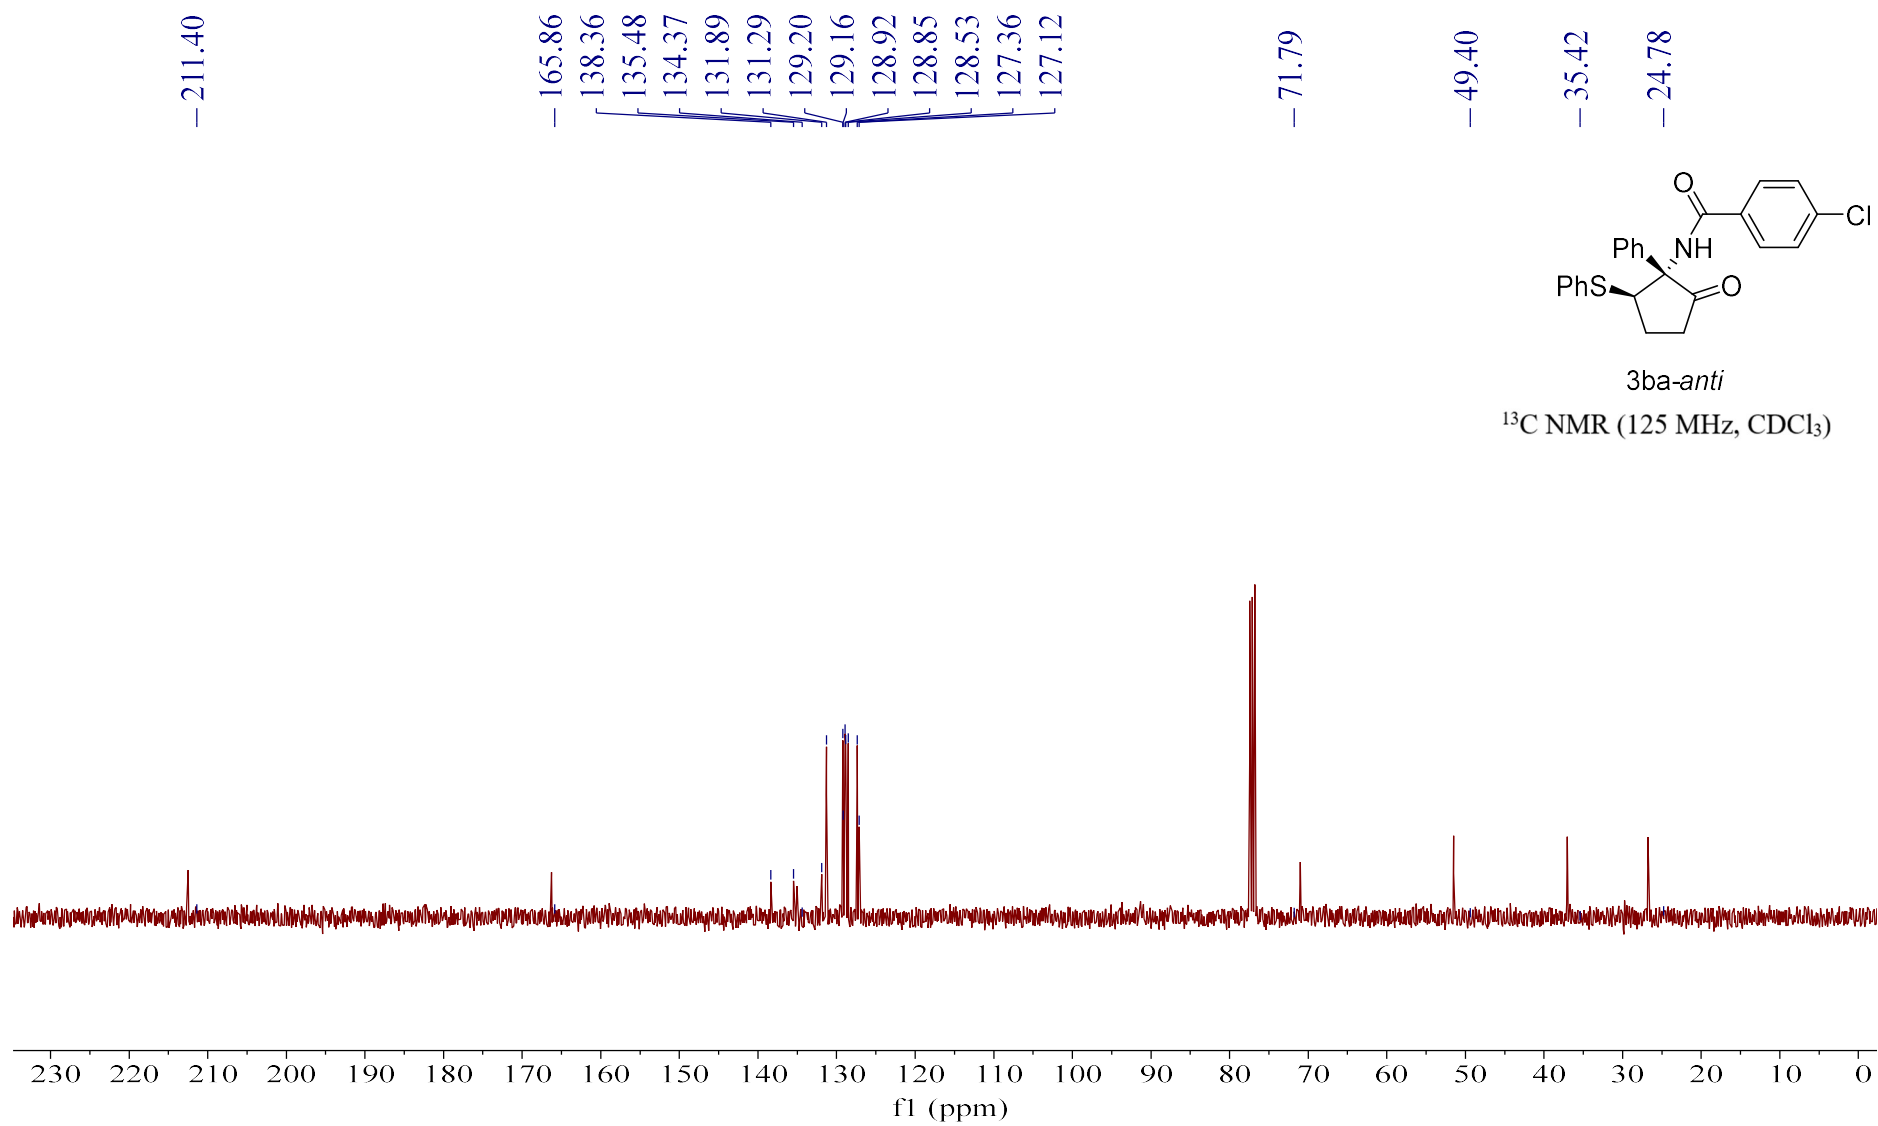

NMR-127

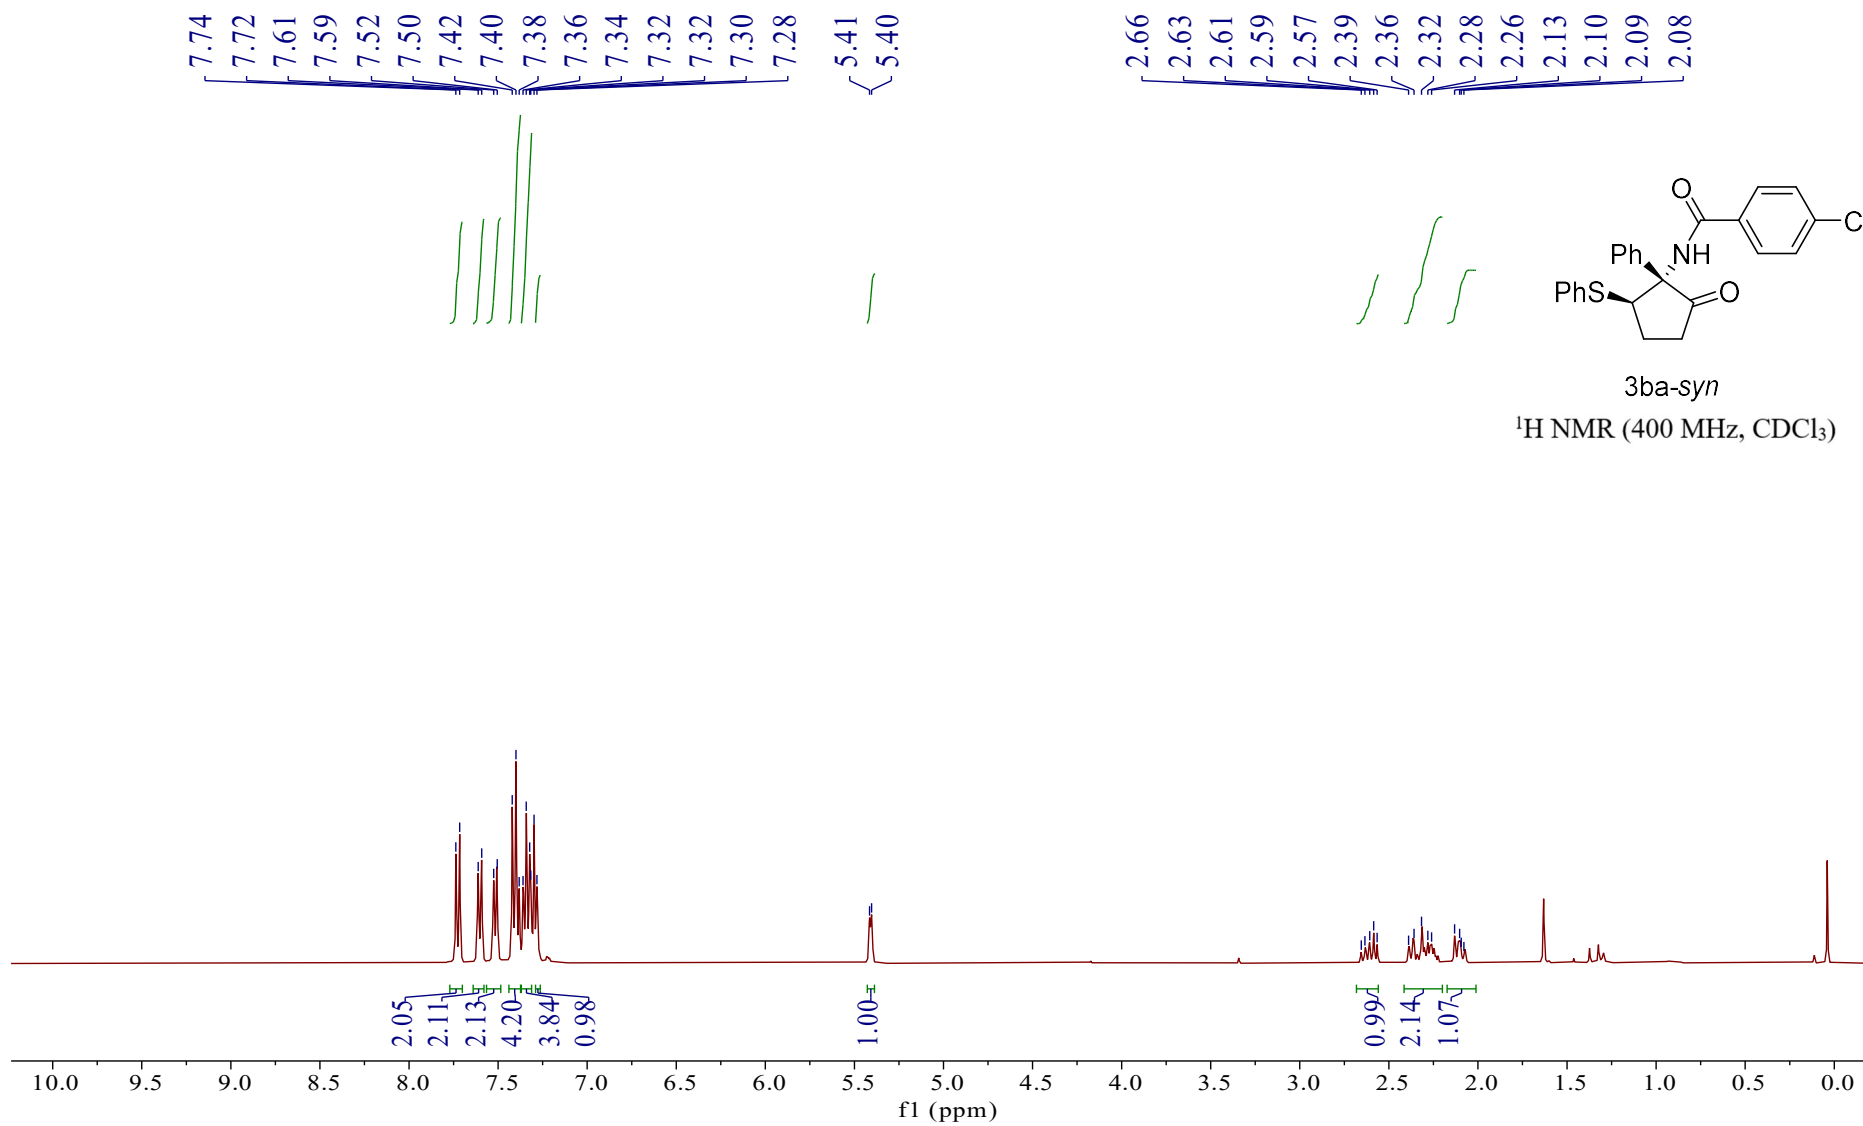

NMR-128

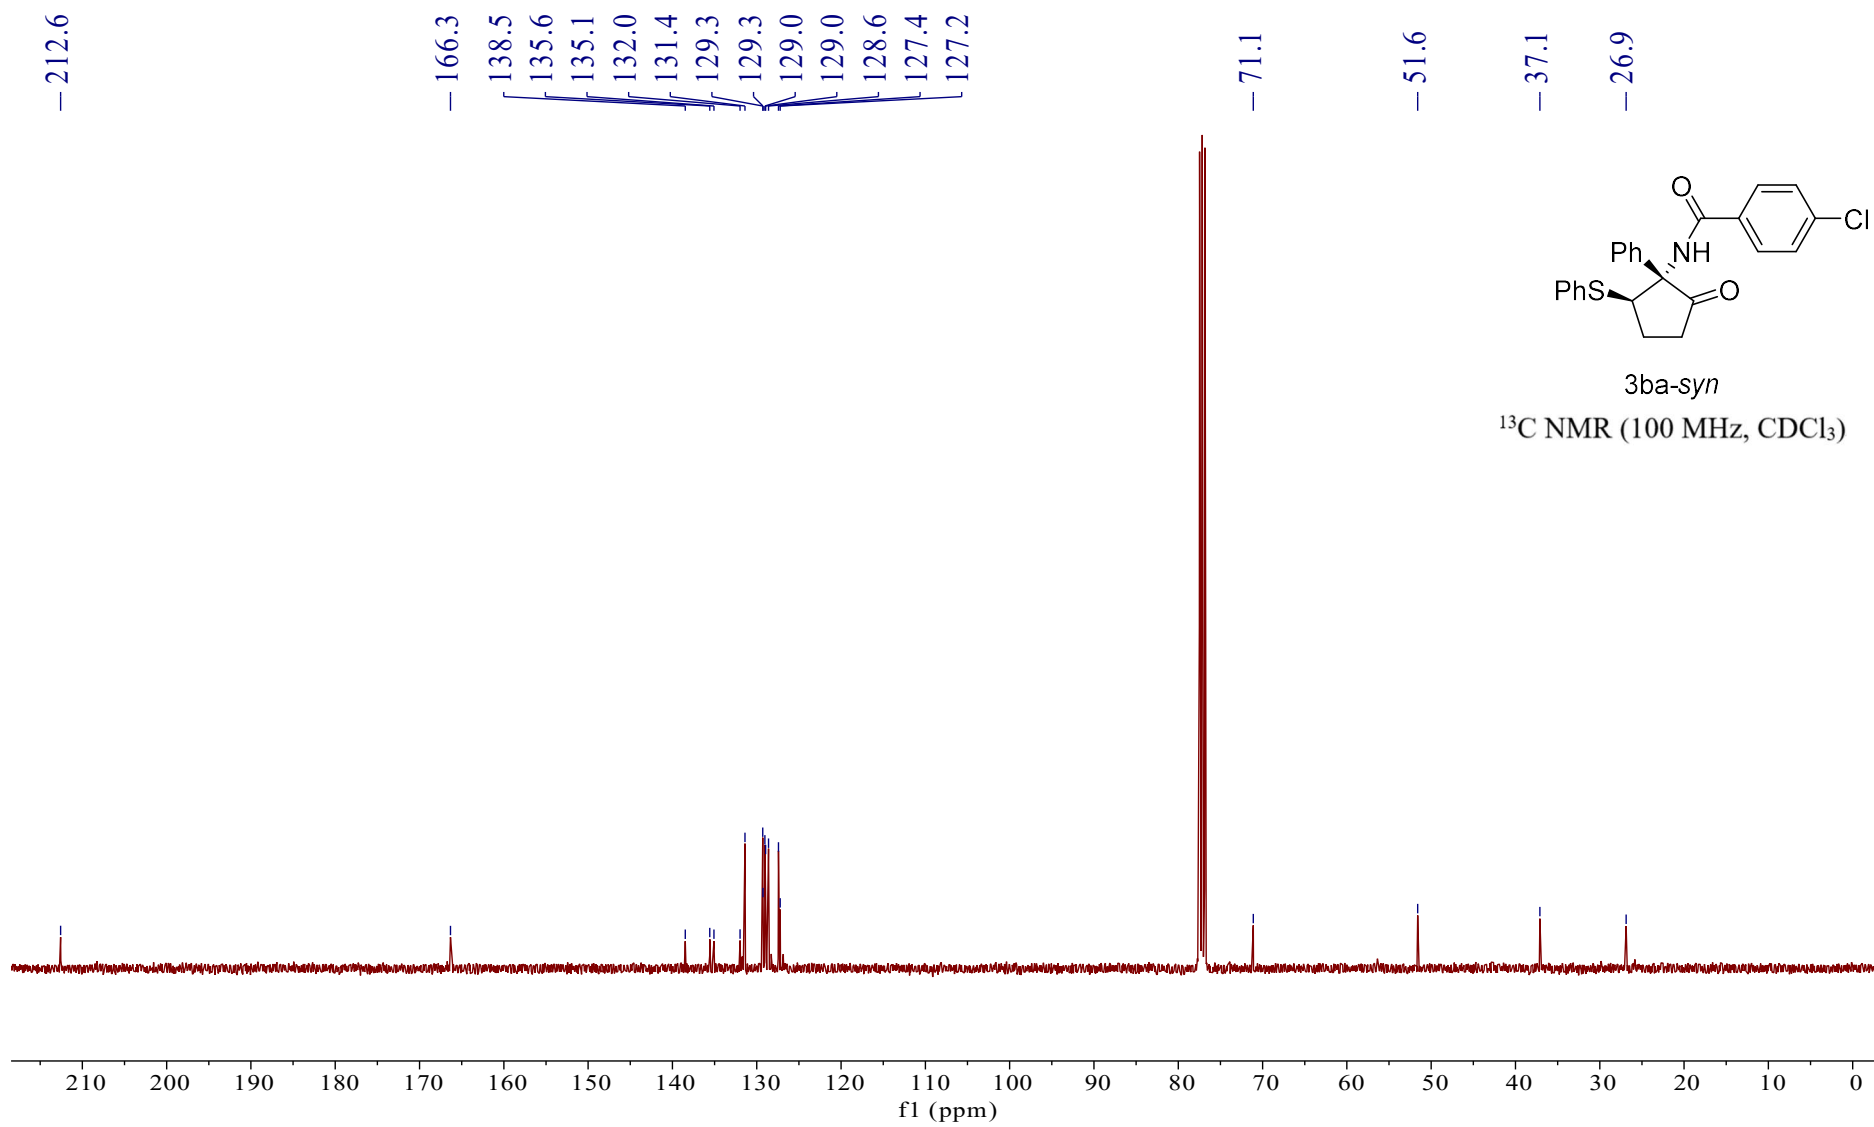

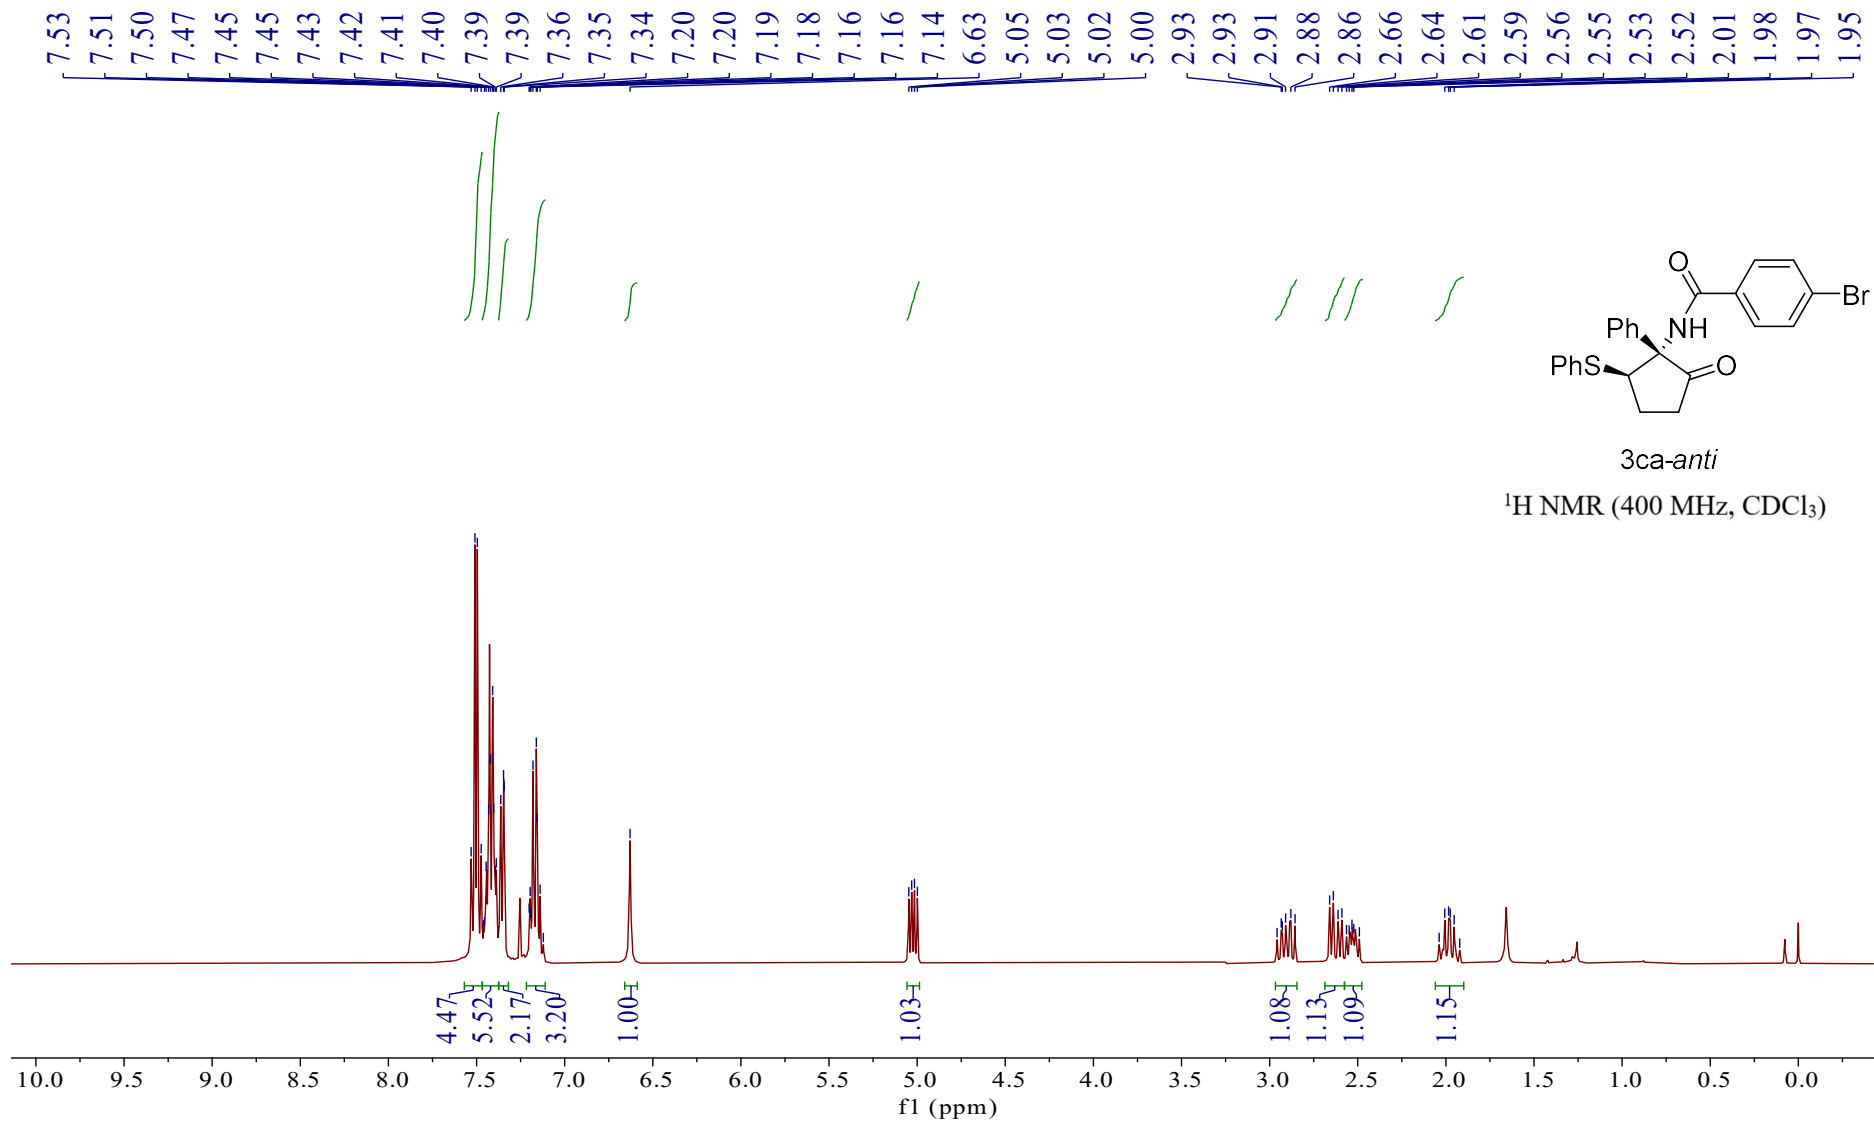

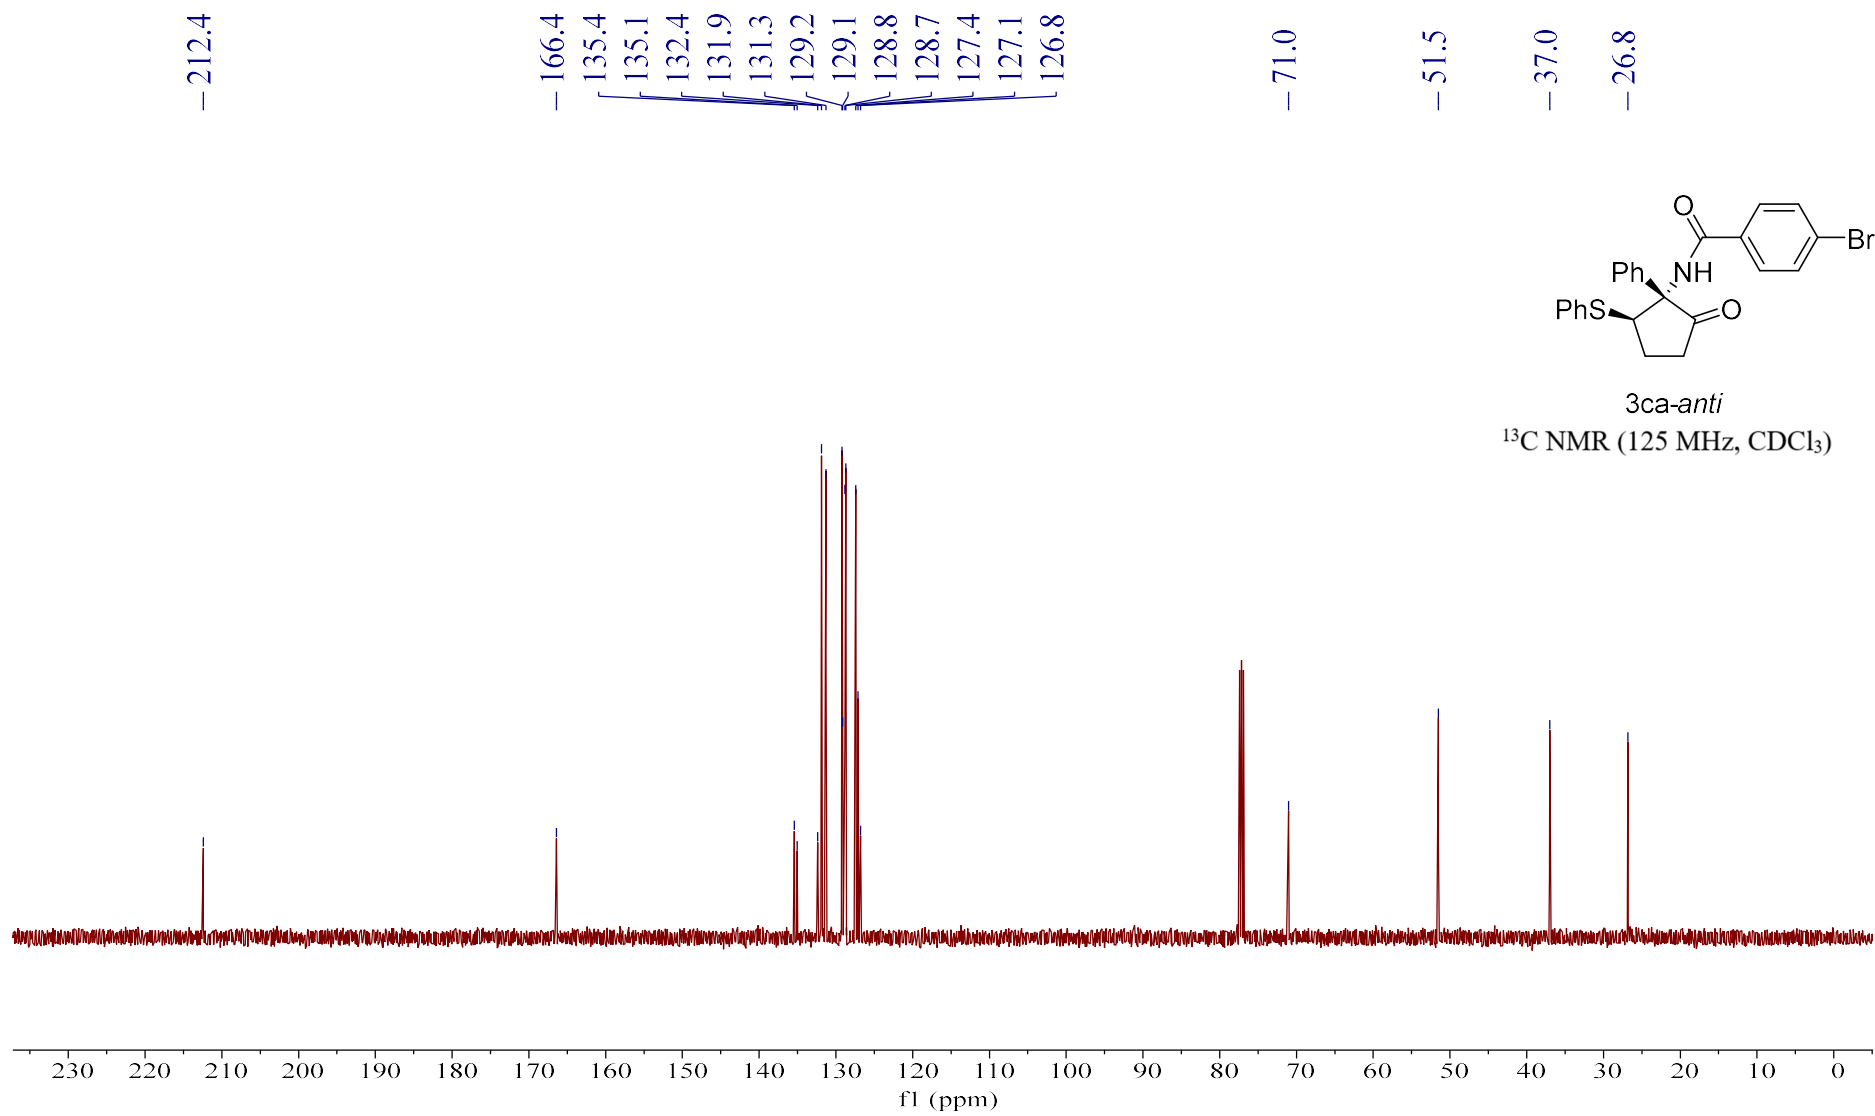

NMR-131

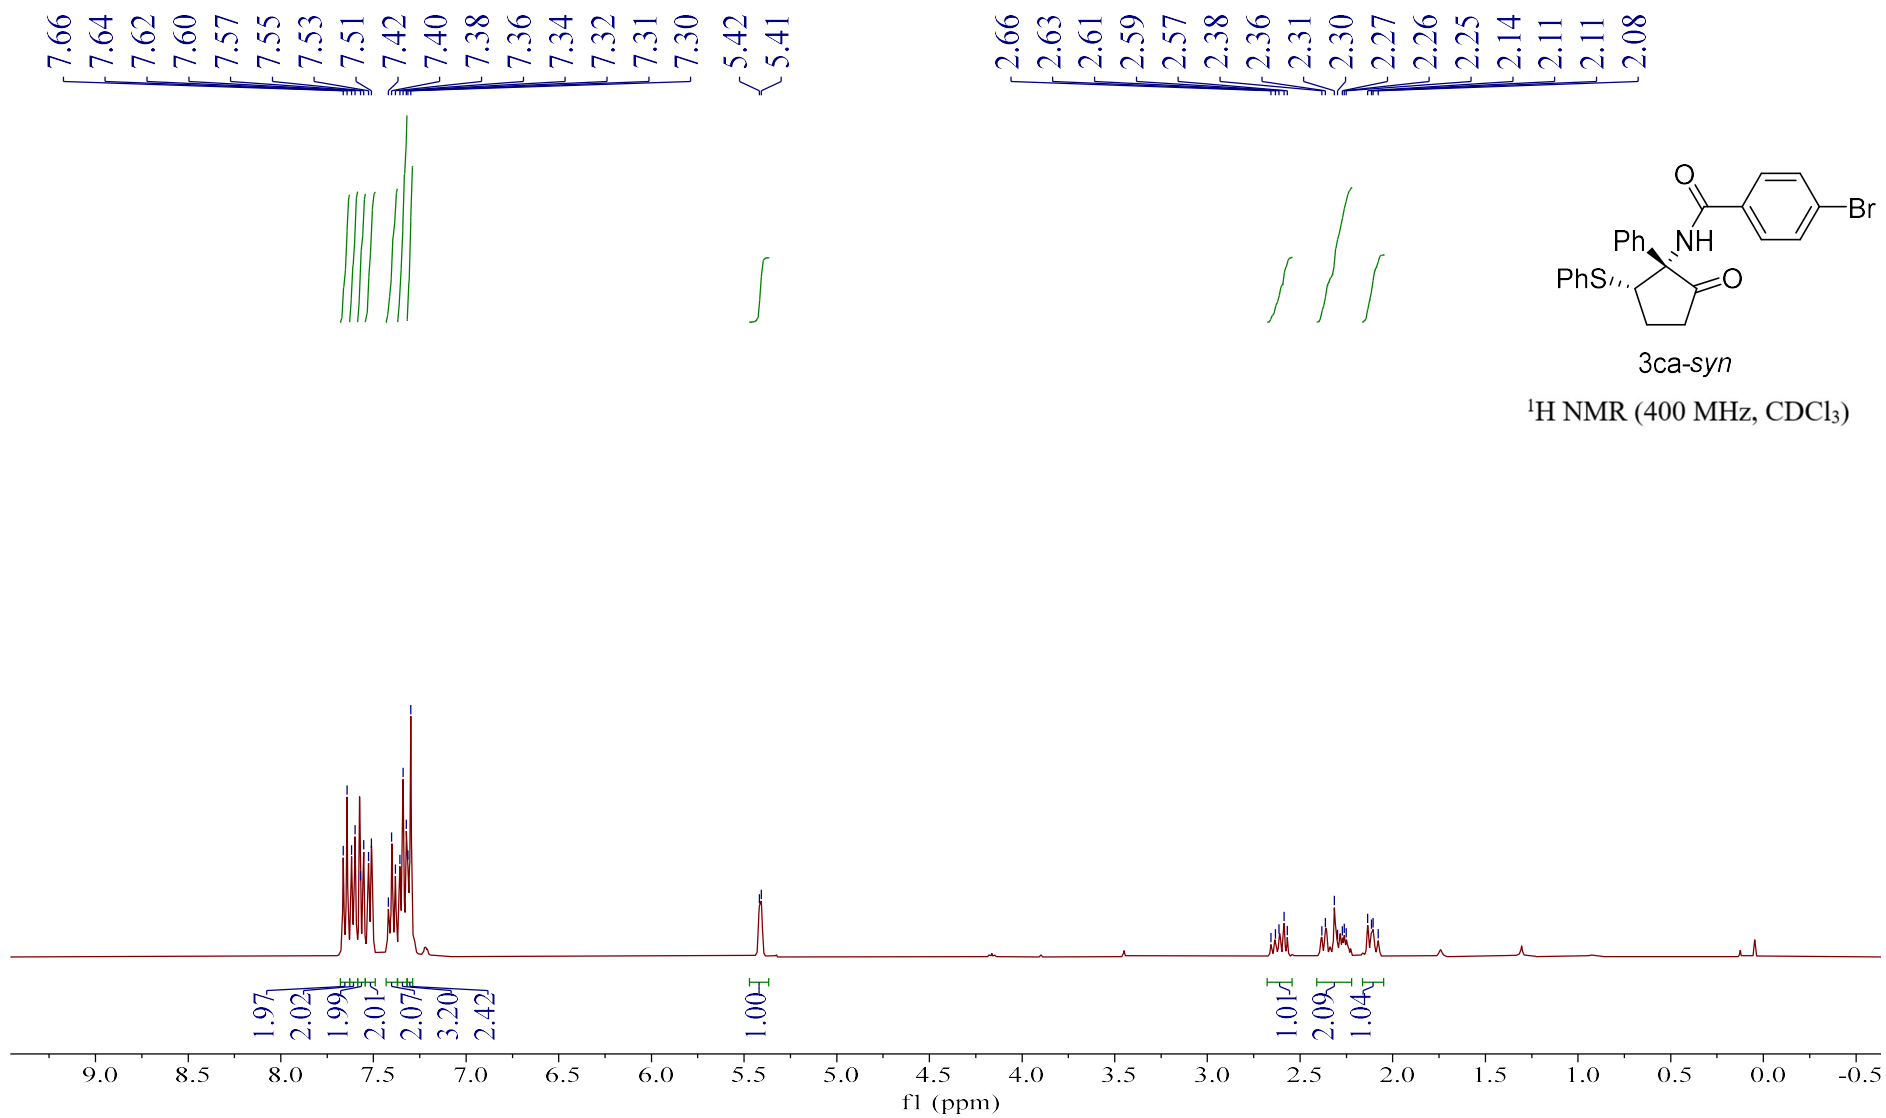



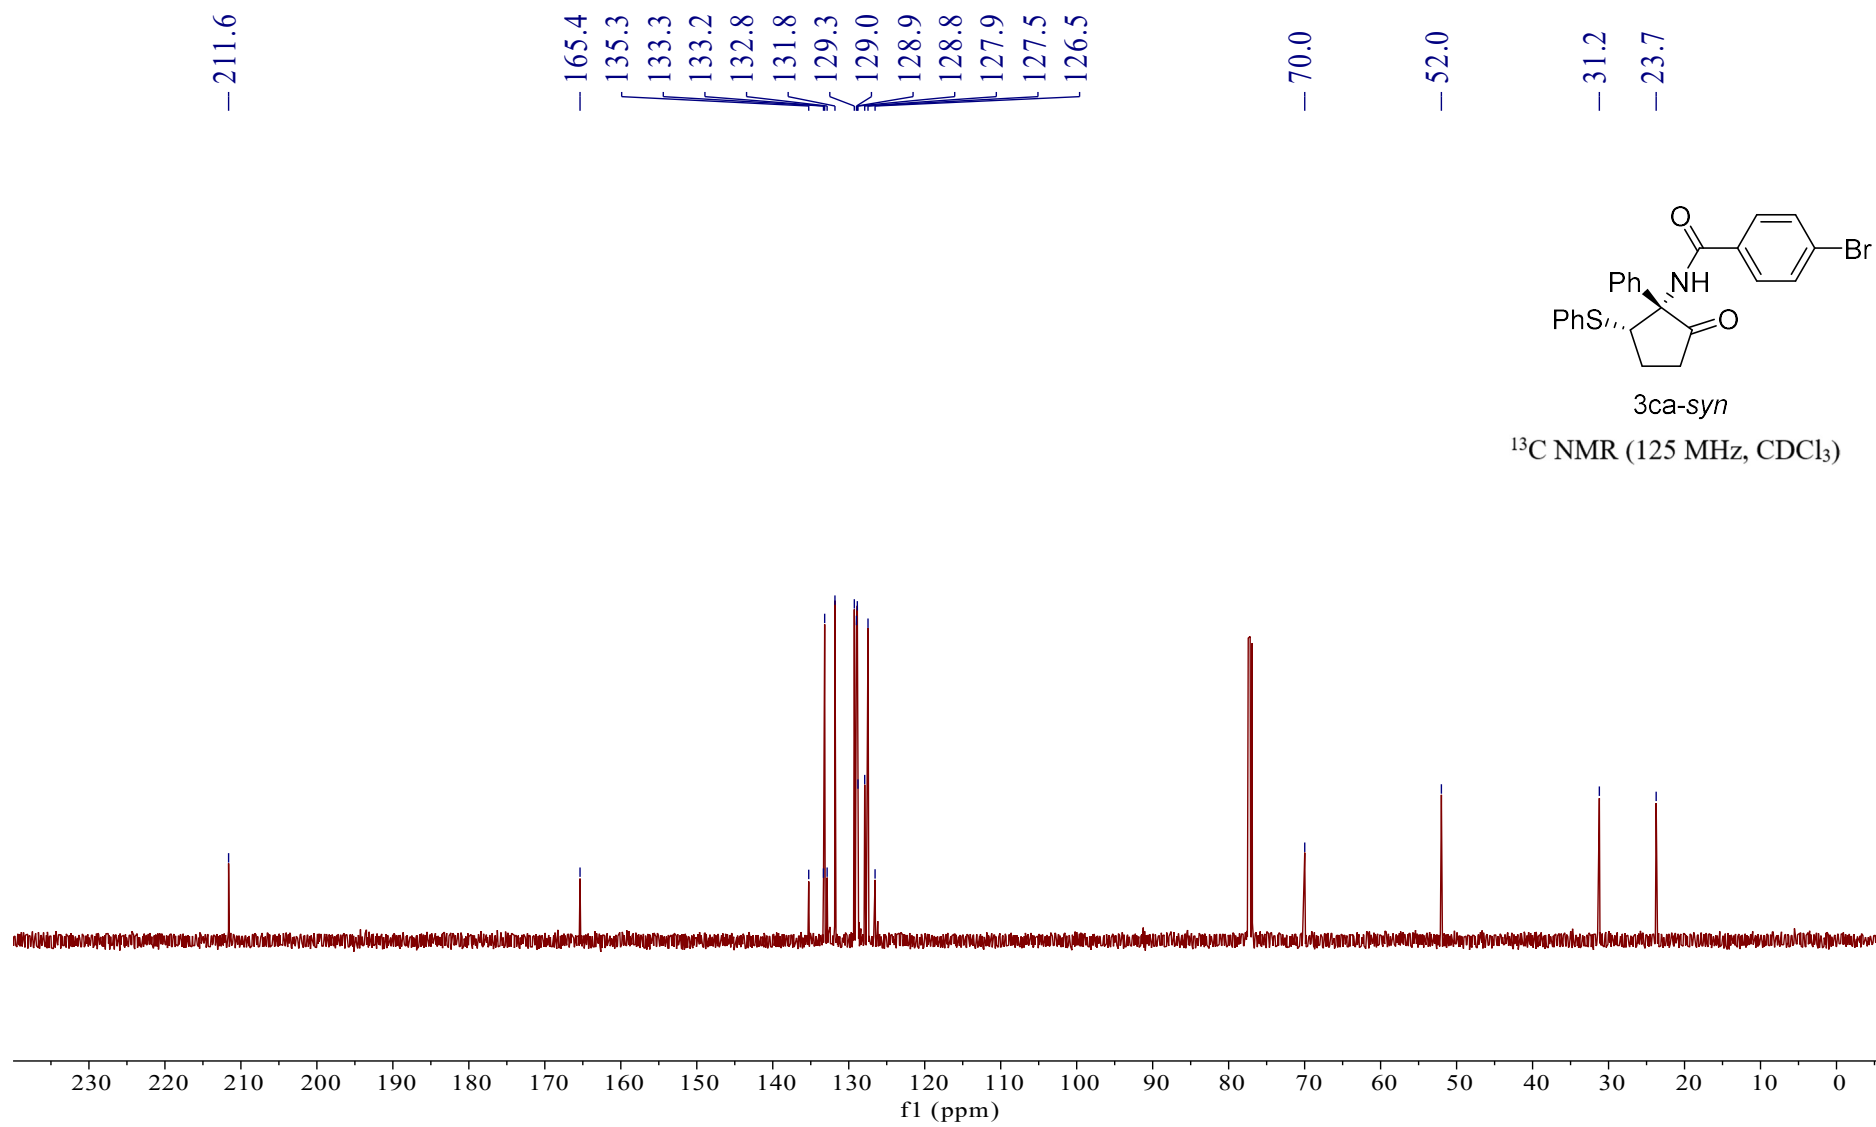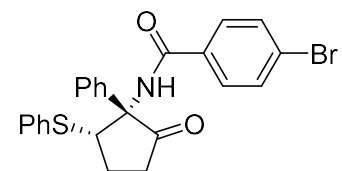

3ca-syn

<sup>13</sup>C NMR (125 MHz, CDCl<sub>3</sub>)

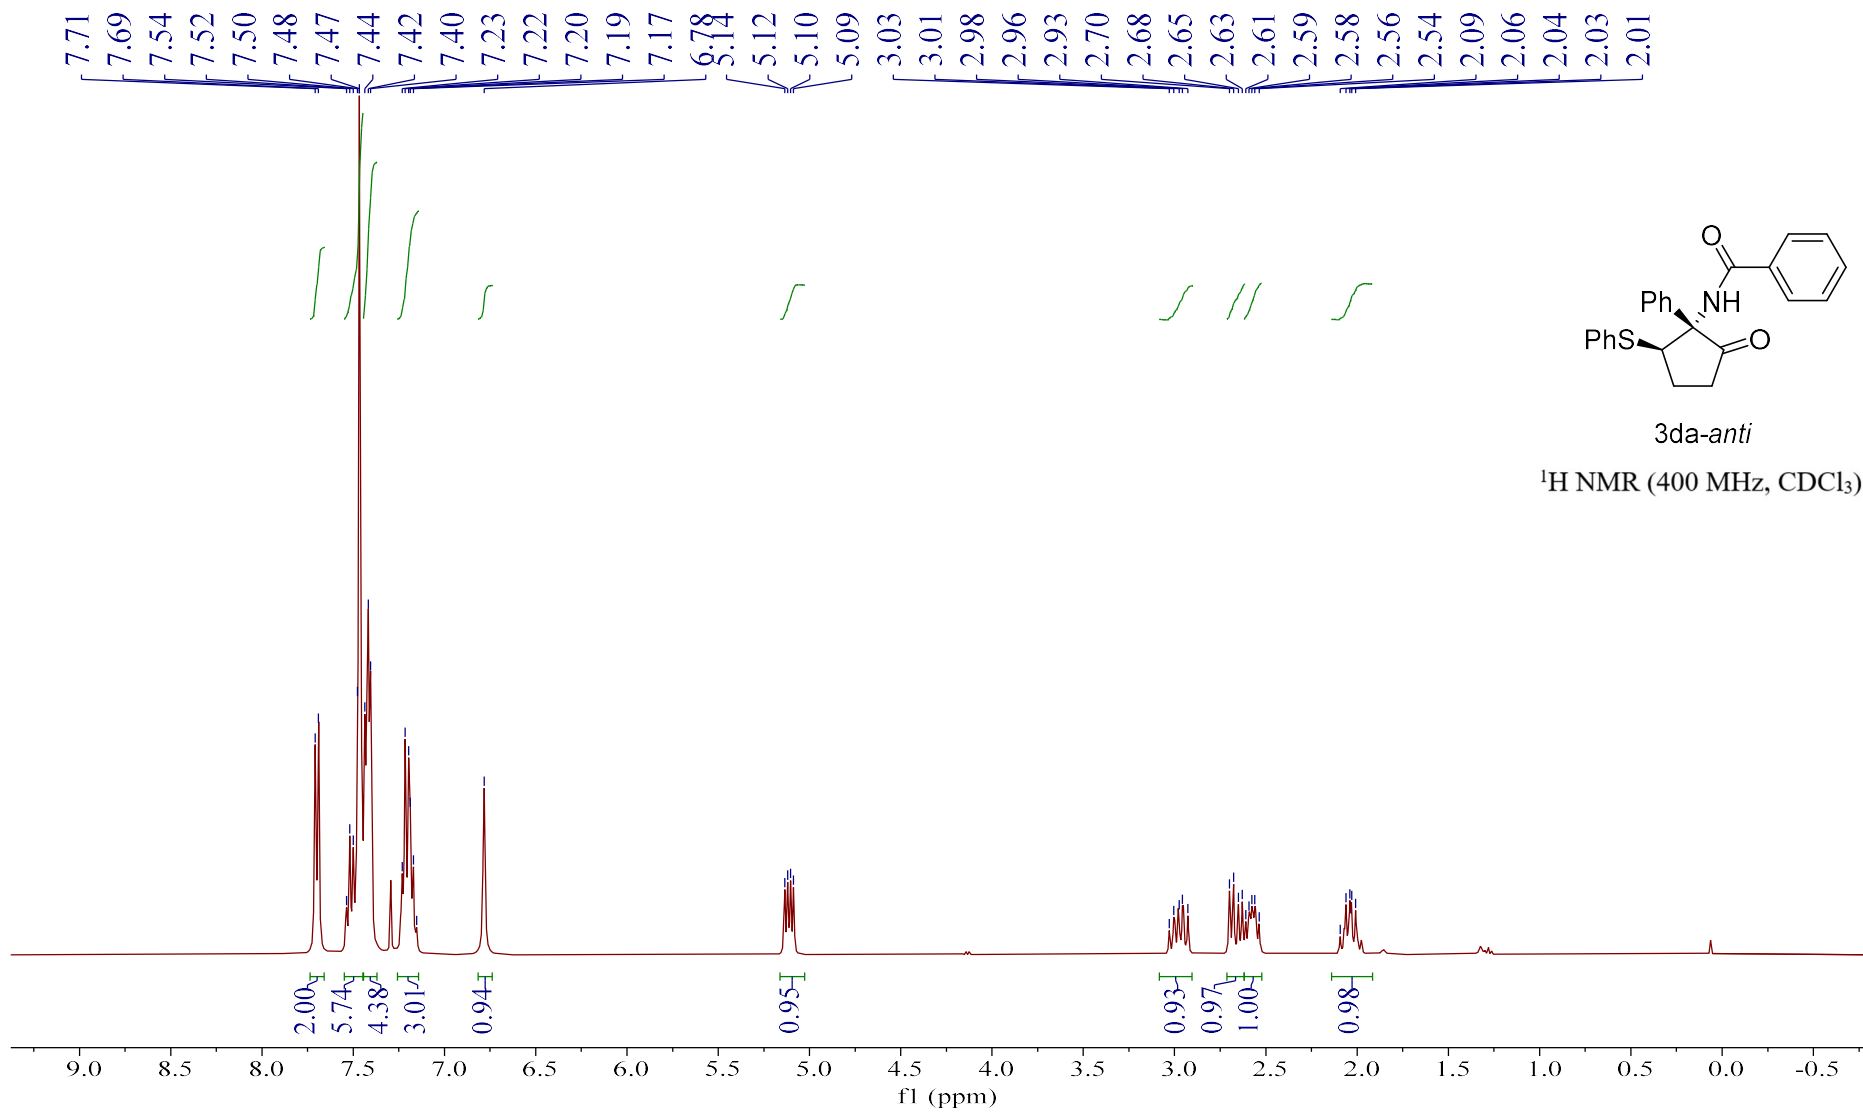

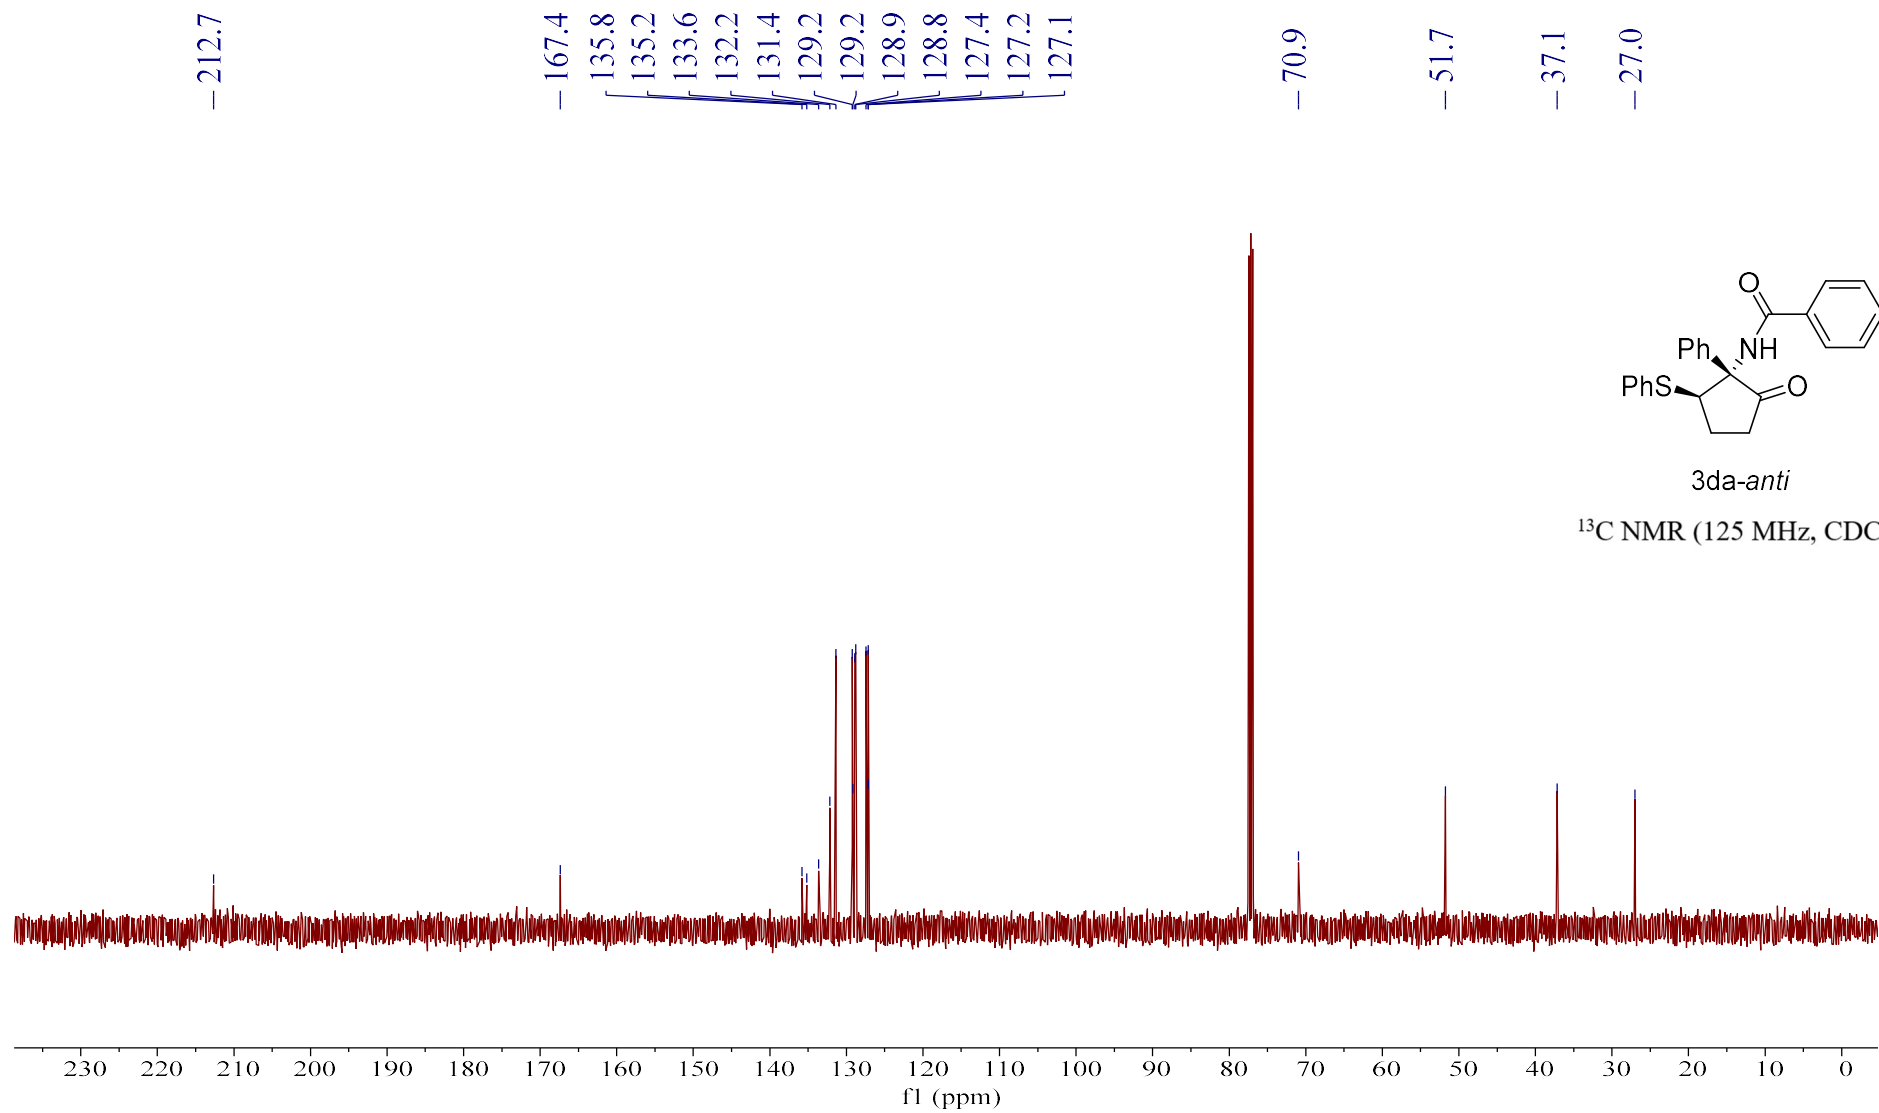

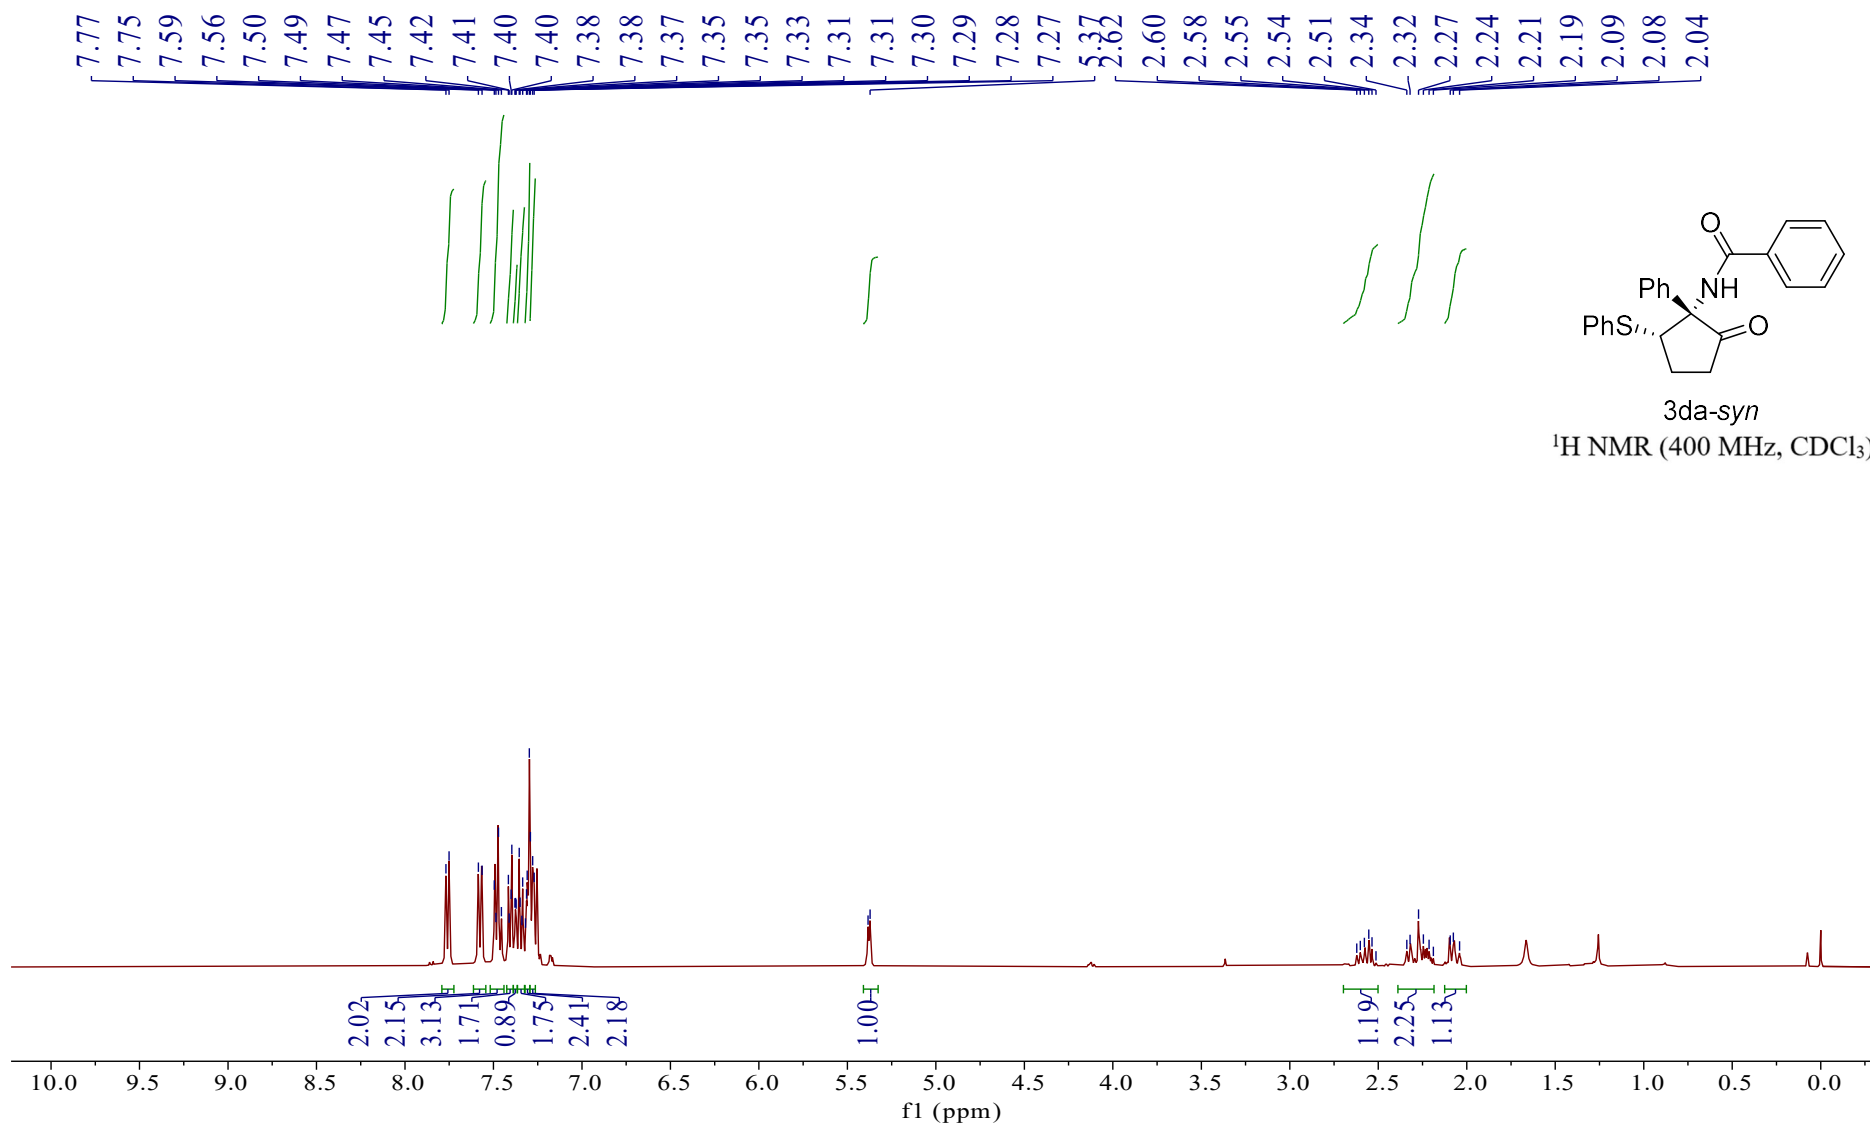

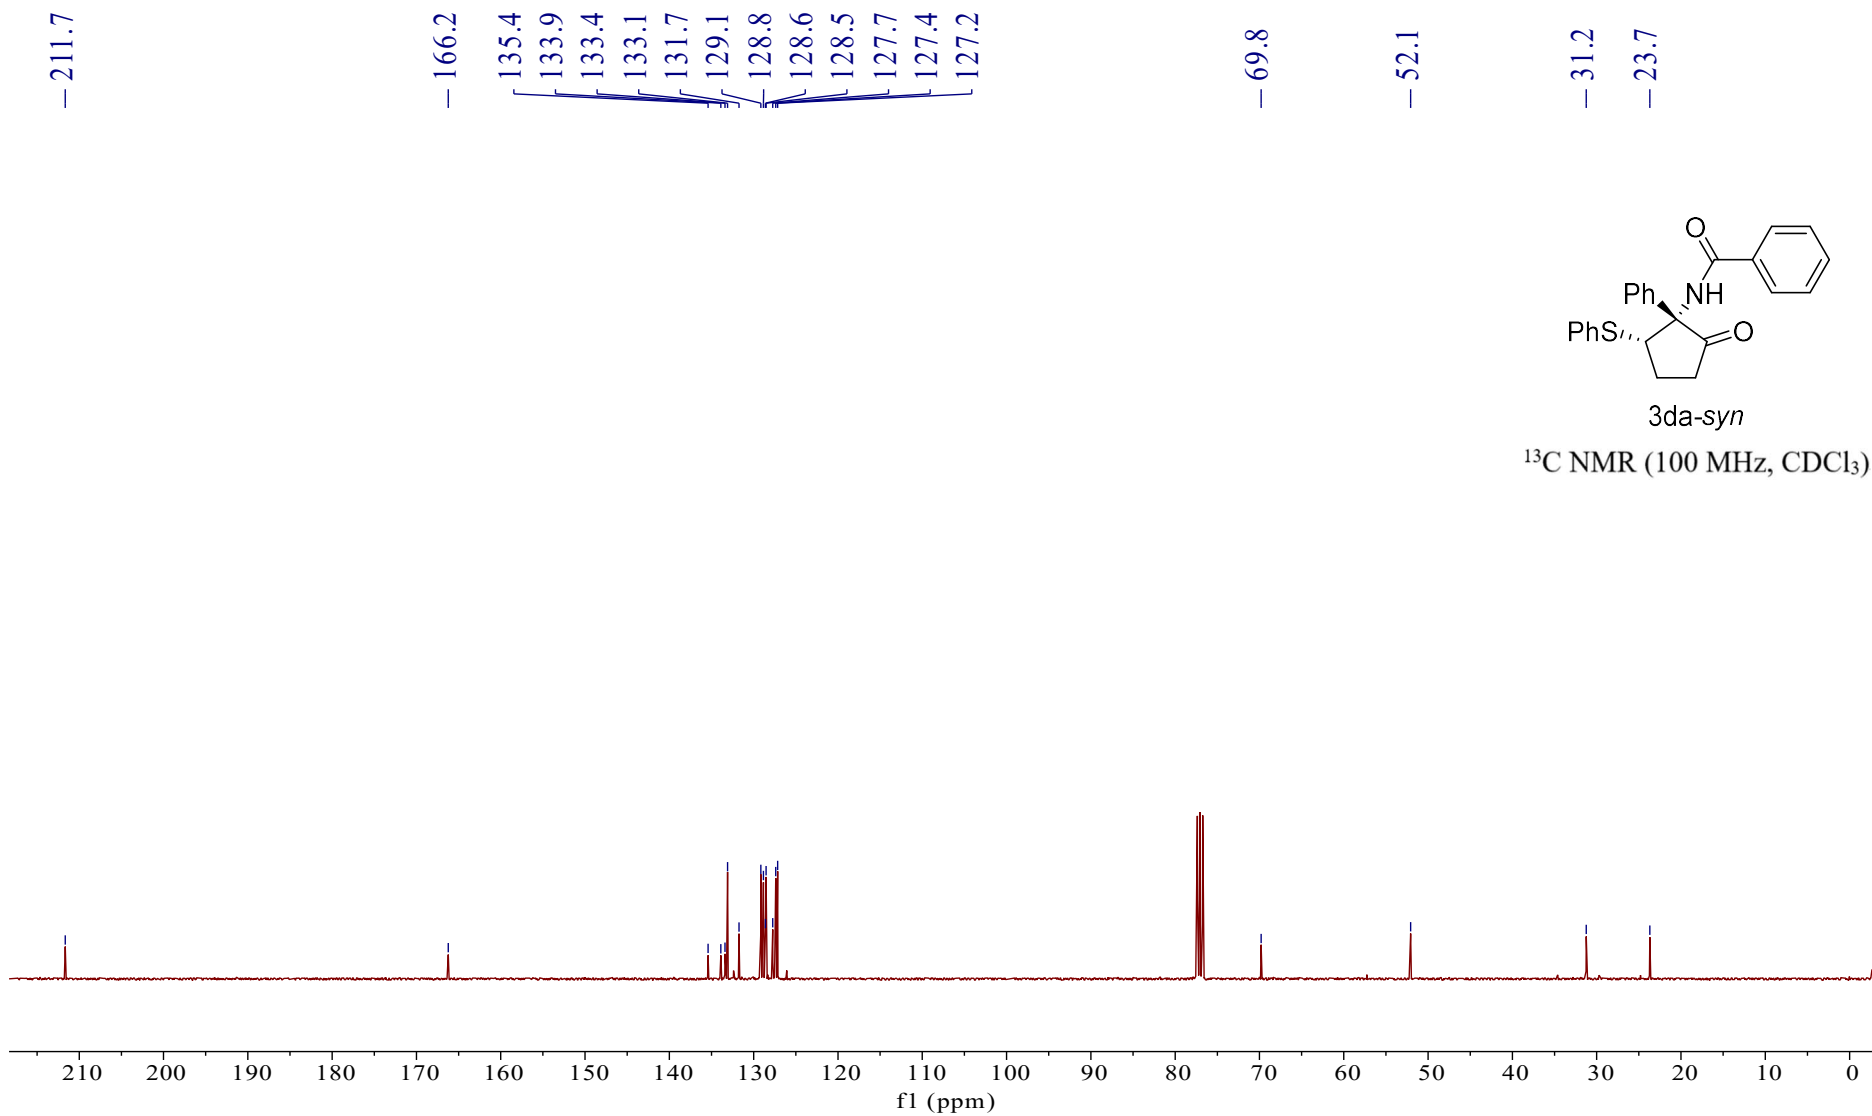

NMR-137

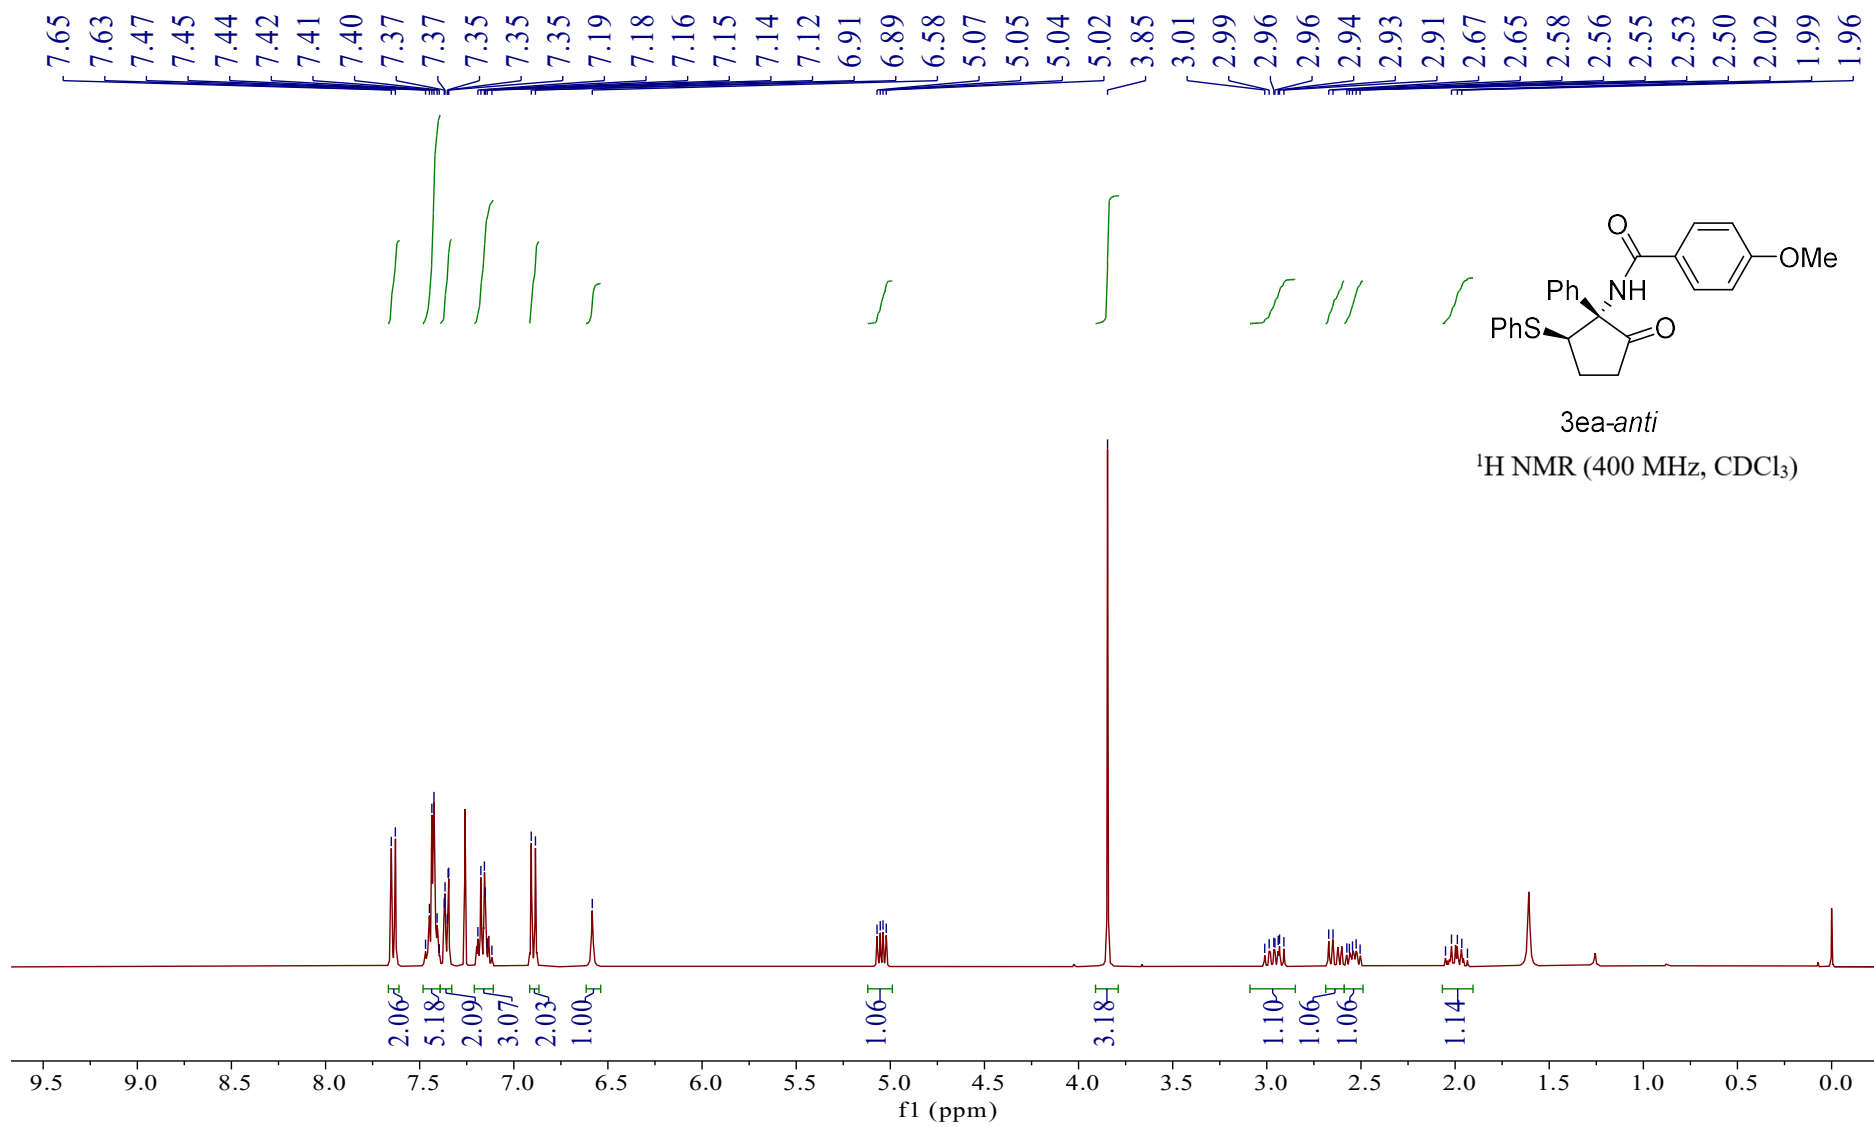

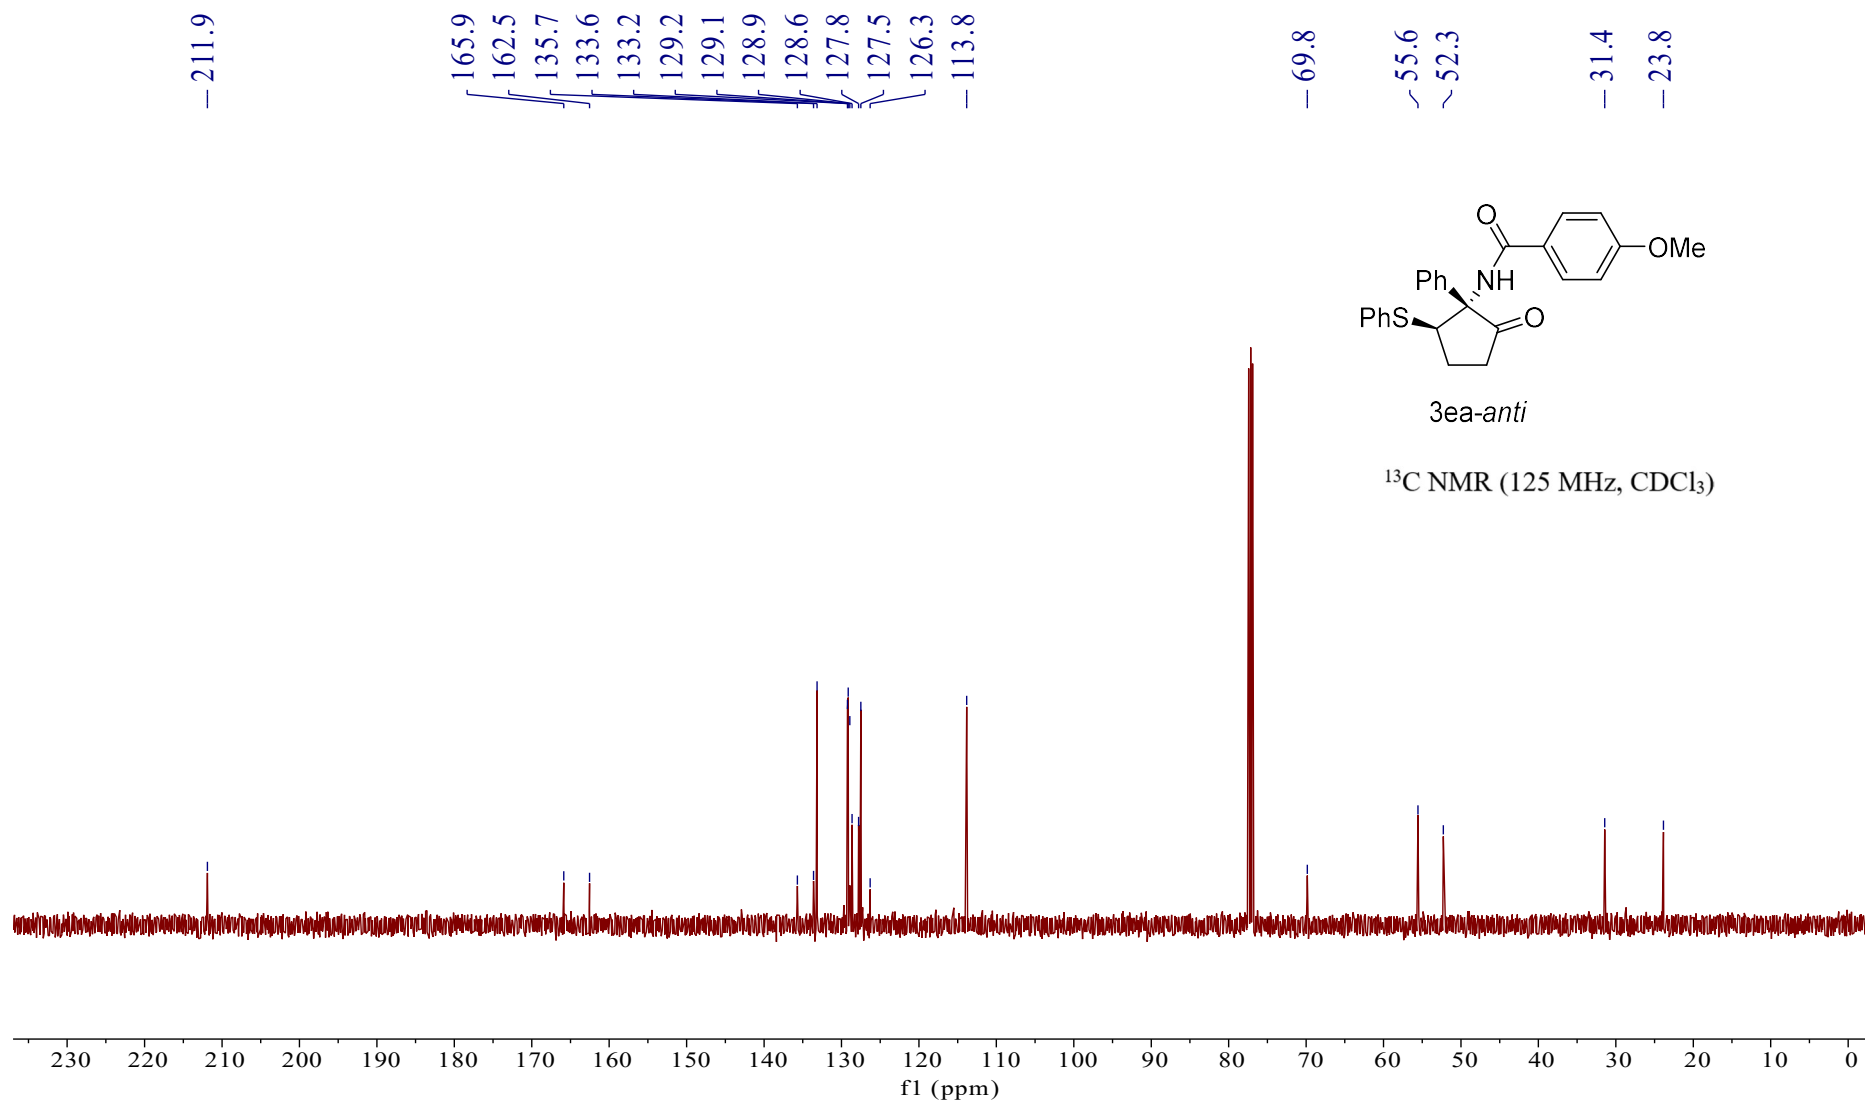

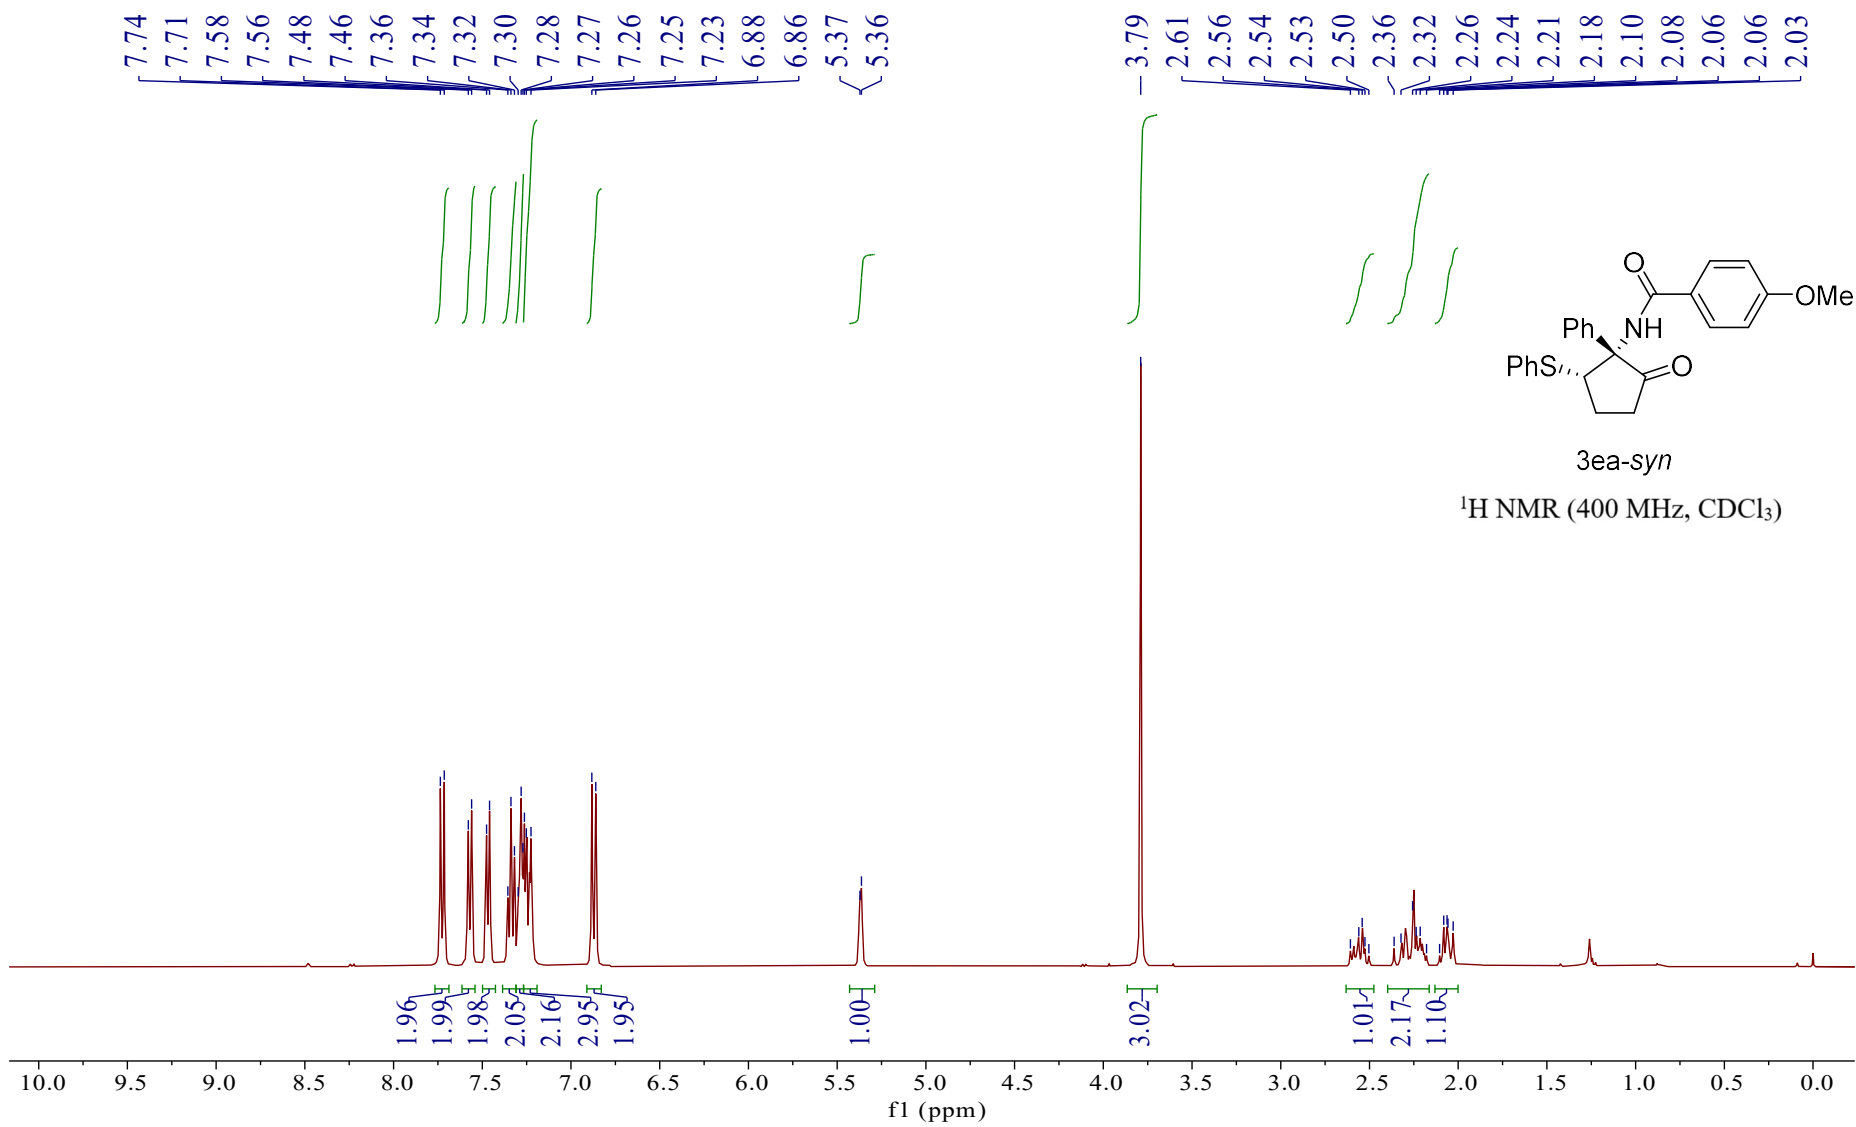



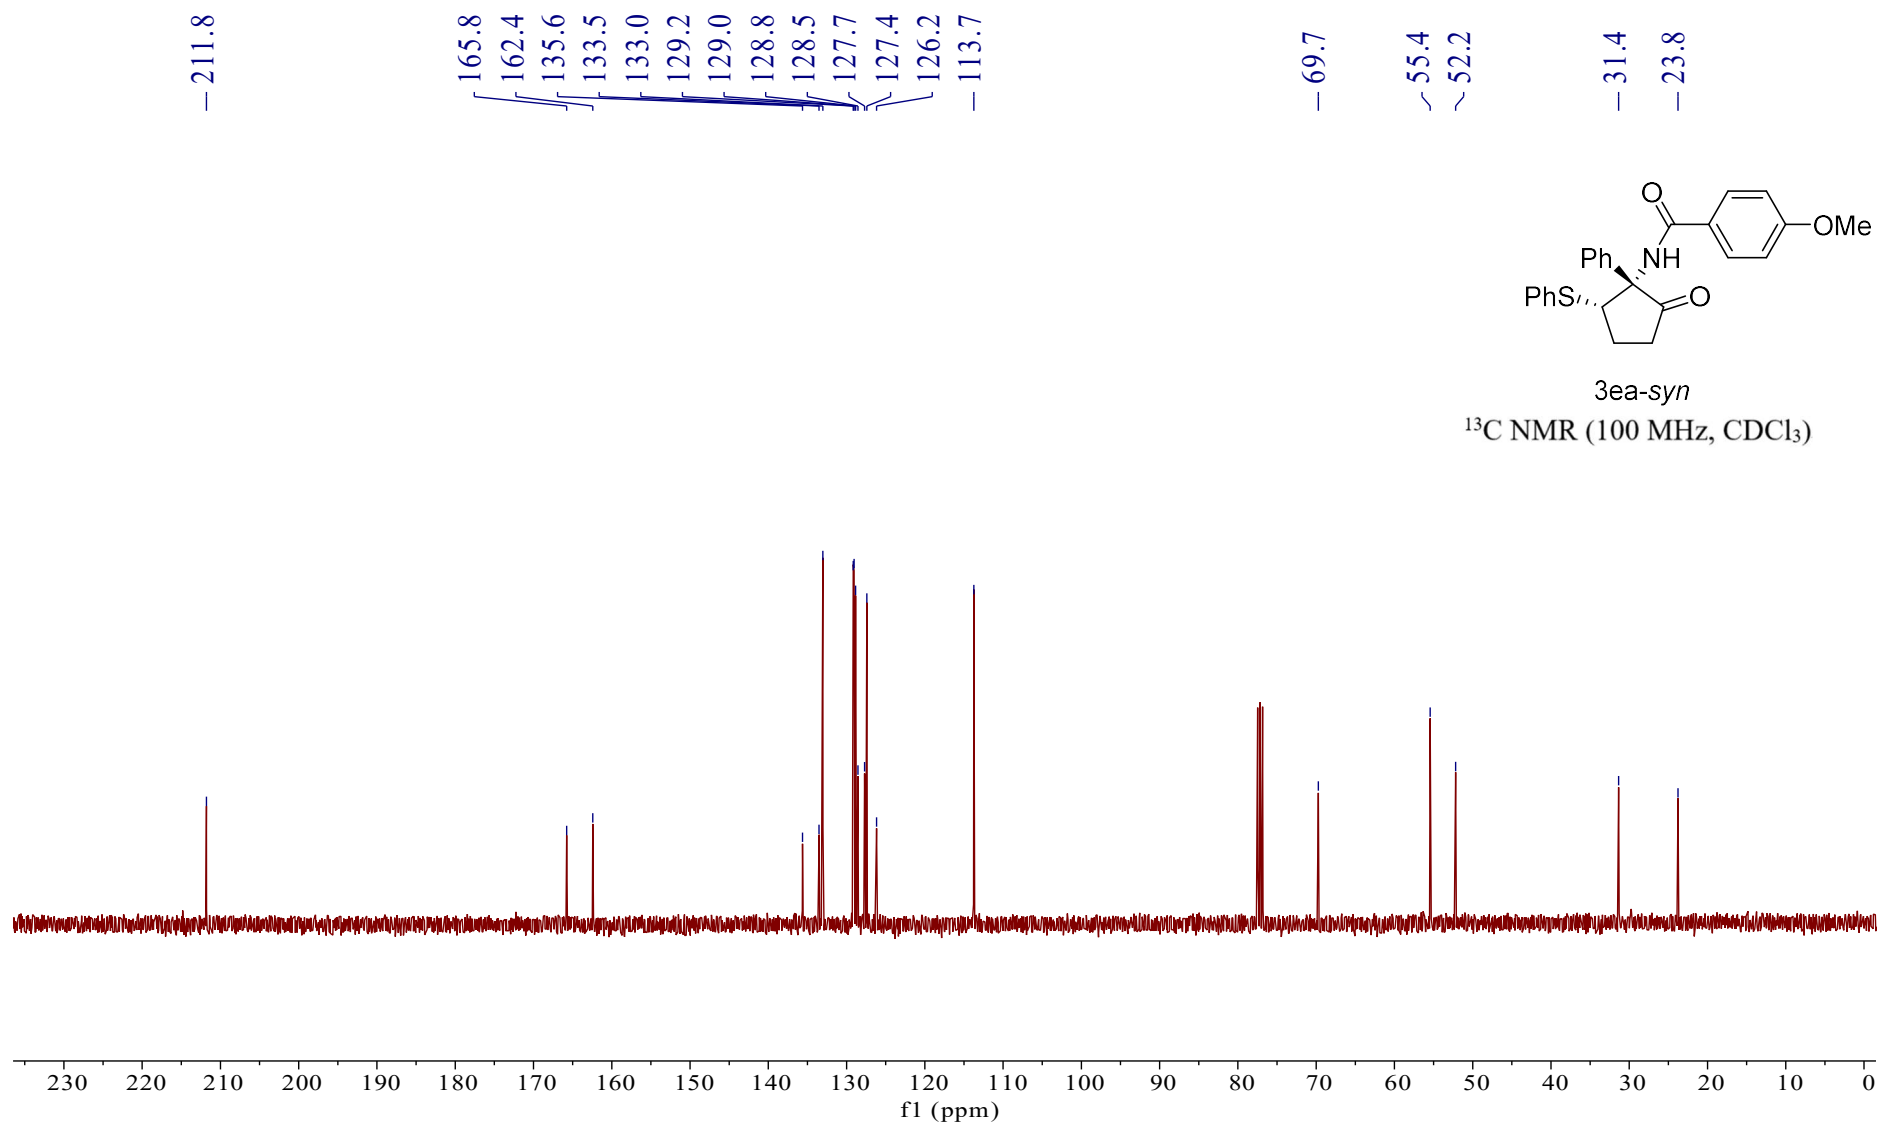

NMR-141

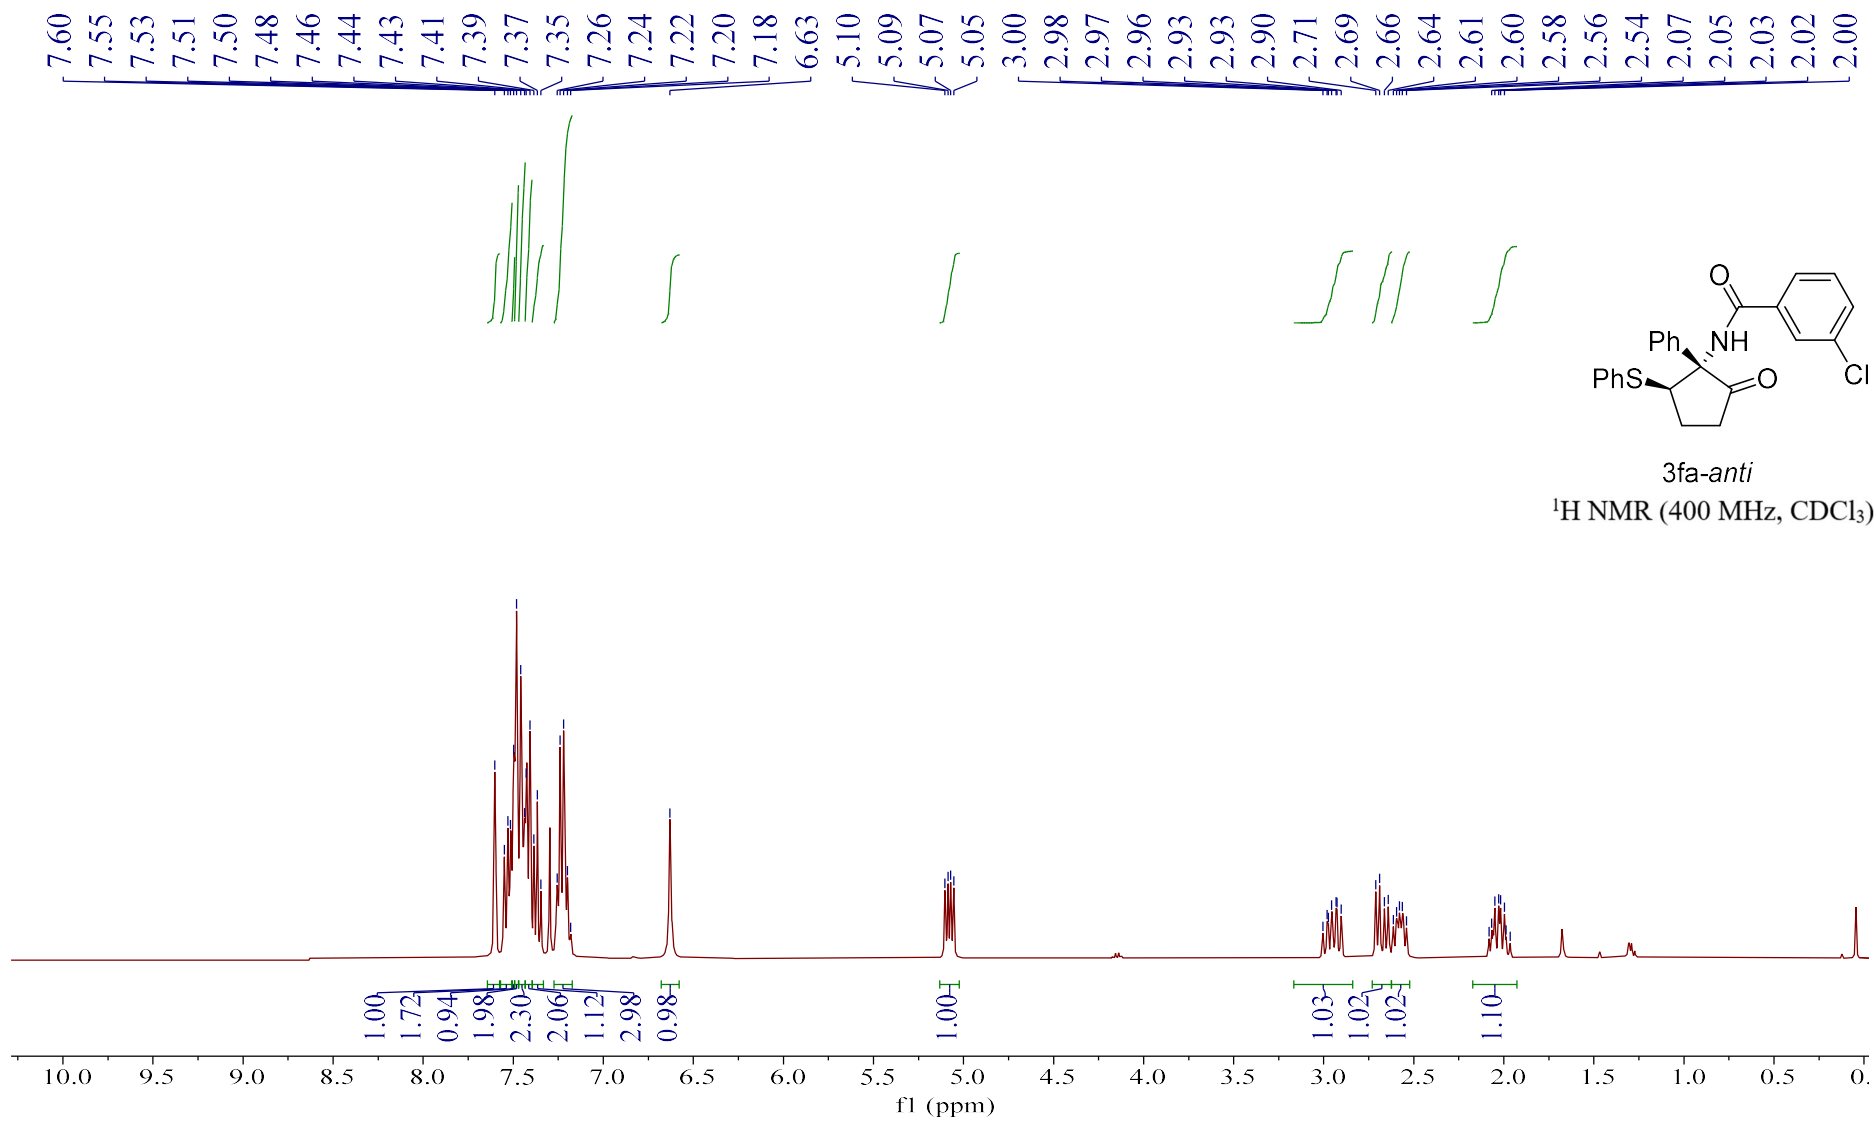

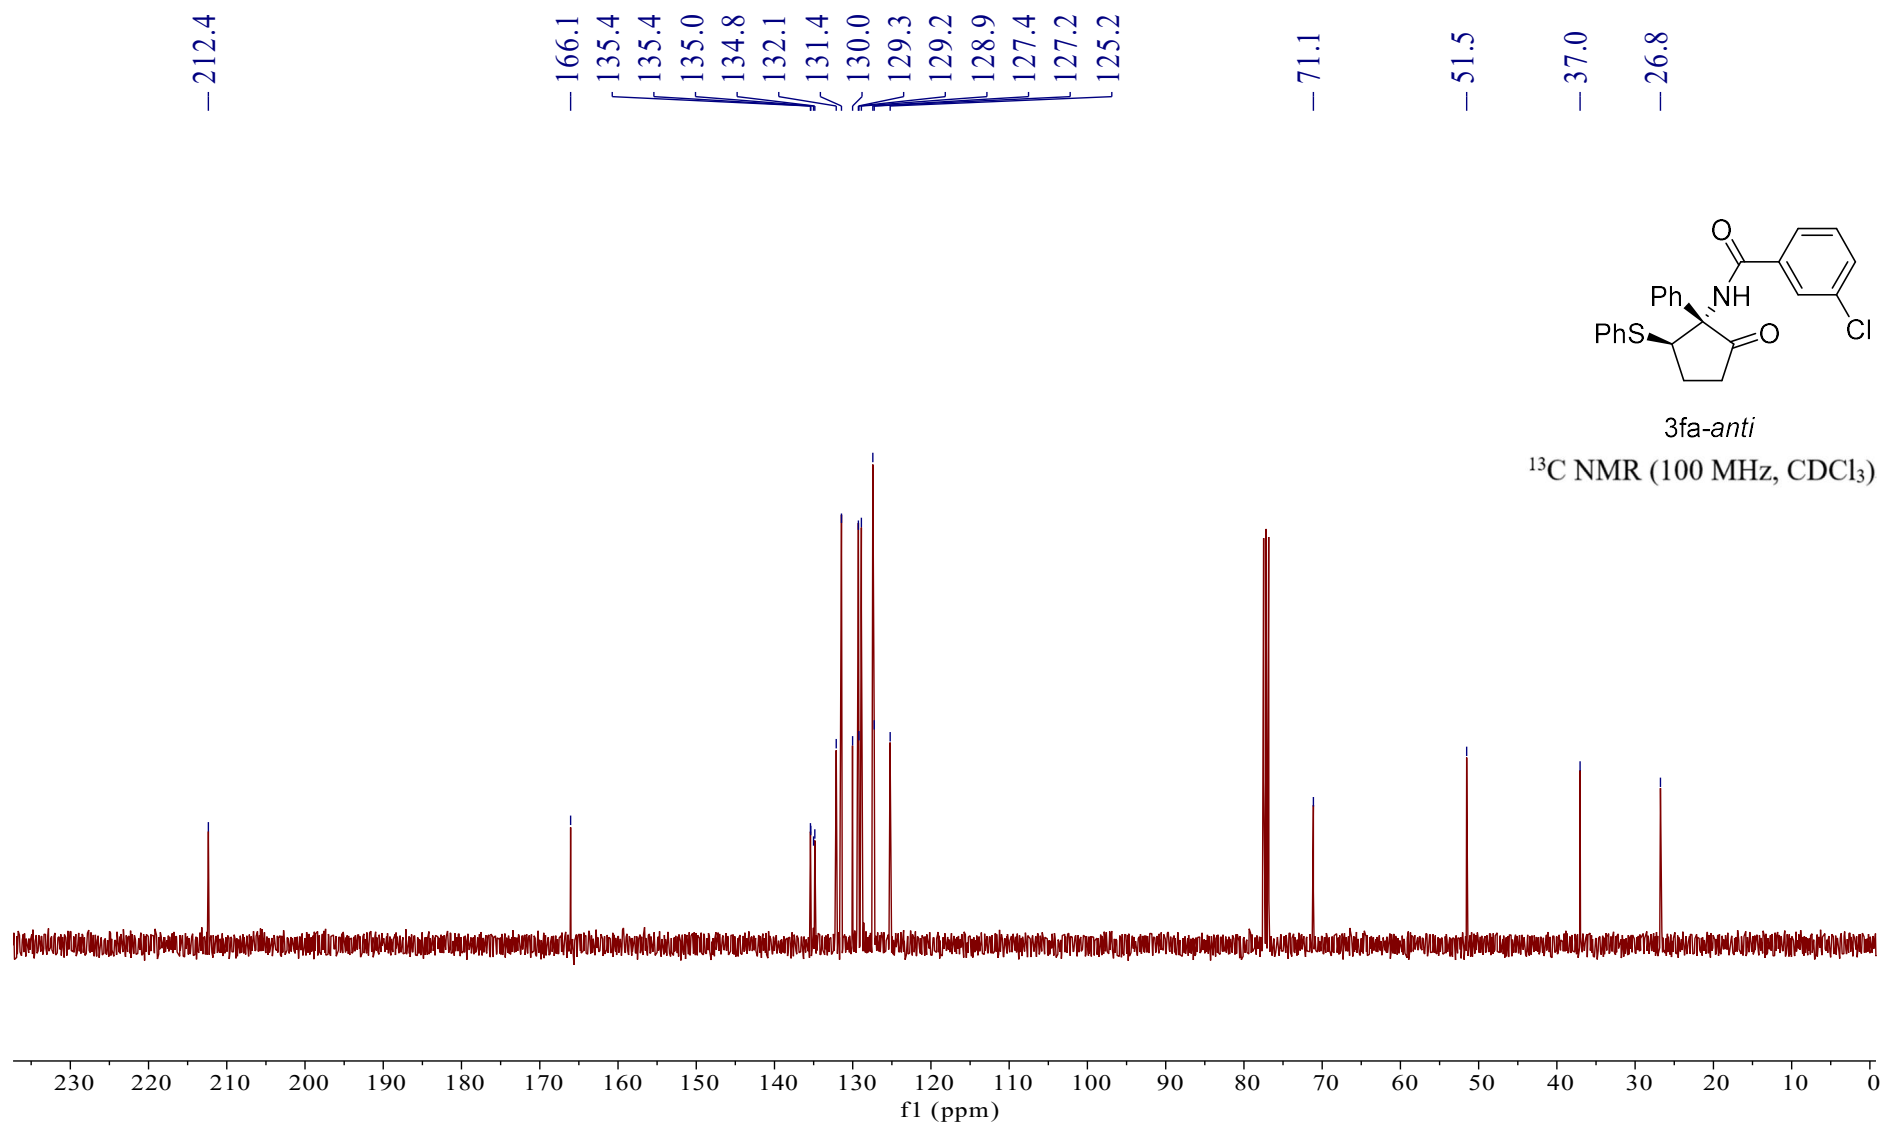

NMR-143

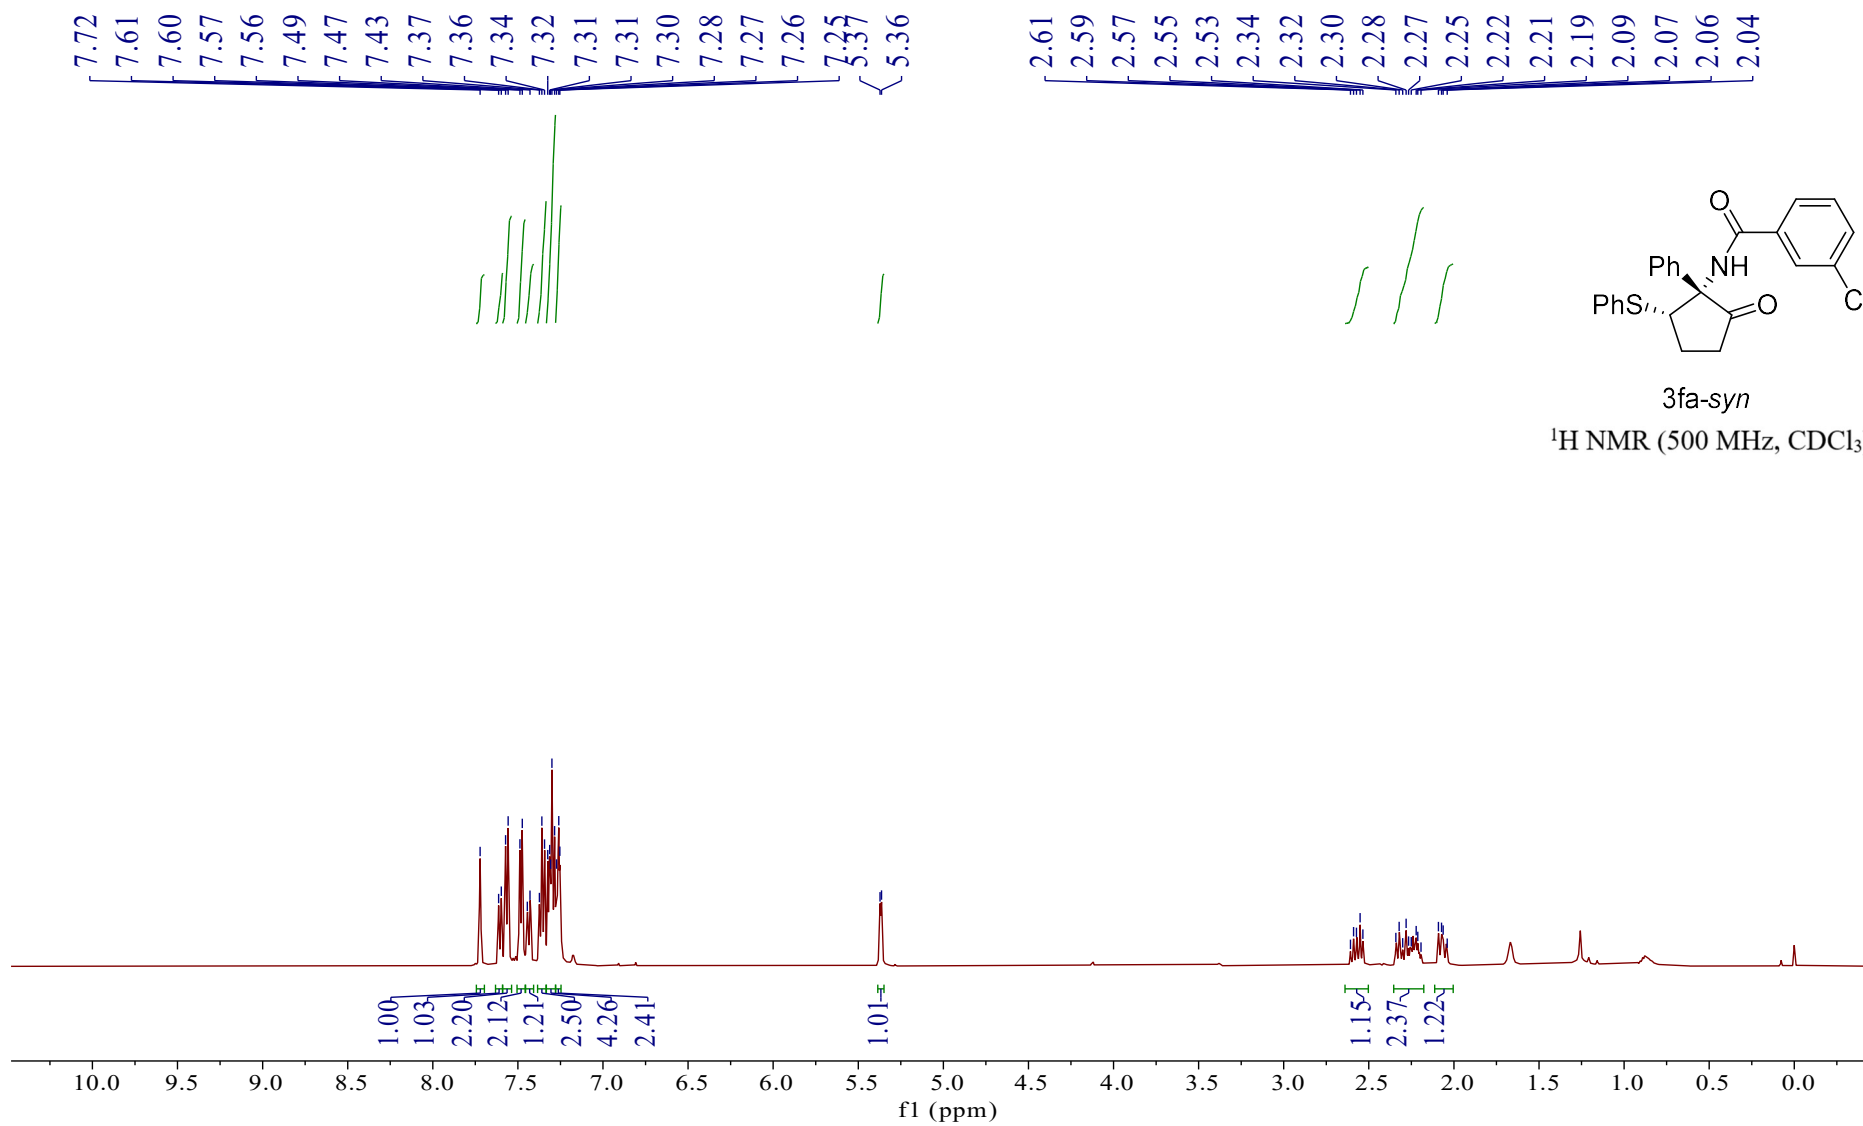

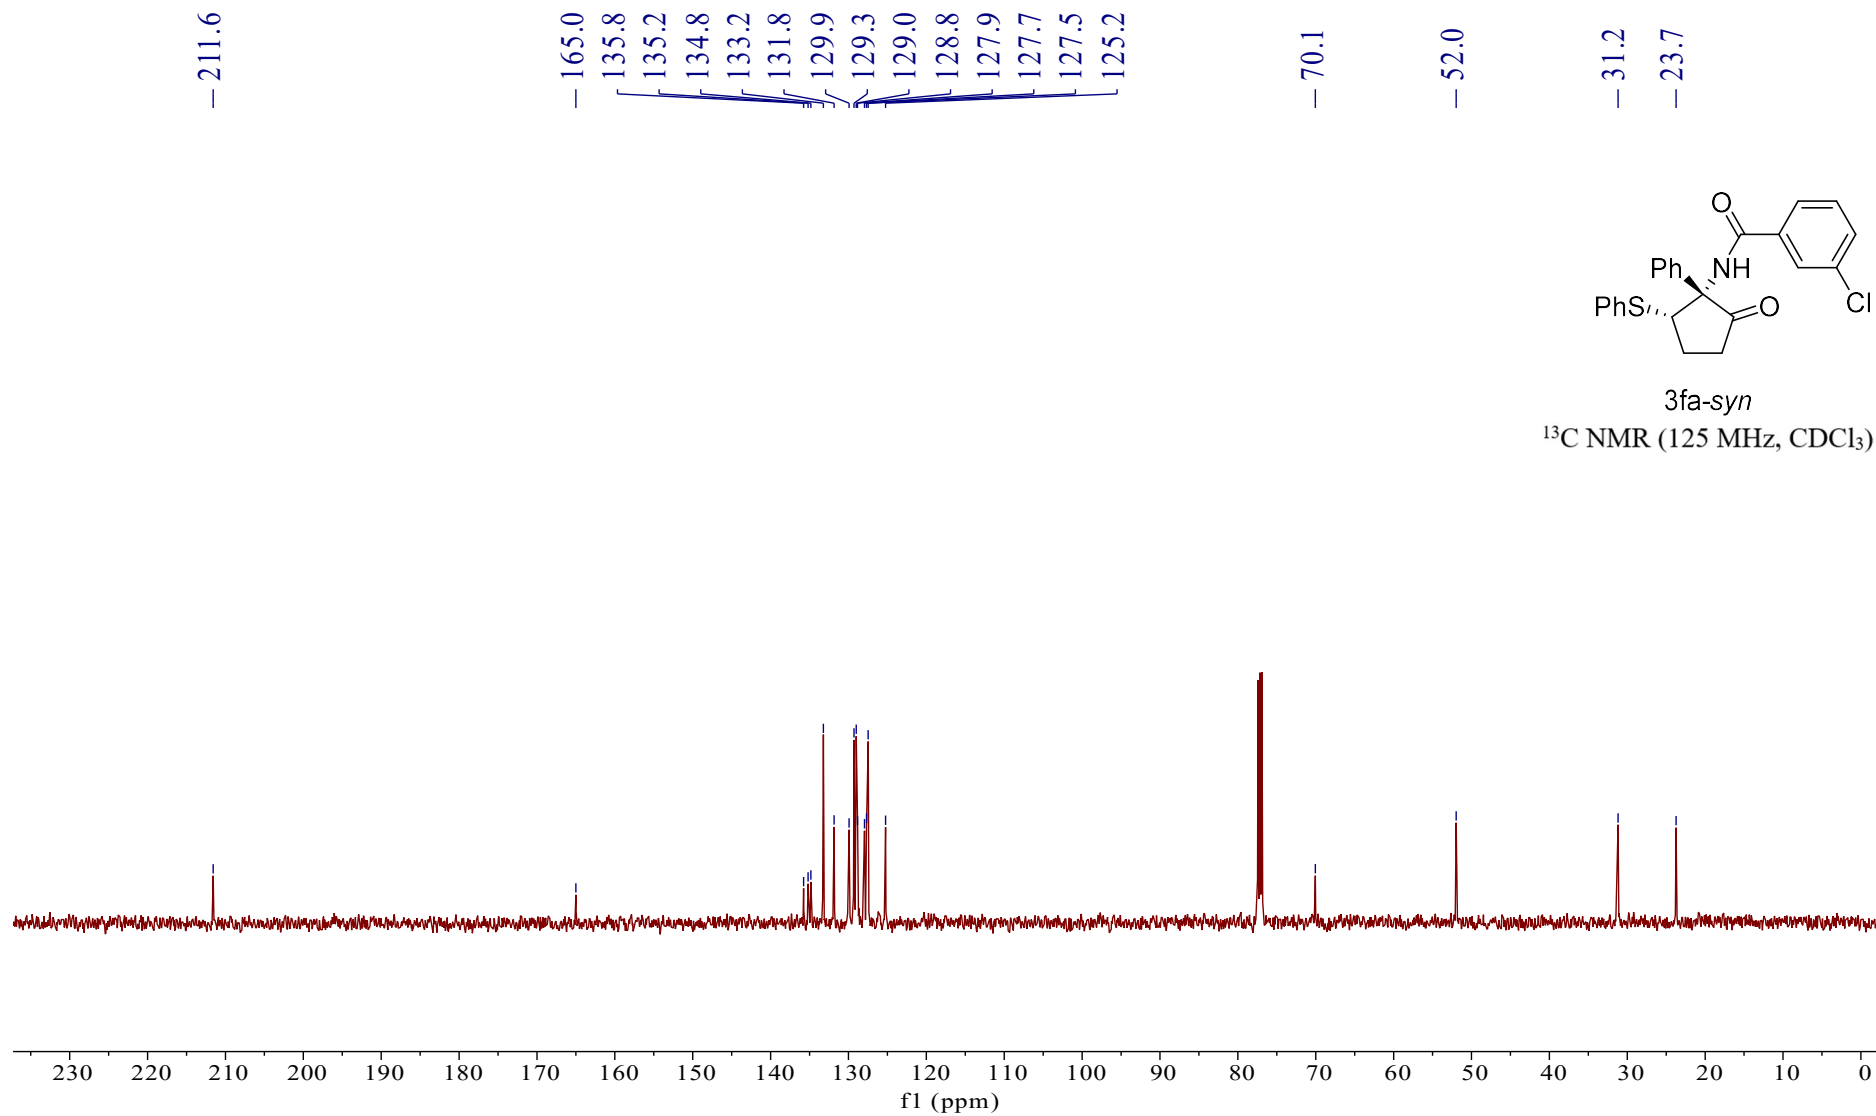

NMR-145

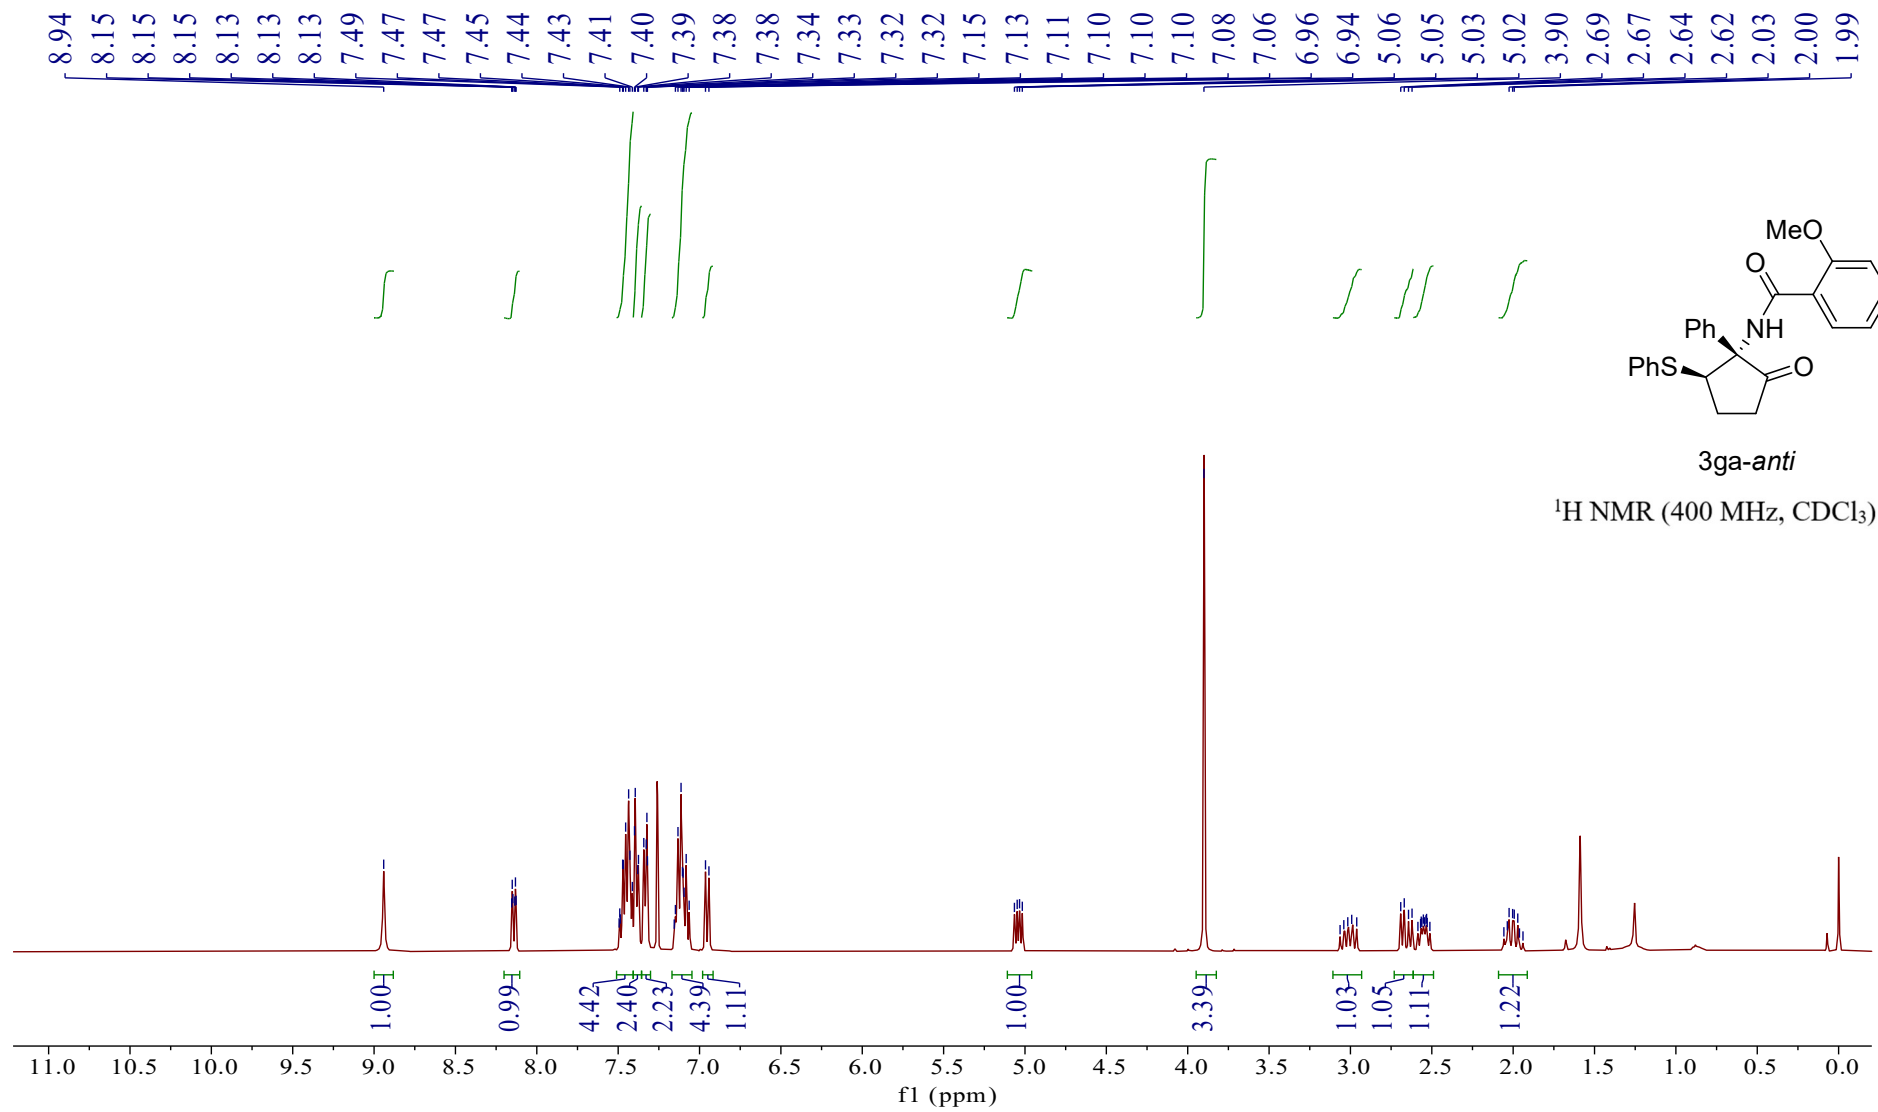

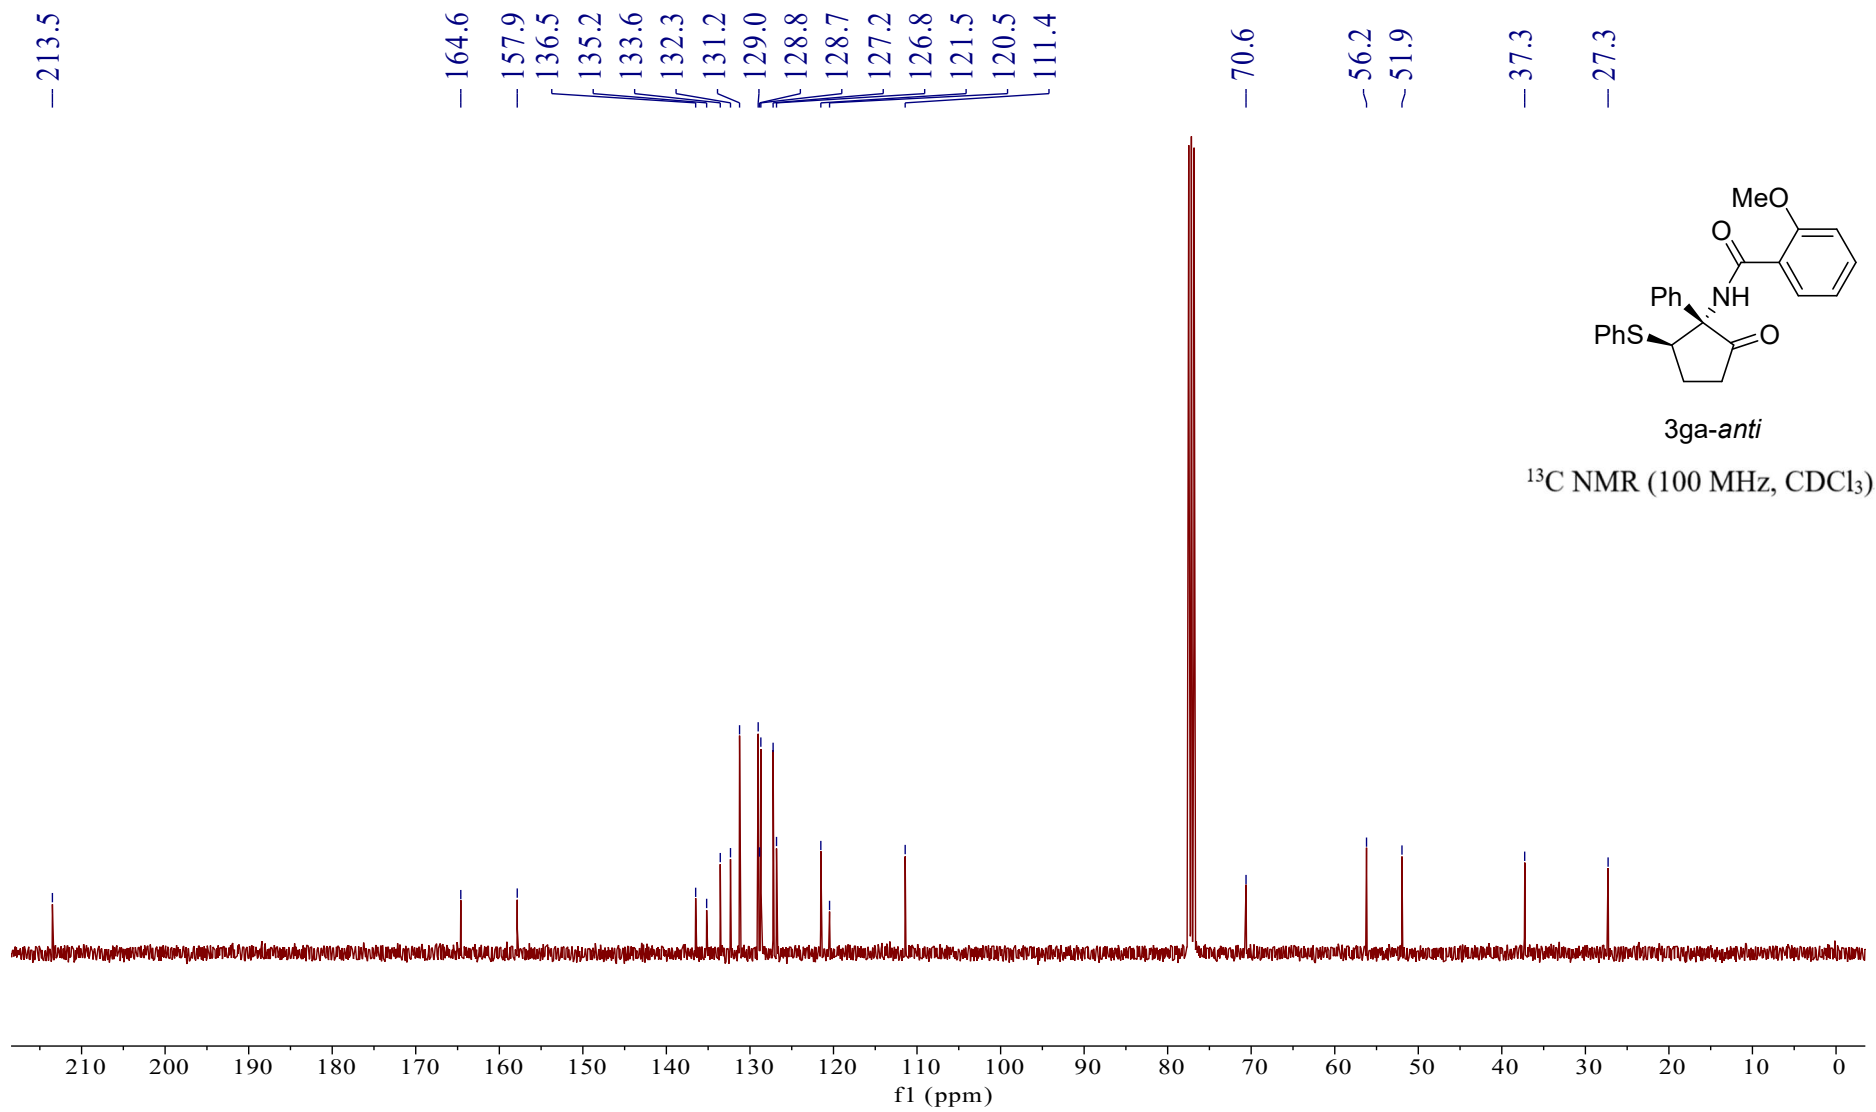

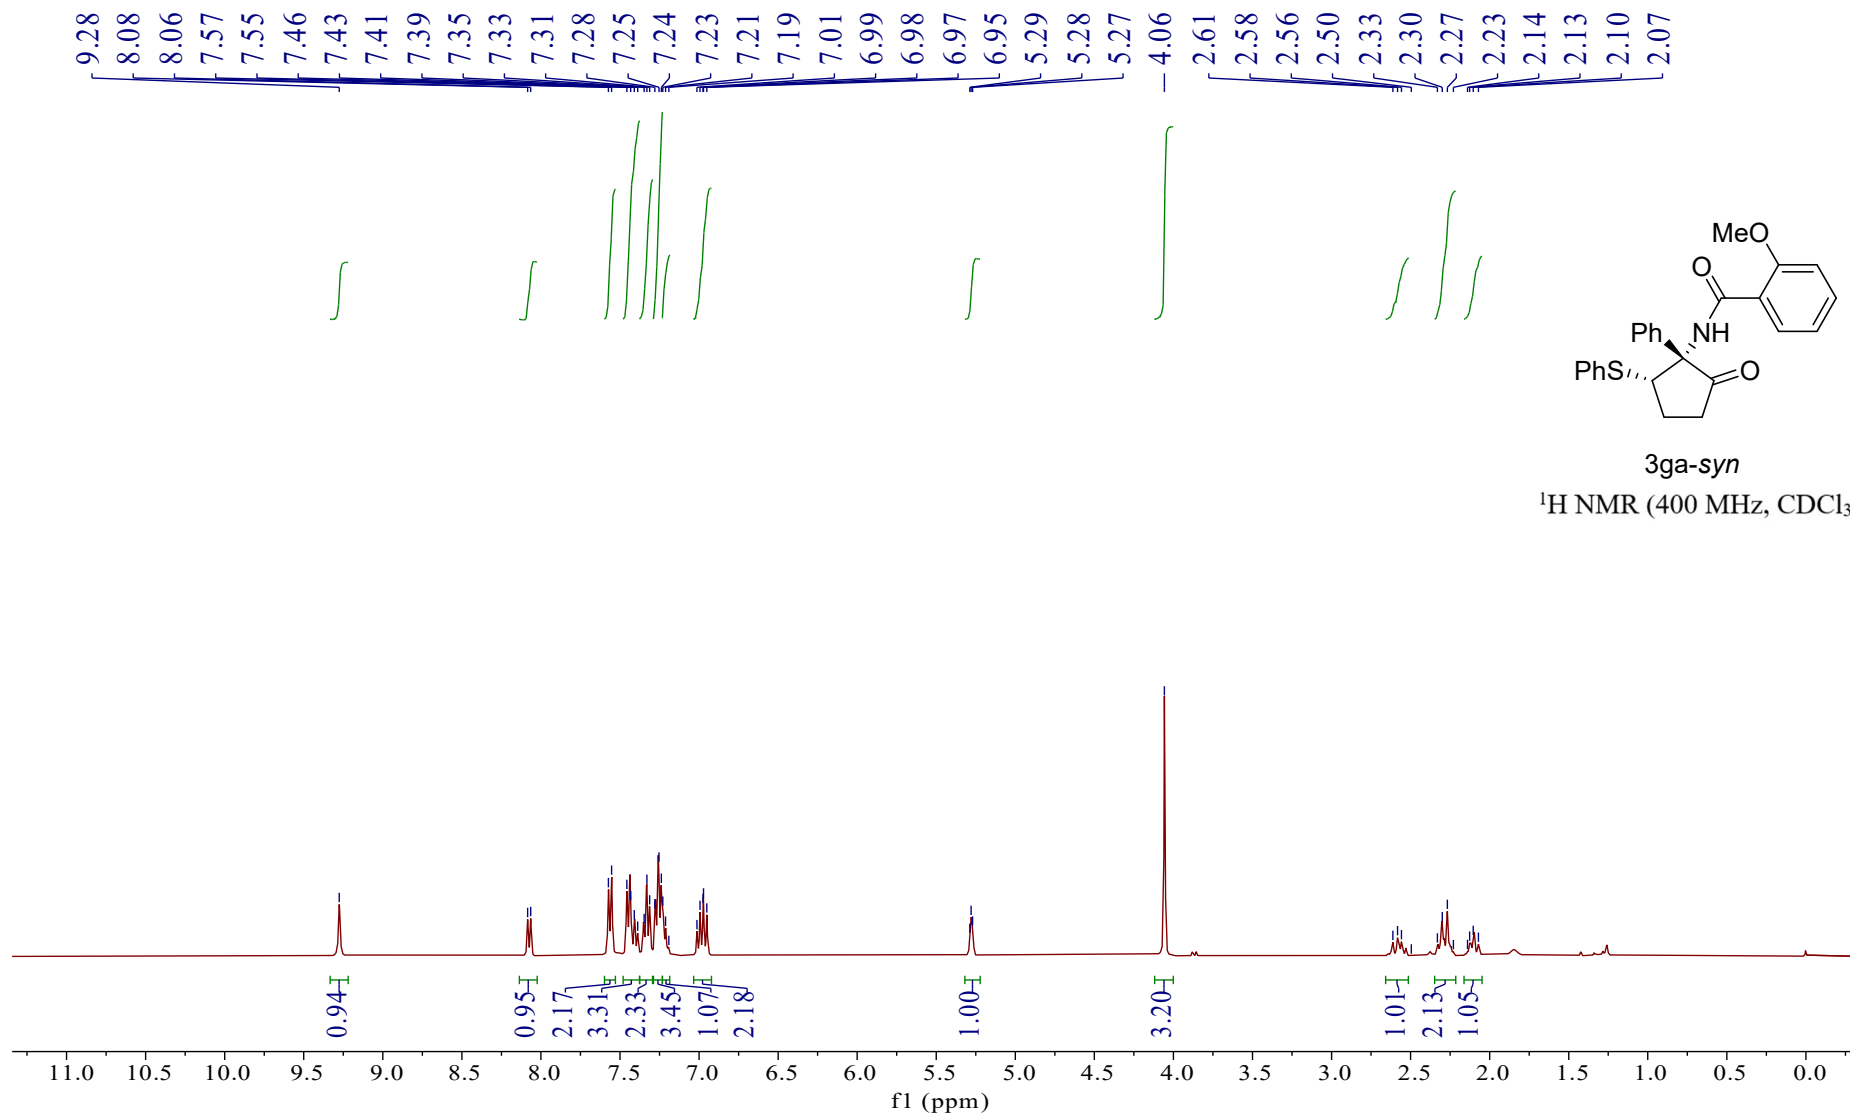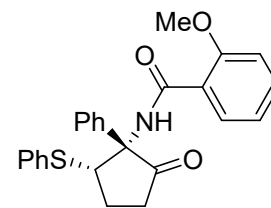

3ga-syn

<sup>1</sup>H NMR (400 MHz, CDCl<sub>3</sub>)



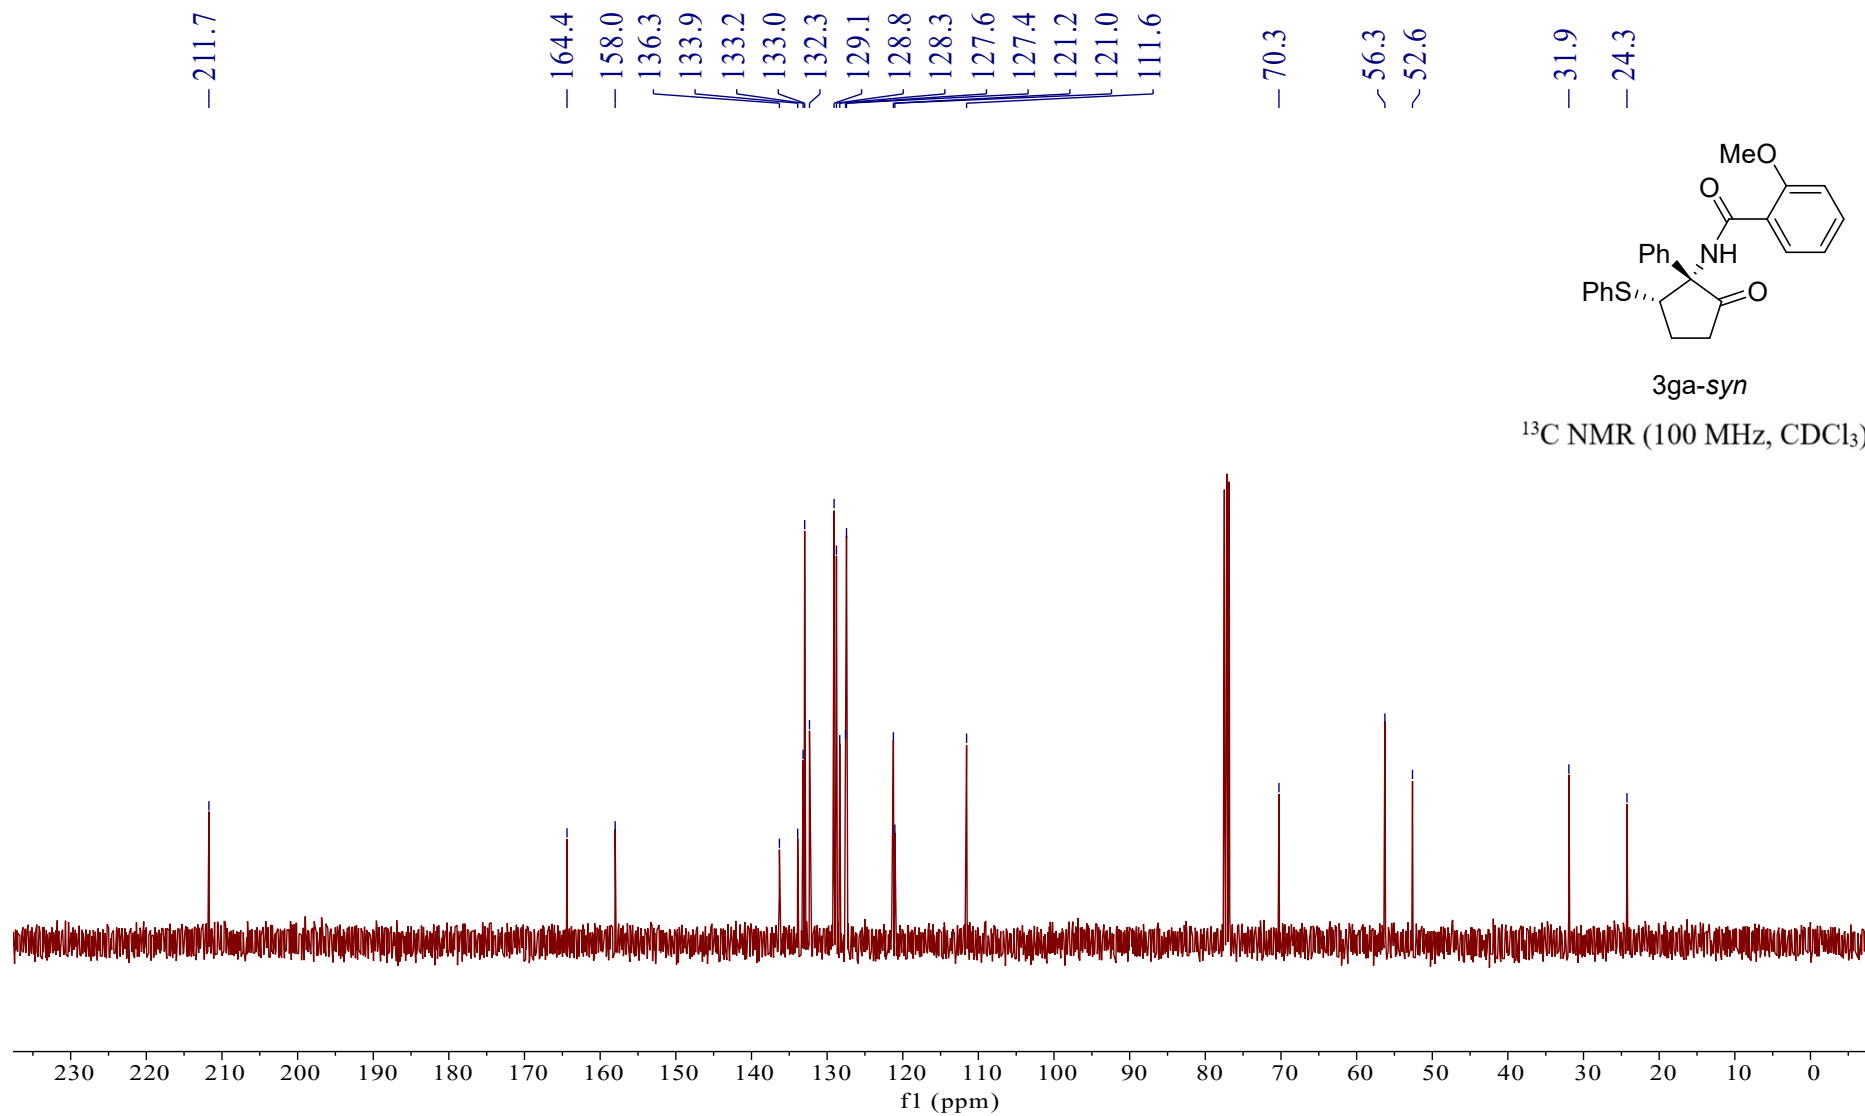

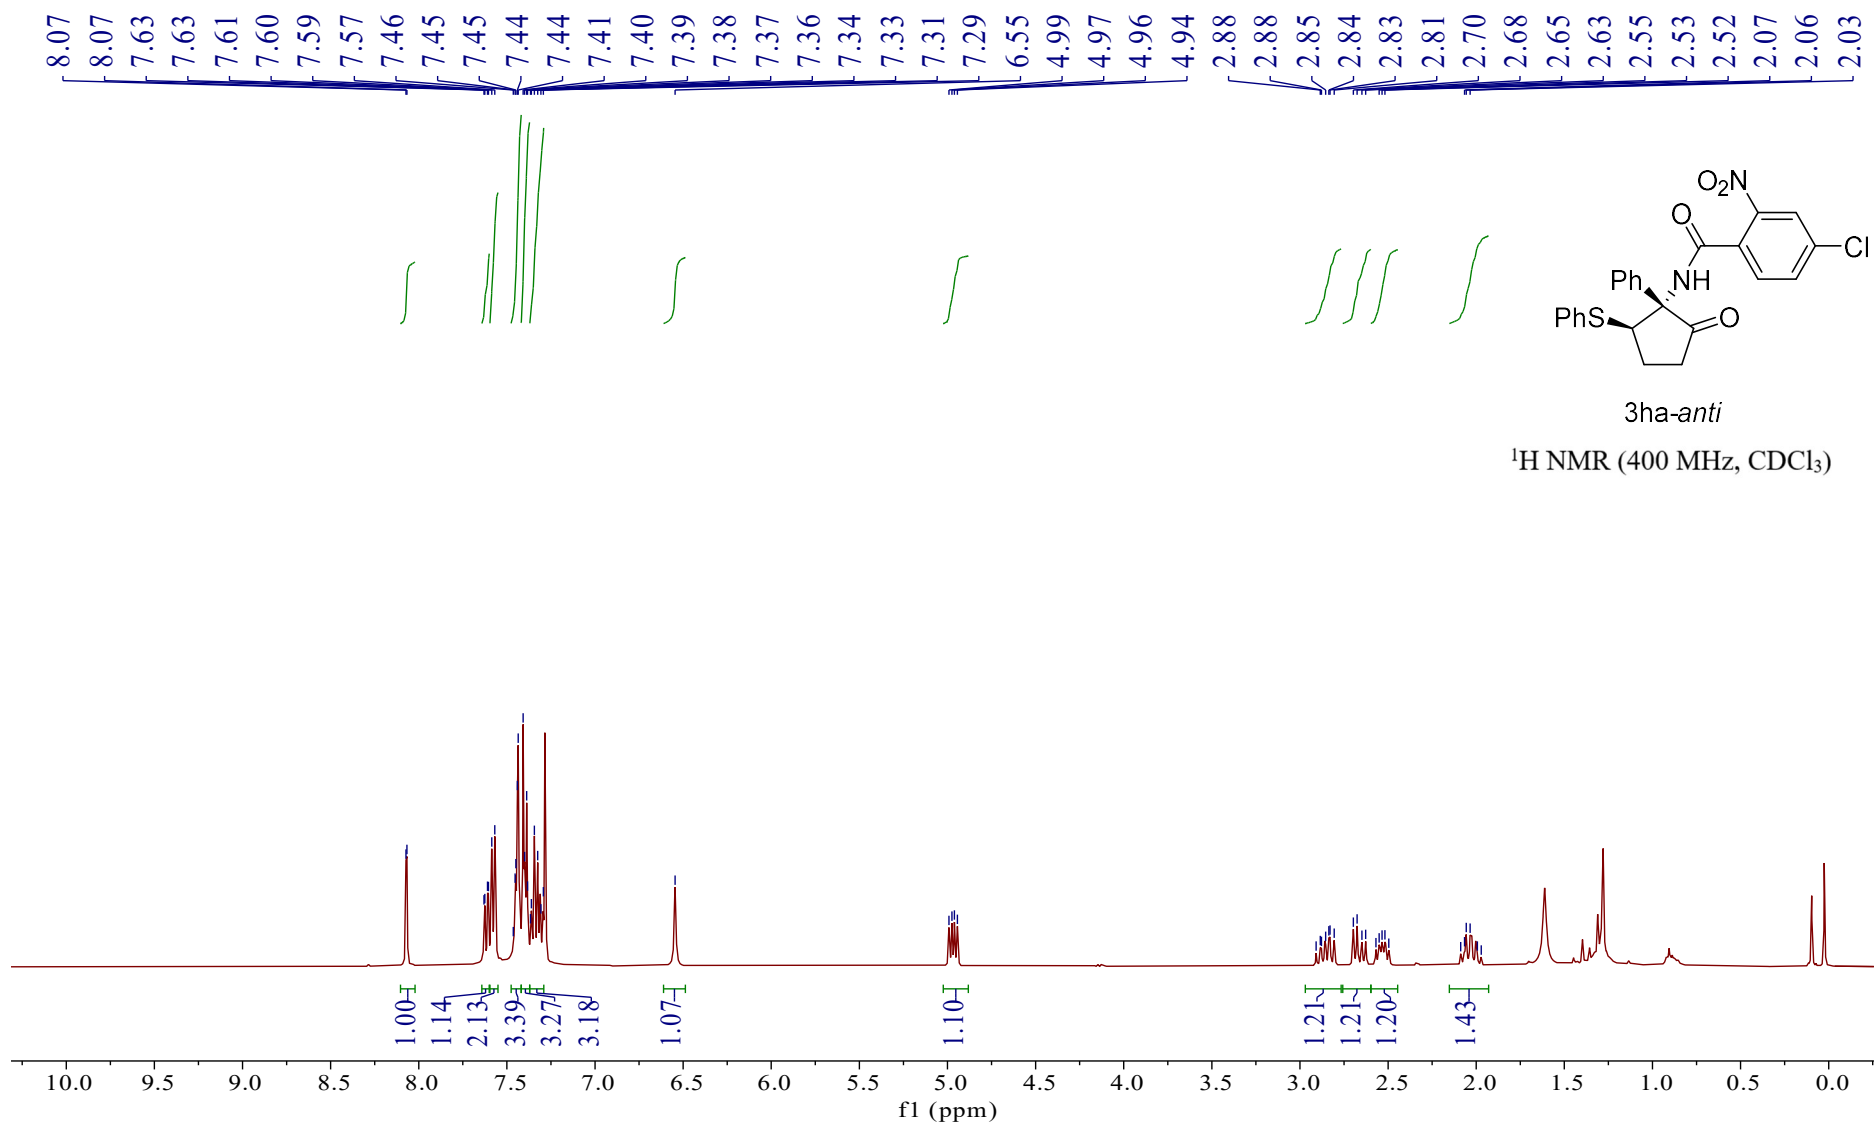

NMR-150

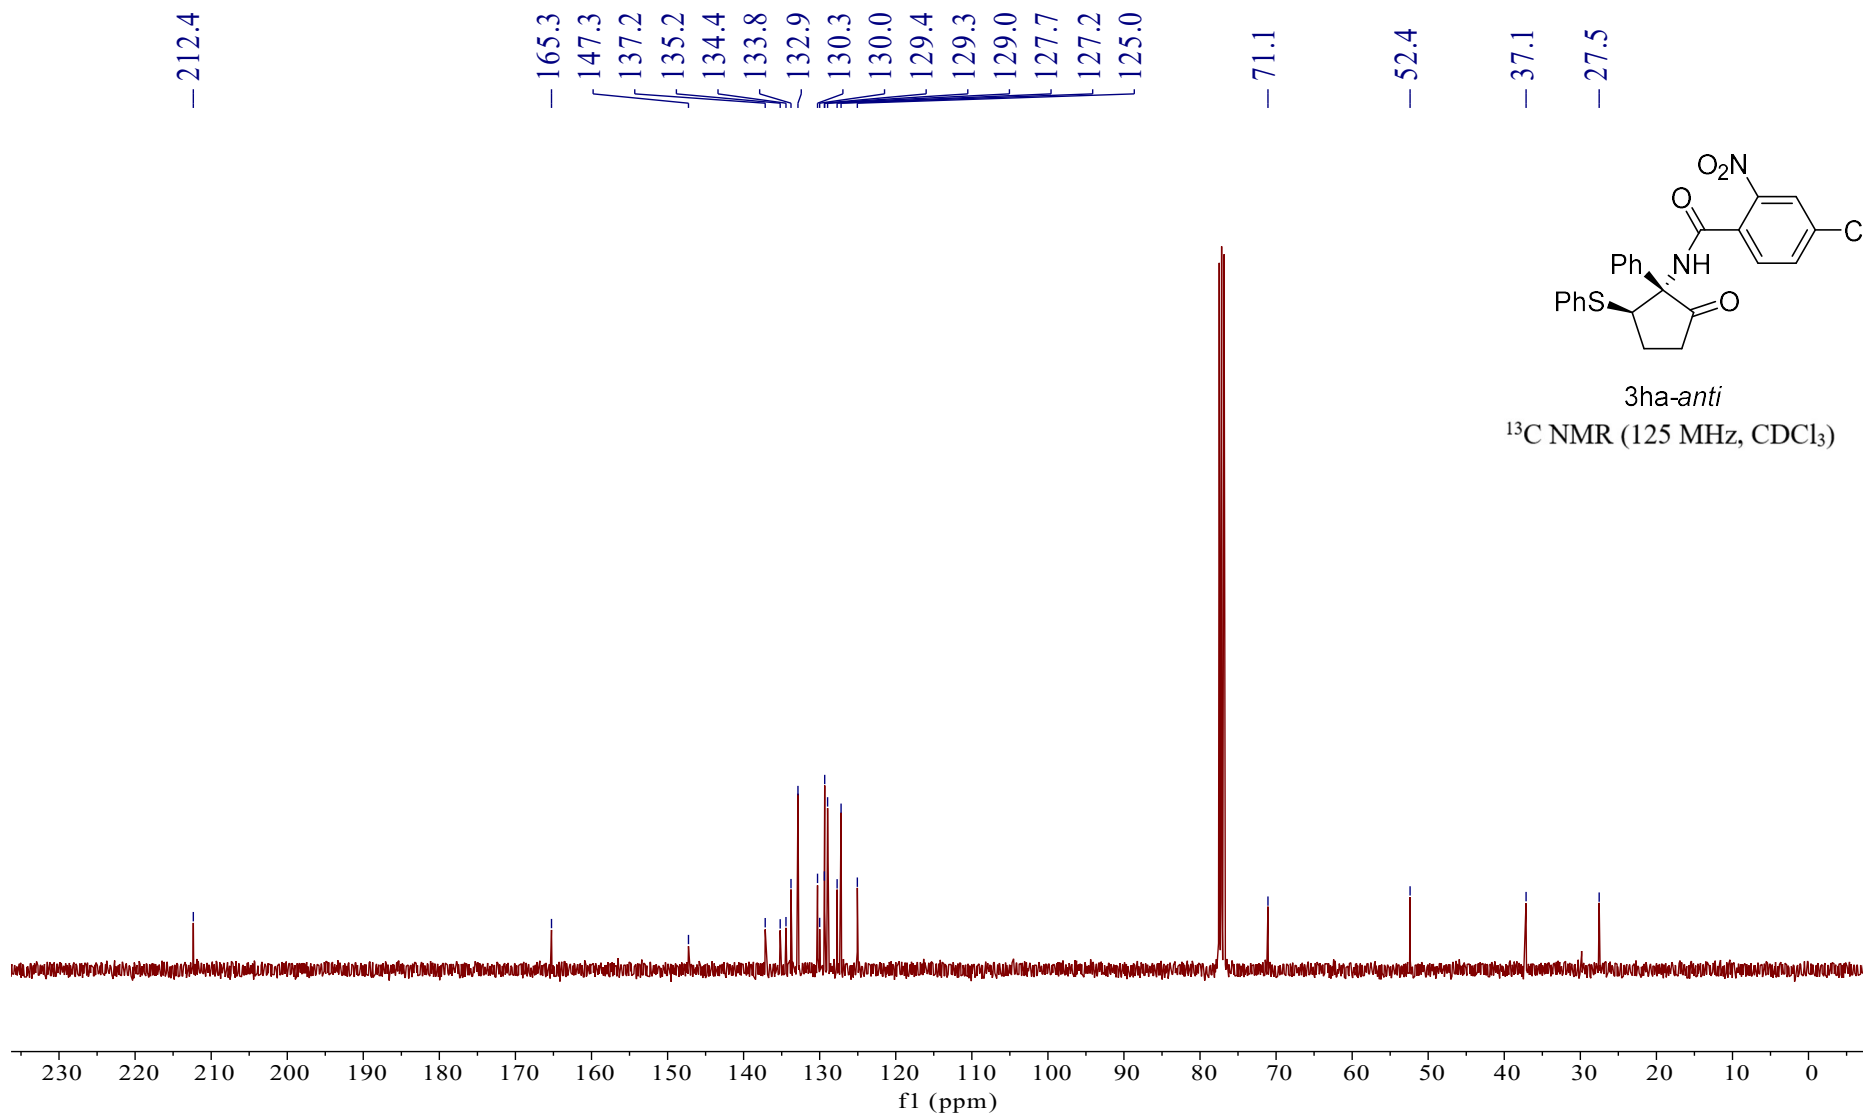

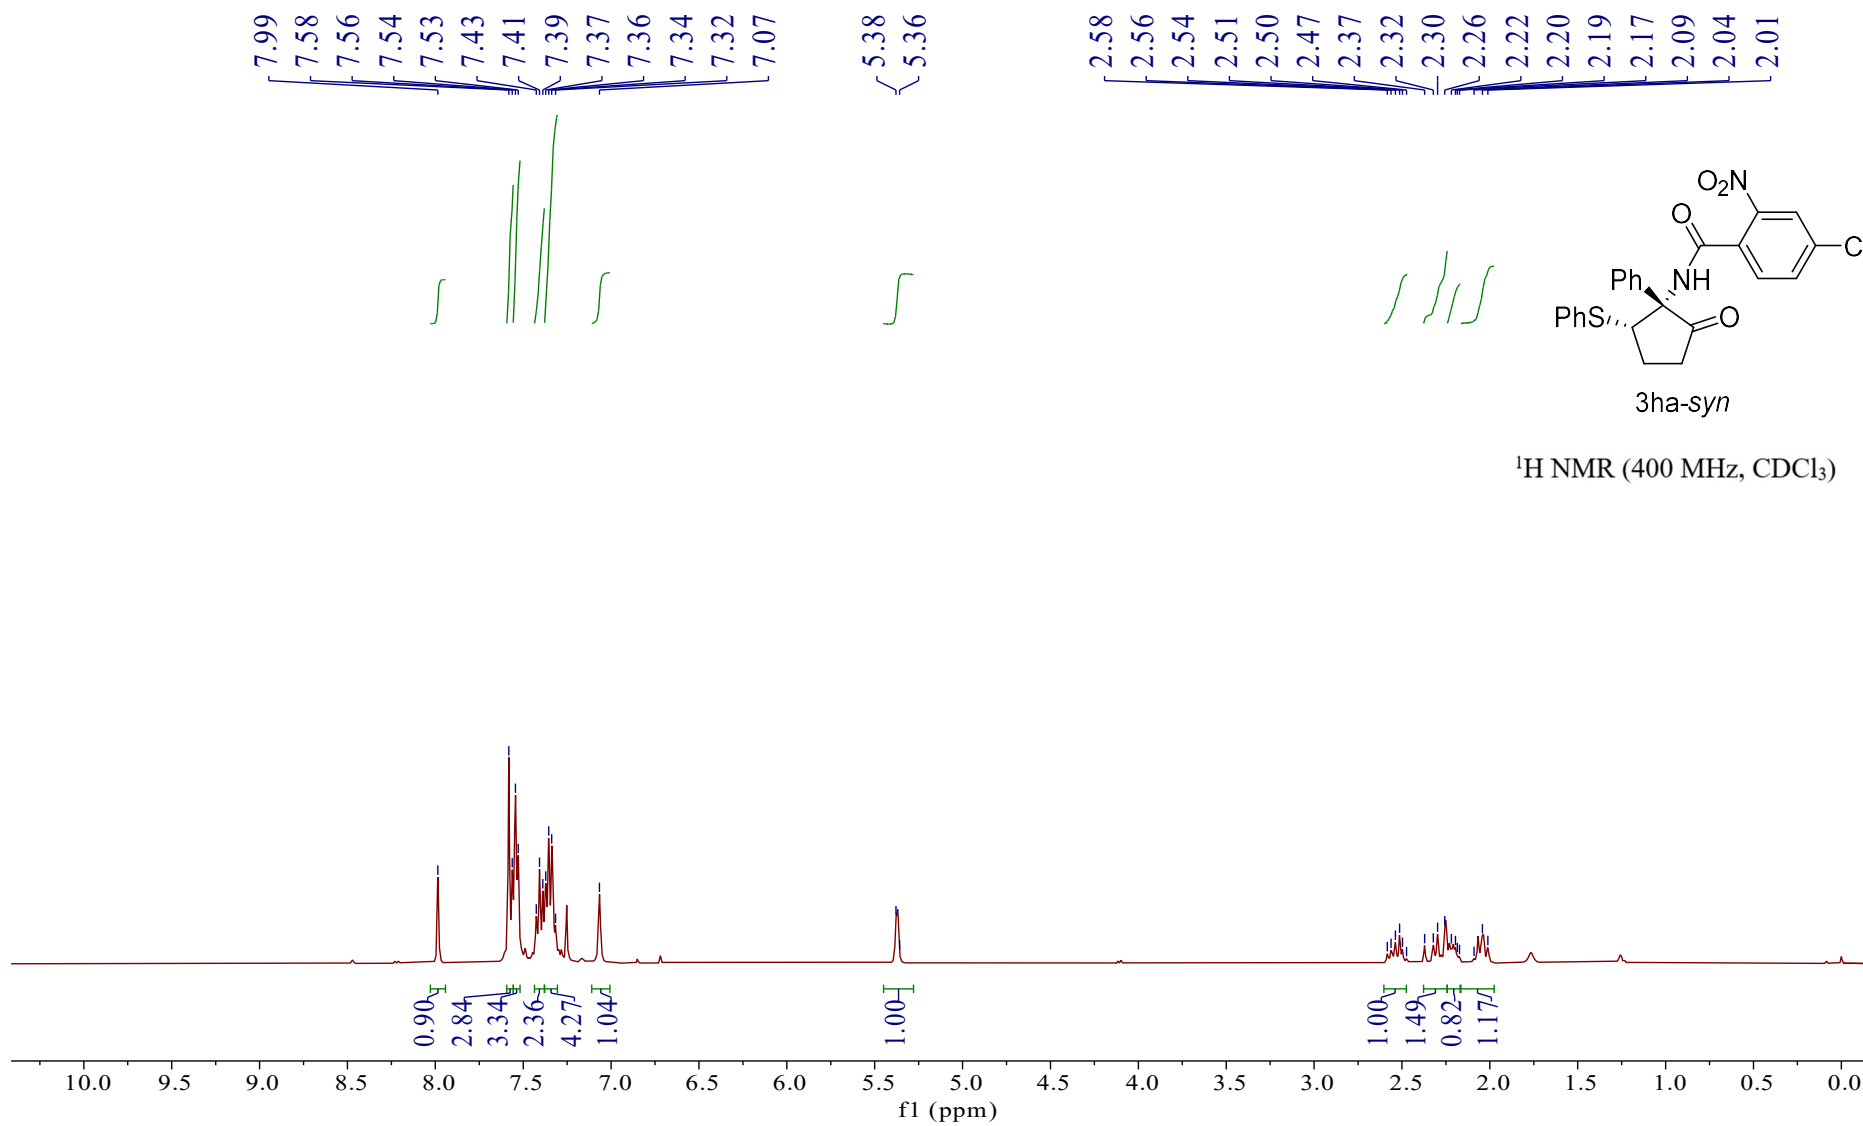

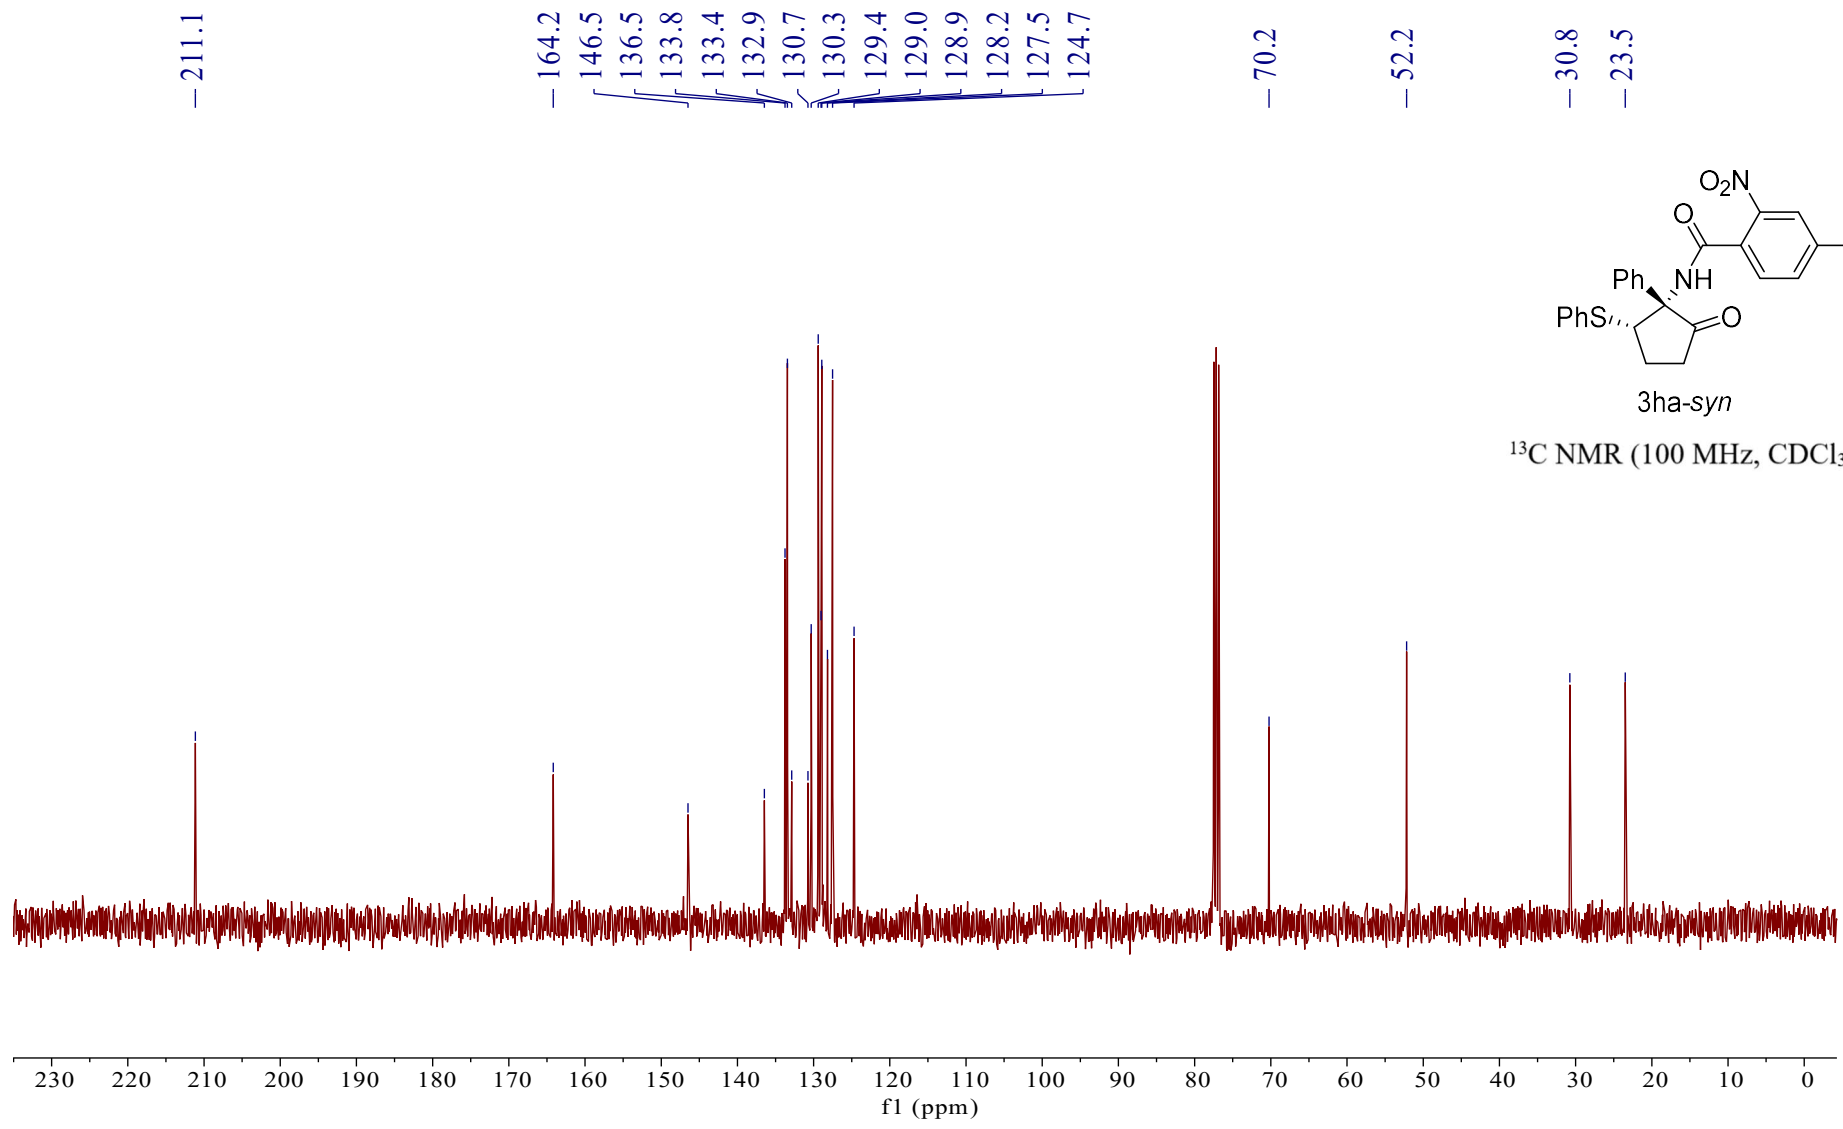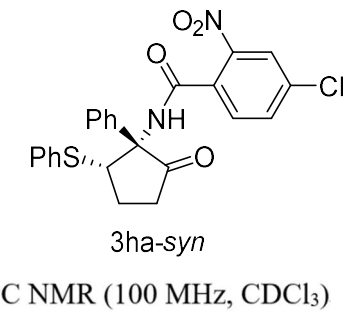

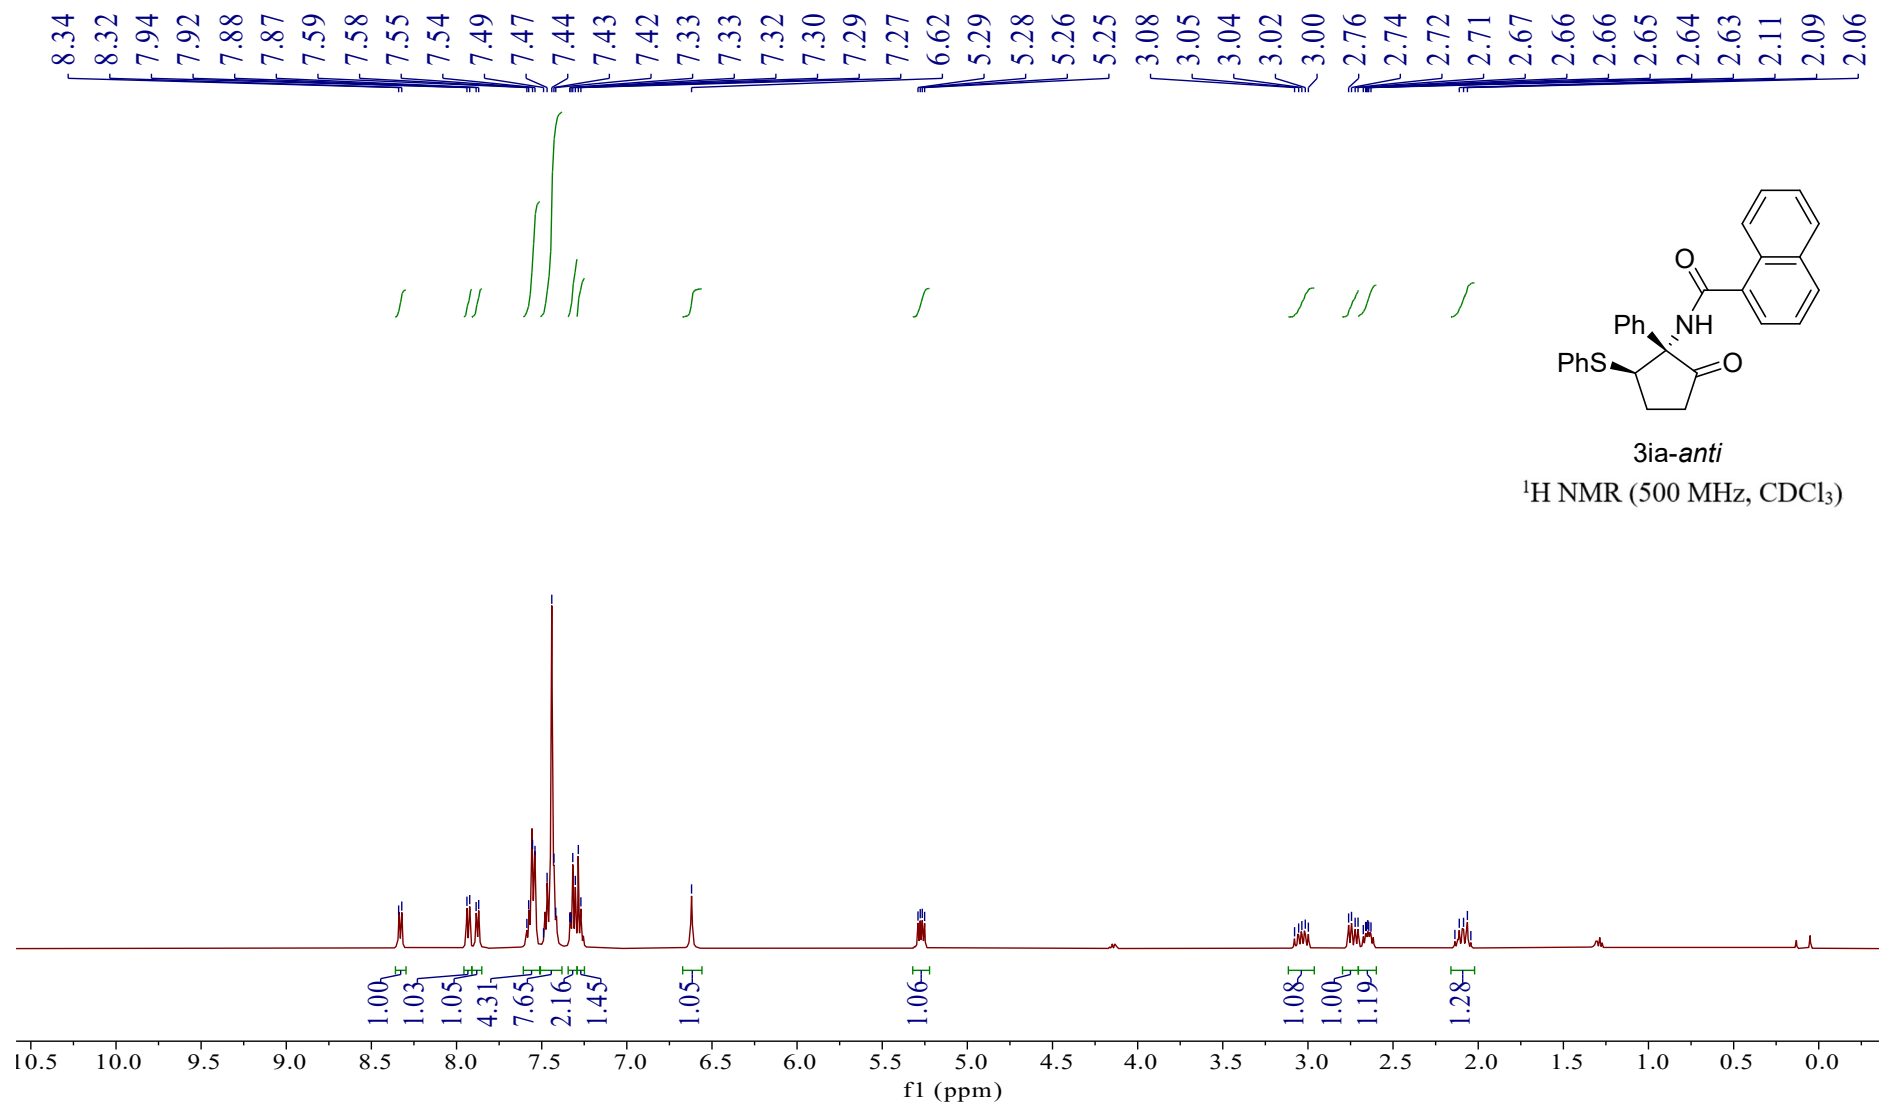

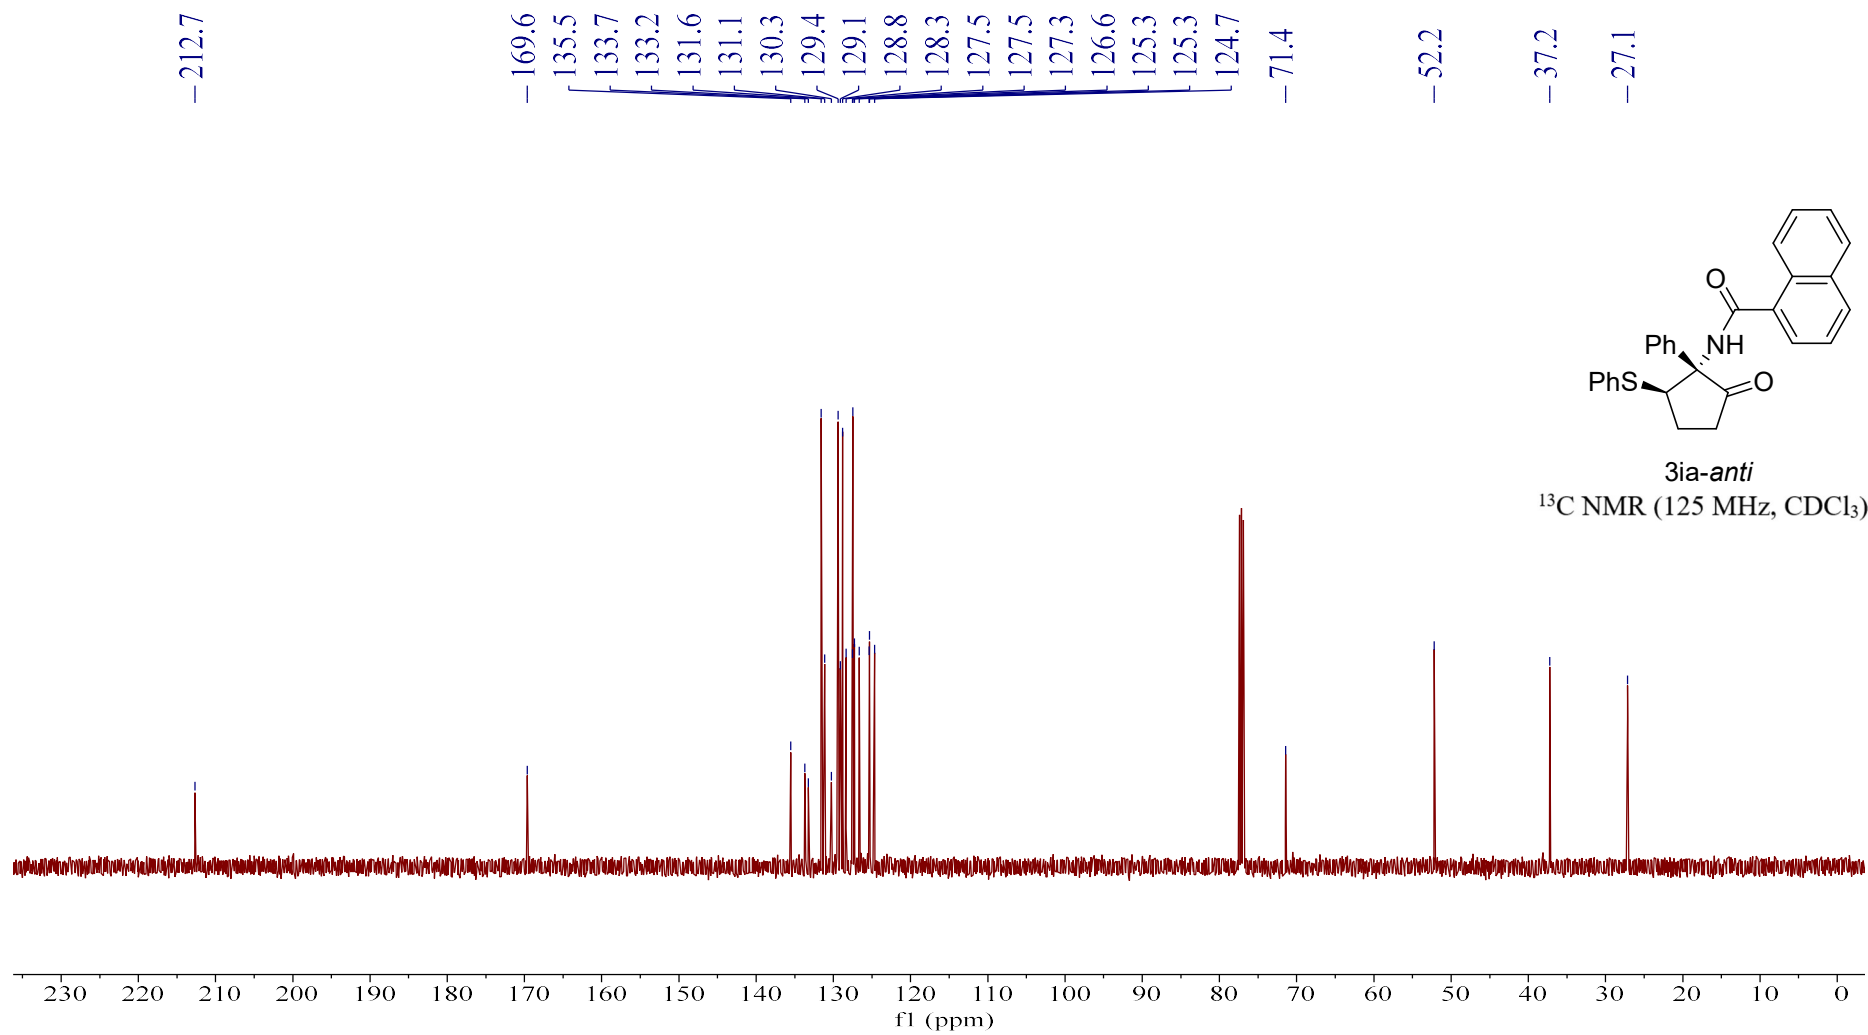

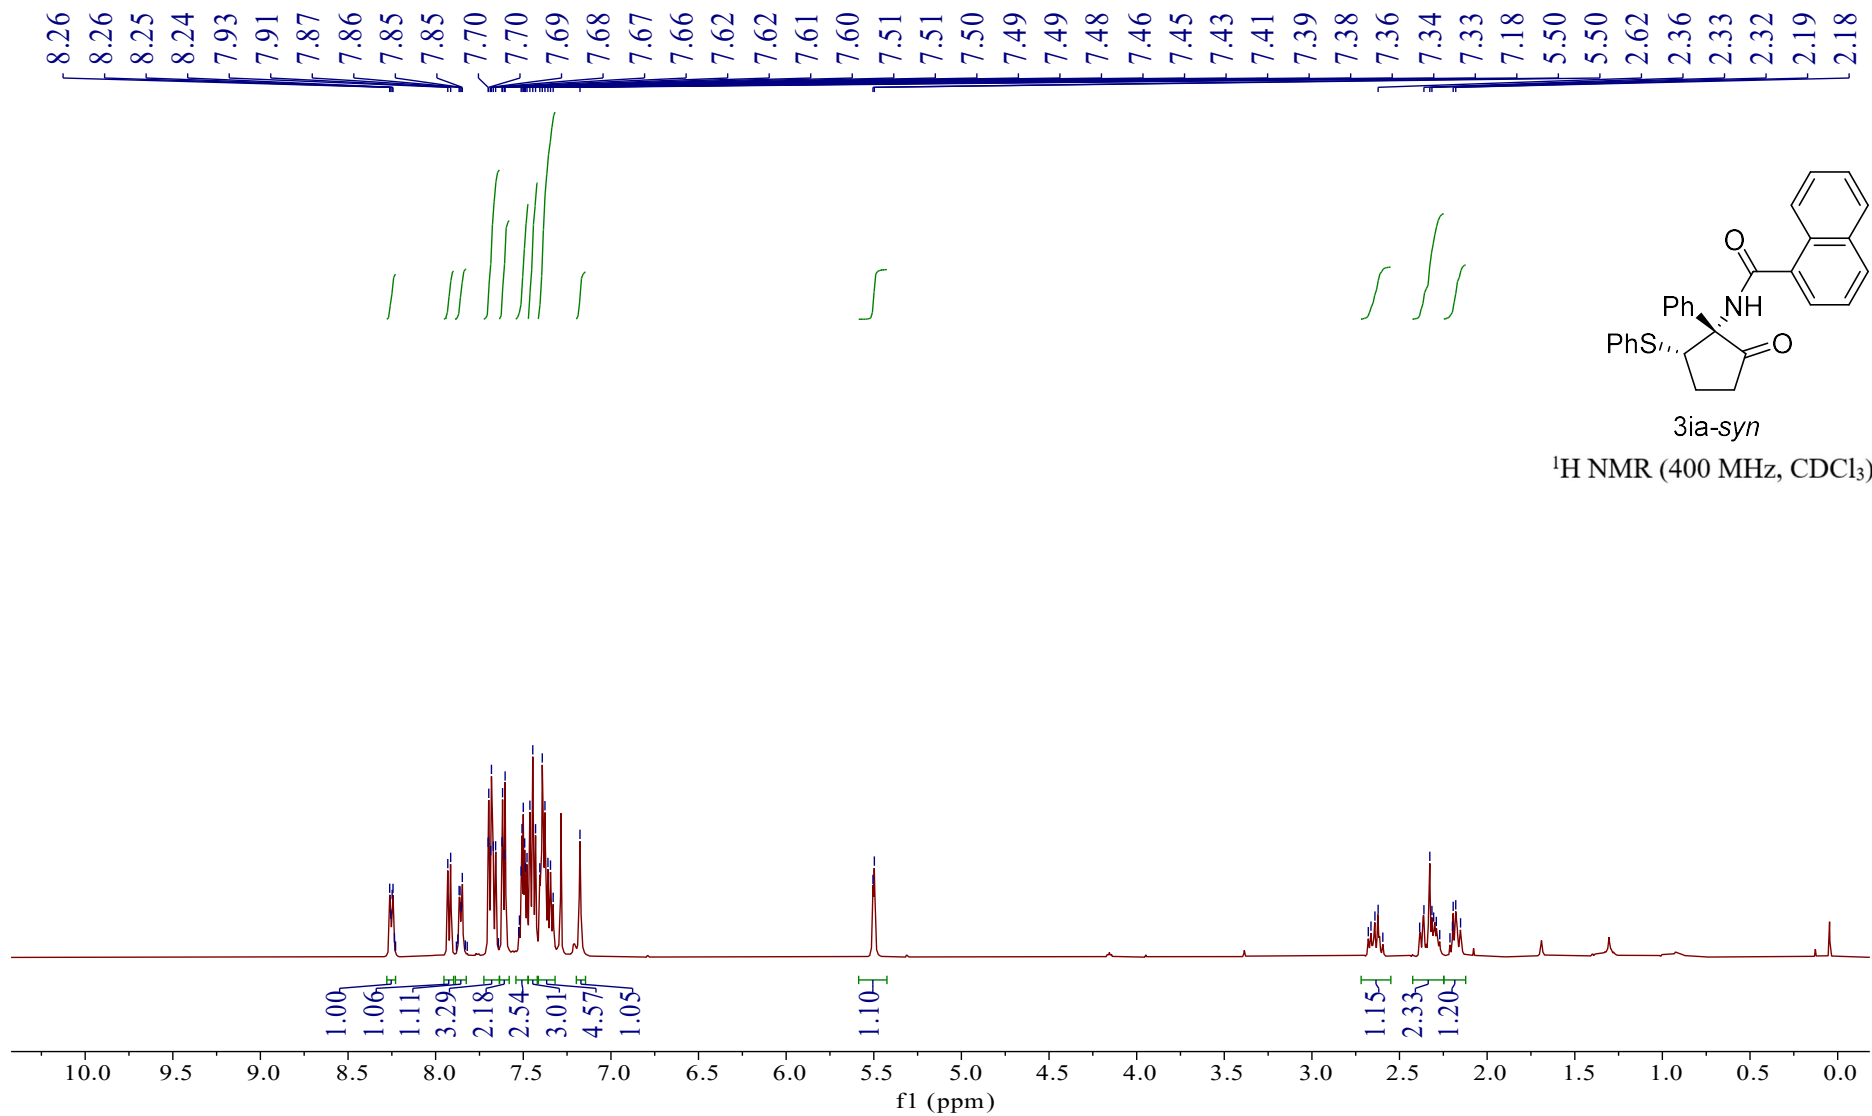

NMR-156



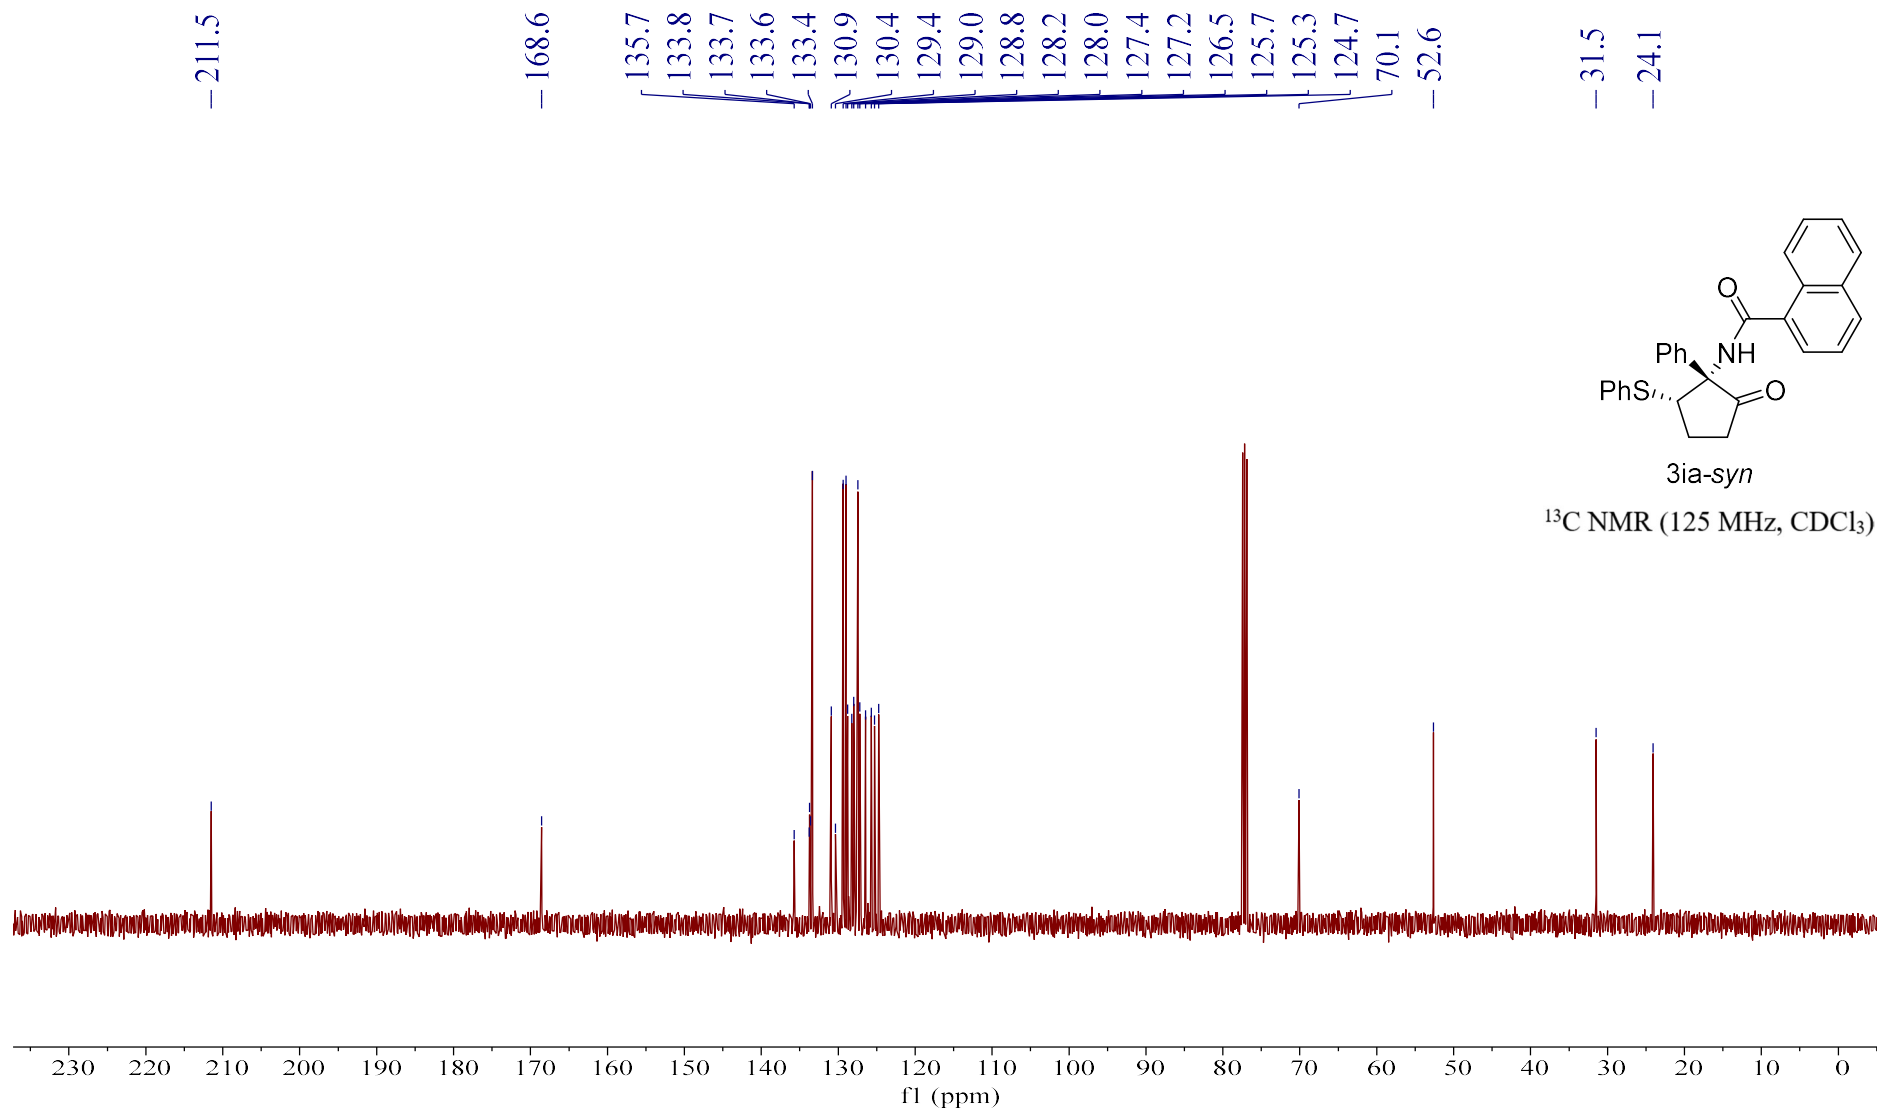

7.52  
7.51  
7.48  
7.46  
7.44  
7.43  
7.40  
7.38  
7.22  
7.21  
7.19  
7.18  
7.17  
7.15  
7.07  
— 6.56

5.06  
5.05  
5.04  
5.02  
2.98  
2.96  
2.94  
2.92  
2.90  
2.68  
2.66  
2.64  
2.63  
2.58  
2.57  
2.55  
2.54  
2.52  
2.06  
2.04  
2.01  
1.99  
1.97

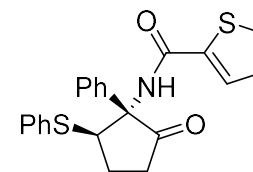

3ja-anti

<sup>1</sup>H NMR (500 MHz, CDCl<sub>3</sub>)

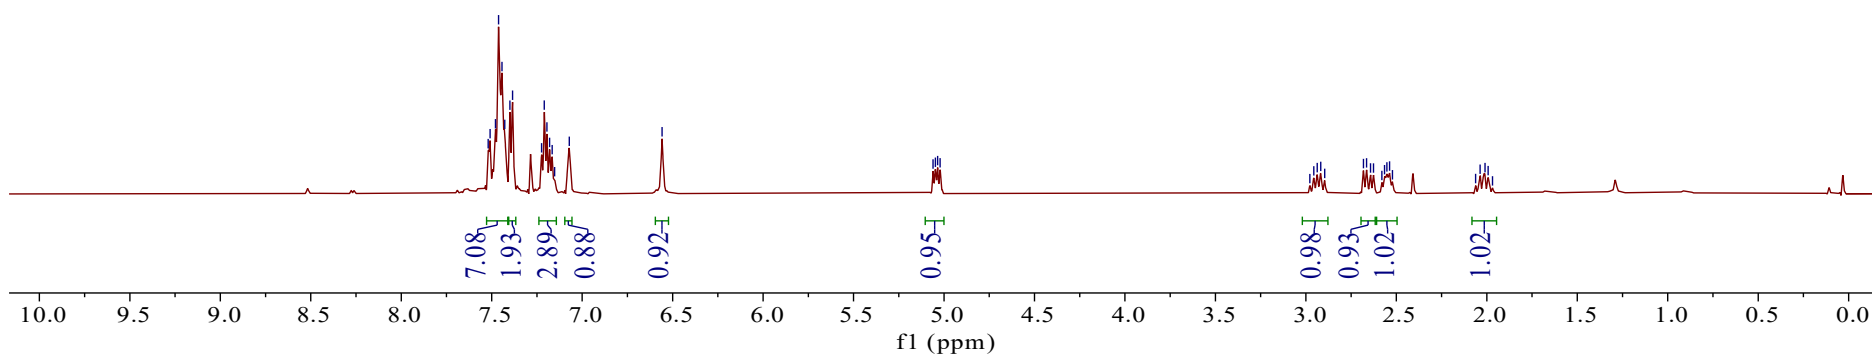

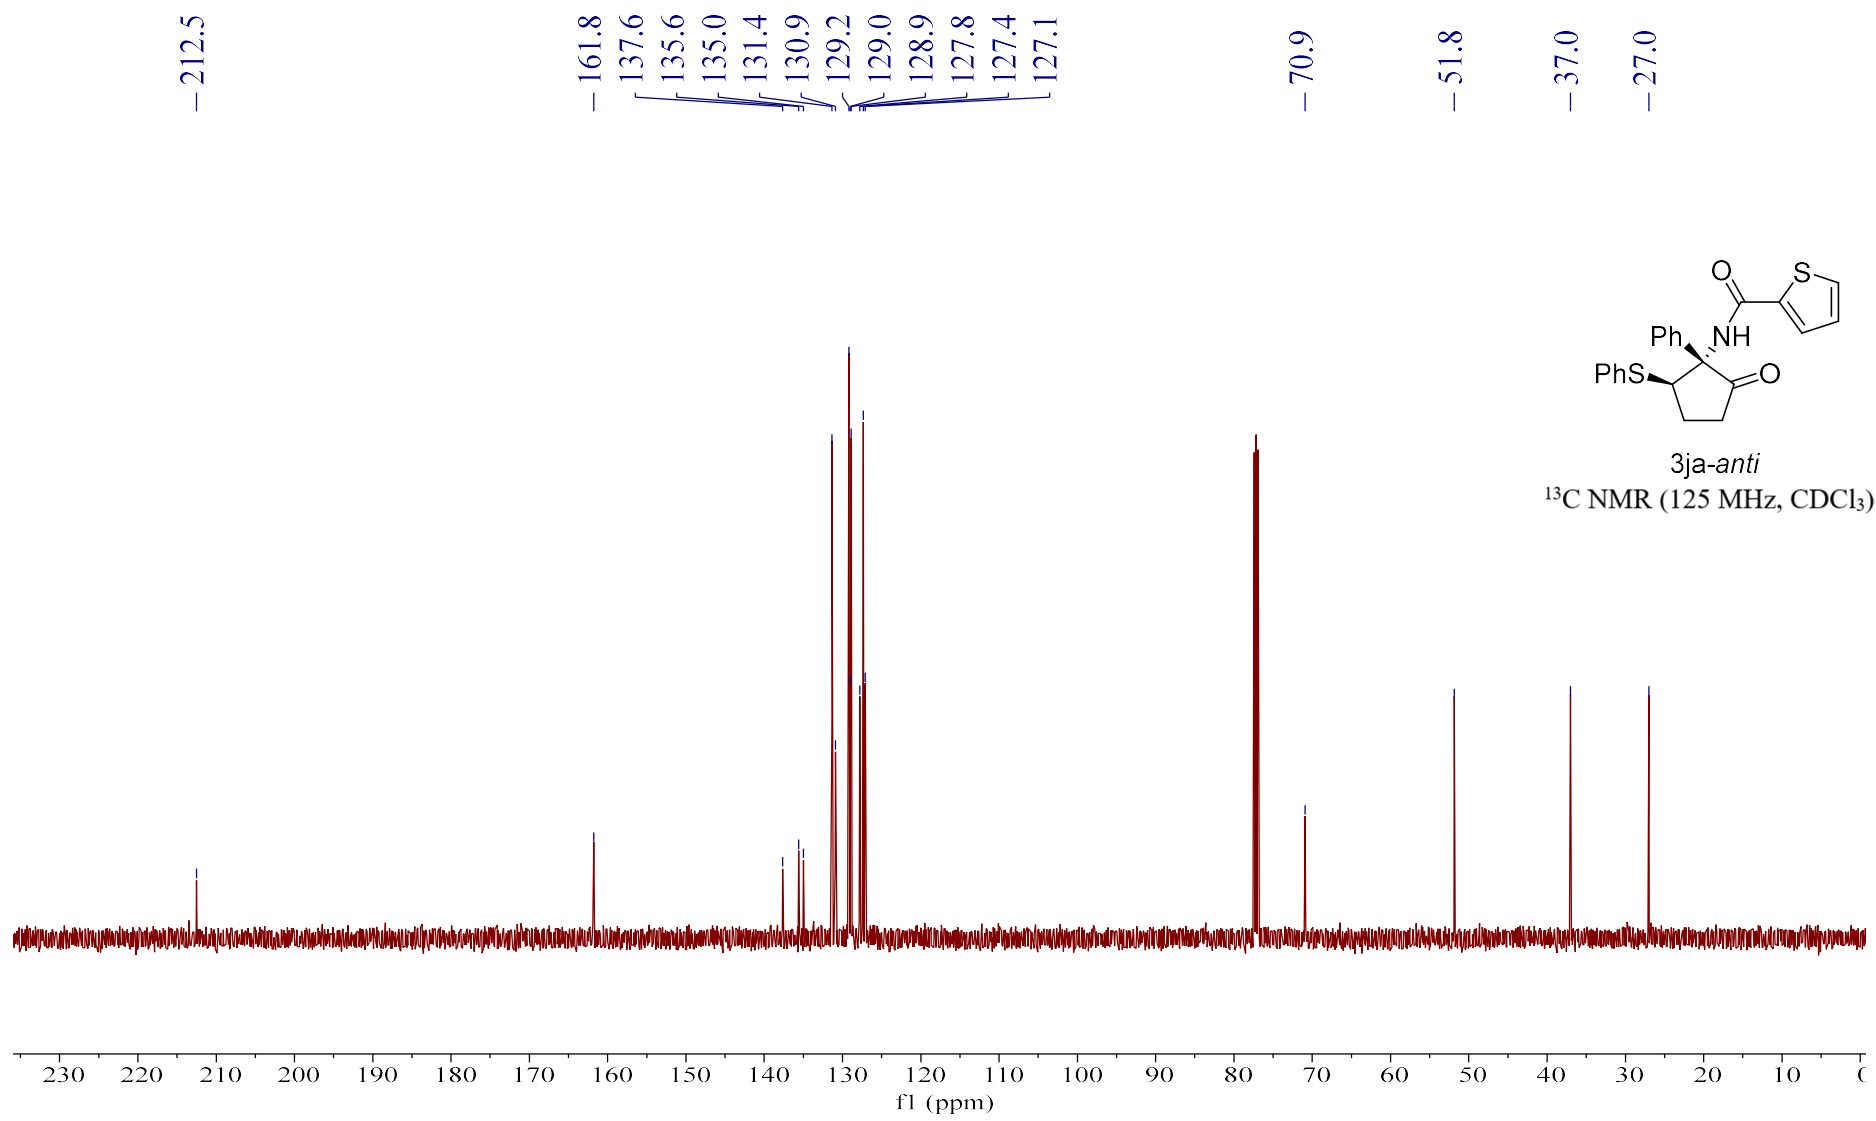

7.59  
7.58  
7.54  
7.54  
7.52  
7.50  
7.46  
7.45  
7.39  
7.37  
7.36  
7.33  
7.32  
7.30  
7.29  
7.28  
7.28  
7.15  
7.06  
7.06  
7.05

2.63  
2.61  
2.59  
2.57  
2.55  
2.35  
2.33  
2.31  
2.29  
2.27  
2.26  
2.25  
2.24  
2.22  
2.11  
2.09  
2.06

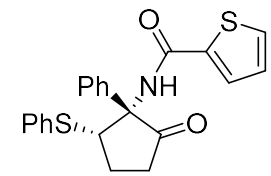

3ja-syn

<sup>1</sup>H NMR (500 MHz, CDCl<sub>3</sub>)

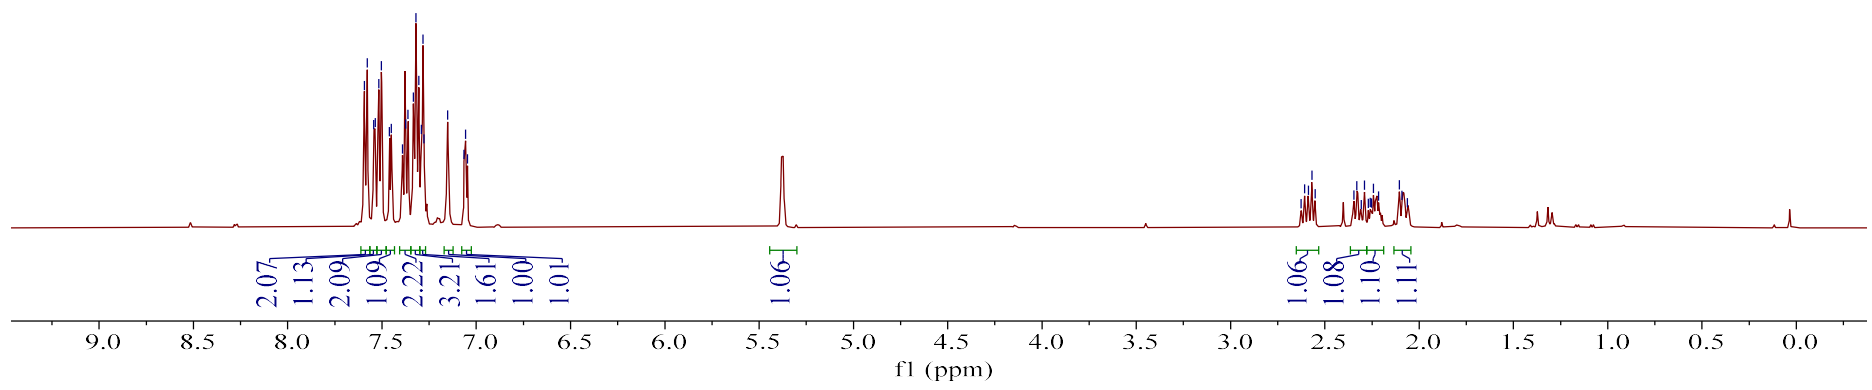

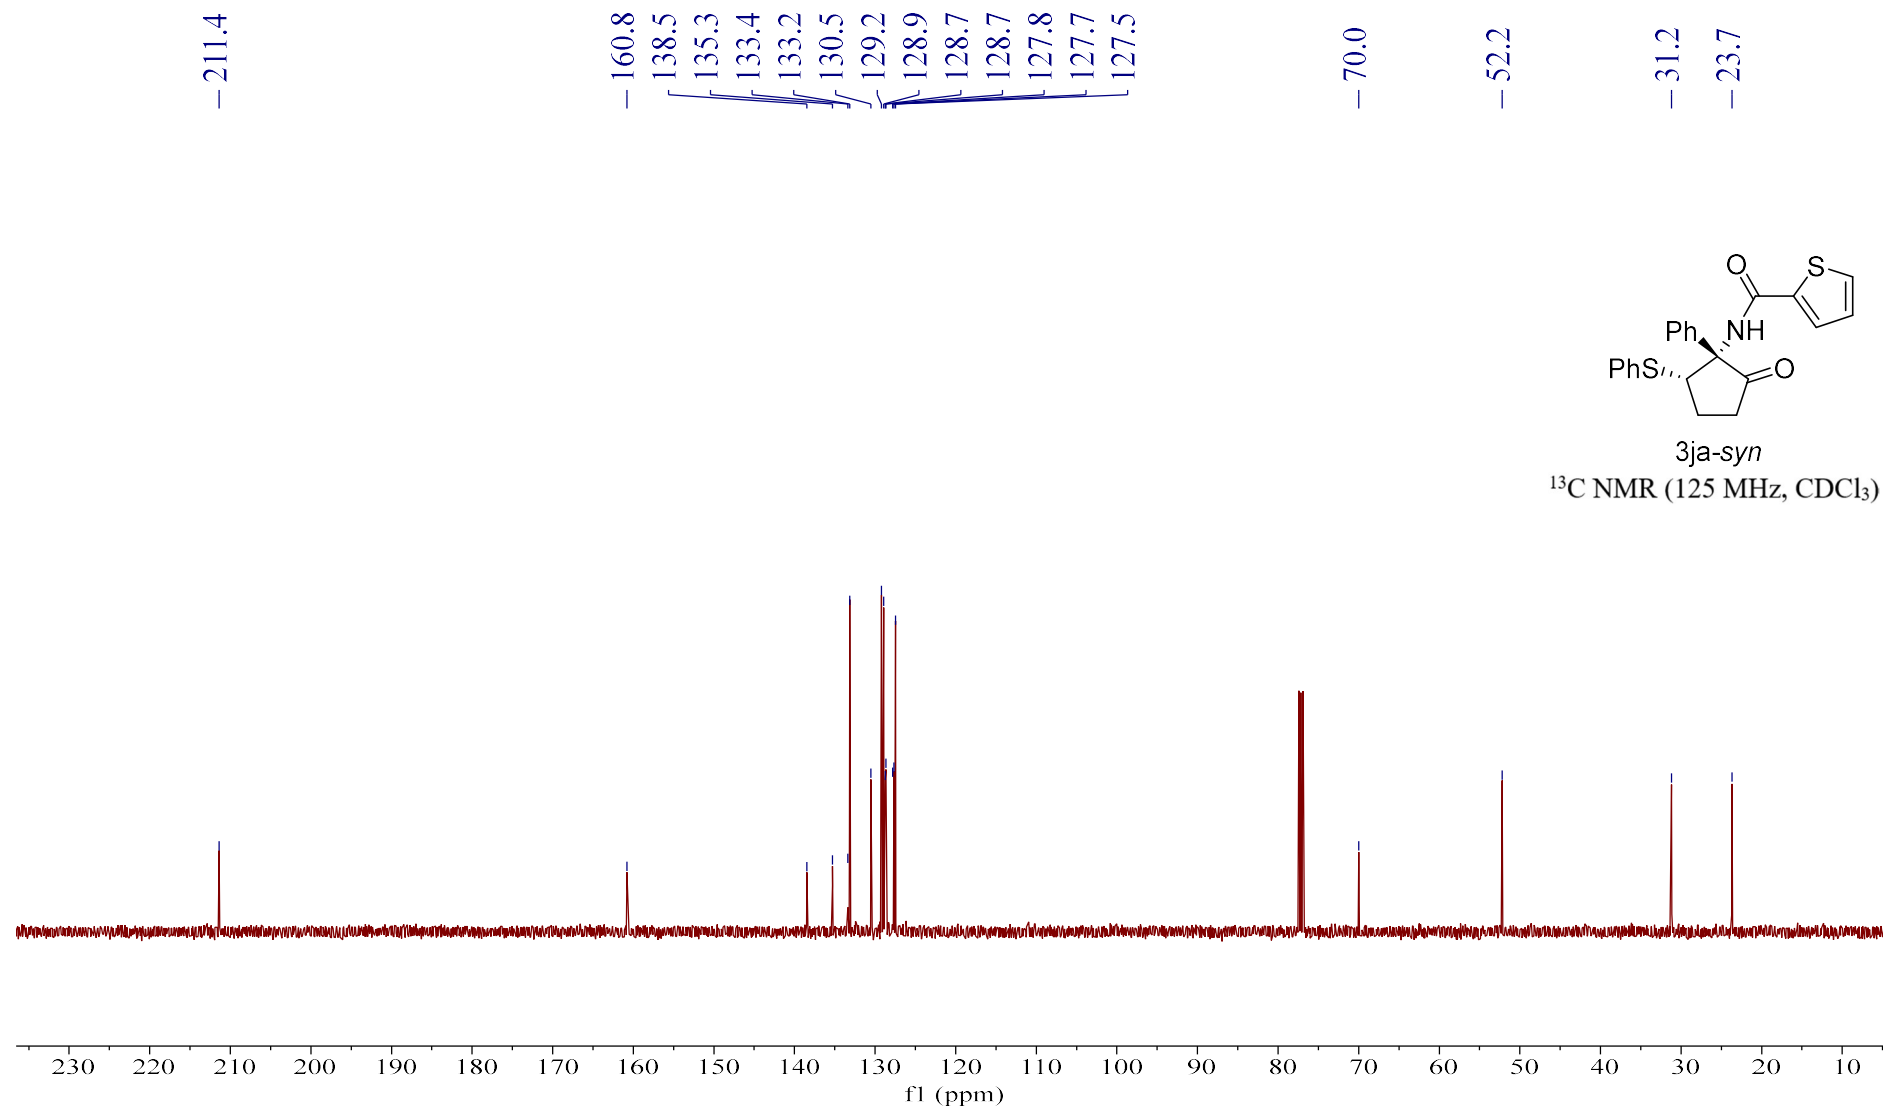

NMR-161

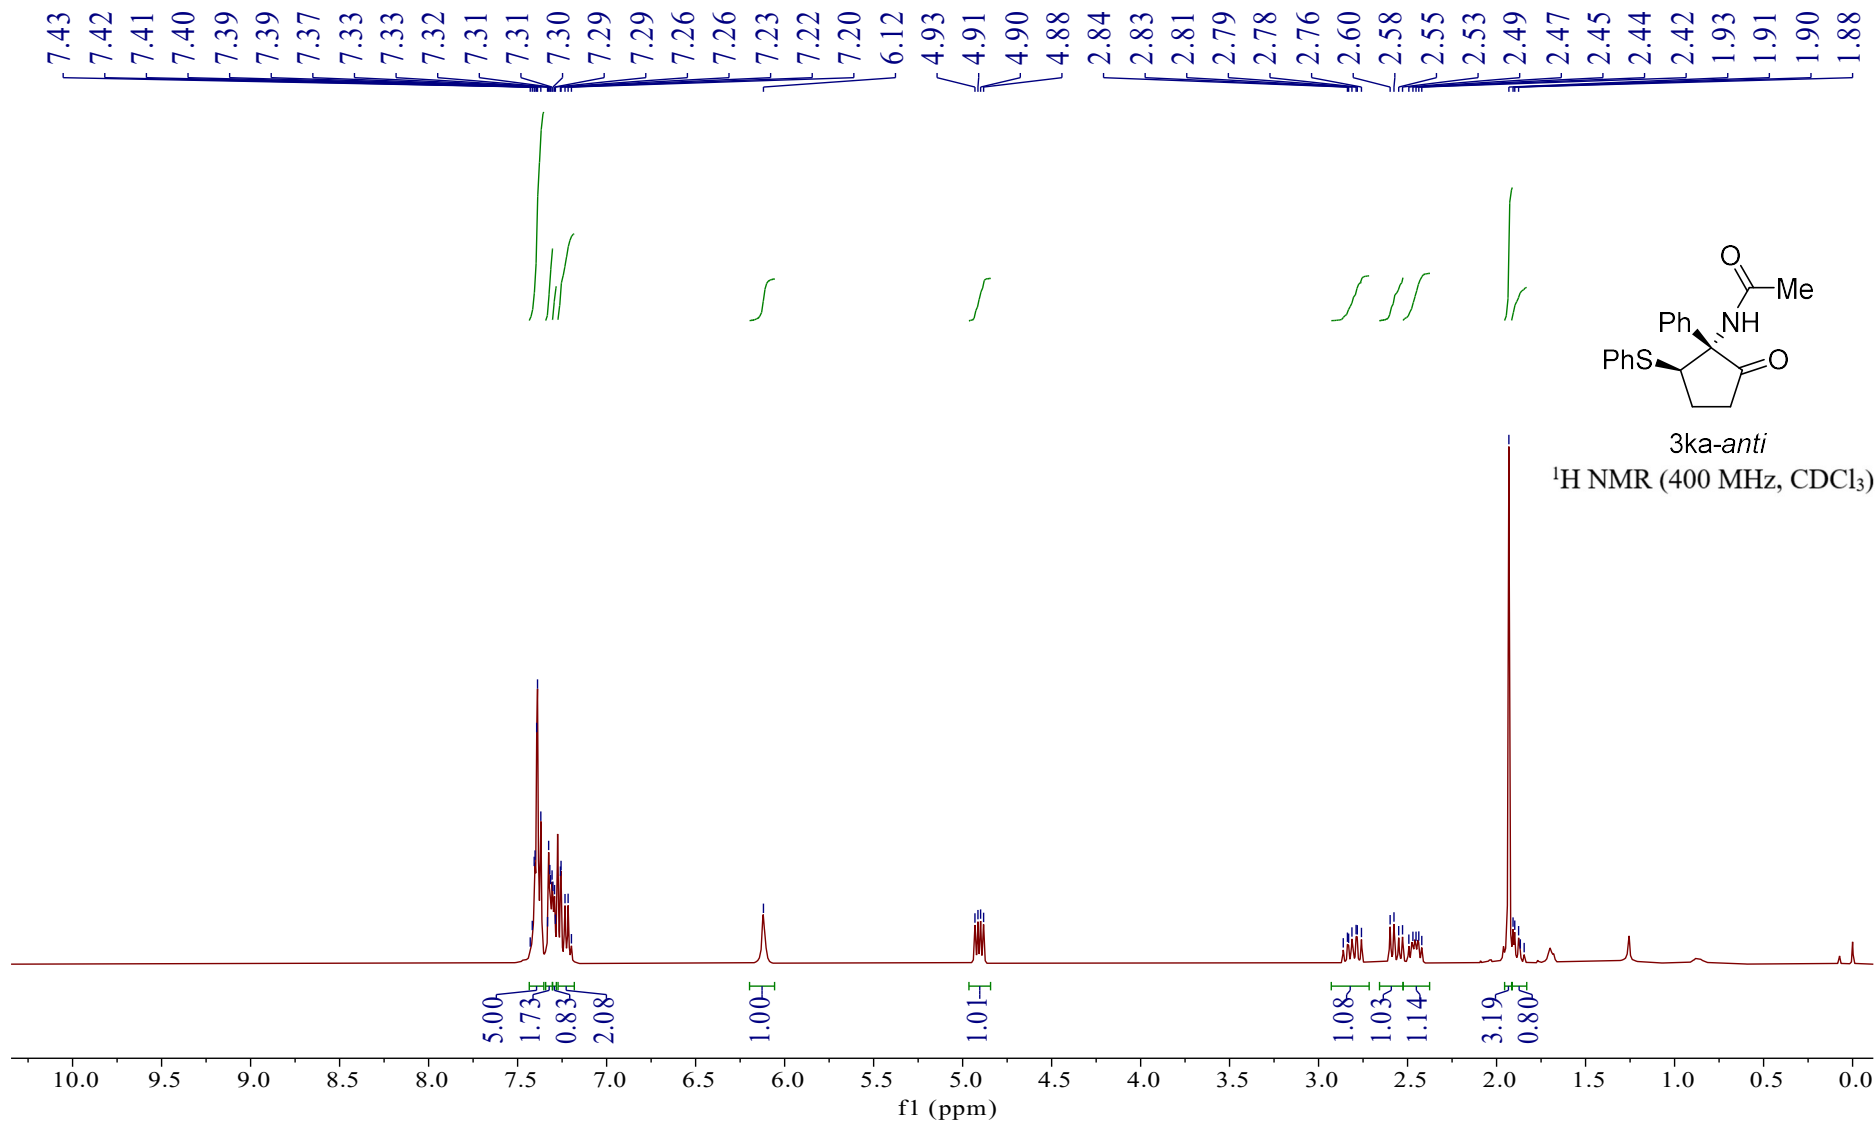

NMR-162

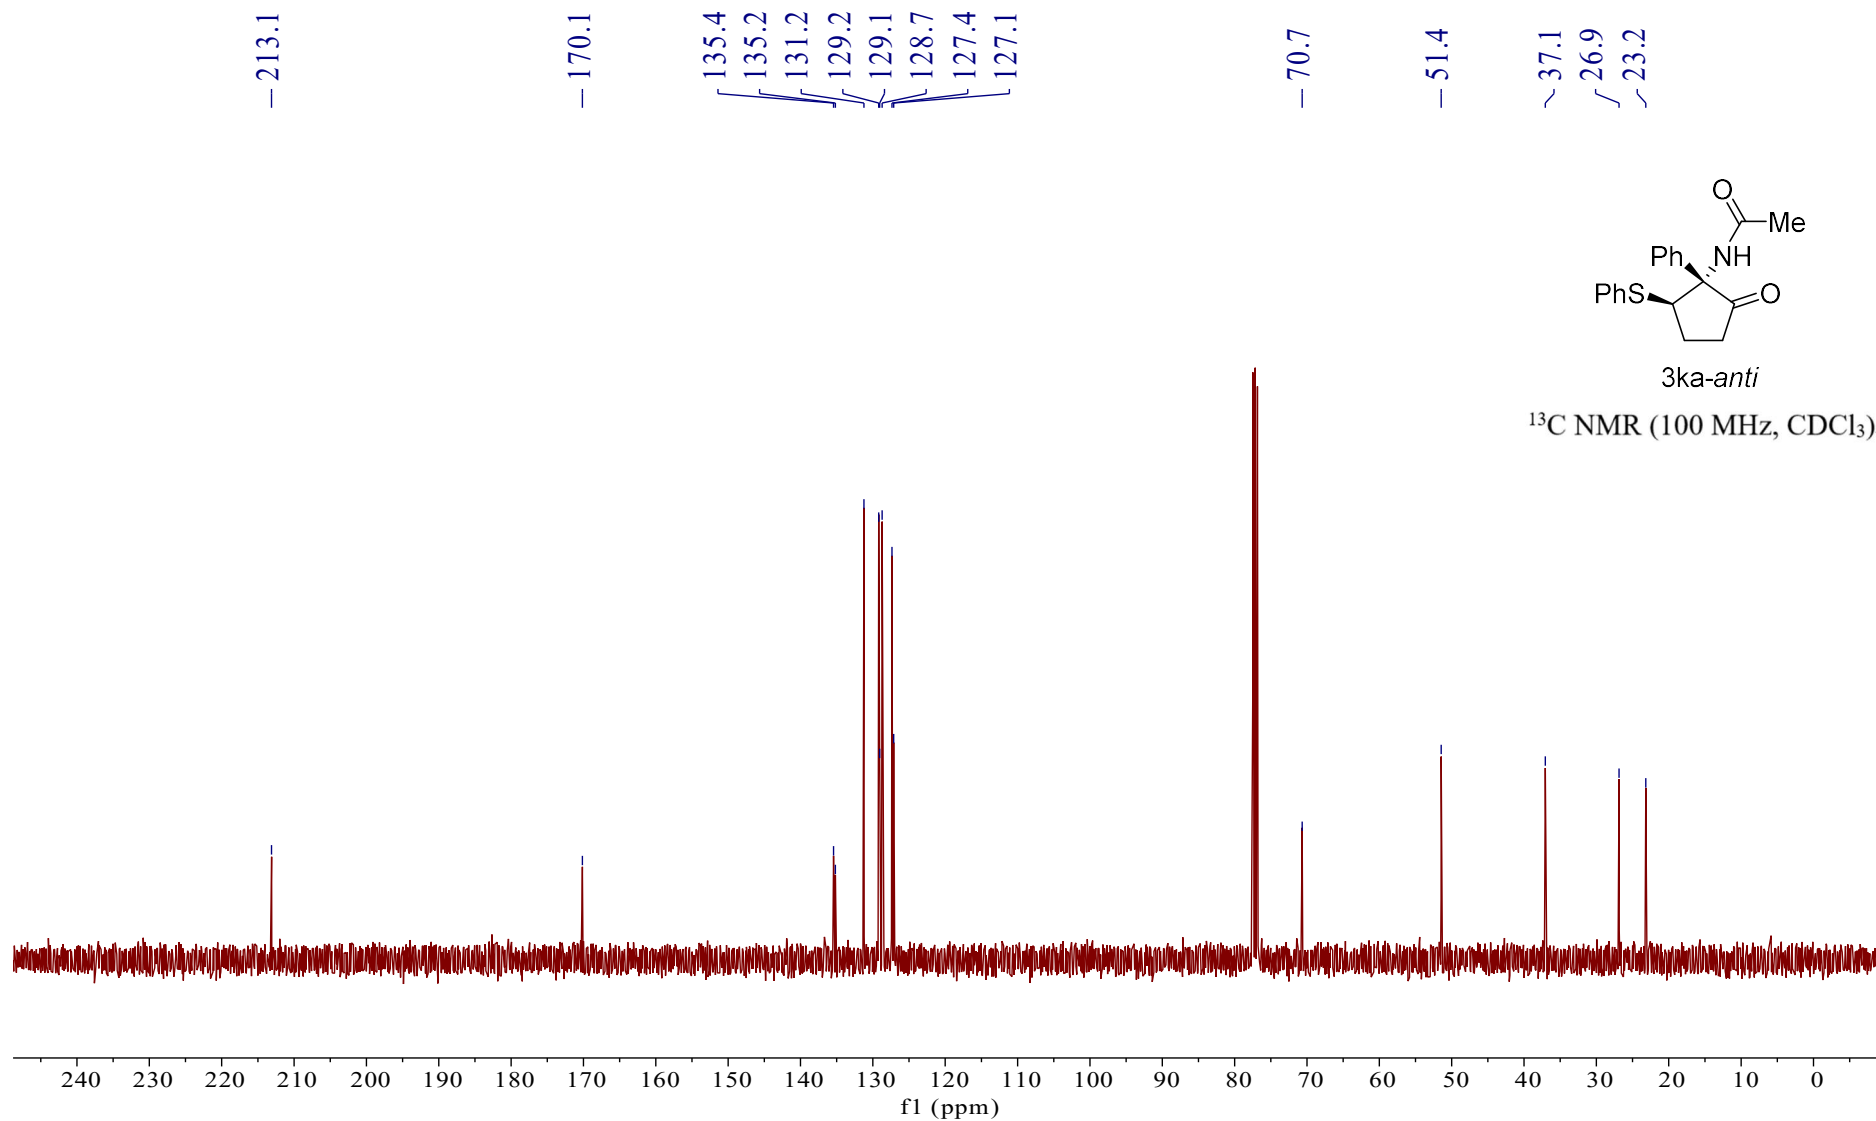

NMR-163

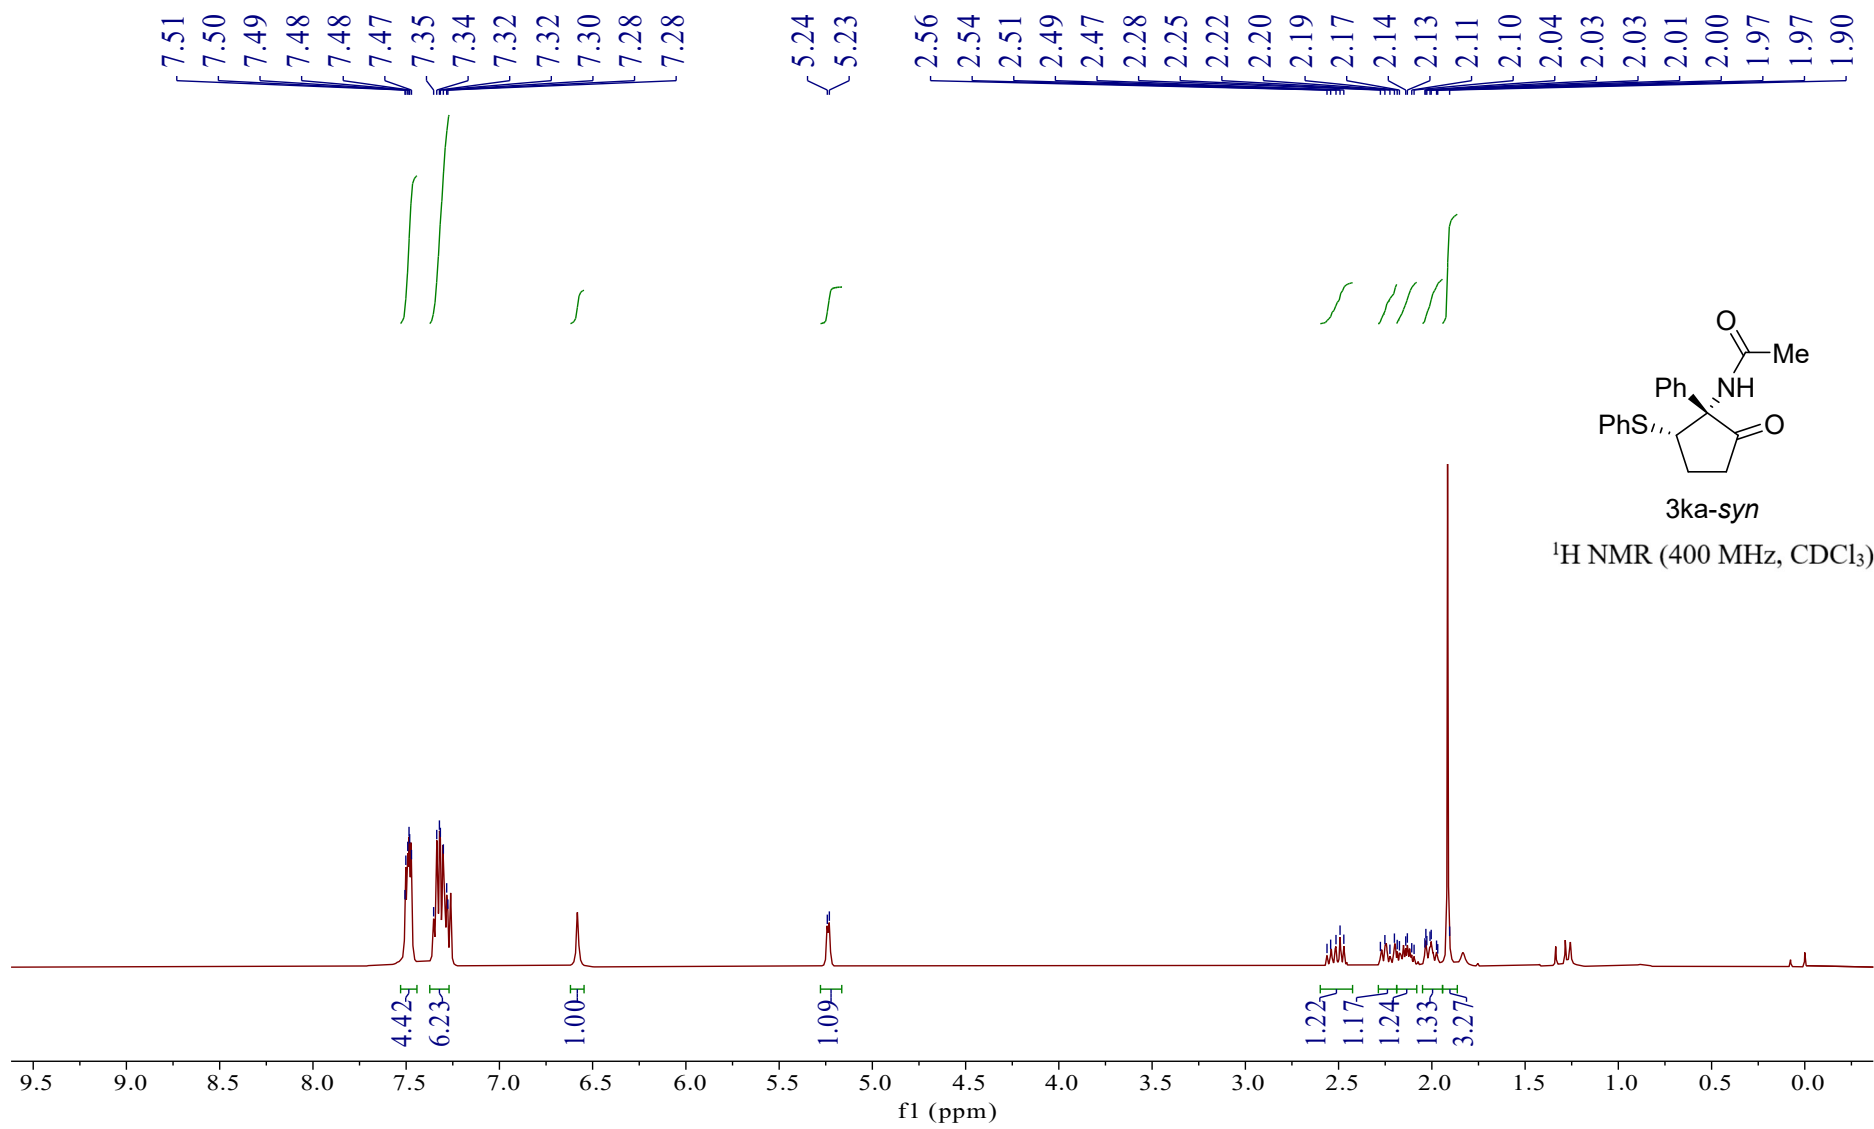



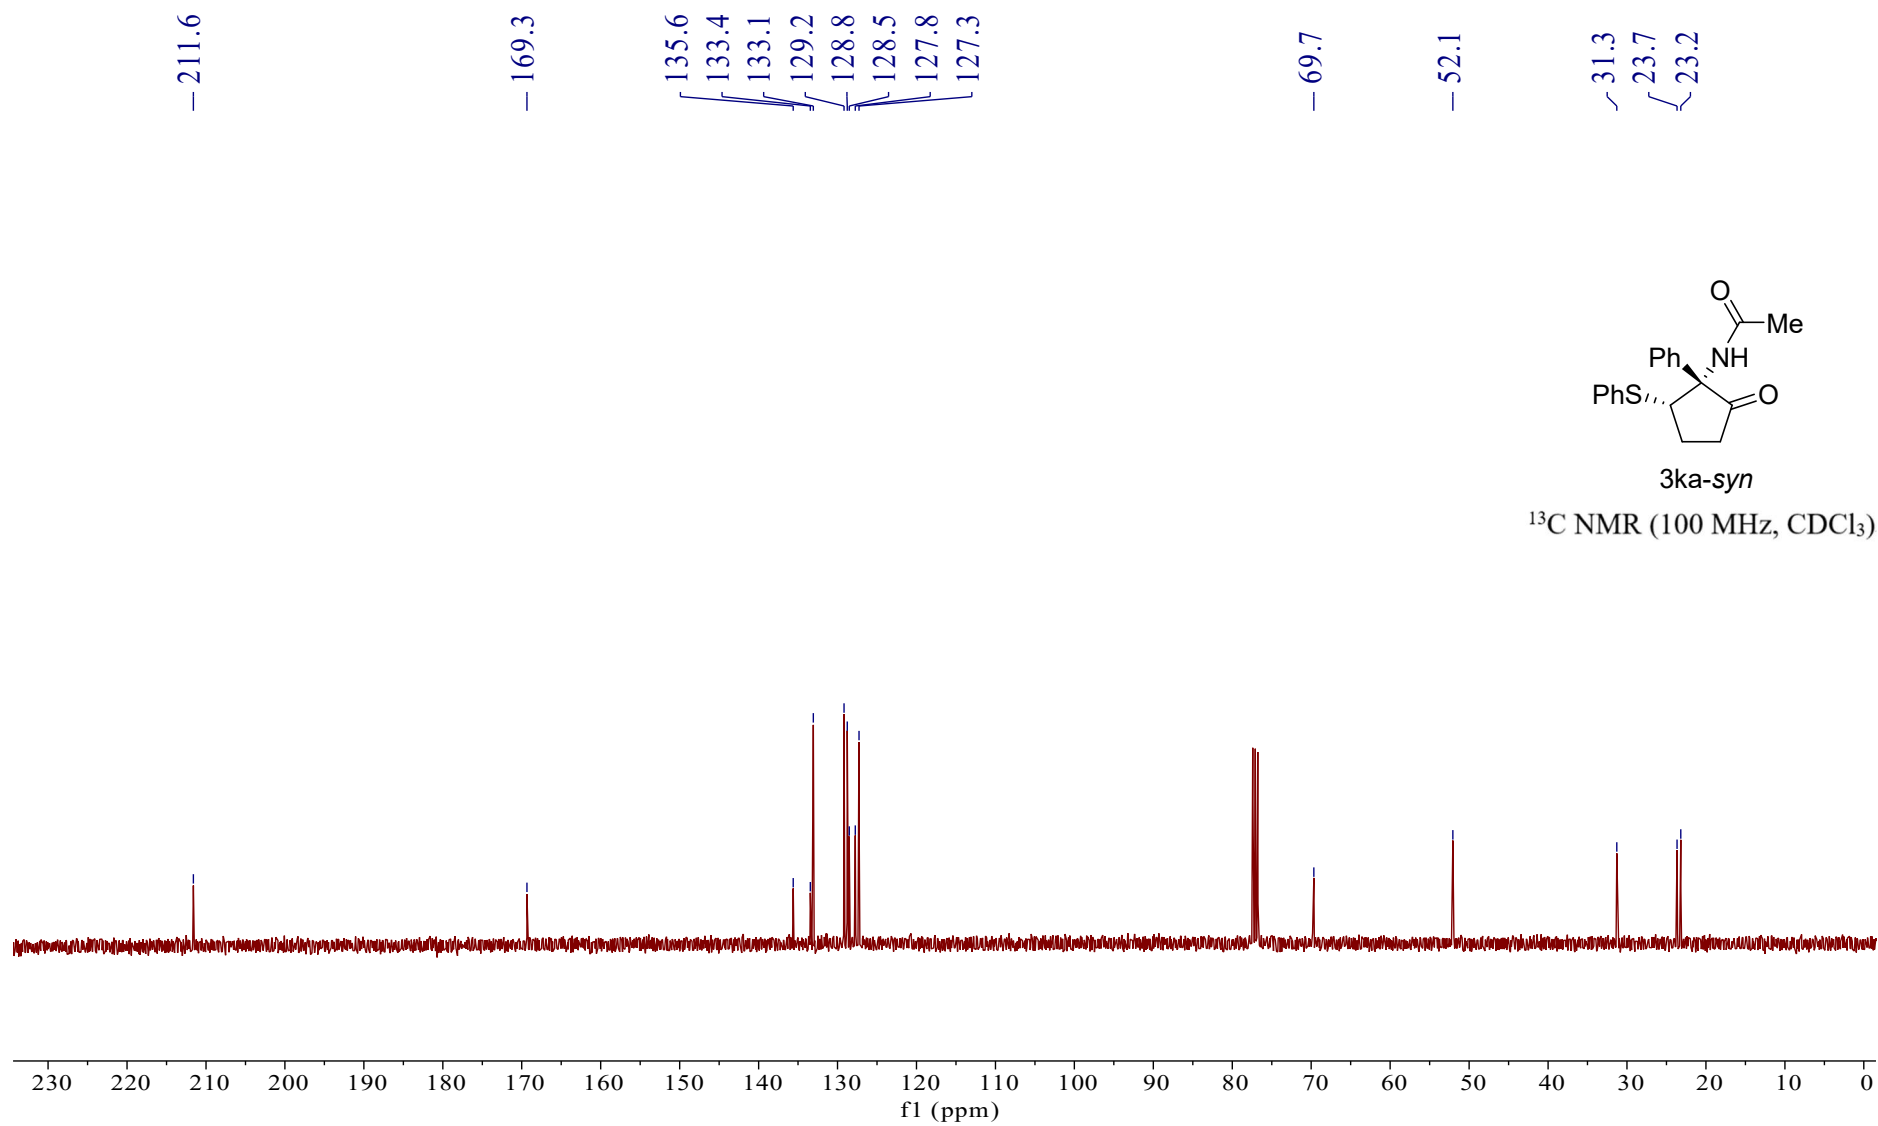

NMR-165

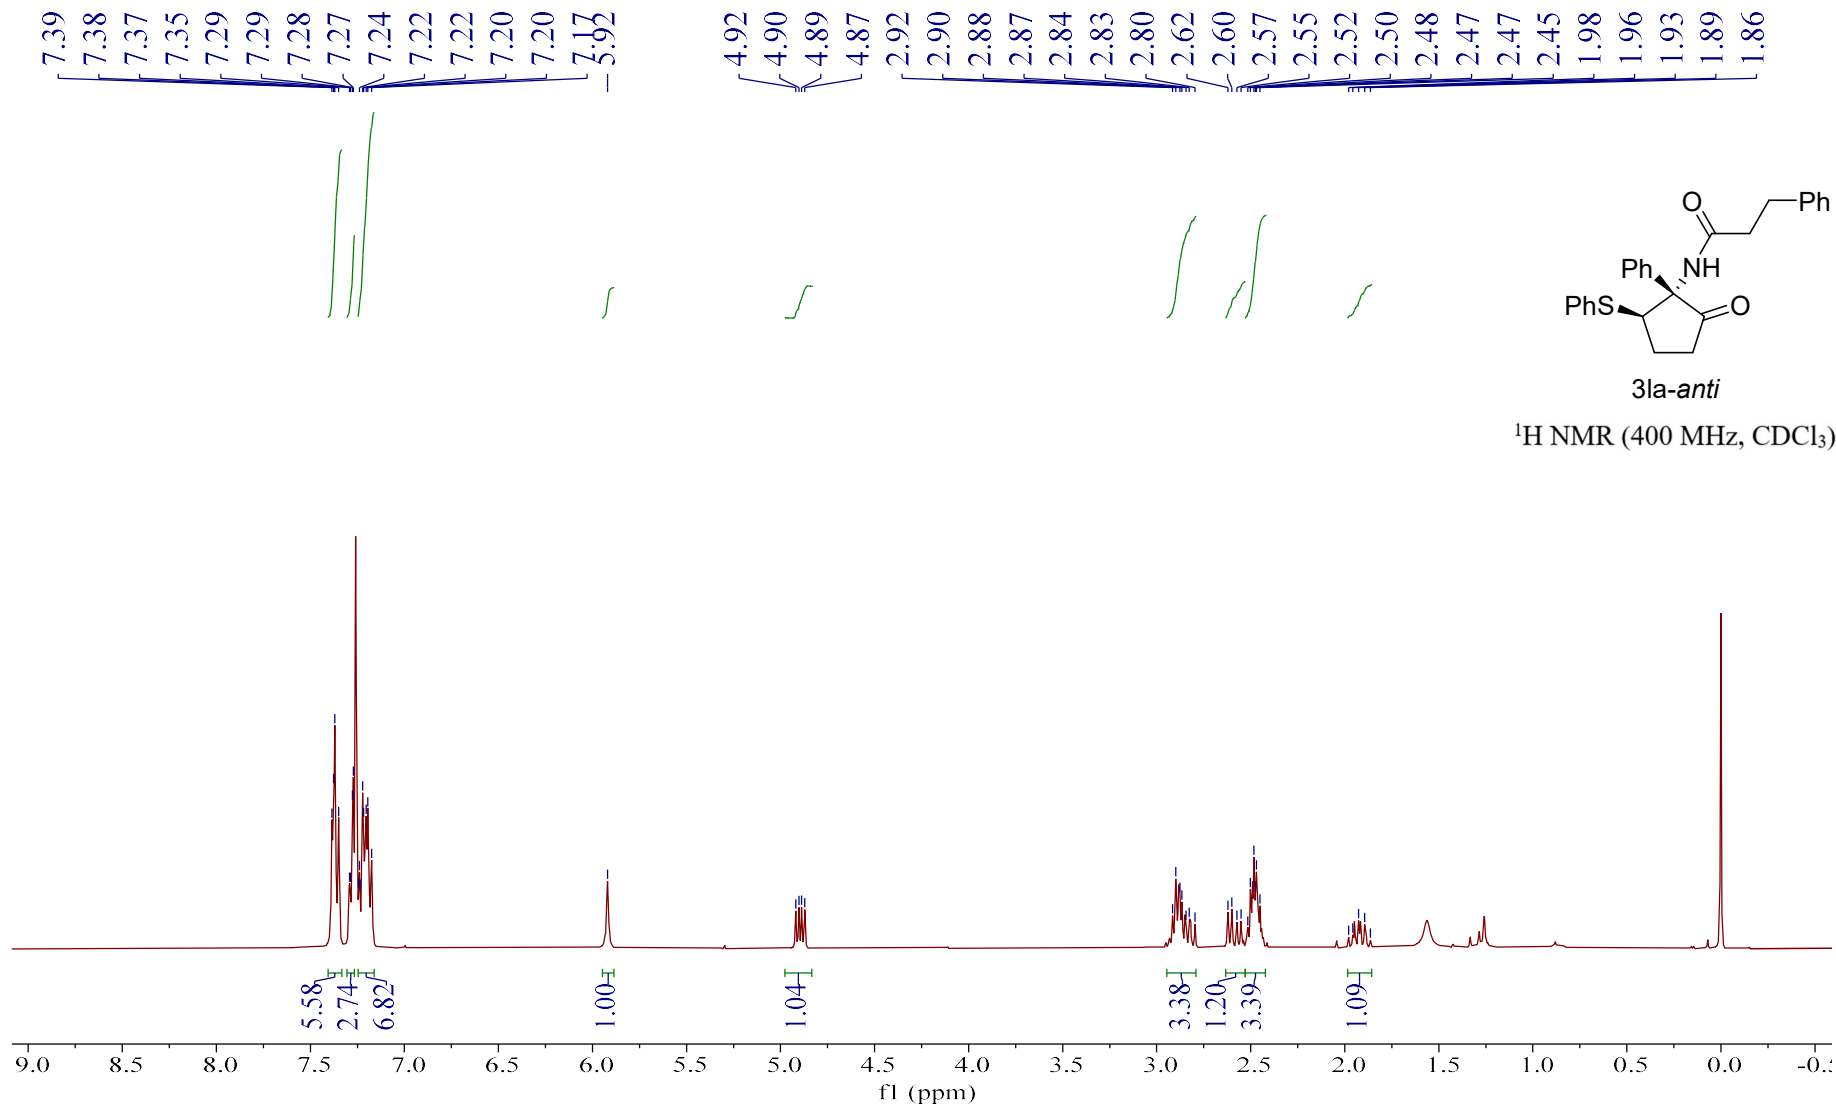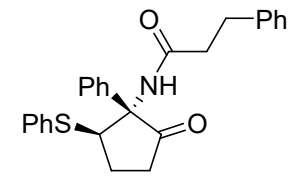

3la-anti

<sup>1</sup>H NMR (400 MHz, CDCl<sub>3</sub>)

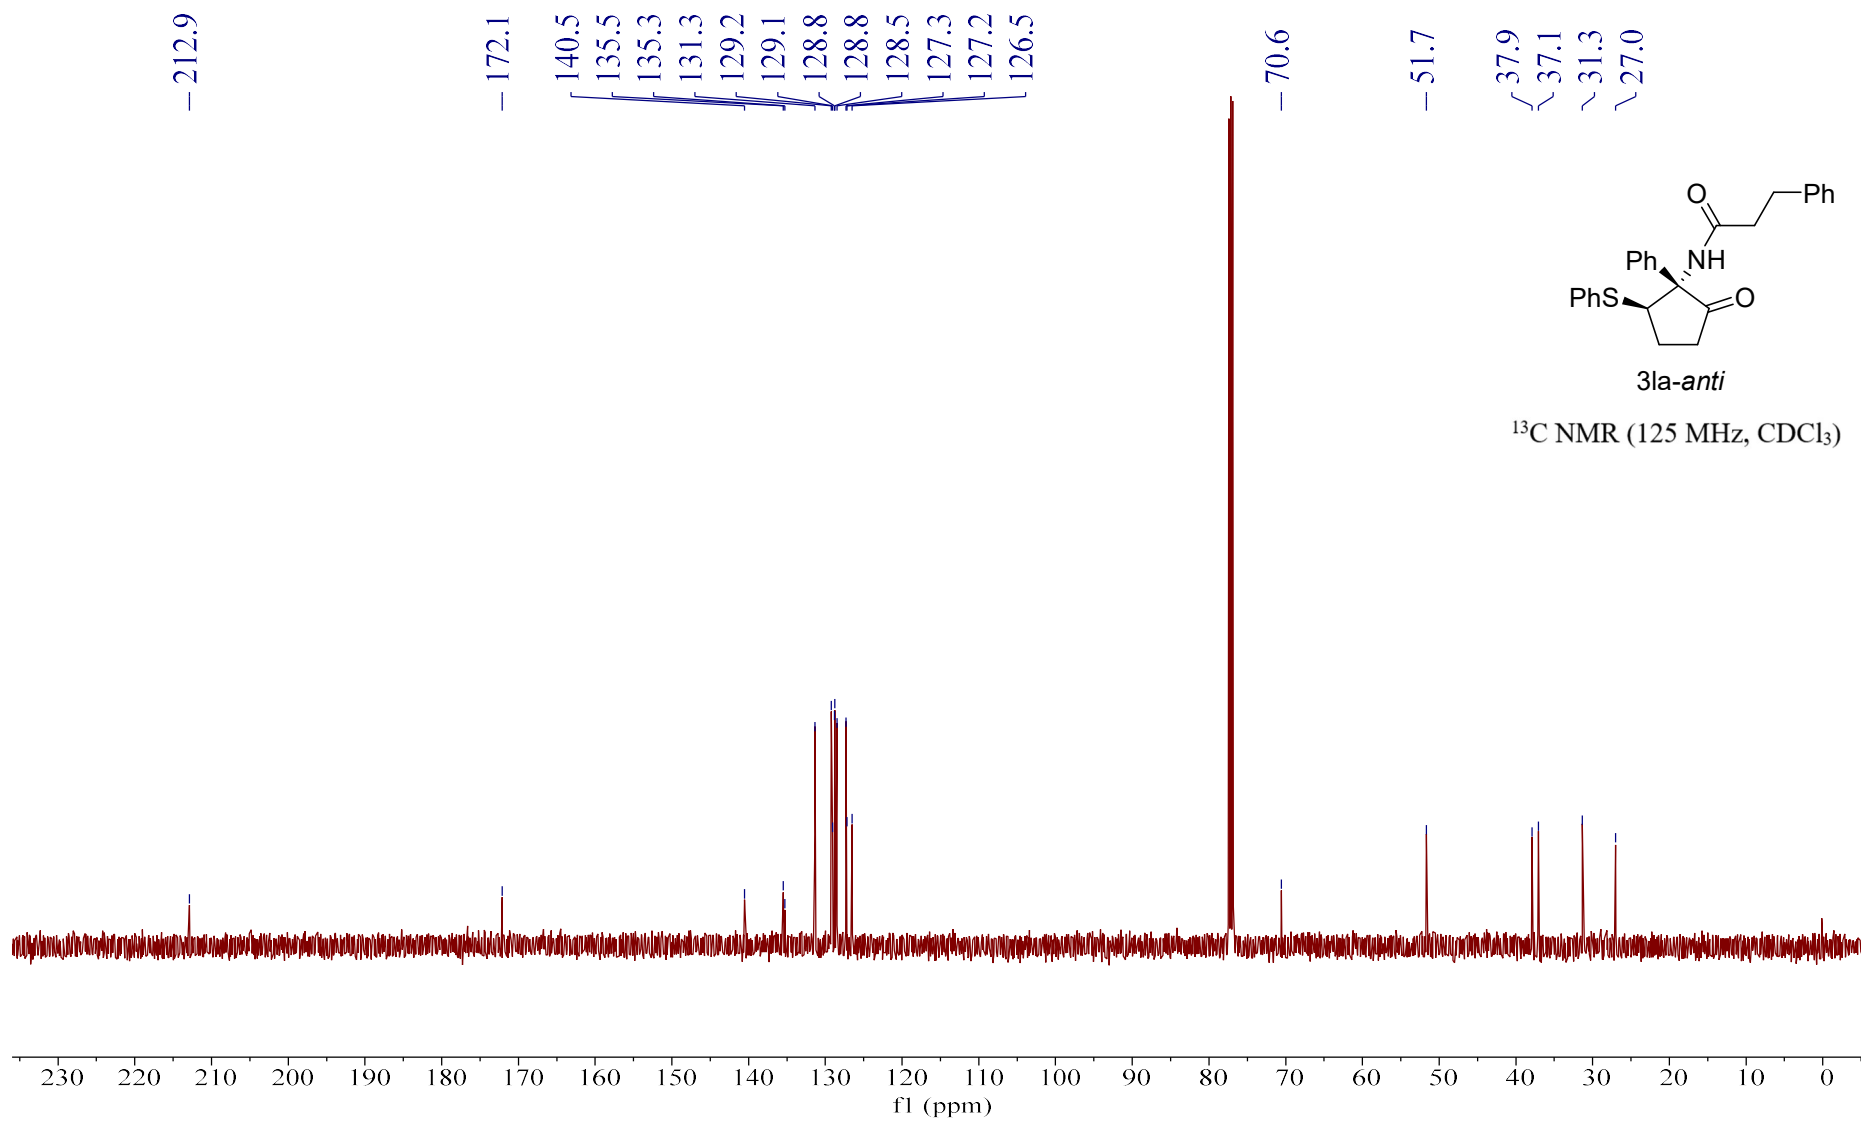

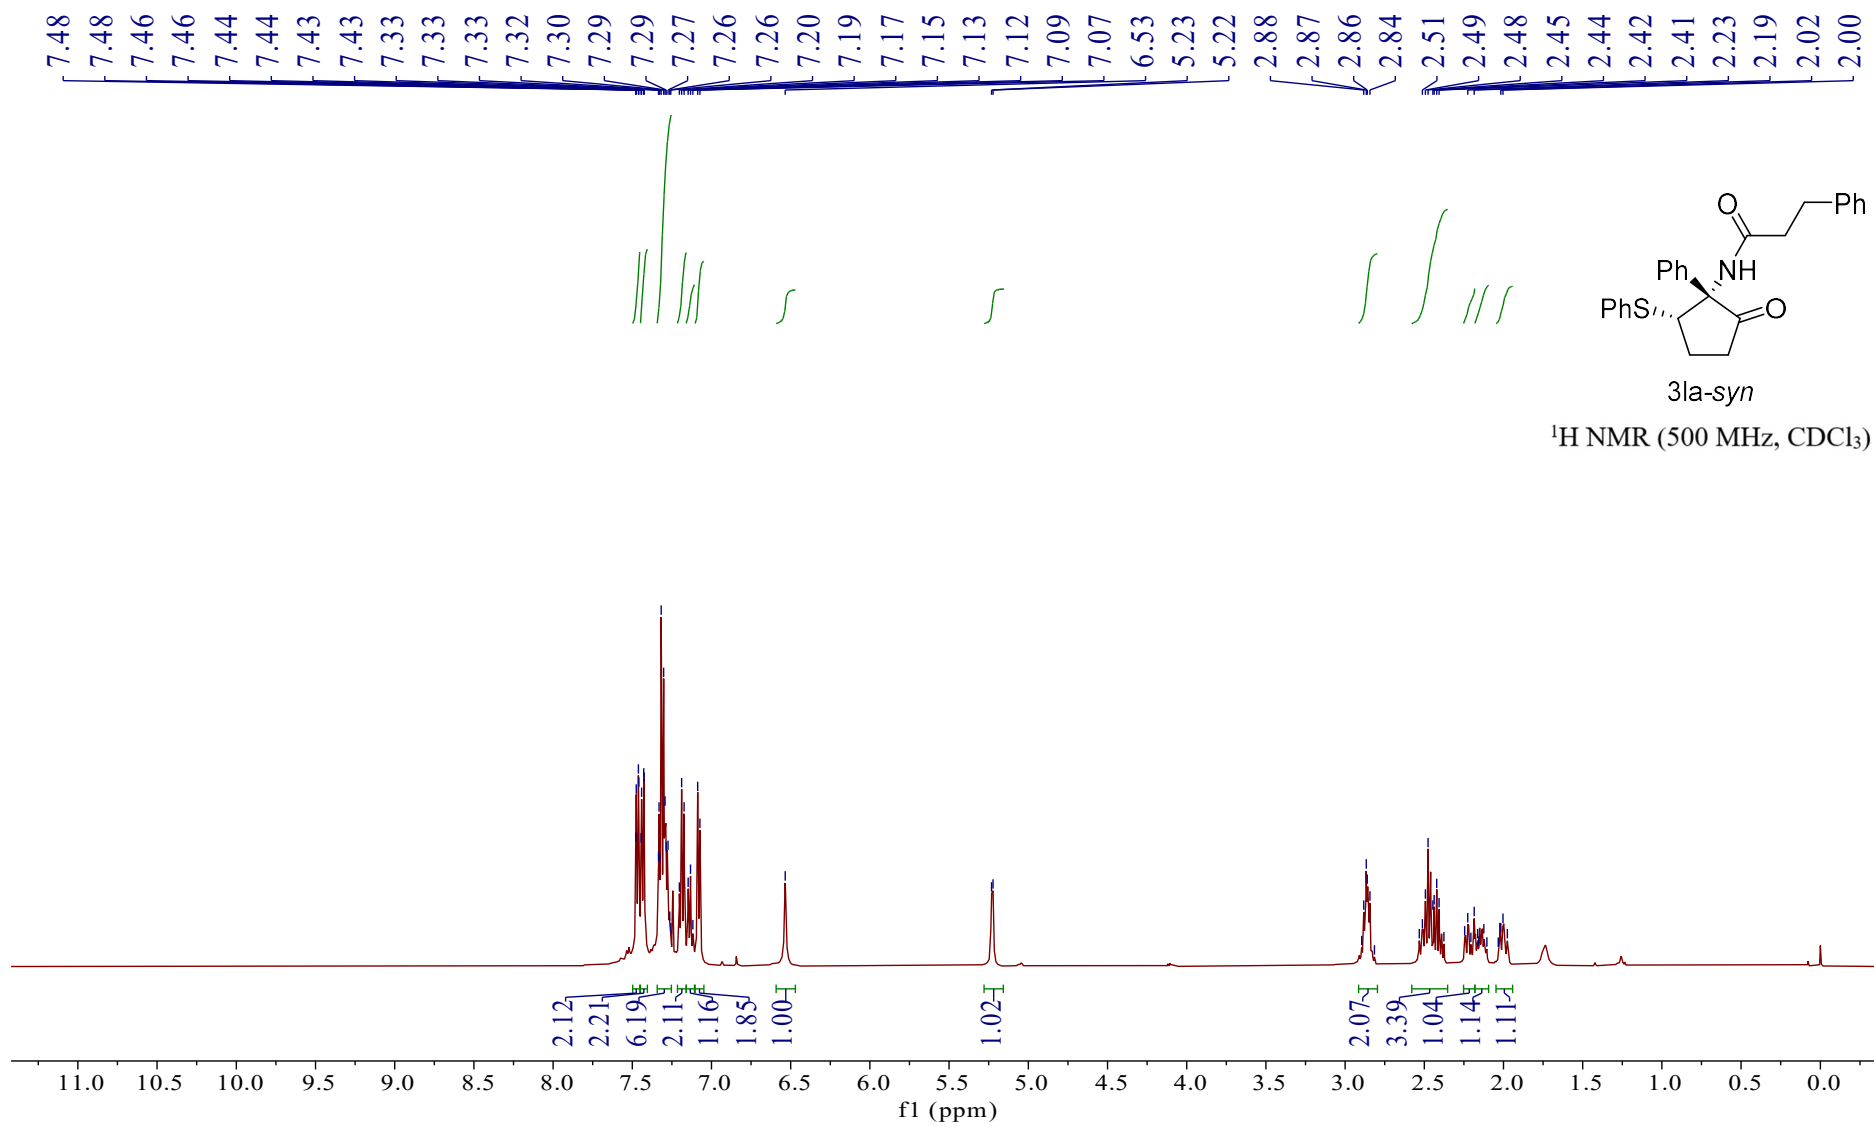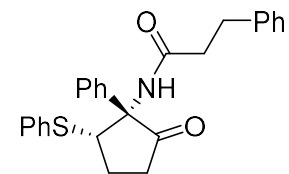

3la-syn

<sup>1</sup>H NMR (500 MHz, CDCl<sub>3</sub>)

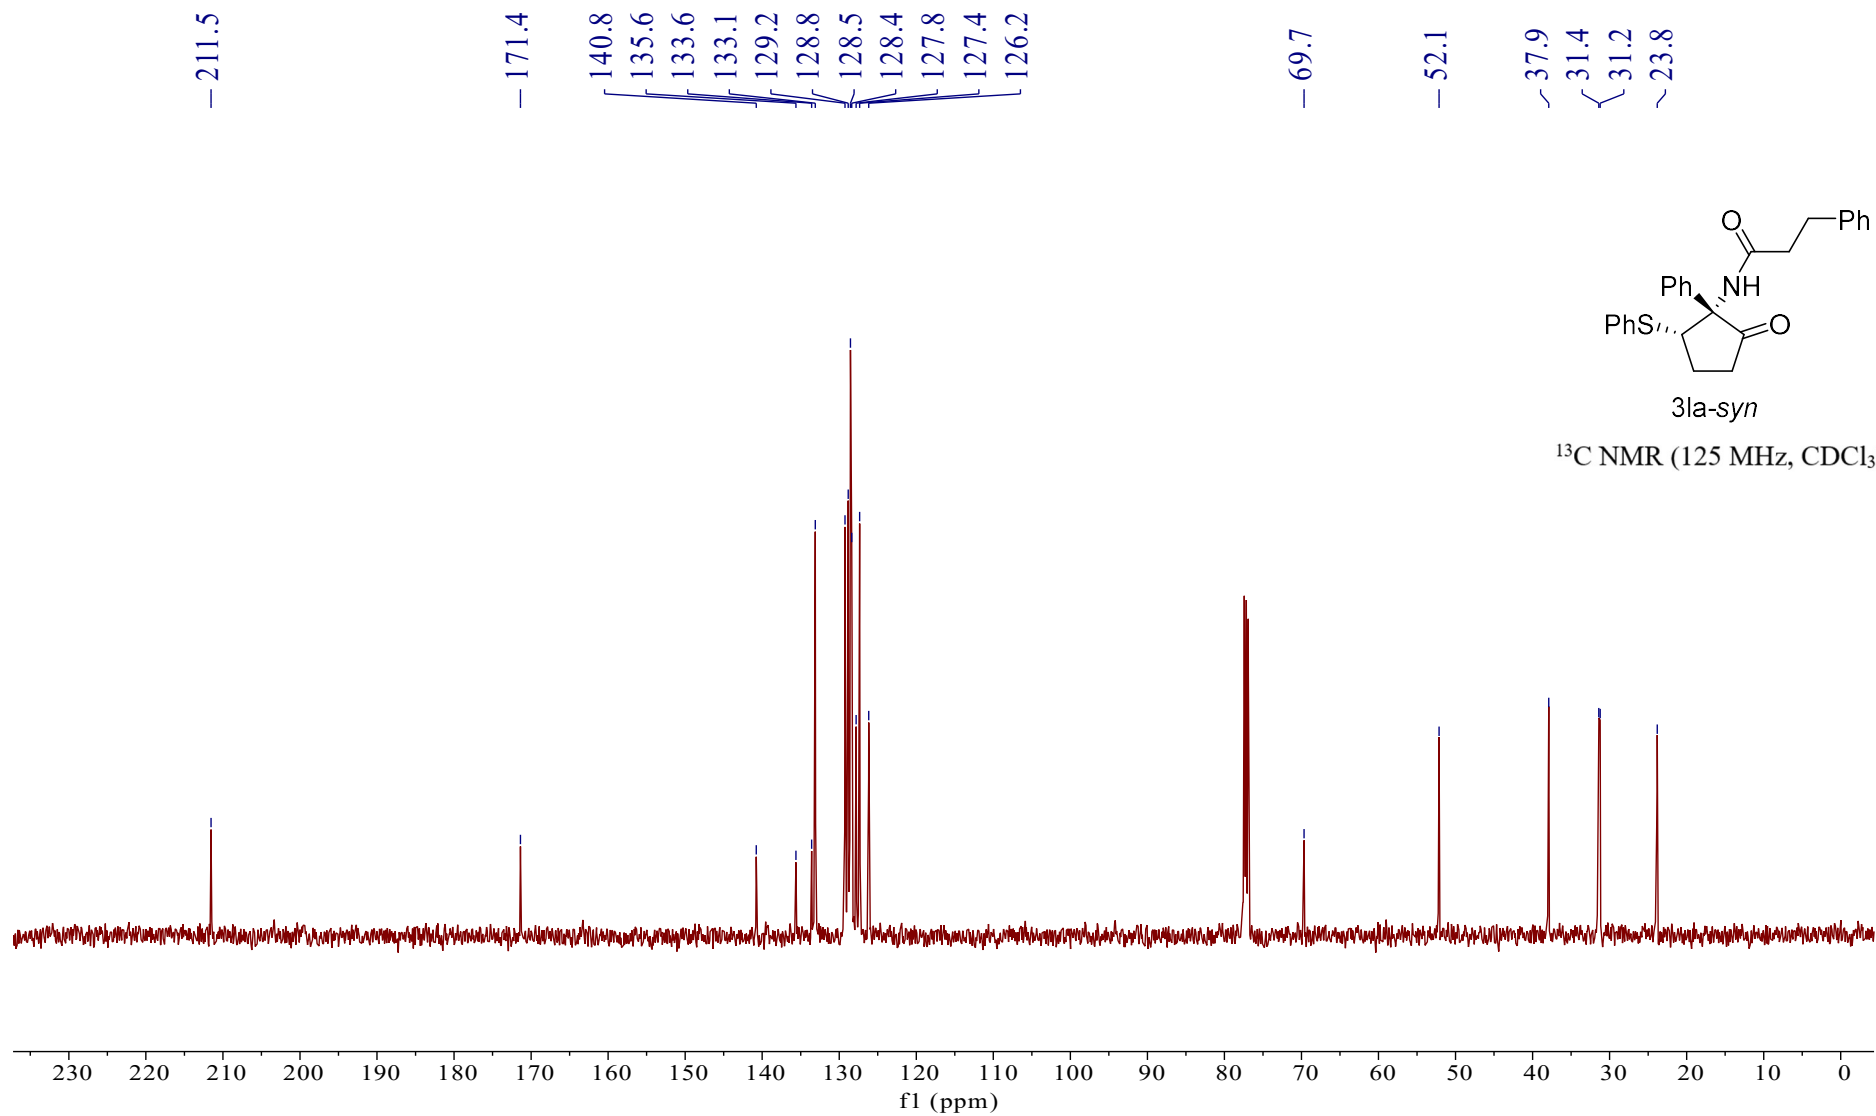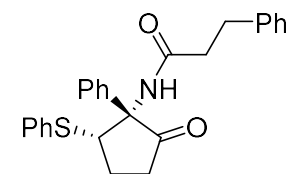

3la-syn

$^{13}\text{C}$  NMR (125 MHz,  $\text{CDCl}_3$ )

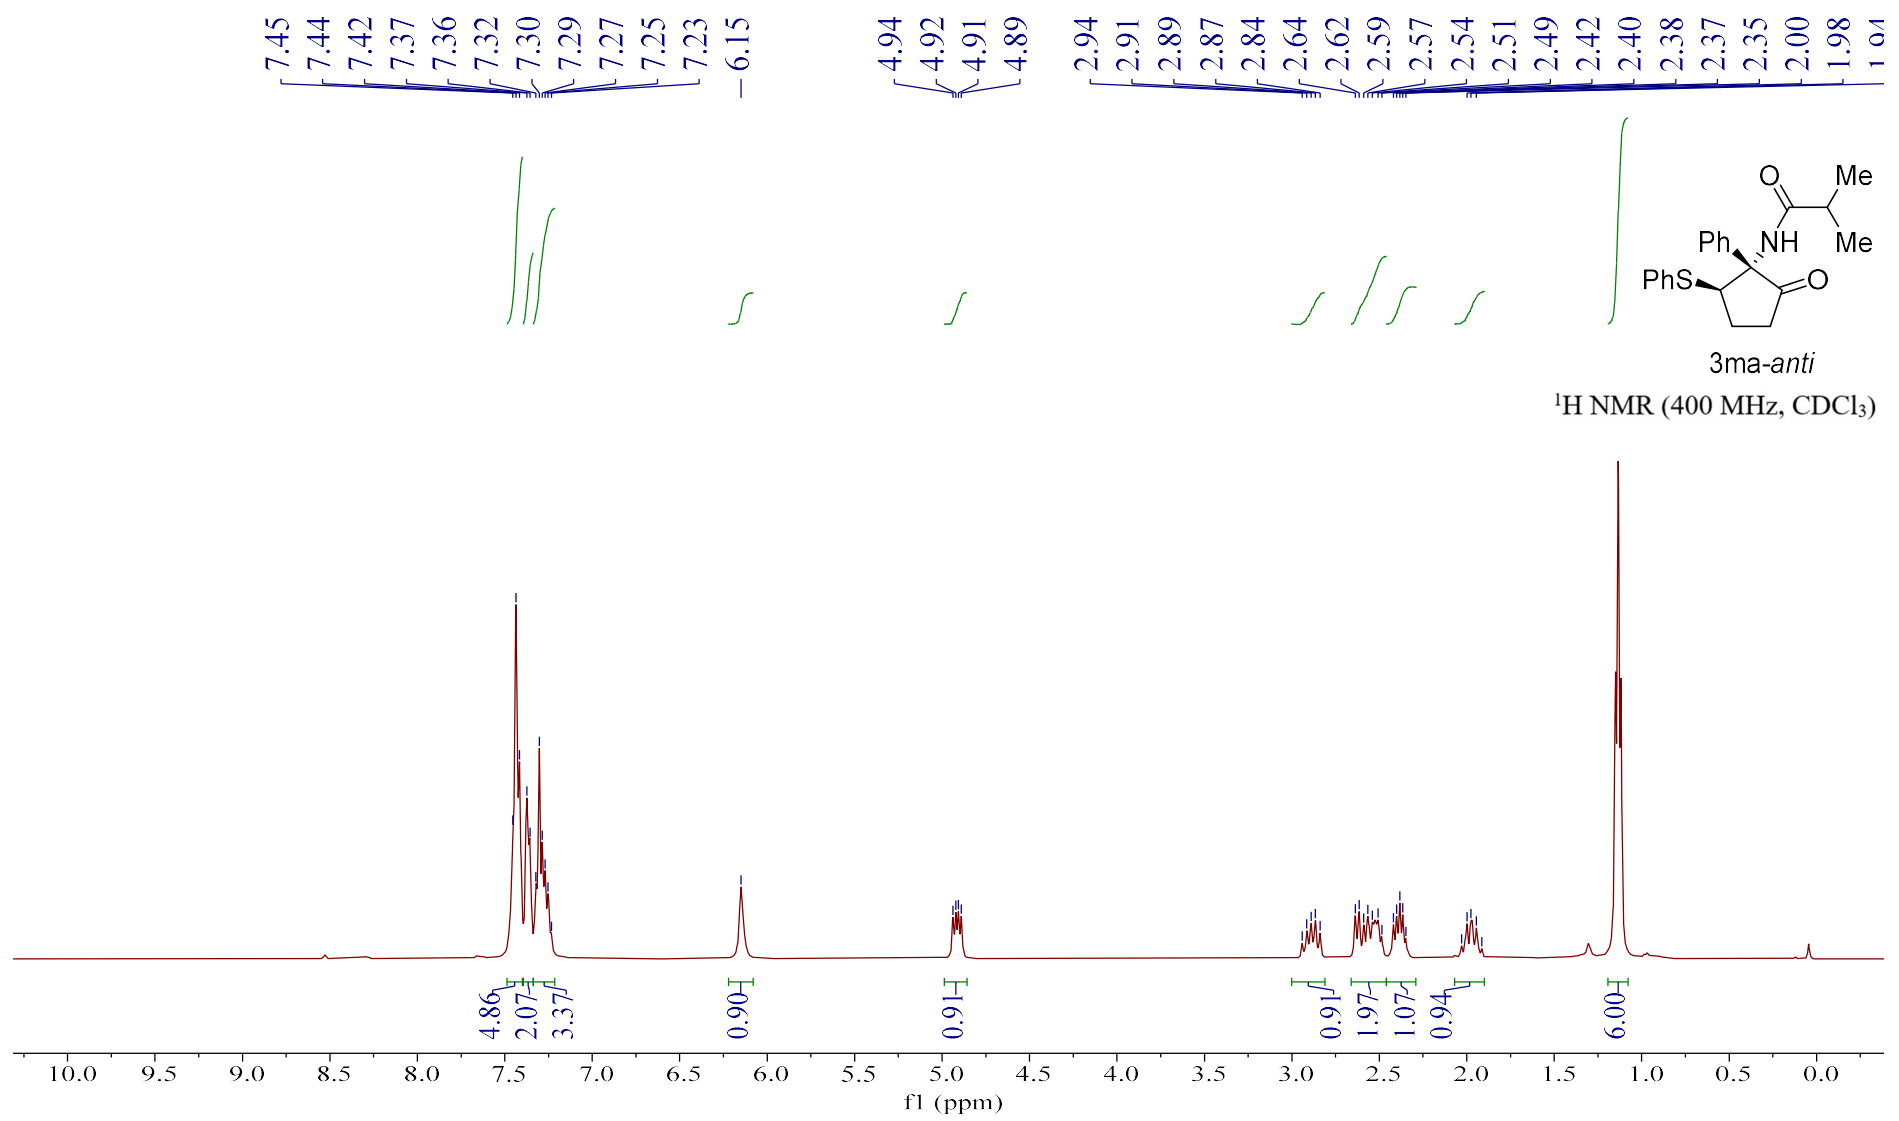

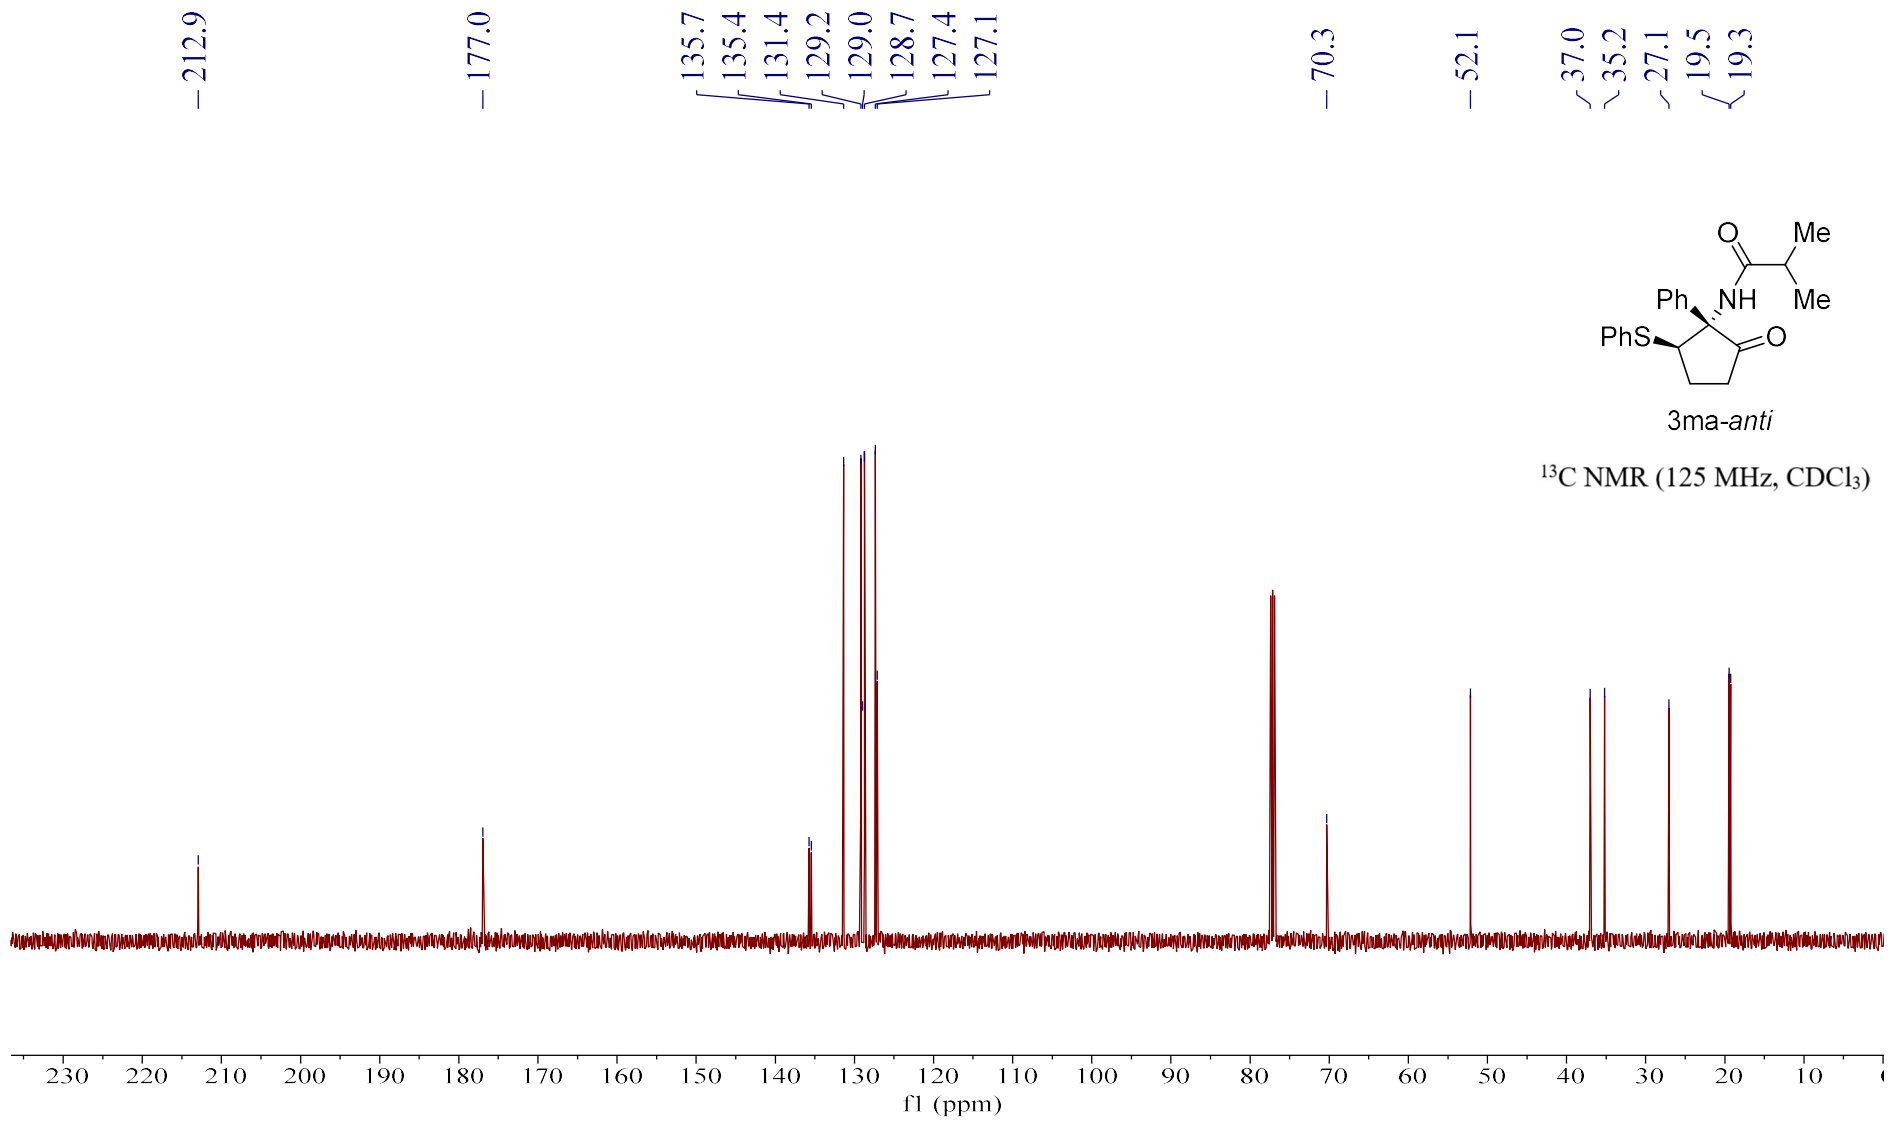

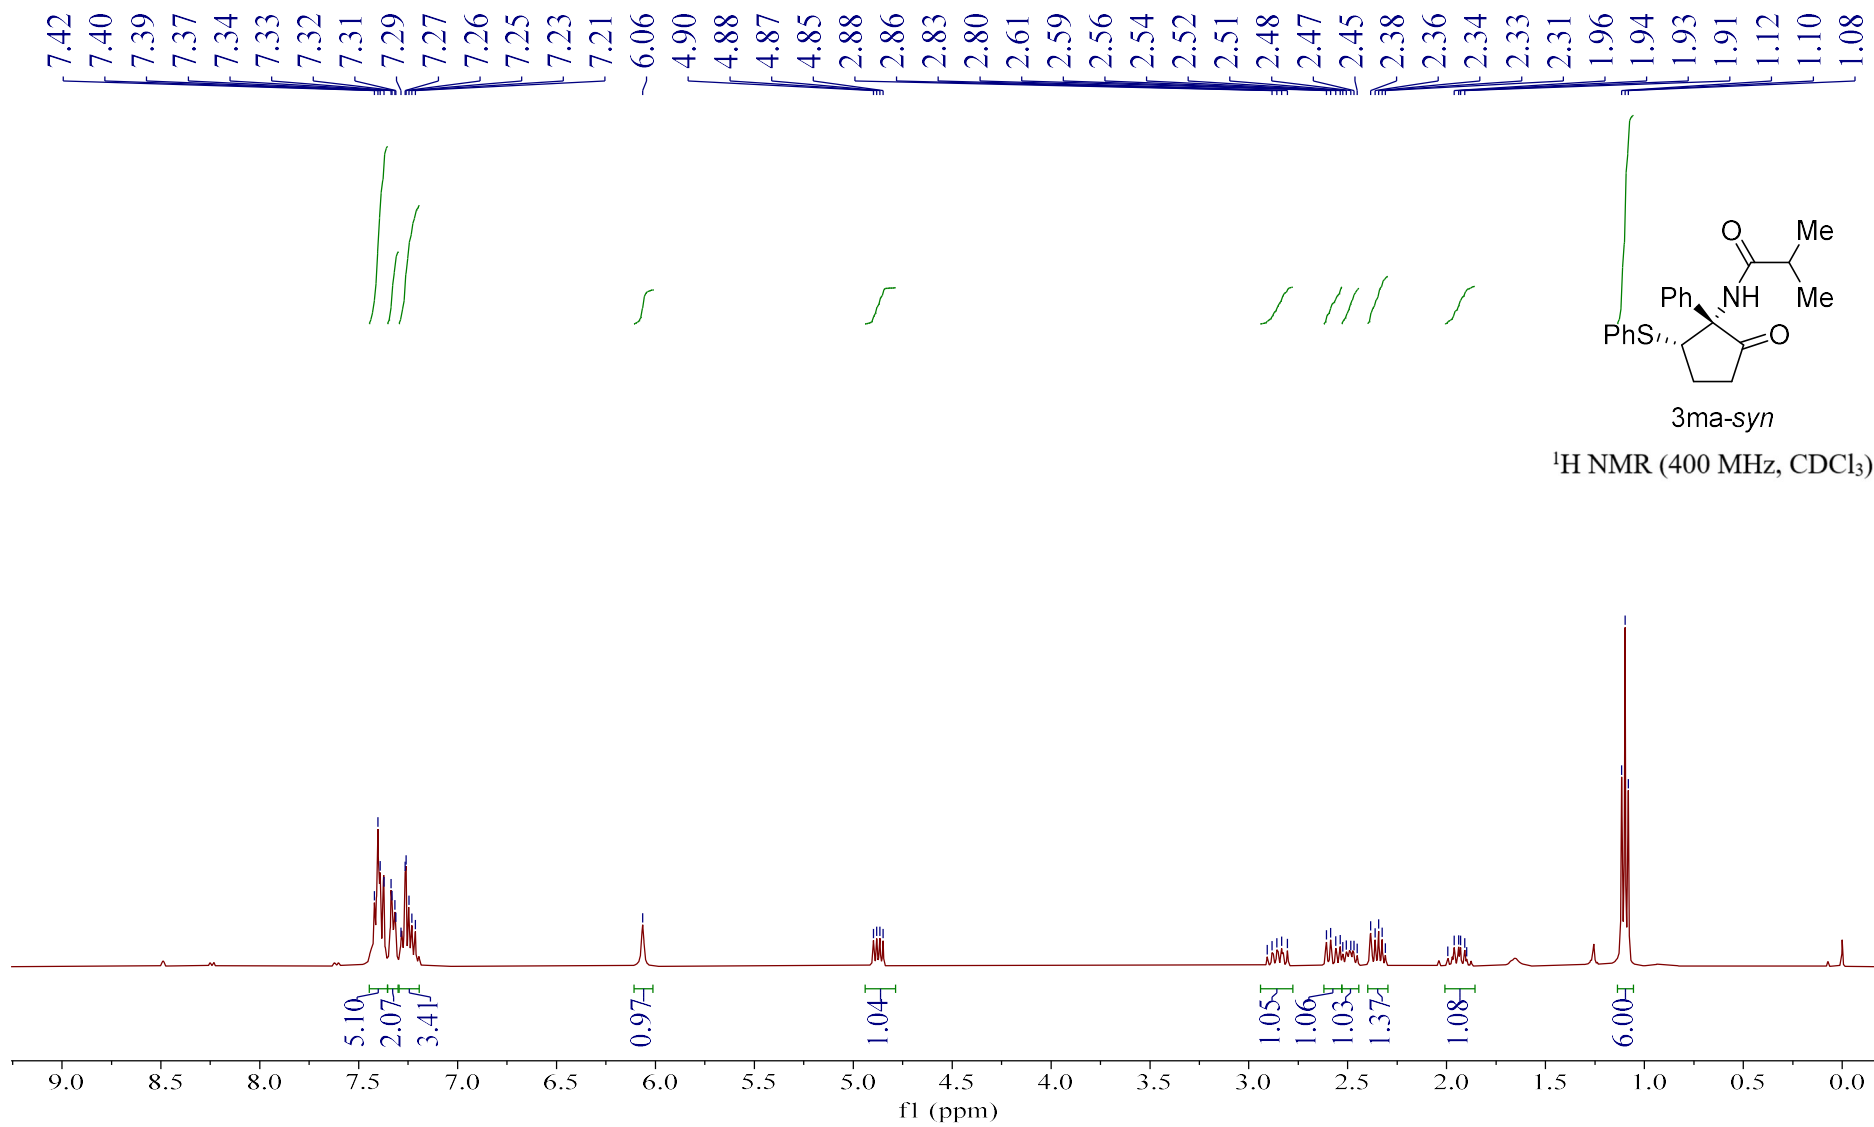



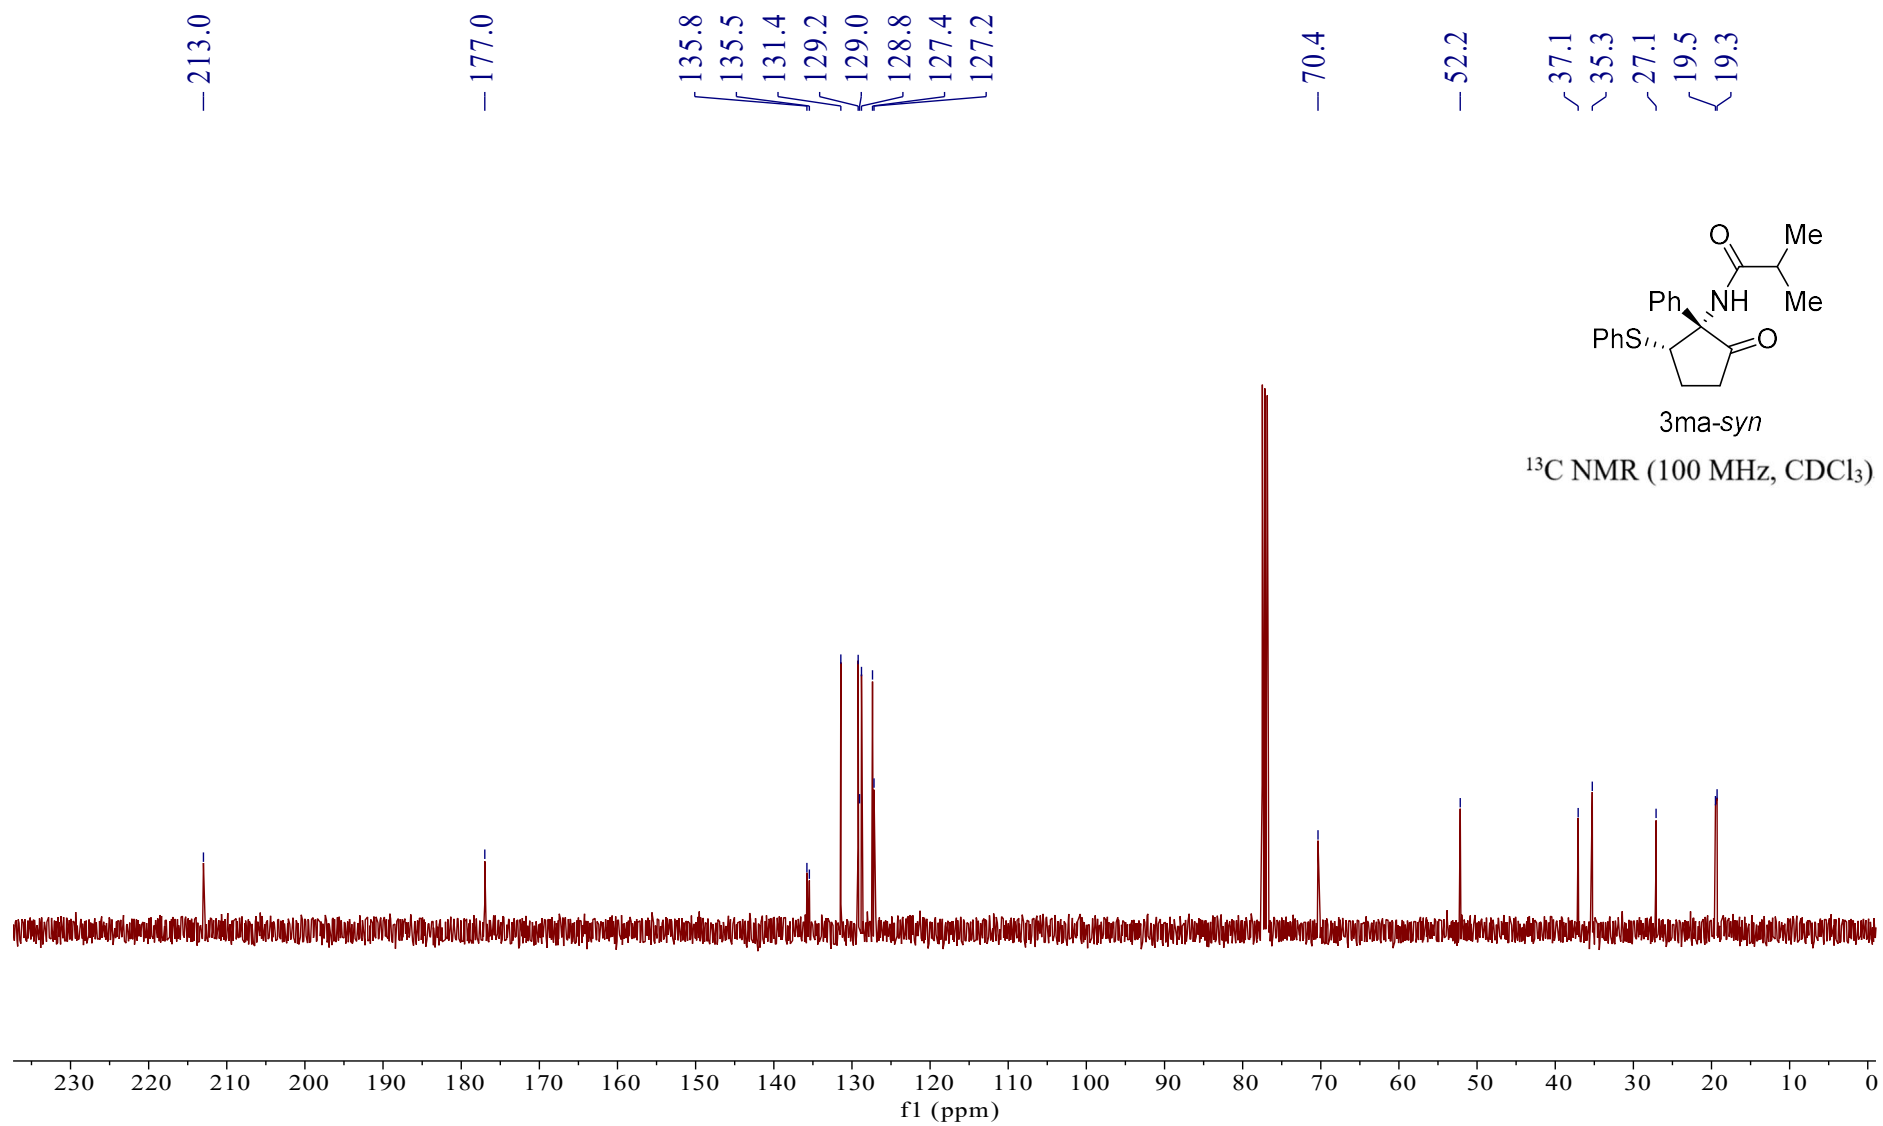

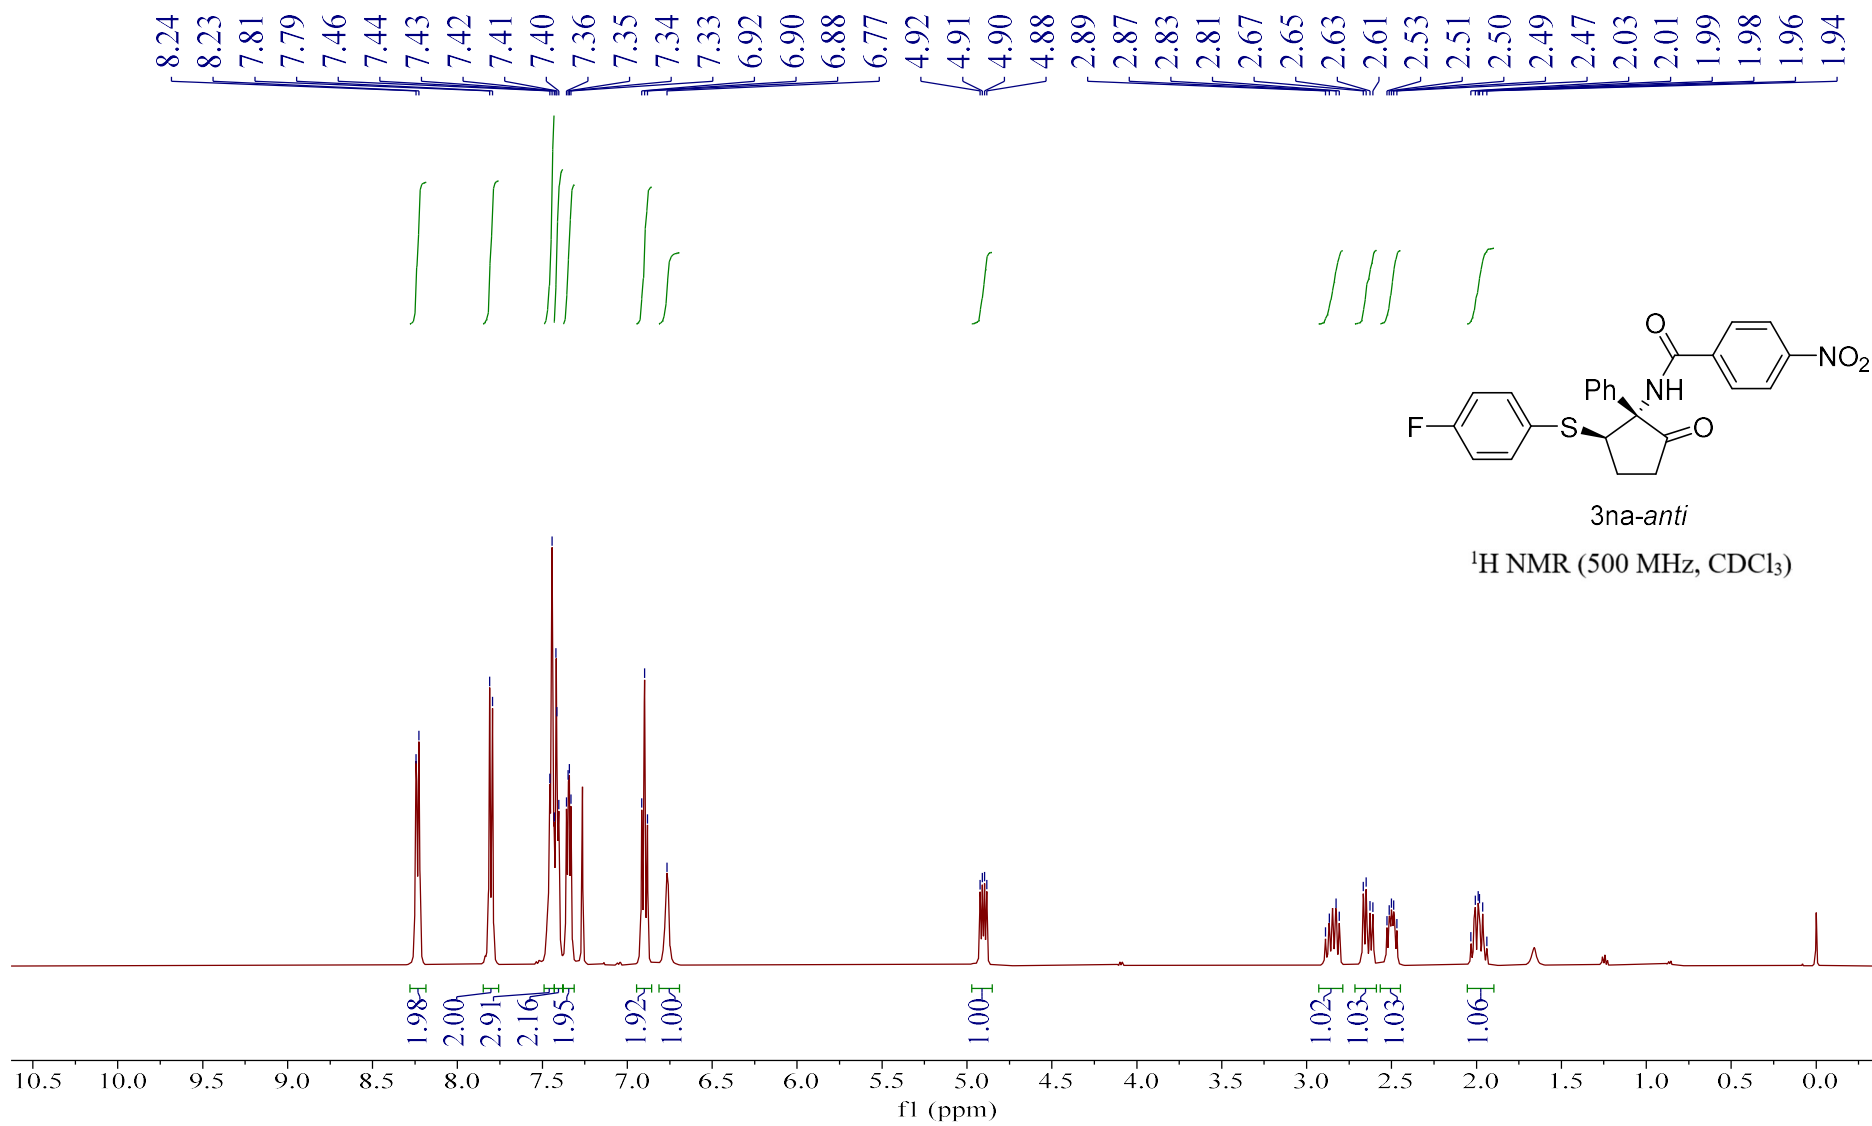

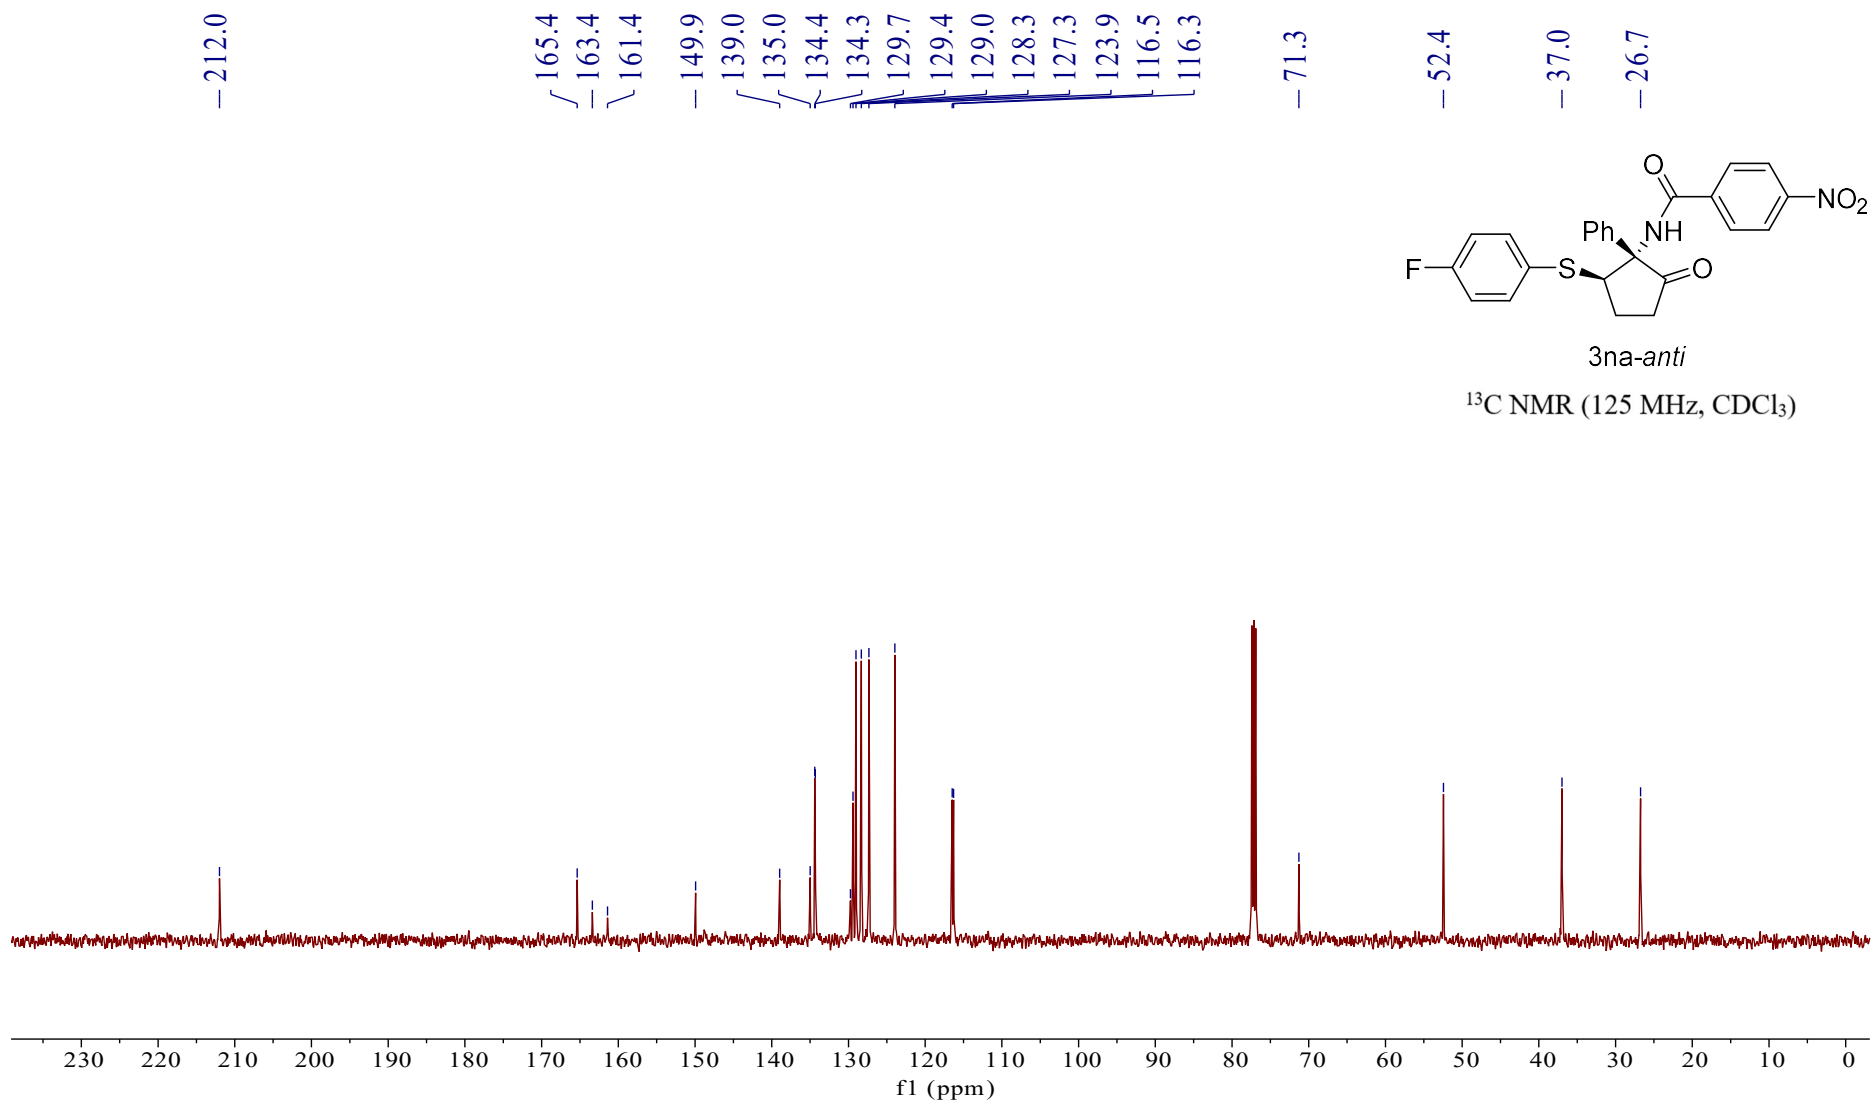

NMR-175

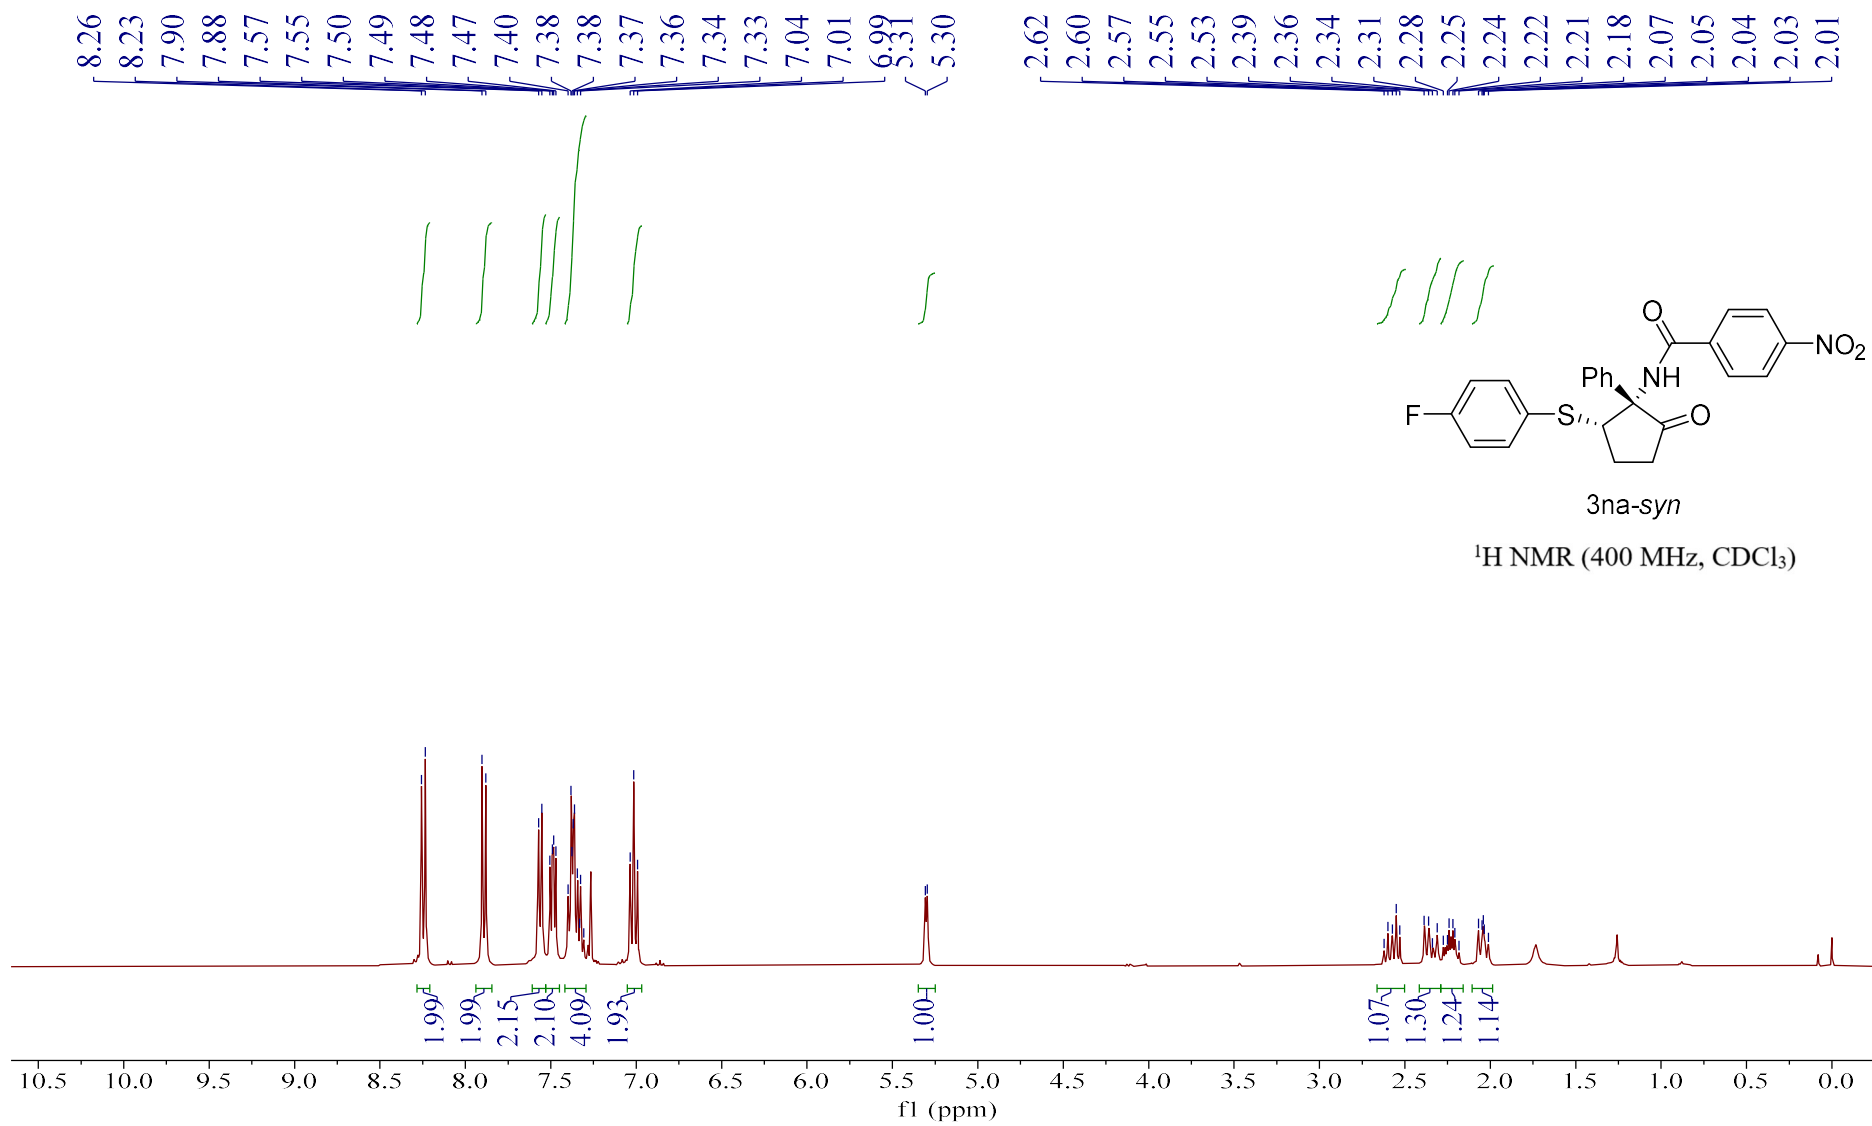

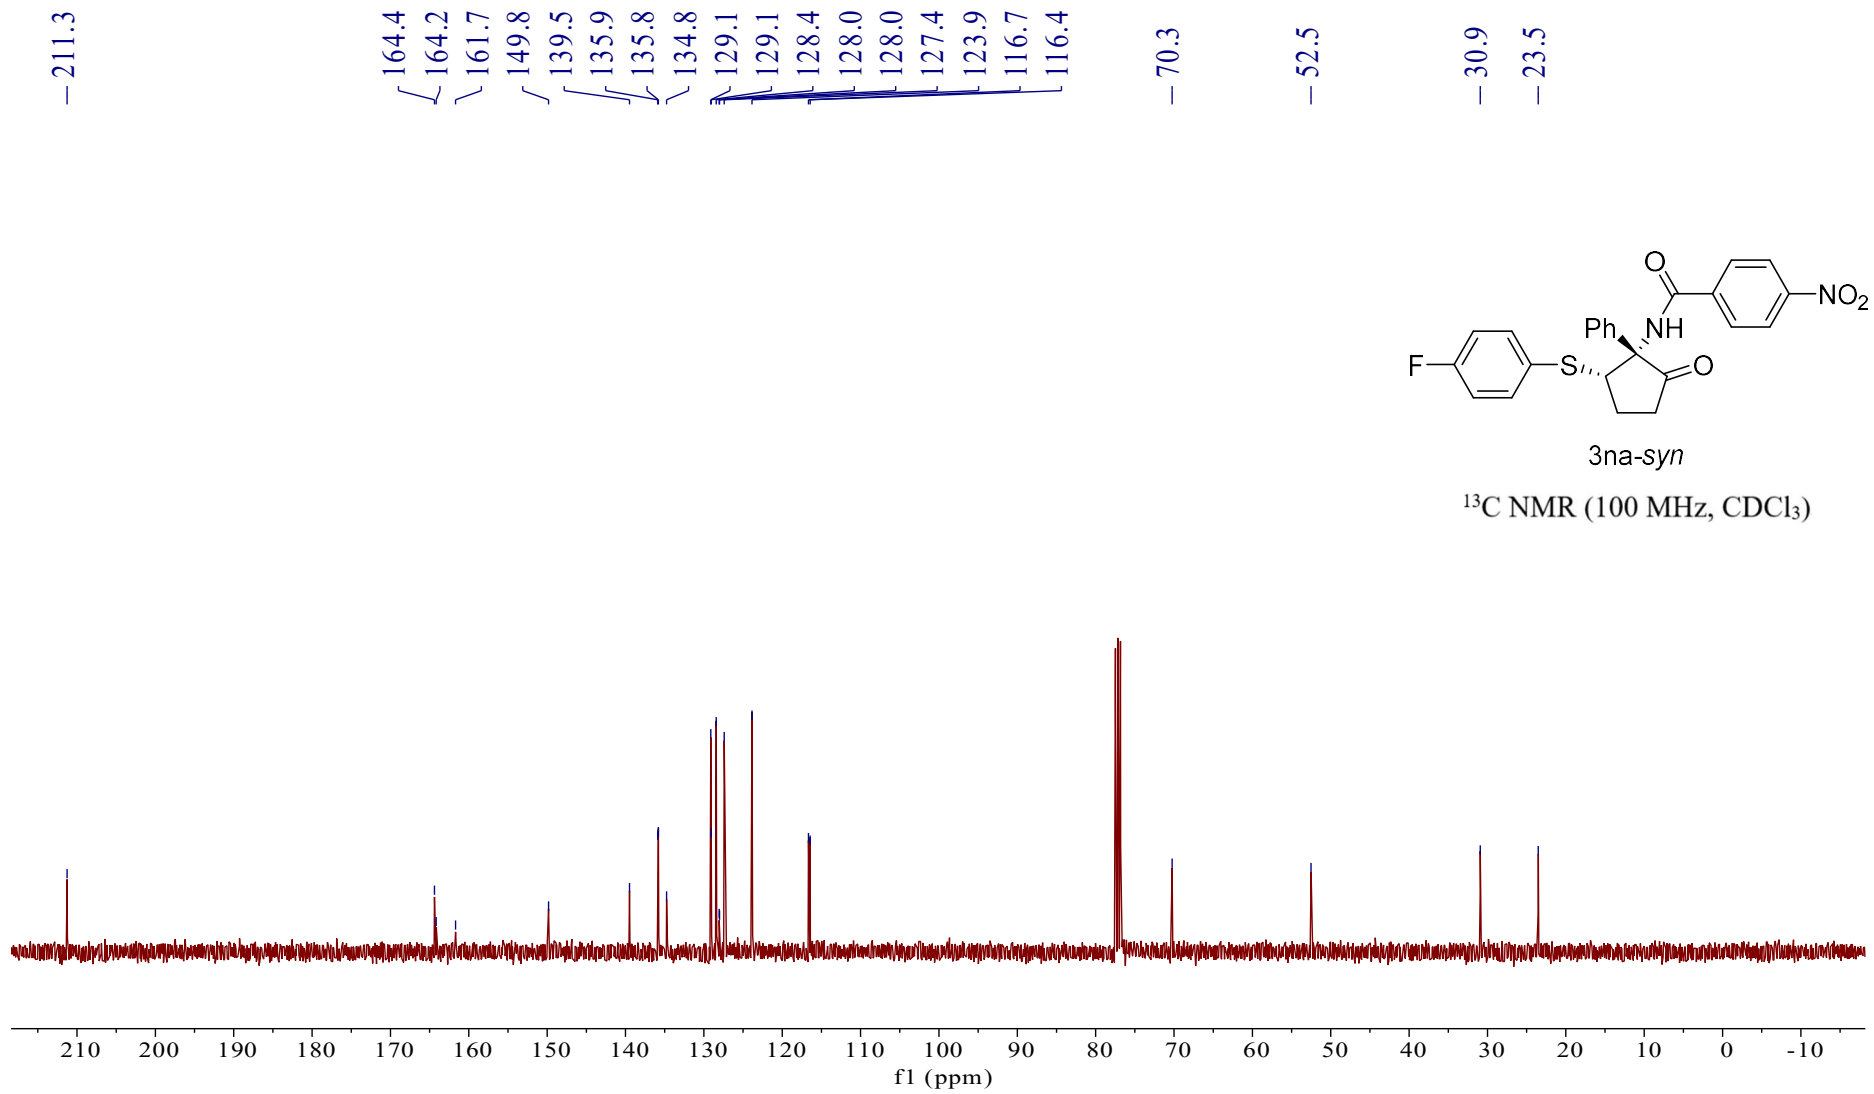



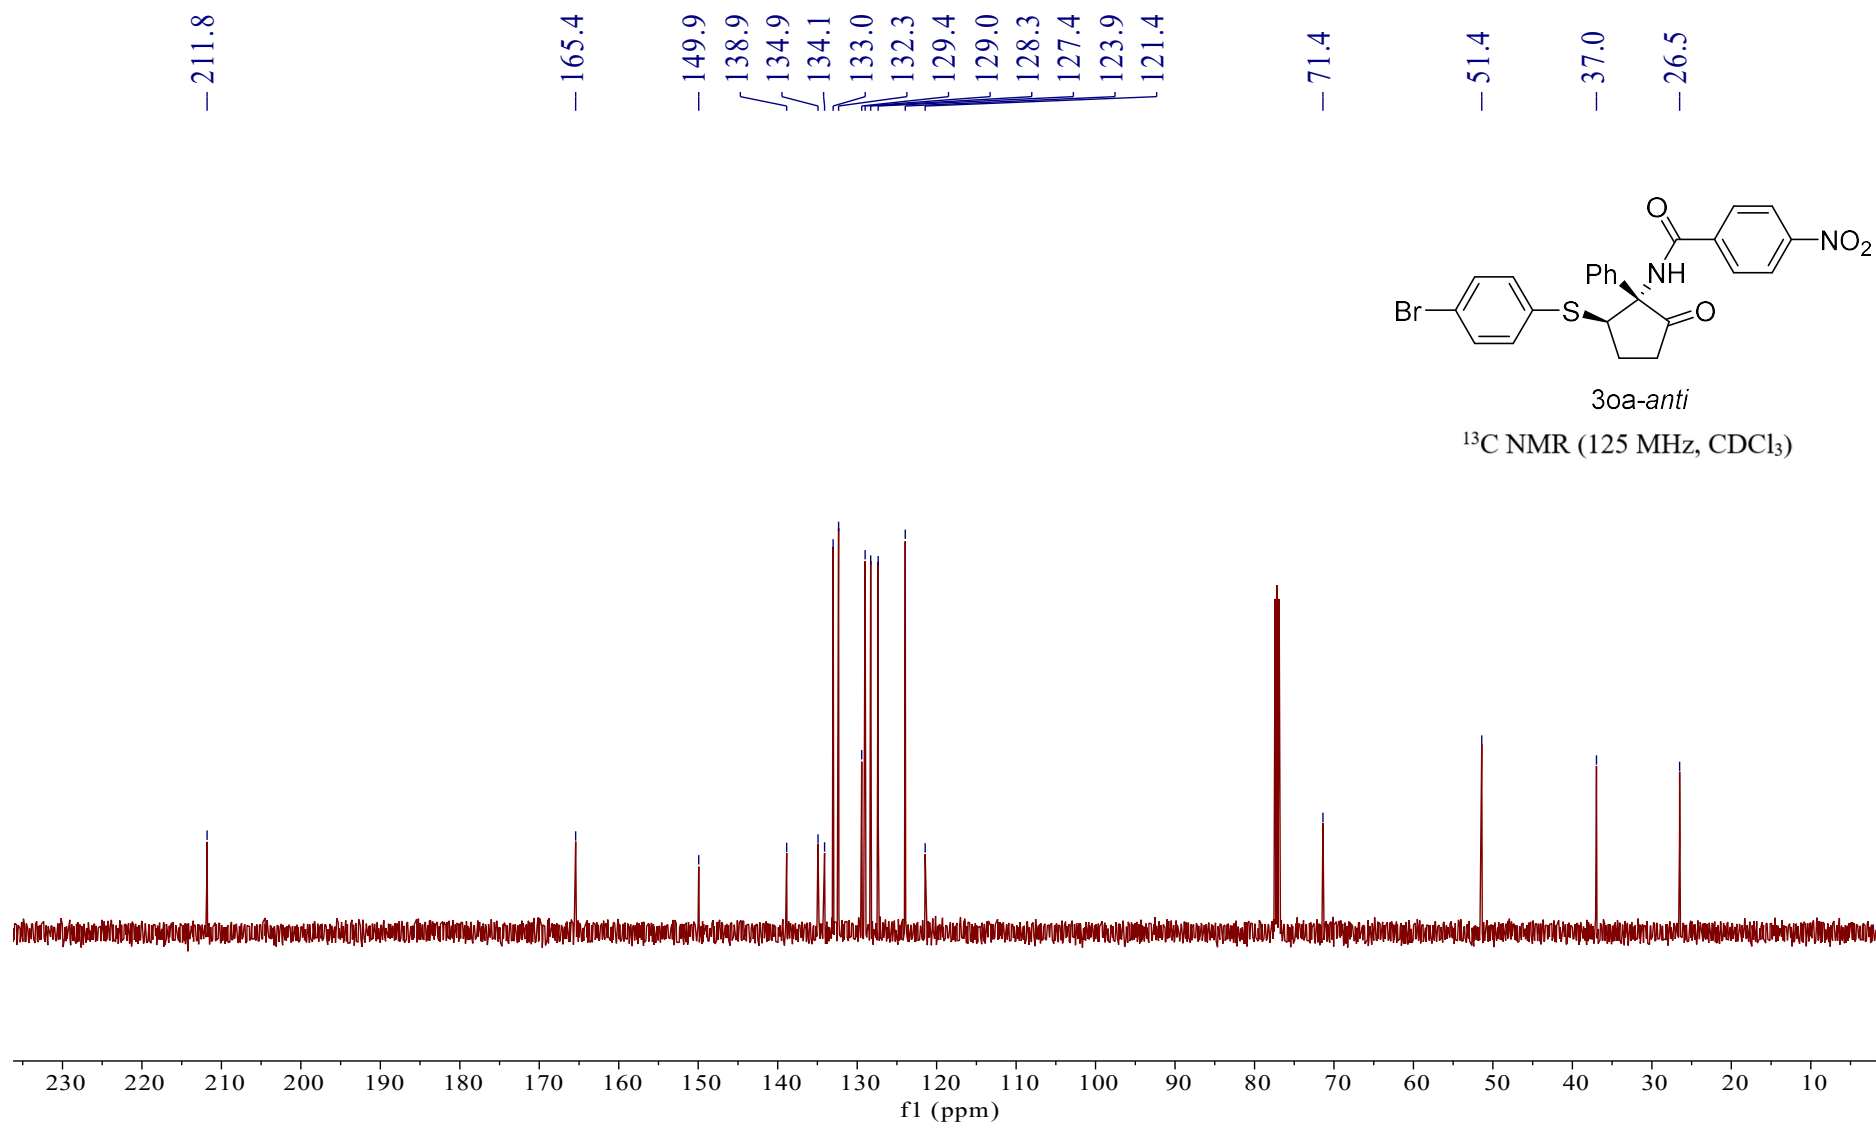





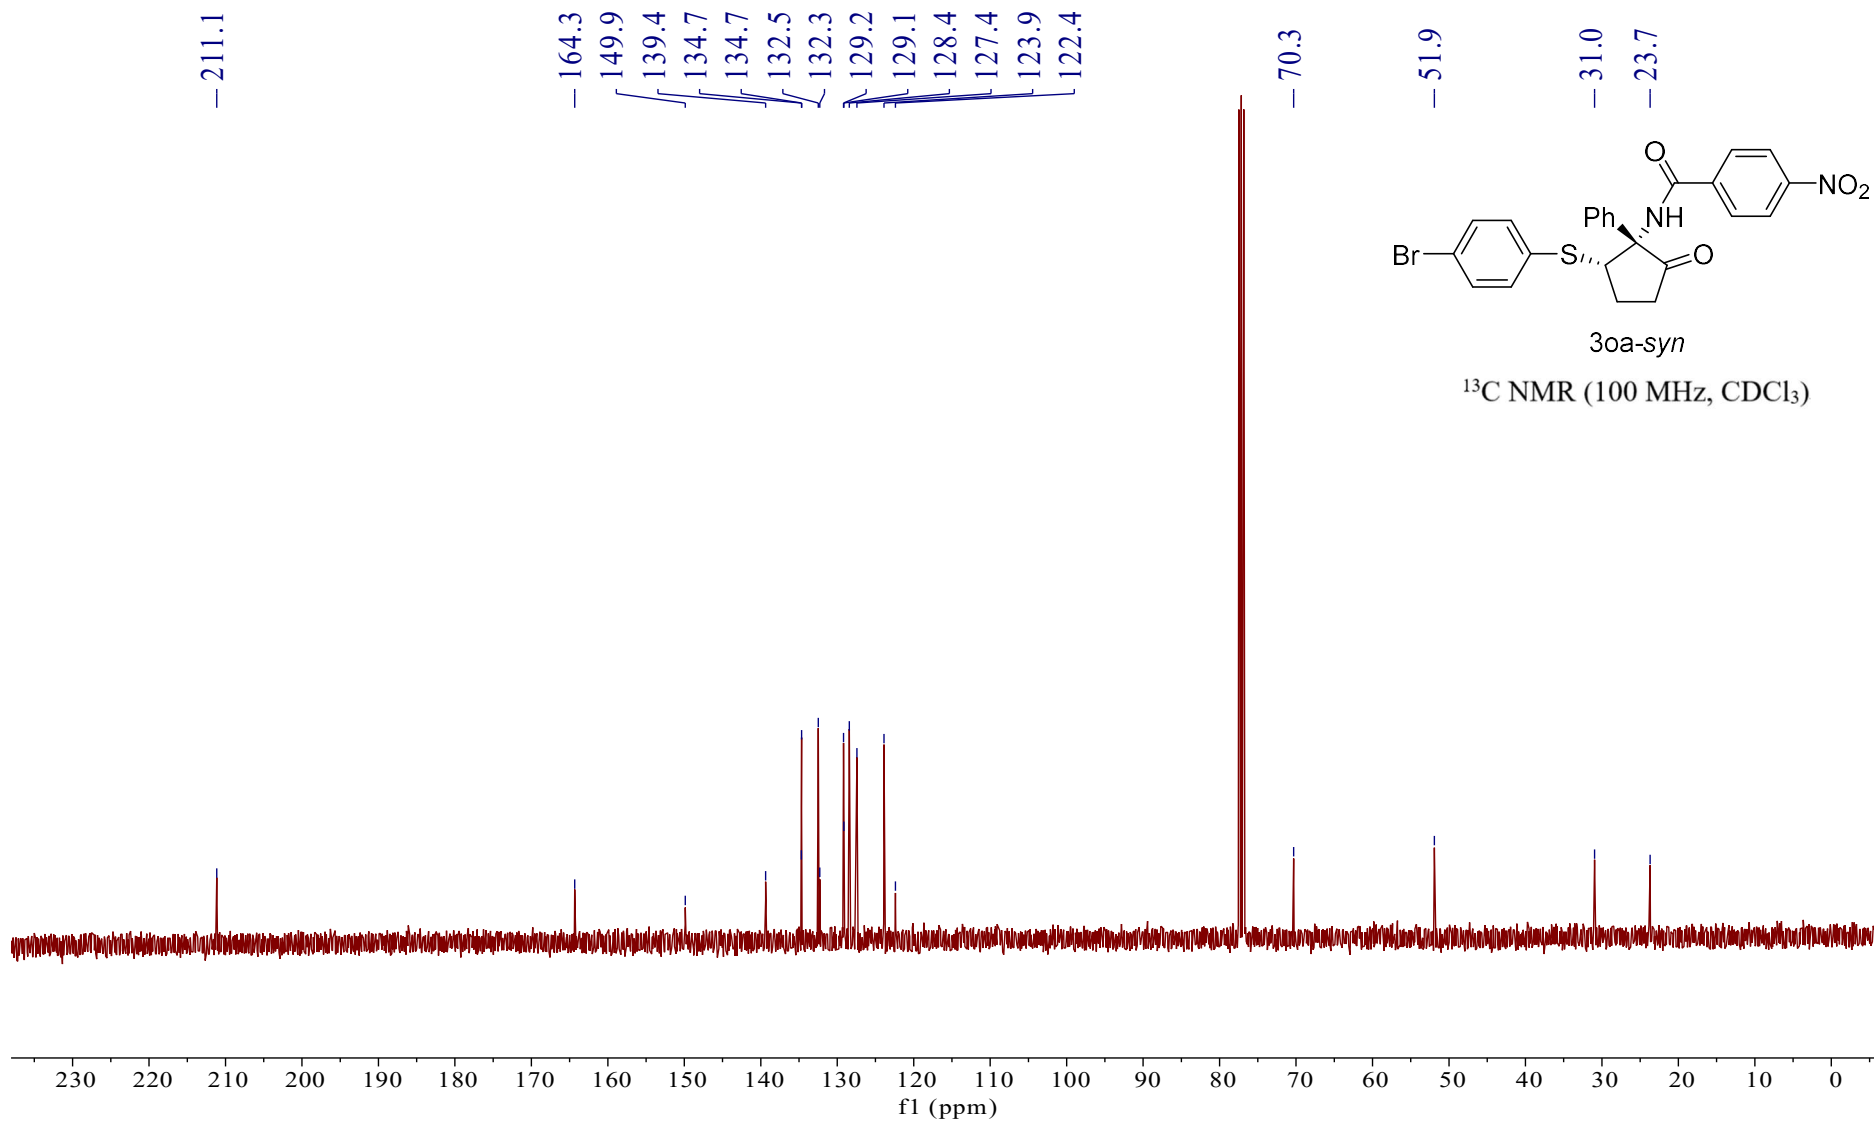

NMR-181

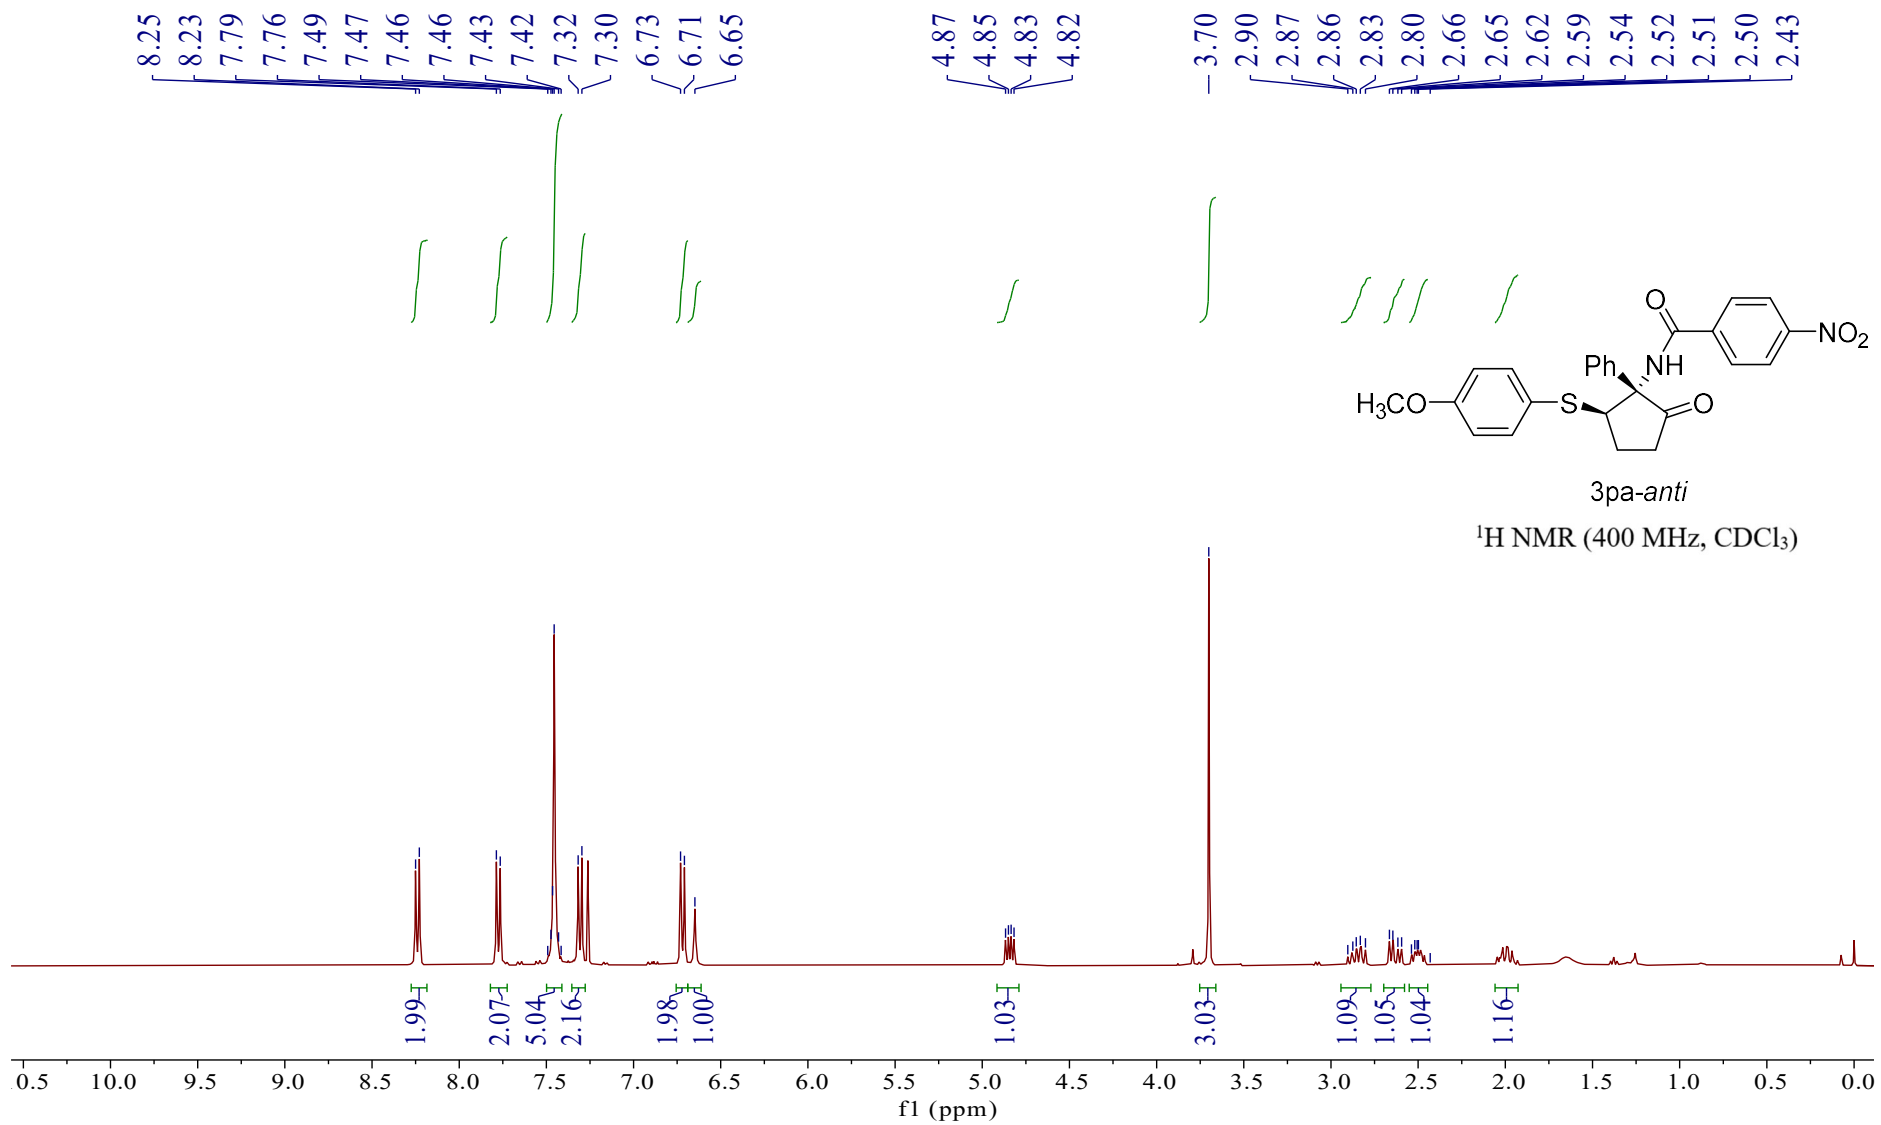

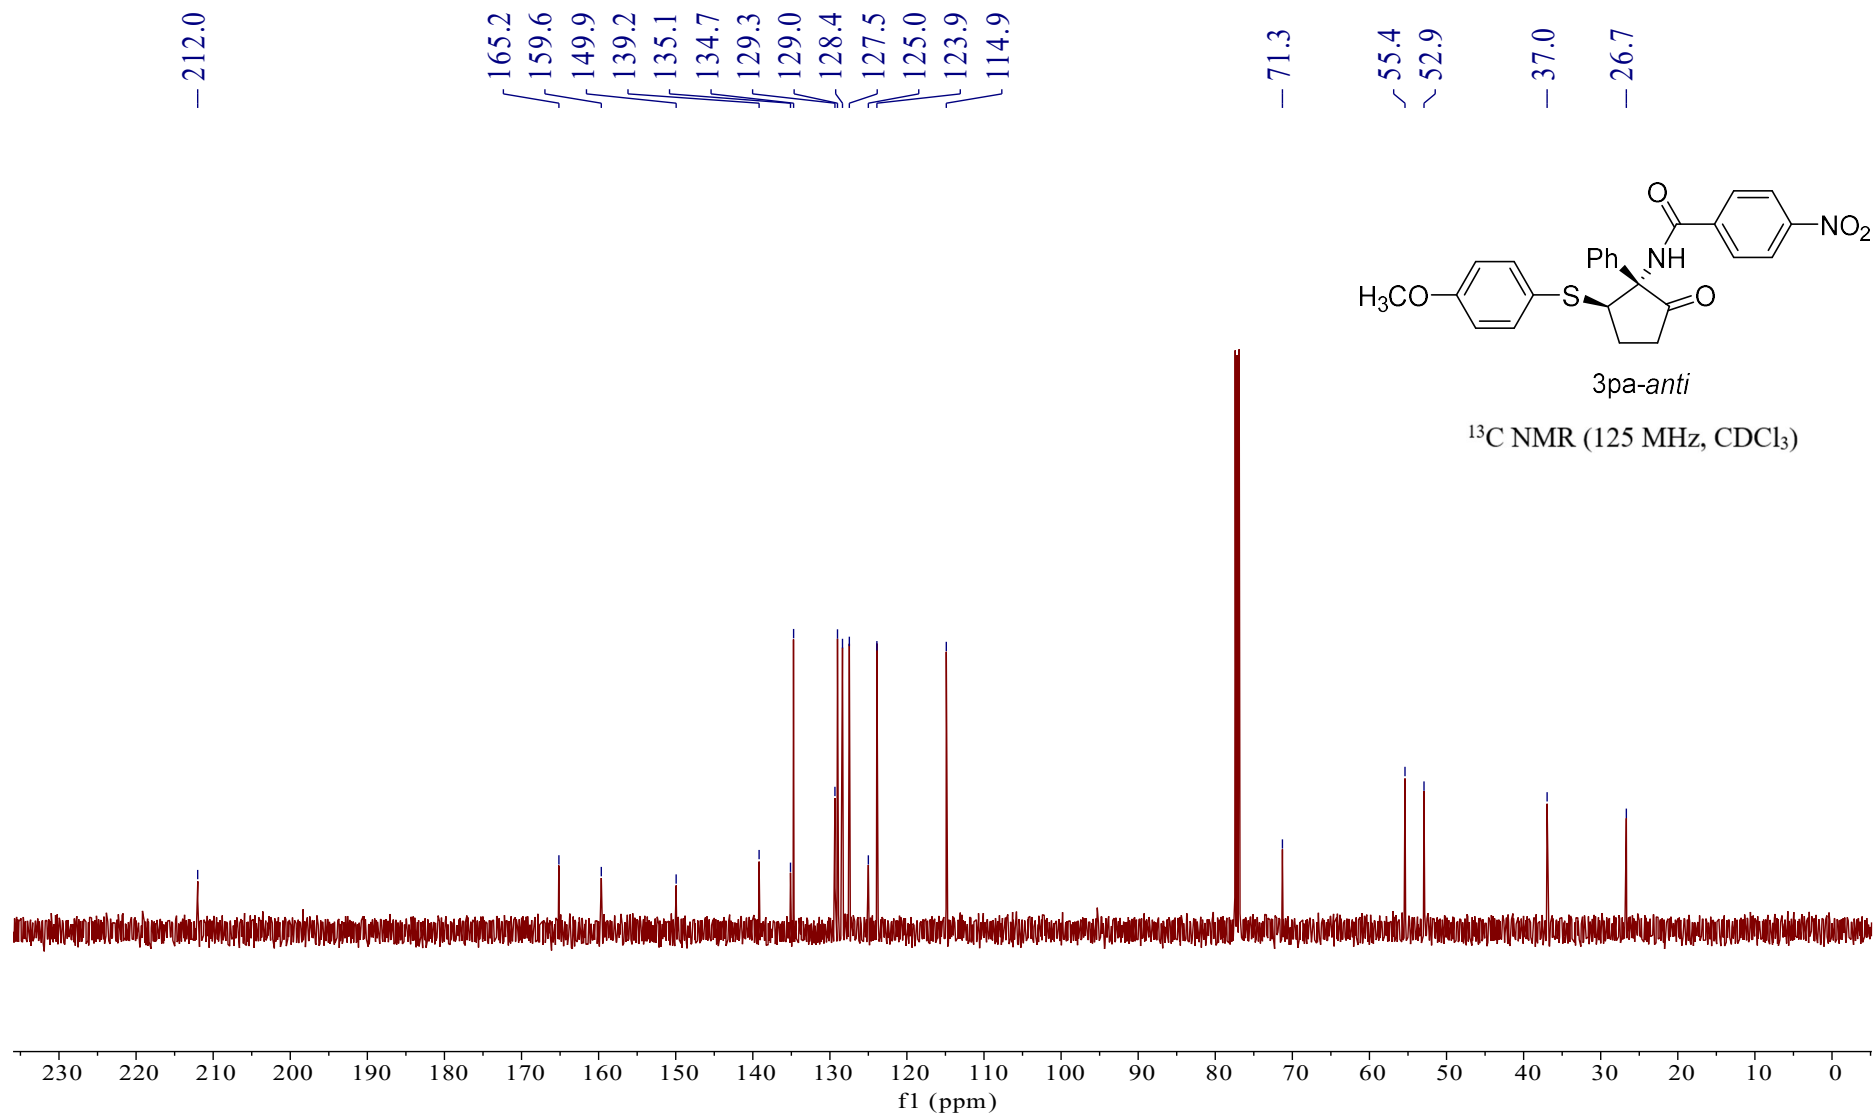

NMR-183

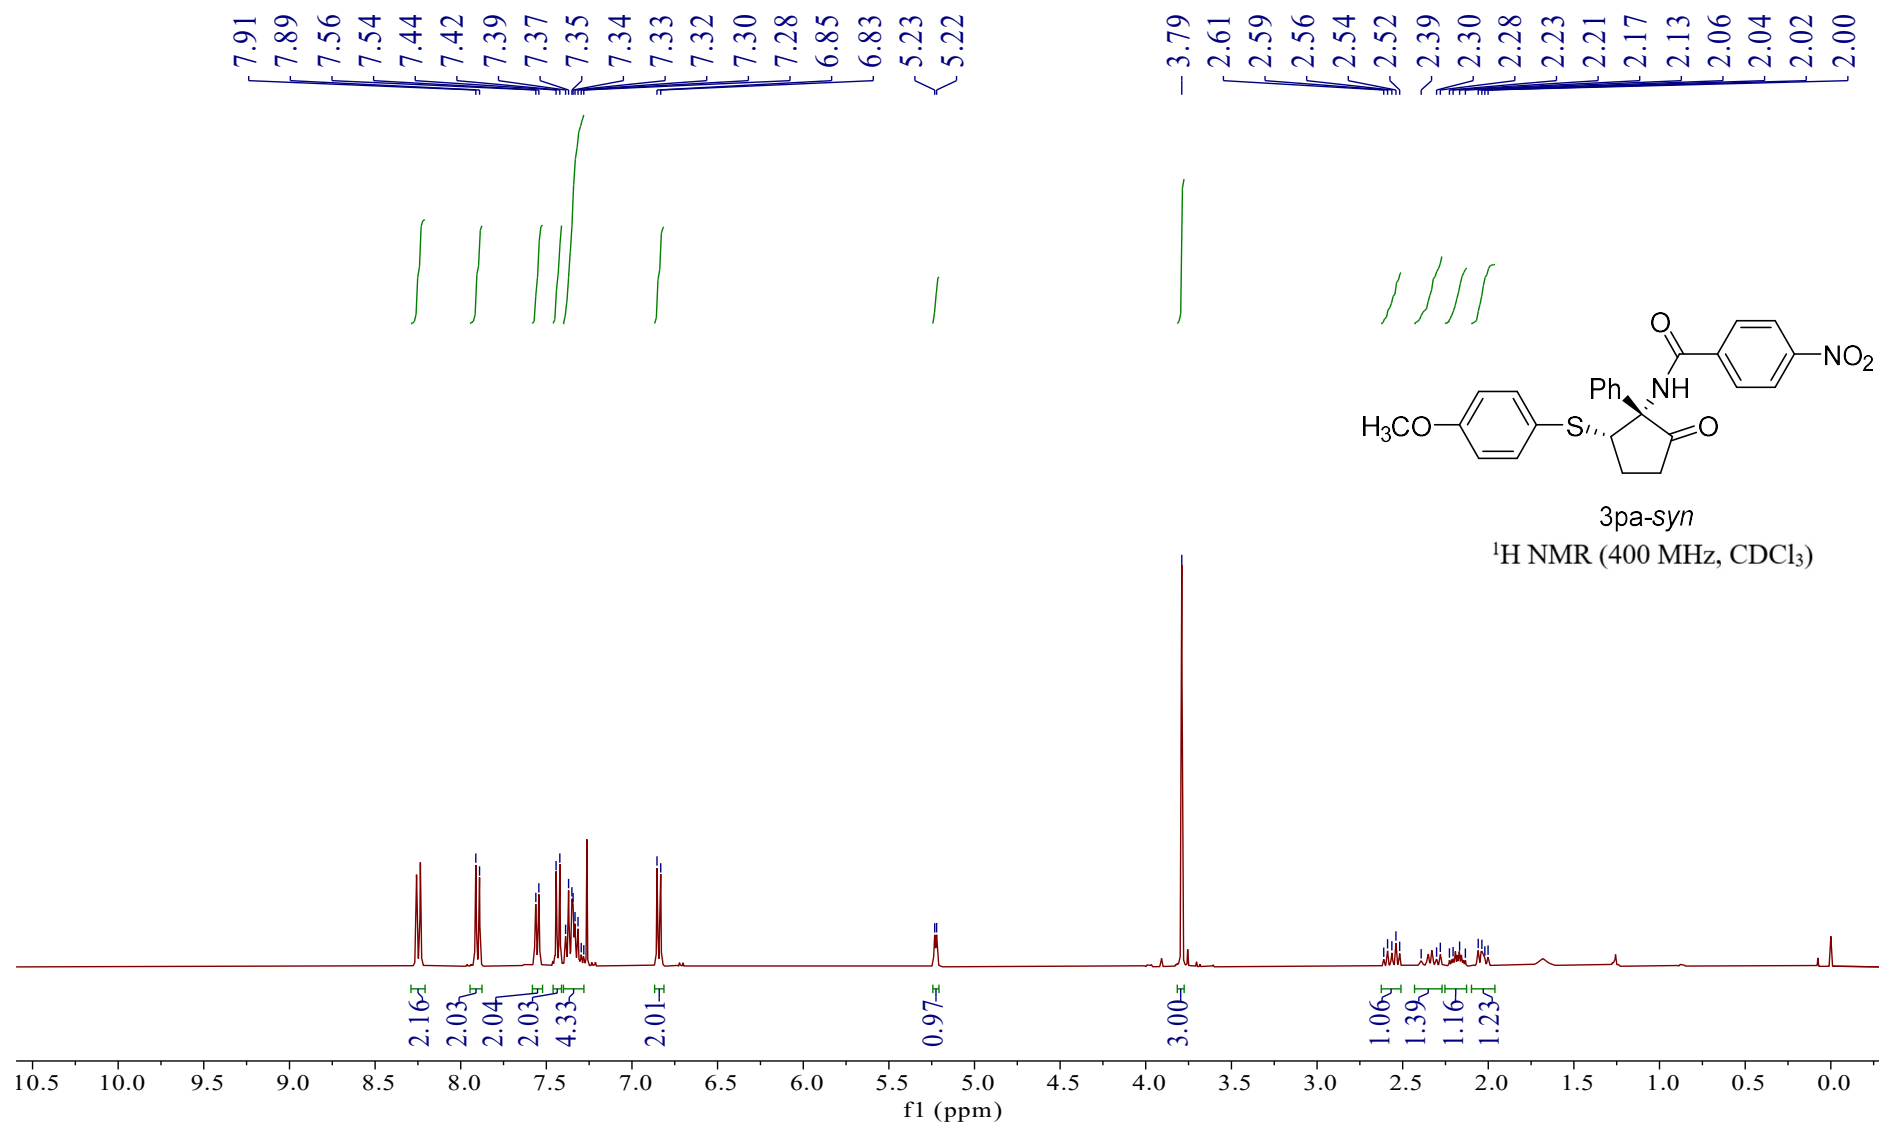

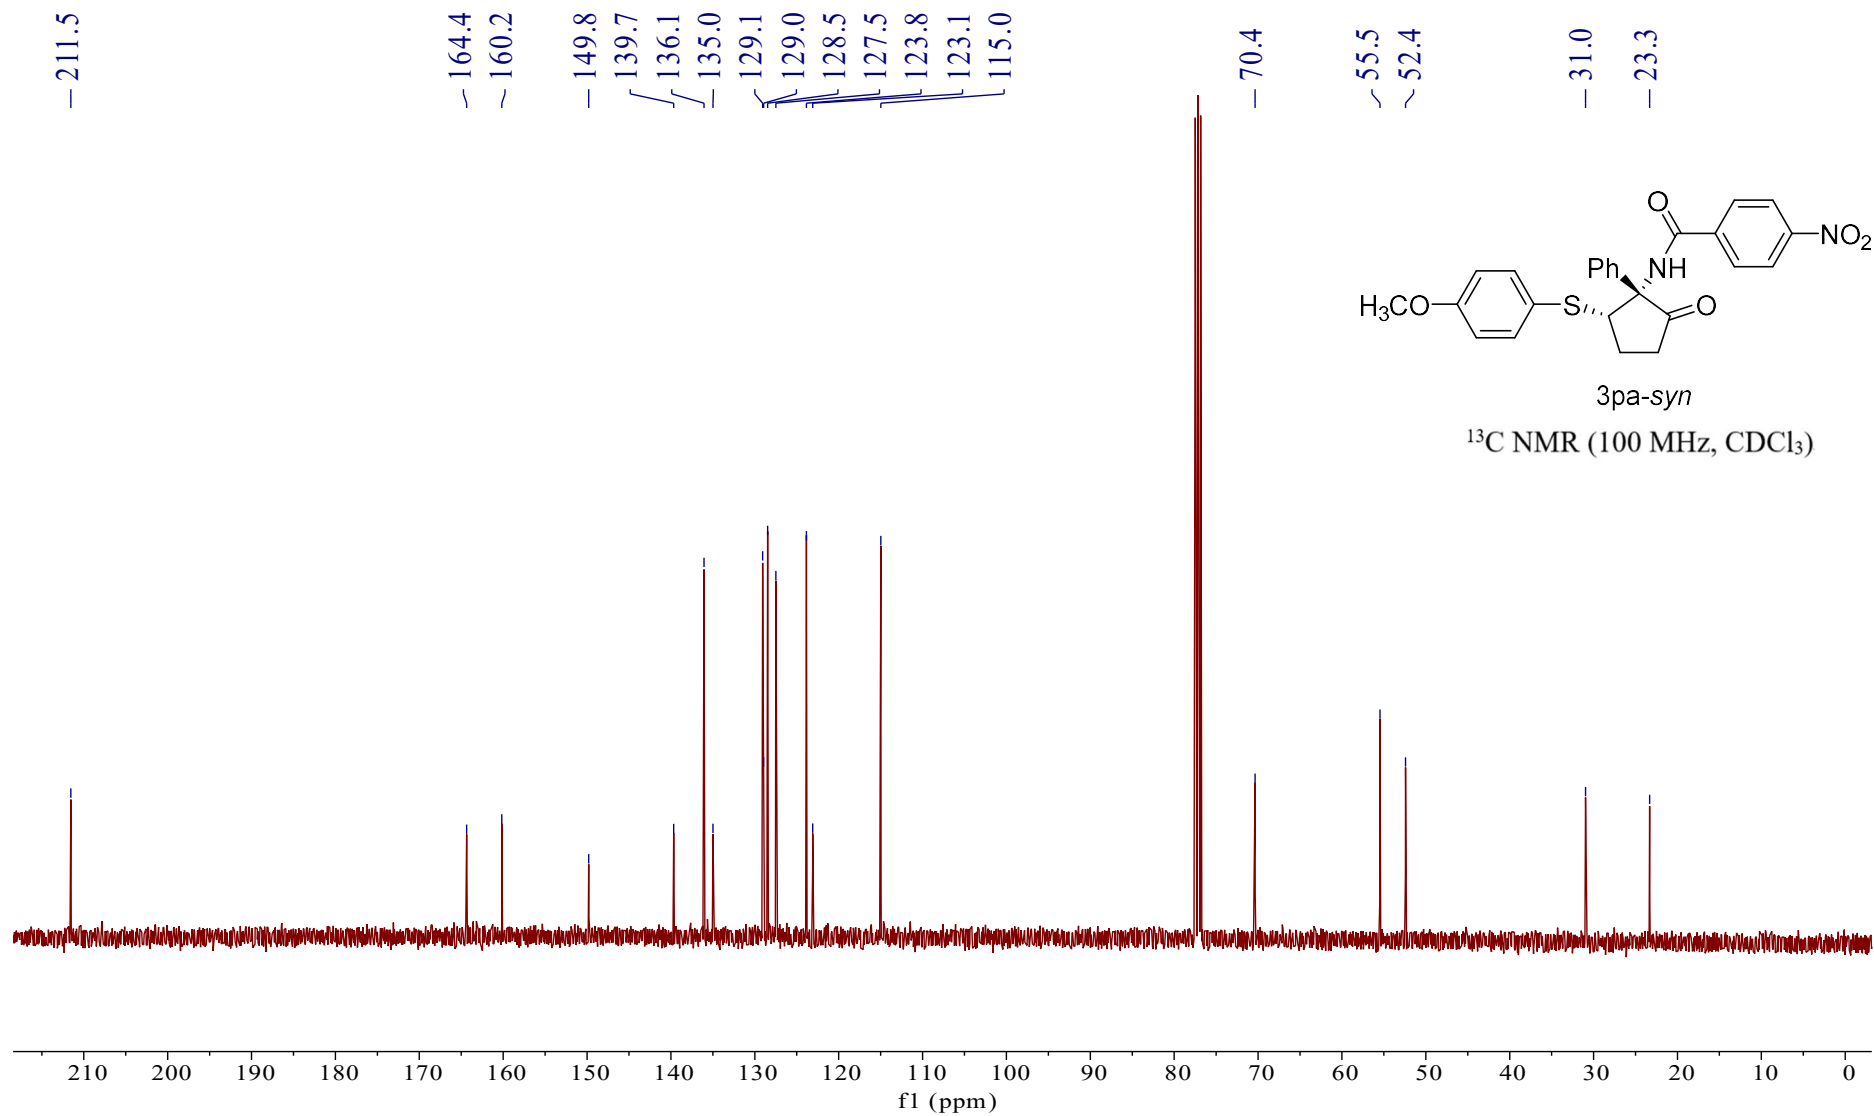

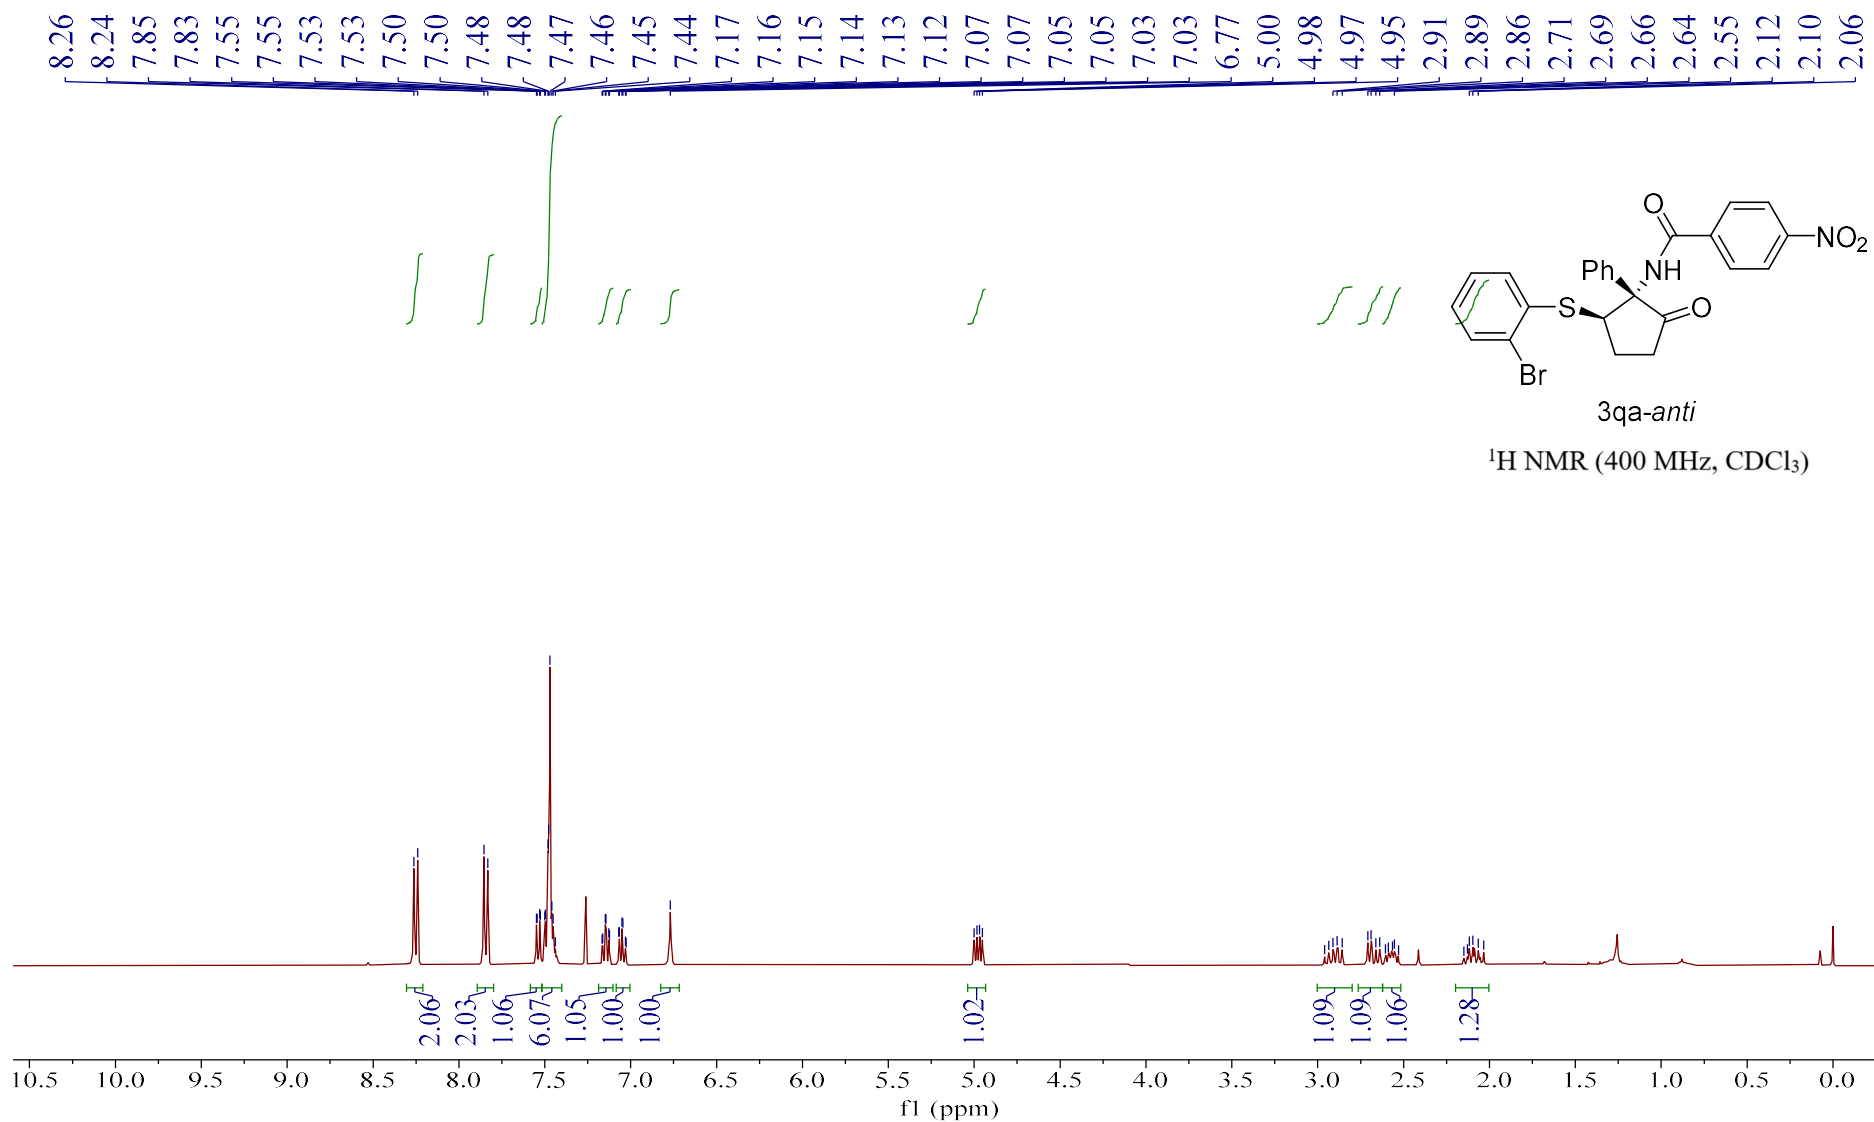

NMR-186

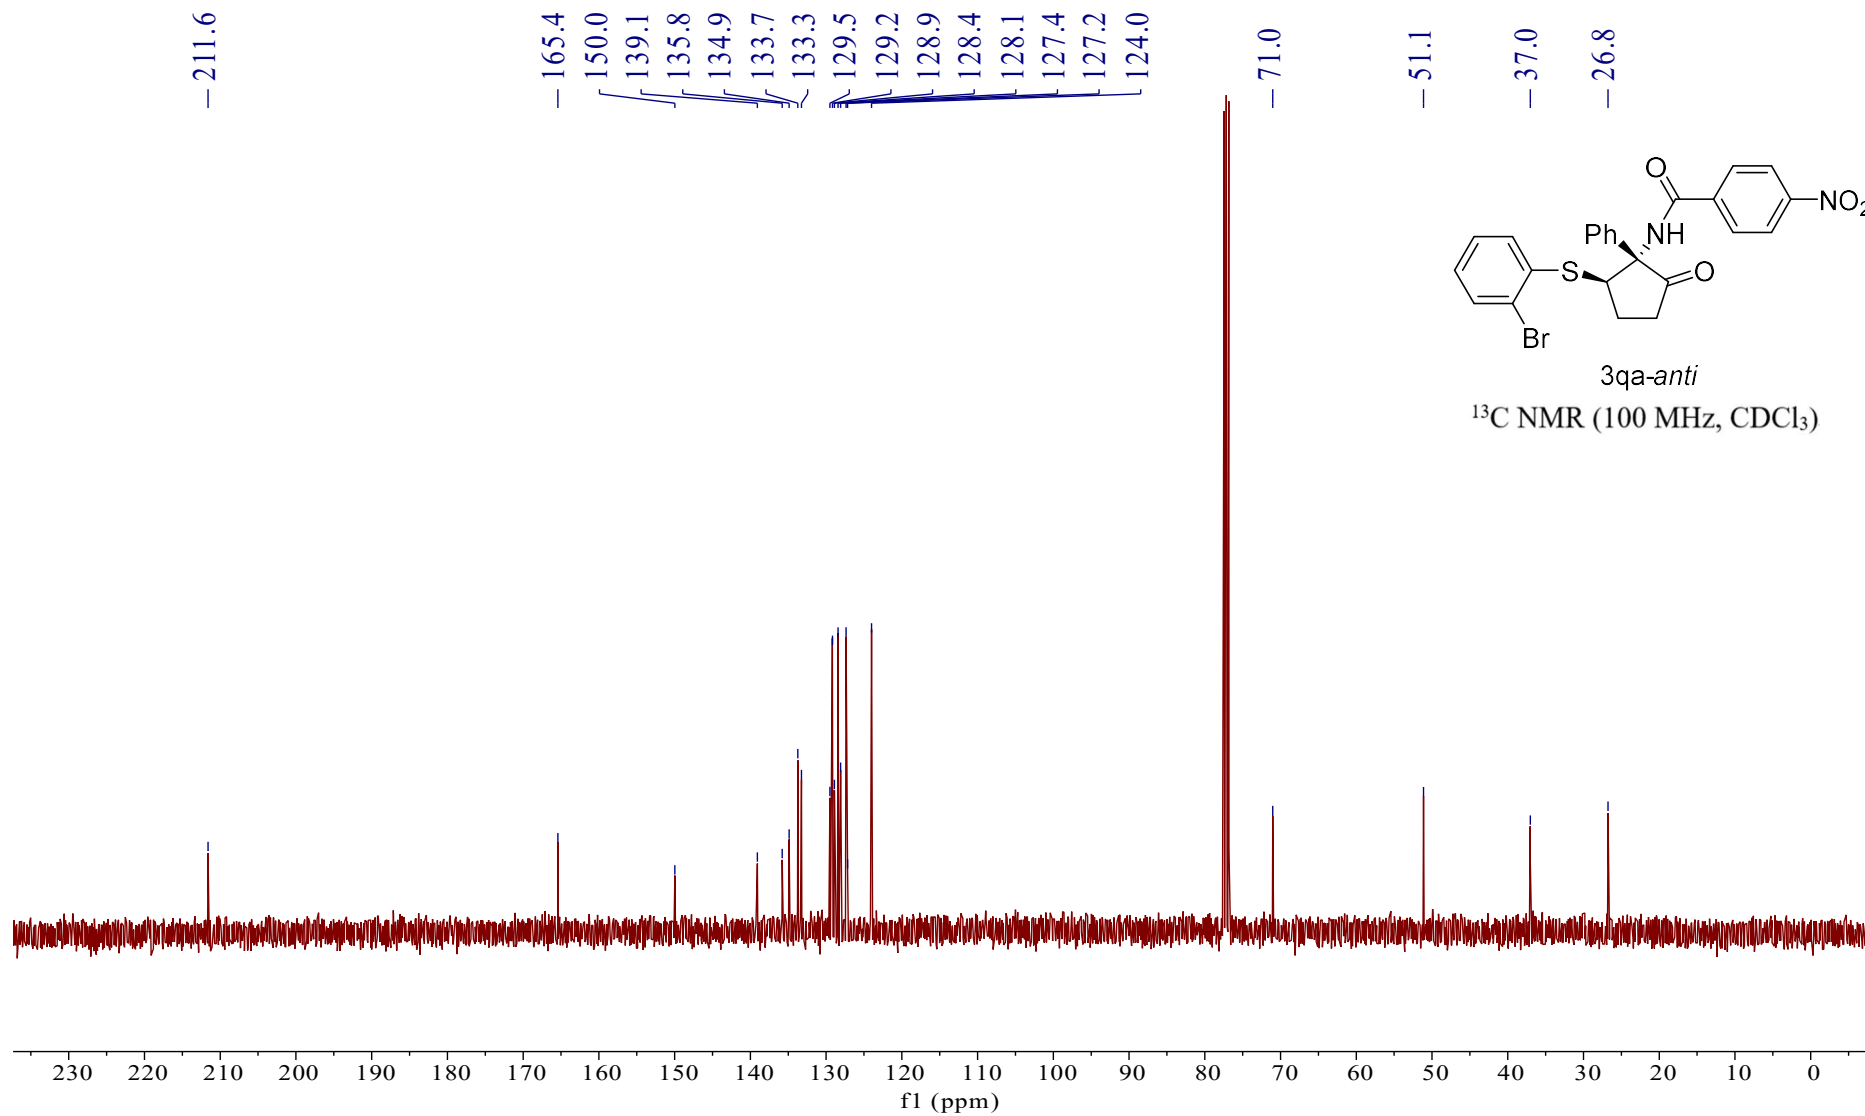

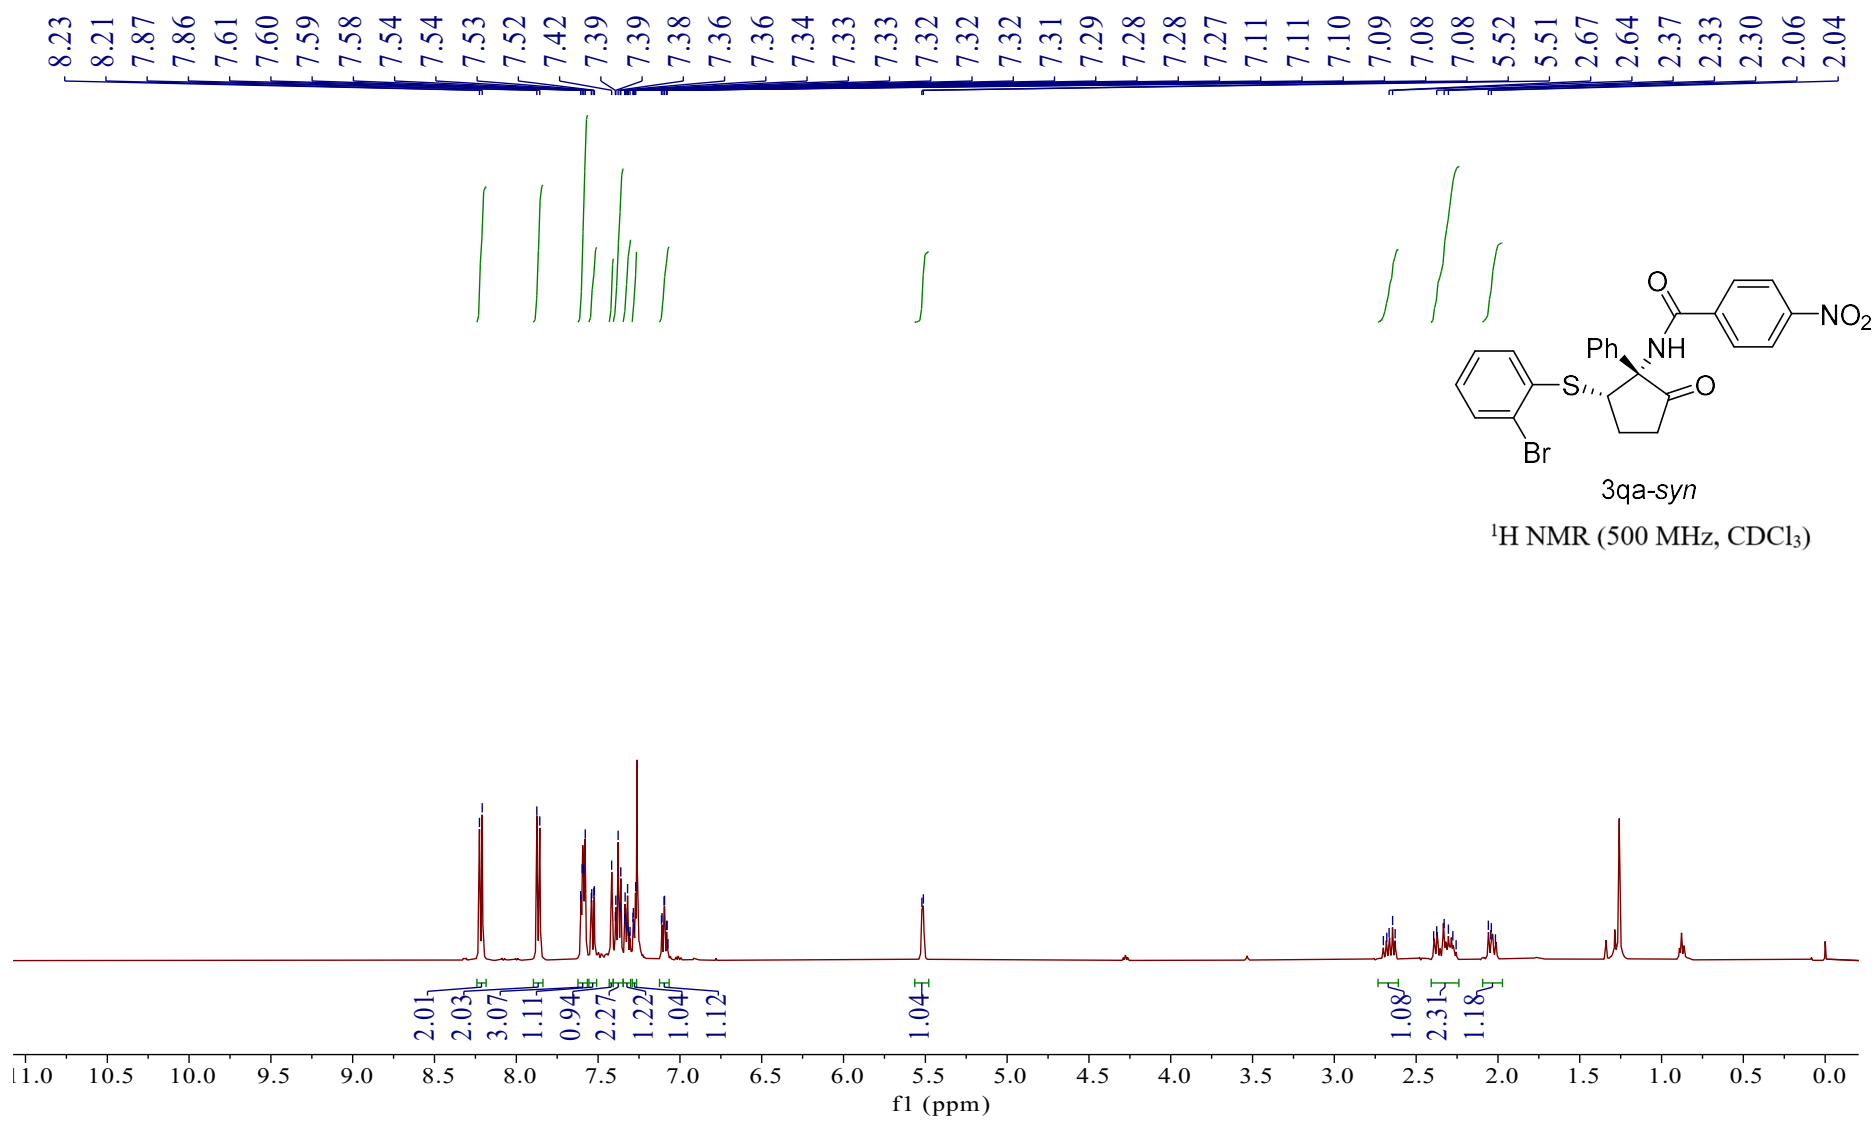



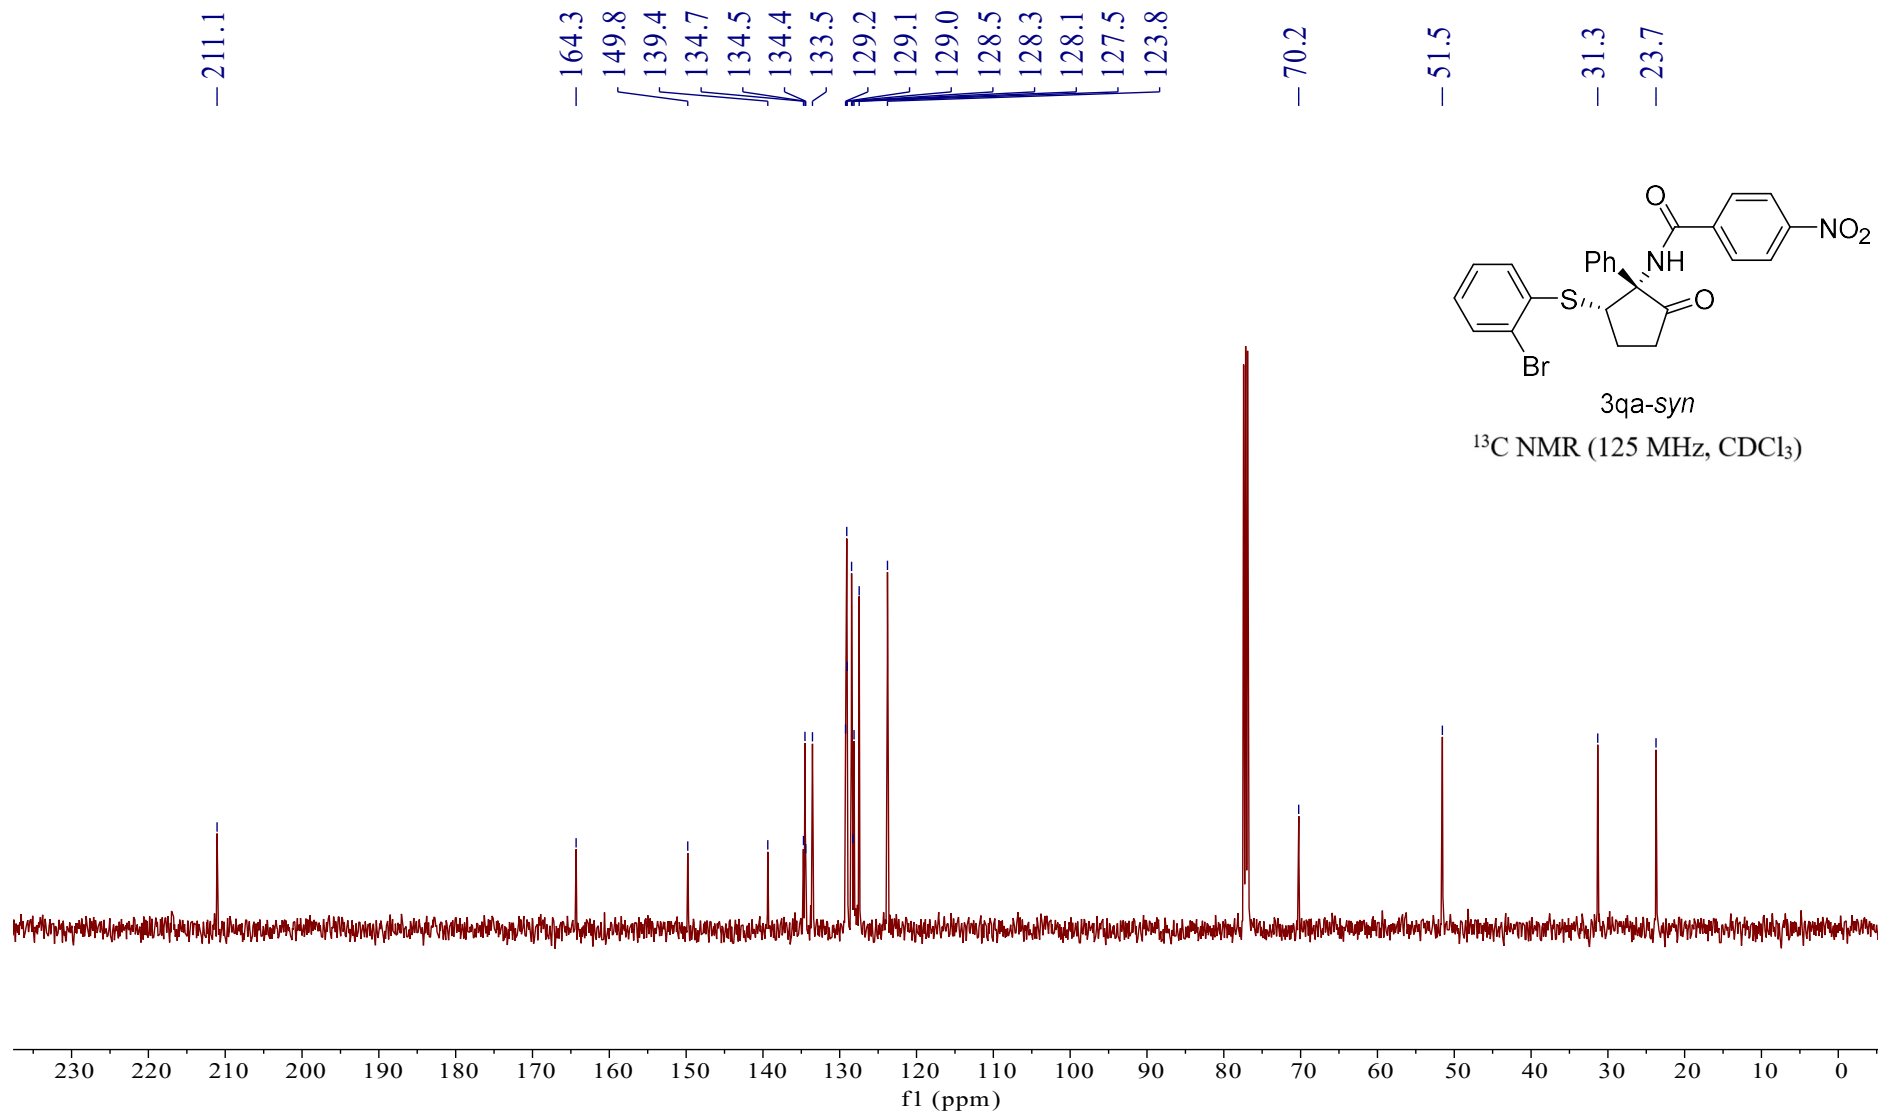

NMR-189

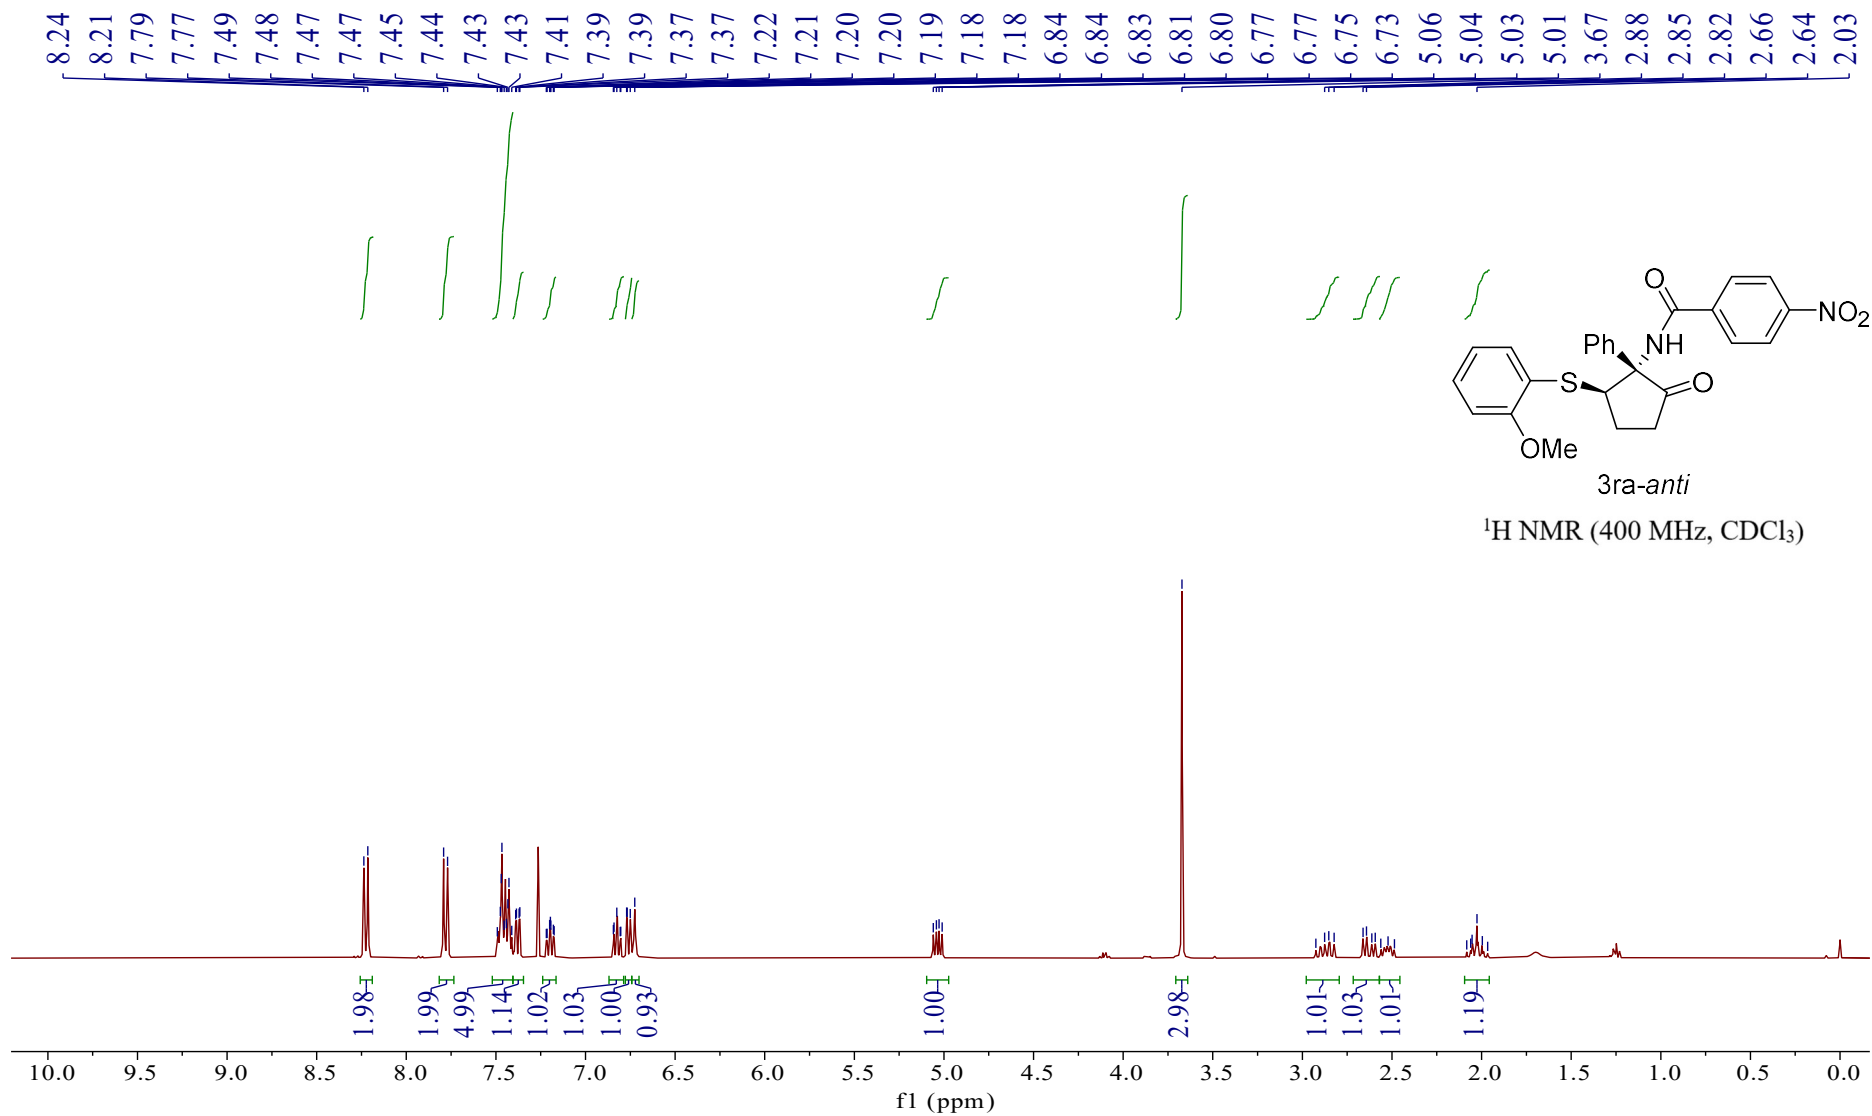

NMR-190

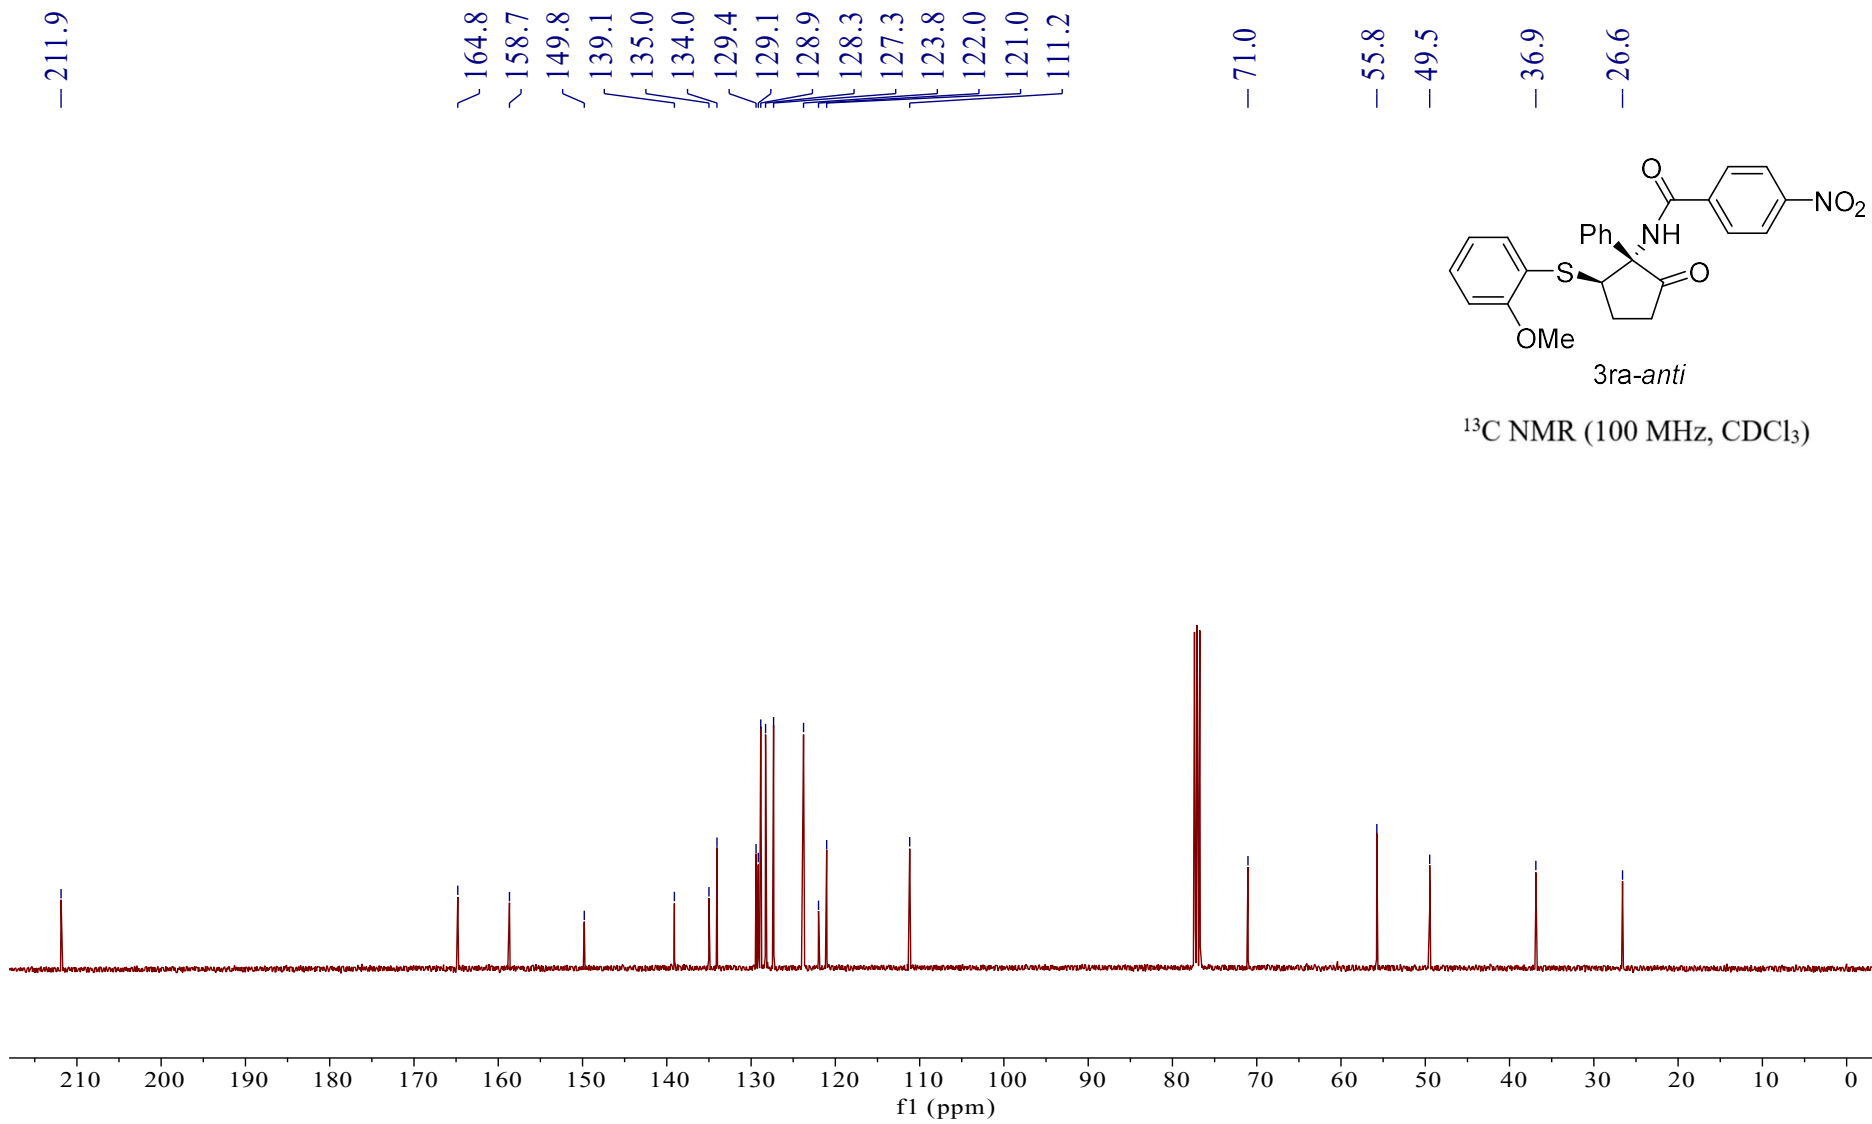

NMR-191

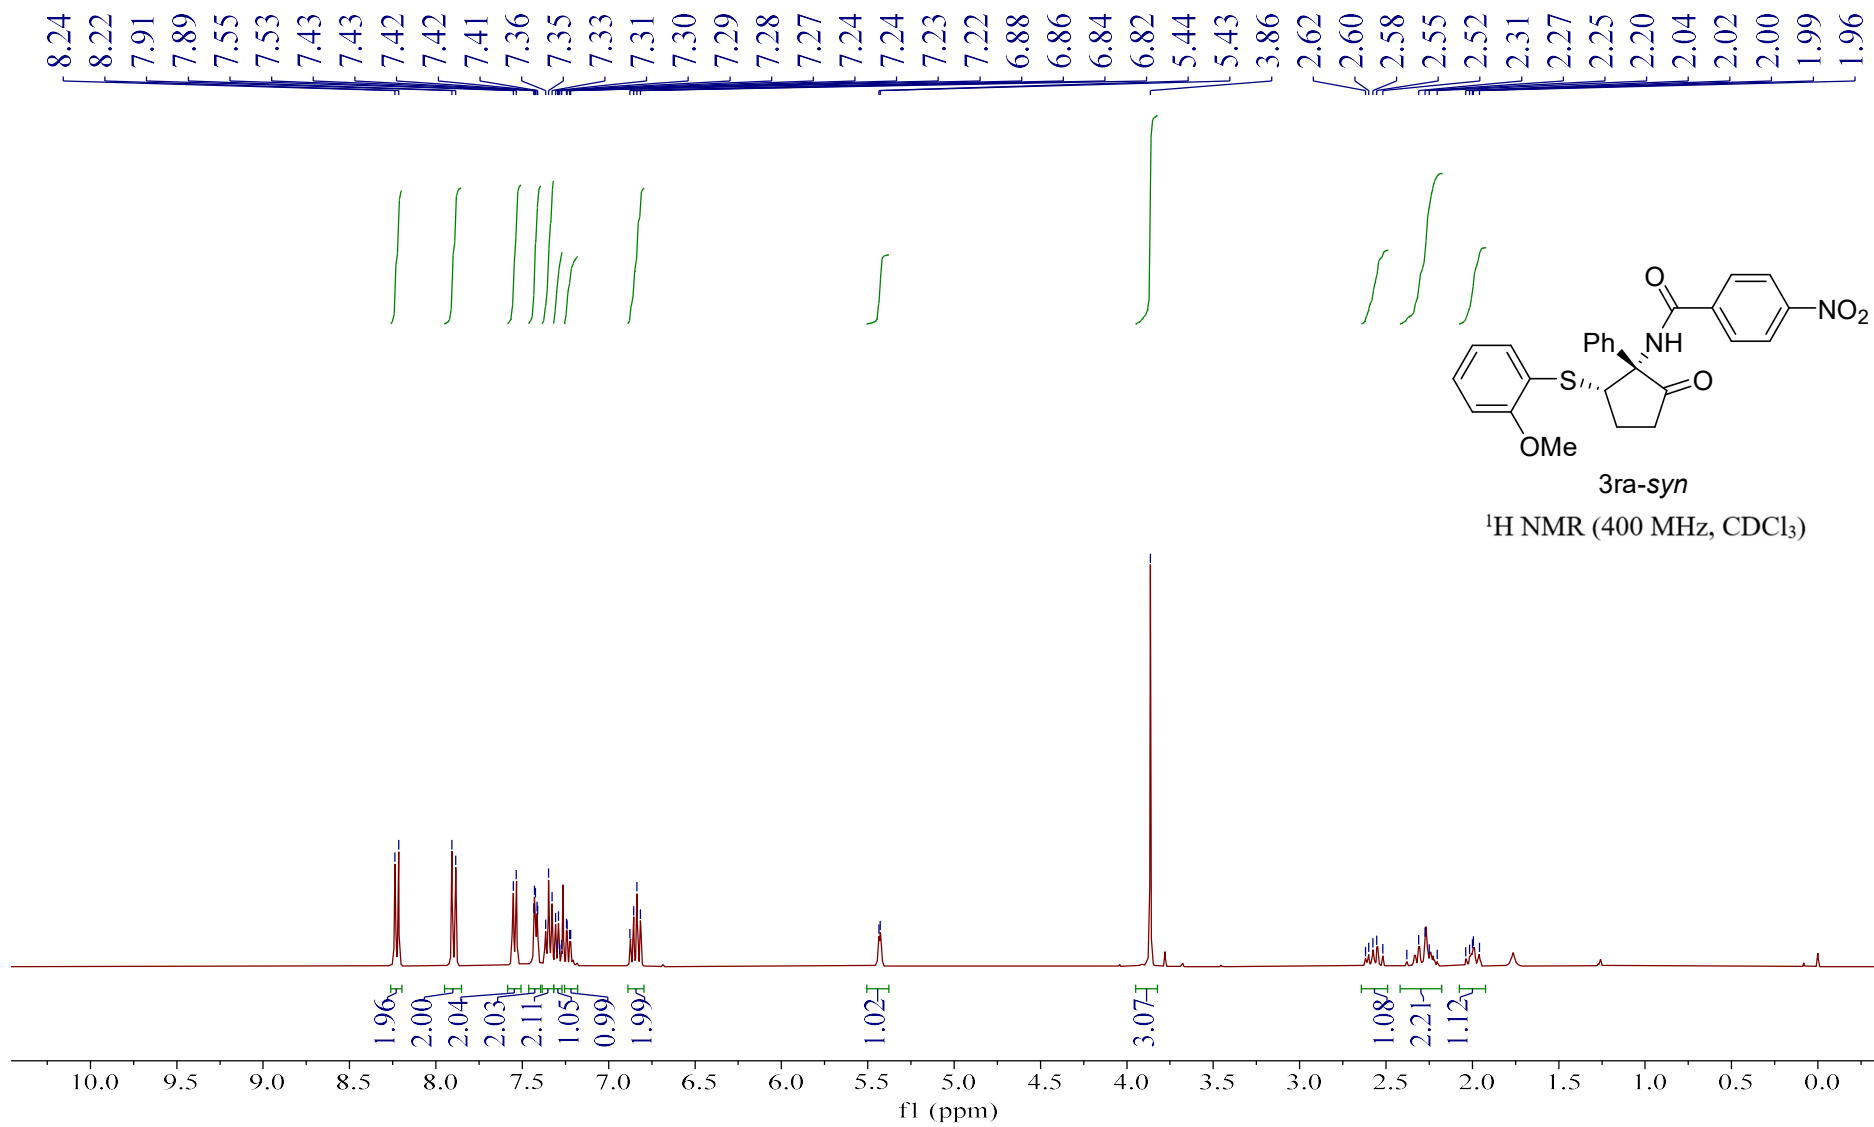

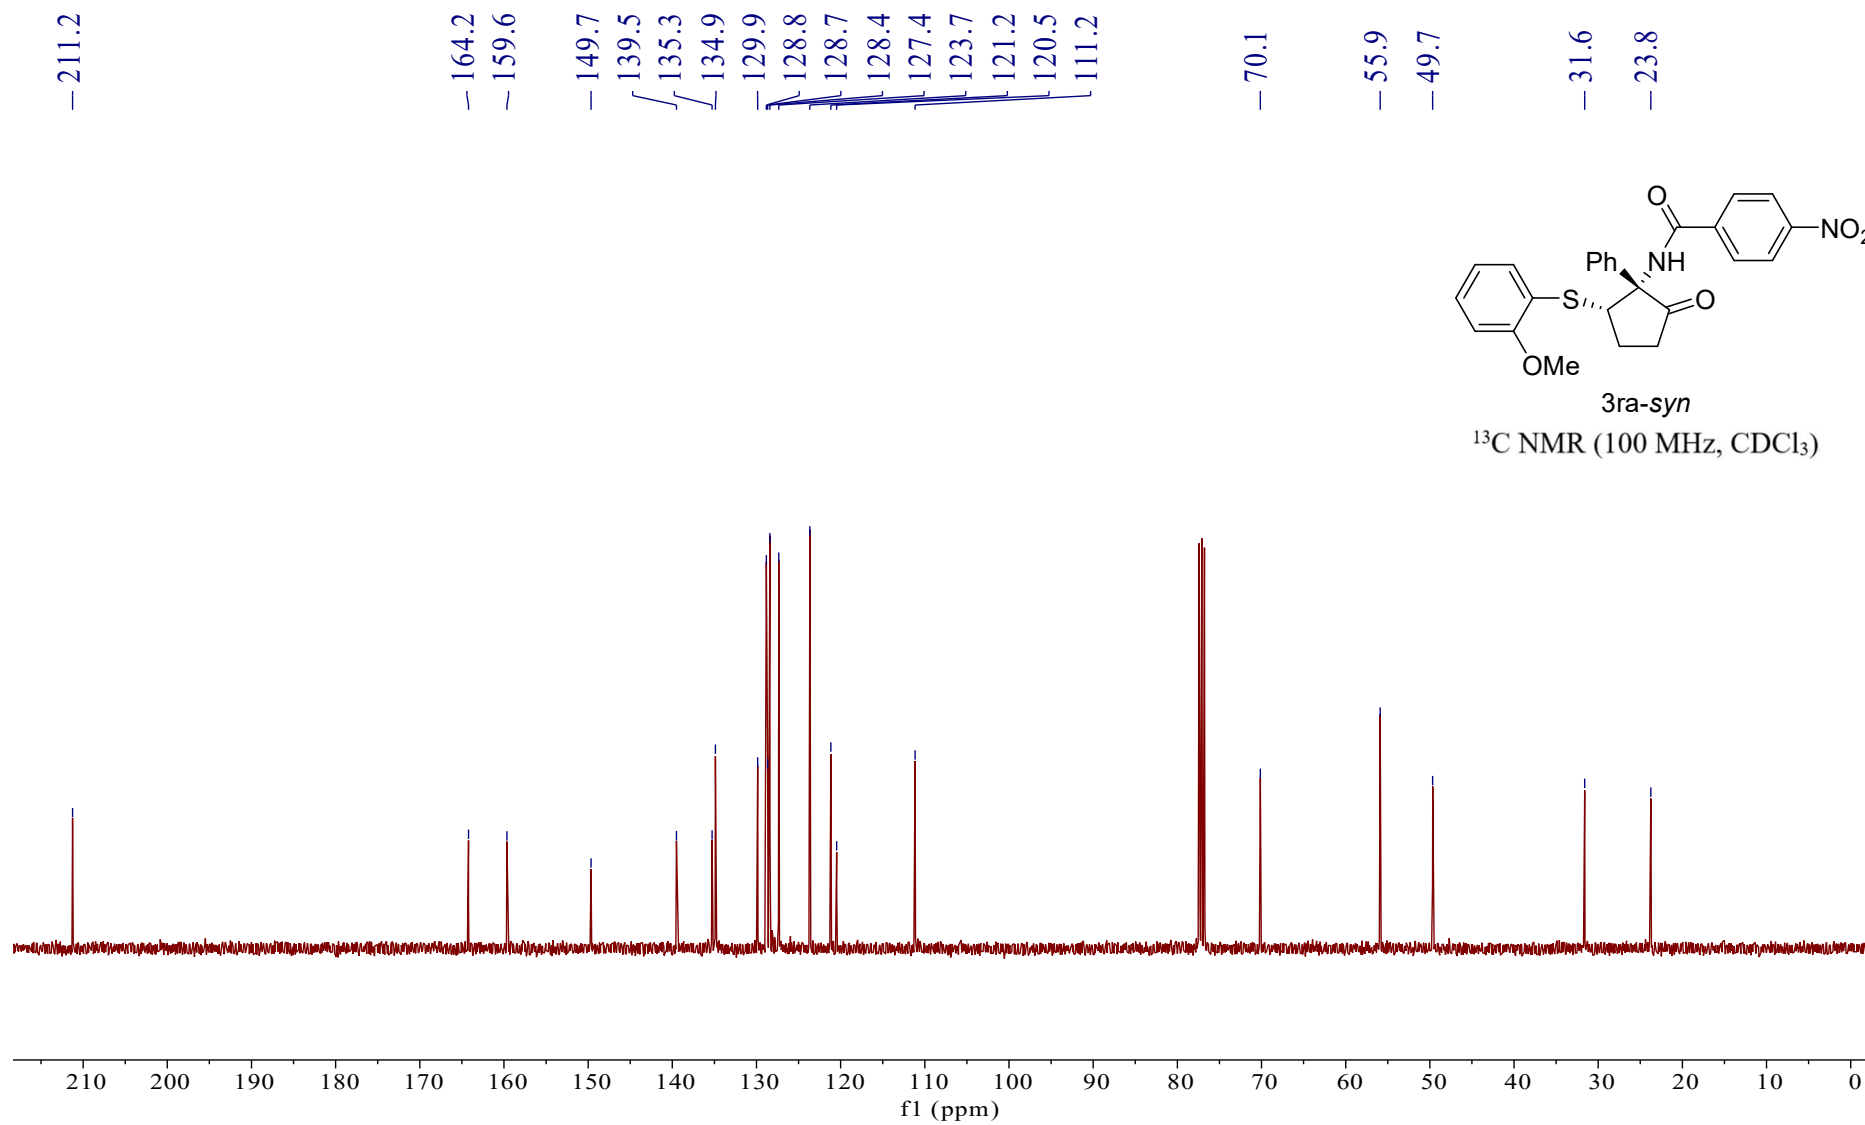

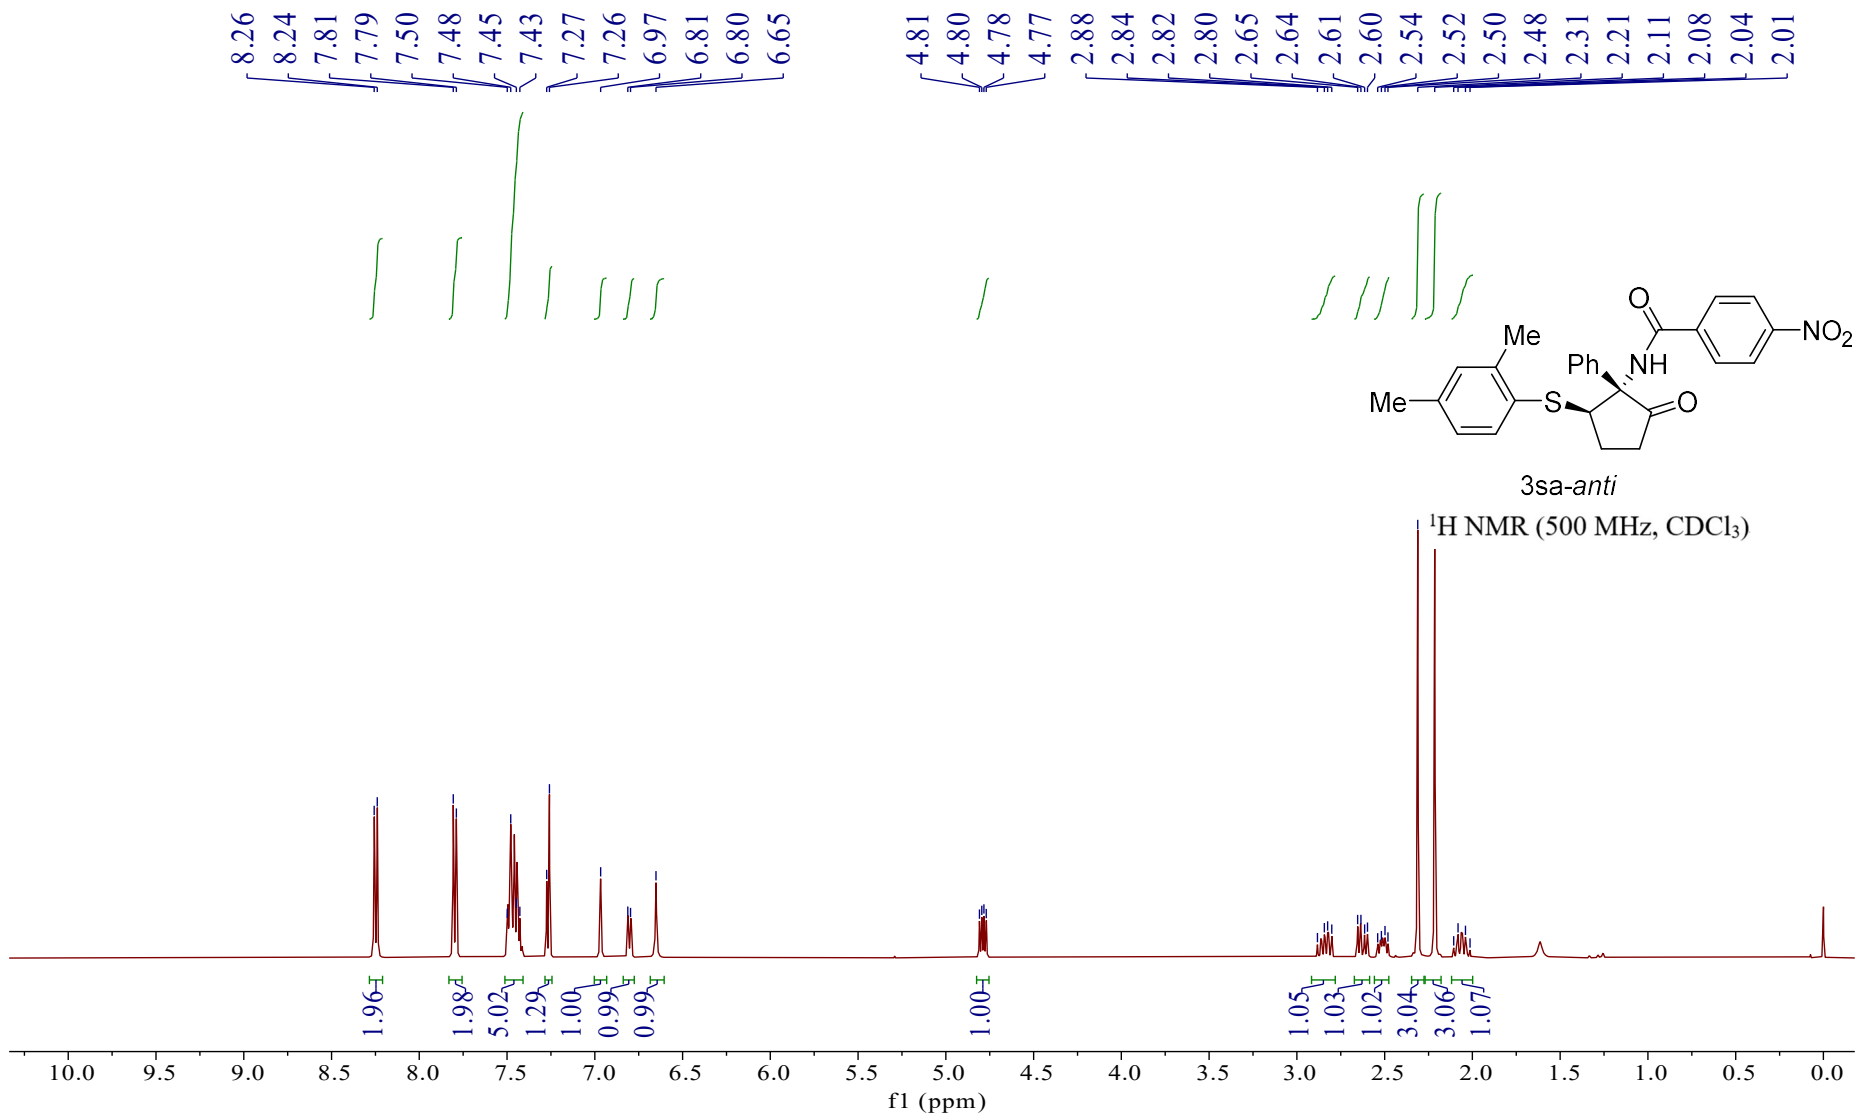

NMR-194

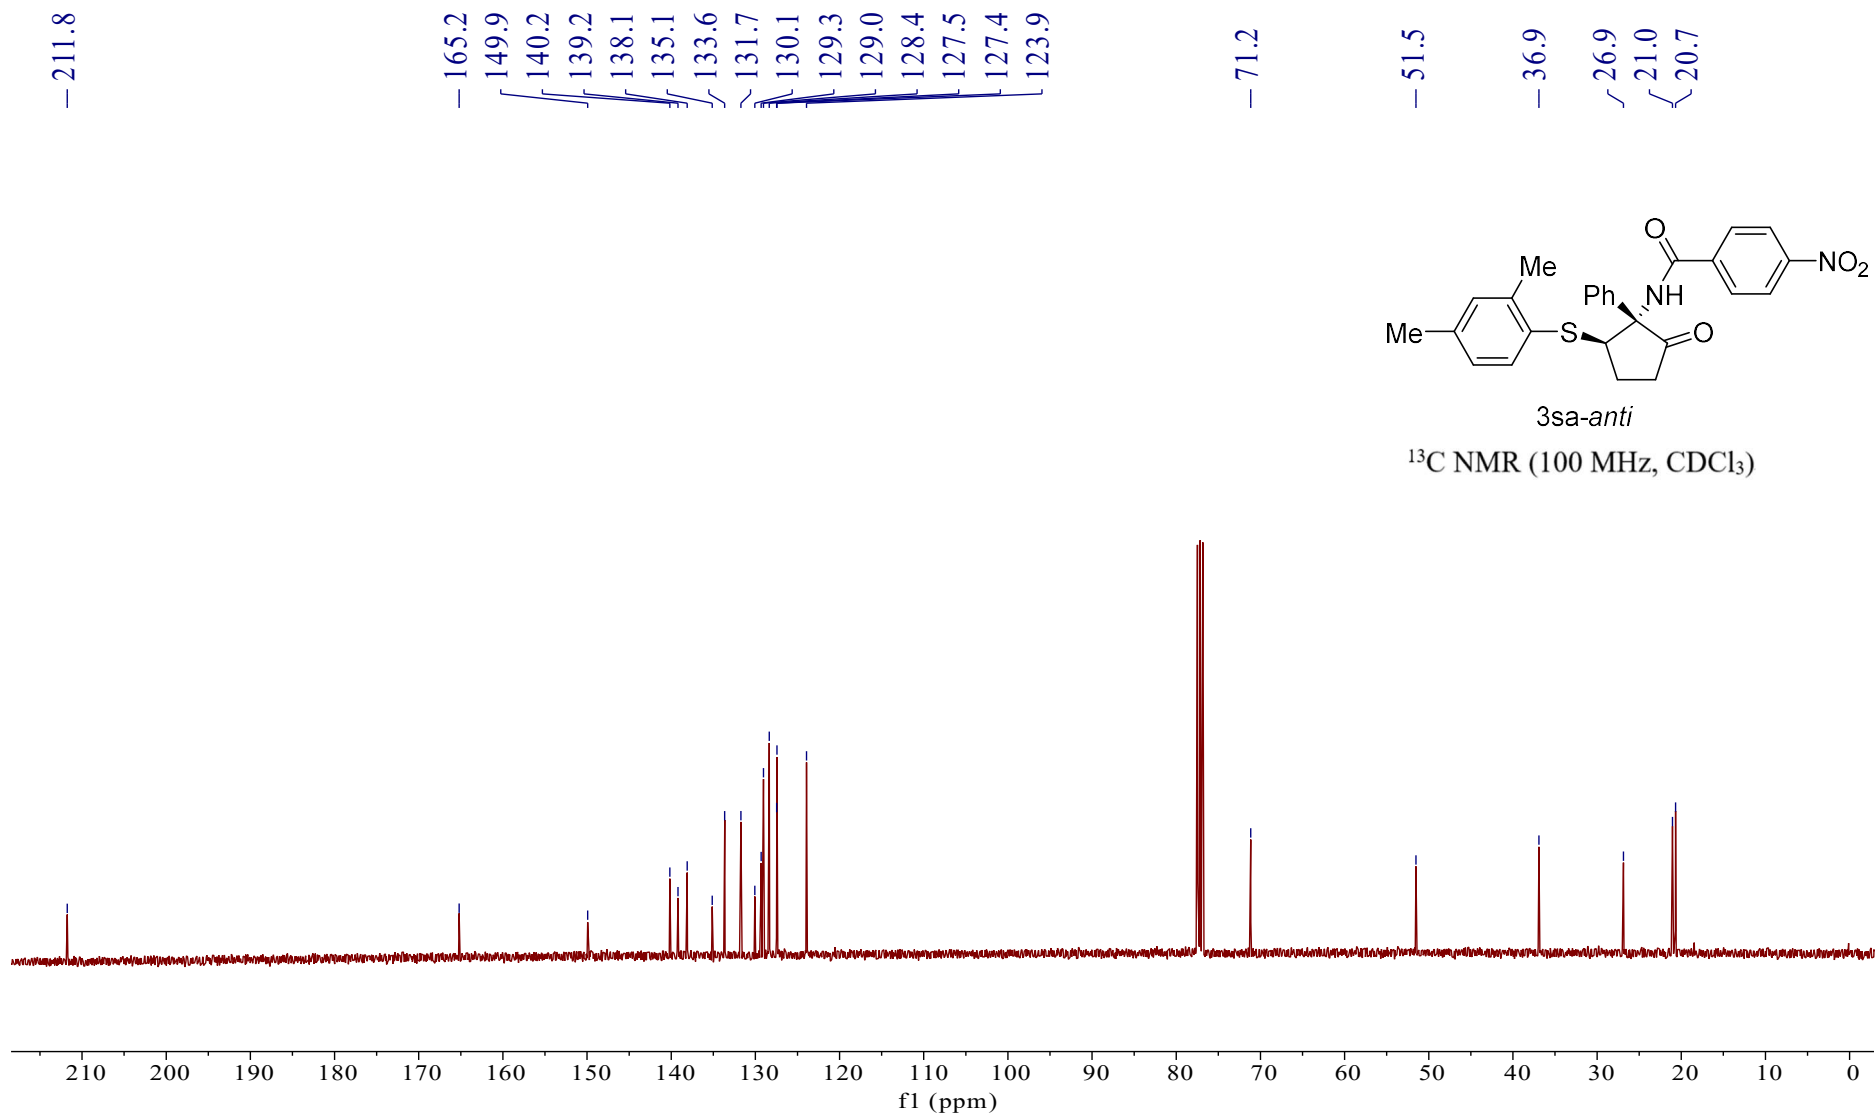

NMR-195

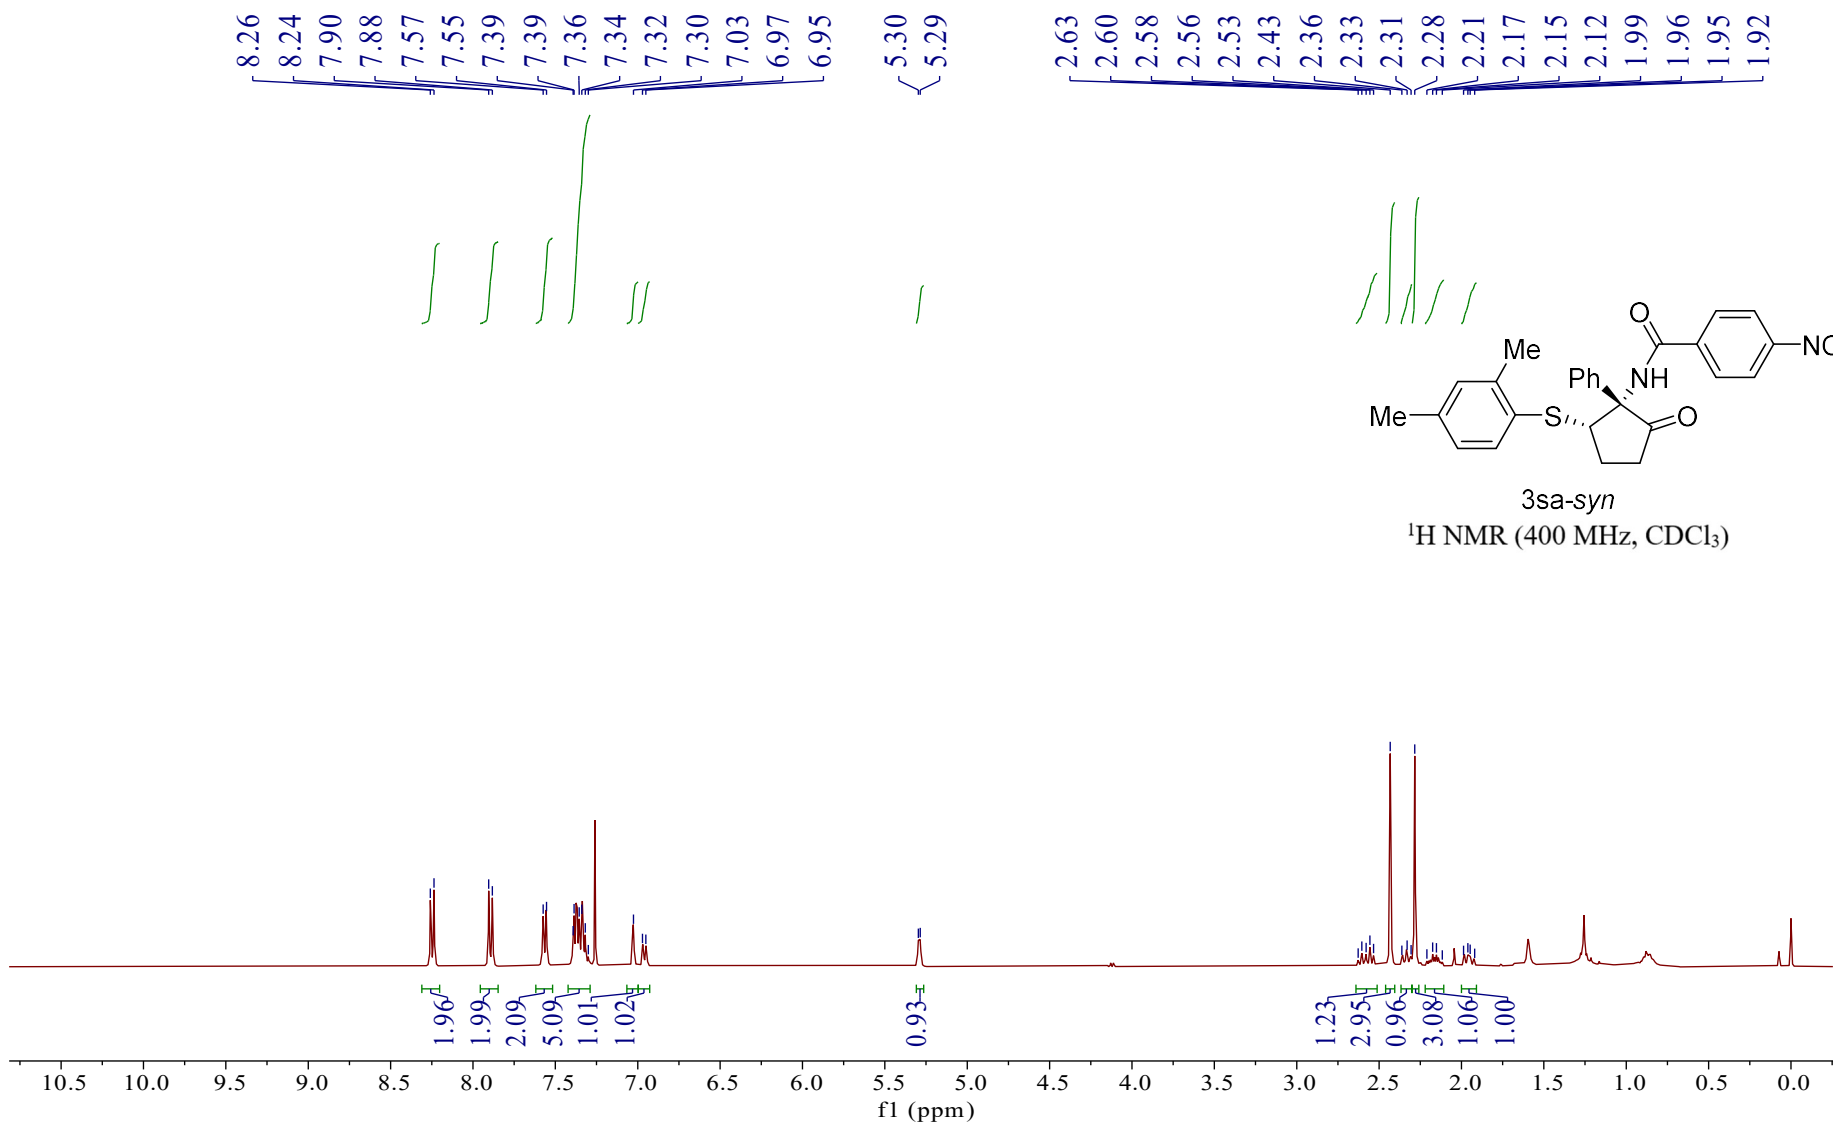

NMR-196



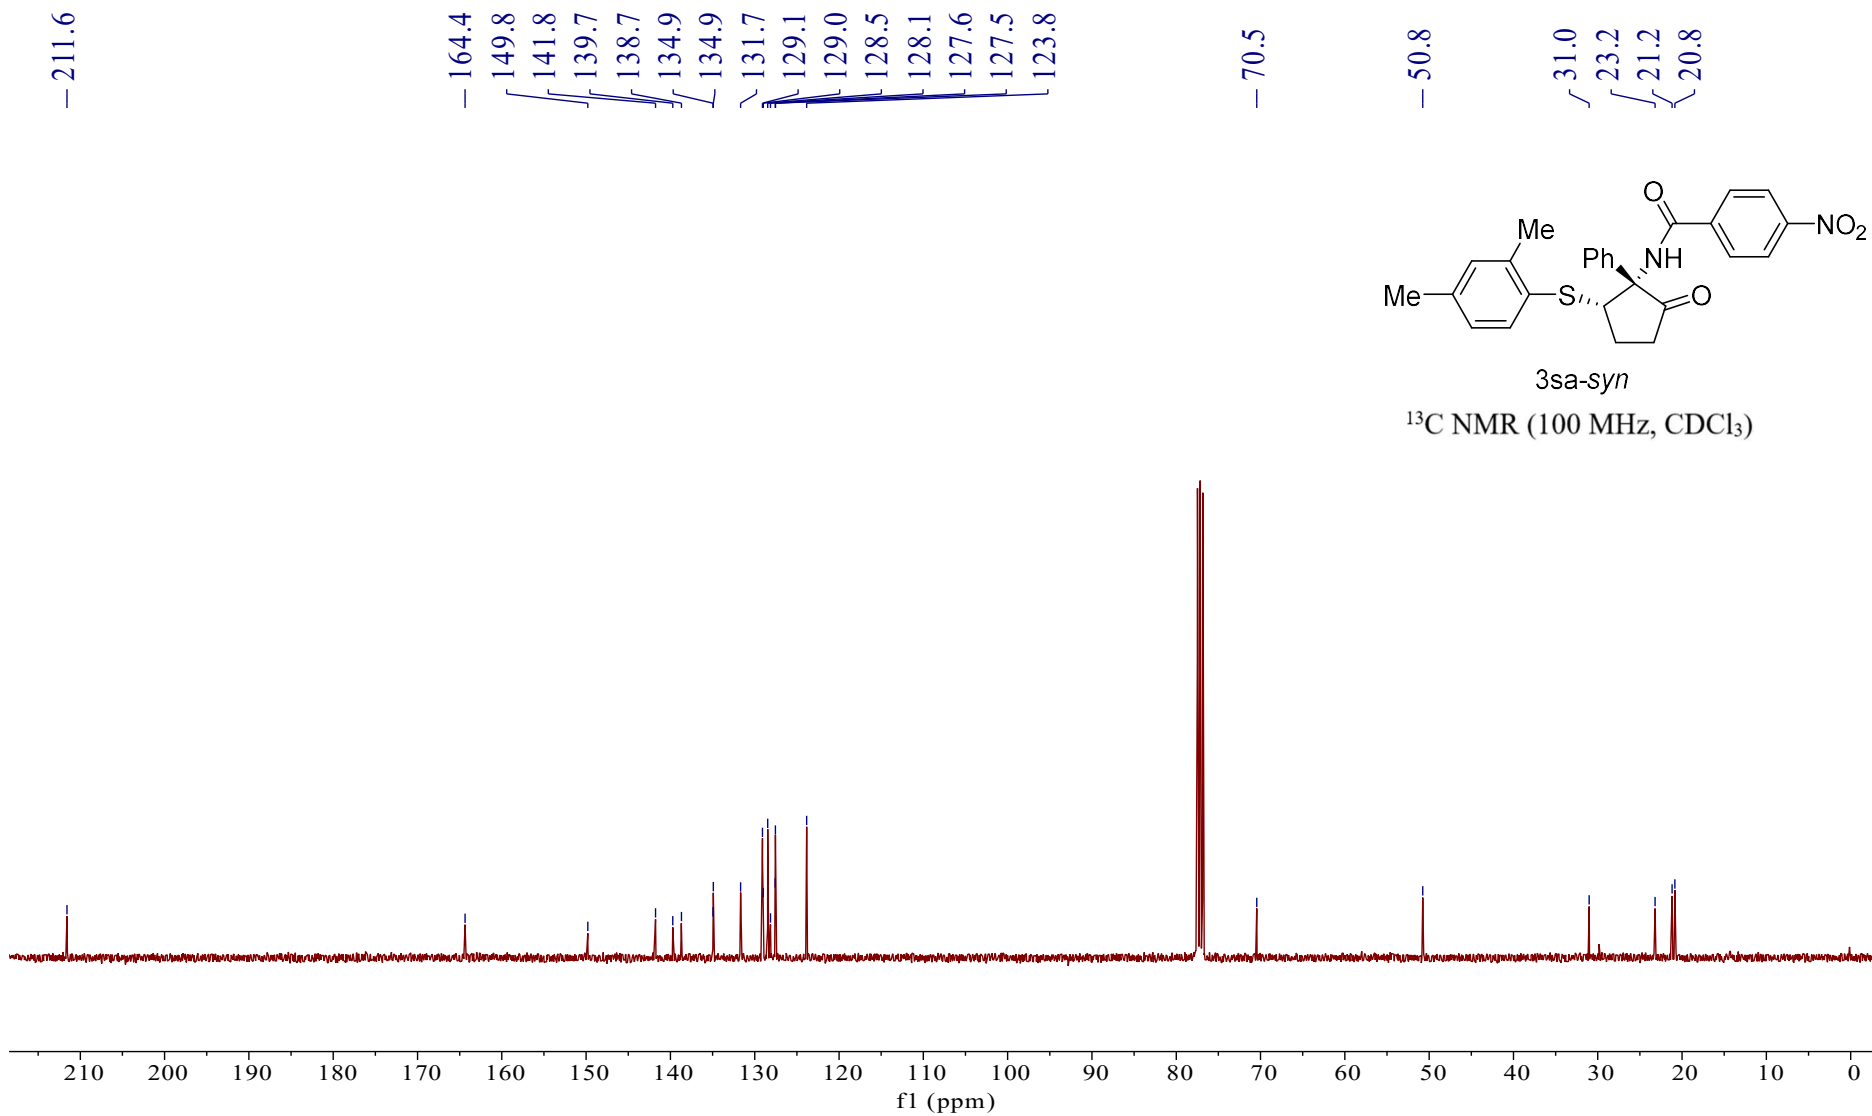

NMR-197

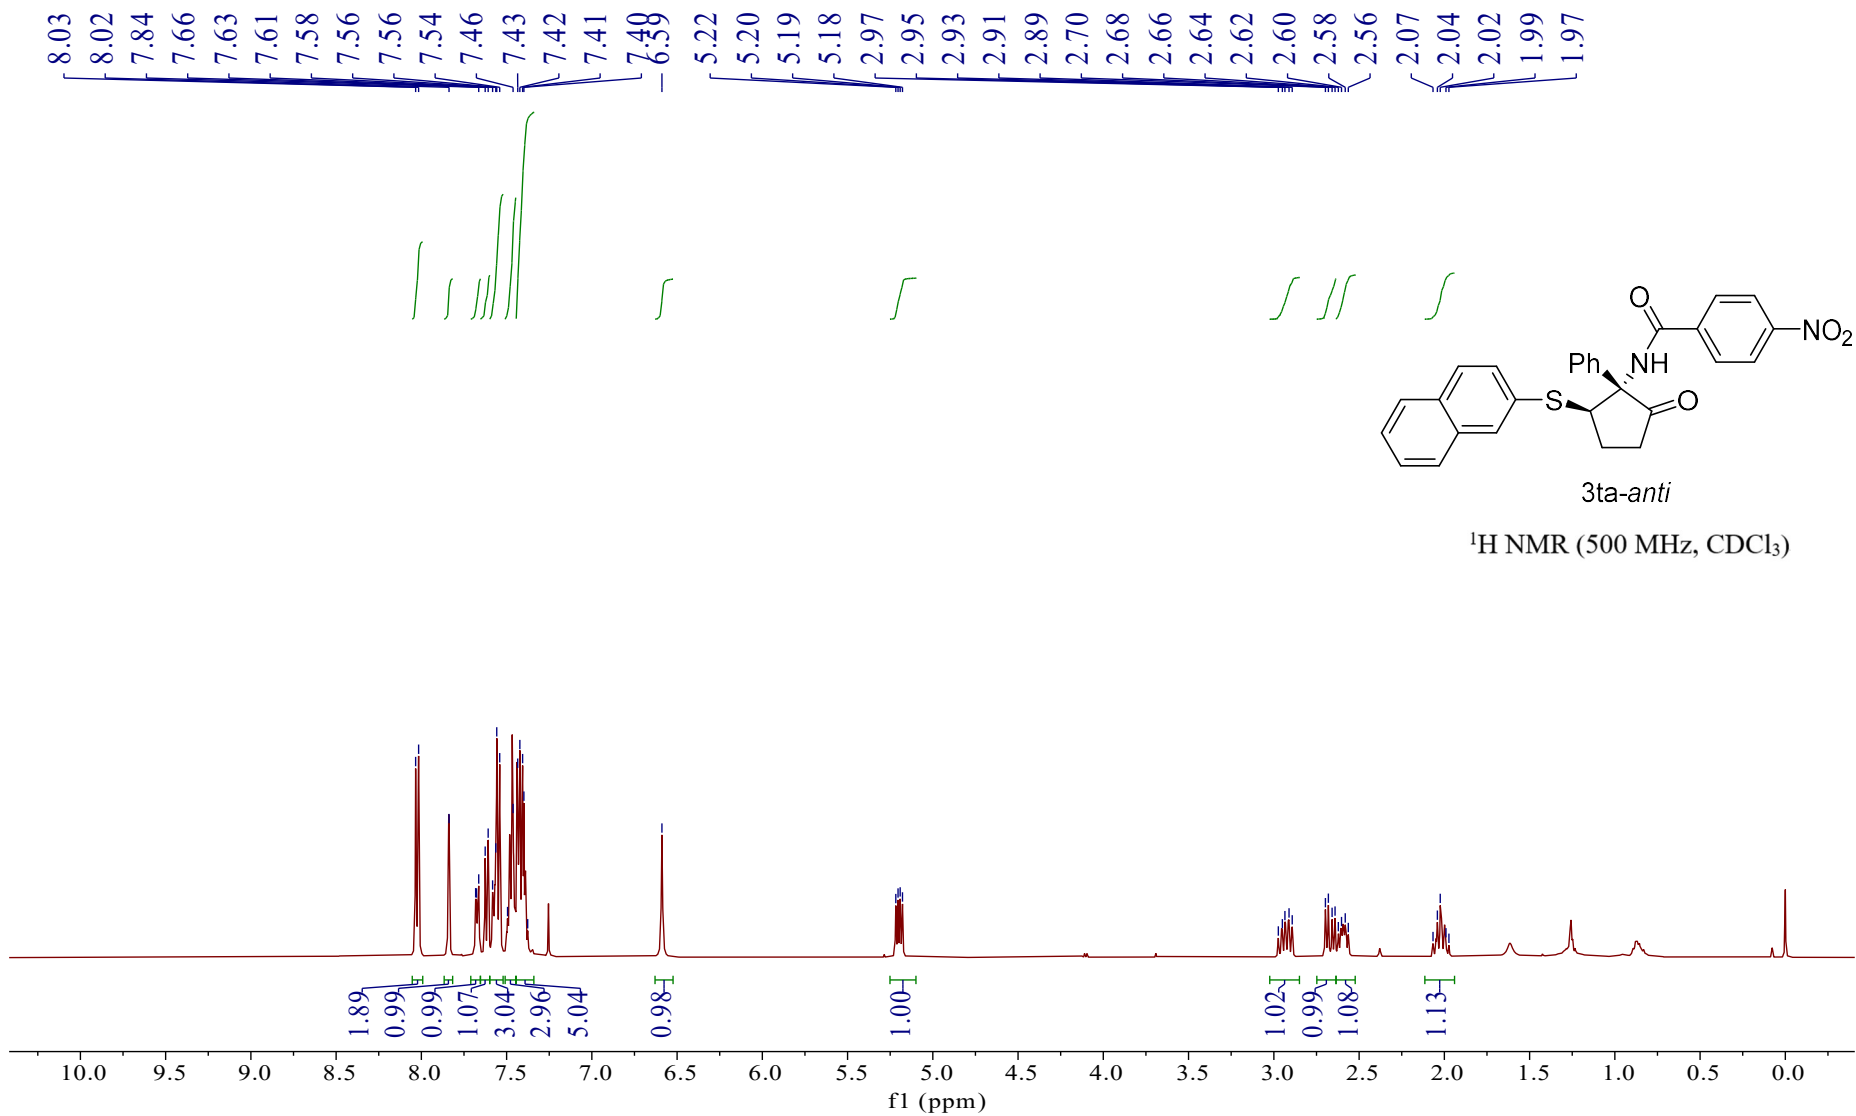

NMR-198

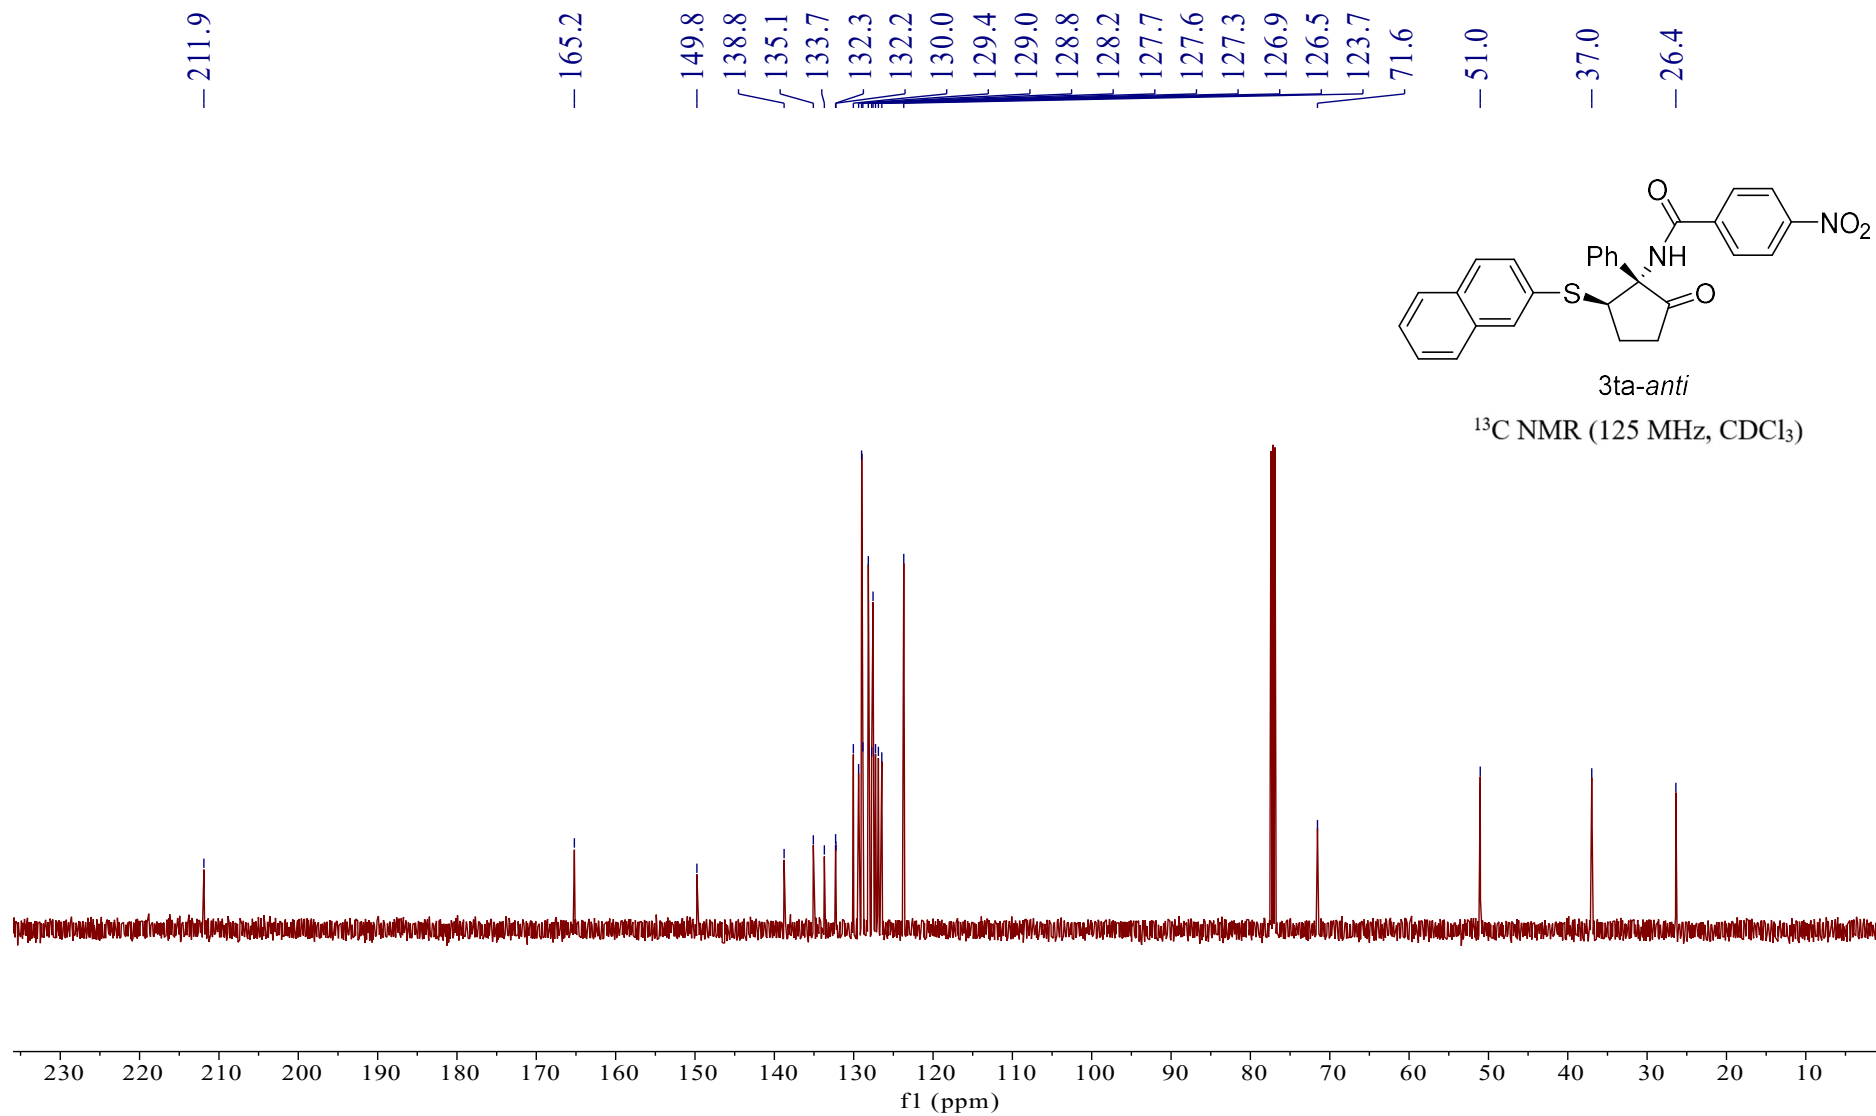

NMR-199

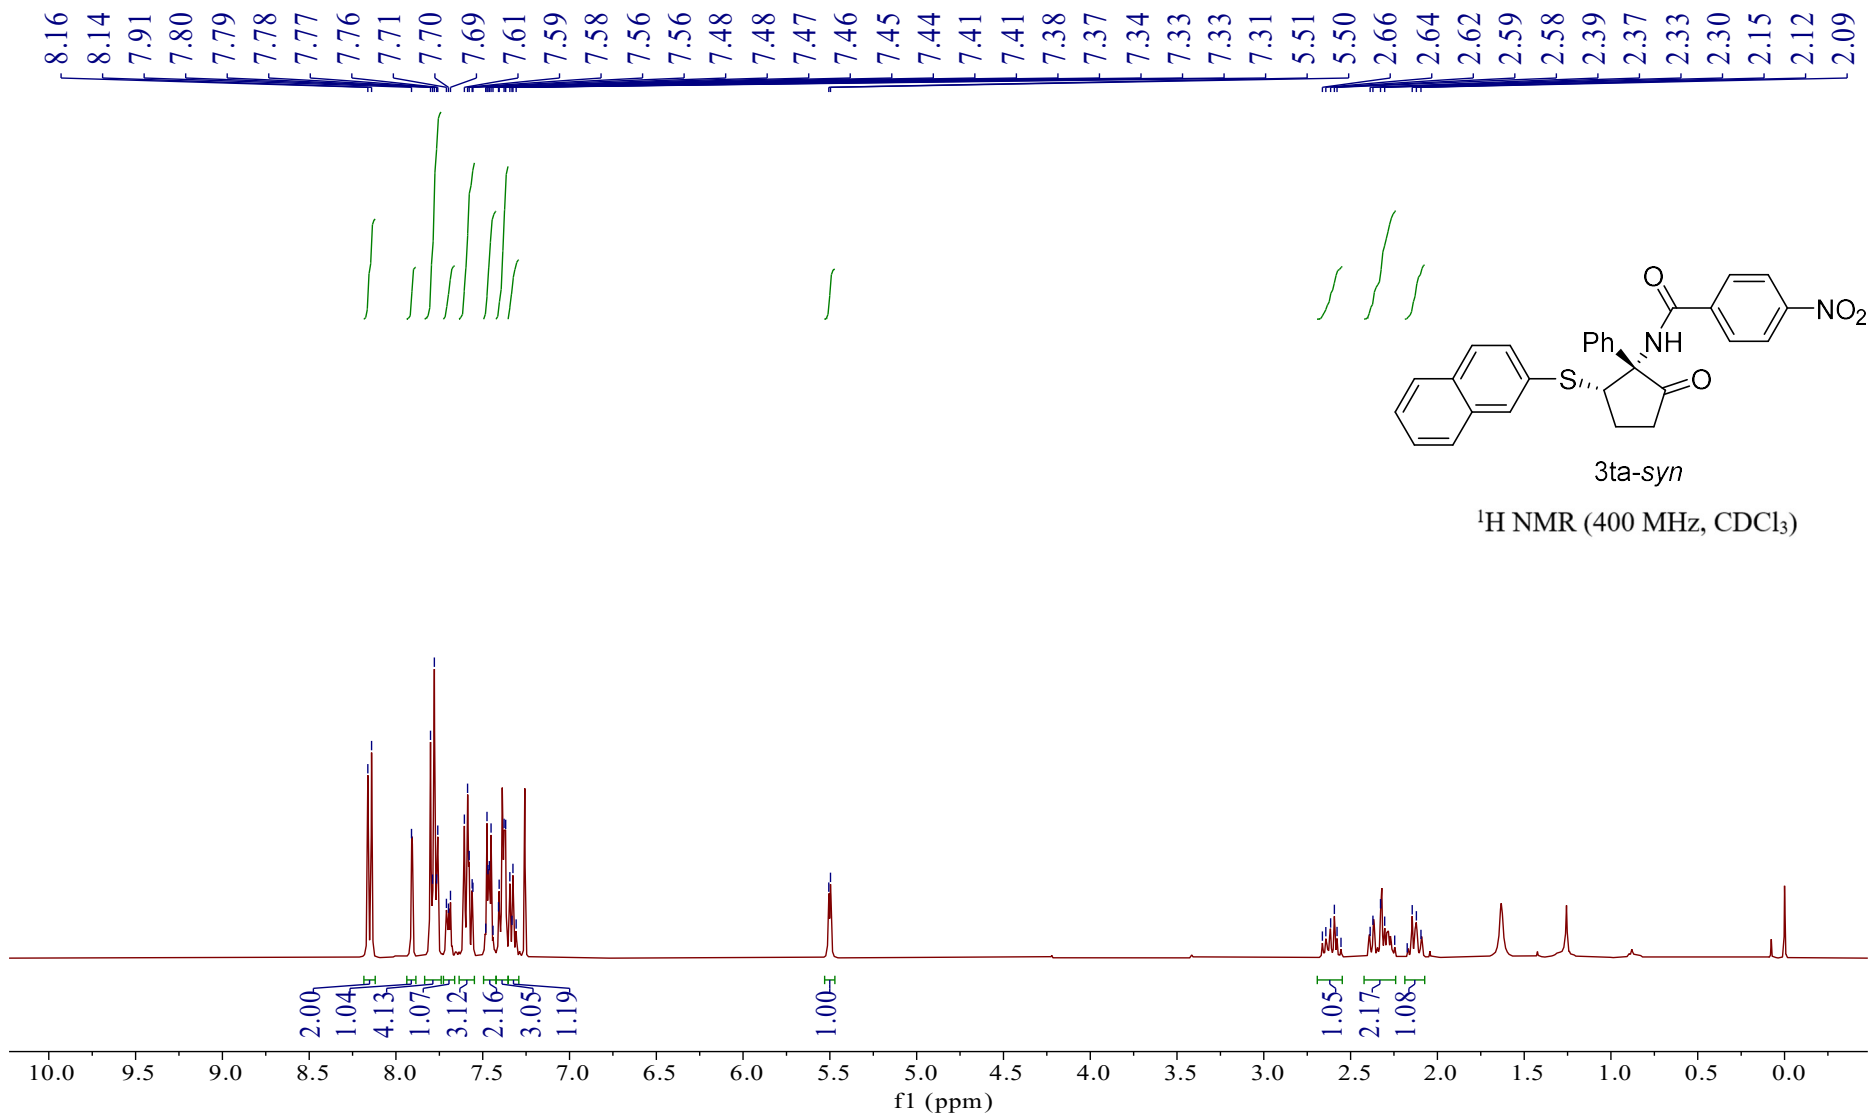

NMR-200

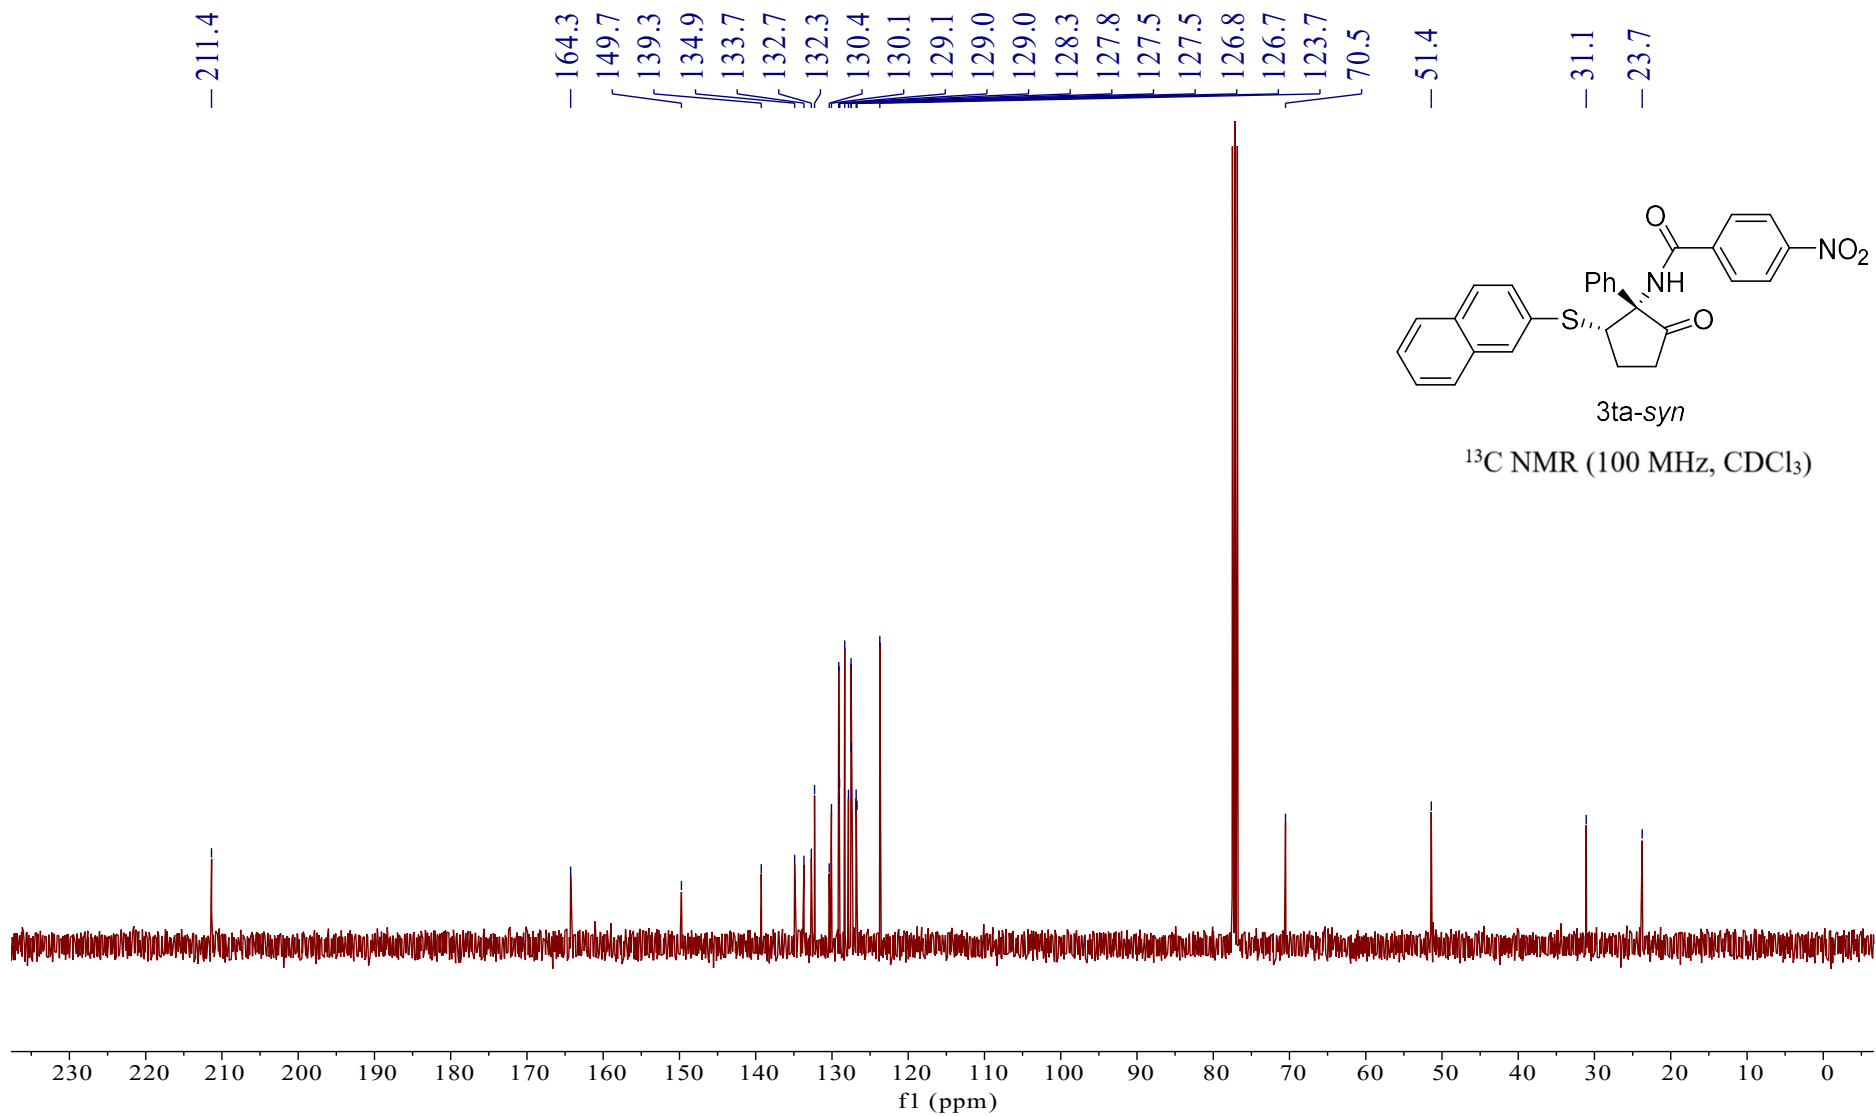

NMR-201

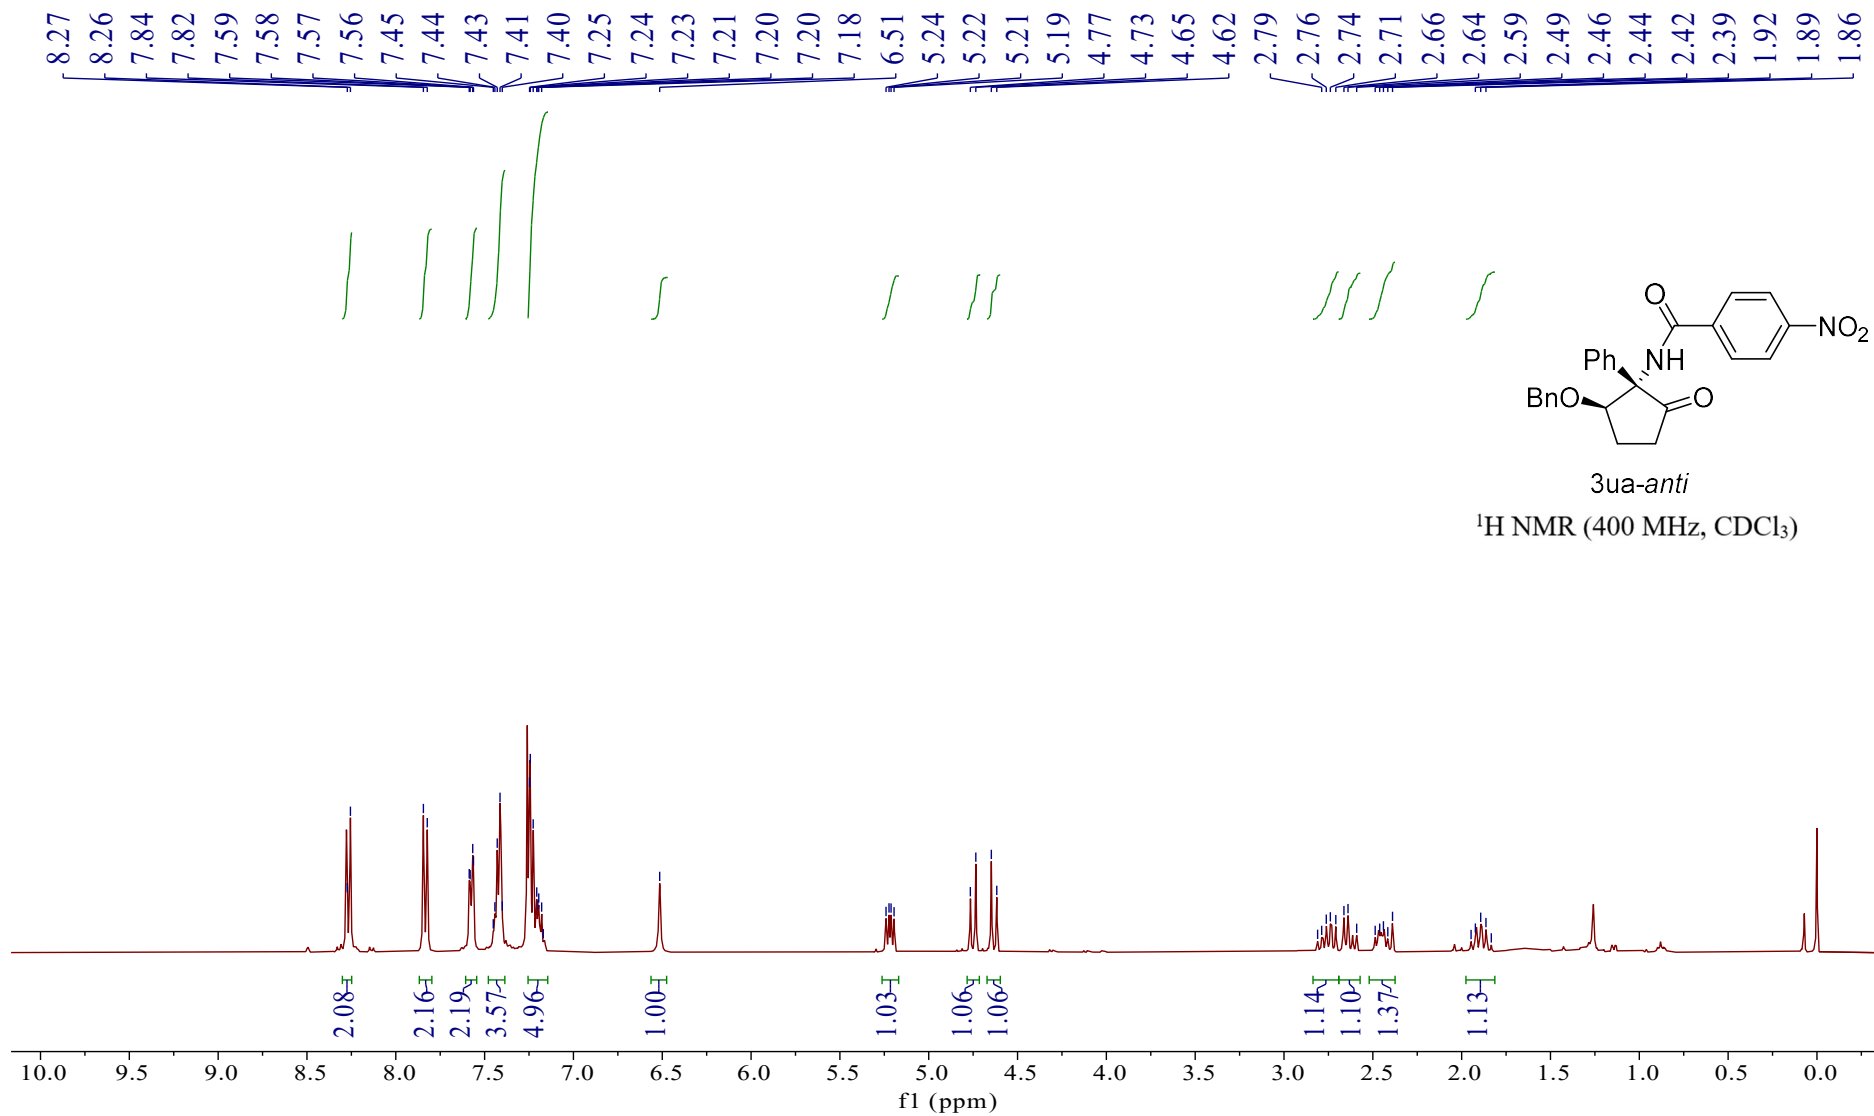

NMR-202

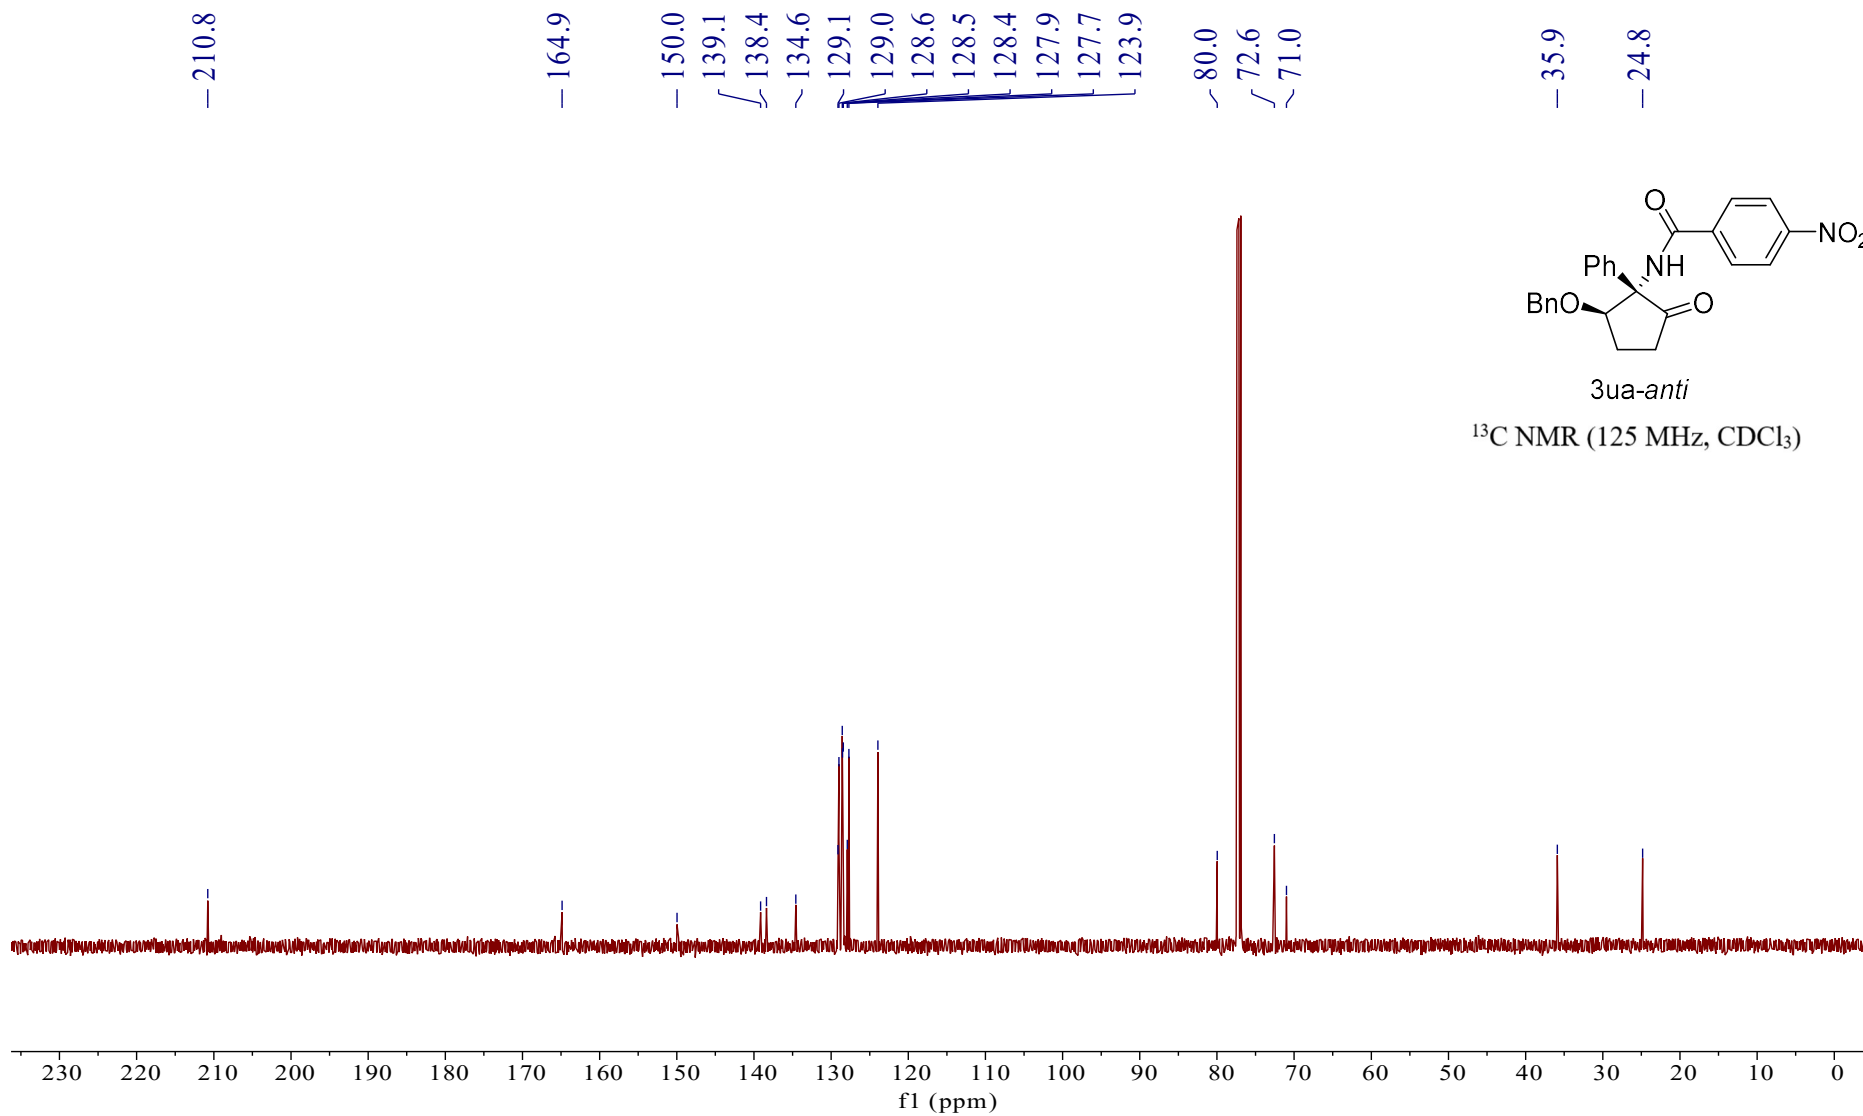

NMR-203

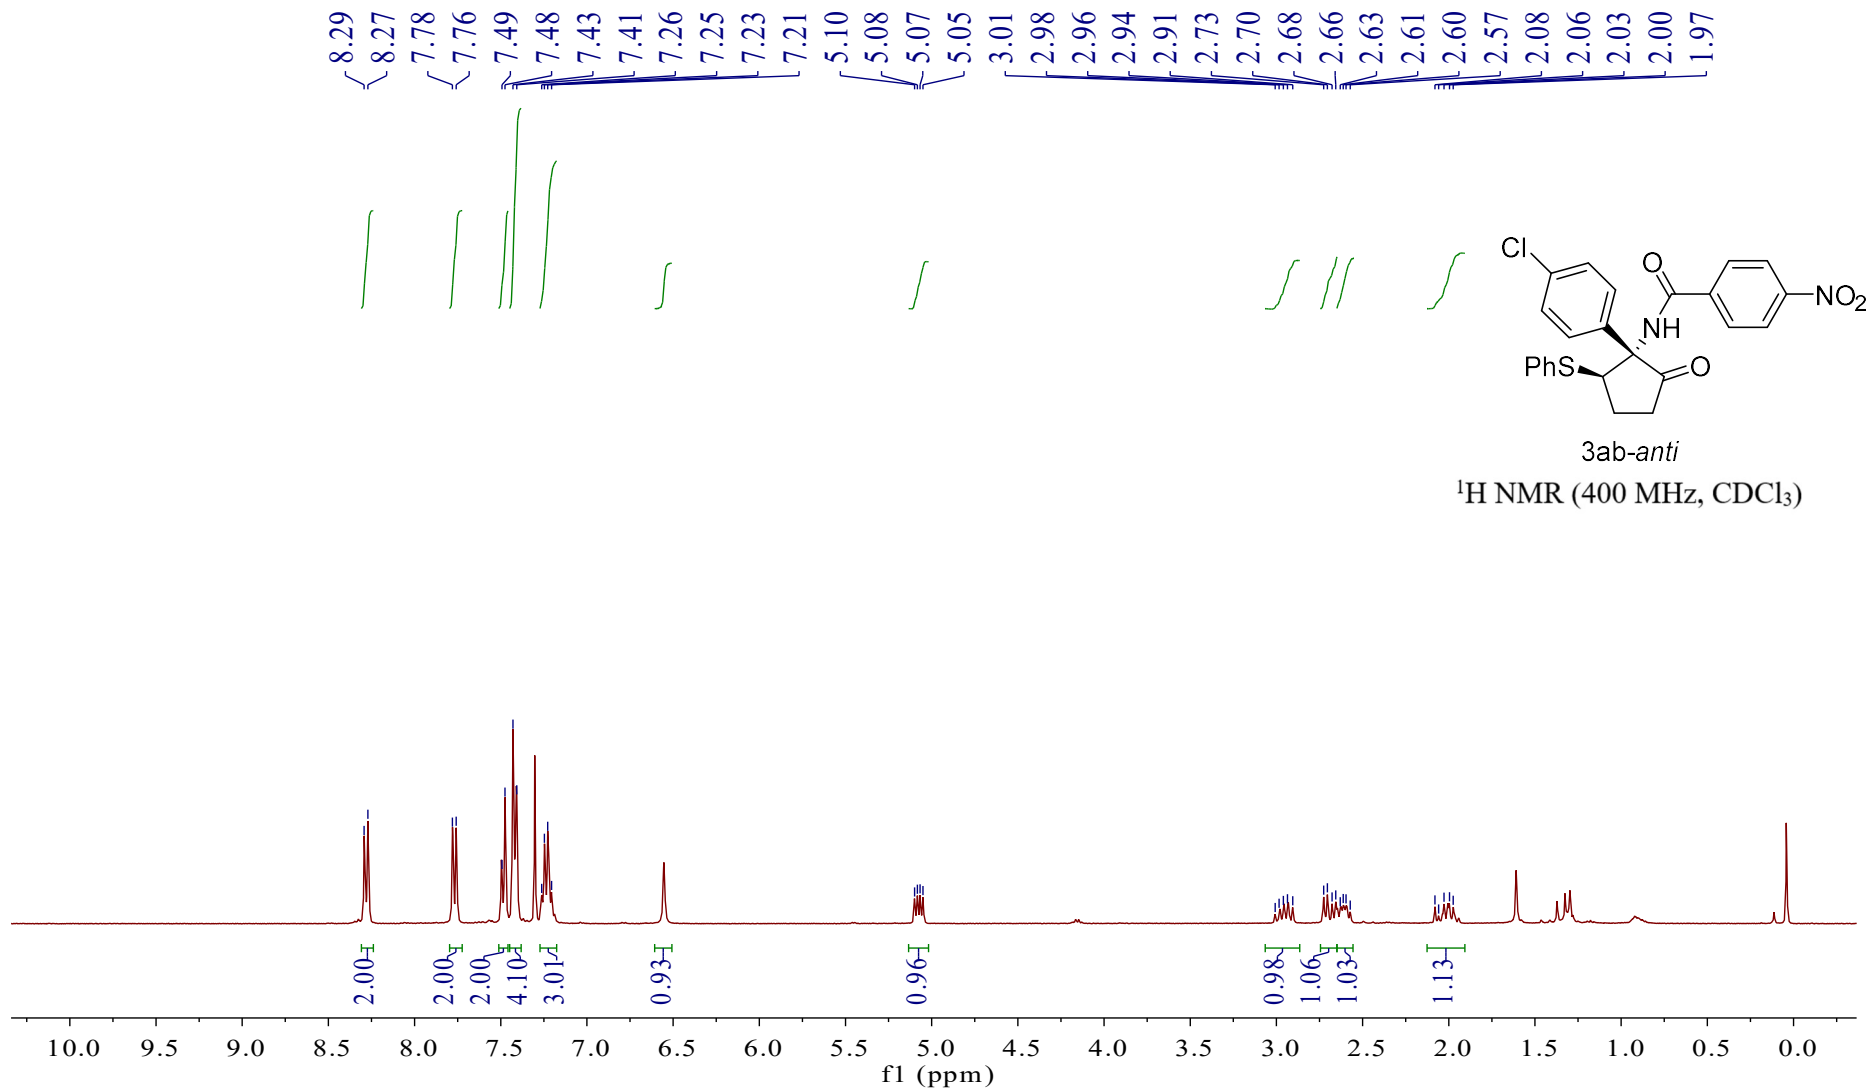

NMR-204



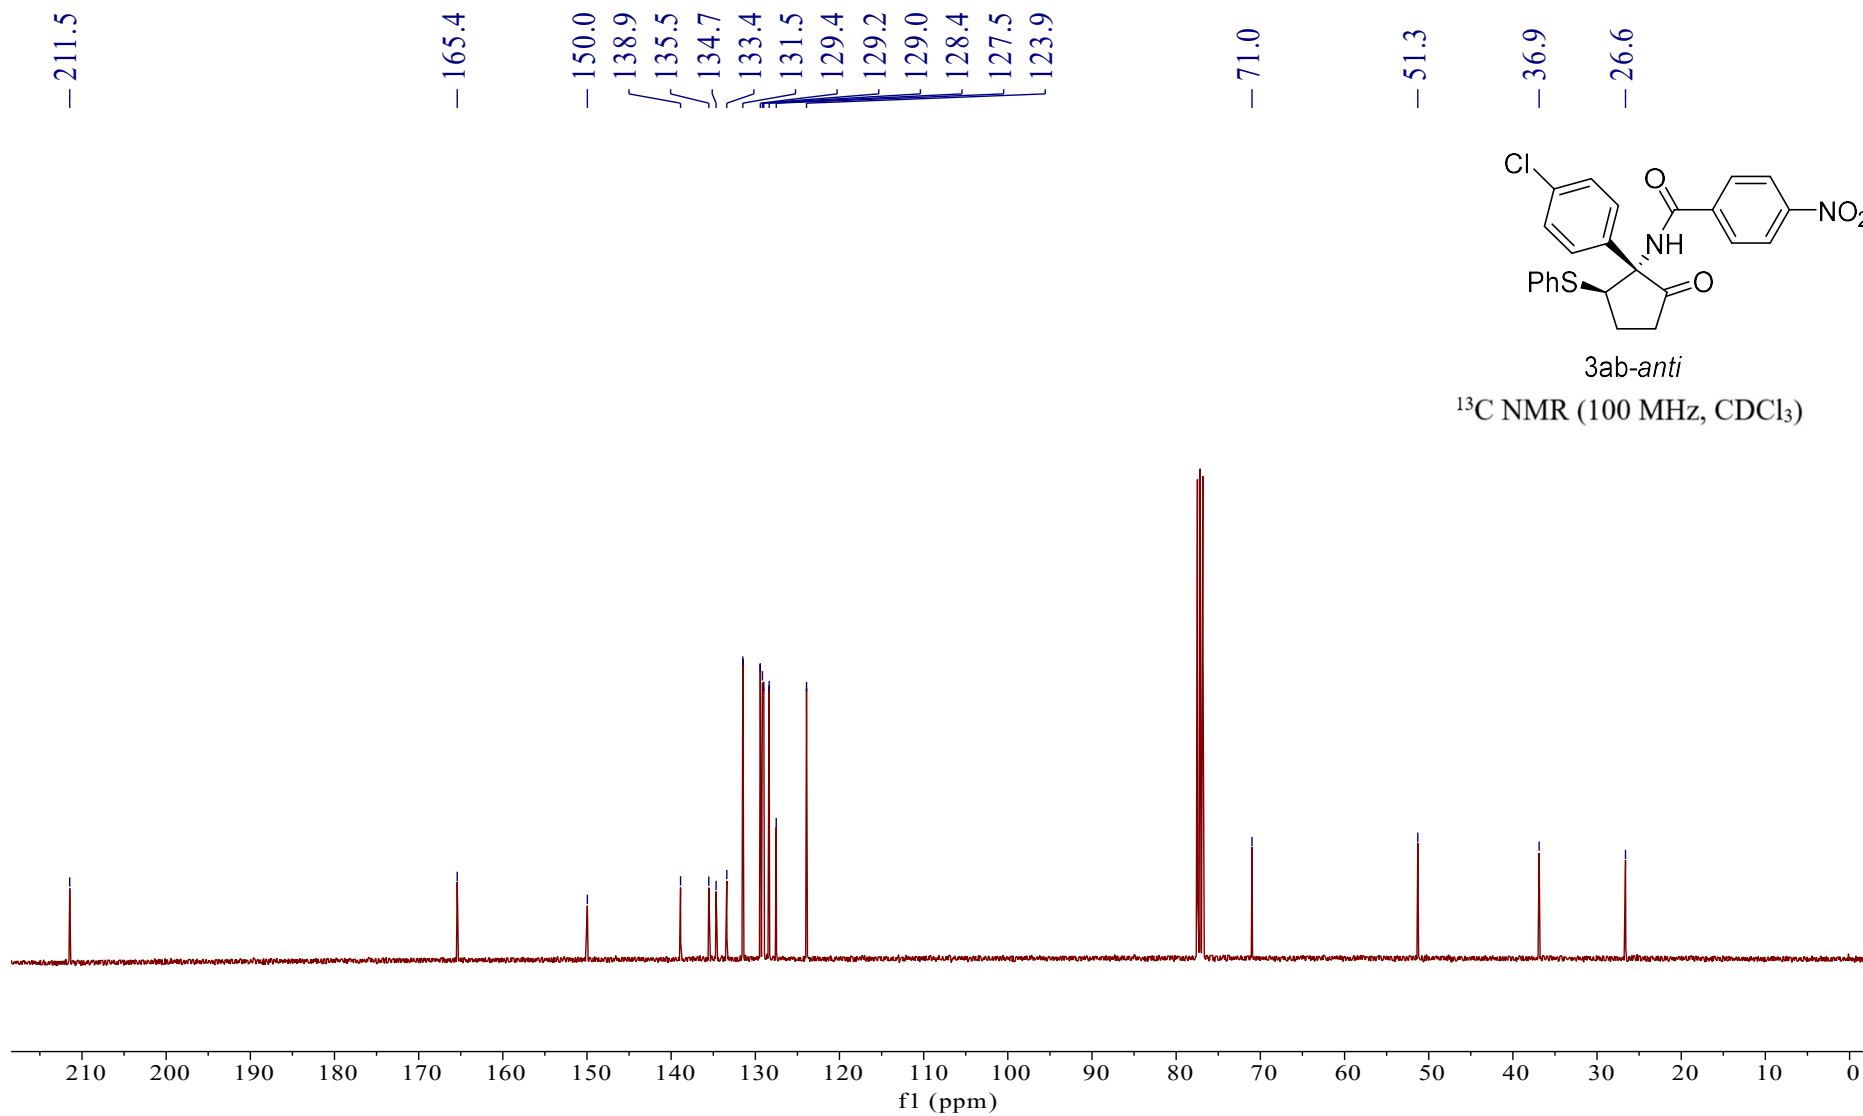

NMR-205

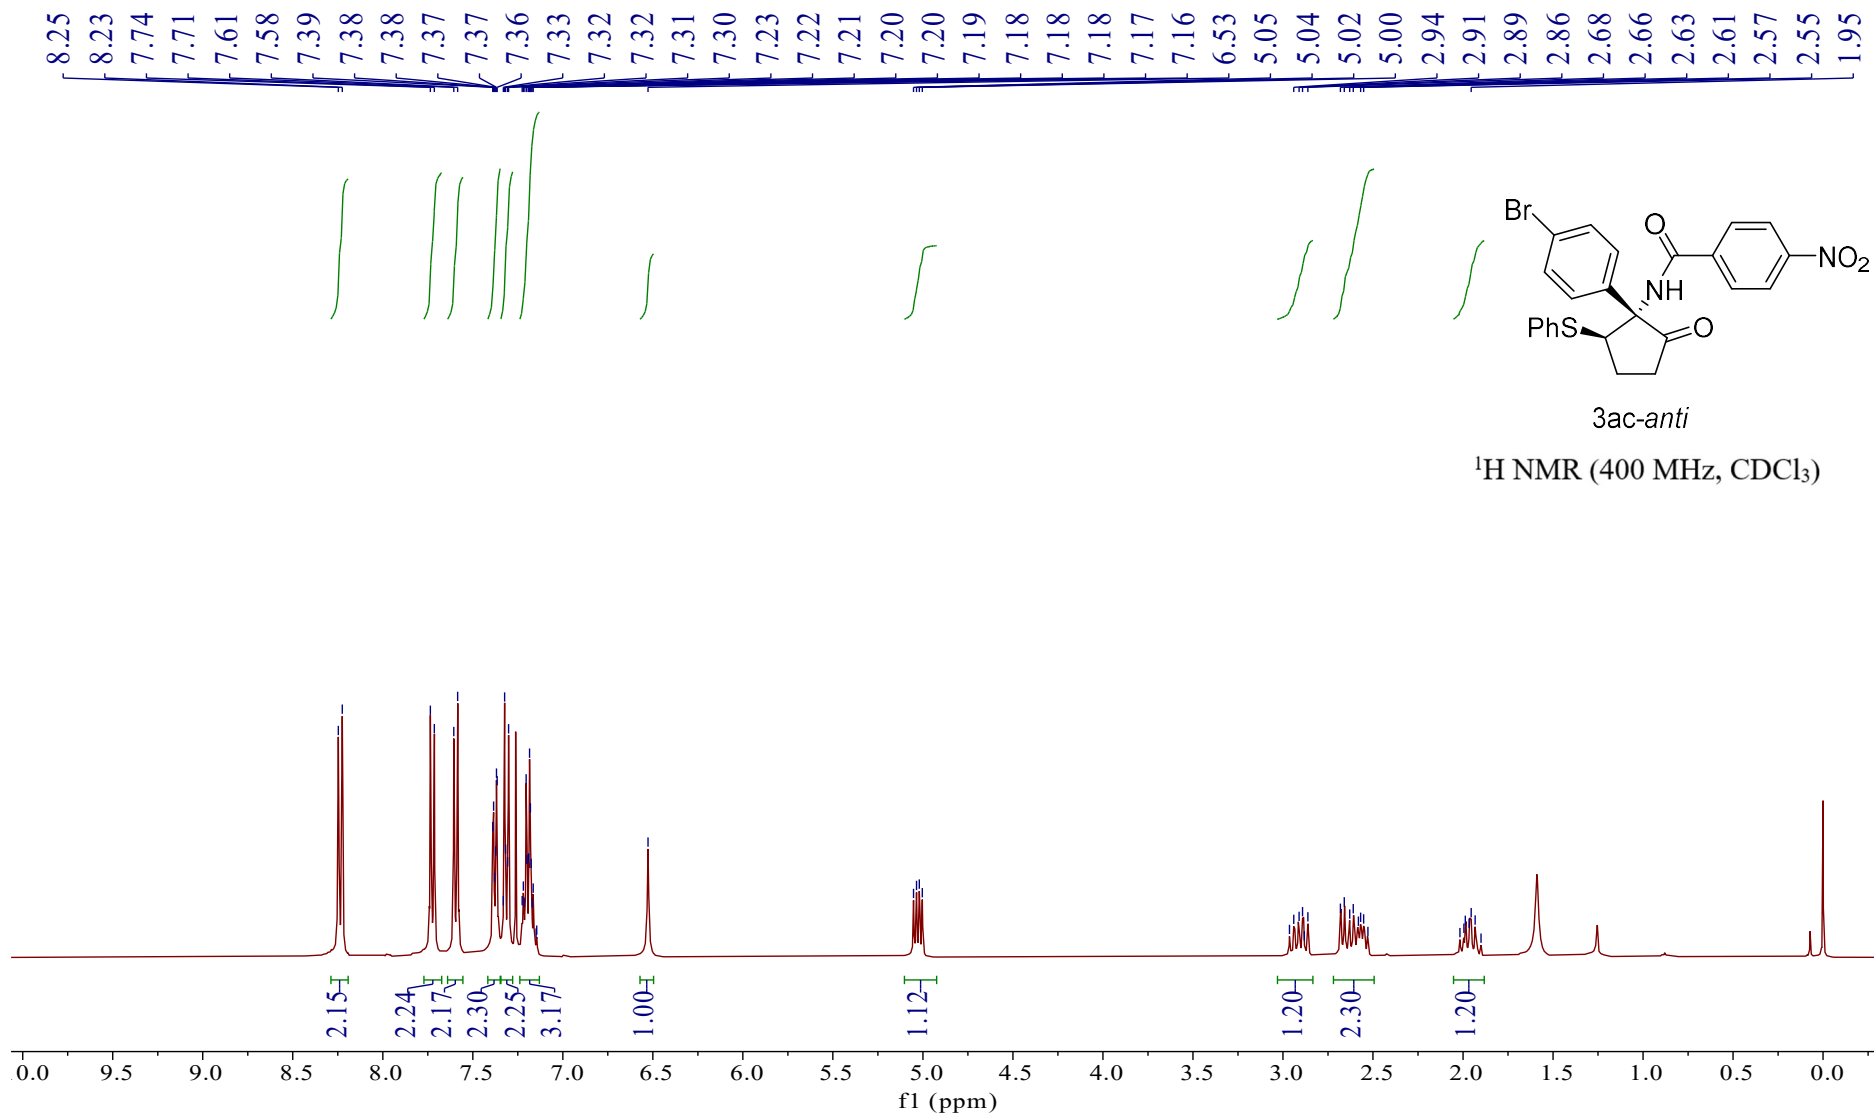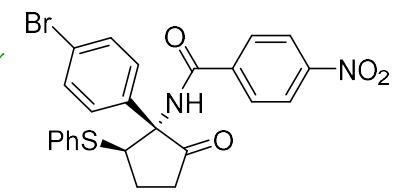

3ac-anti

<sup>1</sup>H NMR (400 MHz, CDCl<sub>3</sub>)

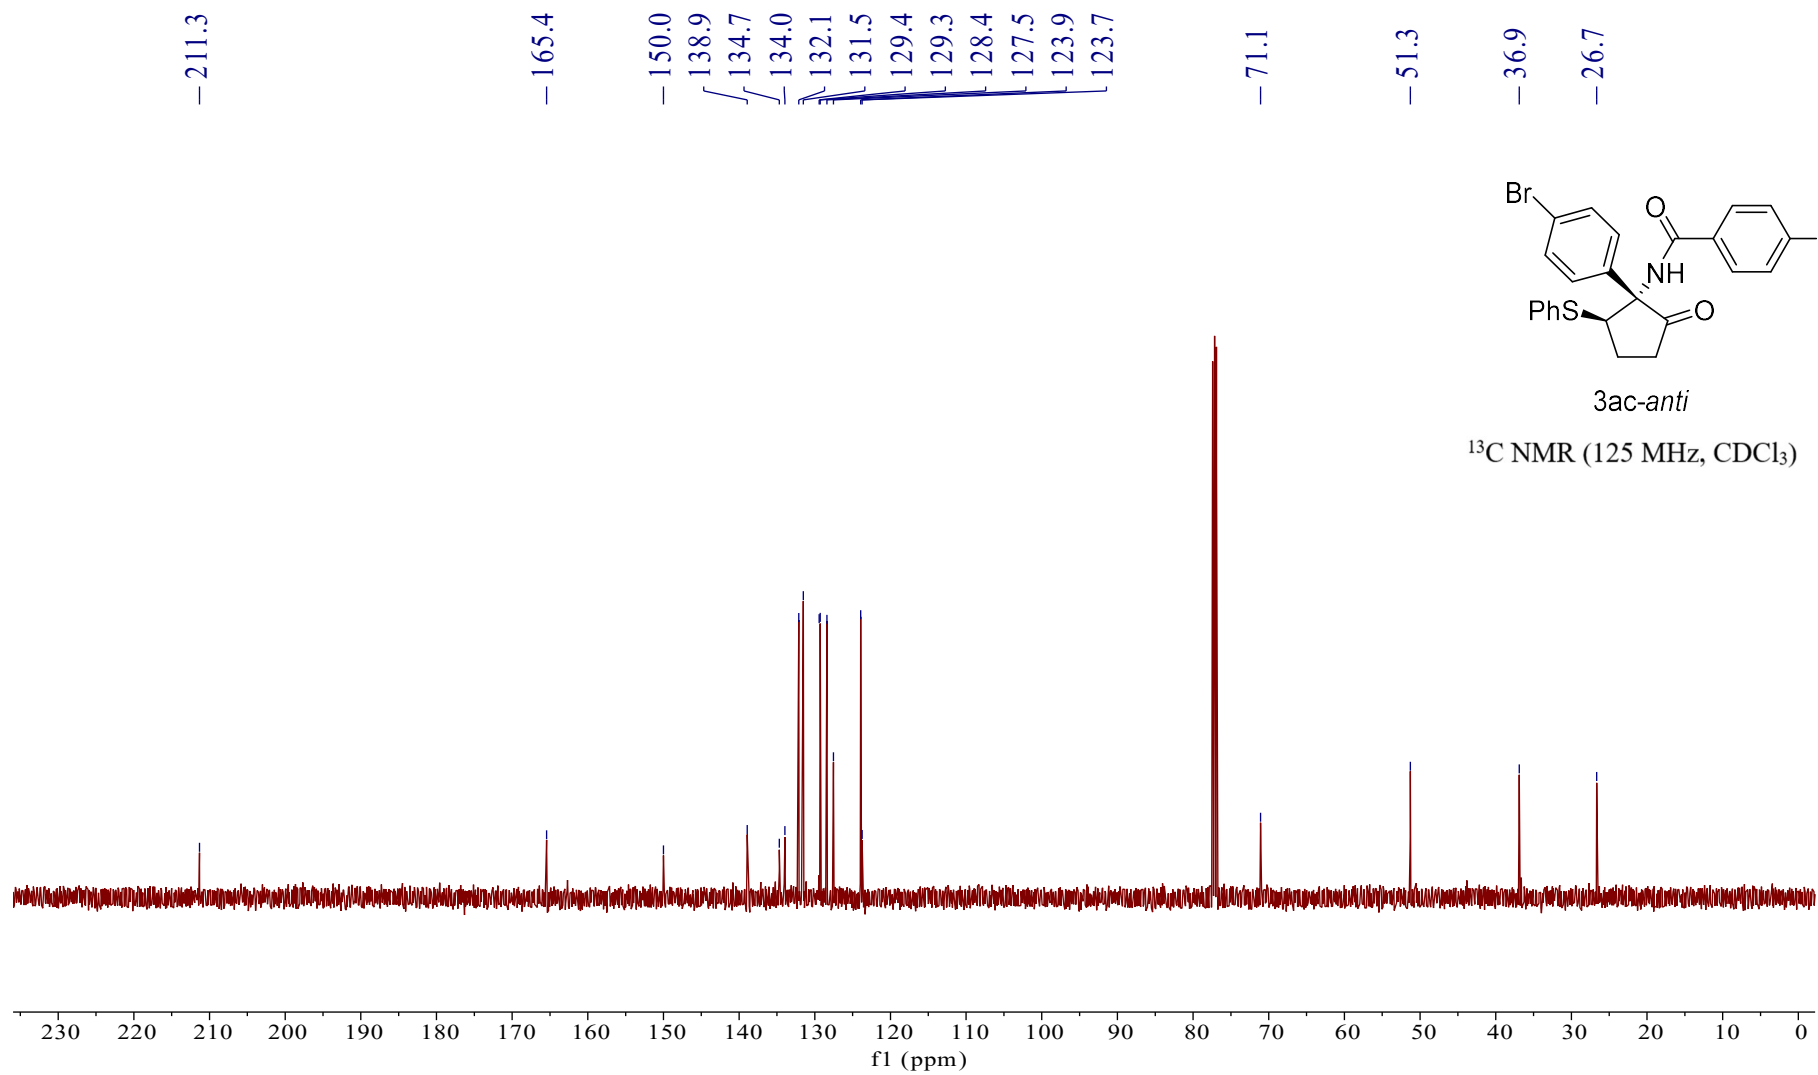

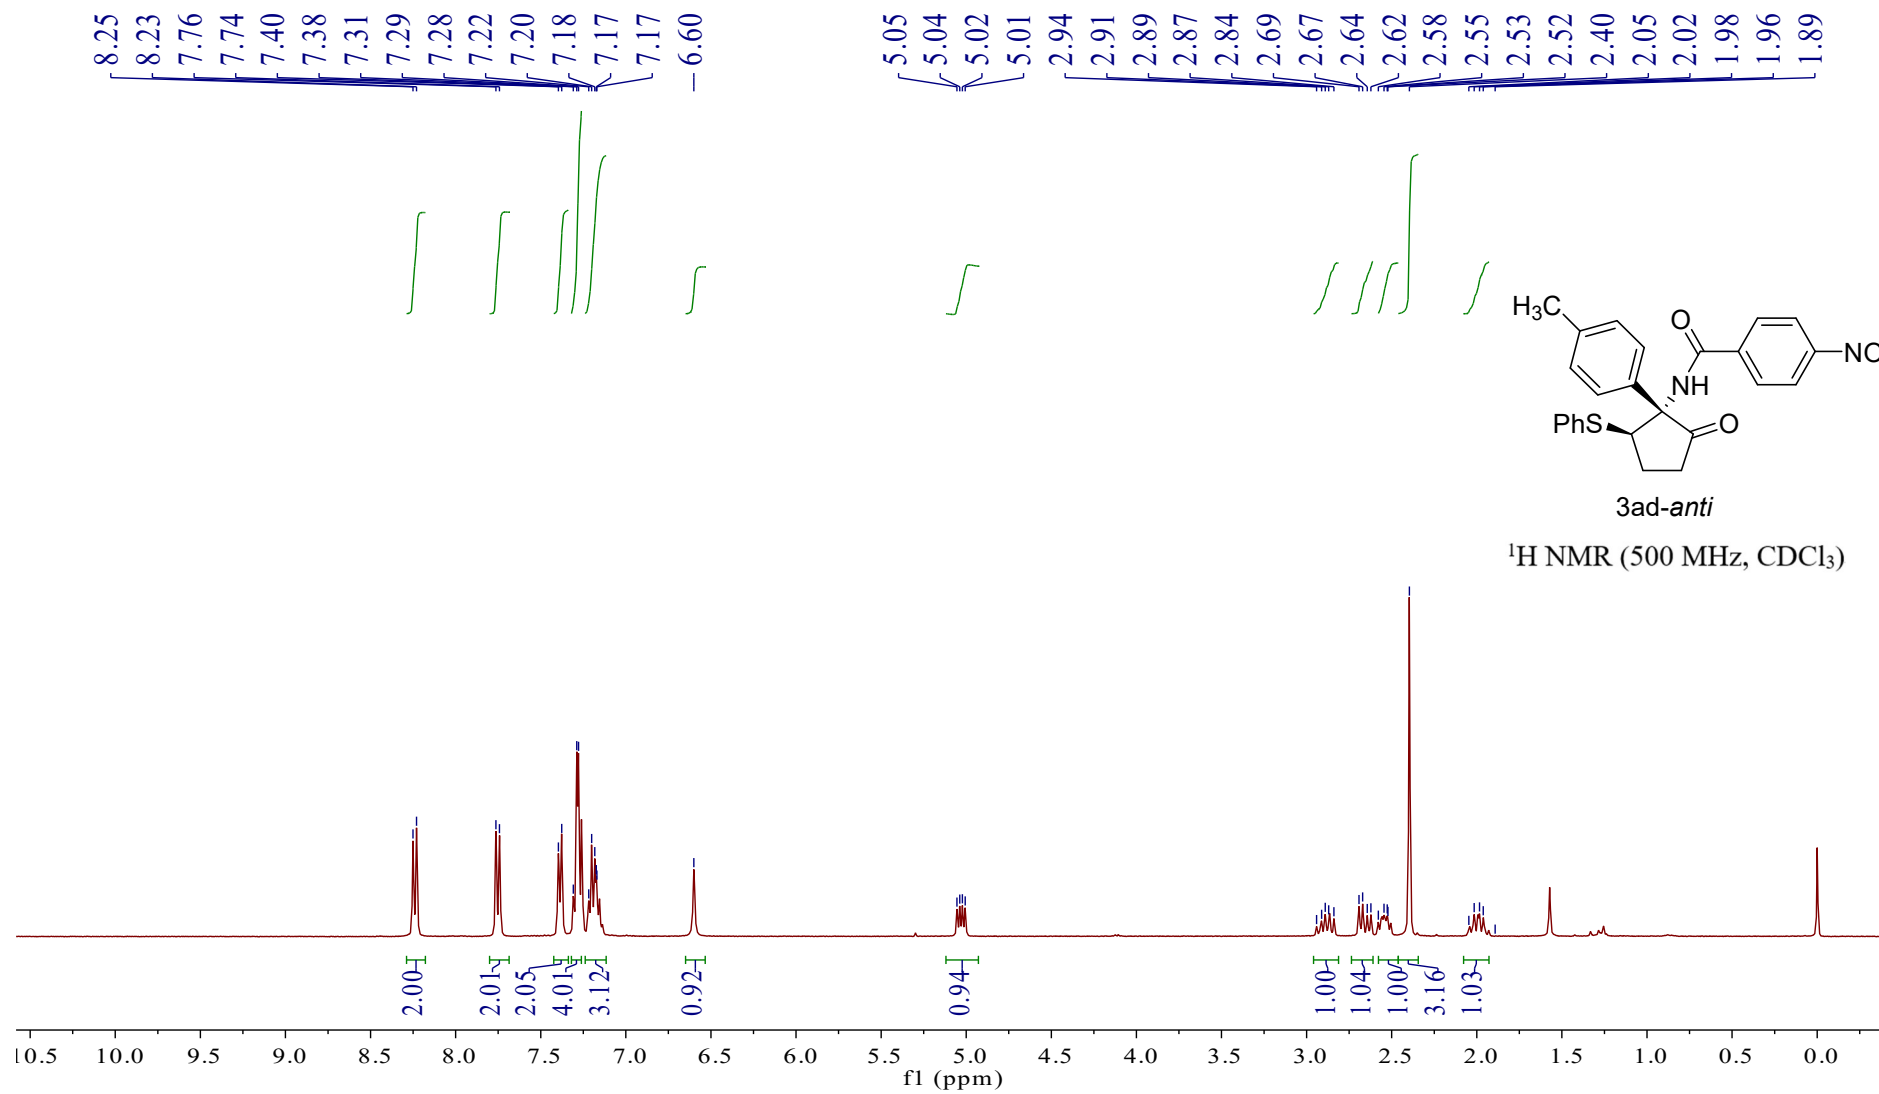

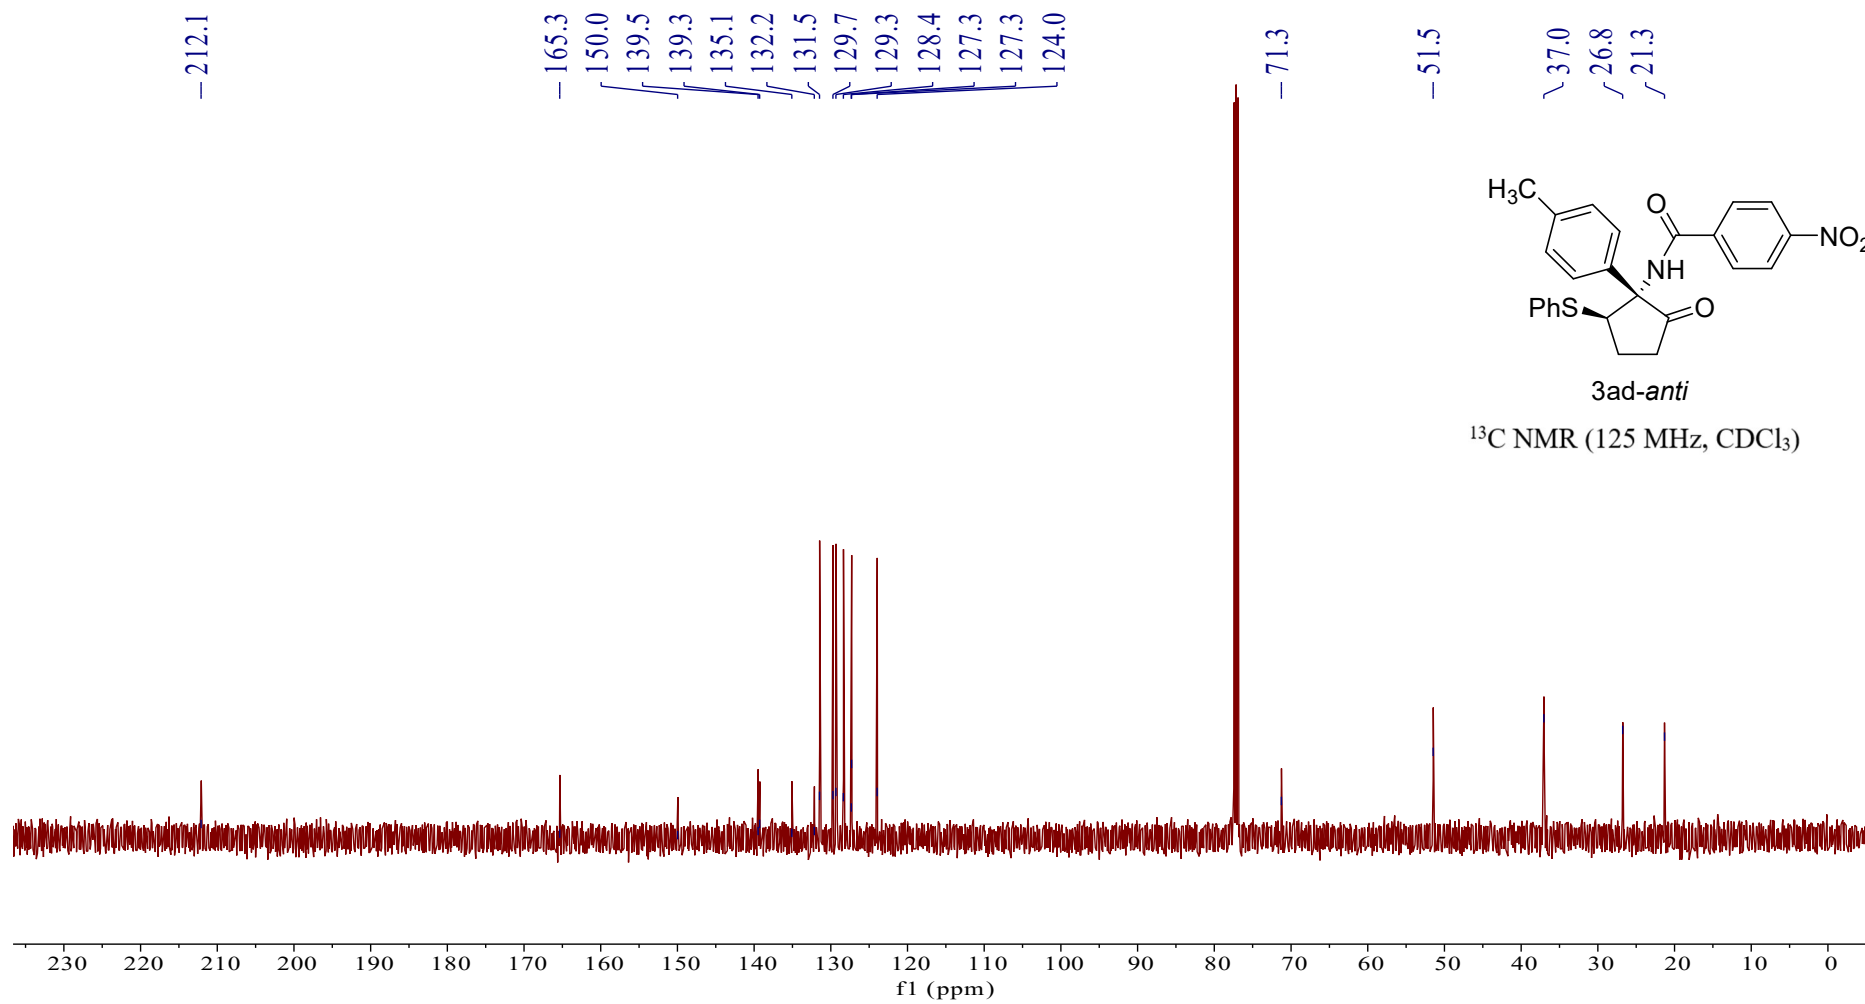

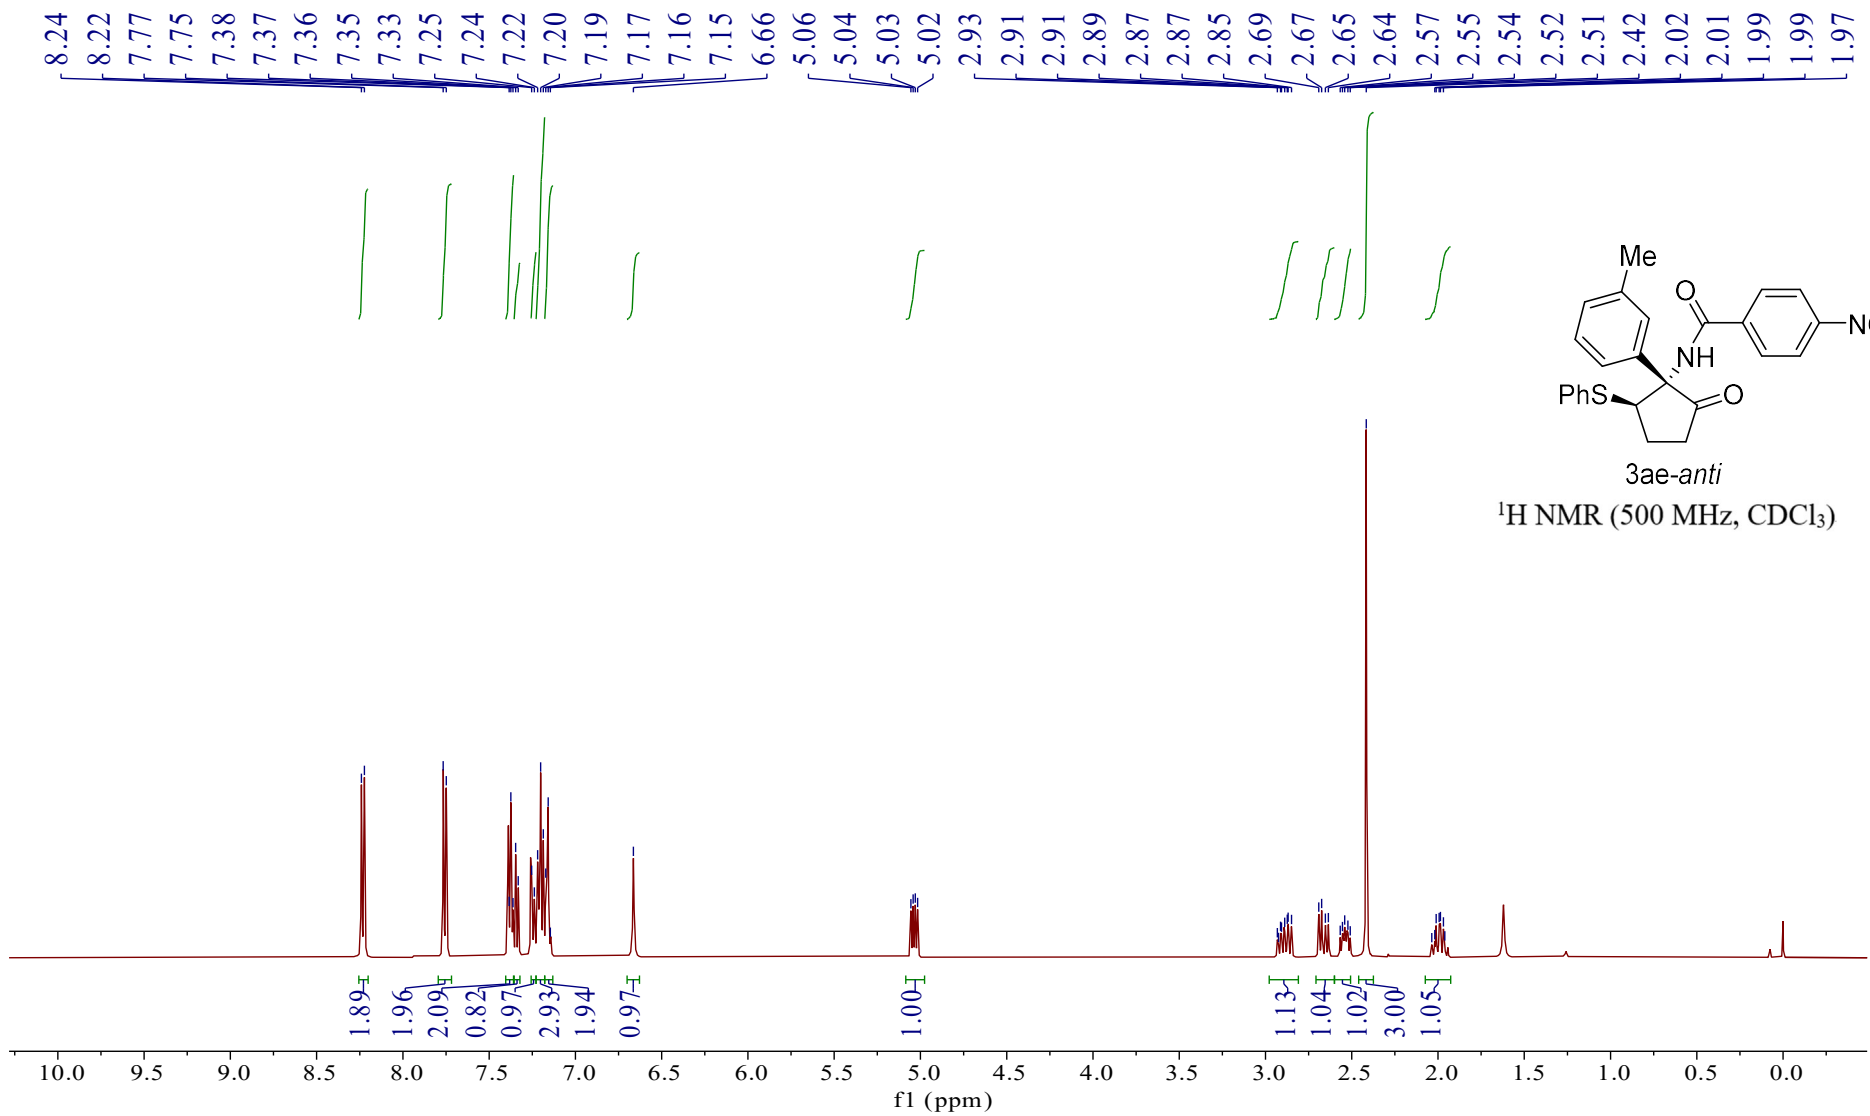

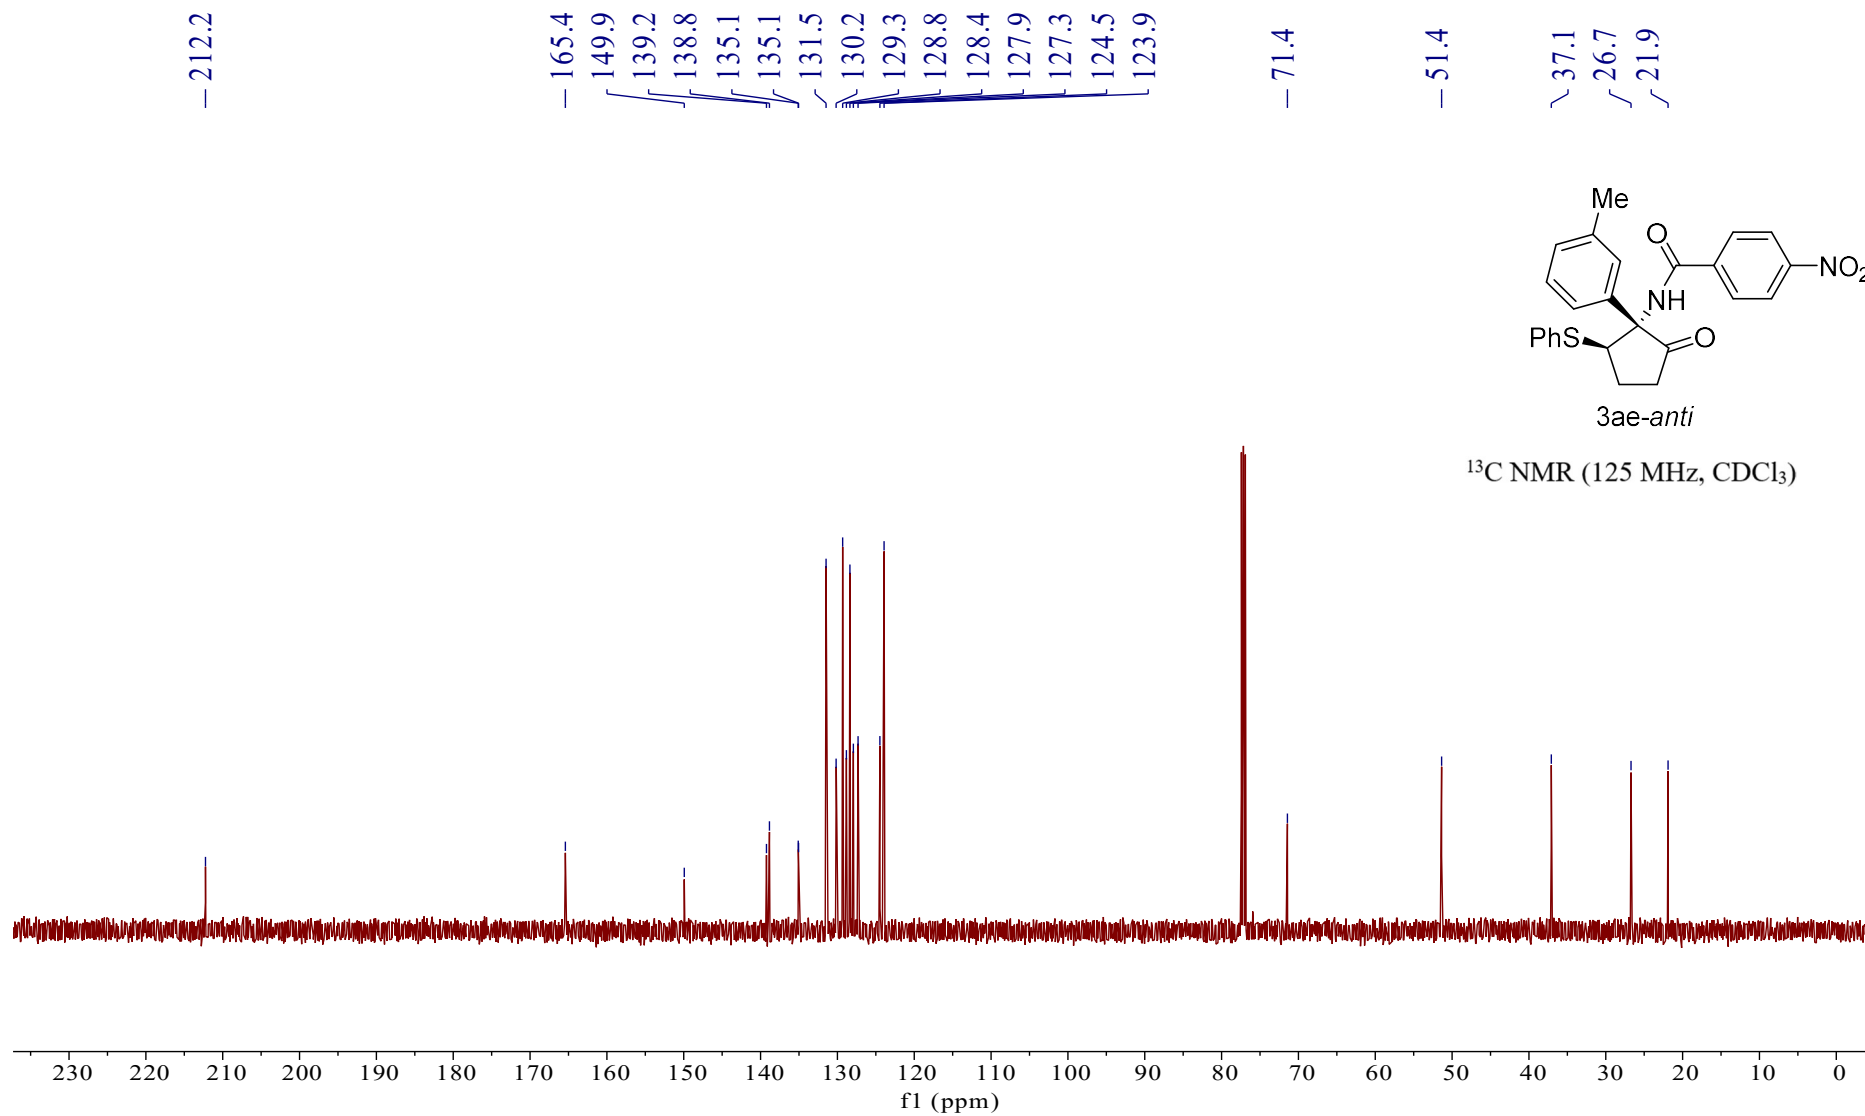

NMR-211

8.29  
8.26  
7.87  
7.85  
7.33  
7.33  
7.31  
7.31  
7.31  
7.25  
7.24  
7.23  
7.21  
7.19  
7.19  
7.17  
7.15  
7.13  
7.11  
6.95  
5.04  
5.02  
5.02  
5.00  
2.93  
2.88  
2.86  
2.83  
2.78  
2.76  
2.72  
2.70  
2.69  
2.67  
2.66  
2.64  
2.61  
2.22  
2.19  
2.19  
2.17  
2.14  
2.11

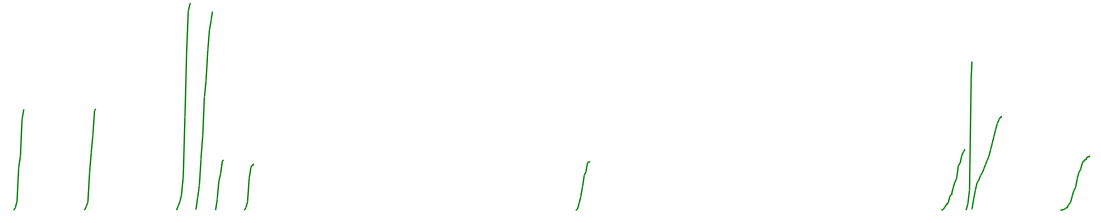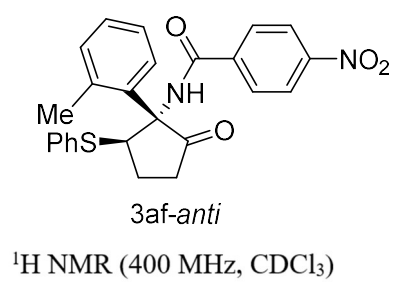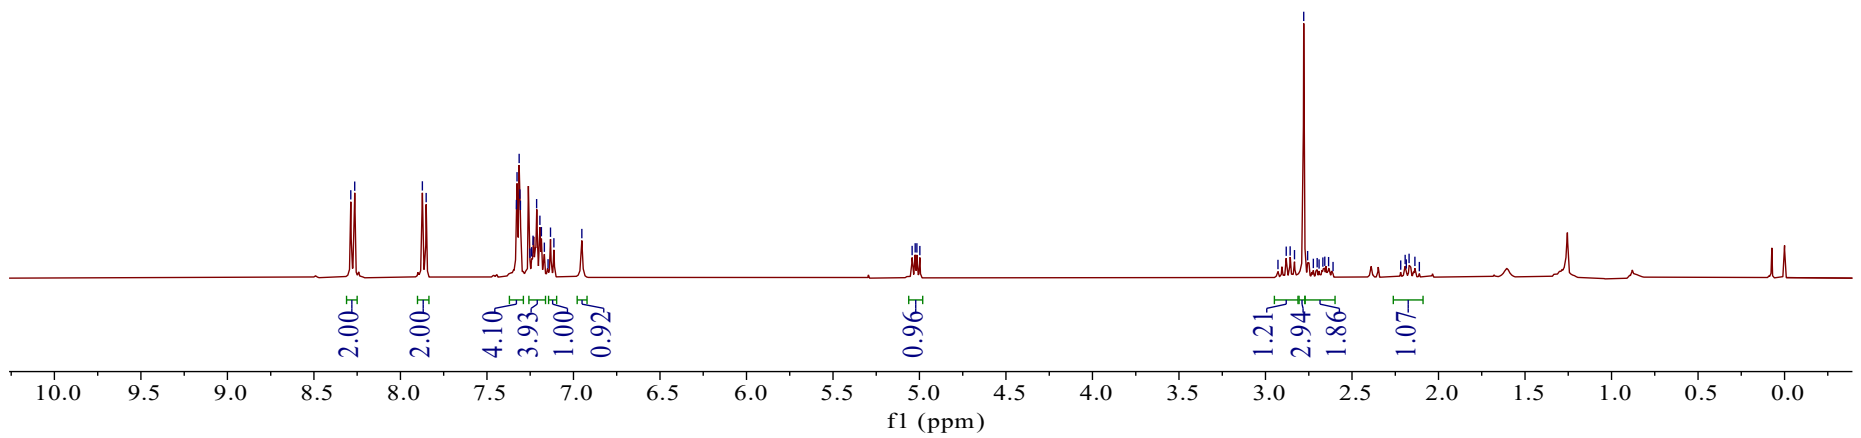



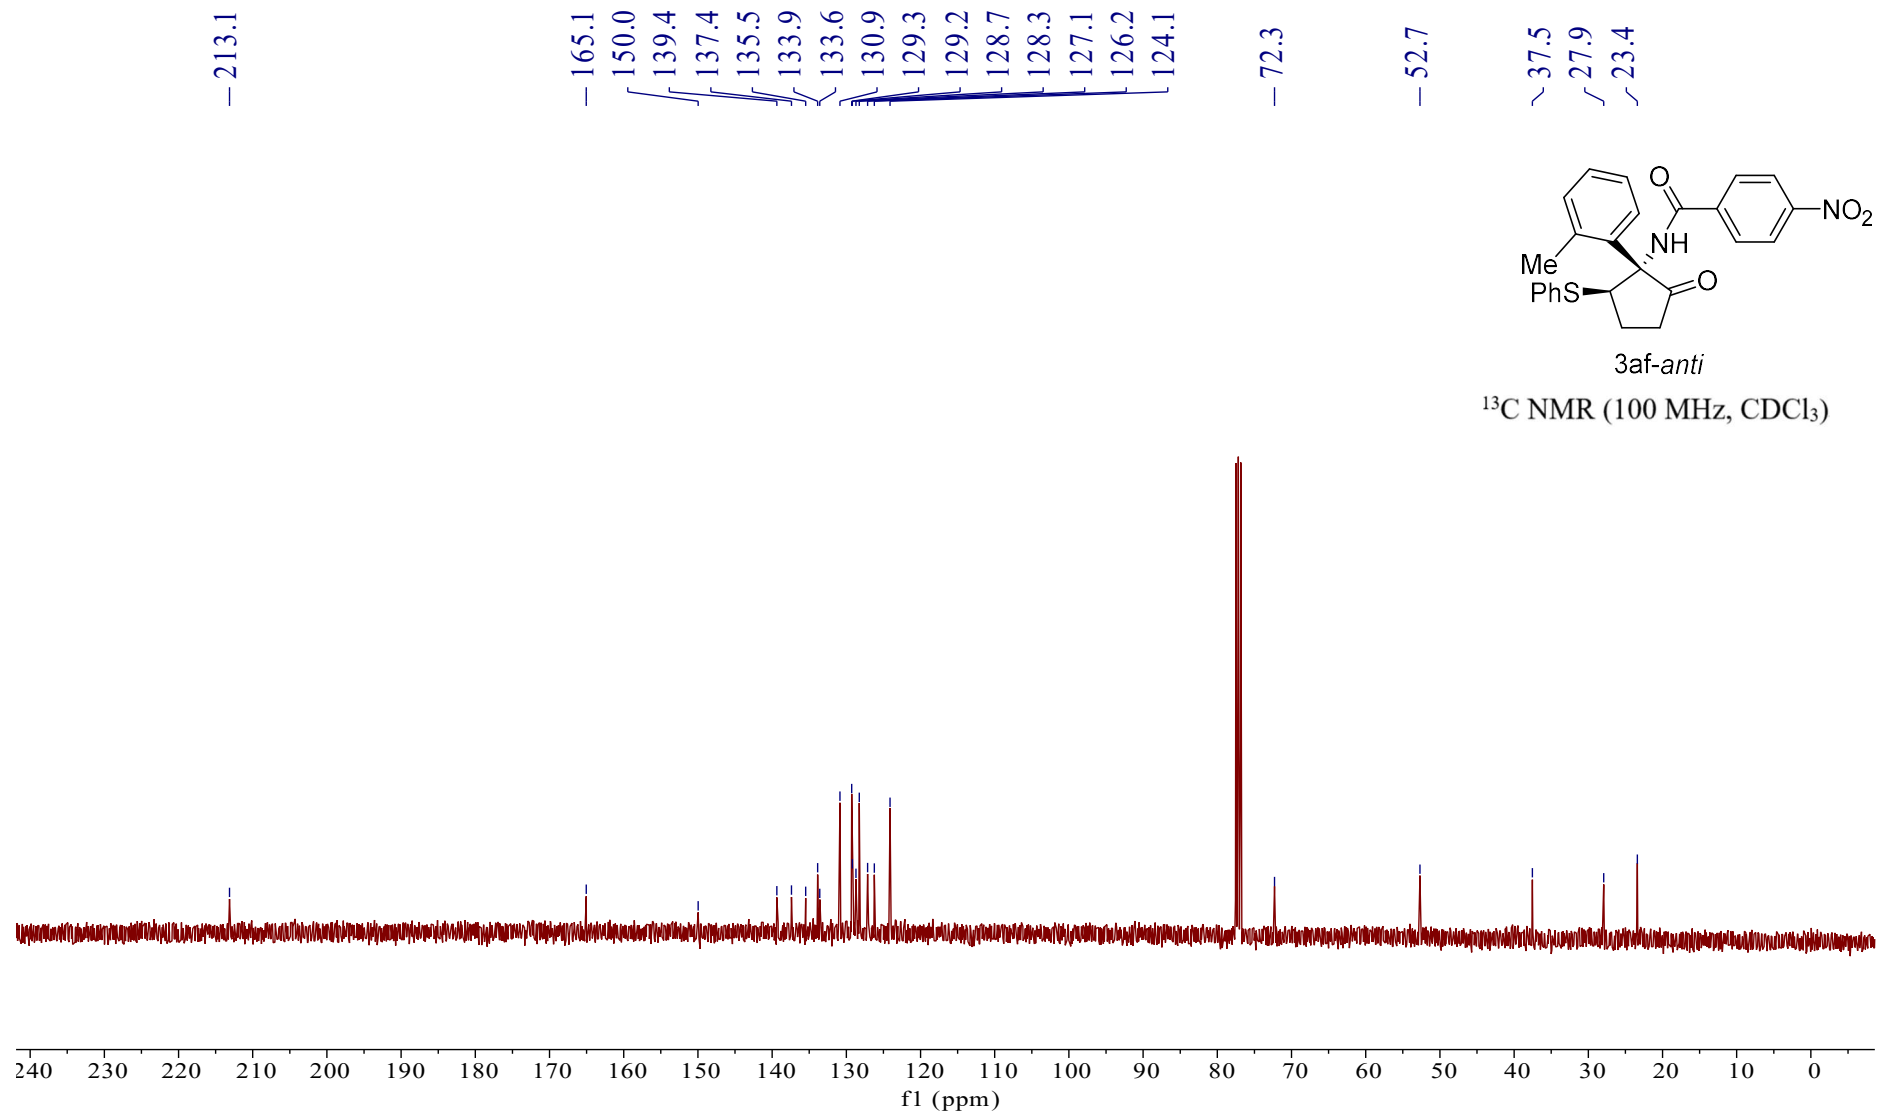

NMR-213

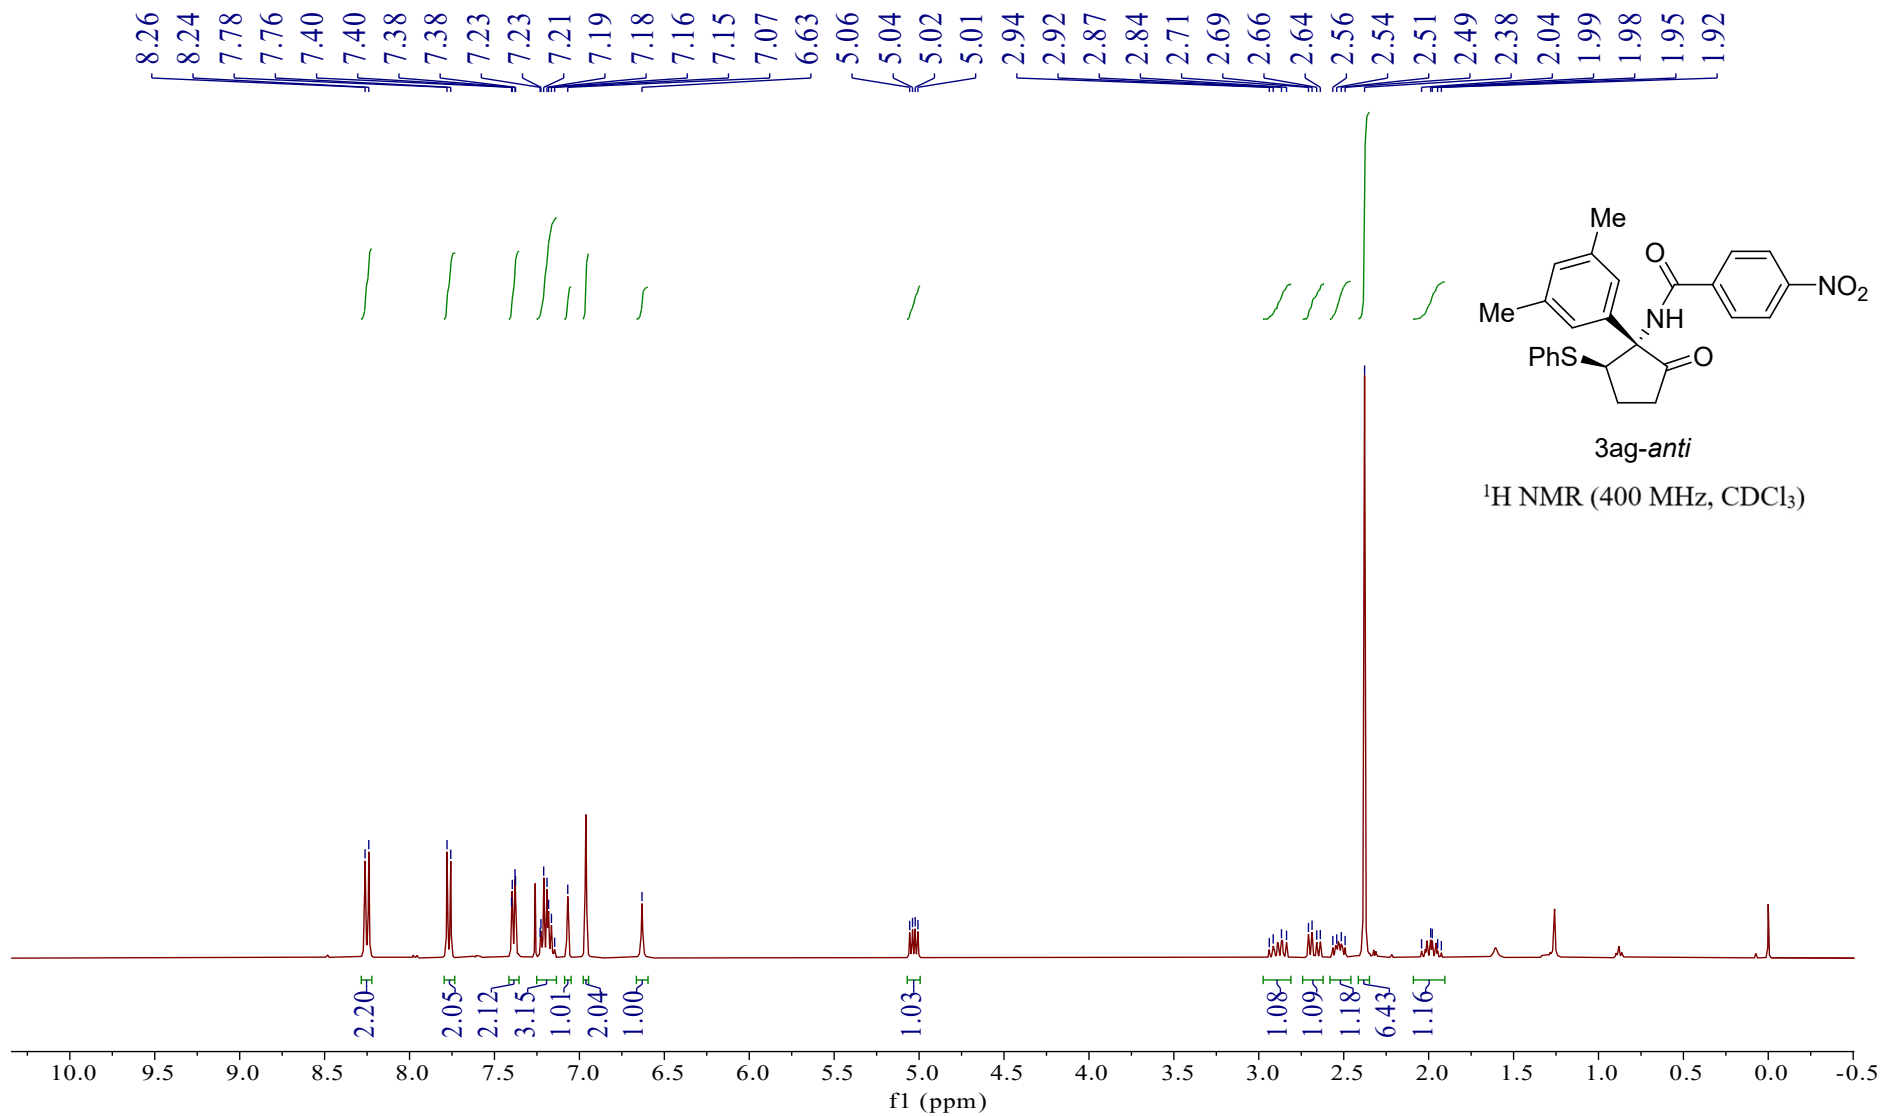

NMR-214

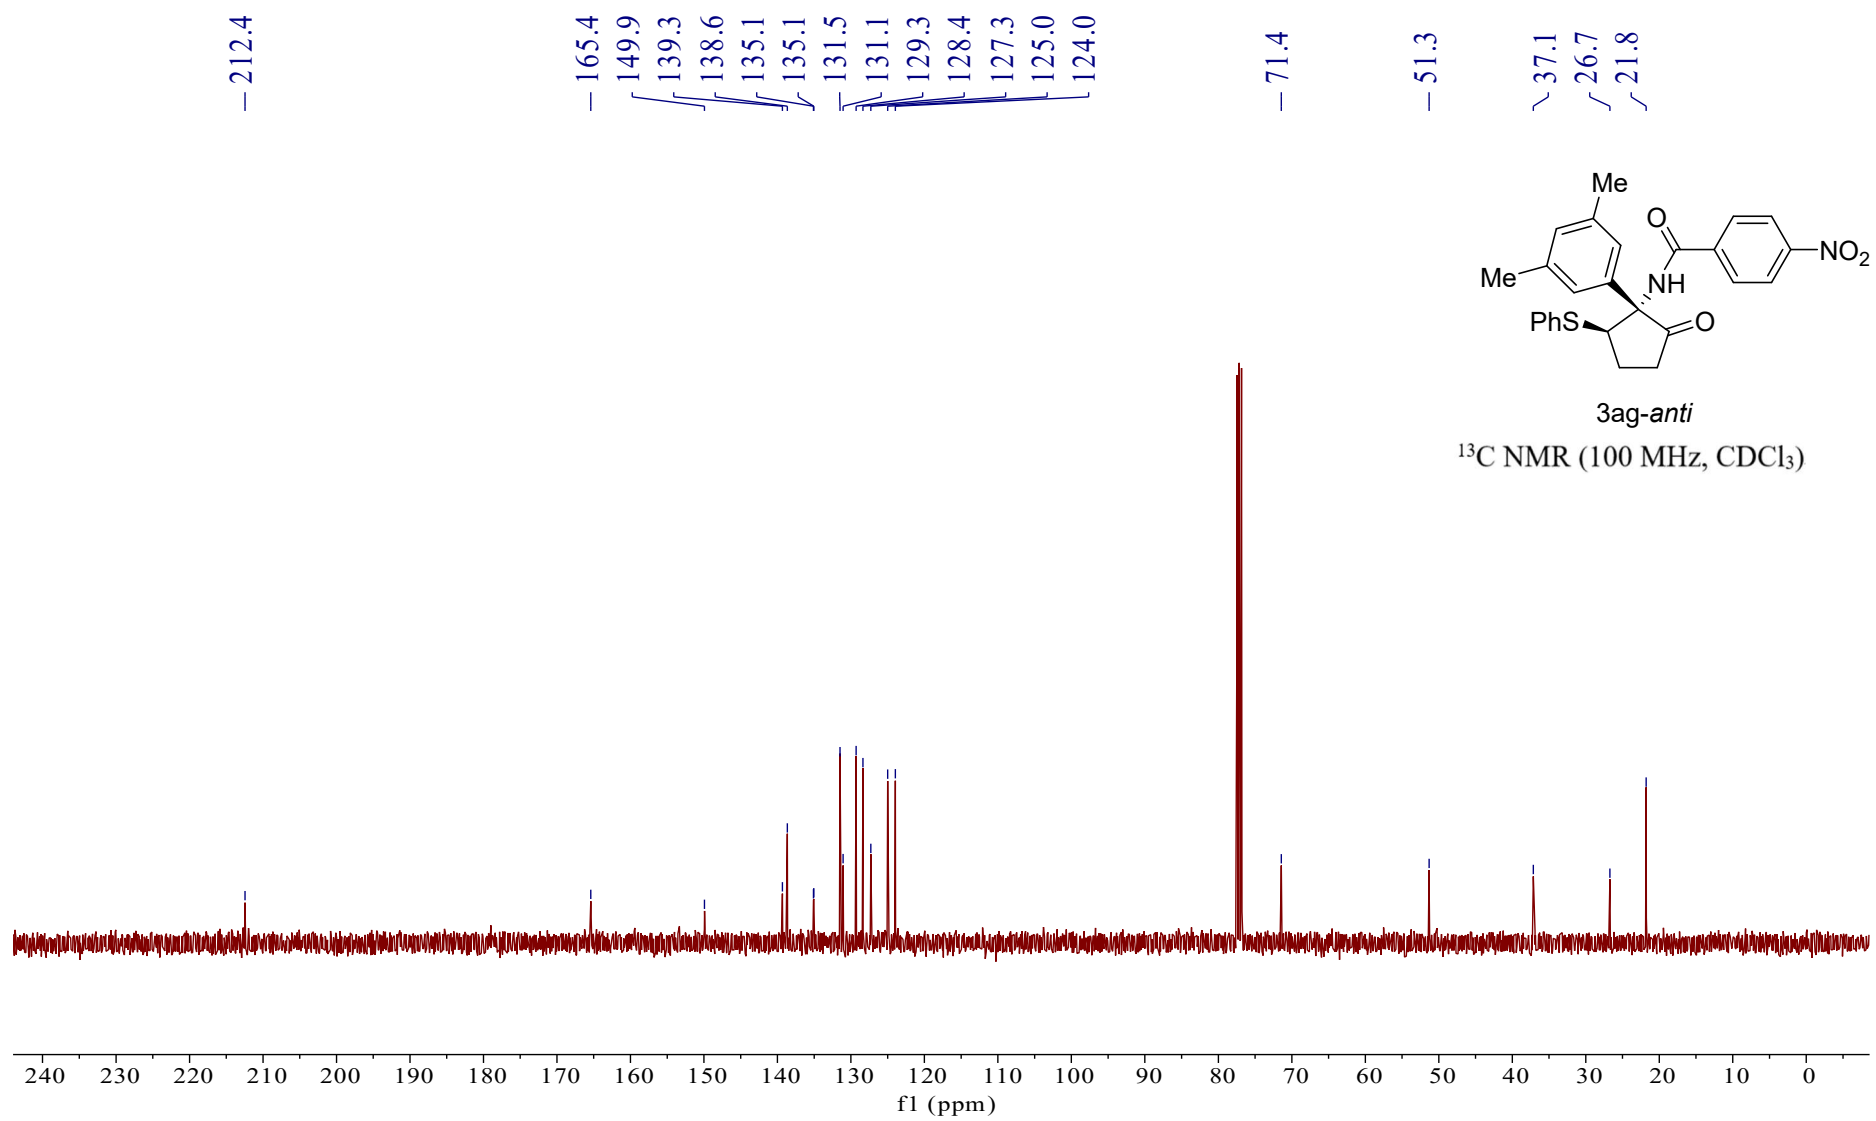

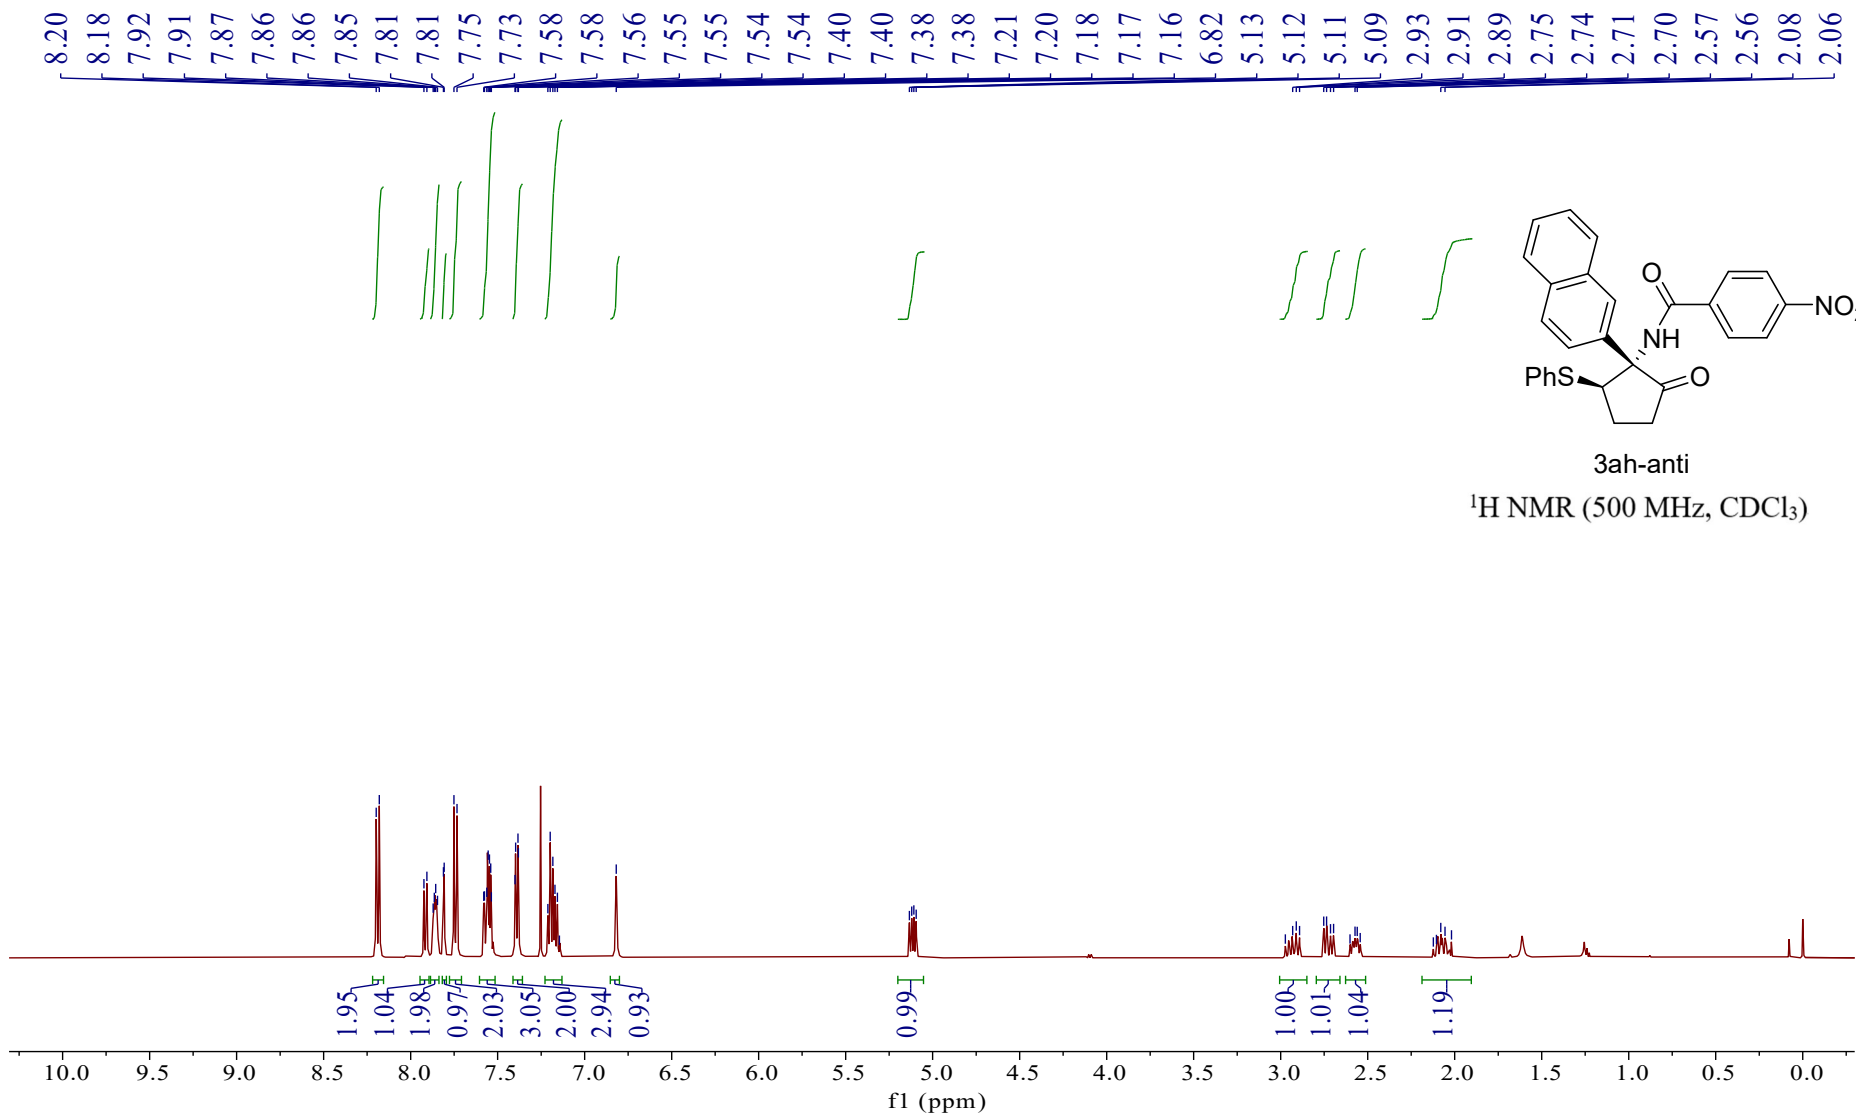

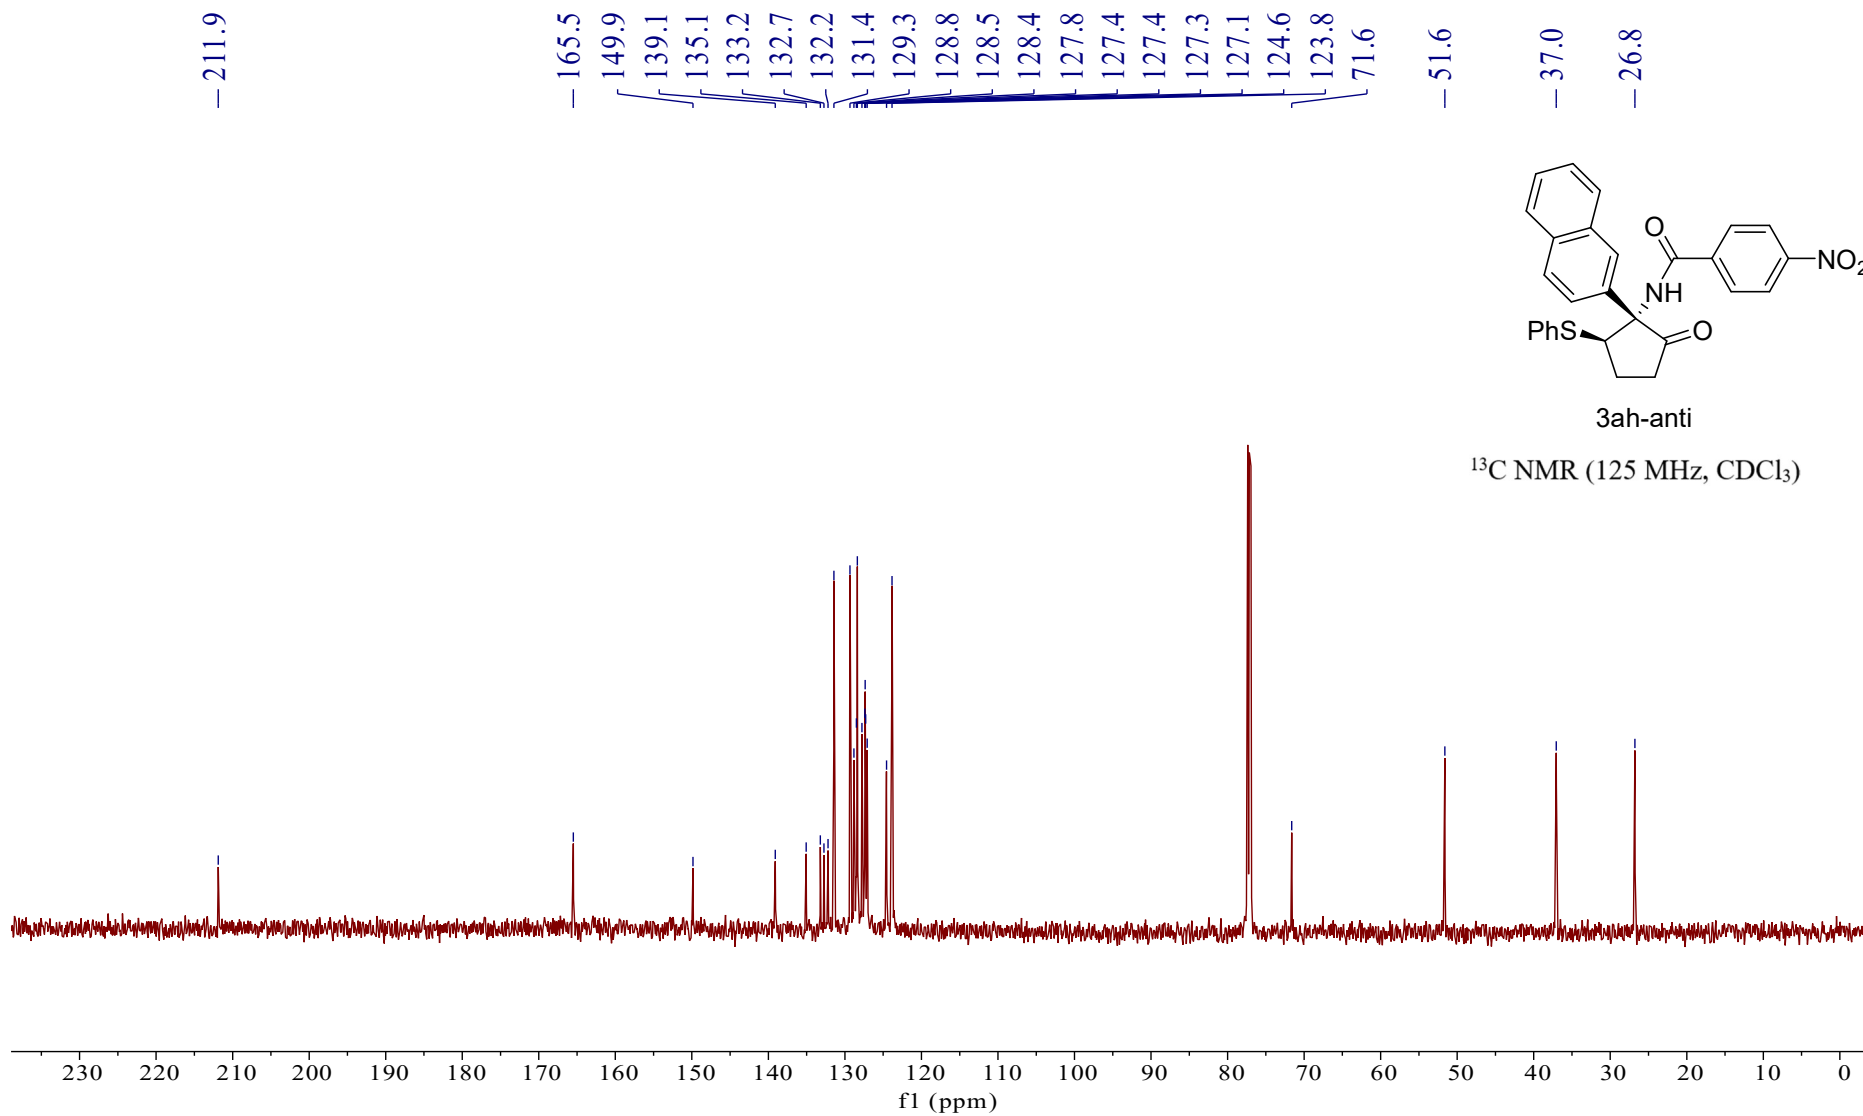

NMR-217

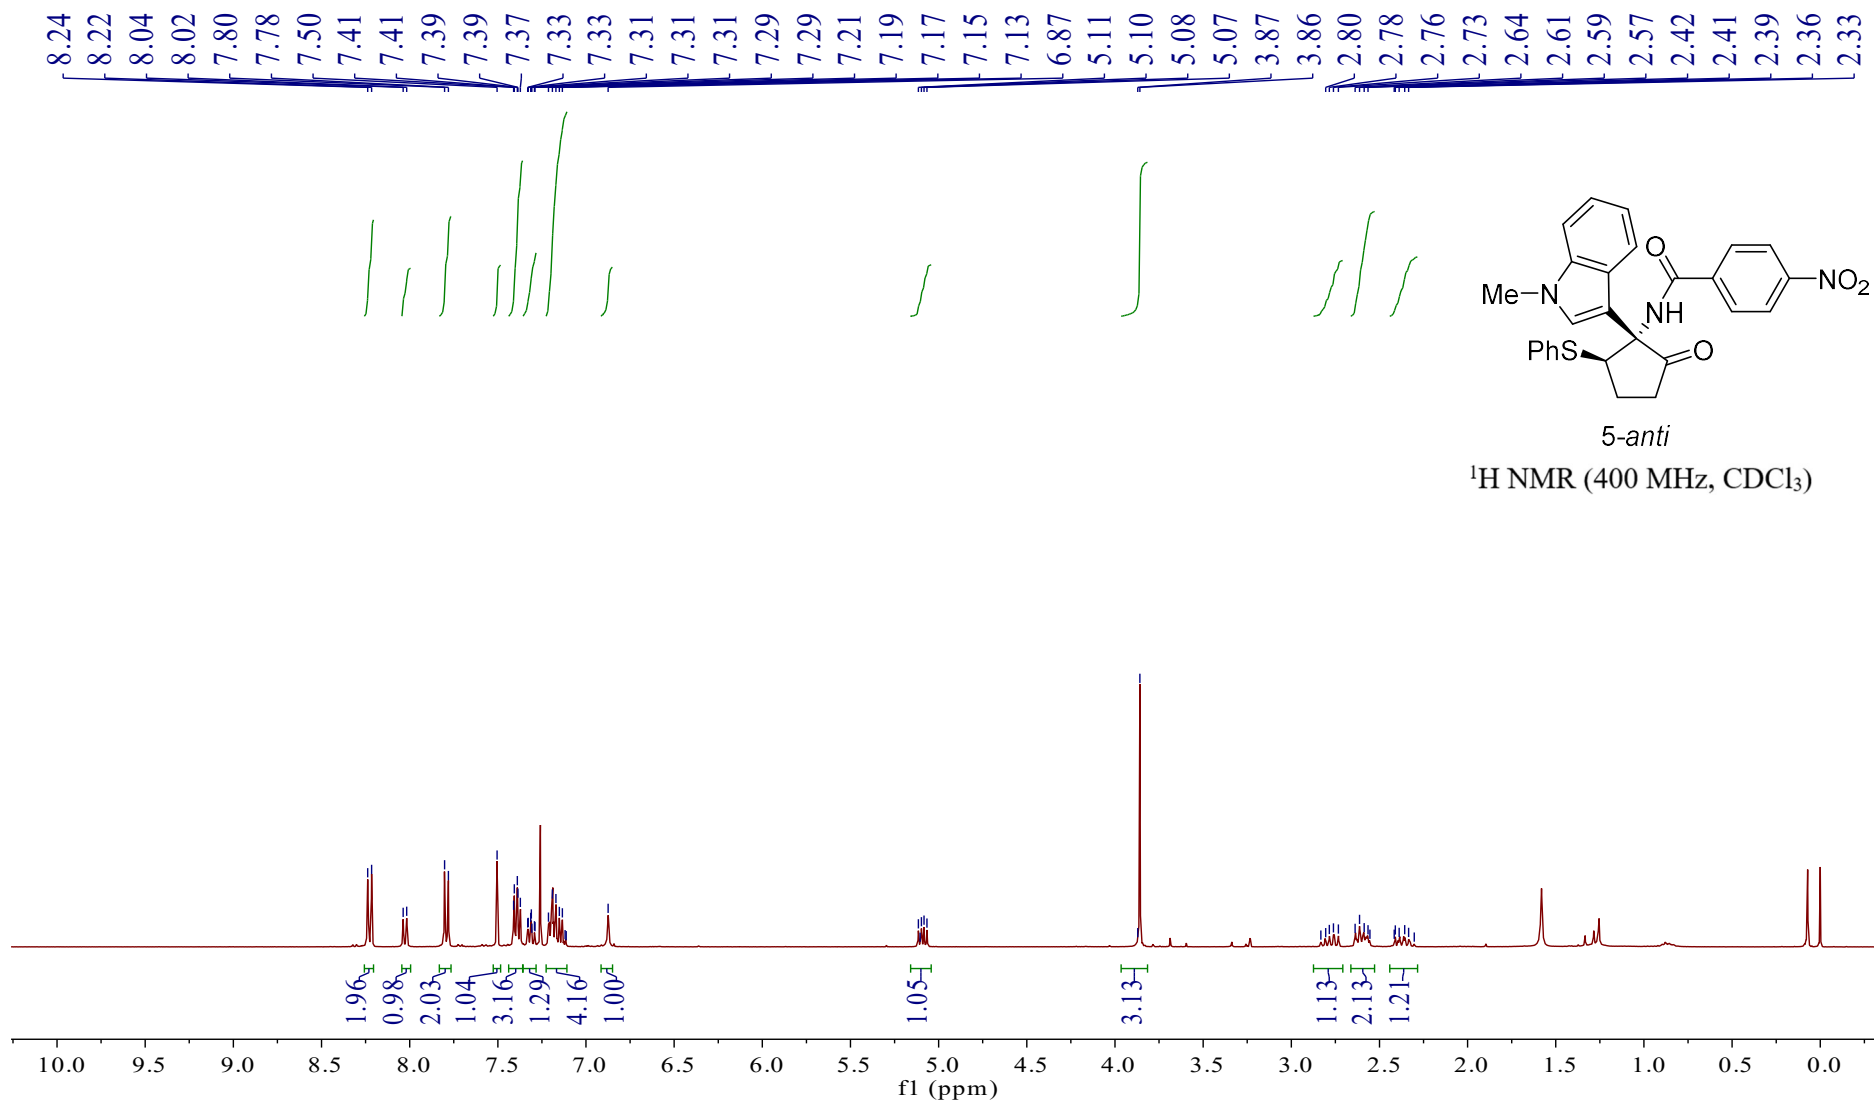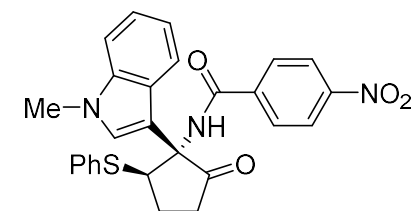

5-anti

<sup>1</sup>H NMR (400 MHz, CDCl<sub>3</sub>)

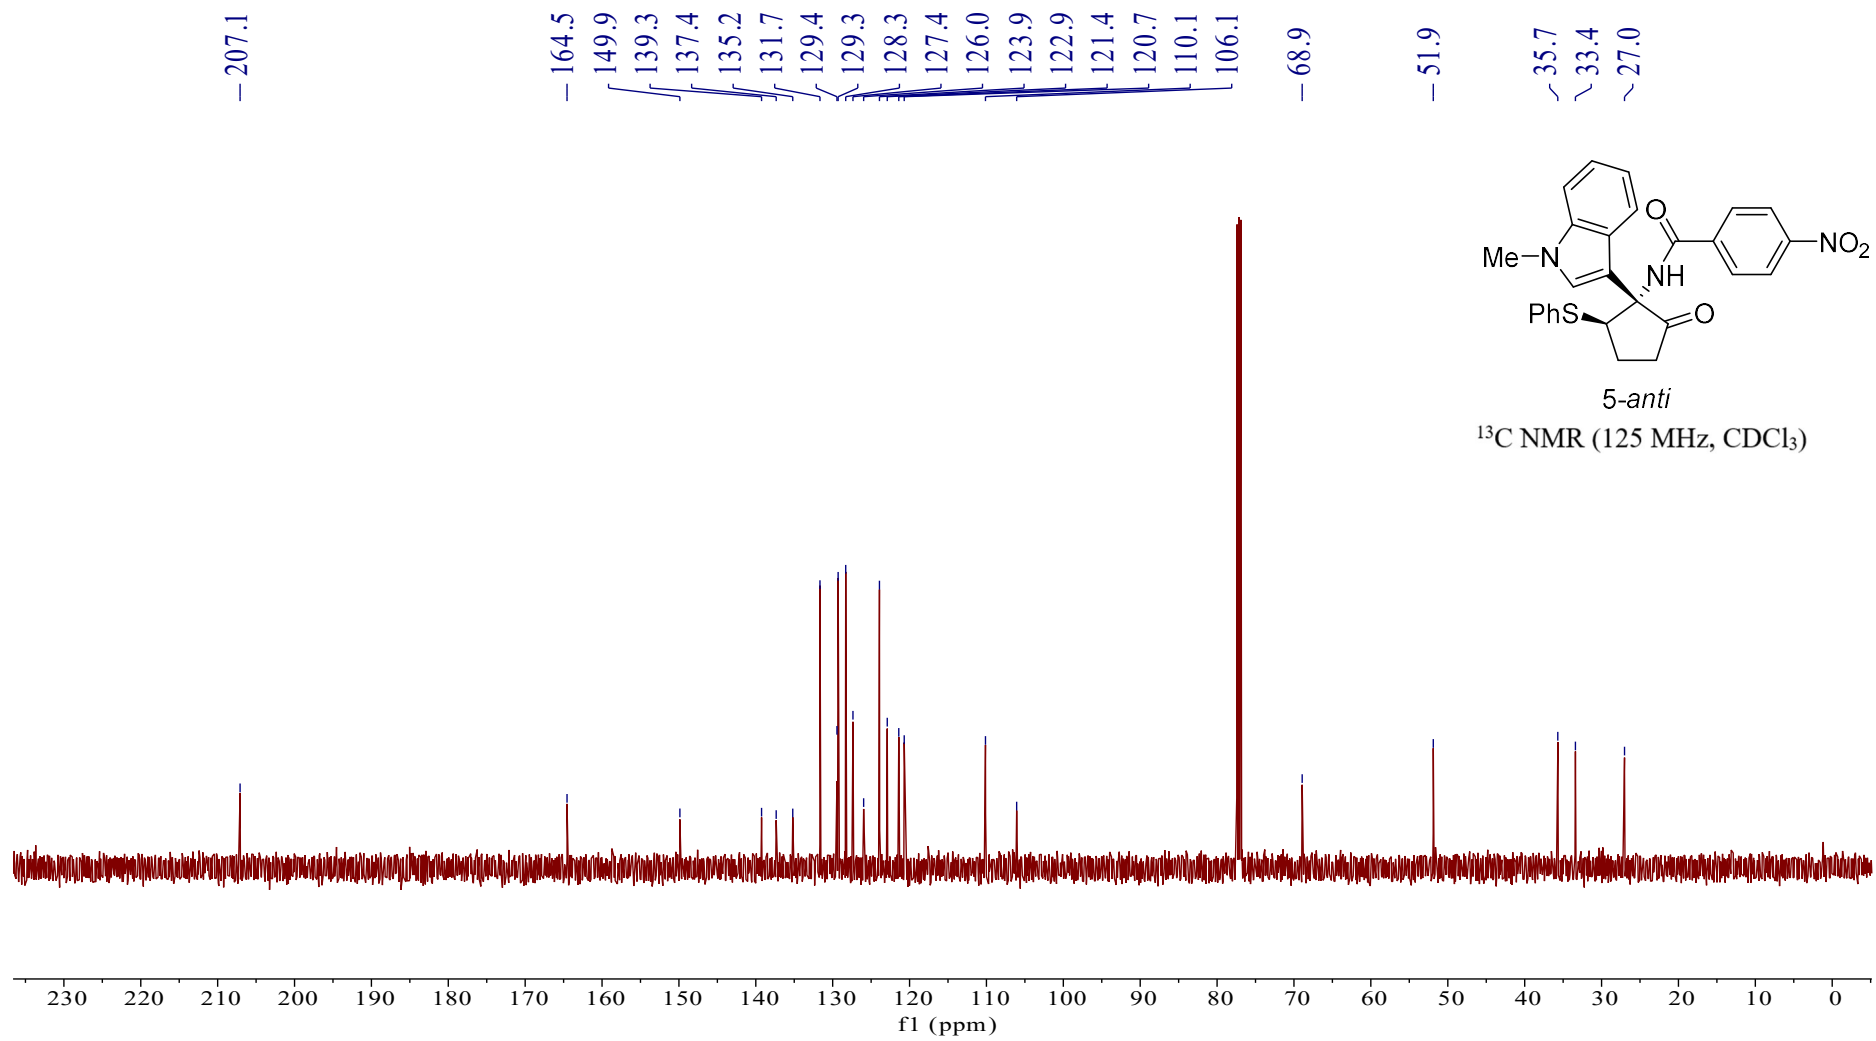

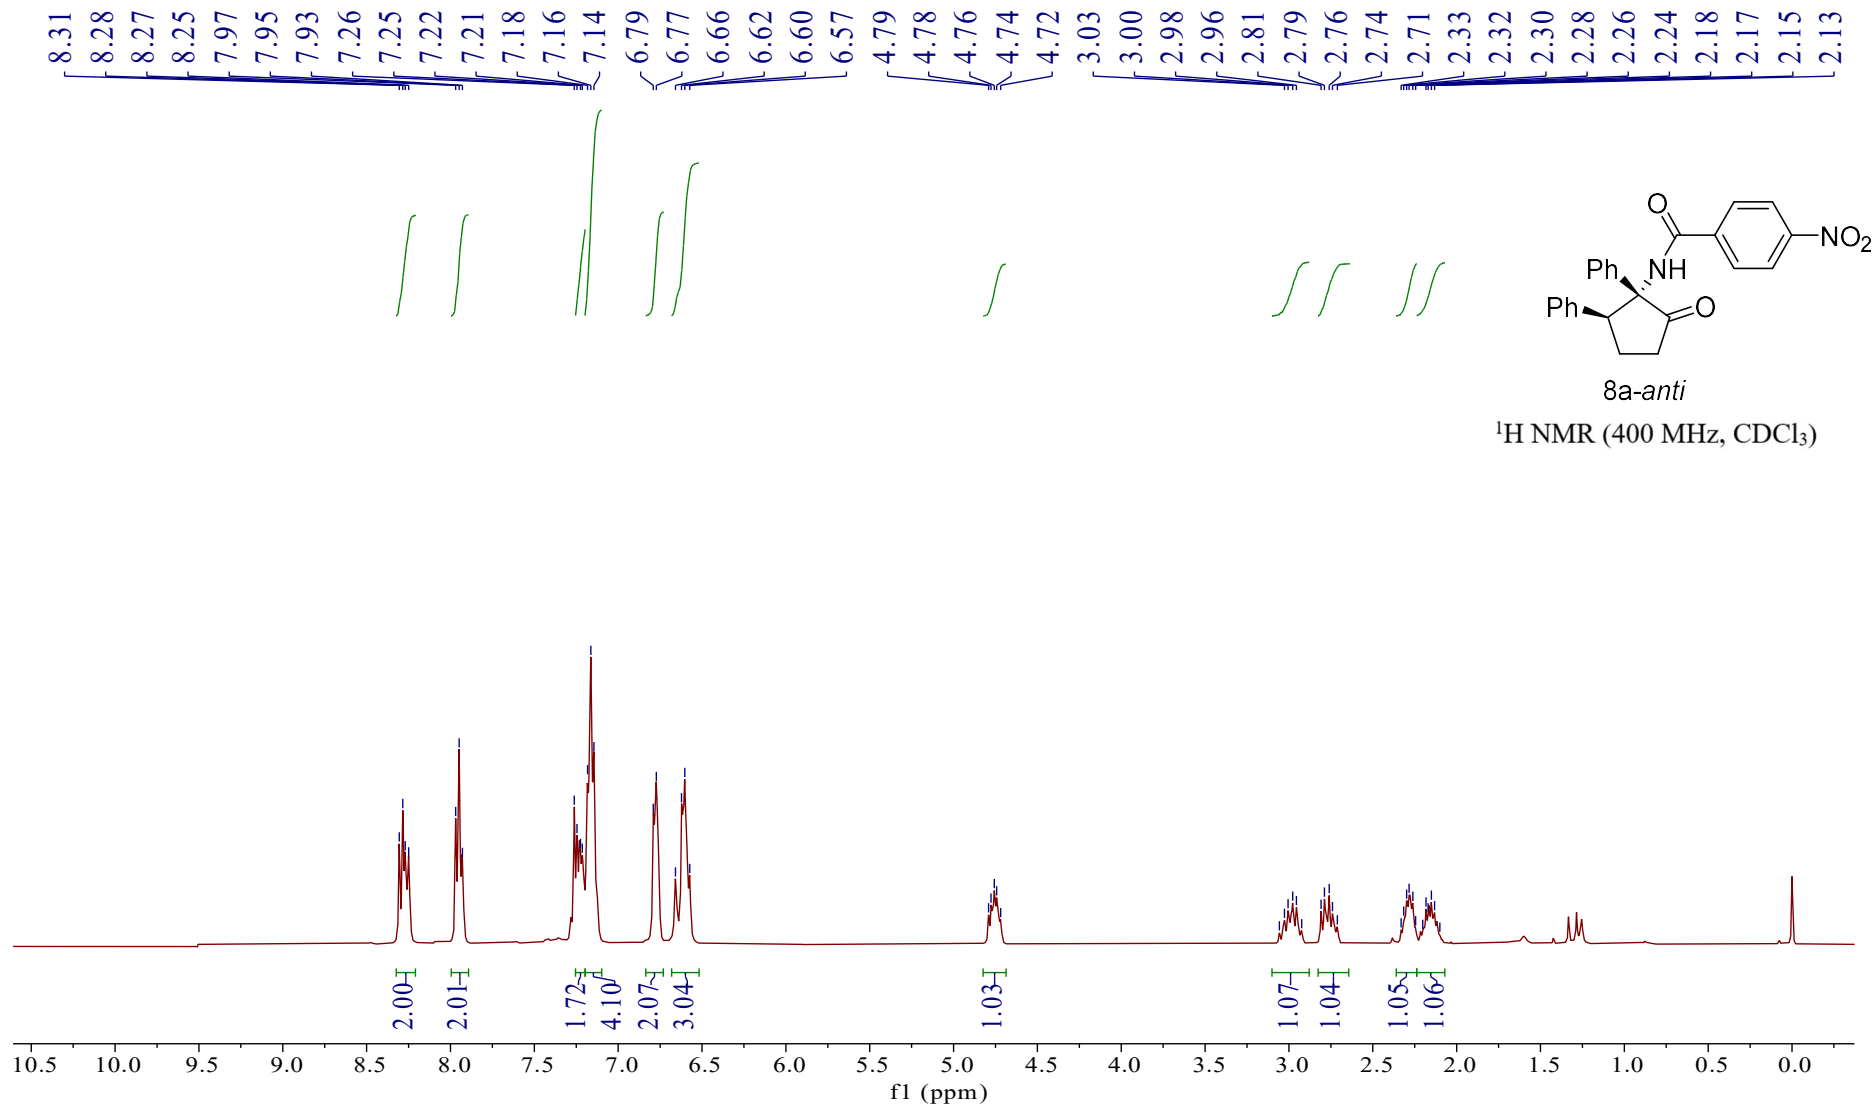



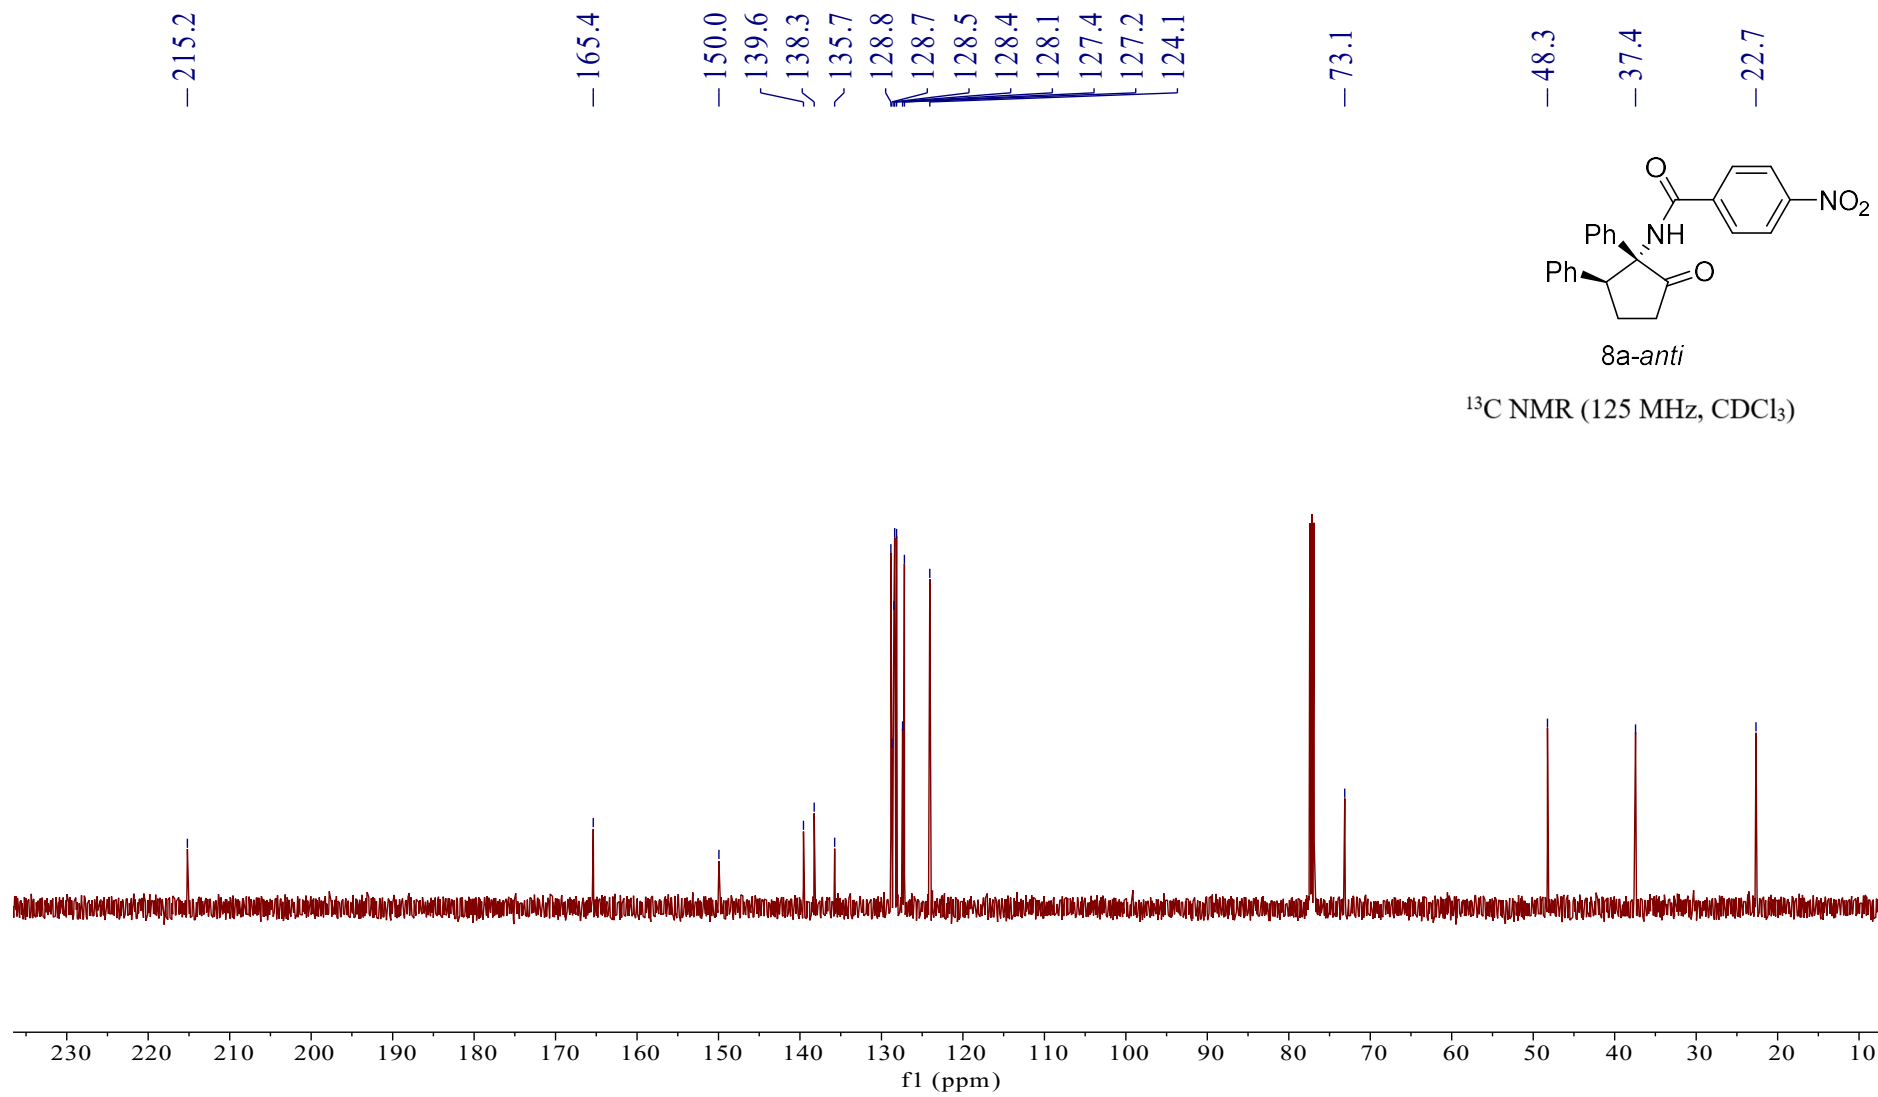

NMR-221

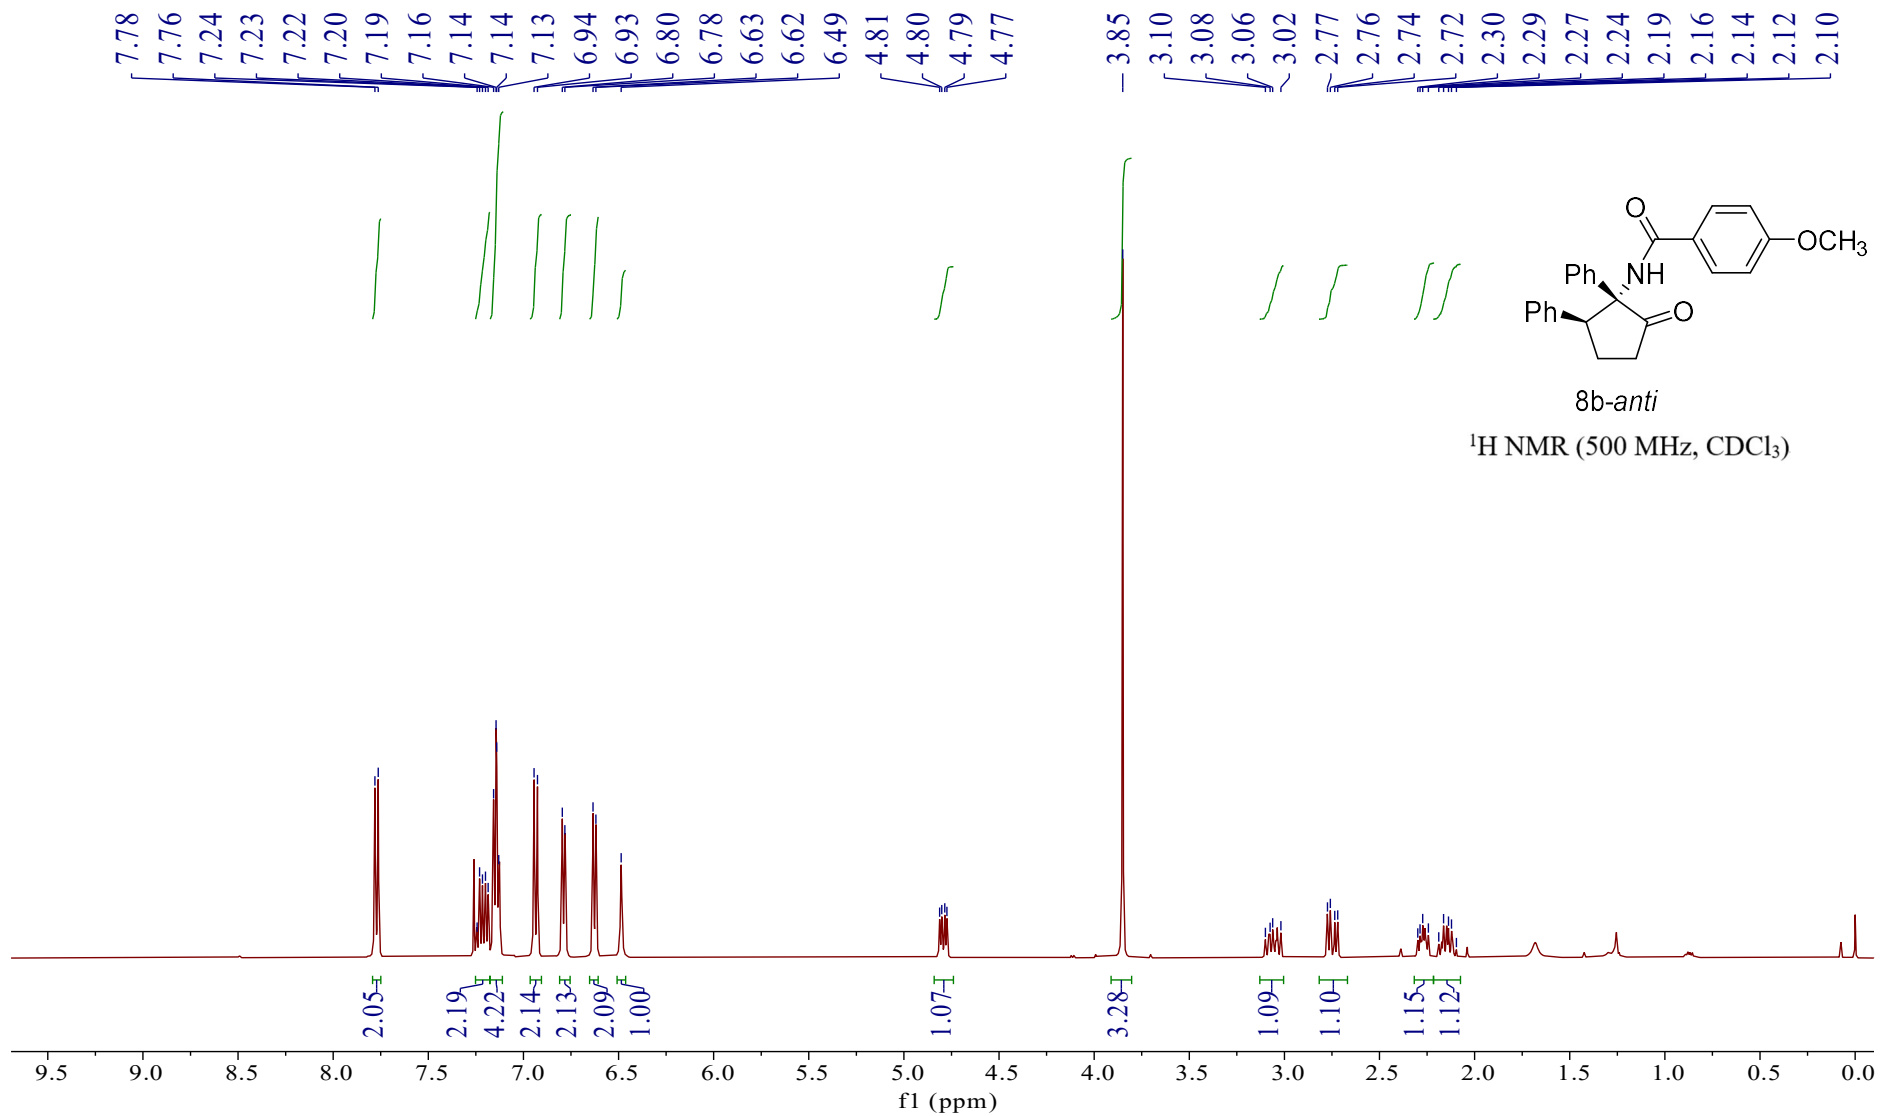

NMR-222

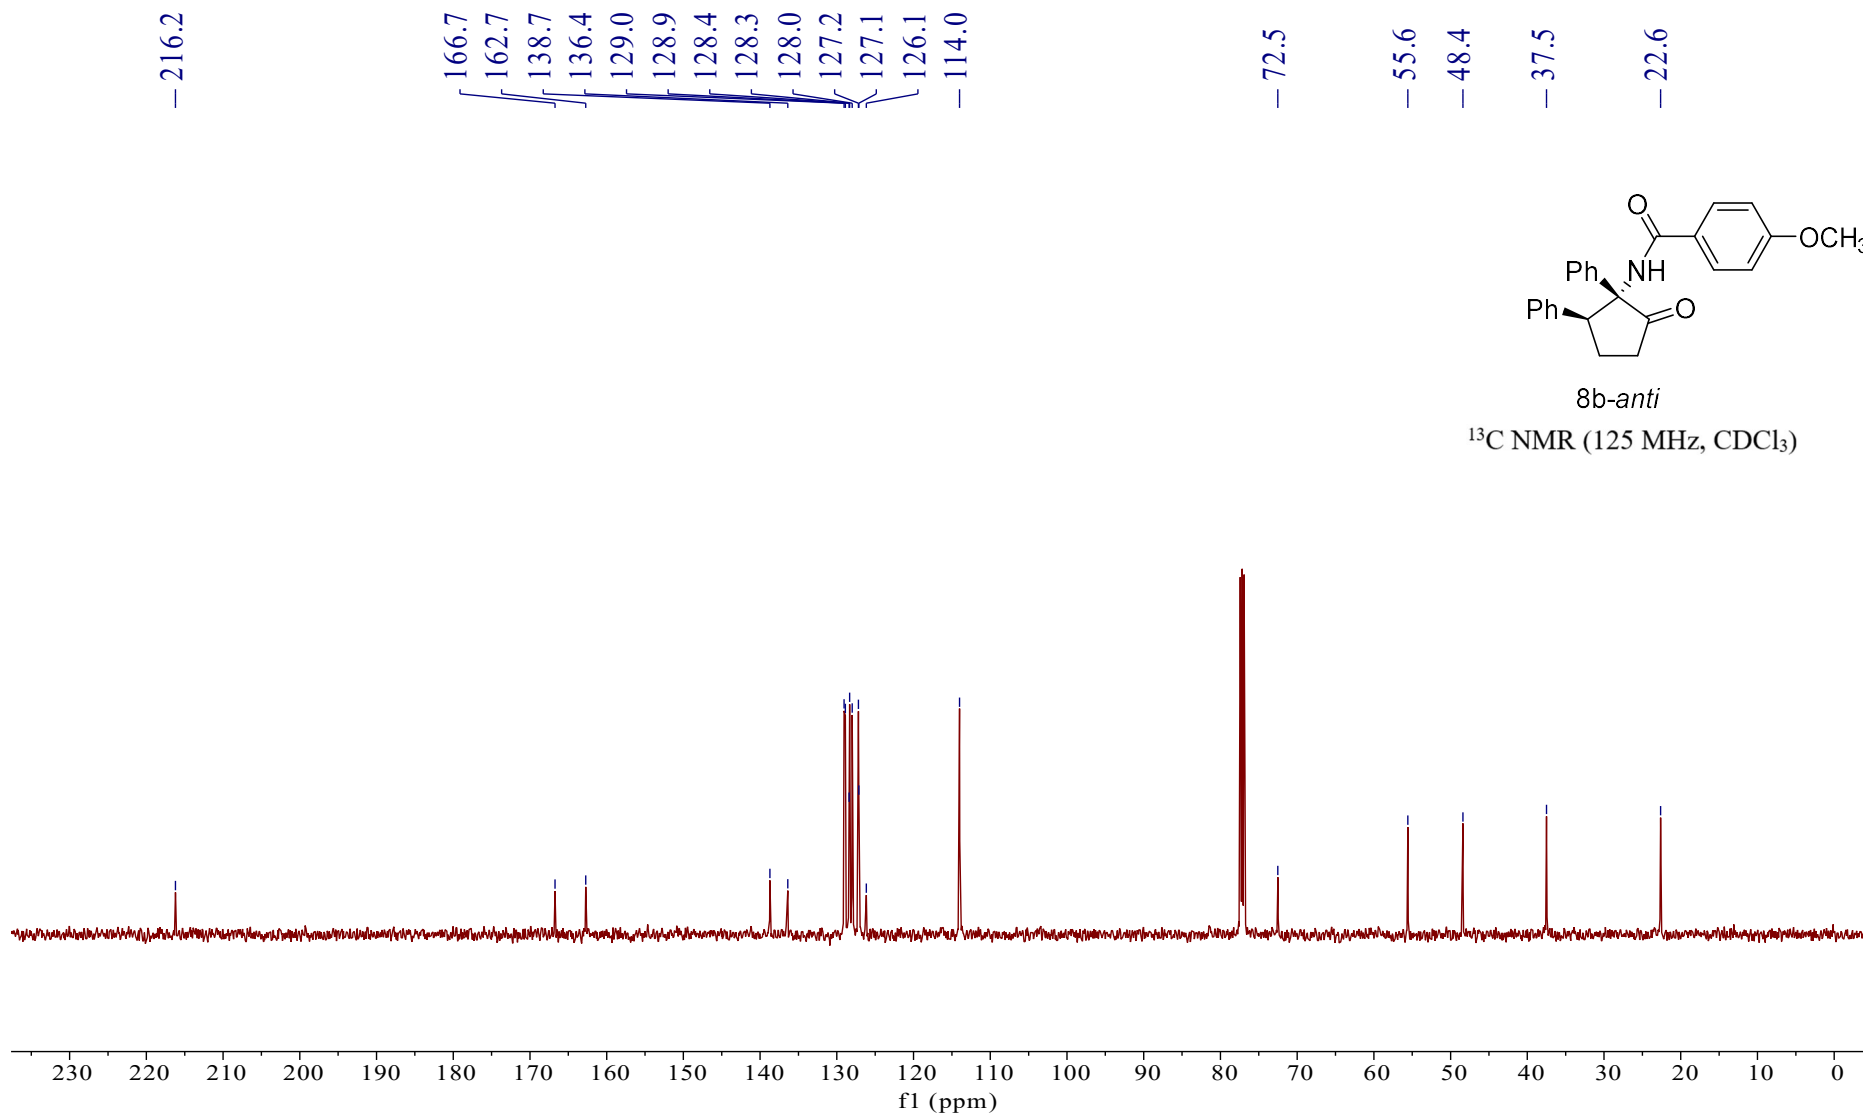

NMR-223

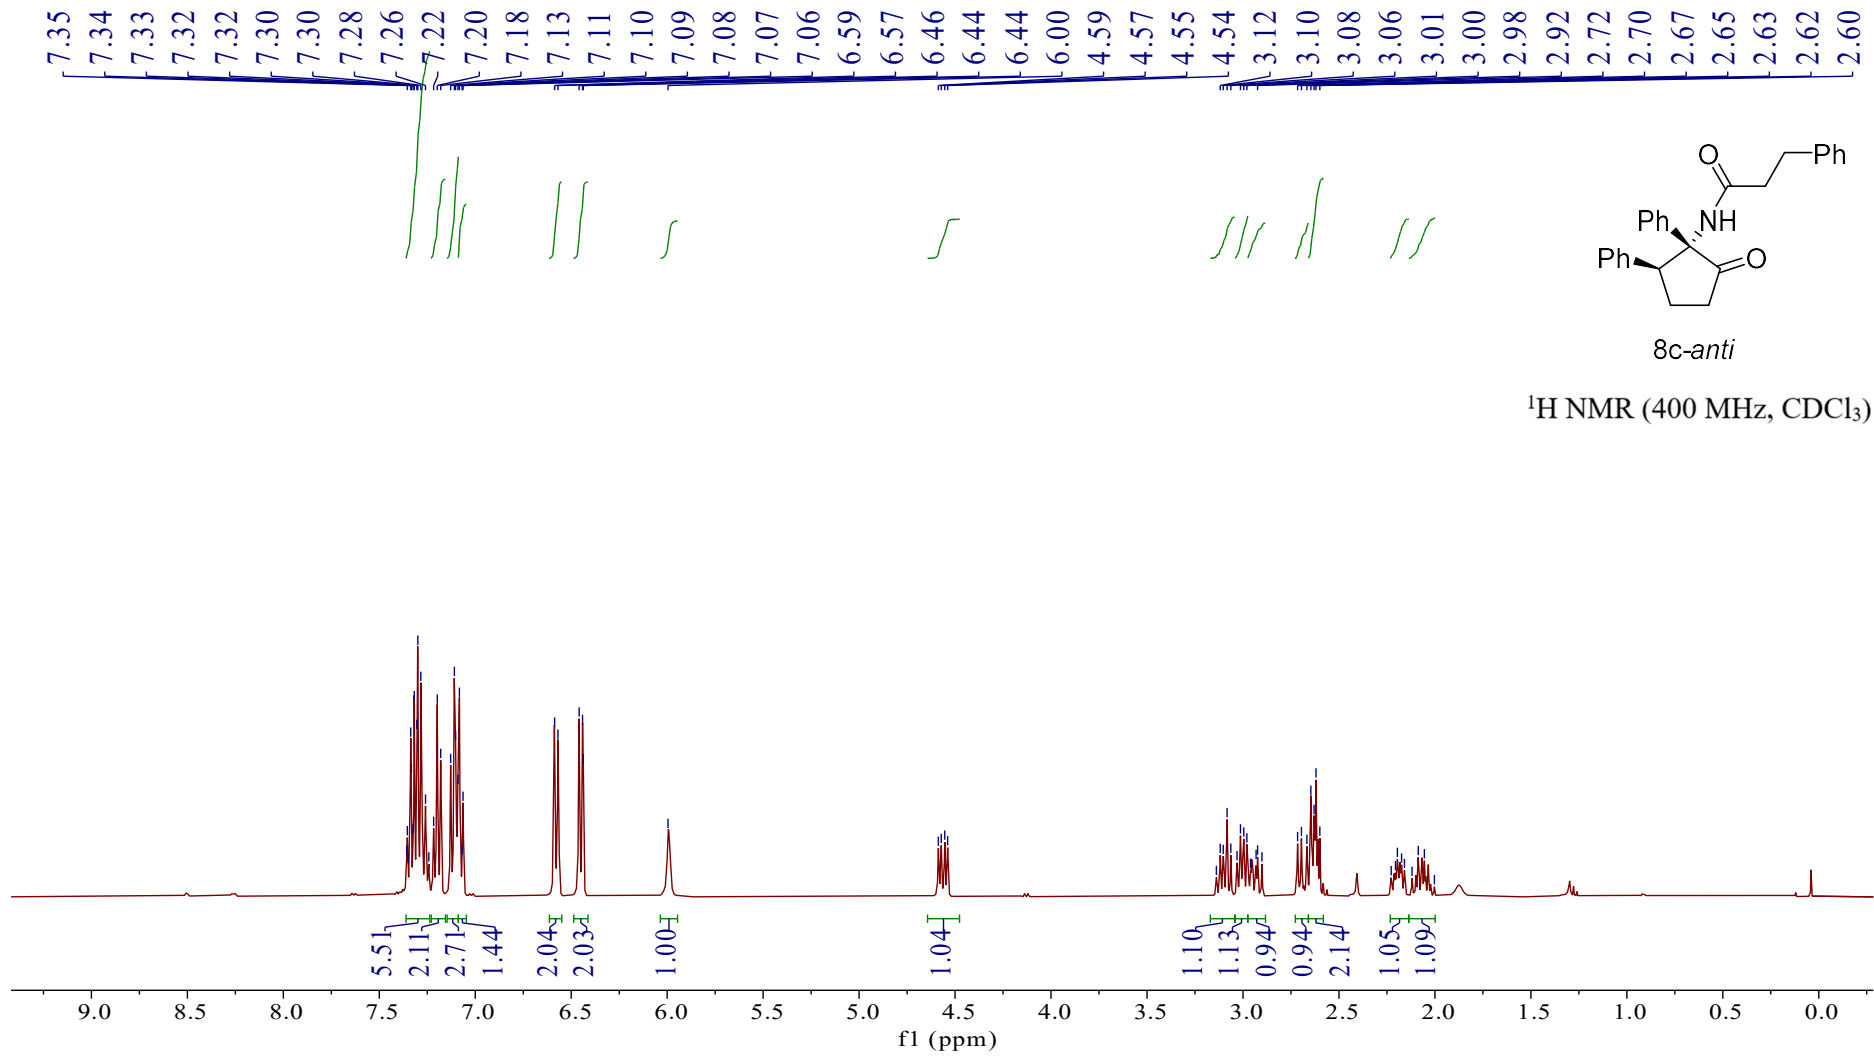

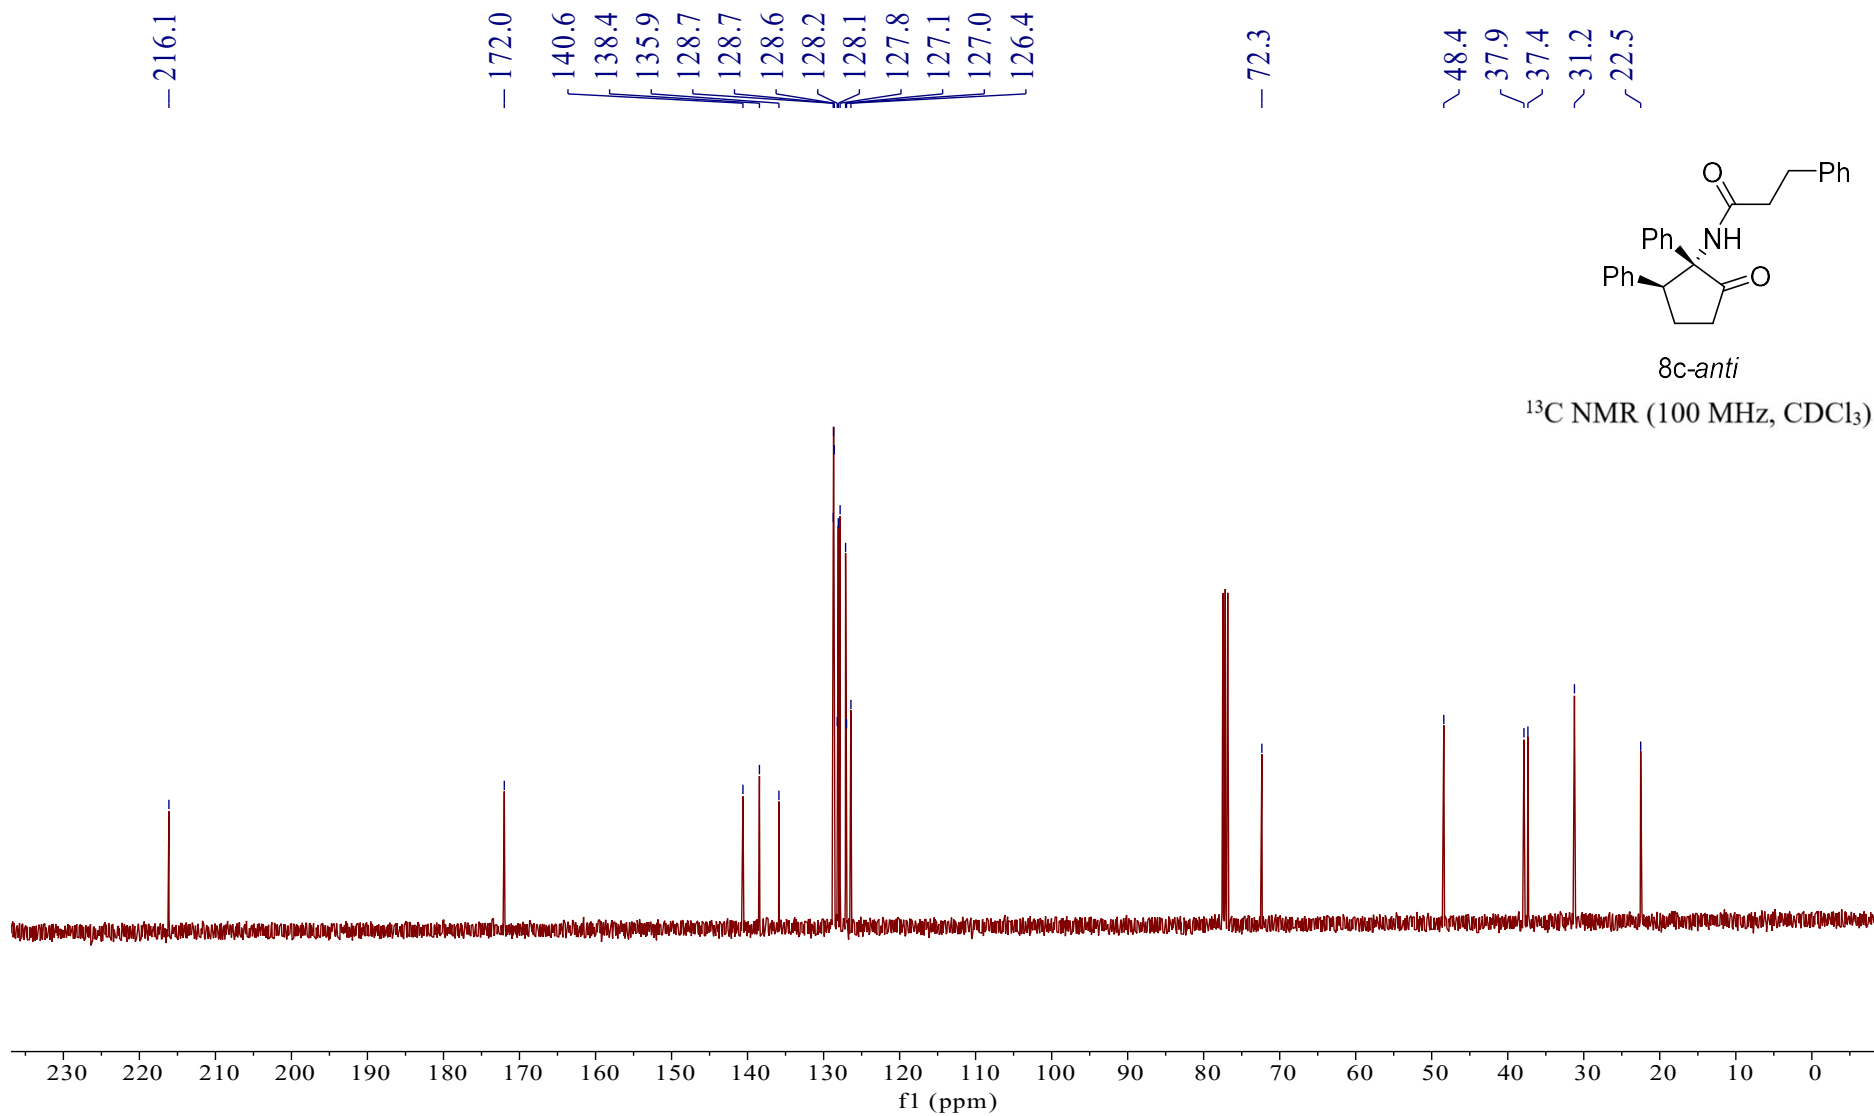

NMR-225

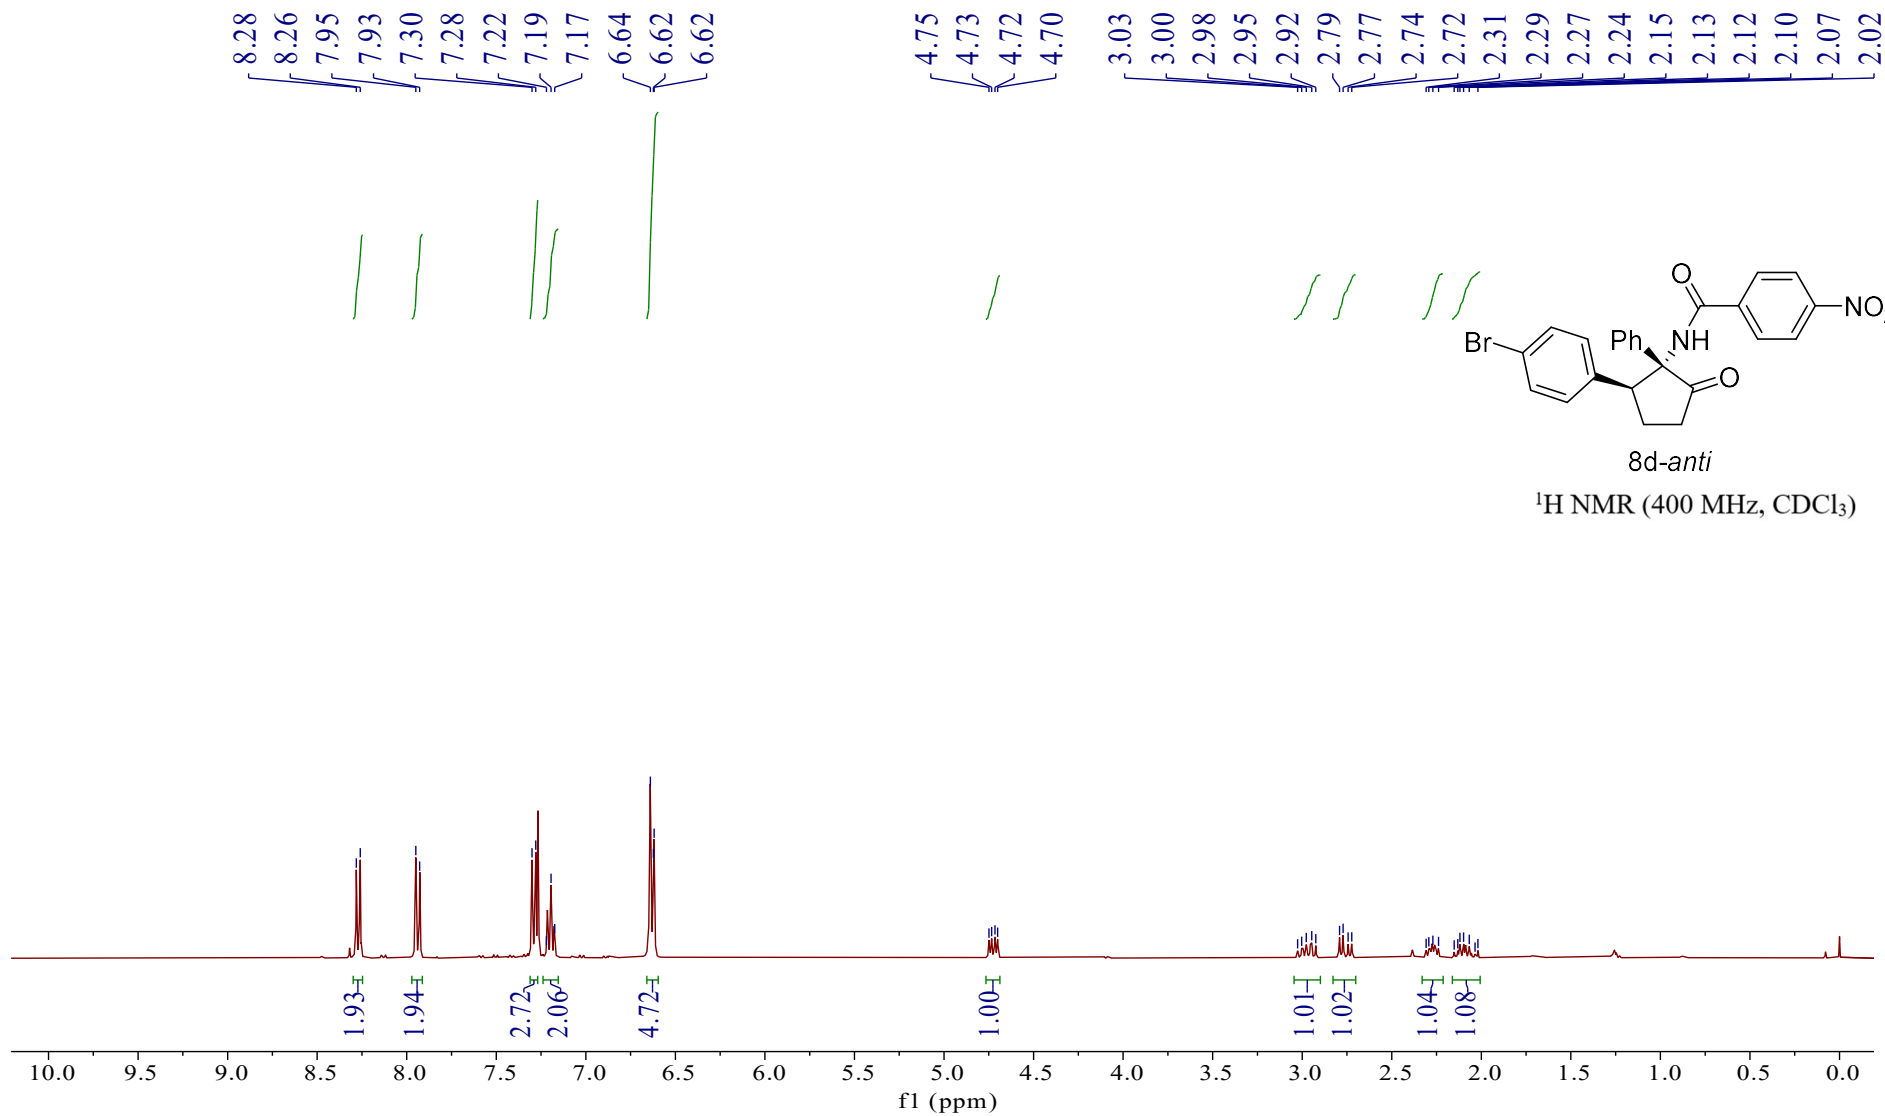

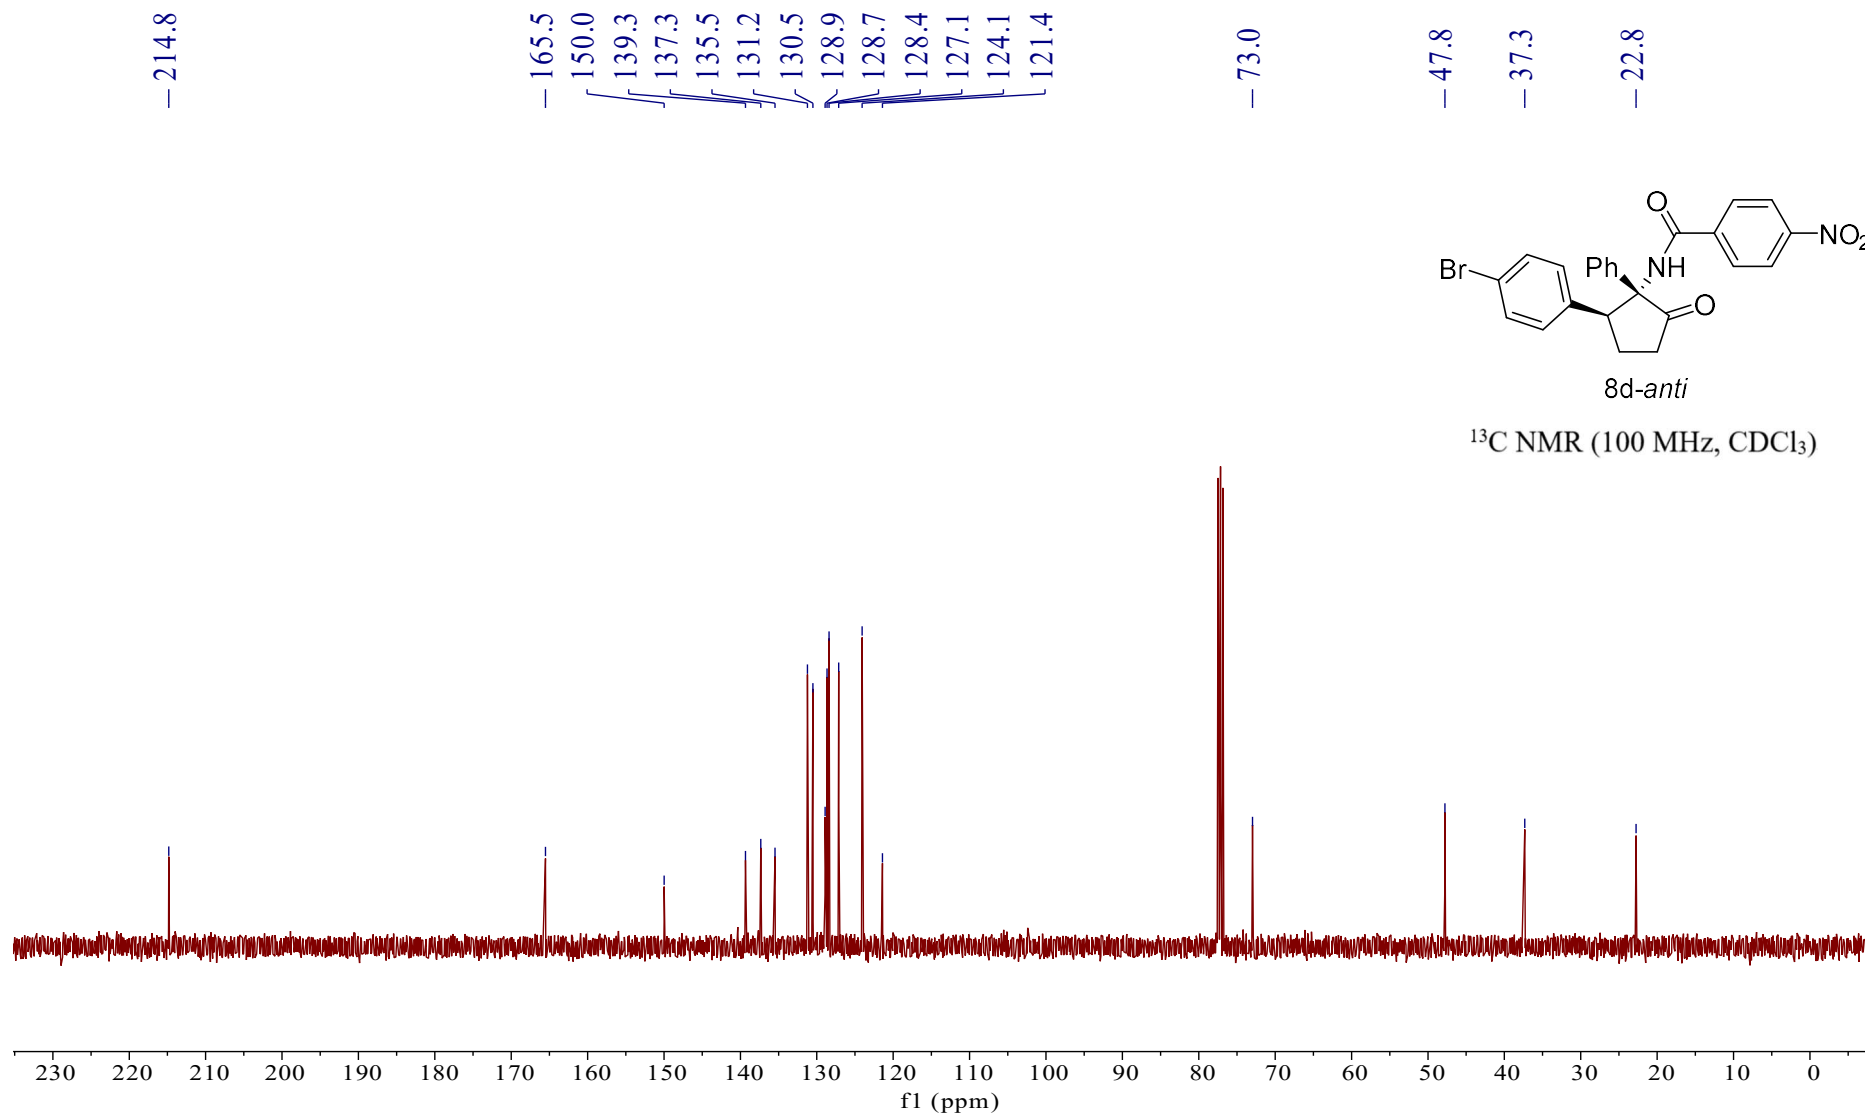

NMR-227

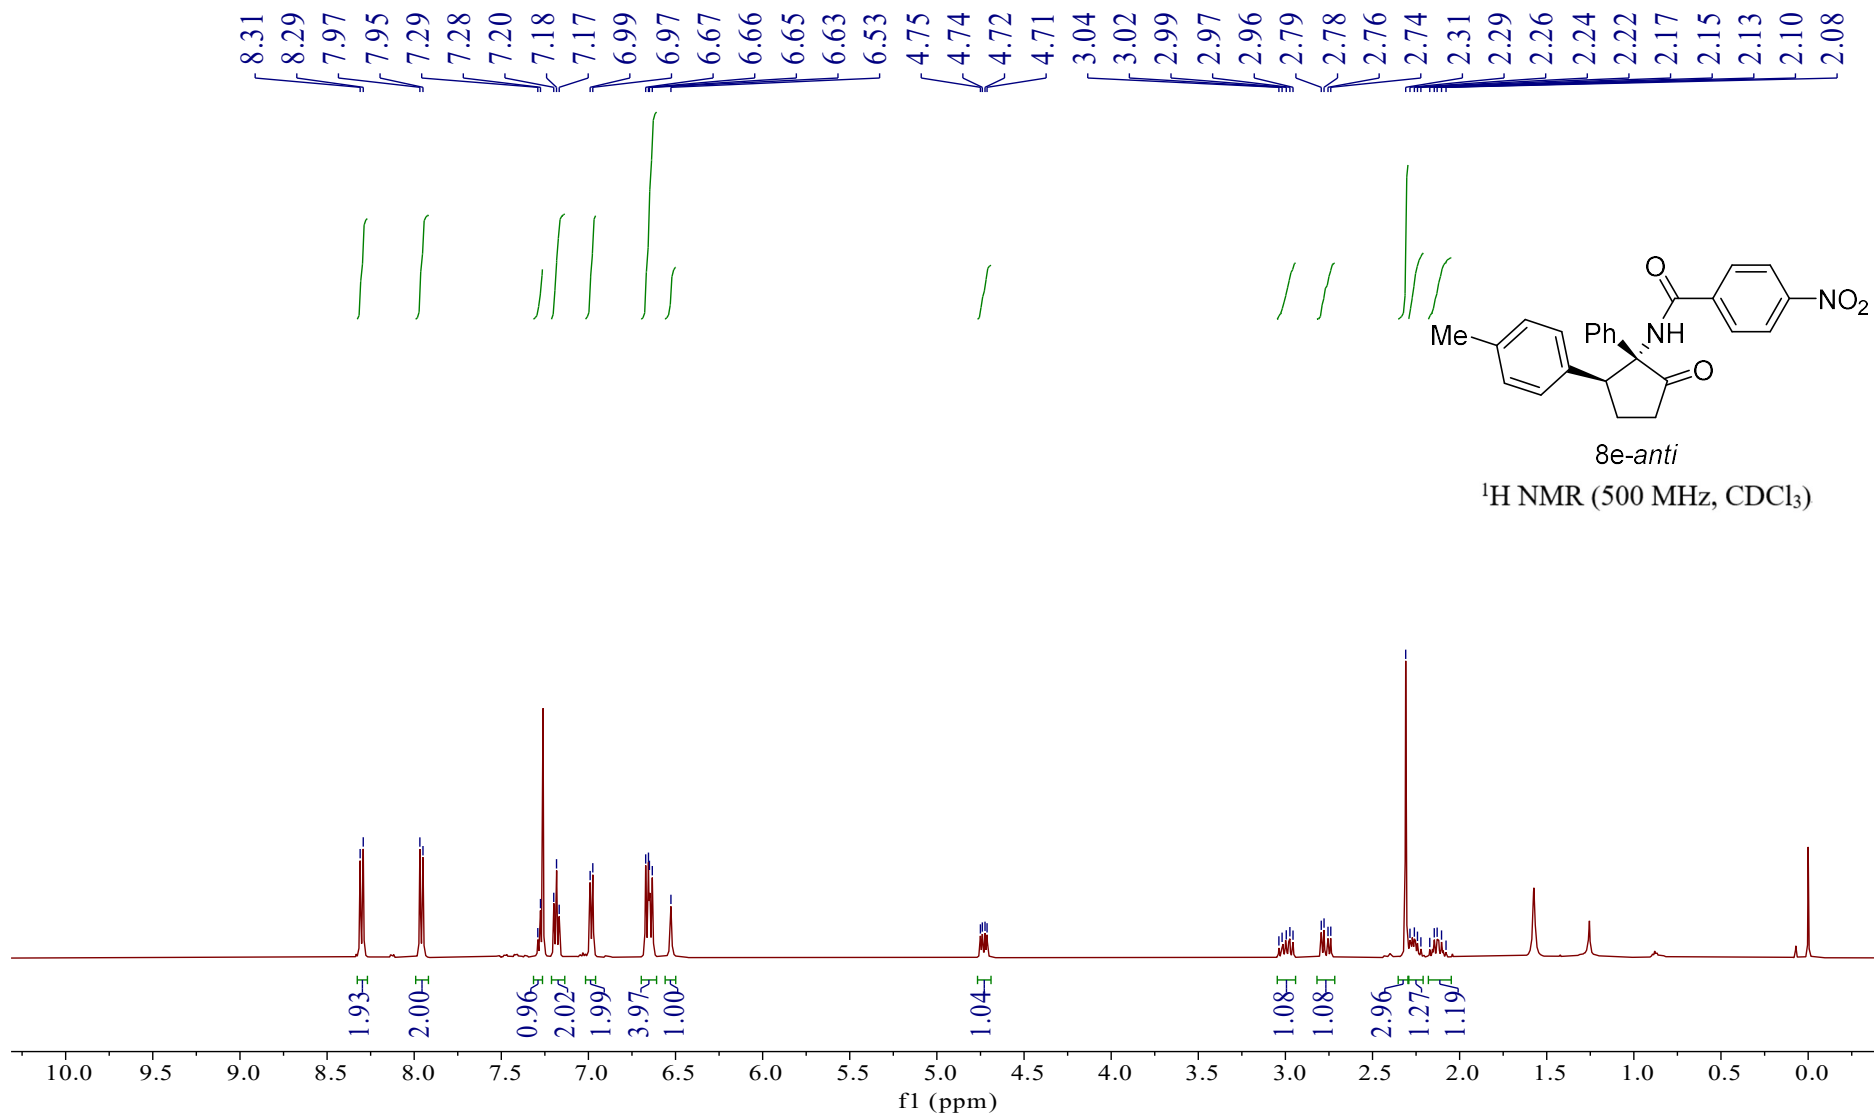

NMR-228



-215.3

-165.3

-149.9

-139.6

-137.0

-135.7

-135.1

-128.8

-128.7

-128.6

-128.4

-127.3

-124.0

-73.1

-47.9

-37.4

-22.8

-21.2

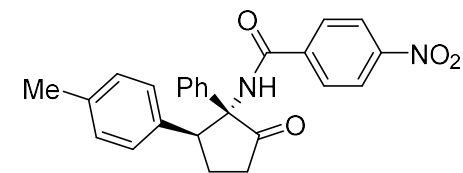

8e-anti

<sup>13</sup>C NMR (125 MHz, CDCl<sub>3</sub>)

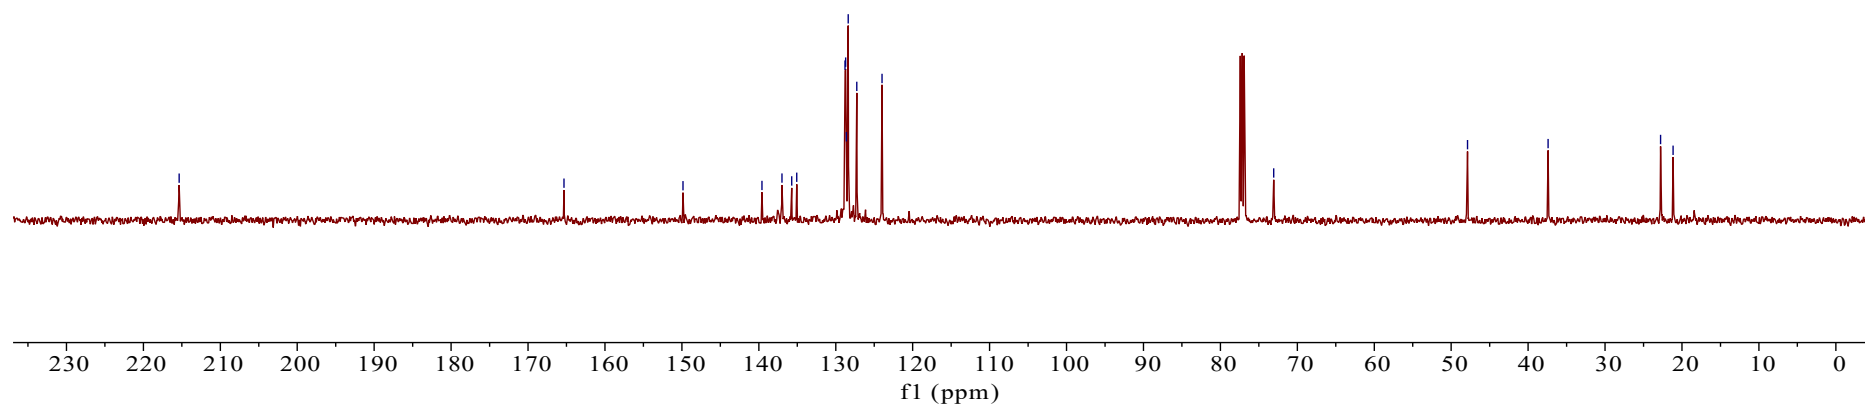

NMR-229

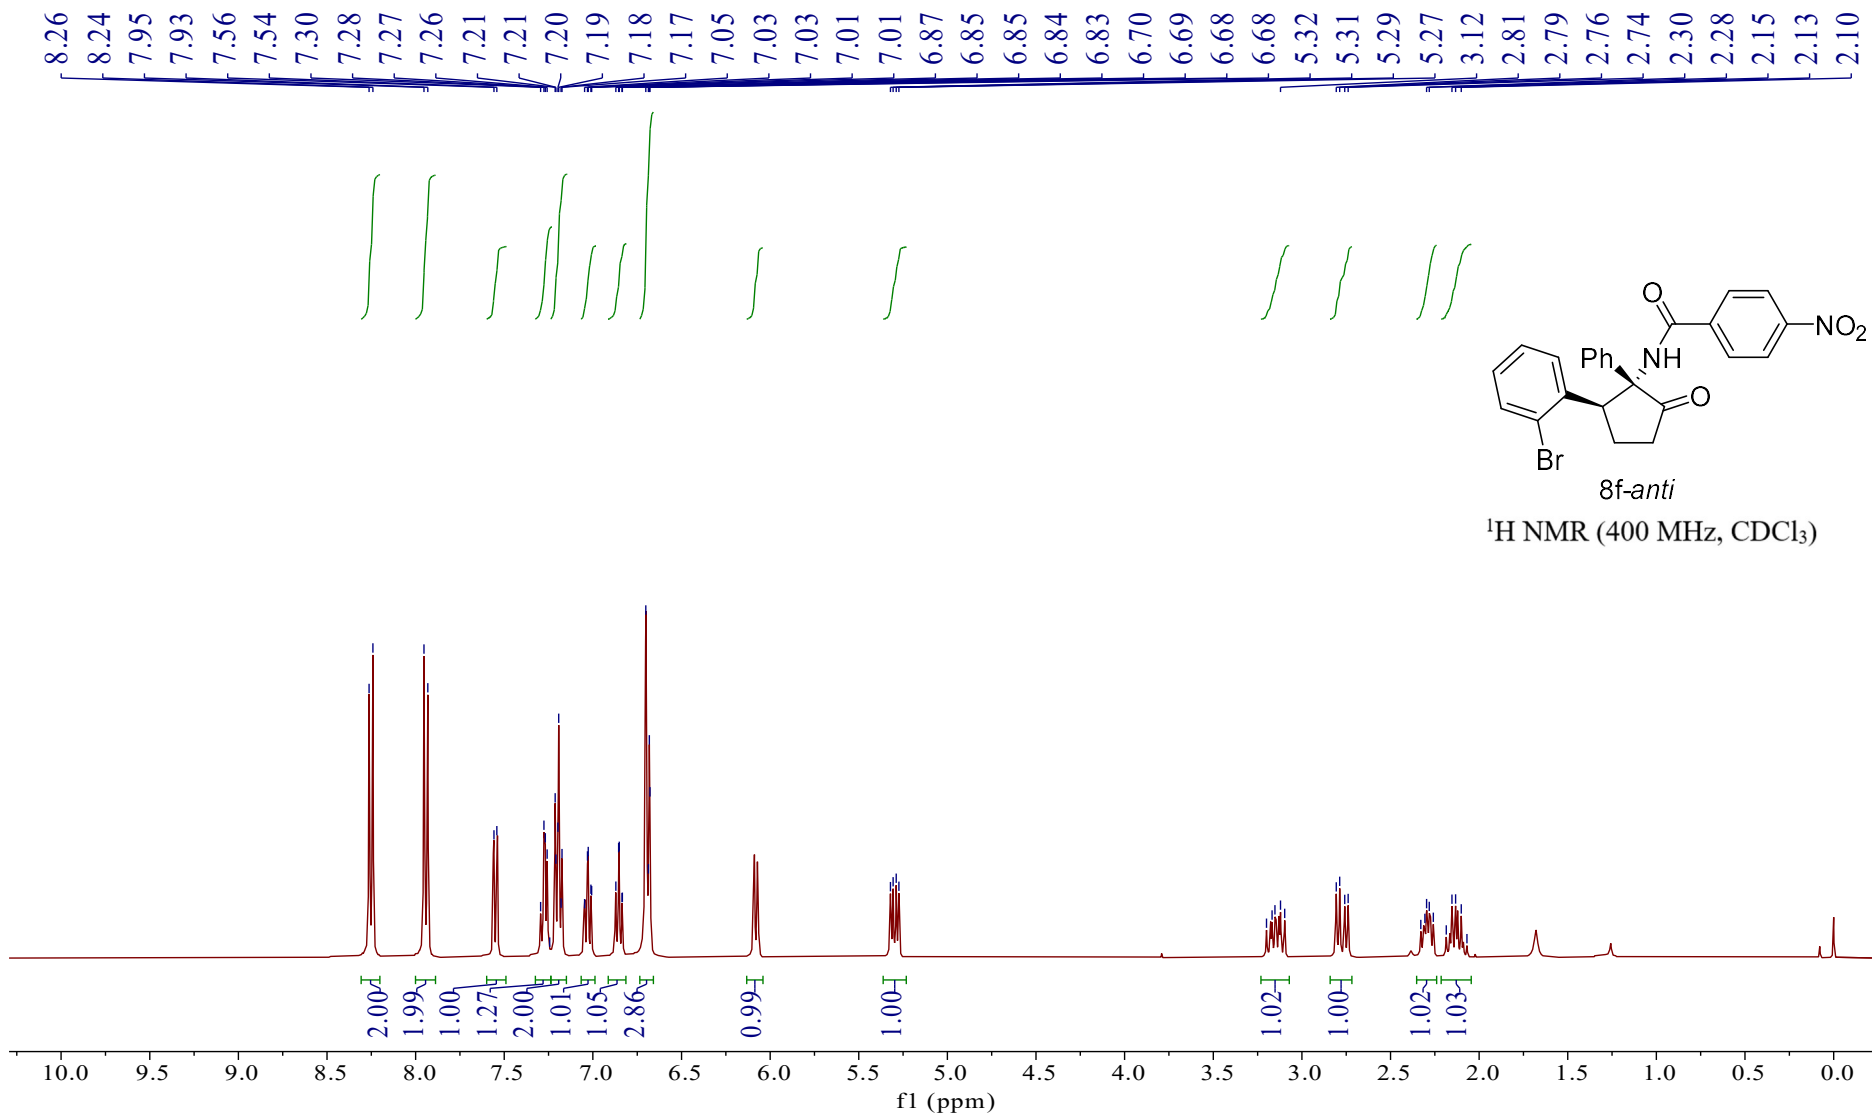

NMR-230

-215.4

-165.8

-149.8

-139.6

-138.1

-136.1

-133.0

-130.5

-128.8

-128.7

-128.6

-127.2

-126.6

-125.9

-123.9

-72.8

-47.4

-37.6

-24.3

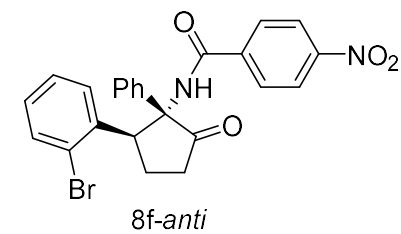

<sup>13</sup>C NMR (100 MHz, CDCl<sub>3</sub>)

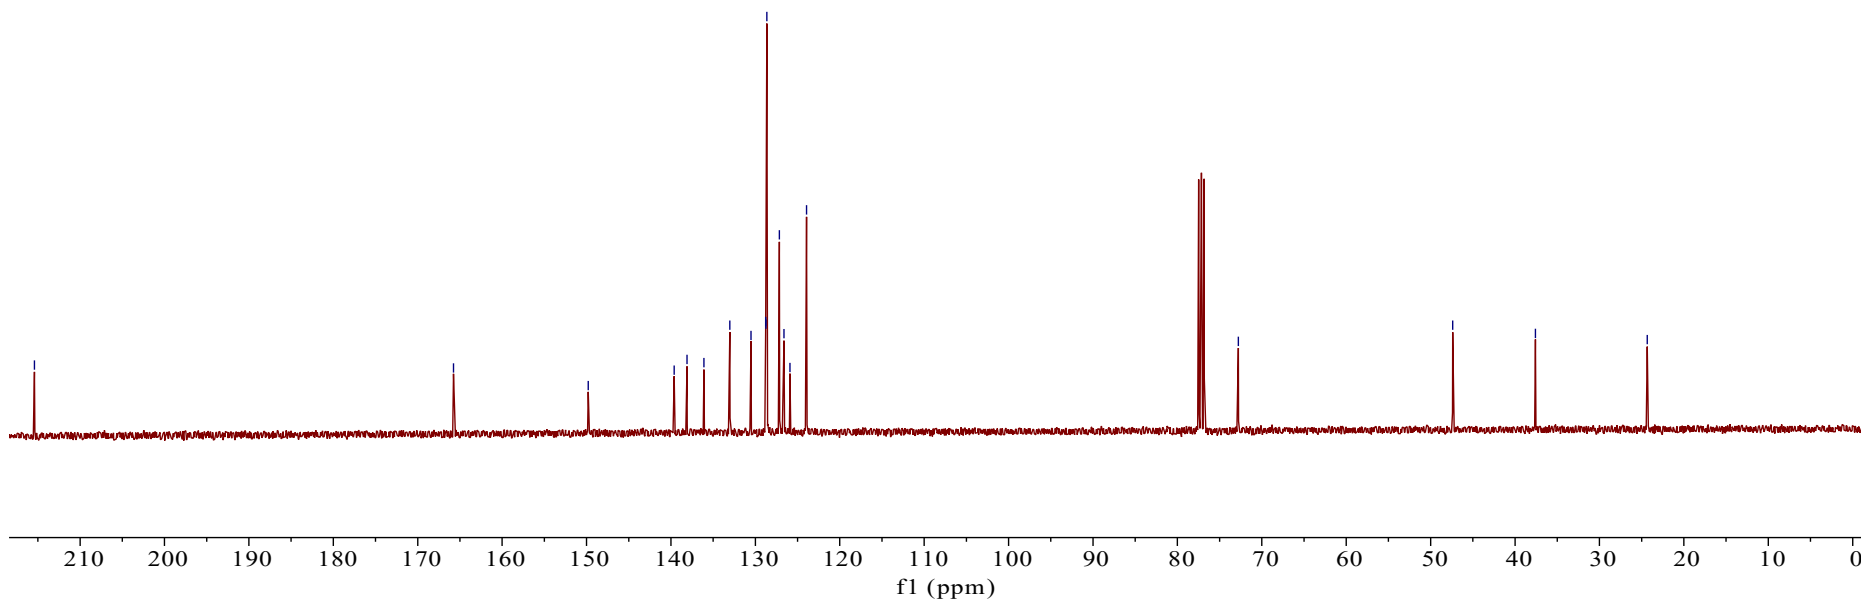

NMR-231

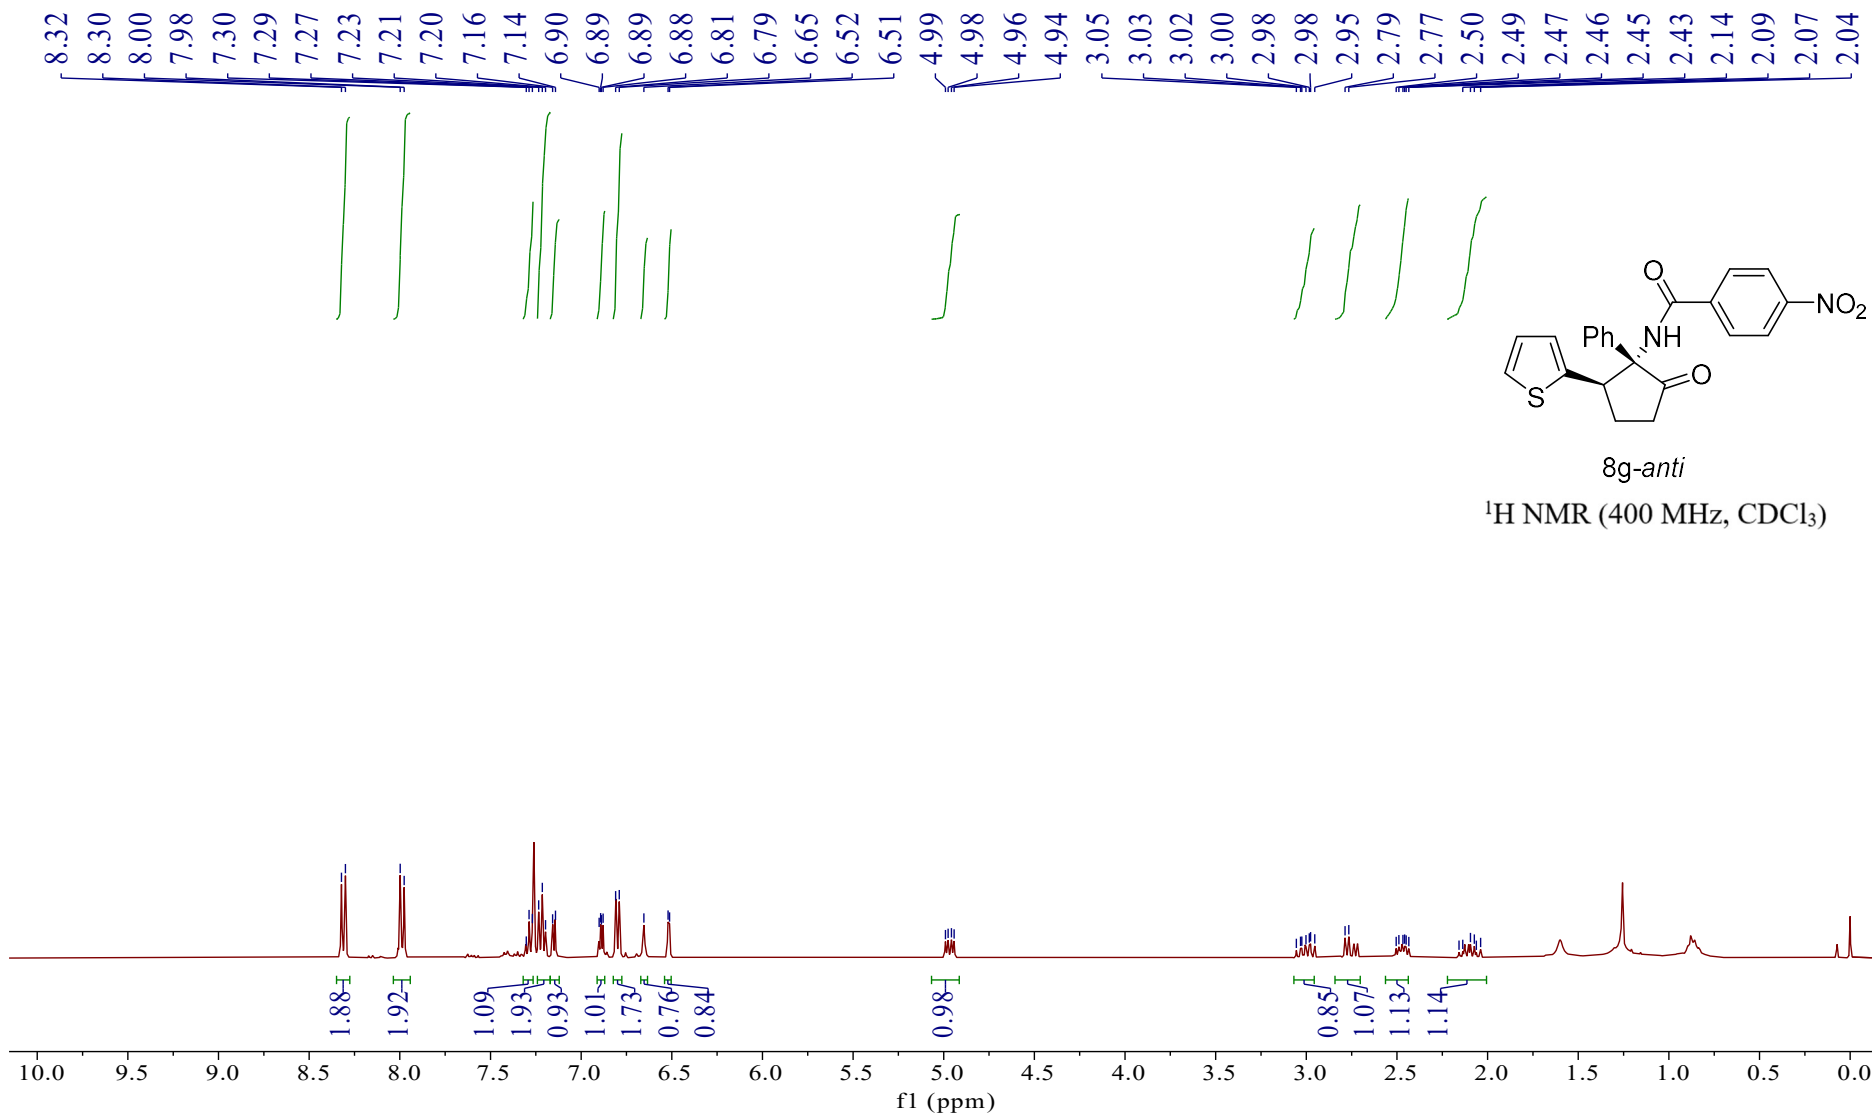

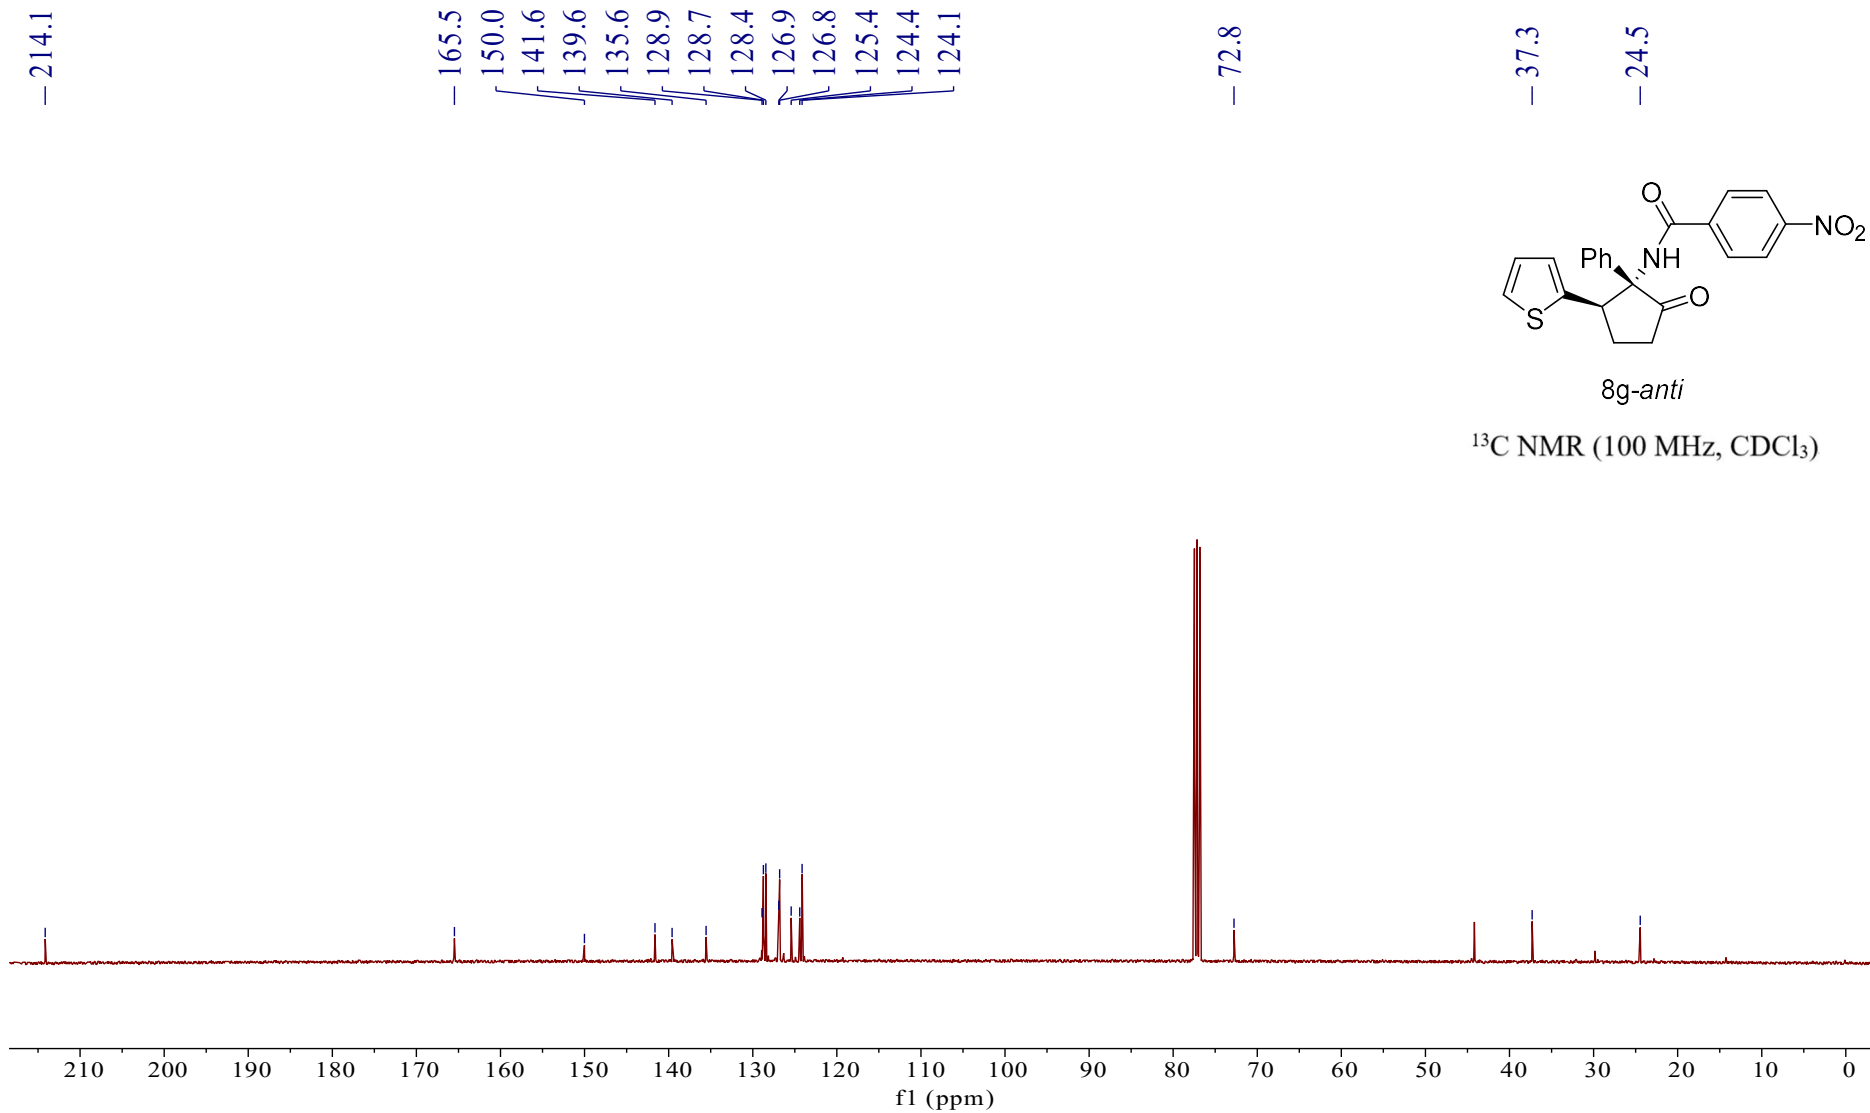

NMR-233

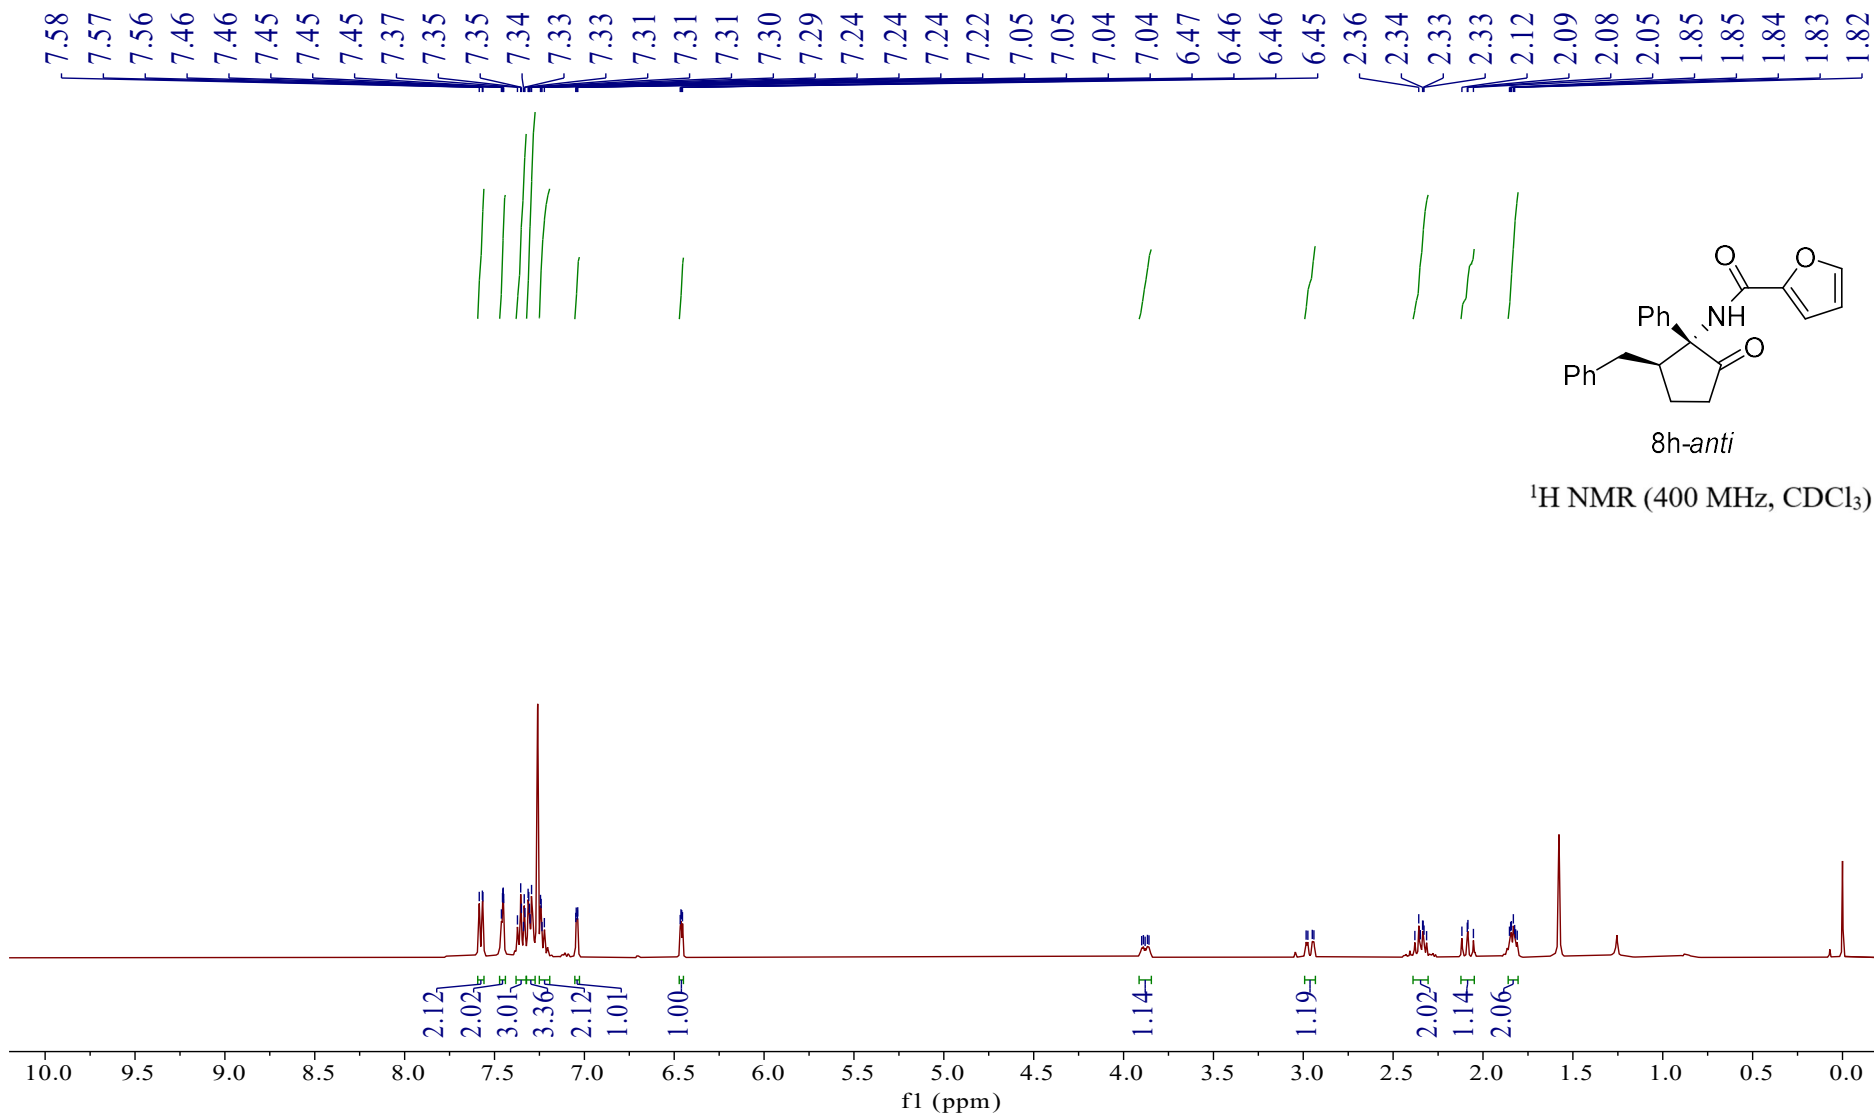

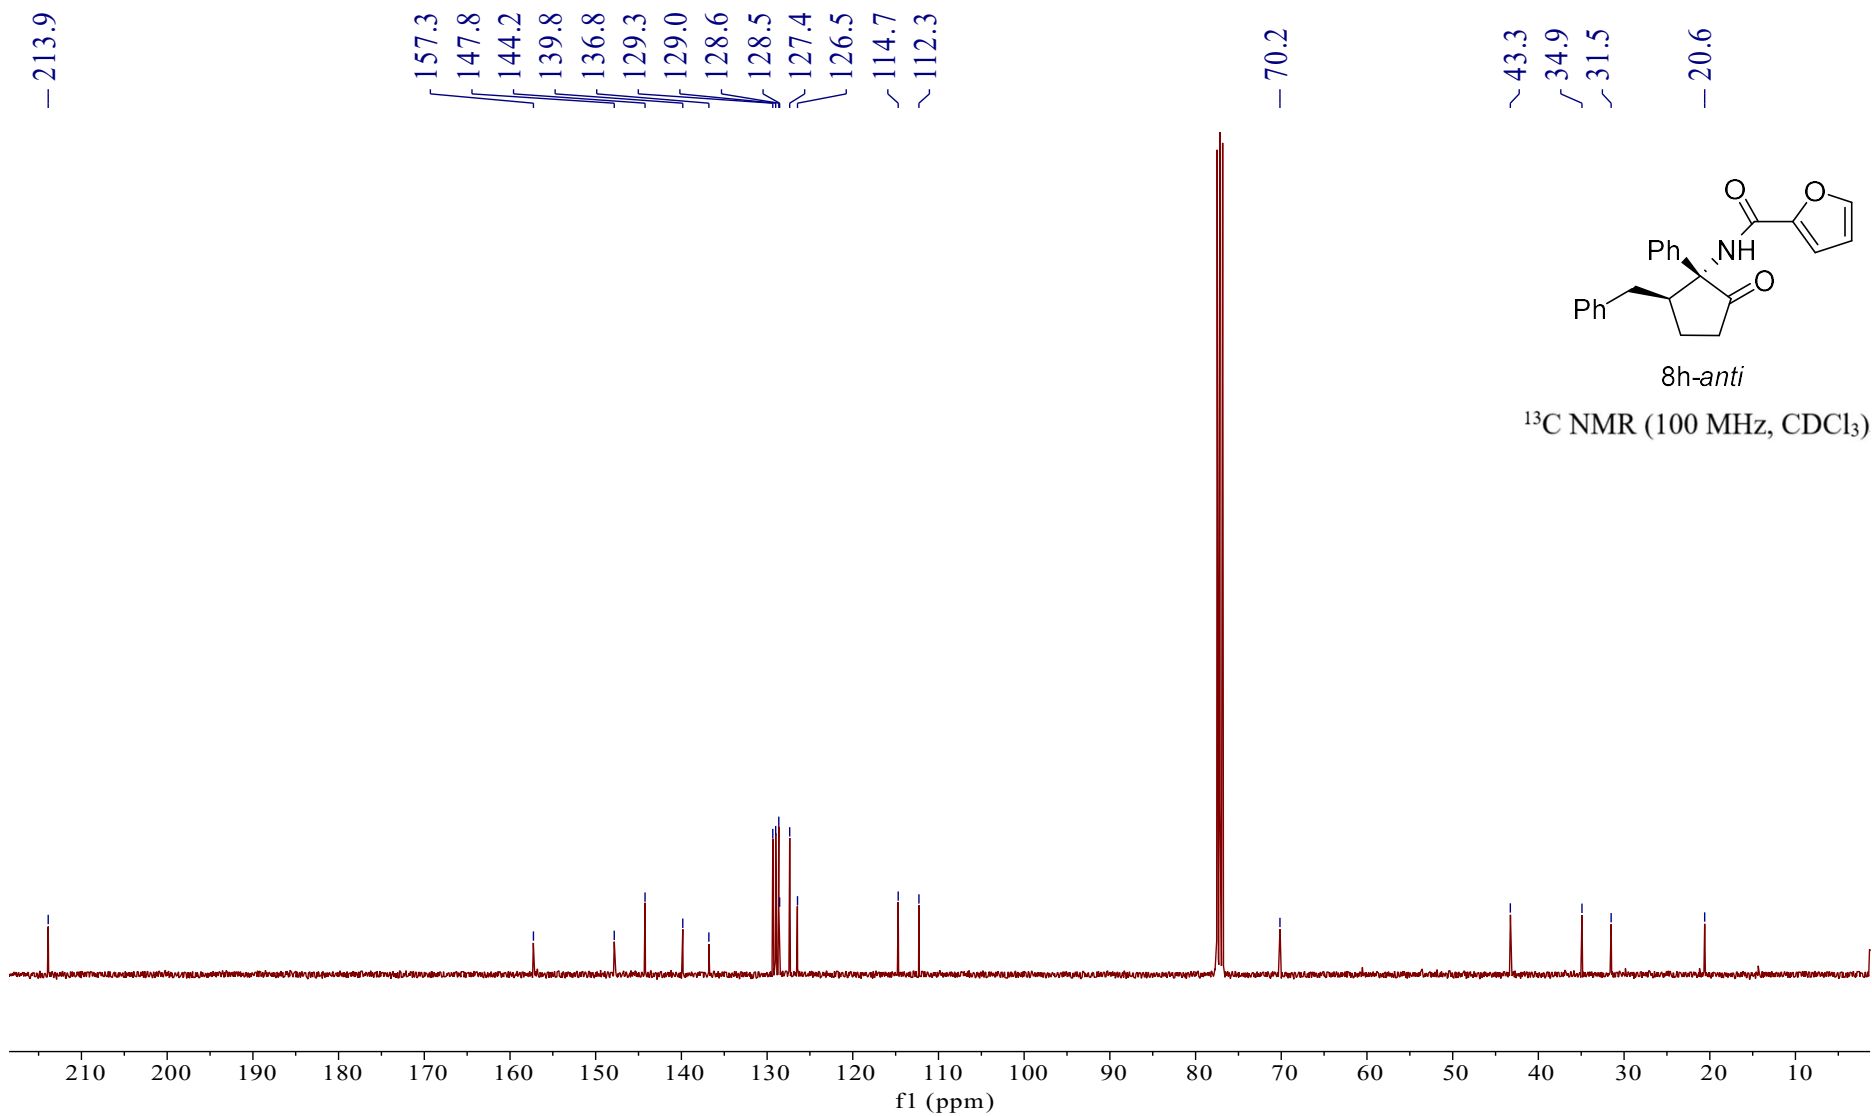

NMR-235

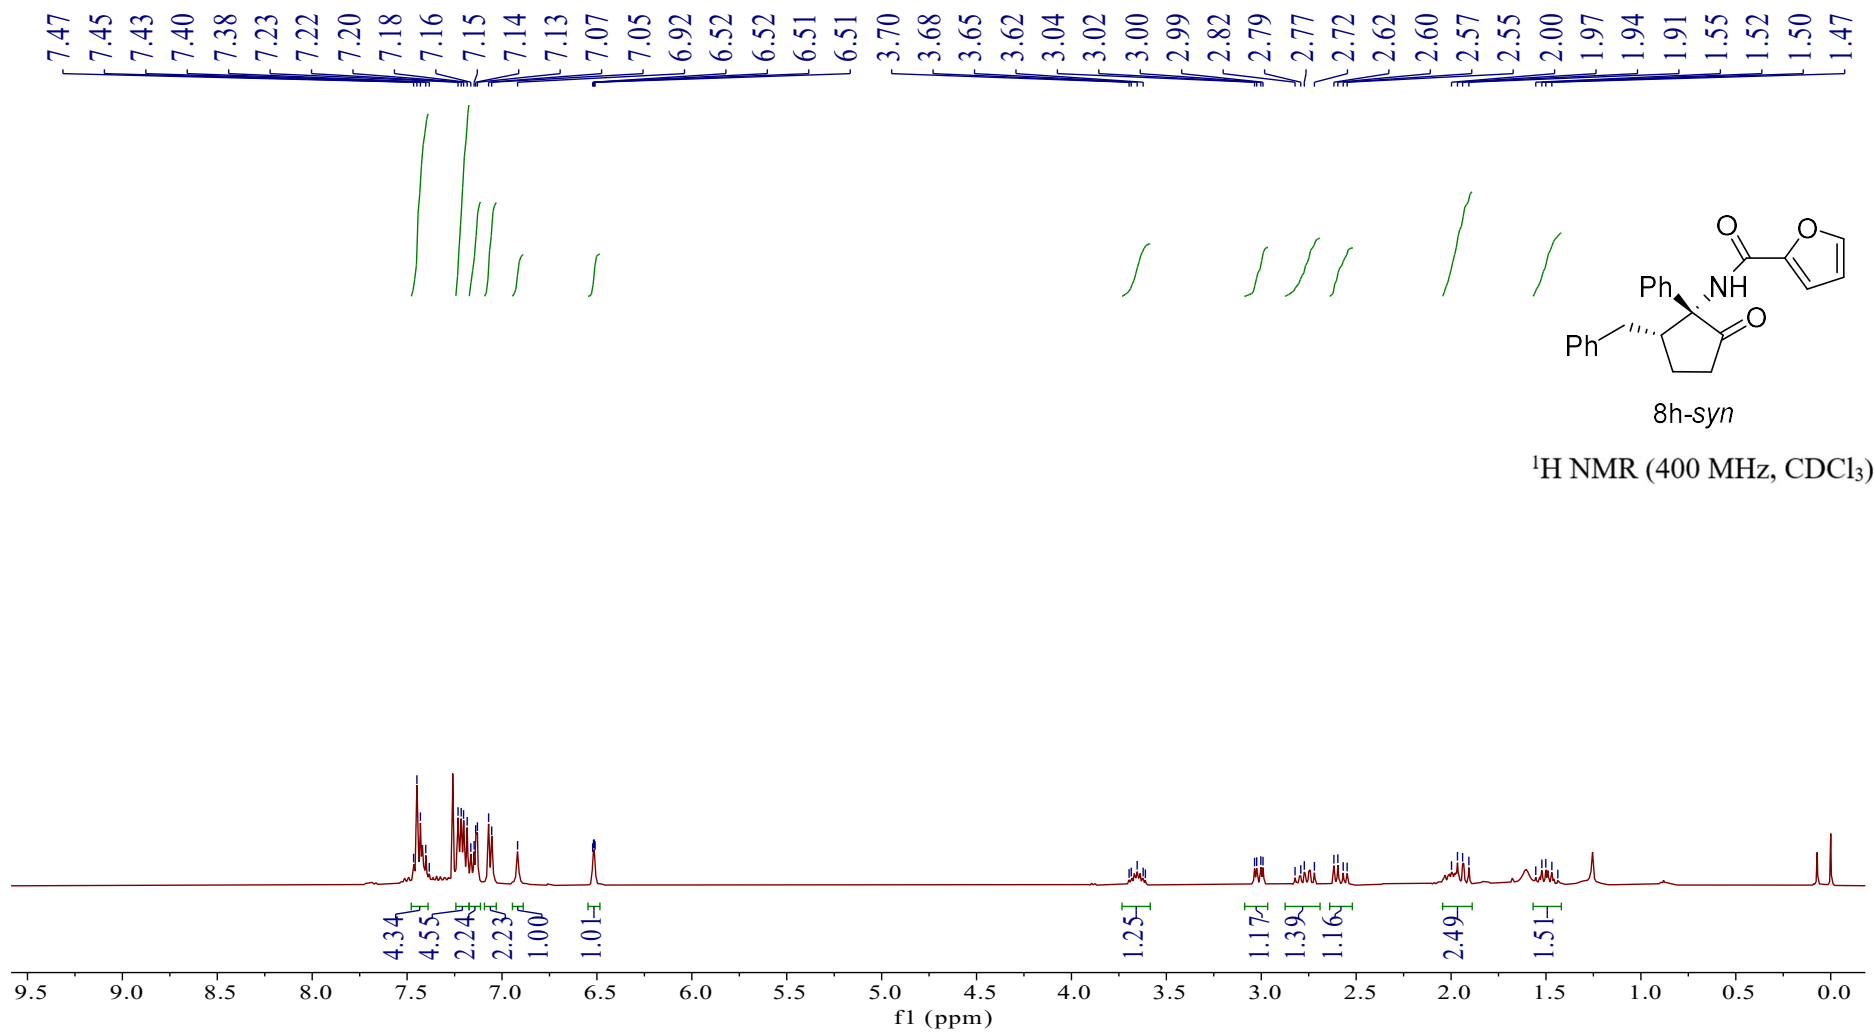



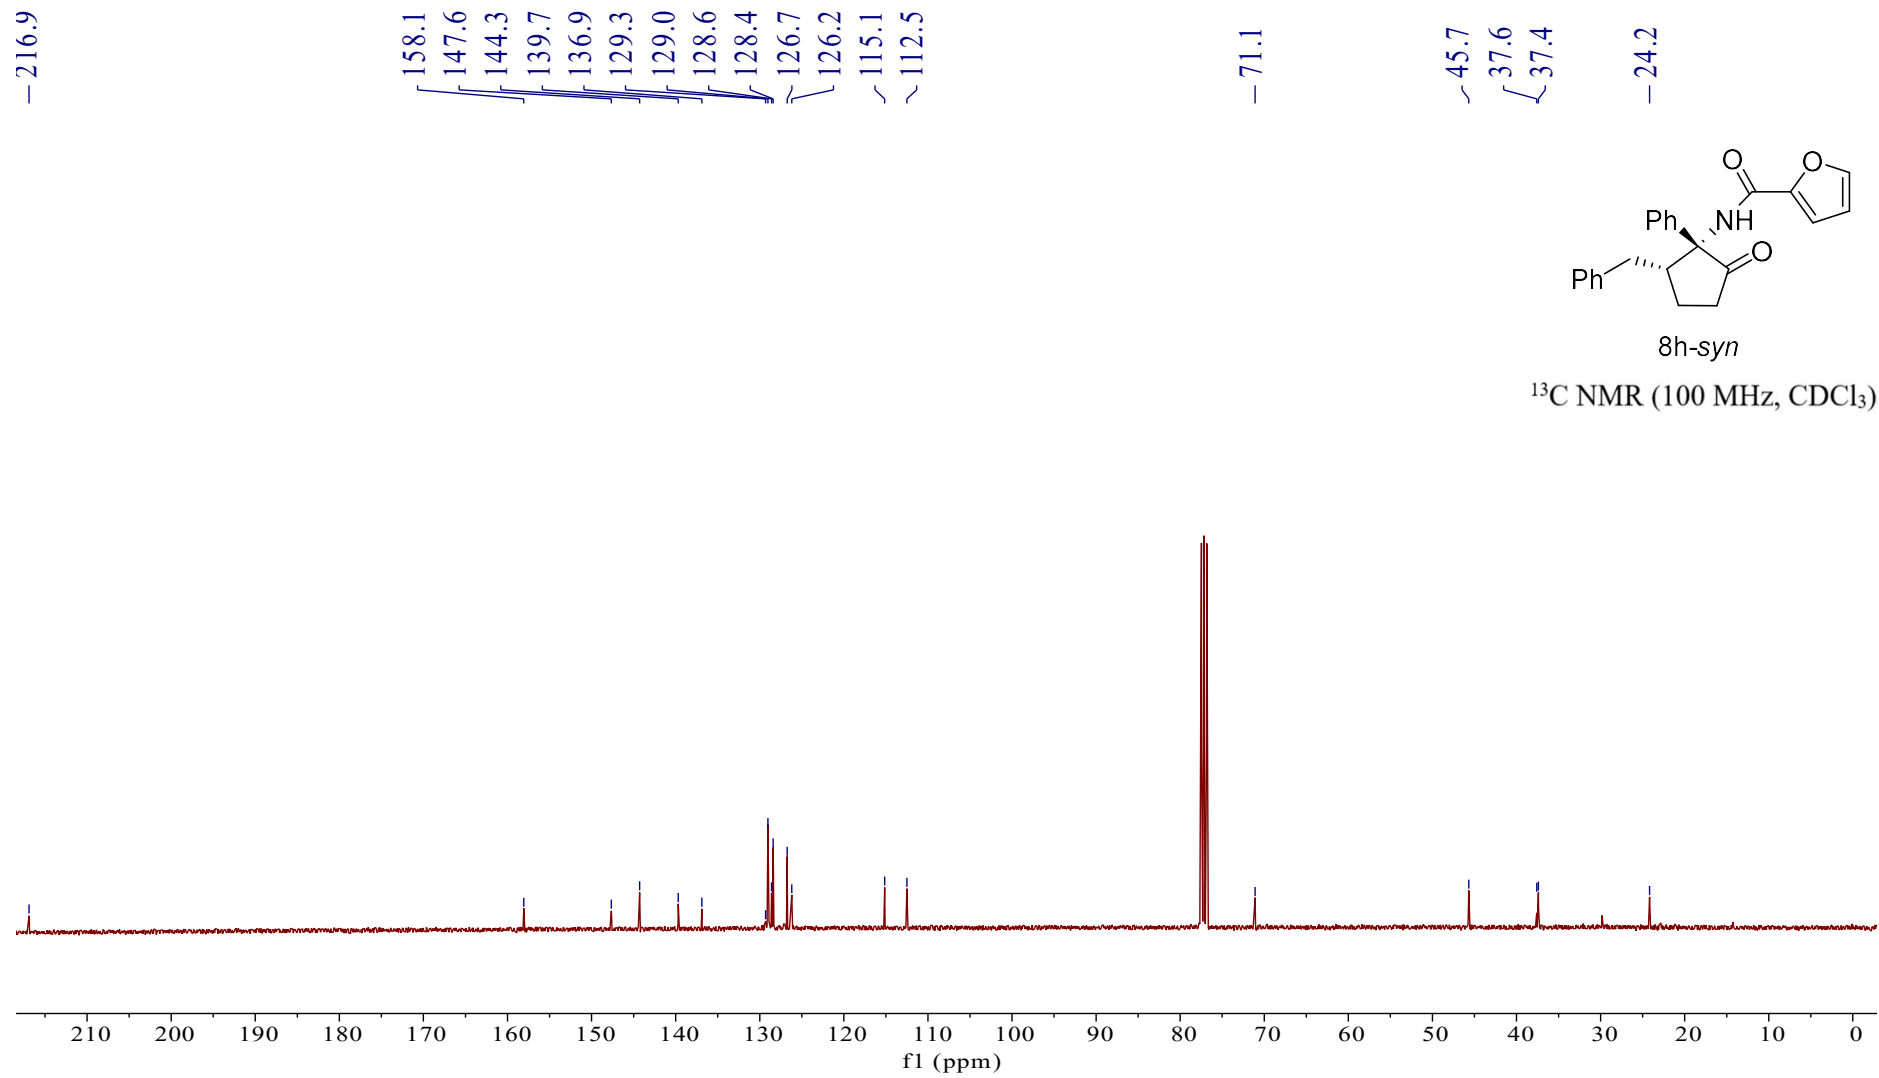

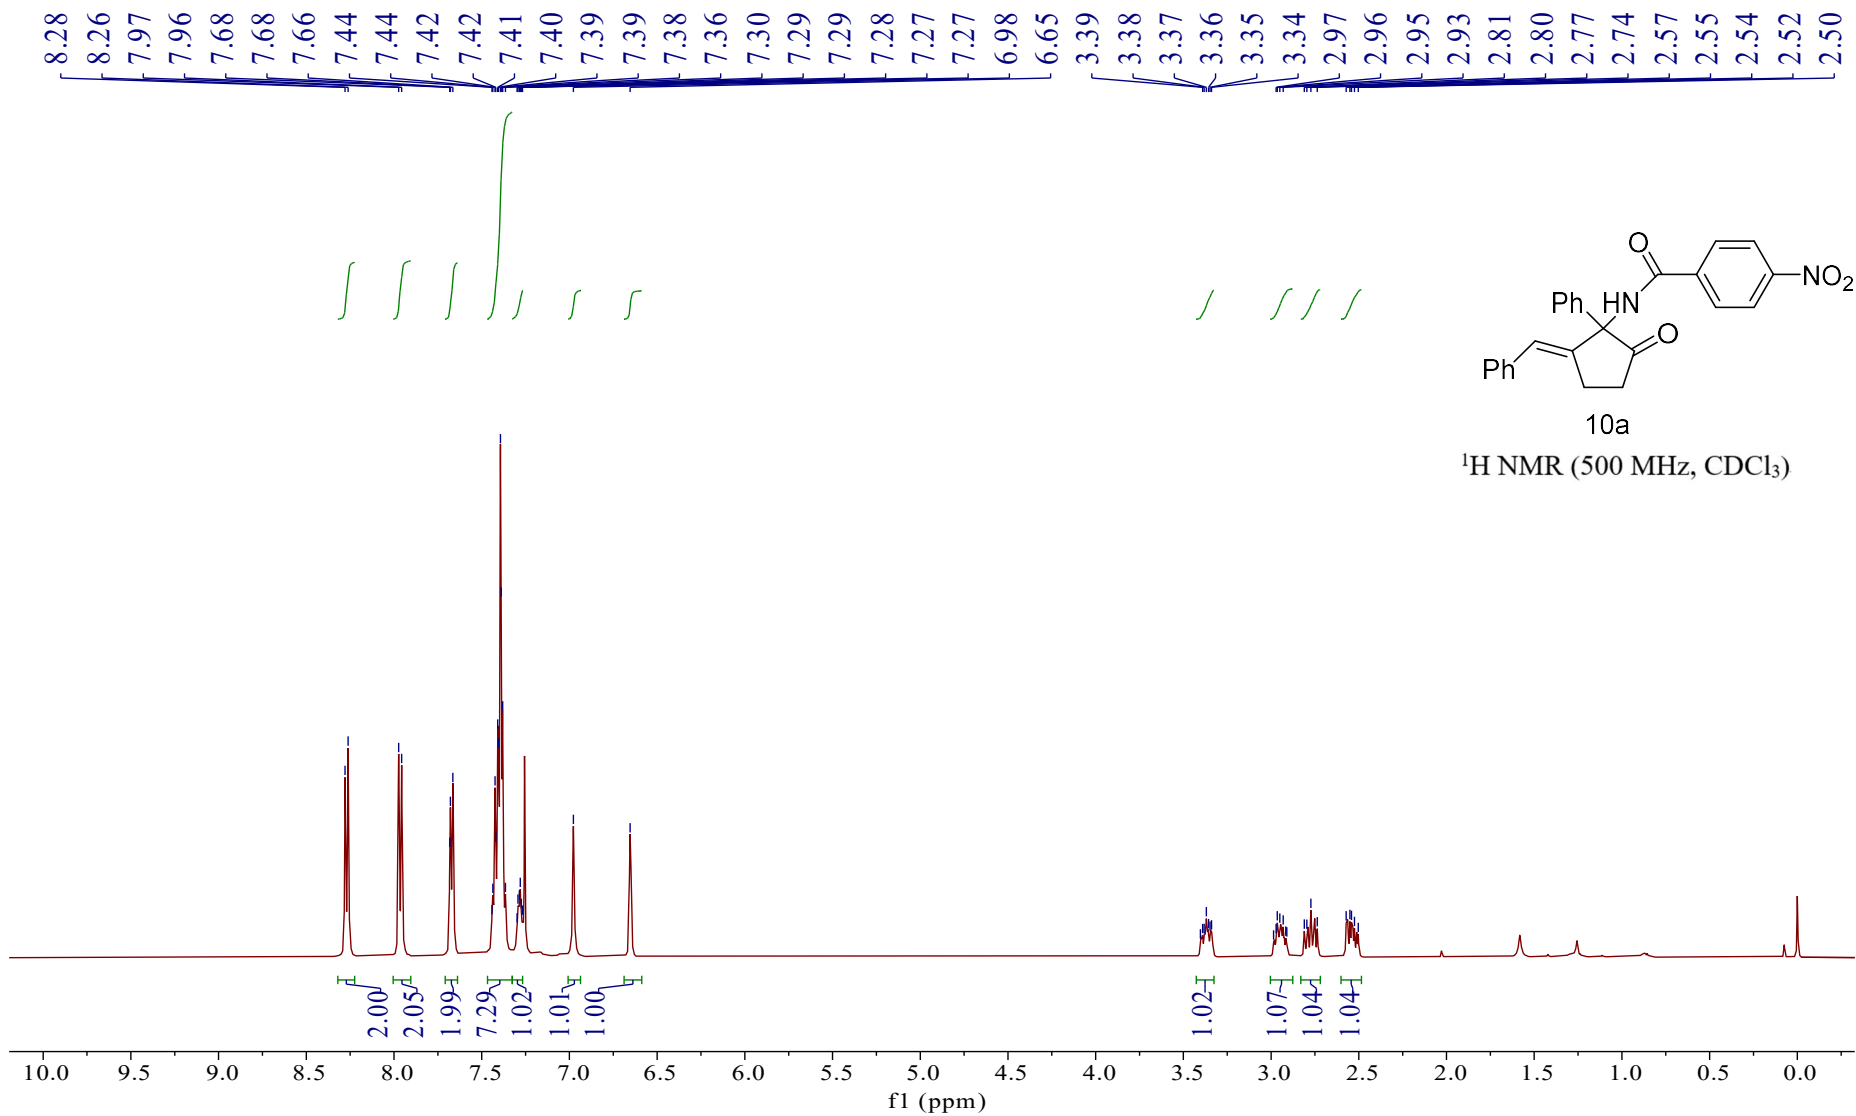

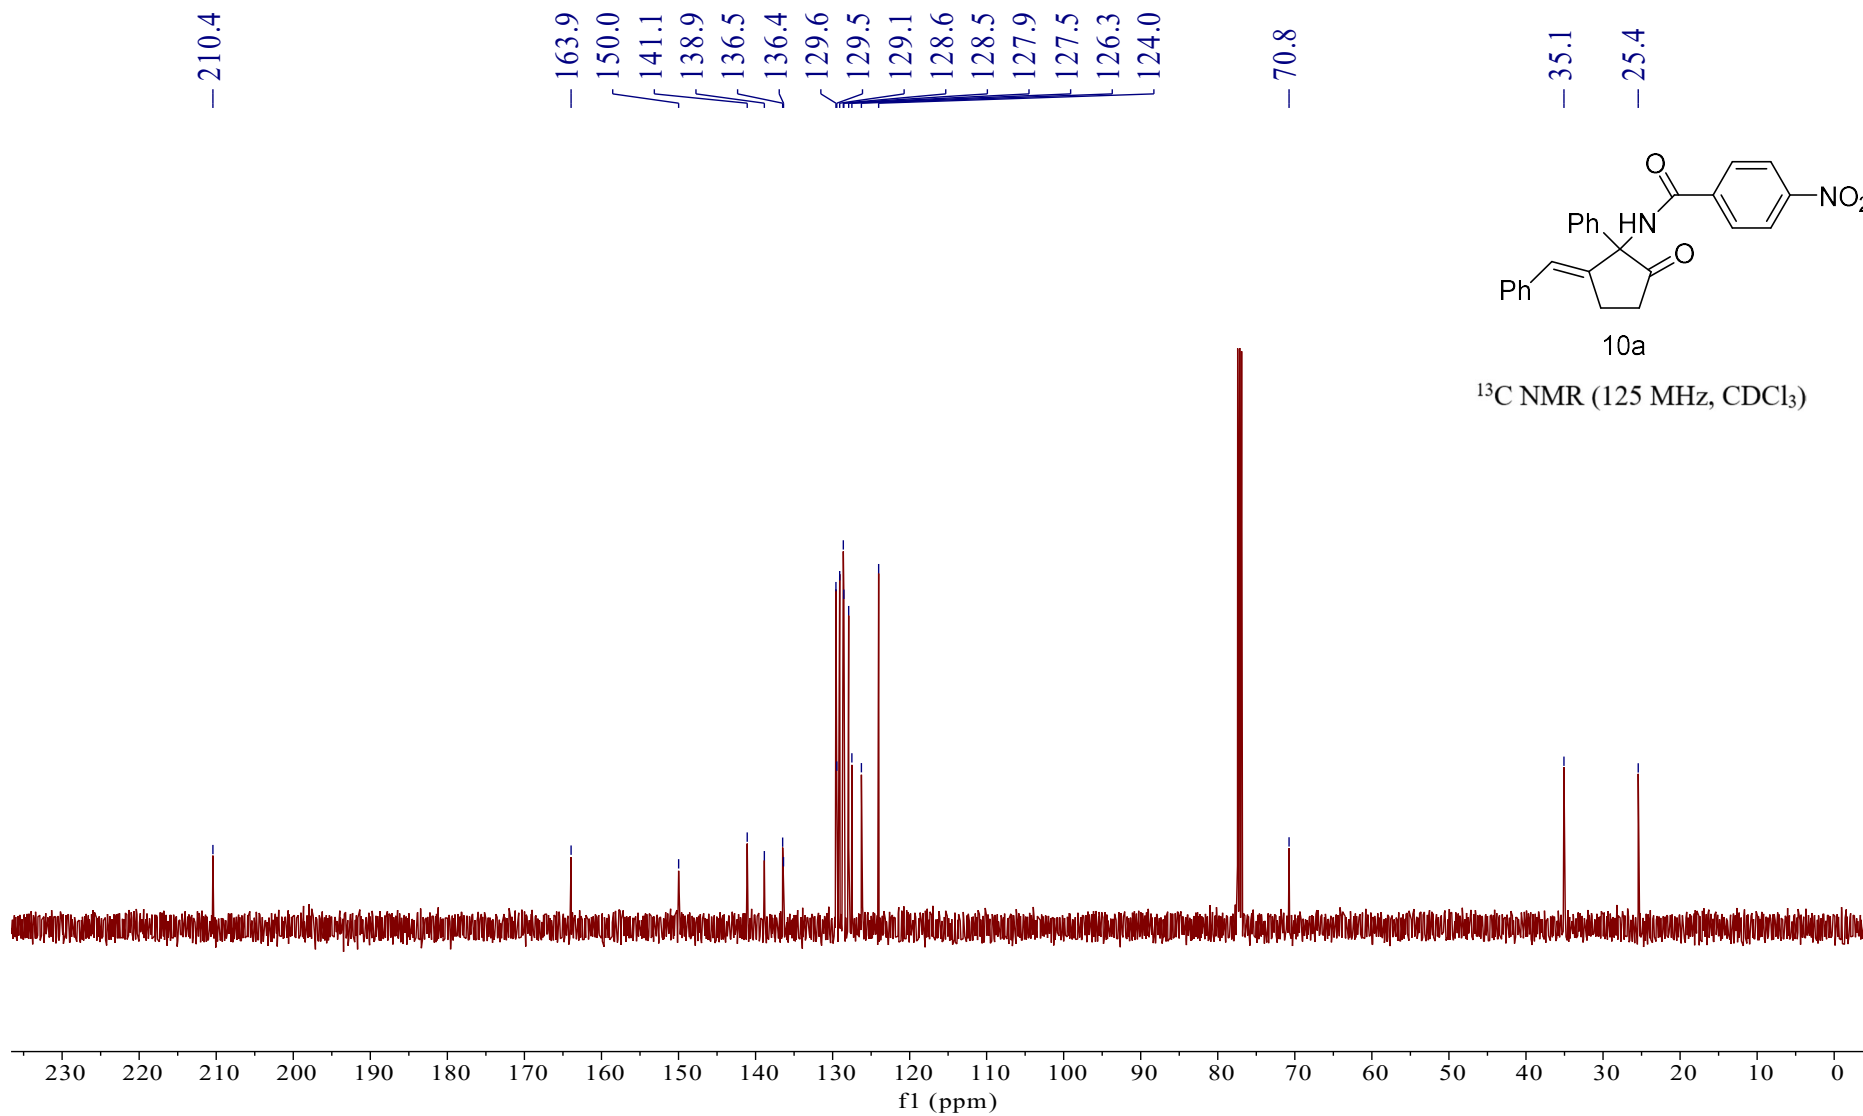

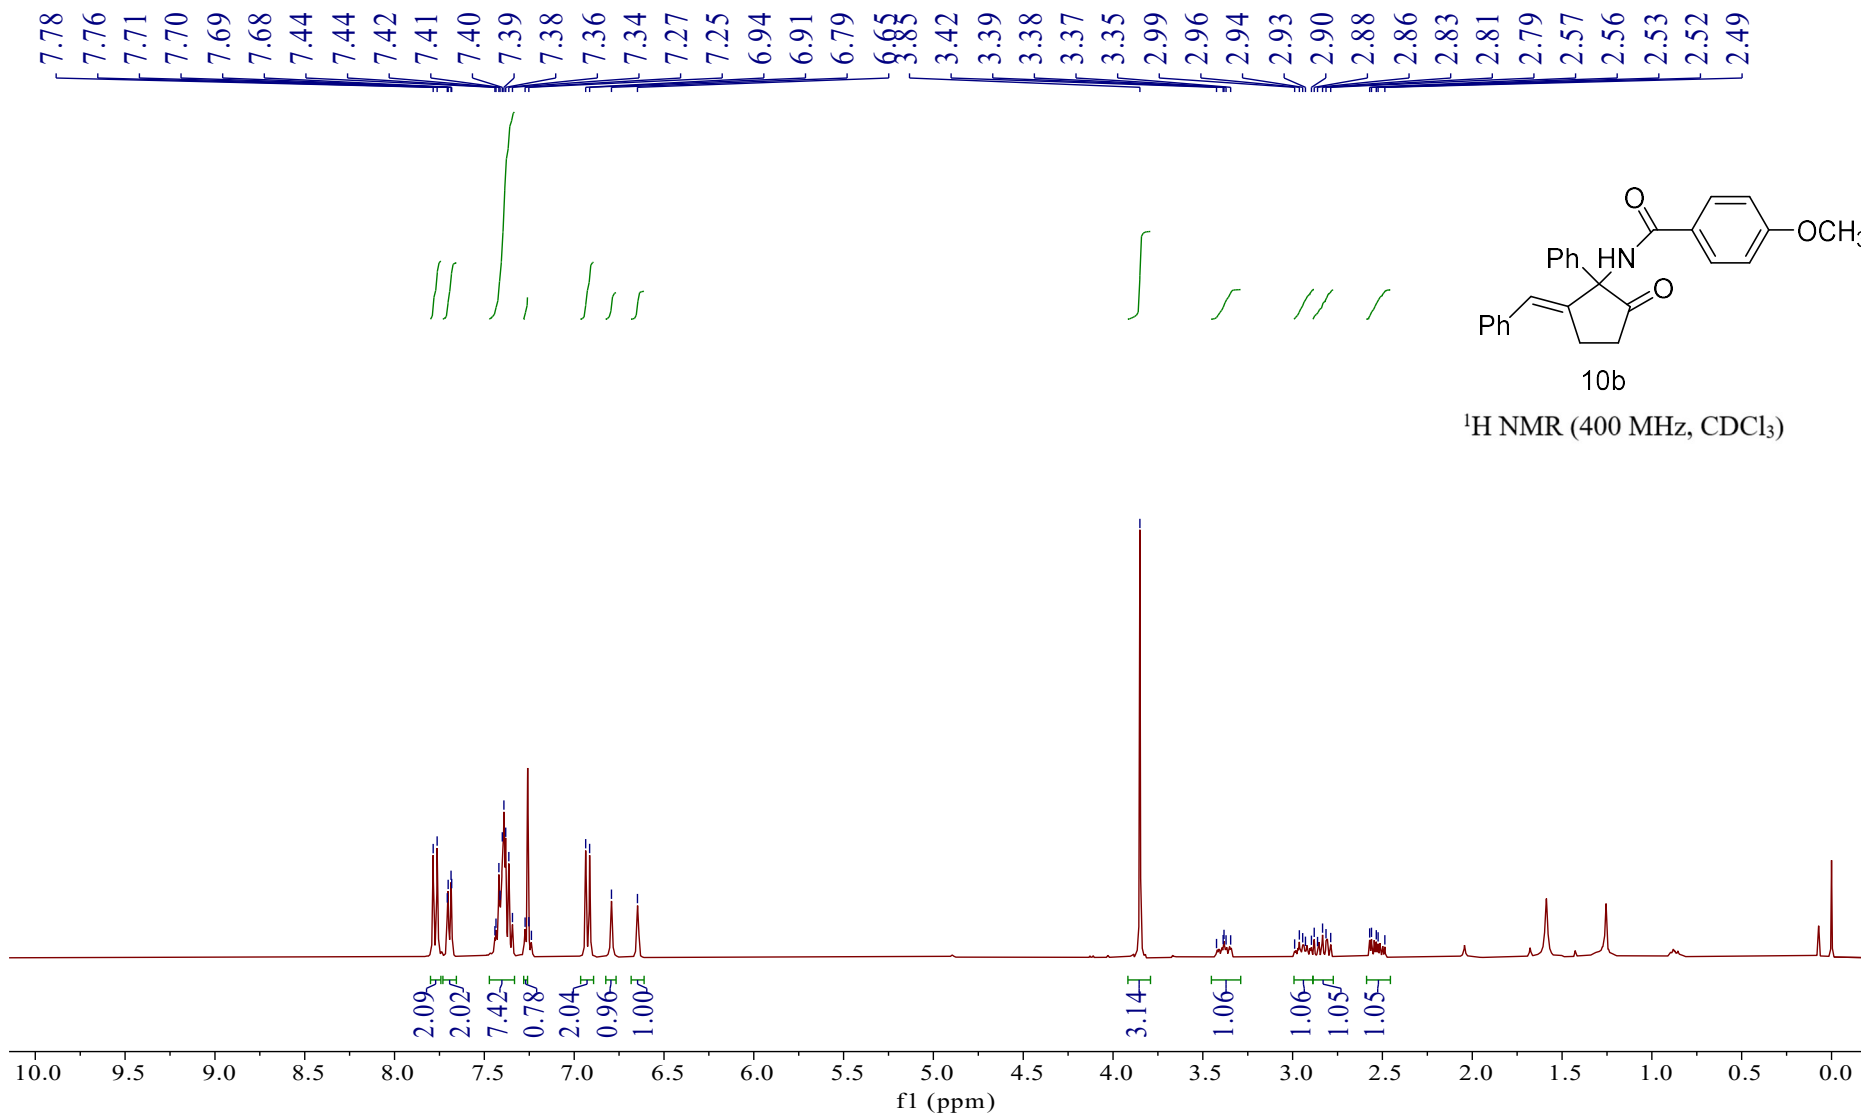

NMR-240

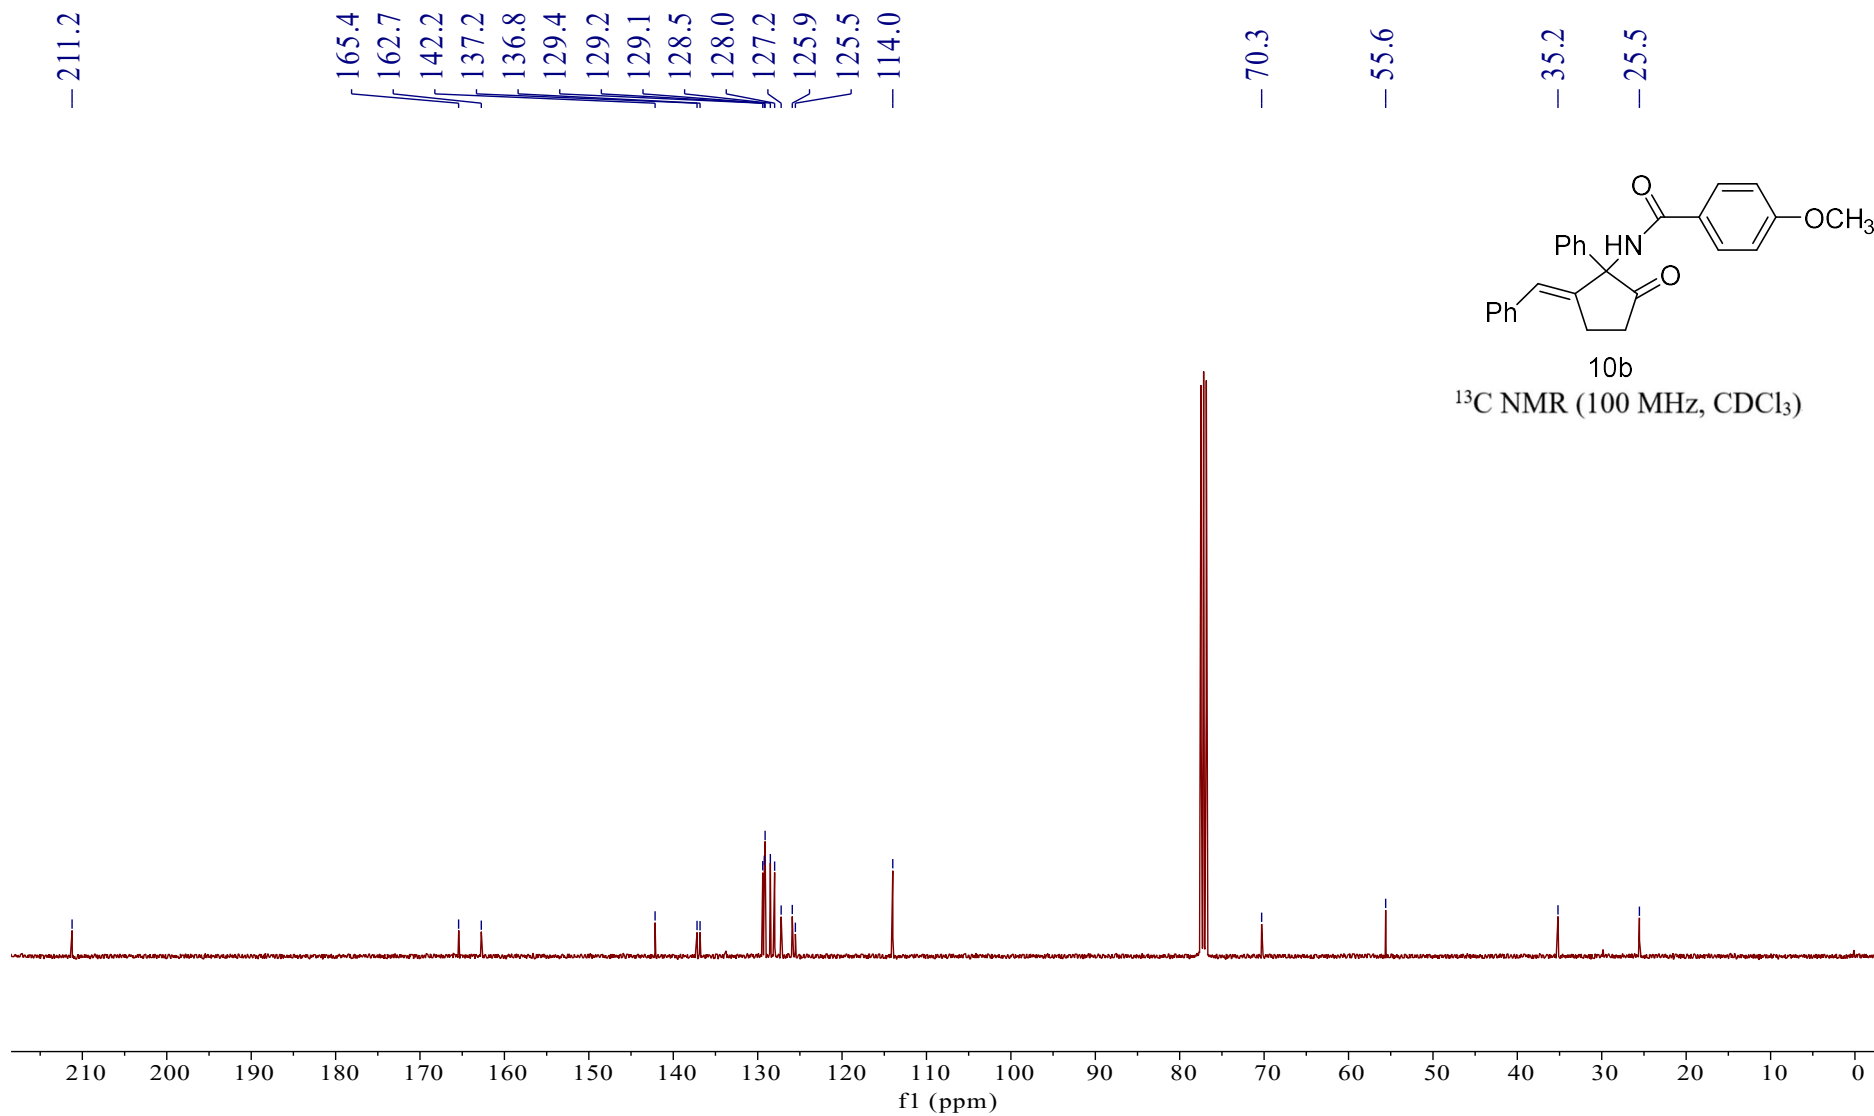

NMR-241

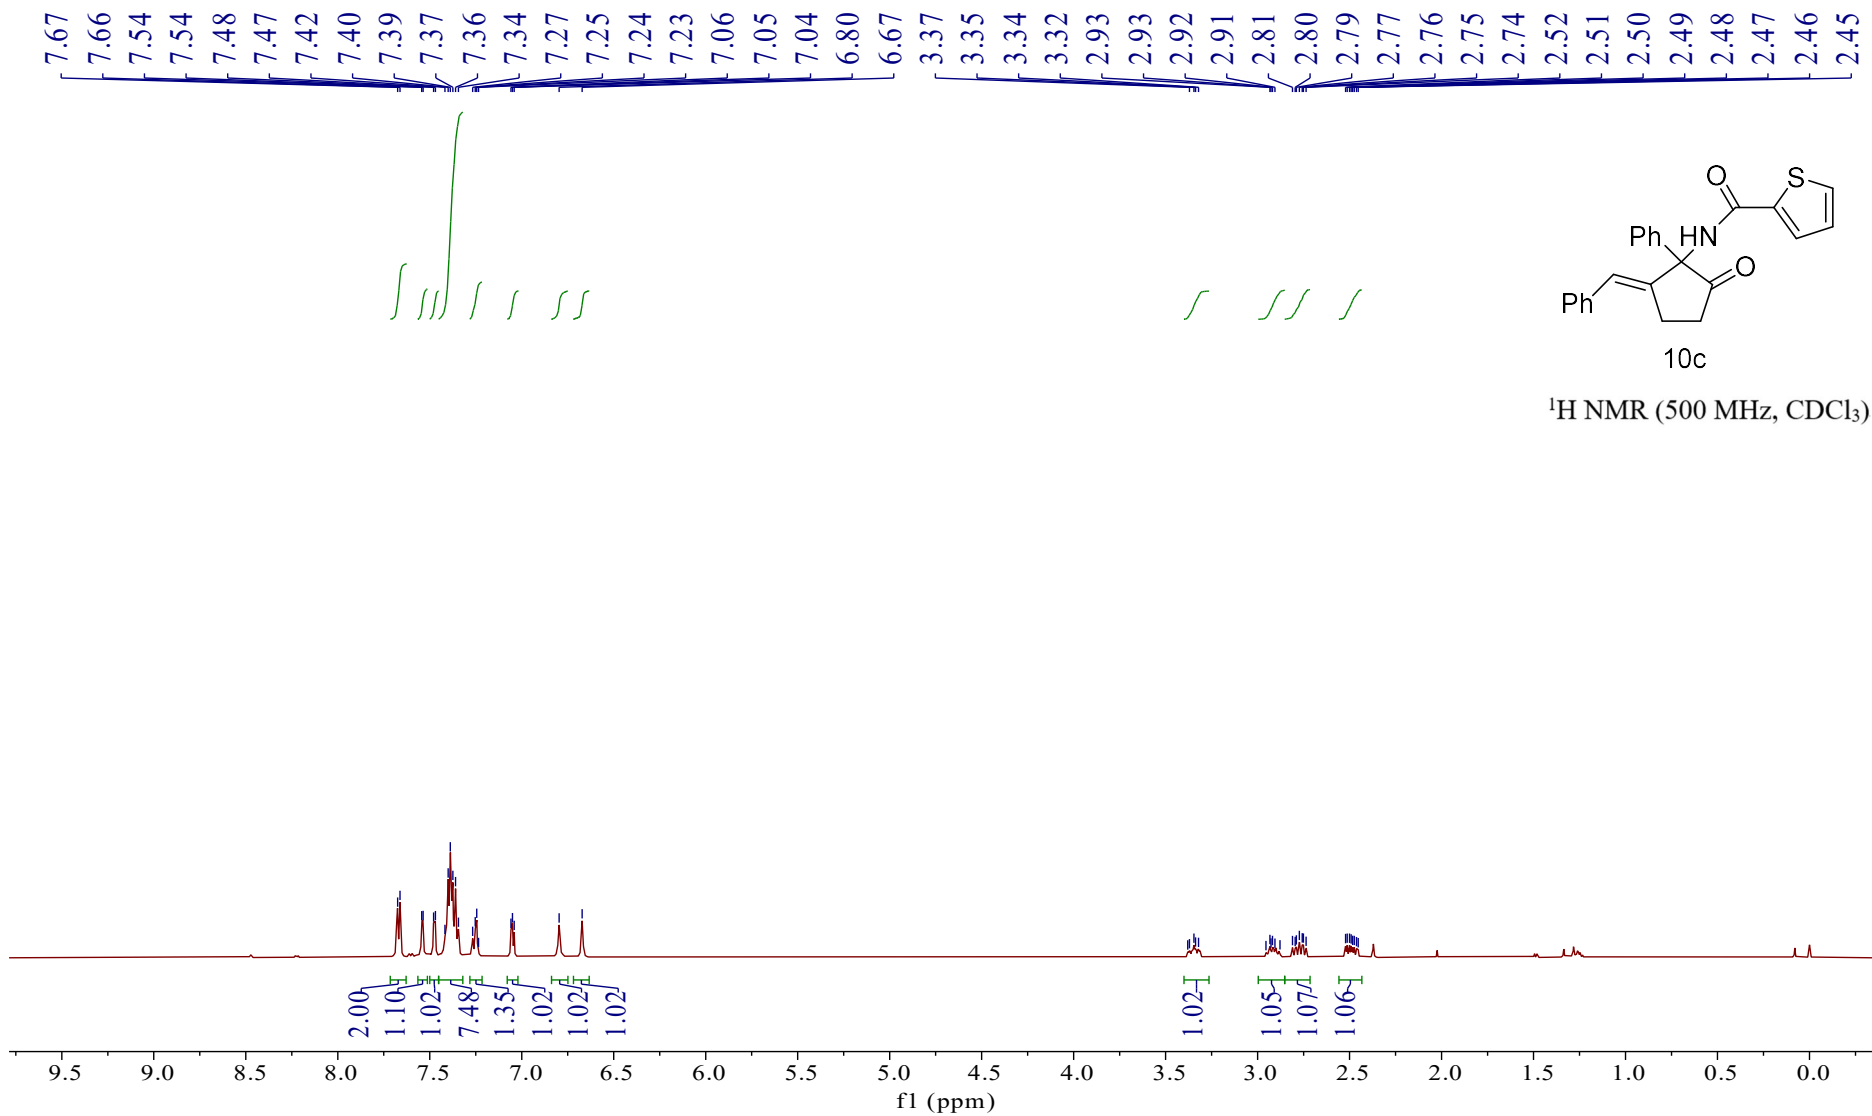

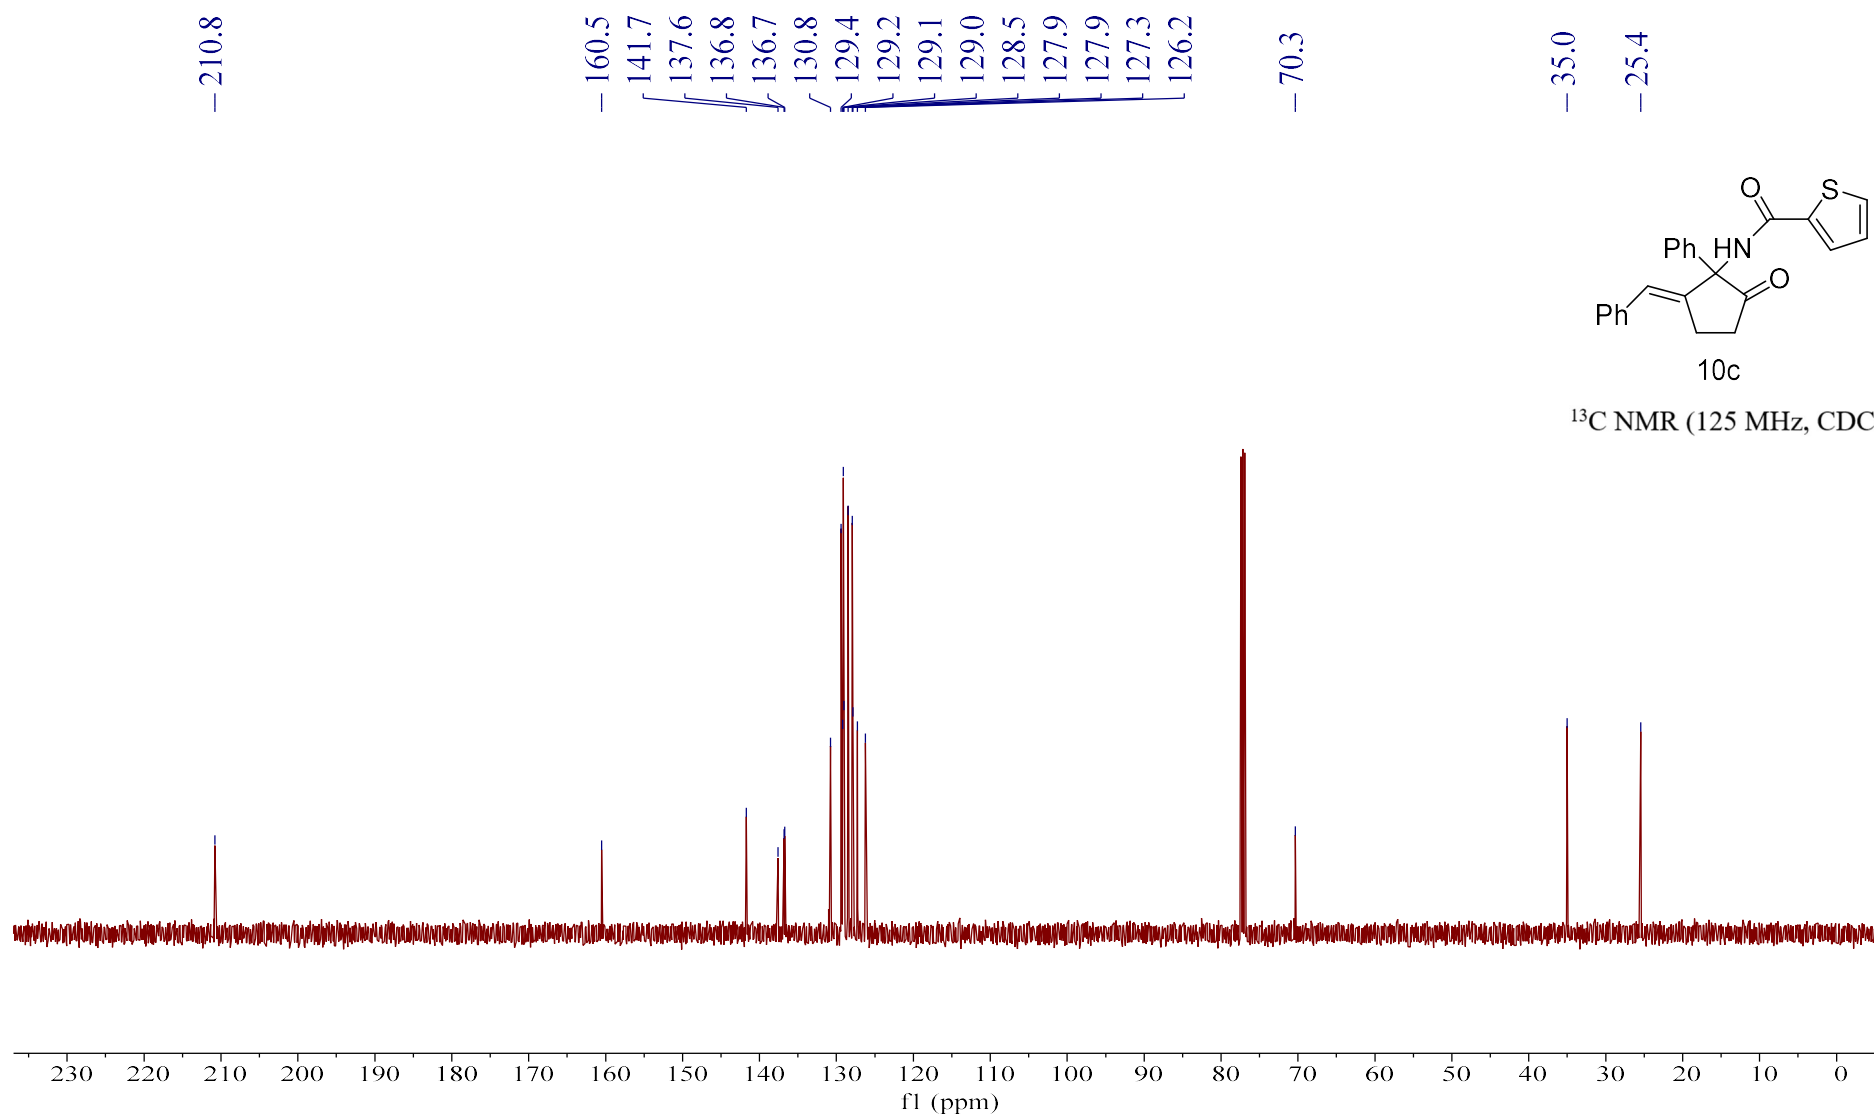

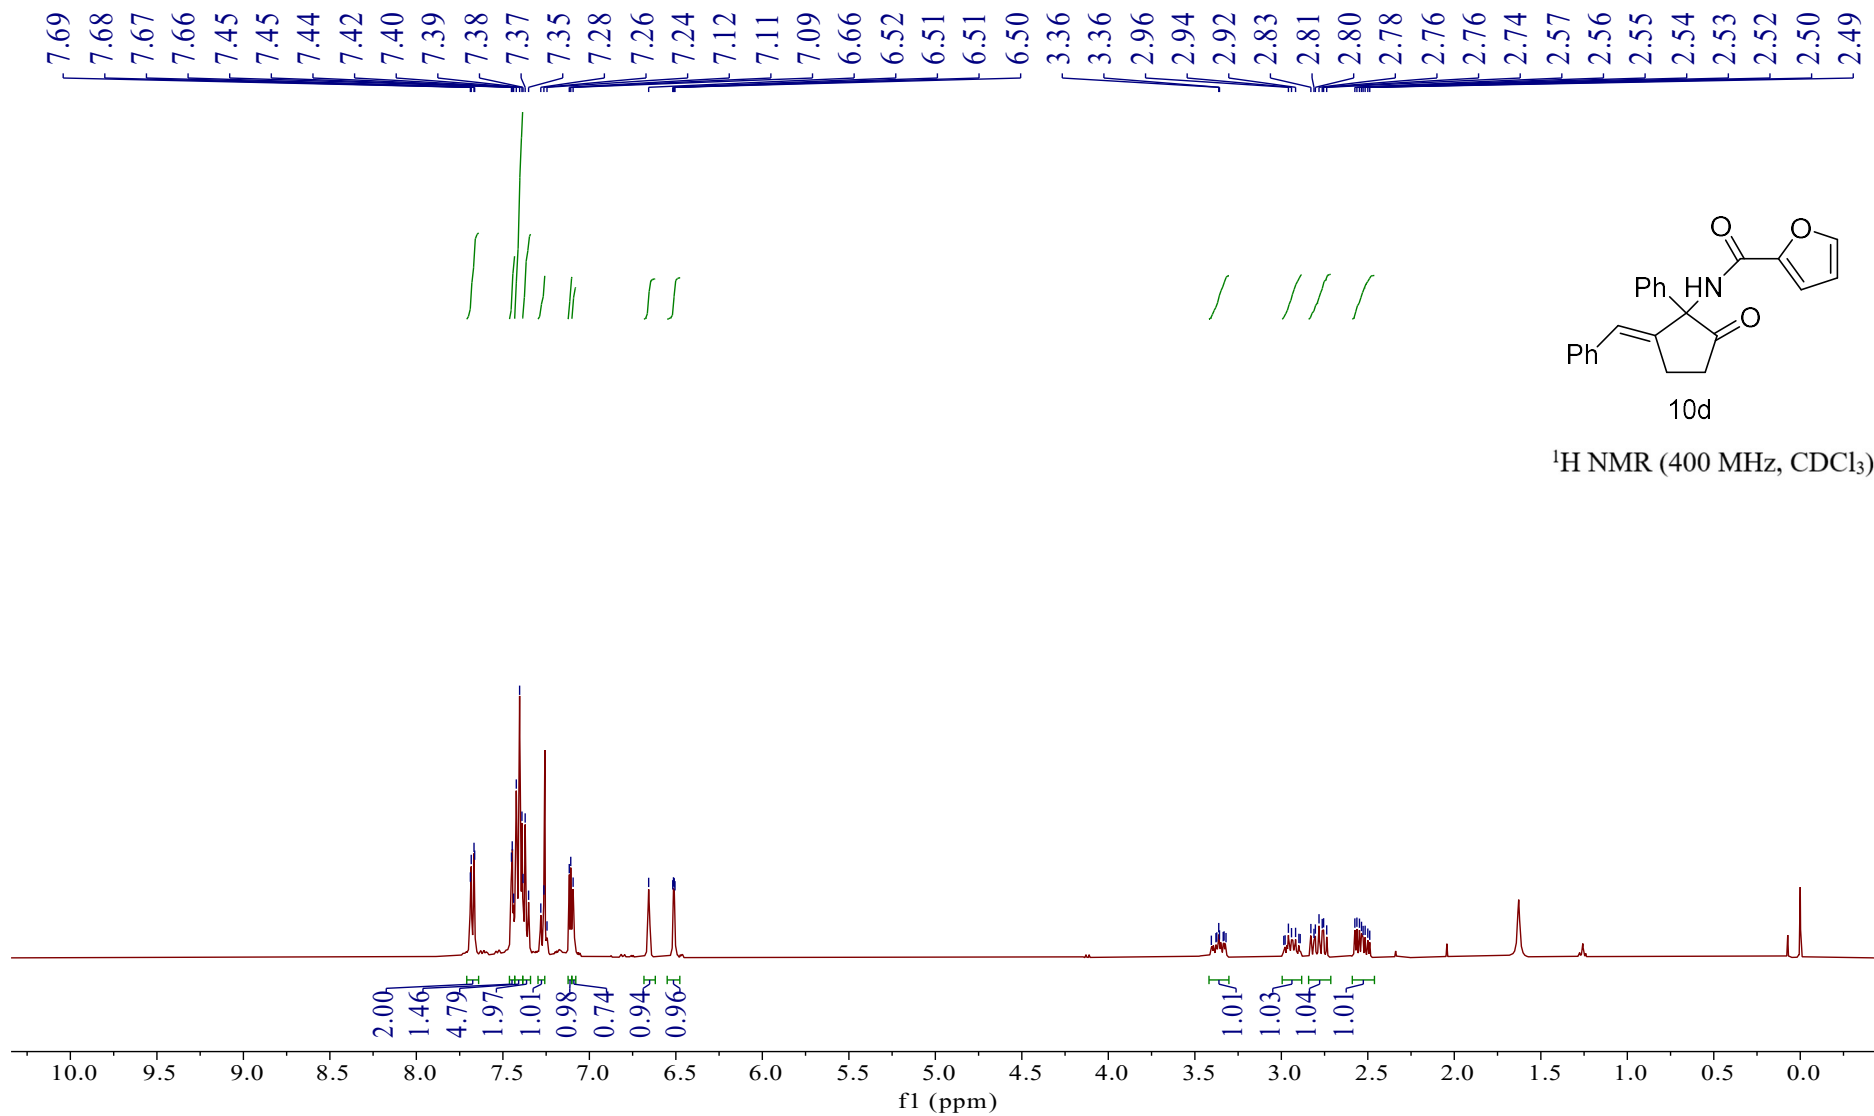

NMR-244



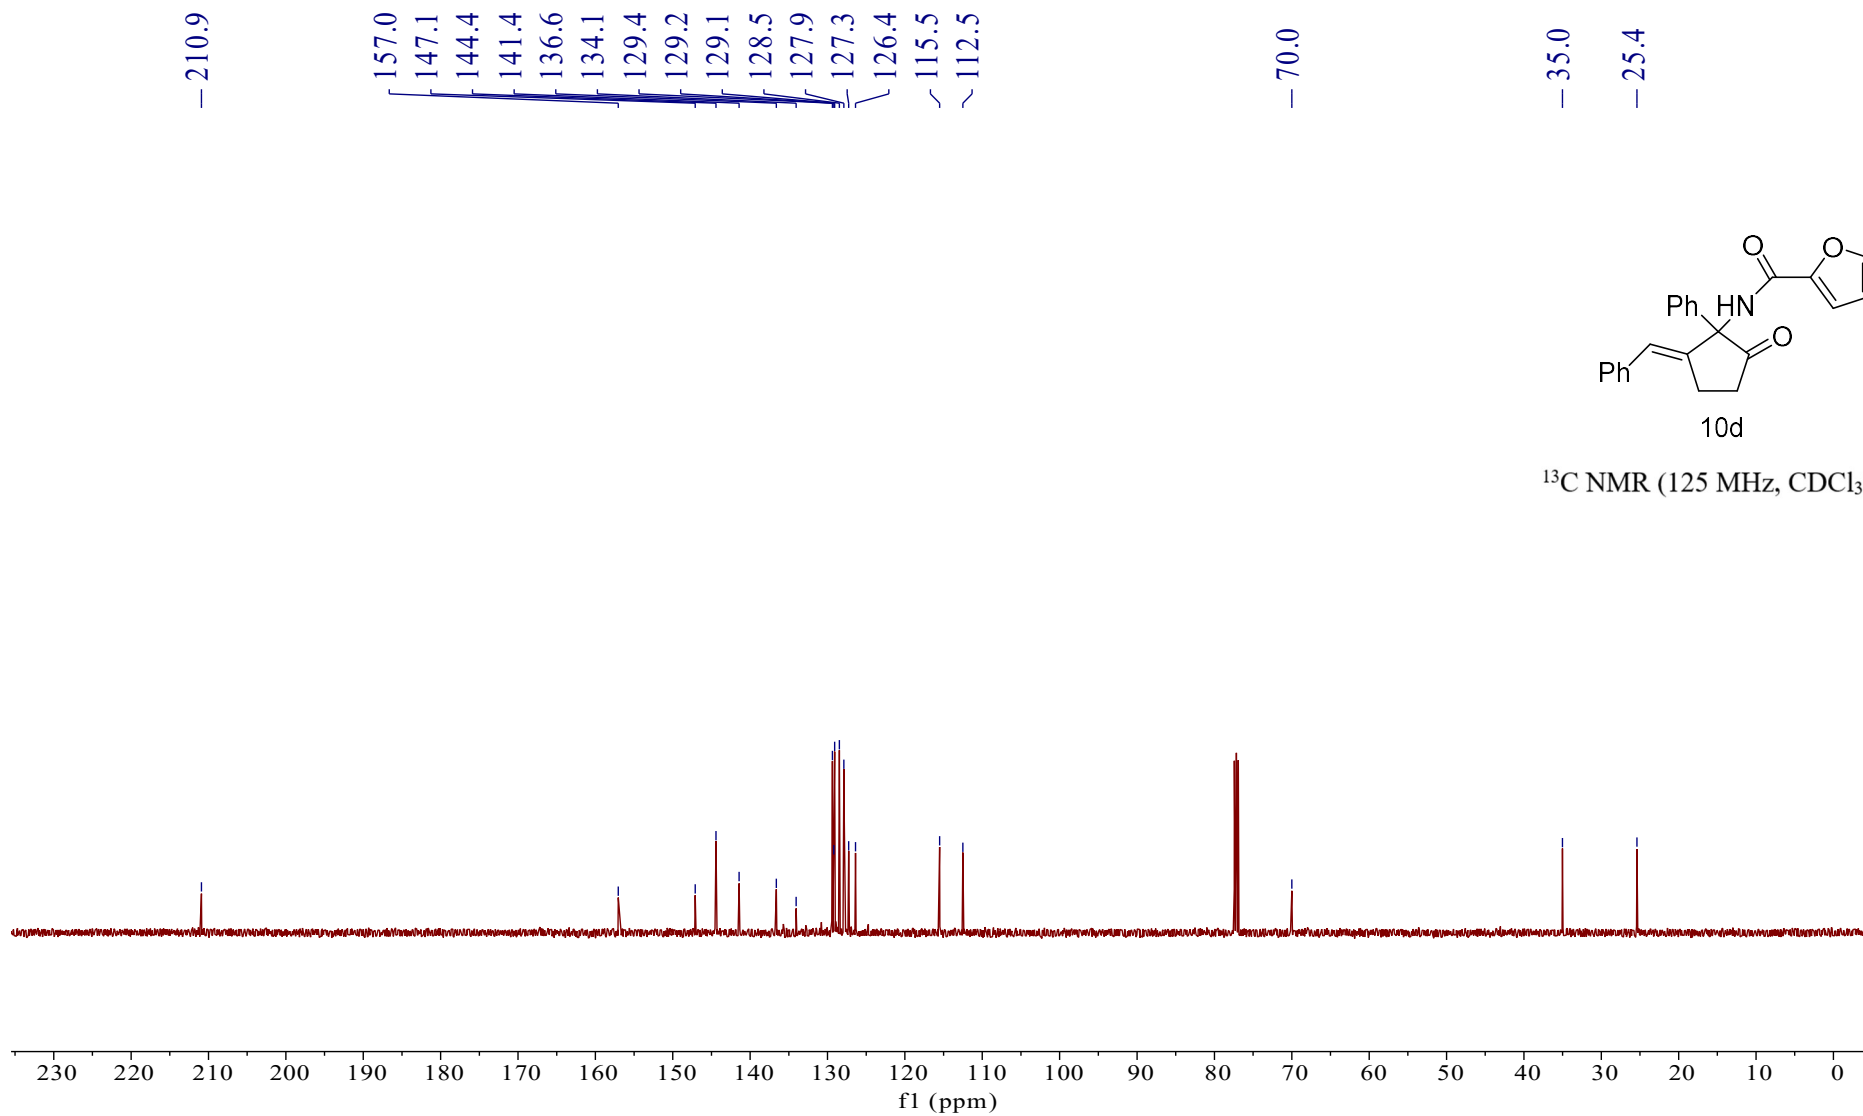

NMR-245

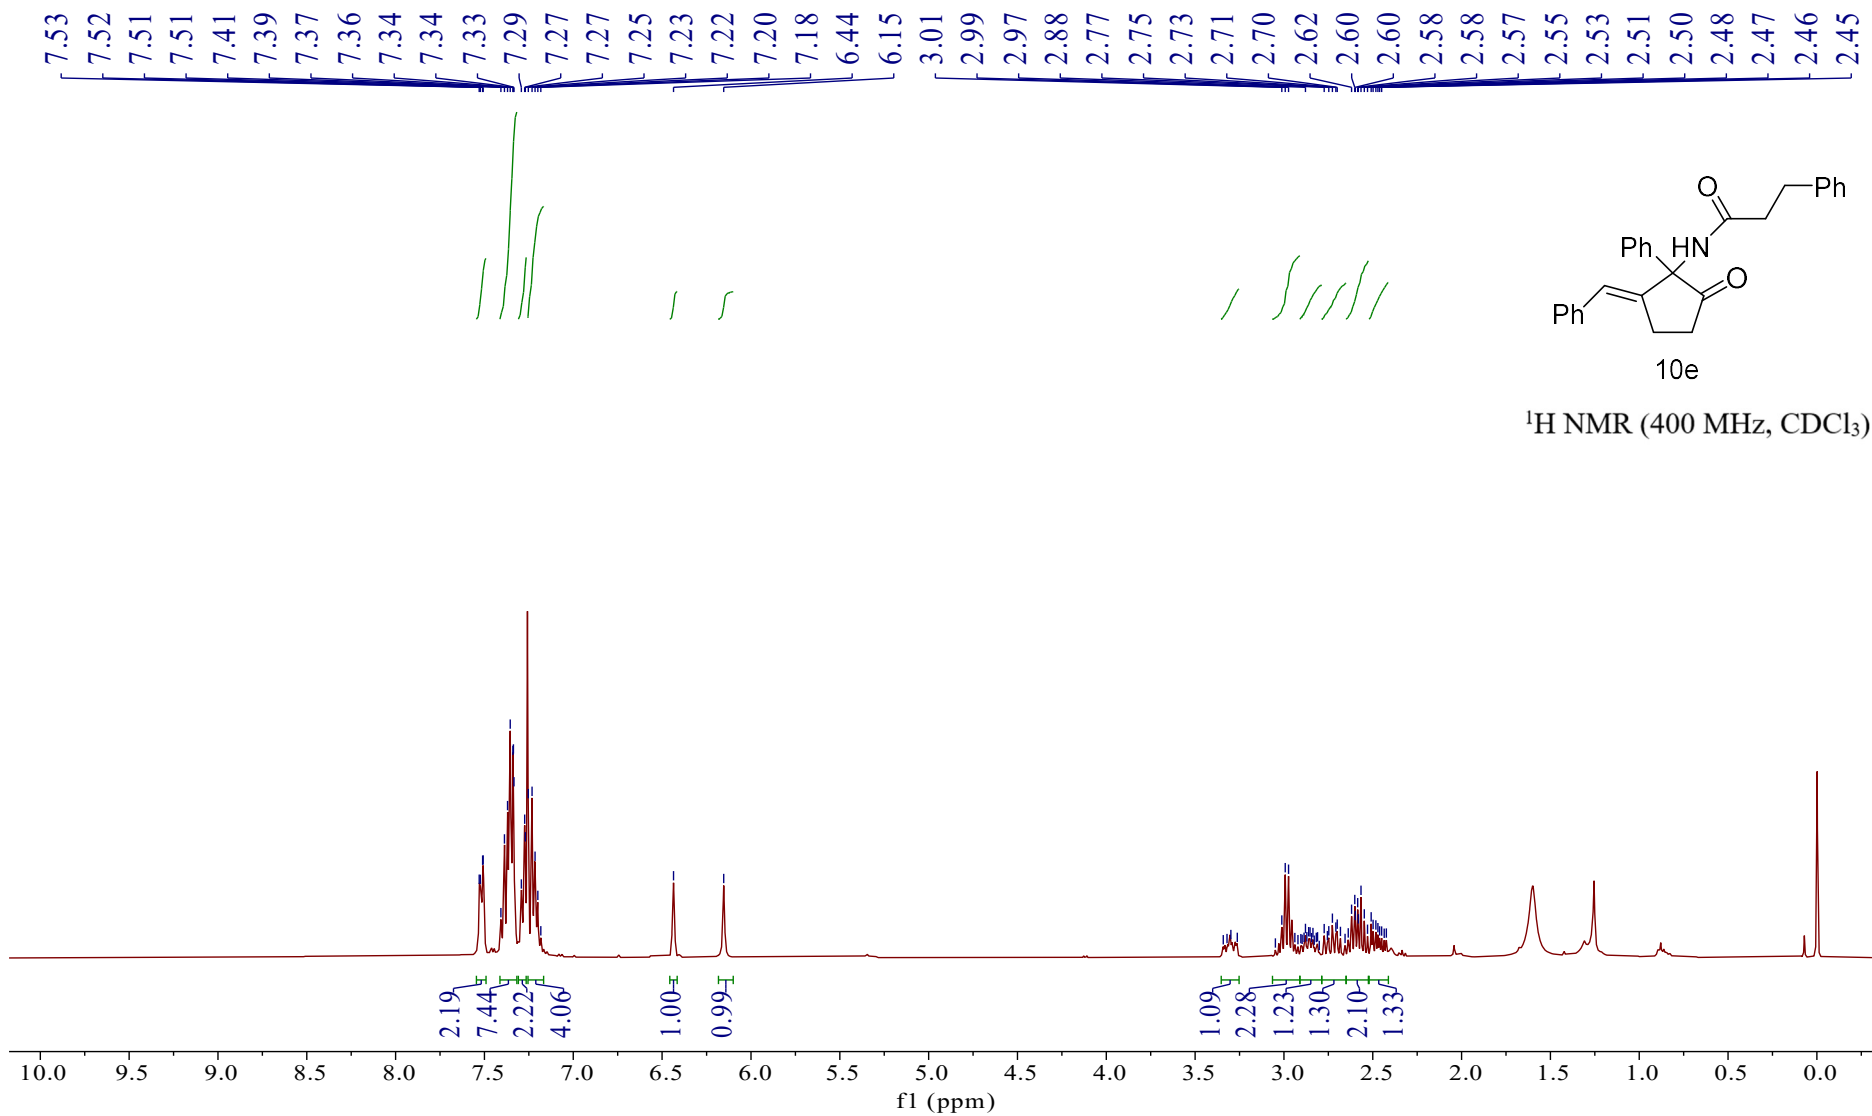

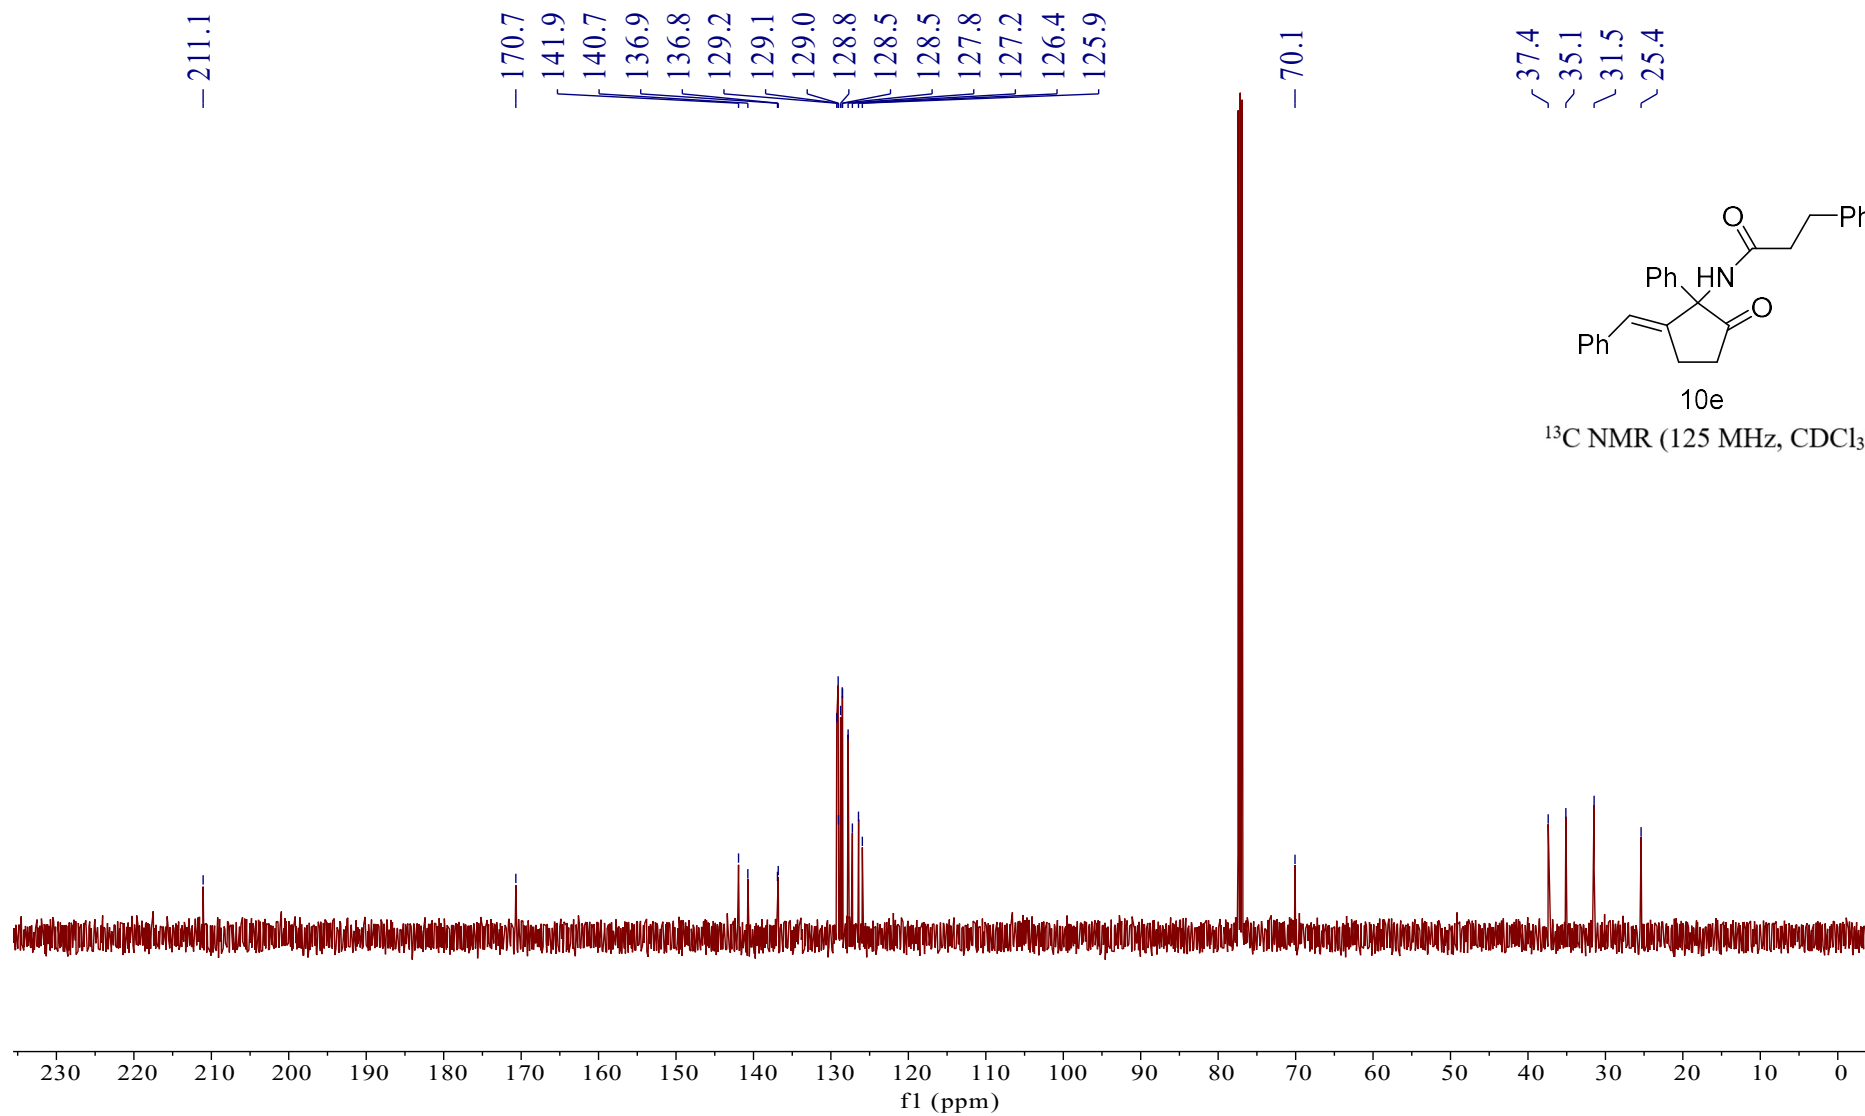

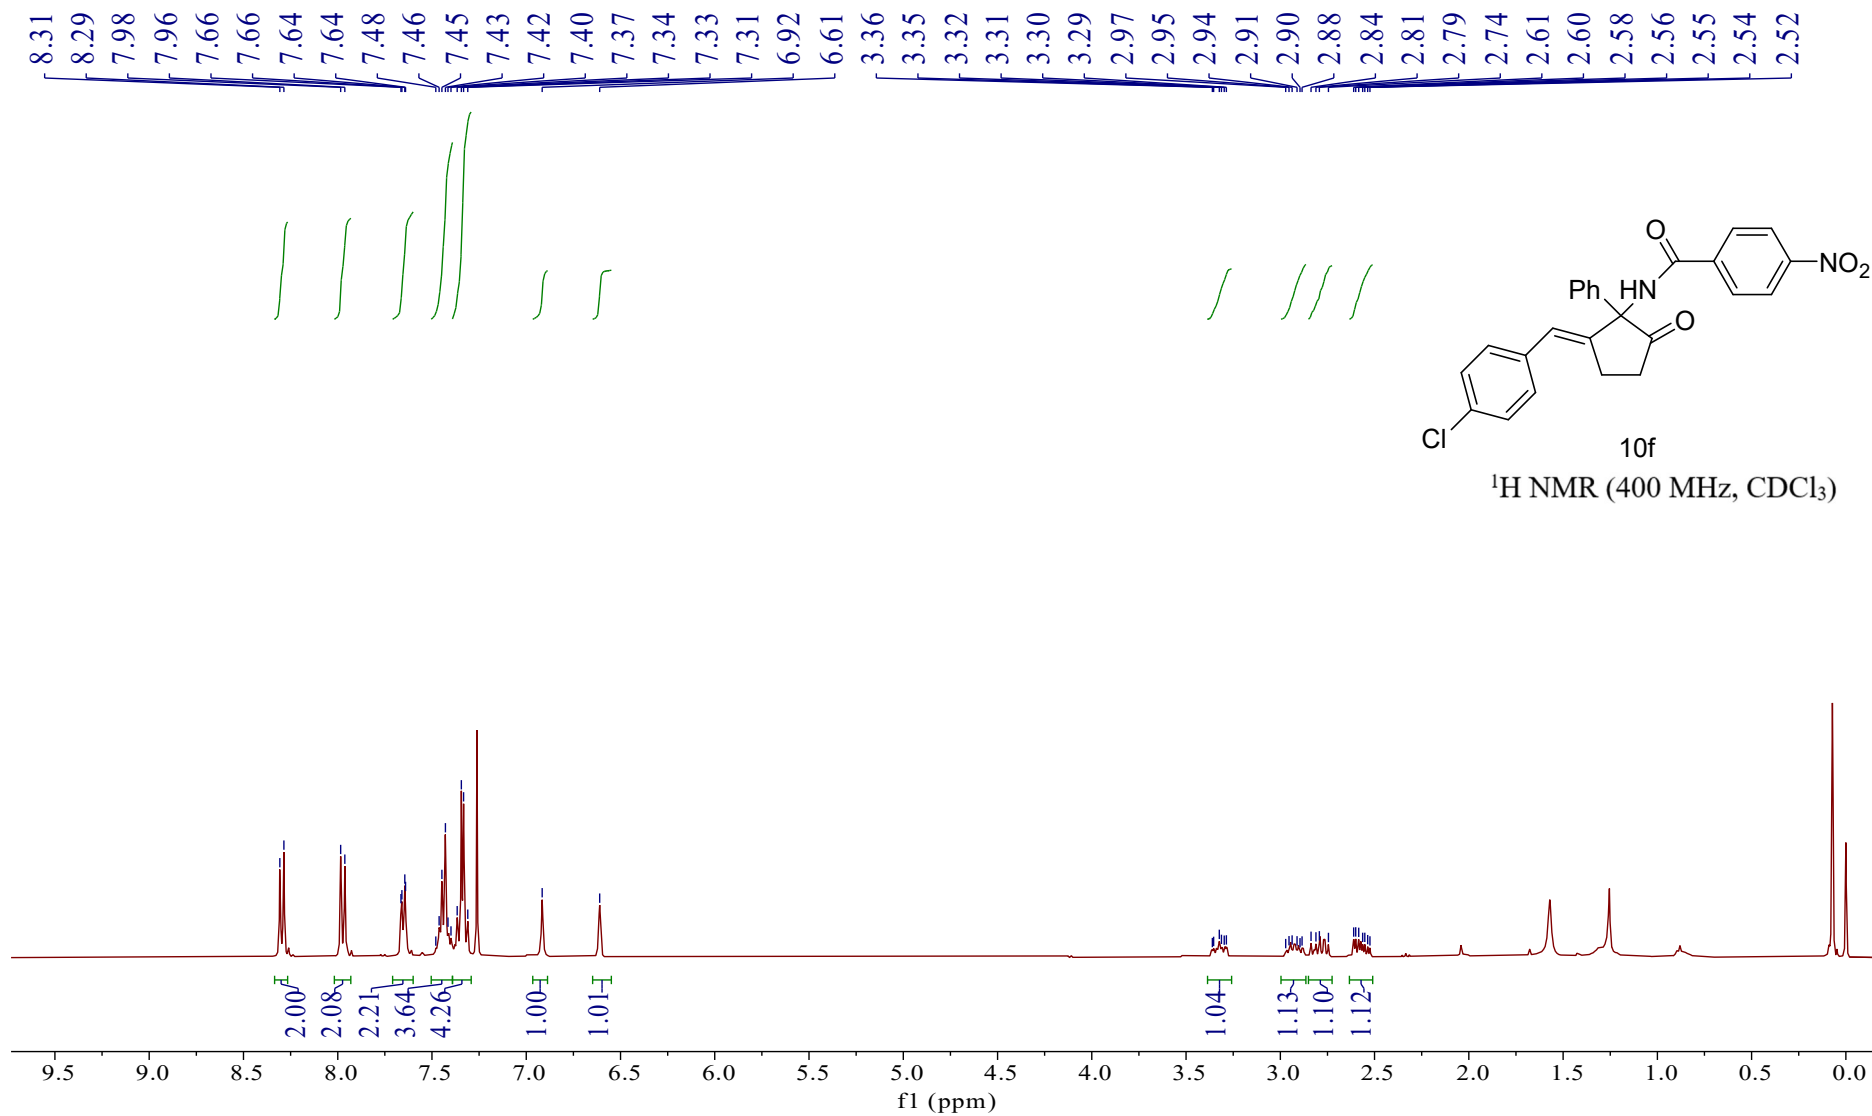

NMR-248

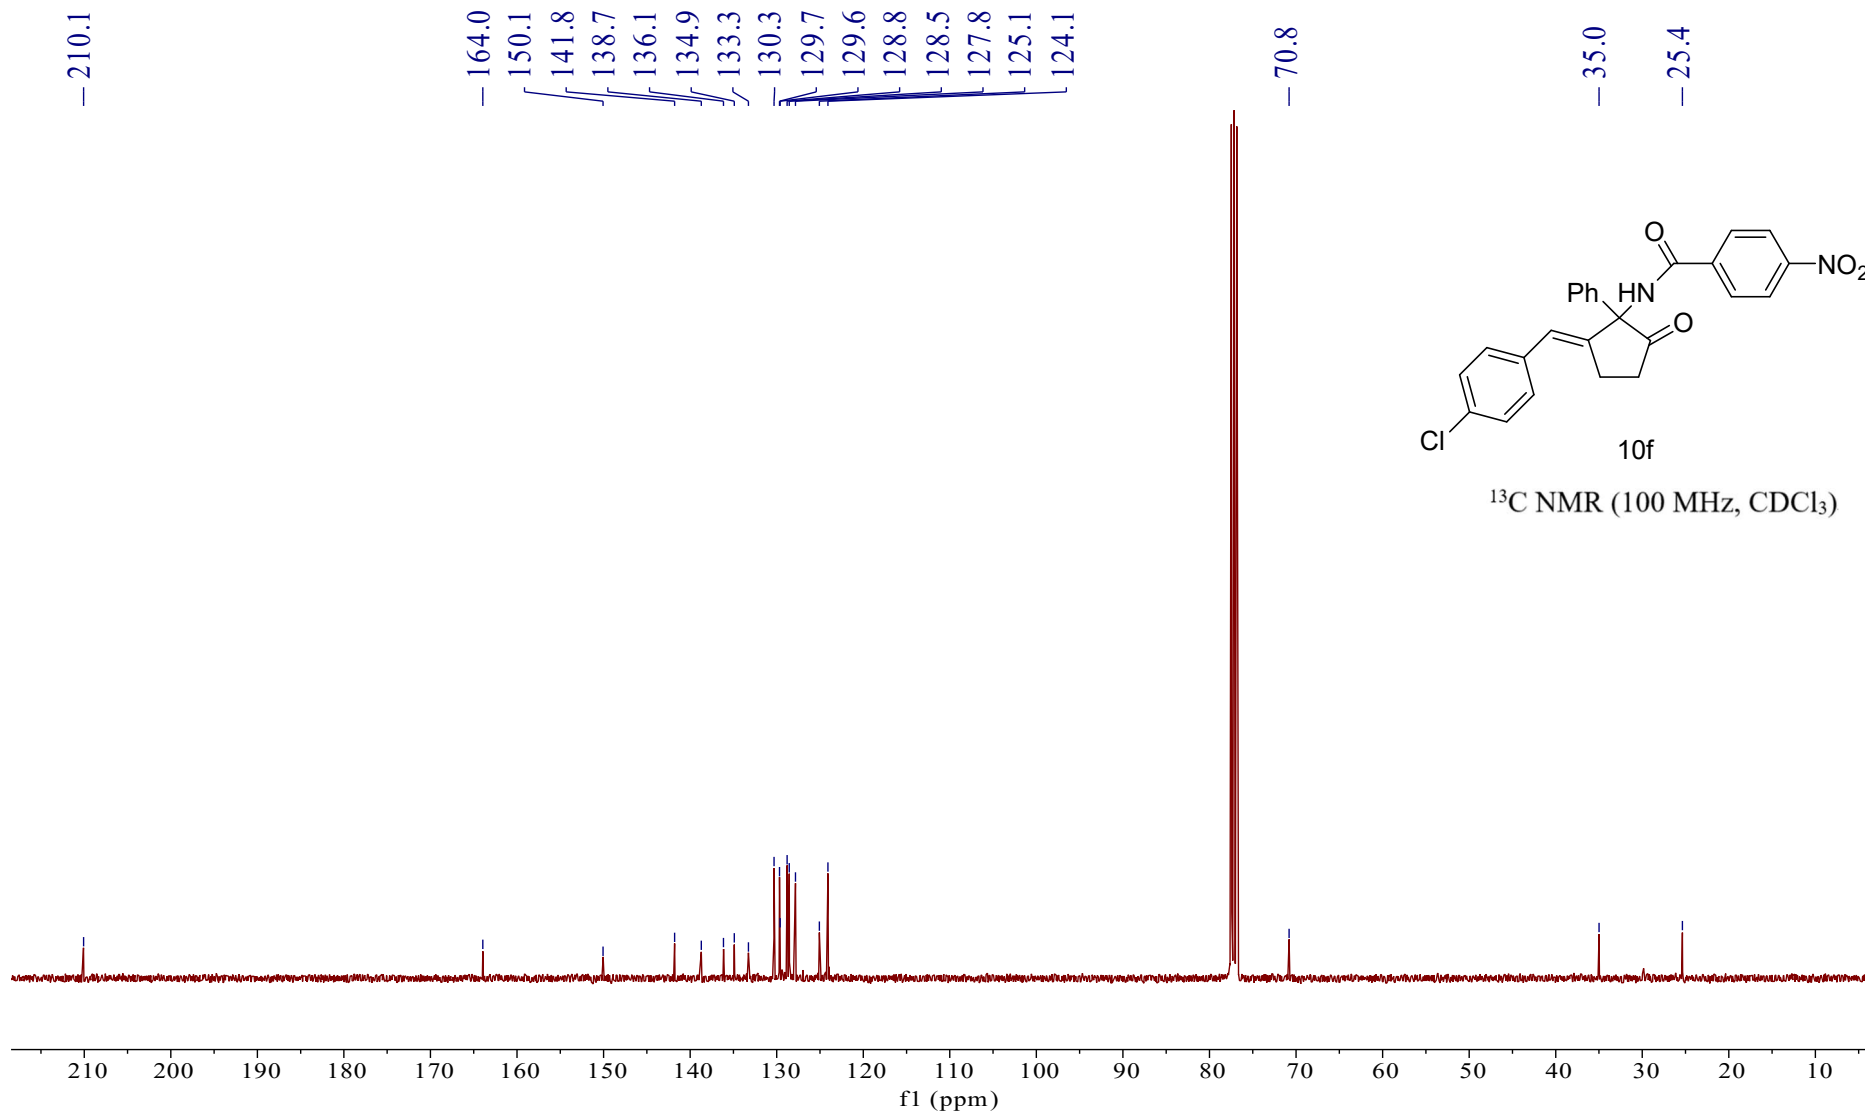

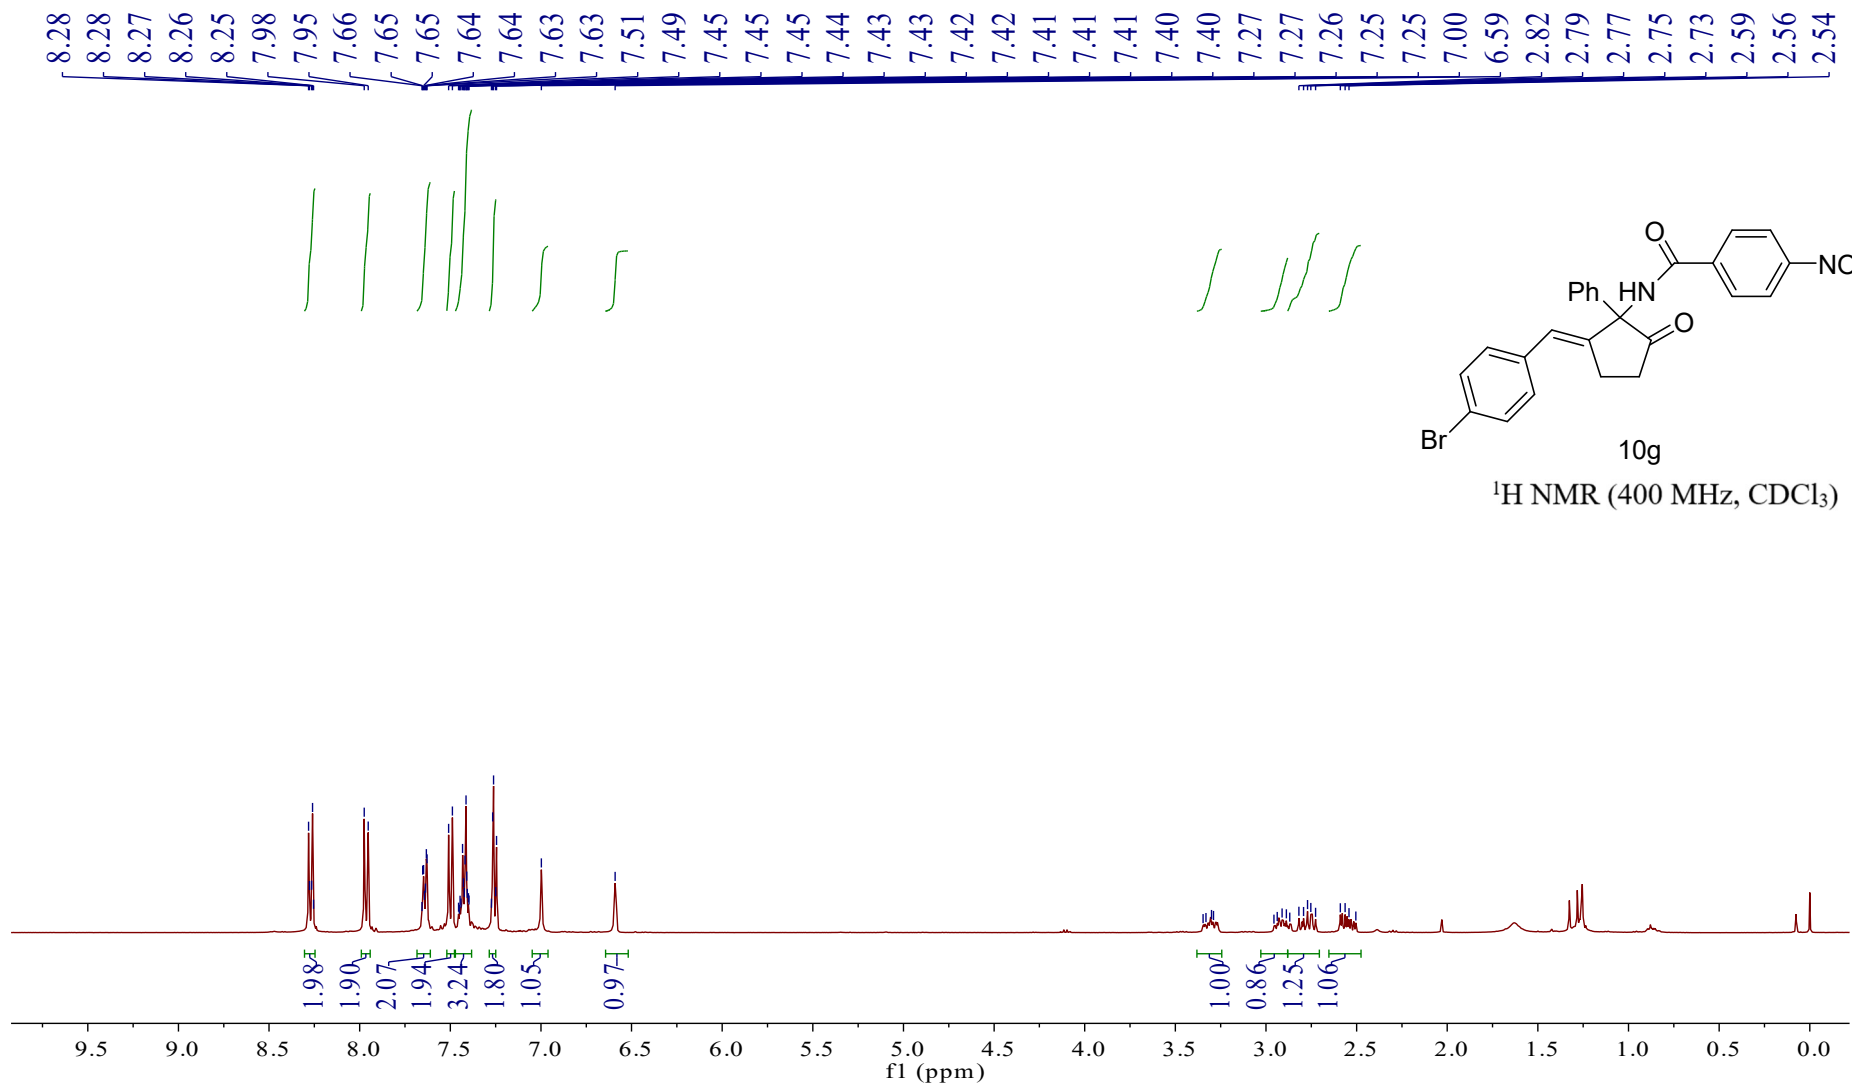

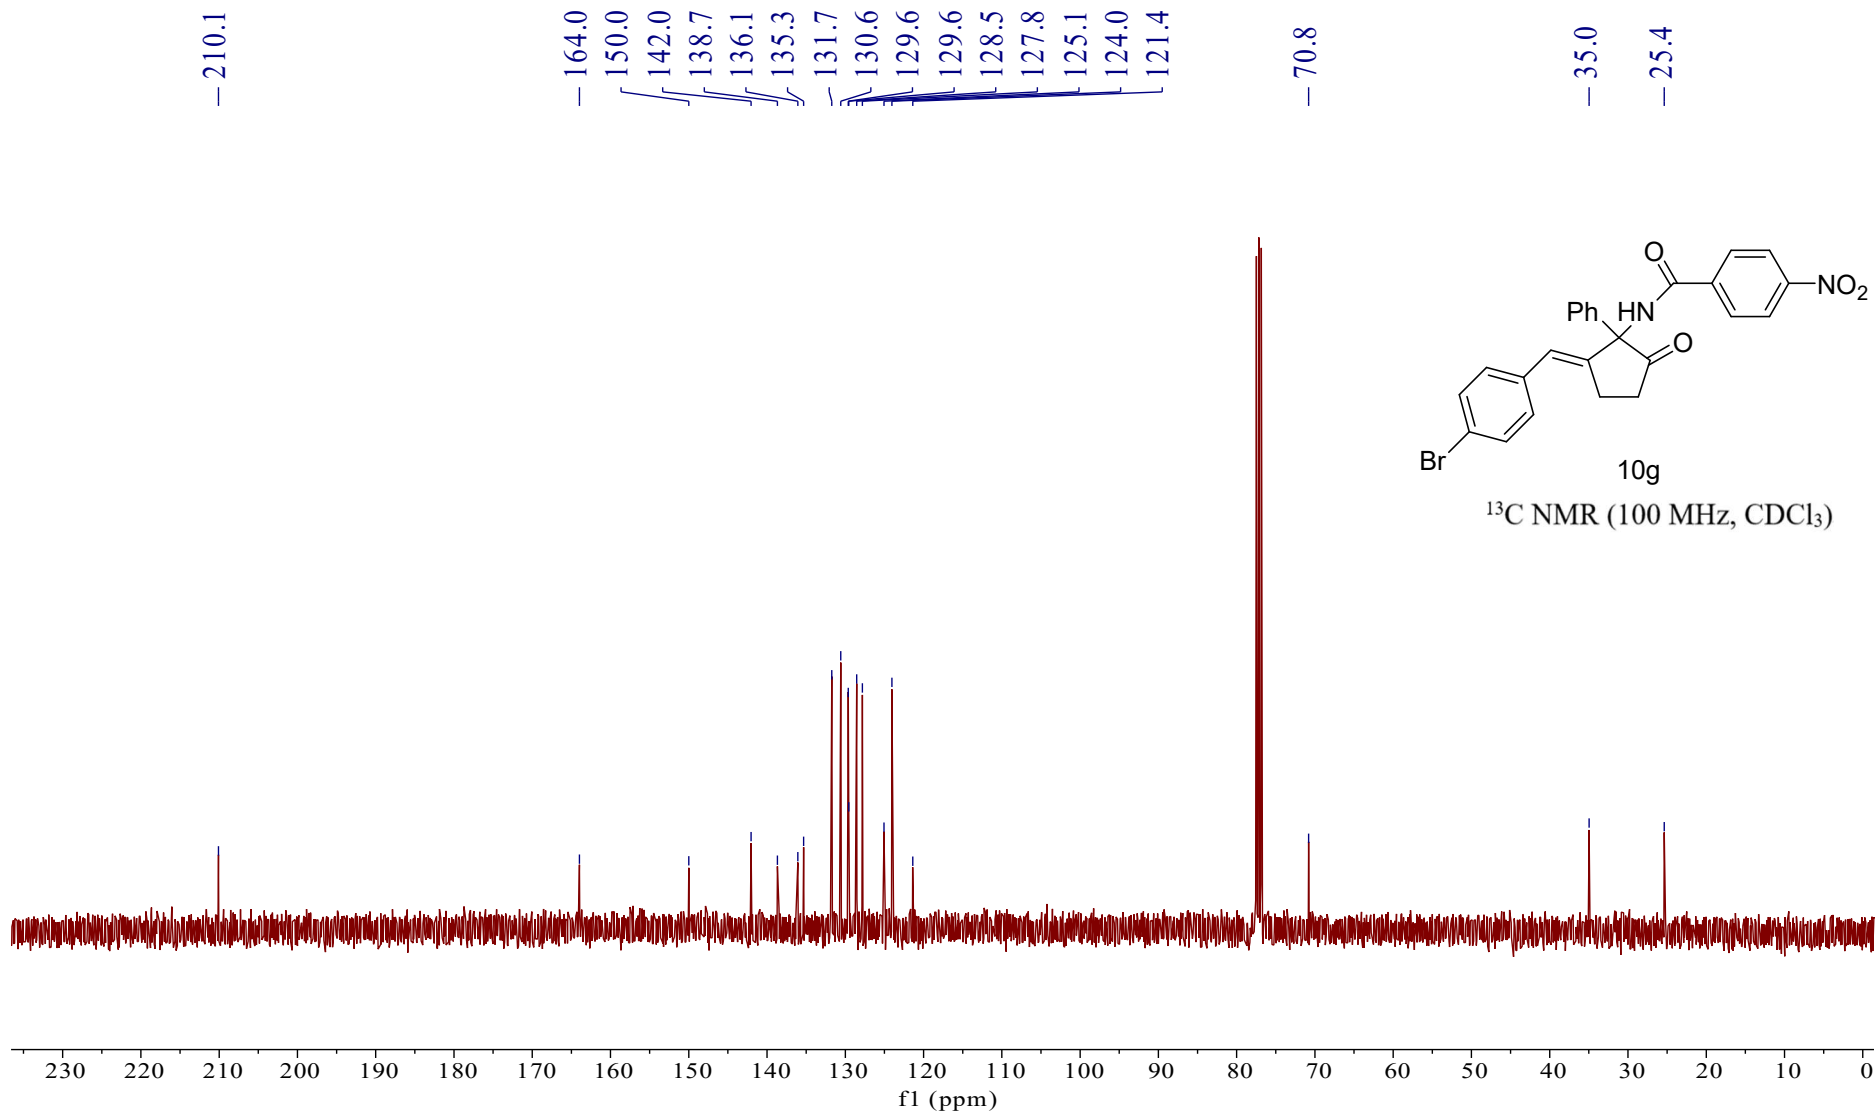

NMR-251

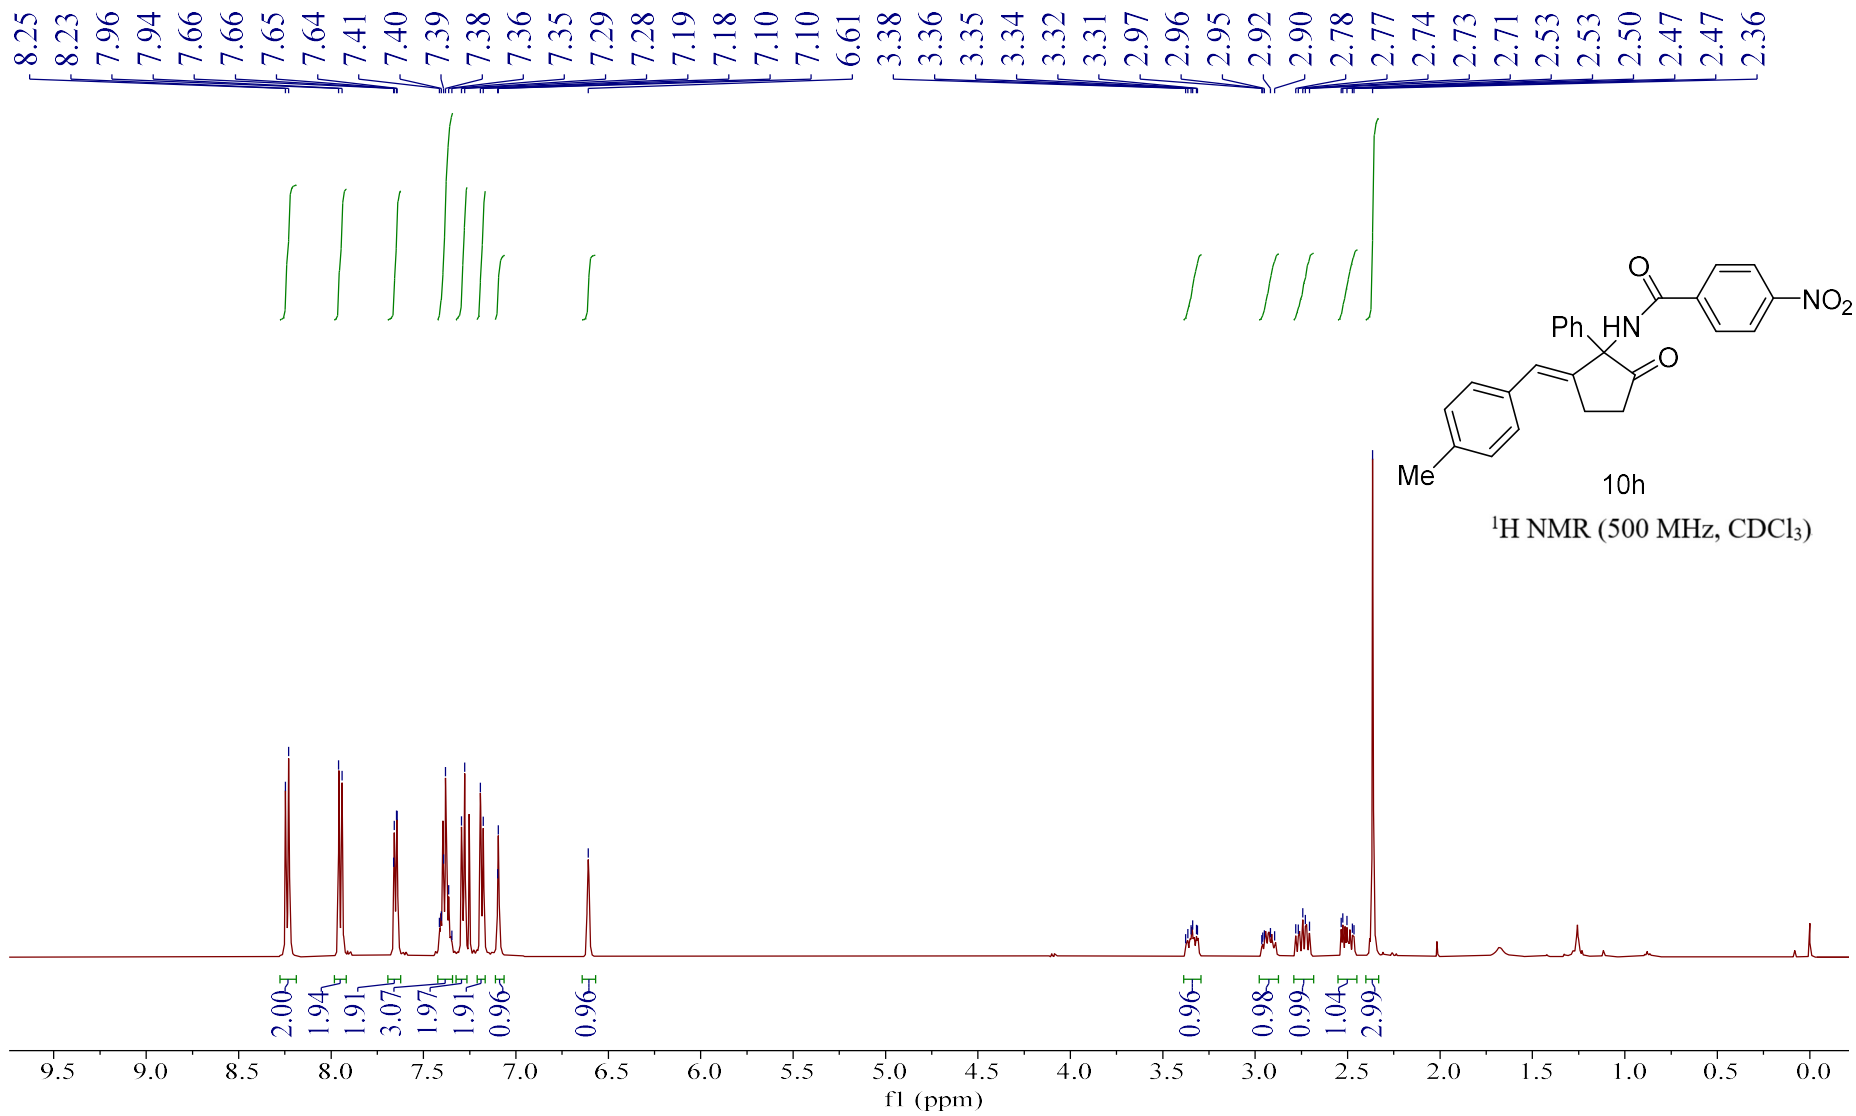



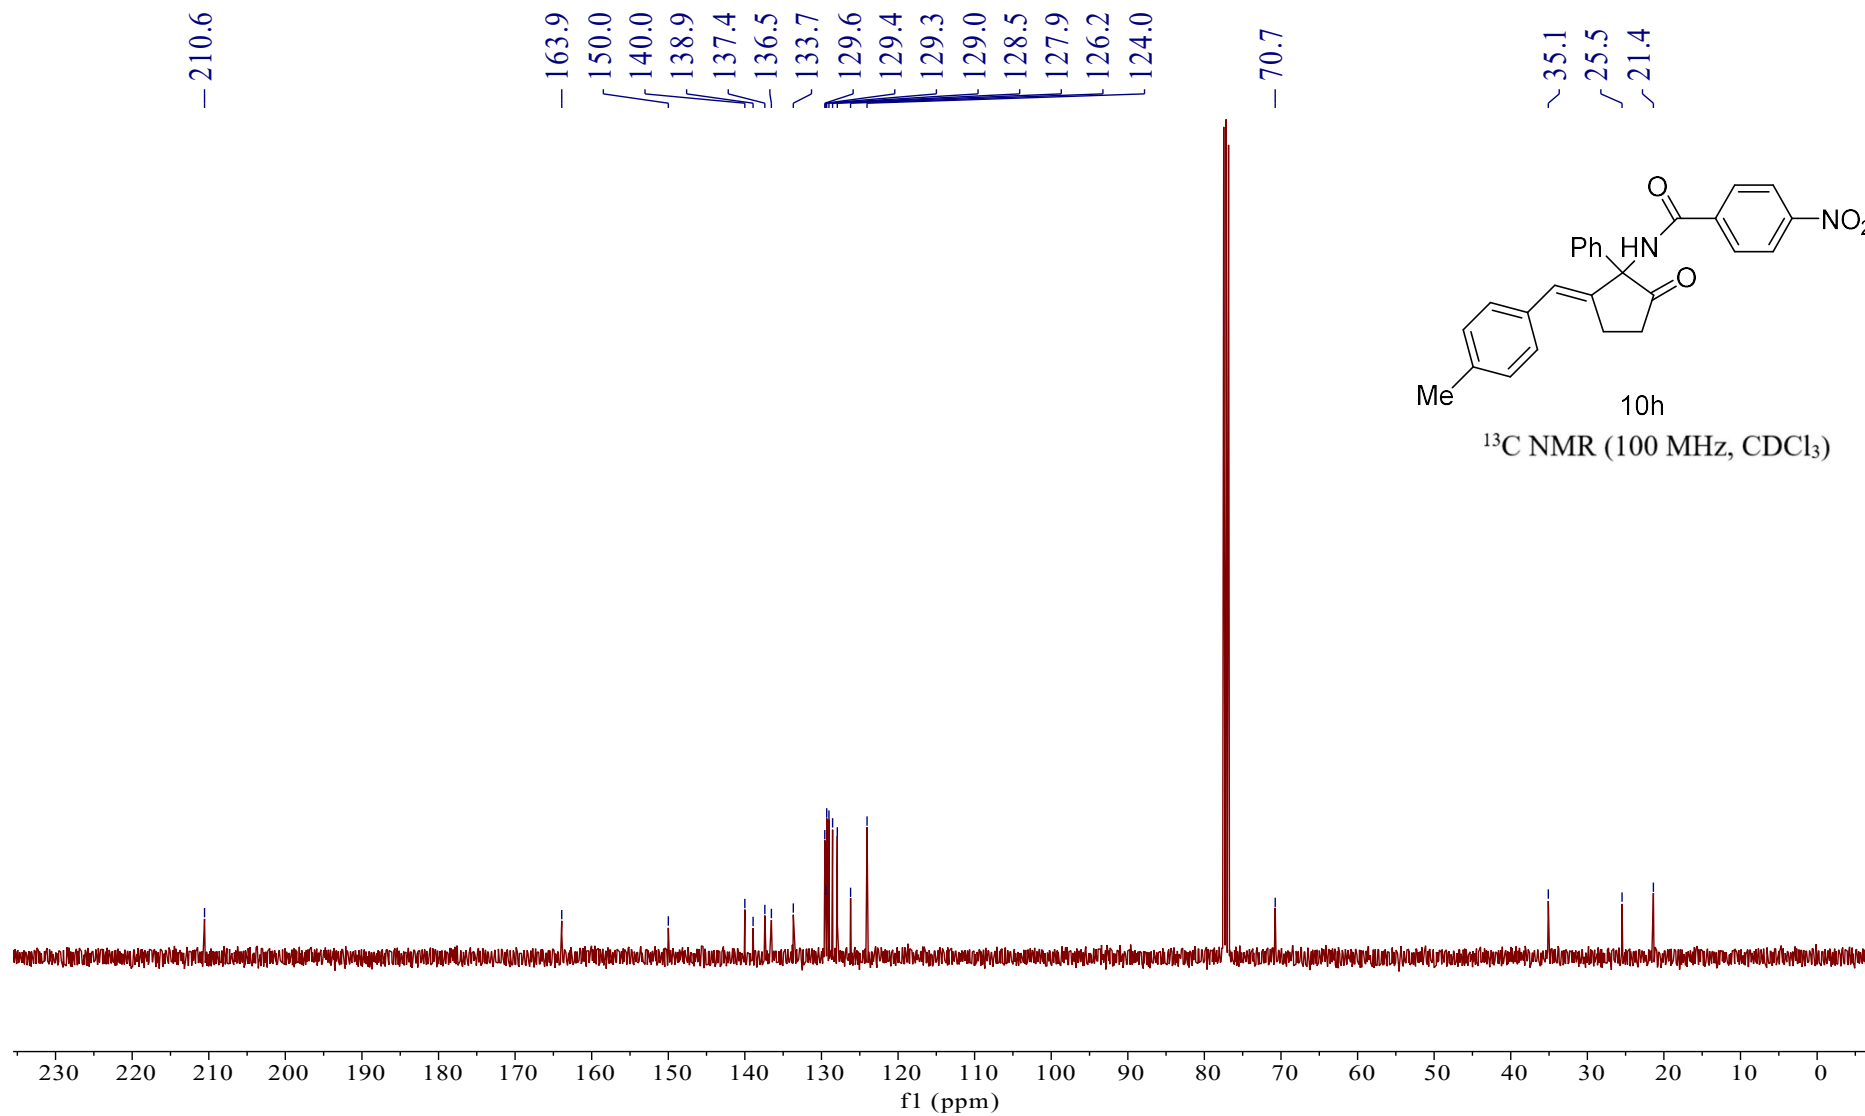

NMR-253

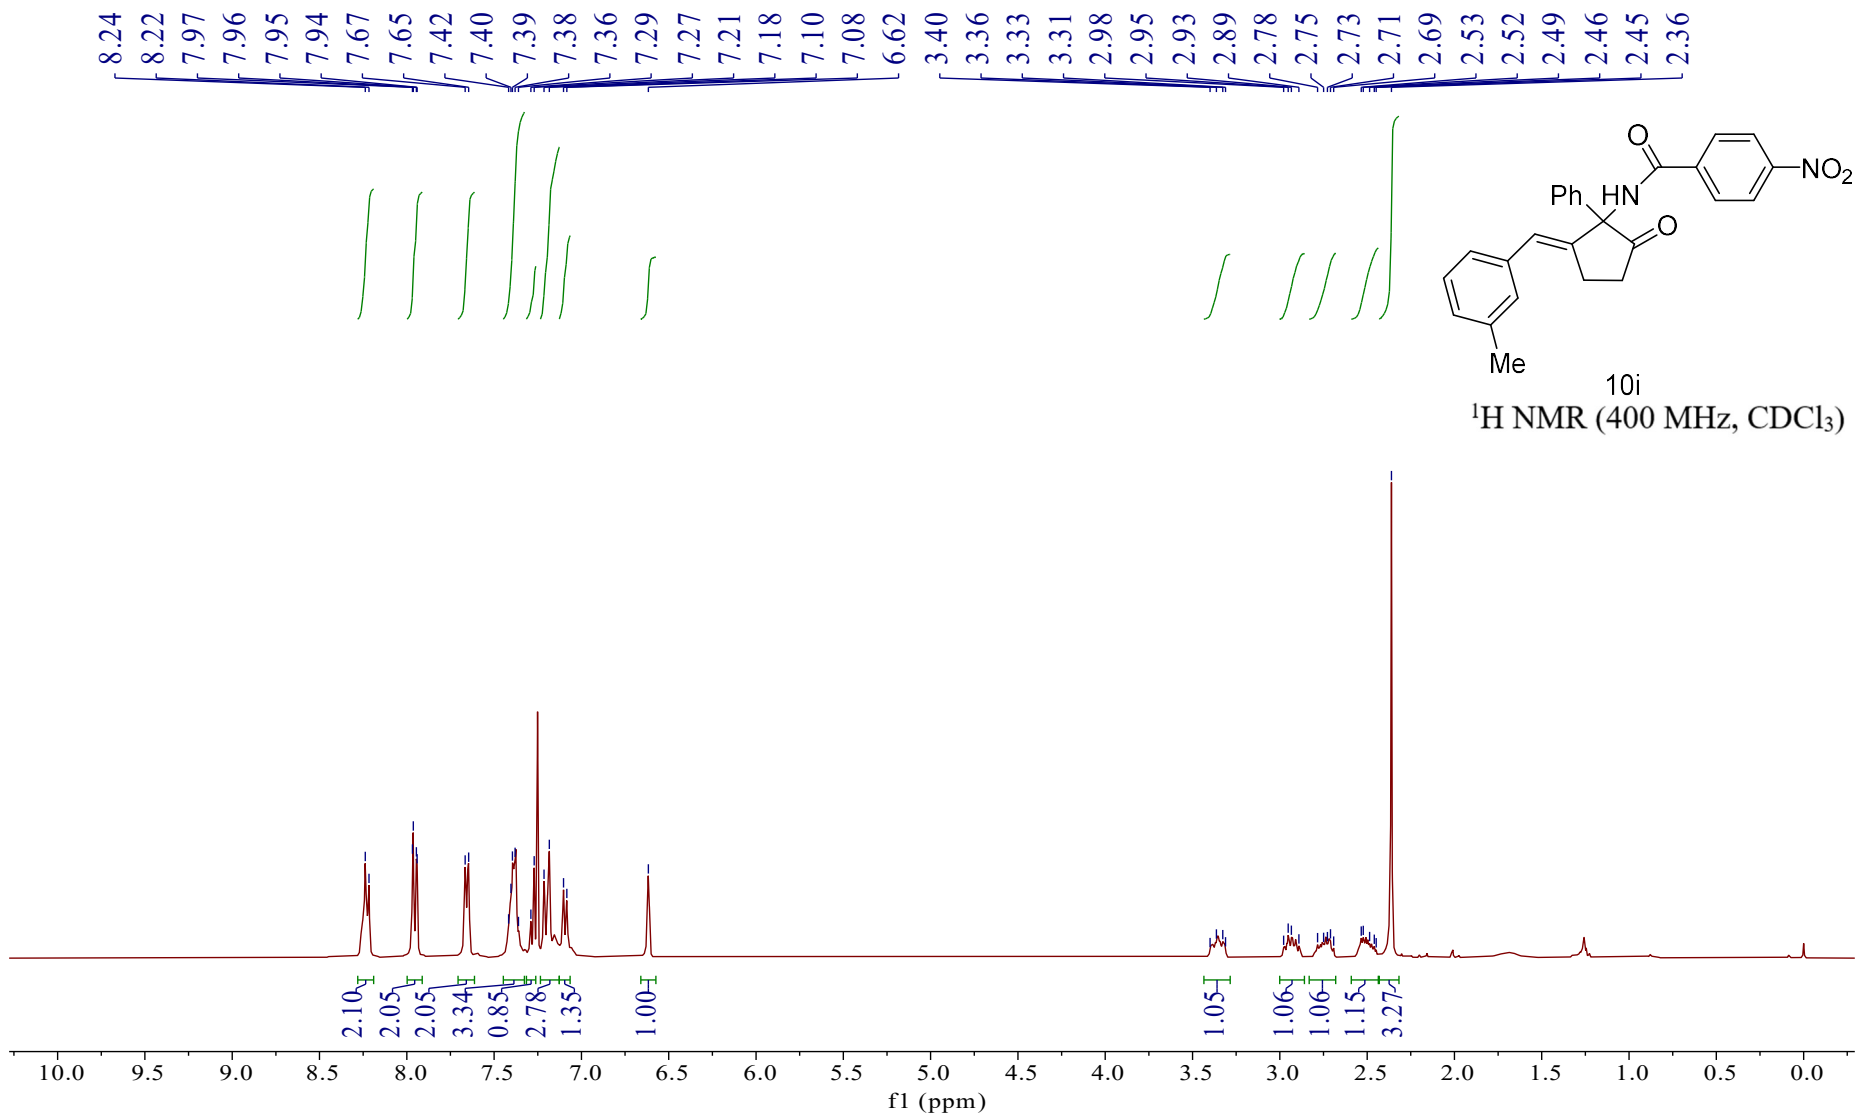

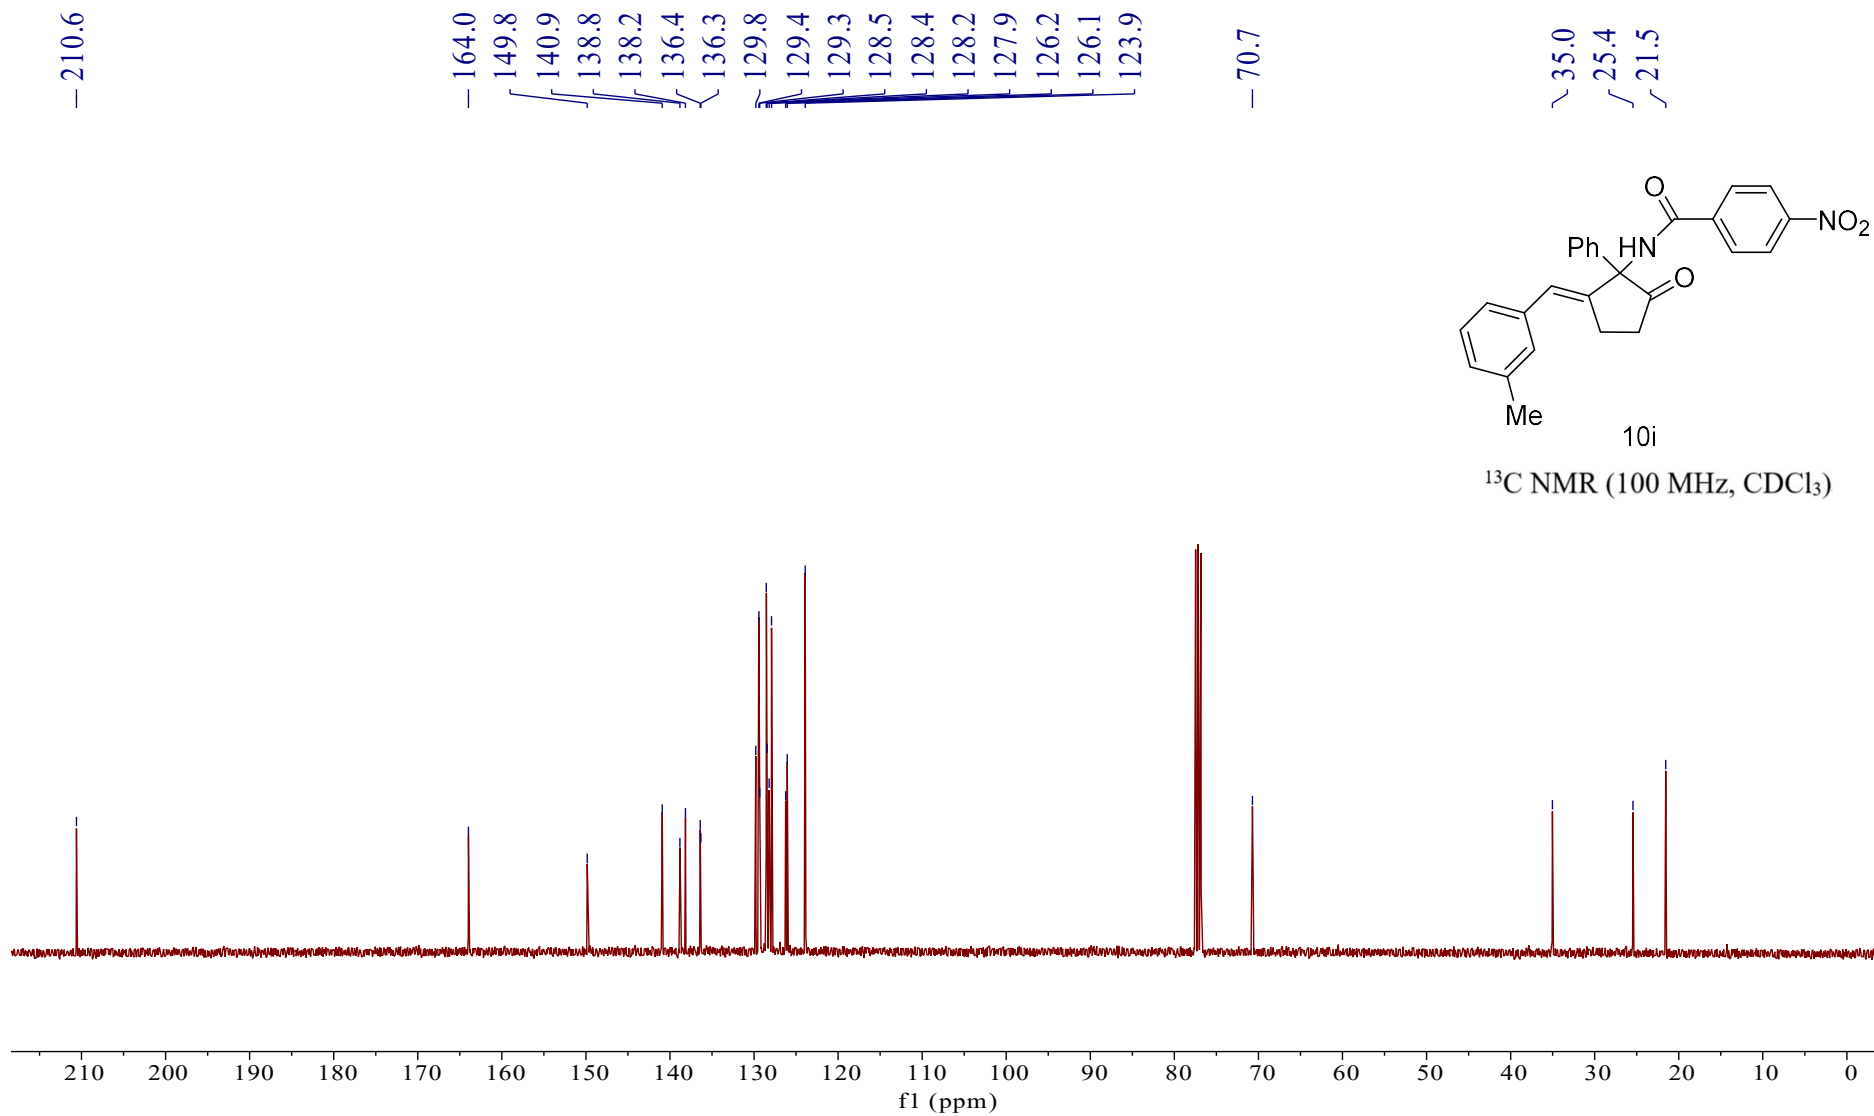

NMR-255

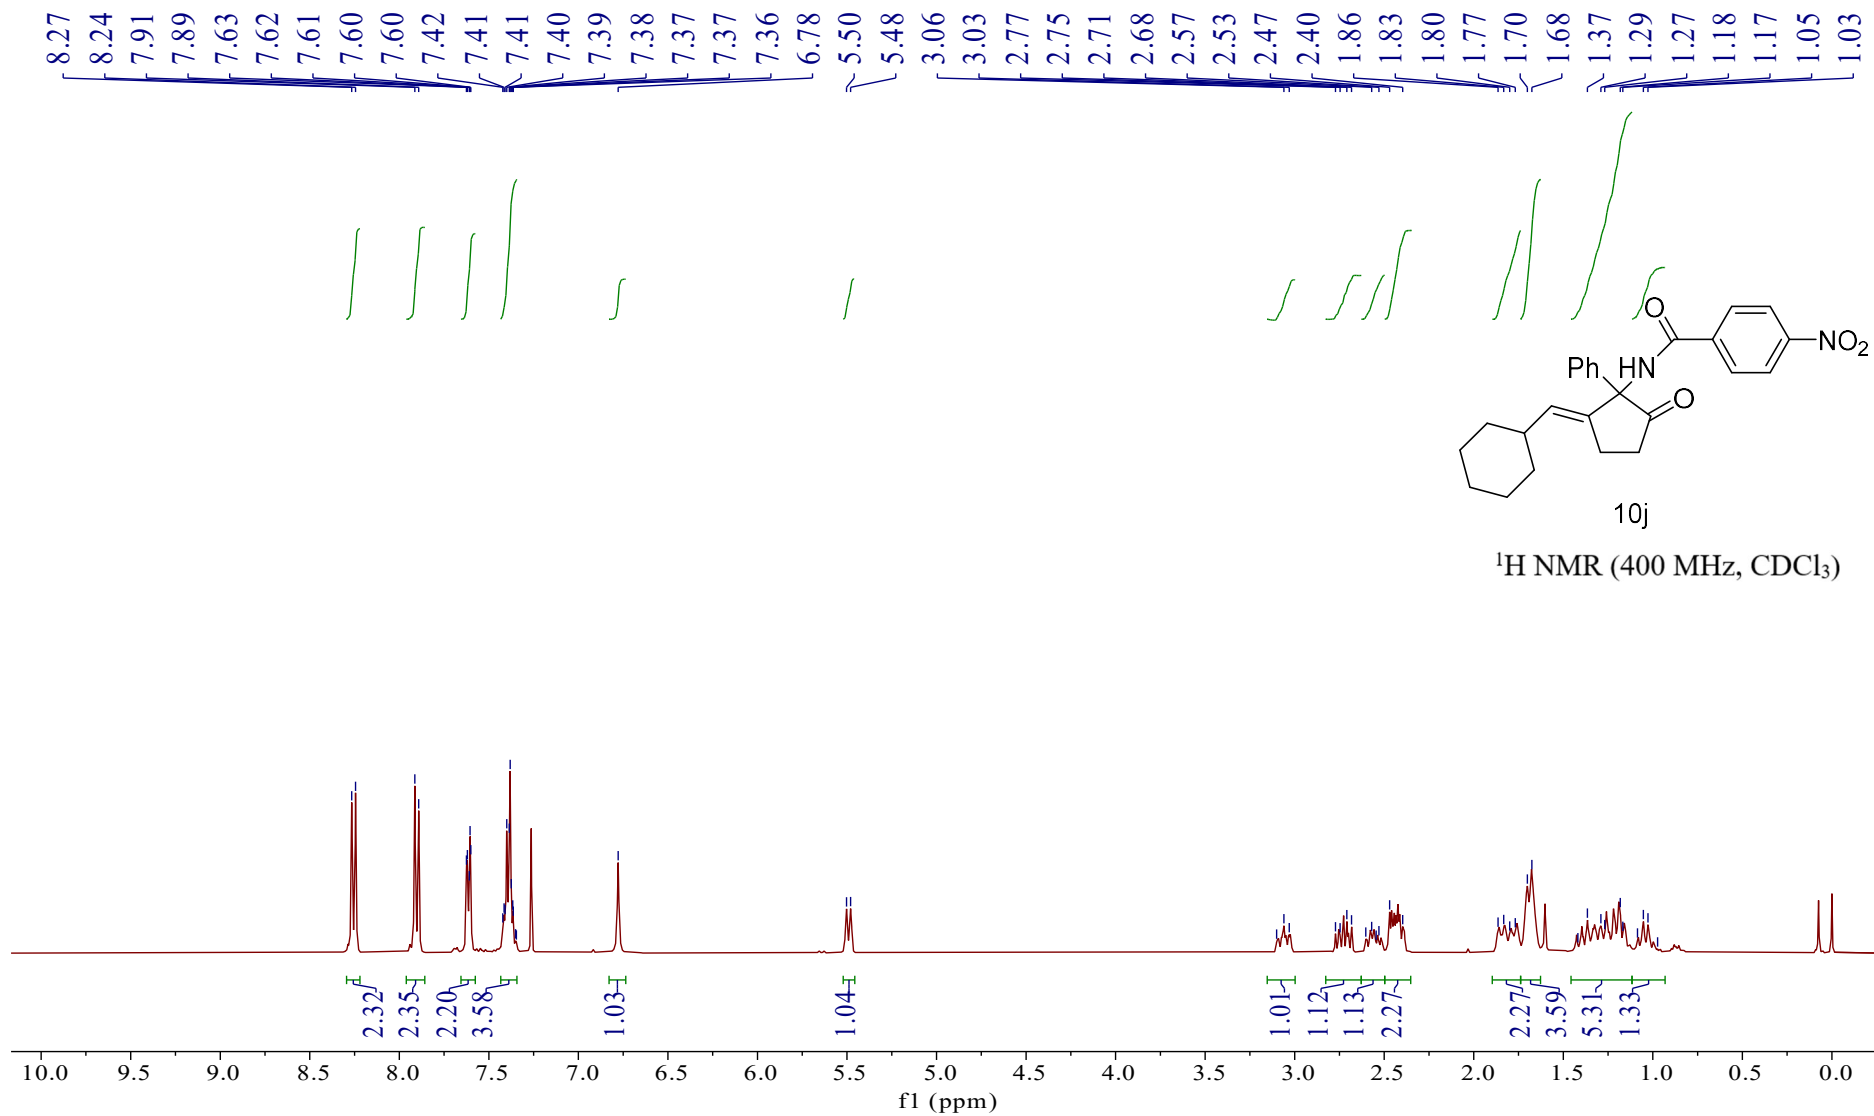

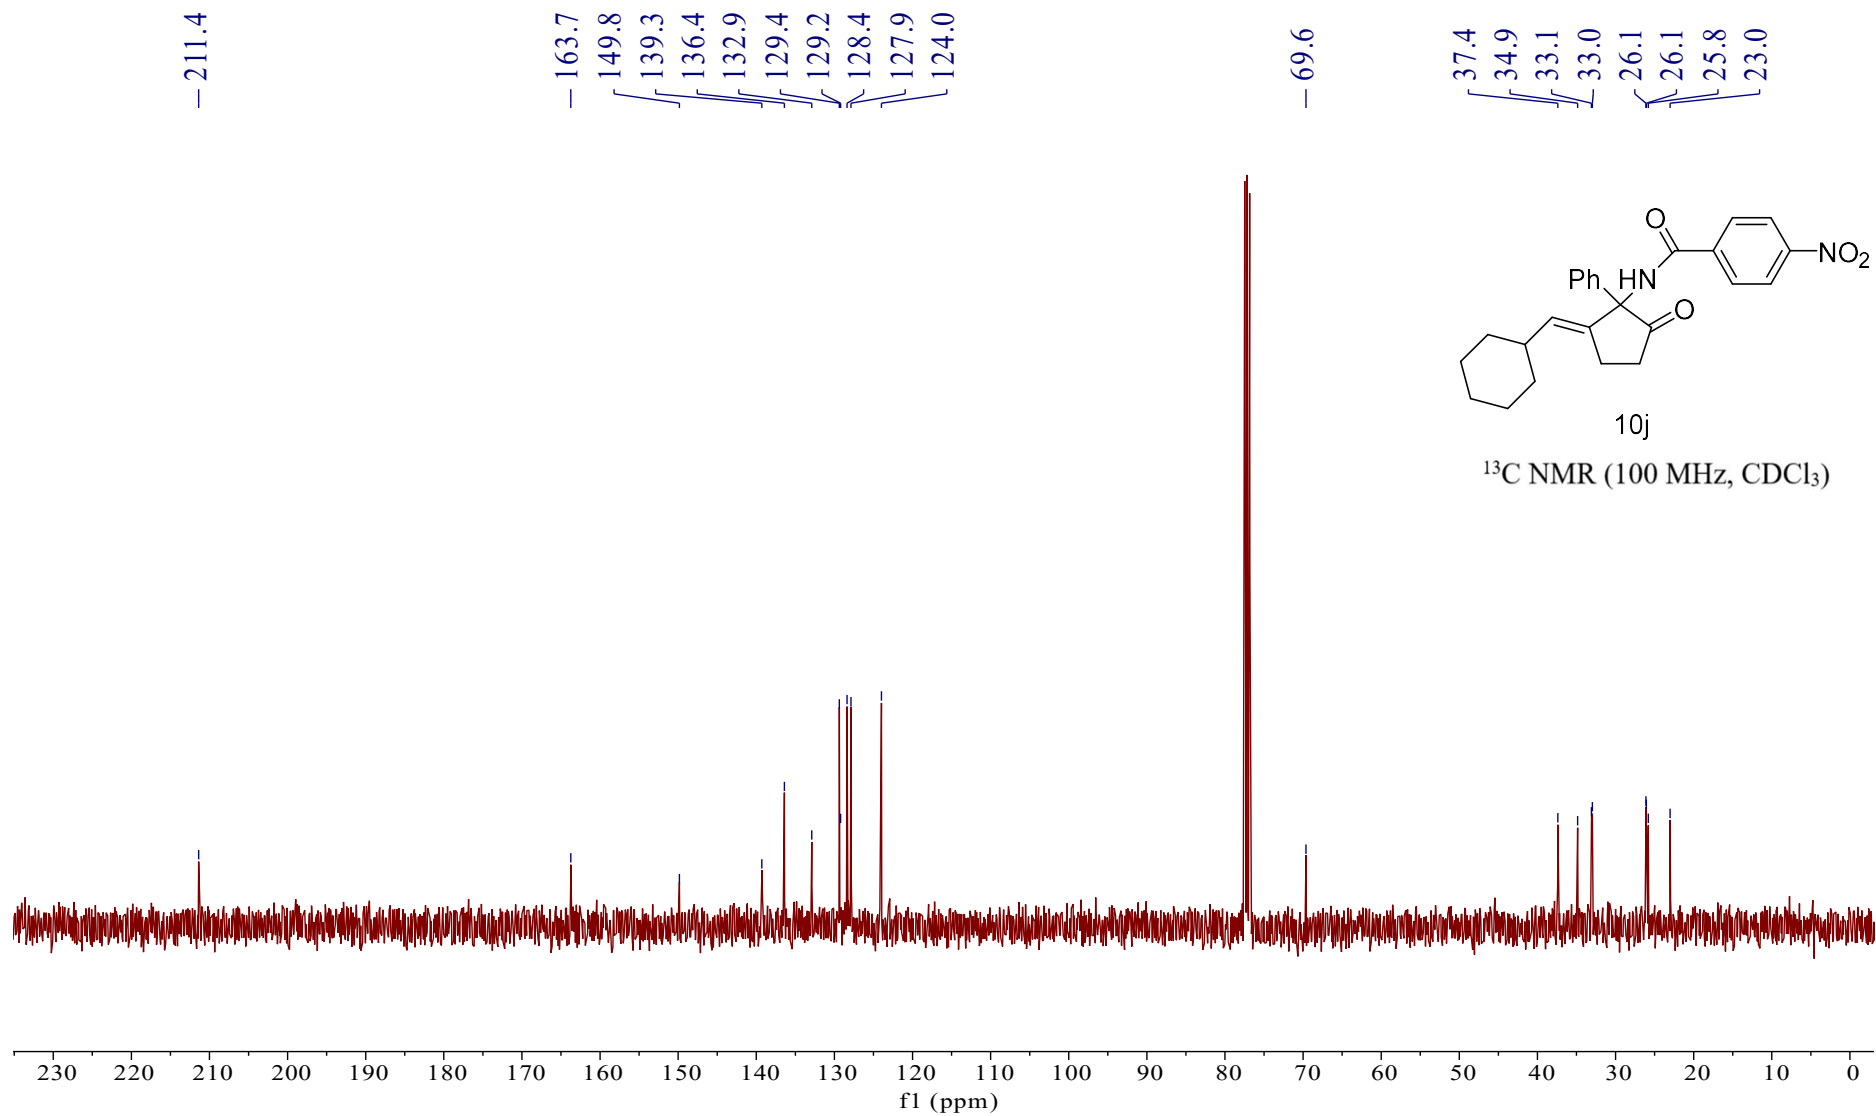

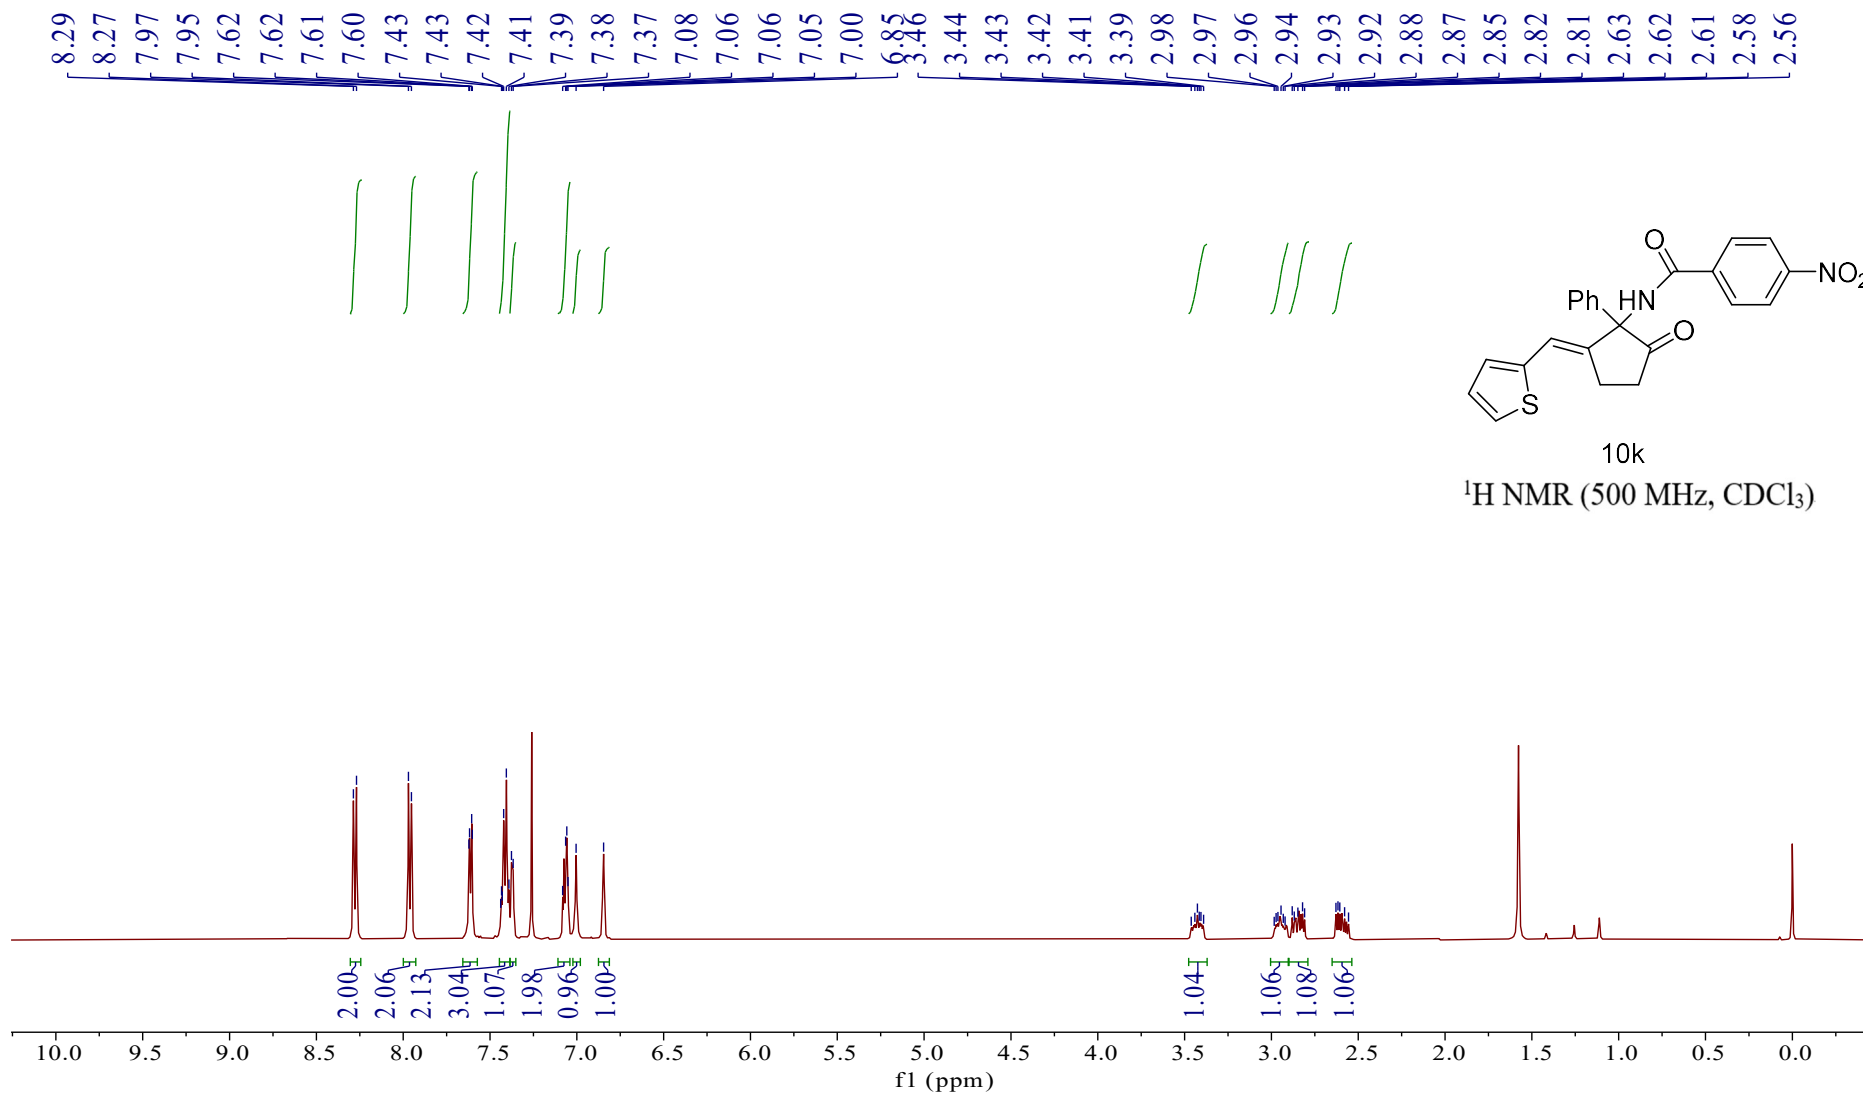

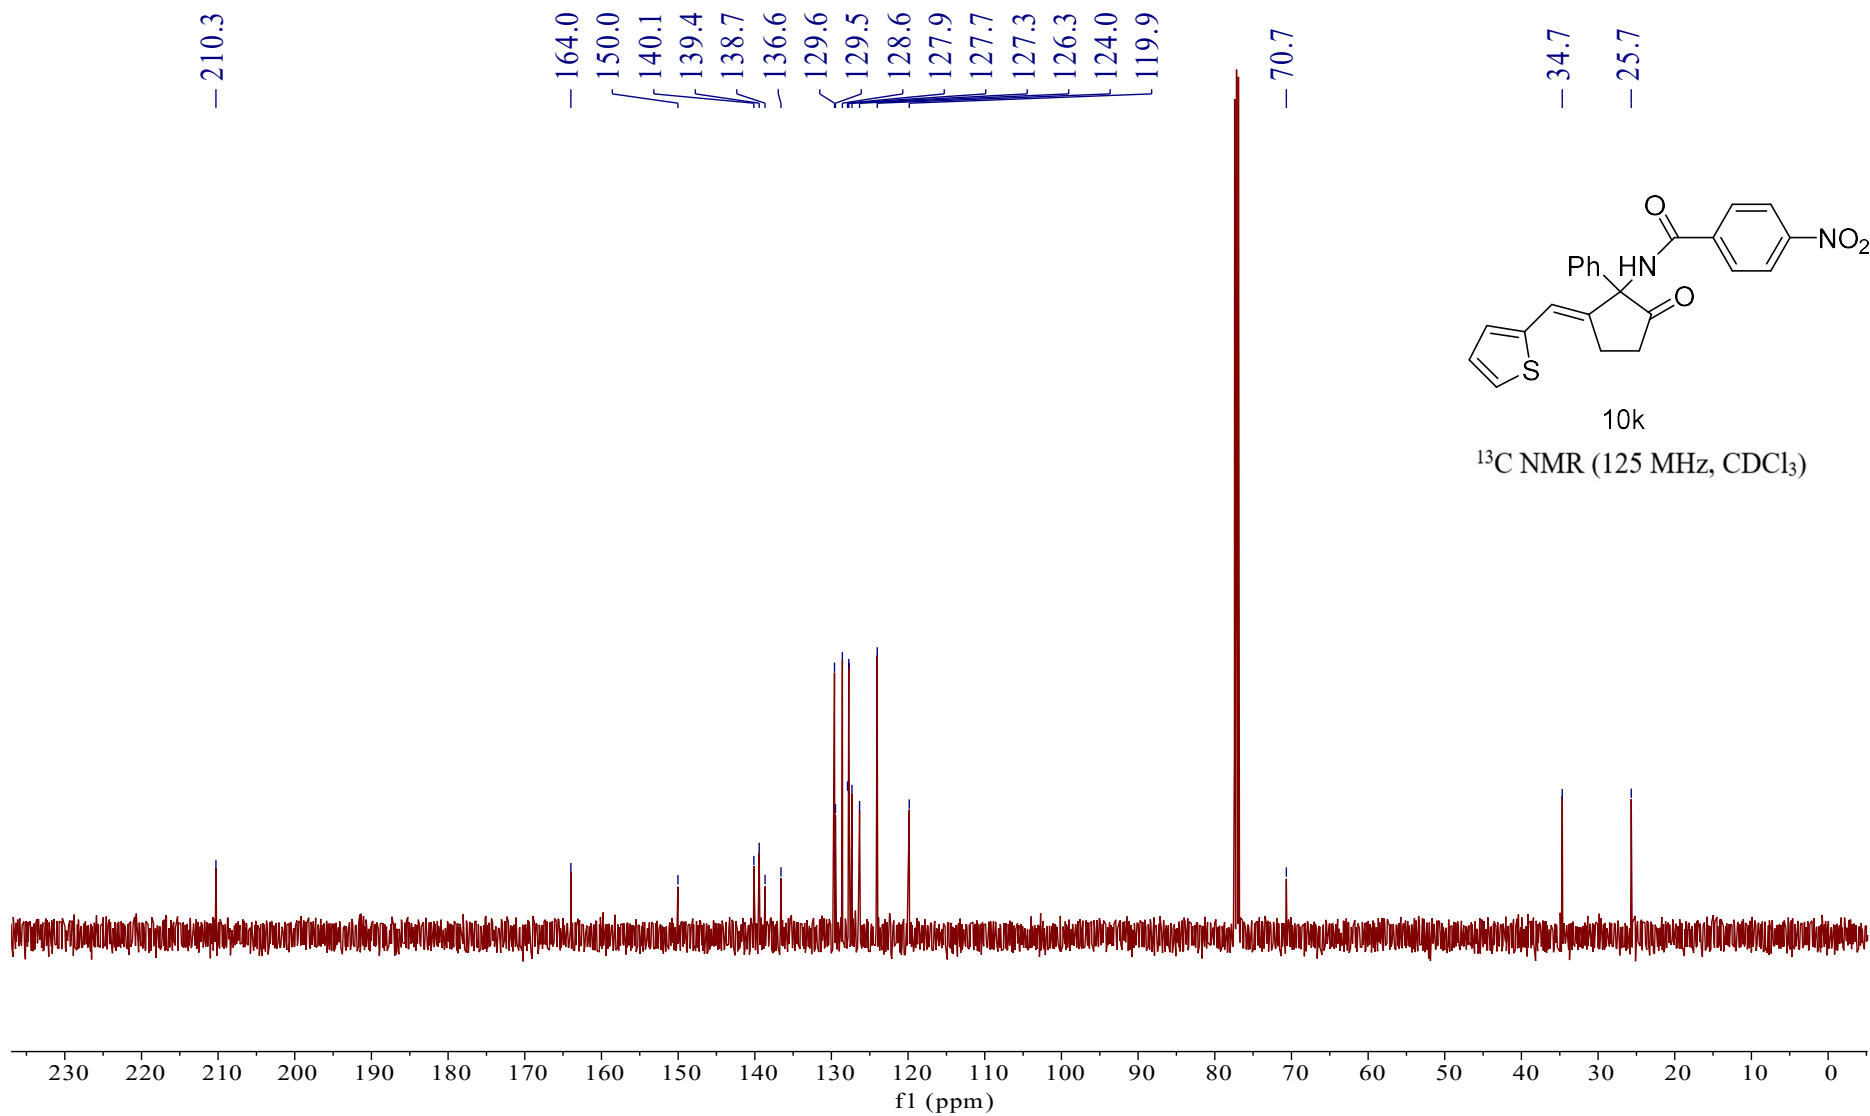

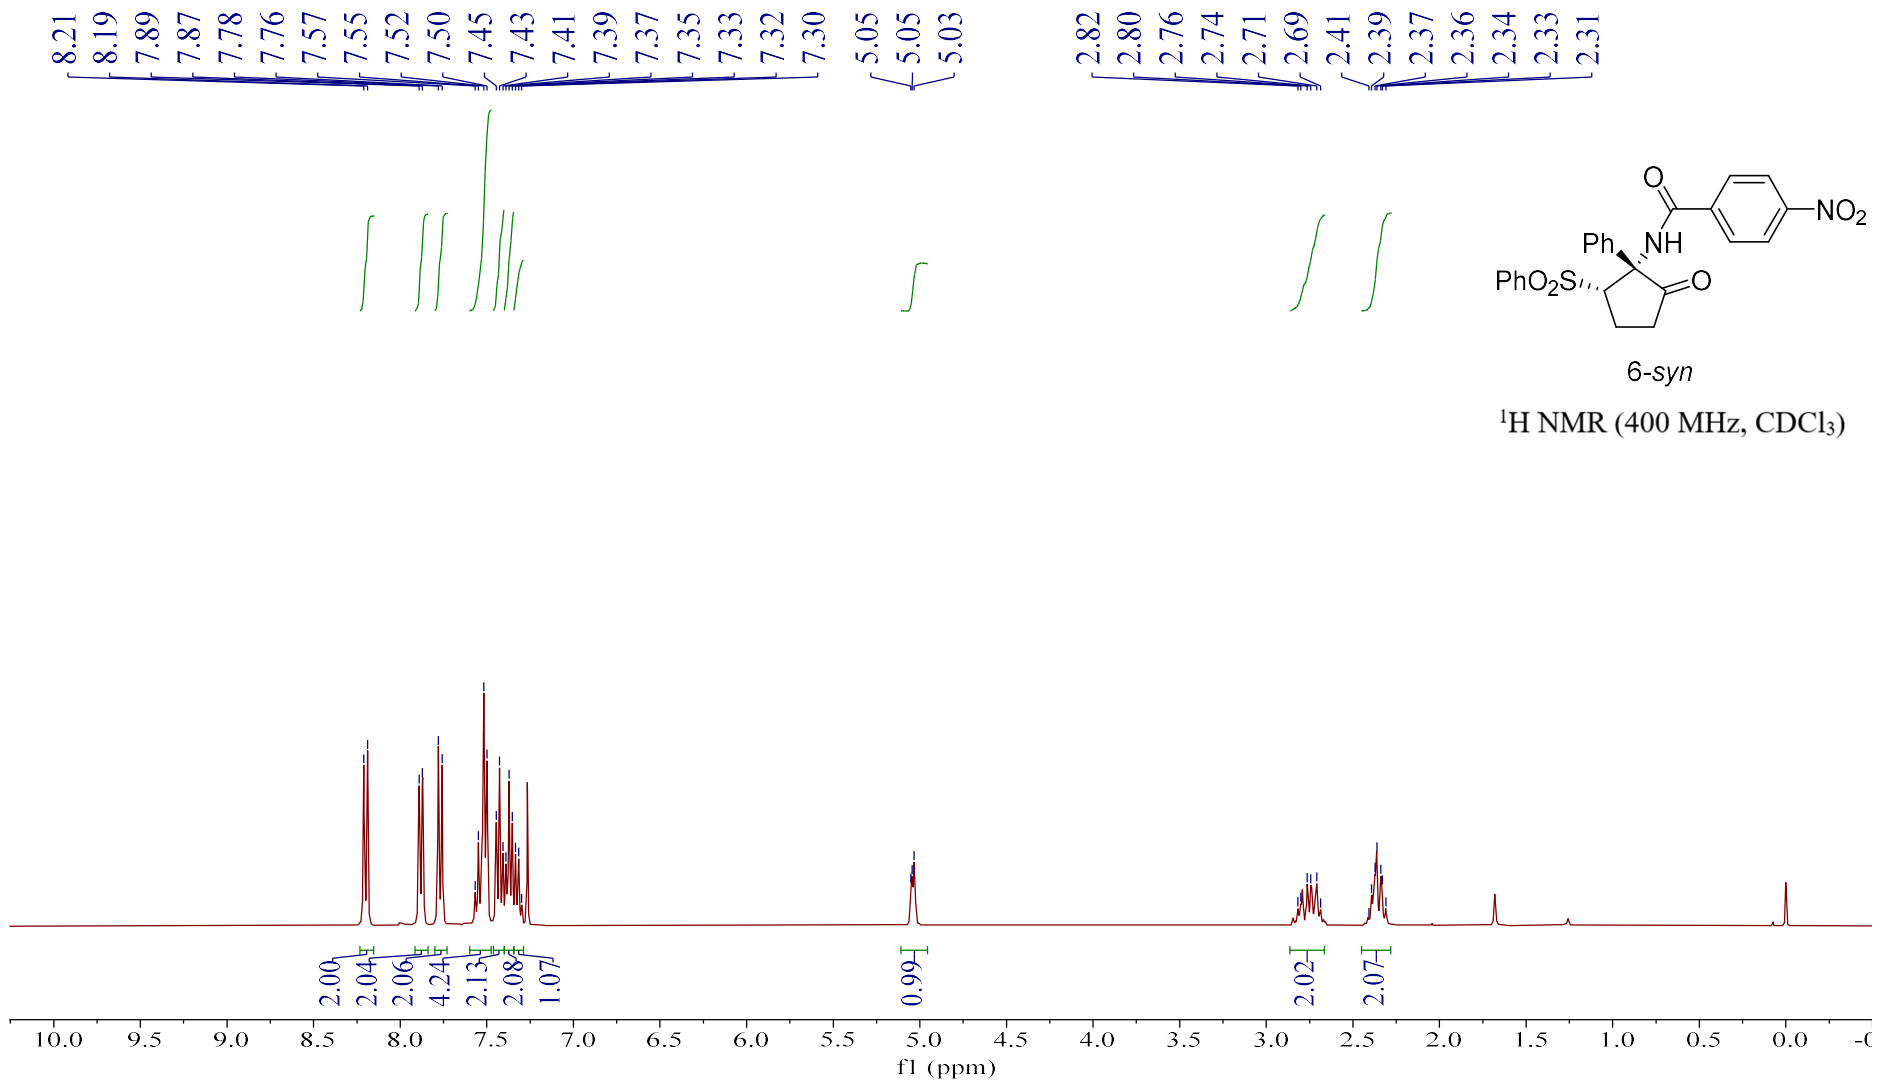

NMR-260



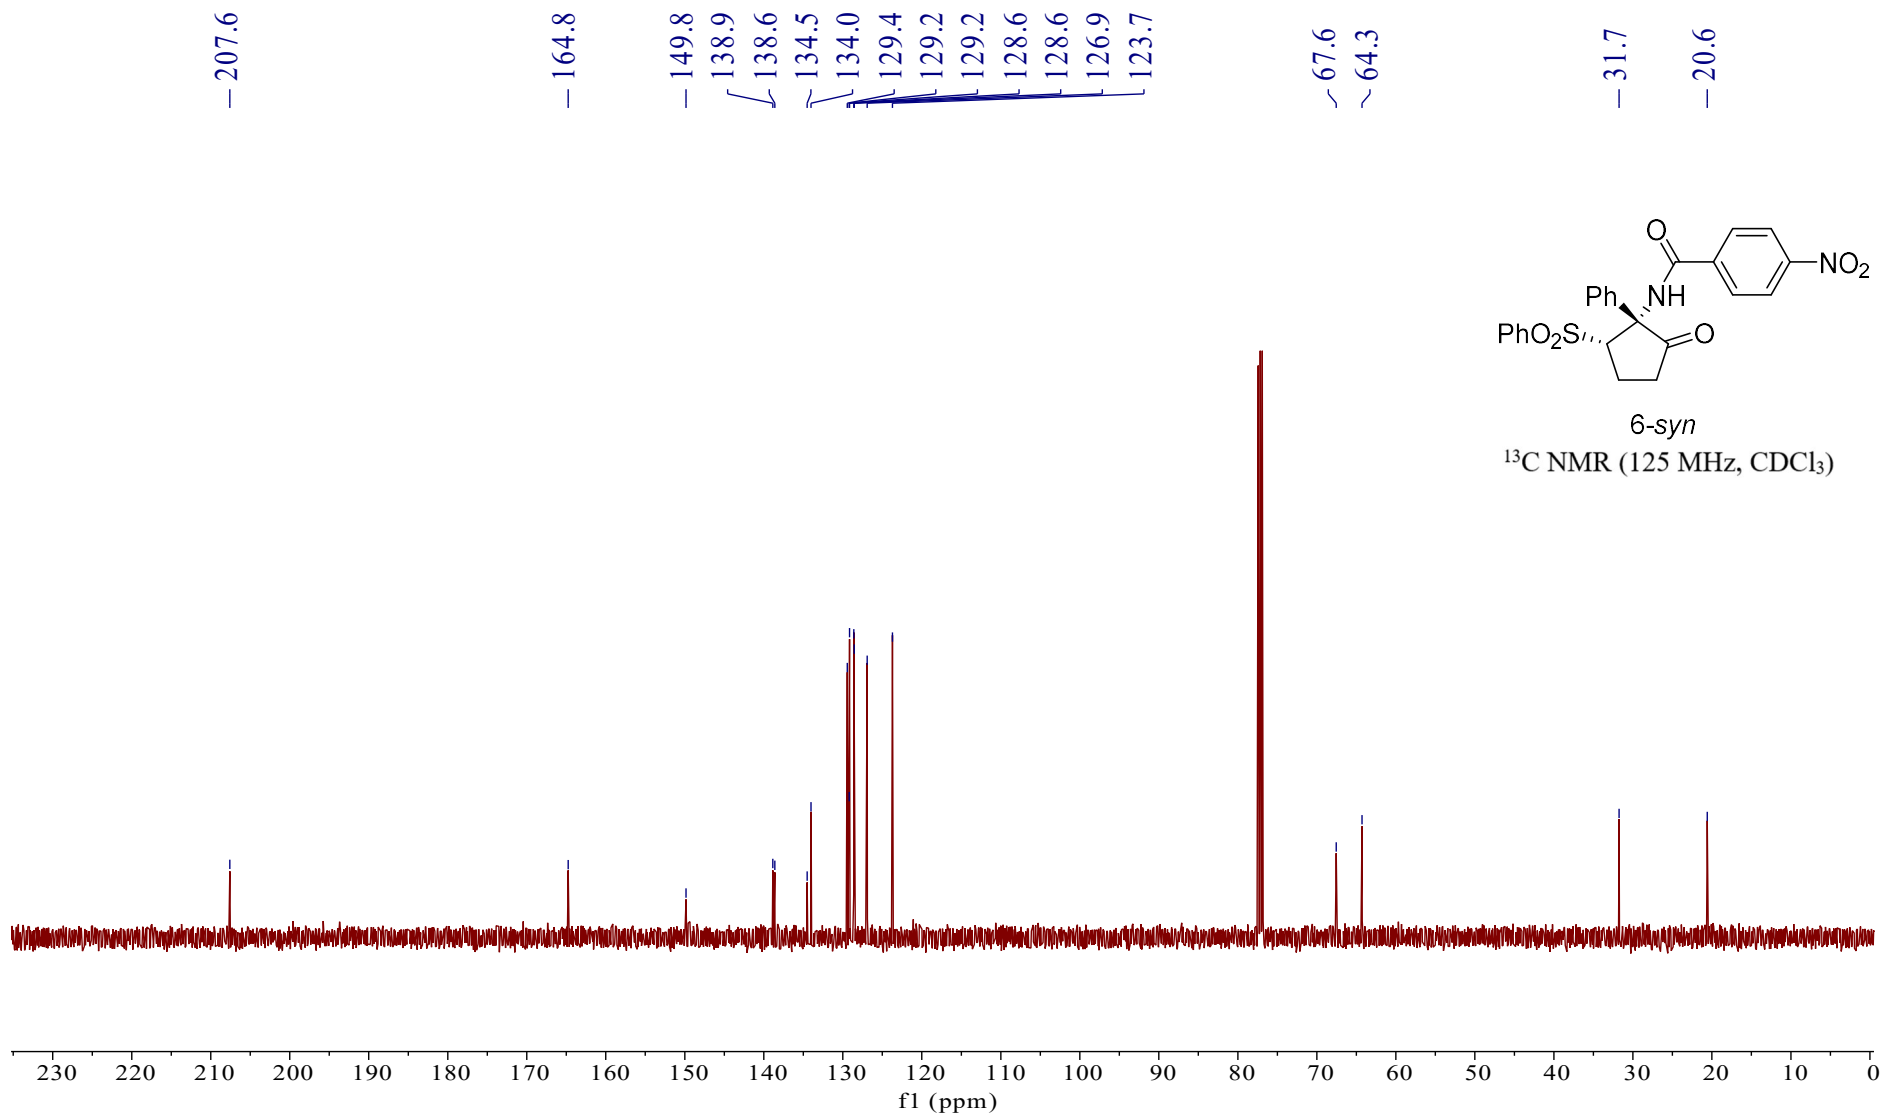

NMR-261

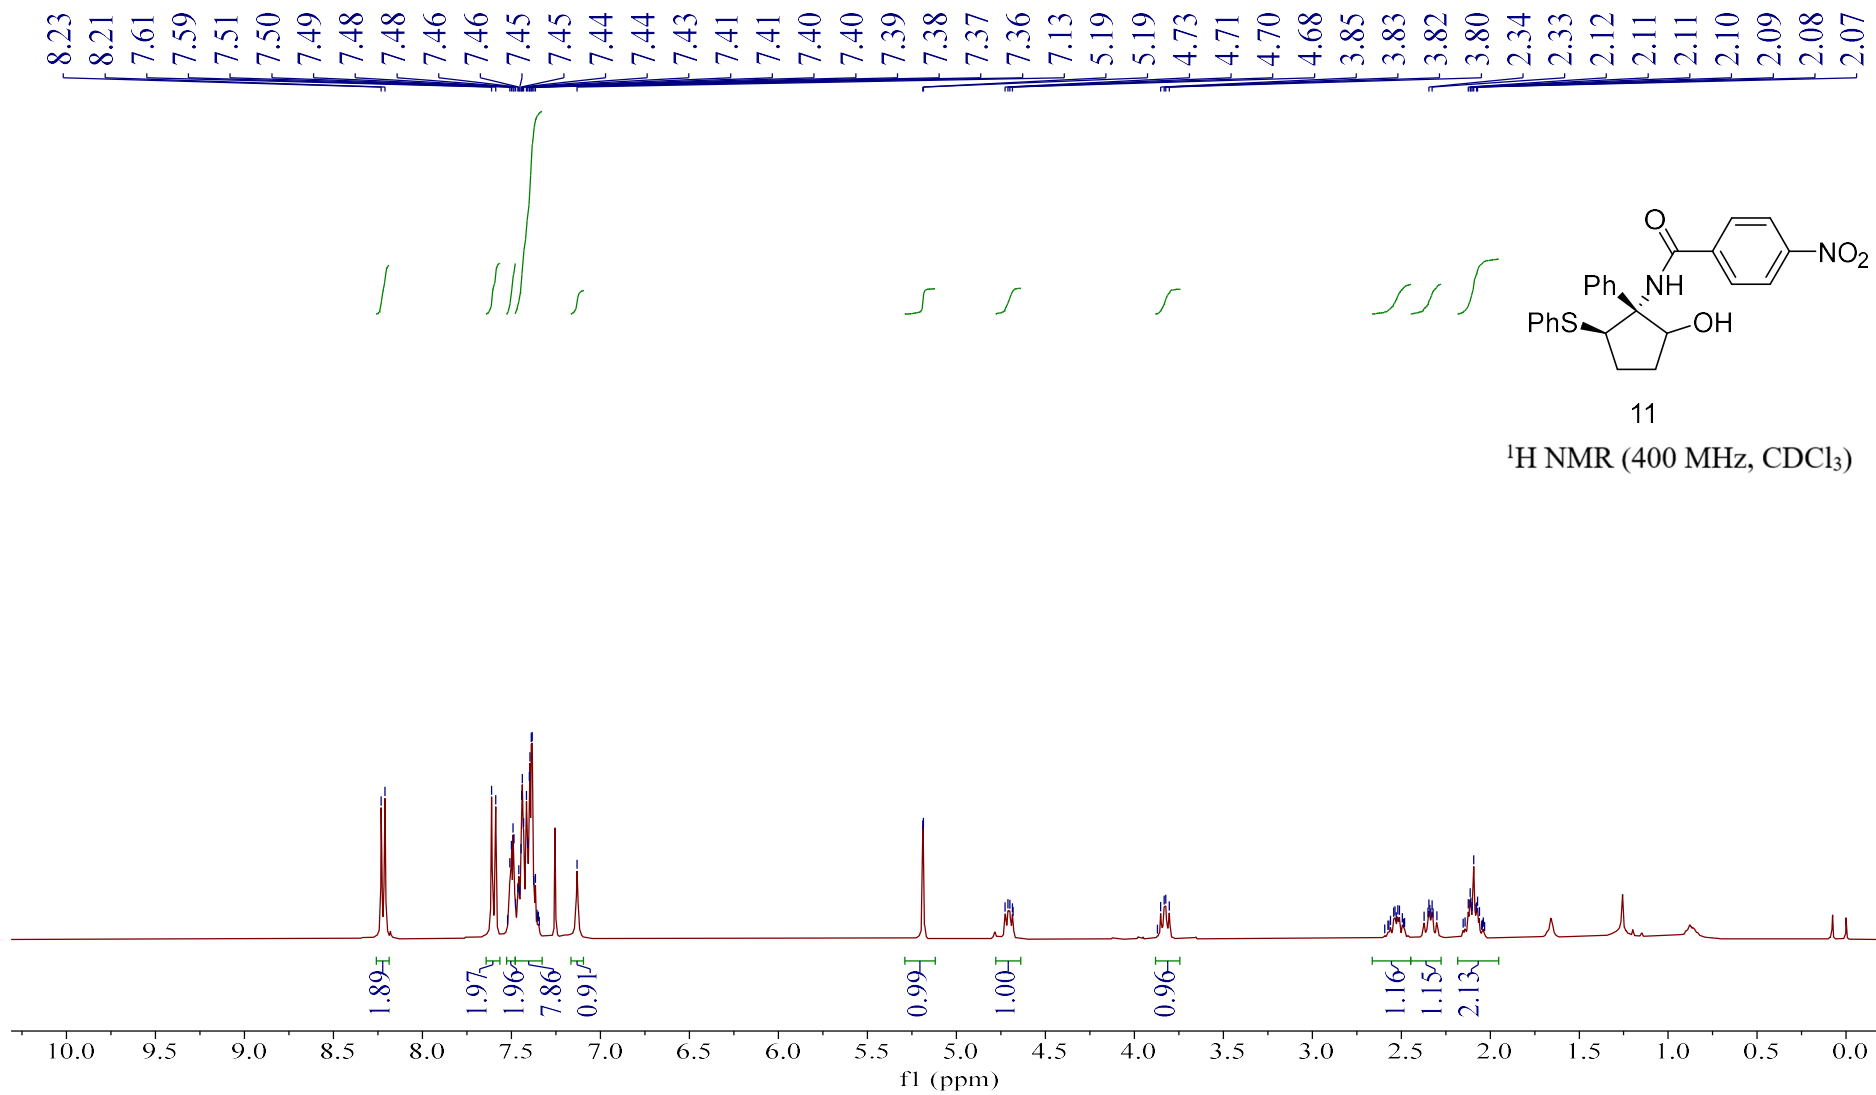

NMR-262

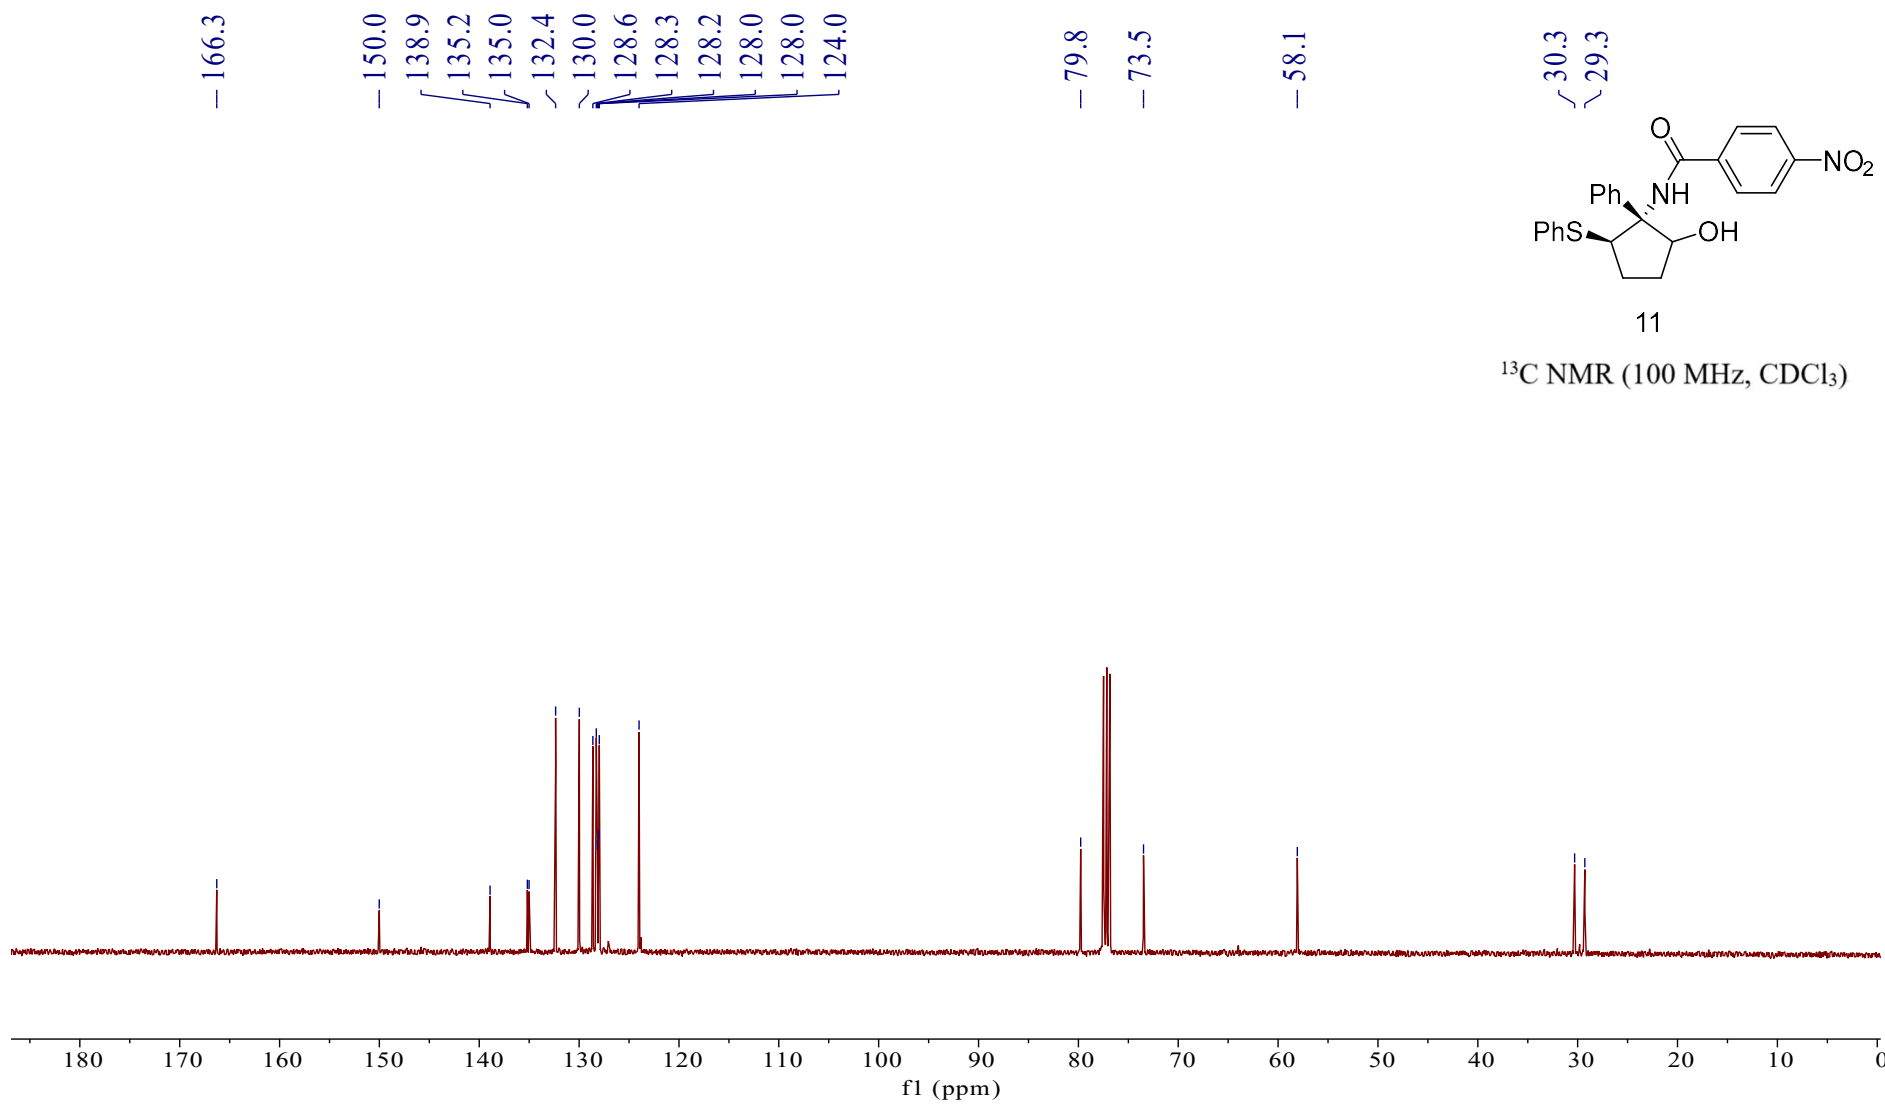

NMR-263

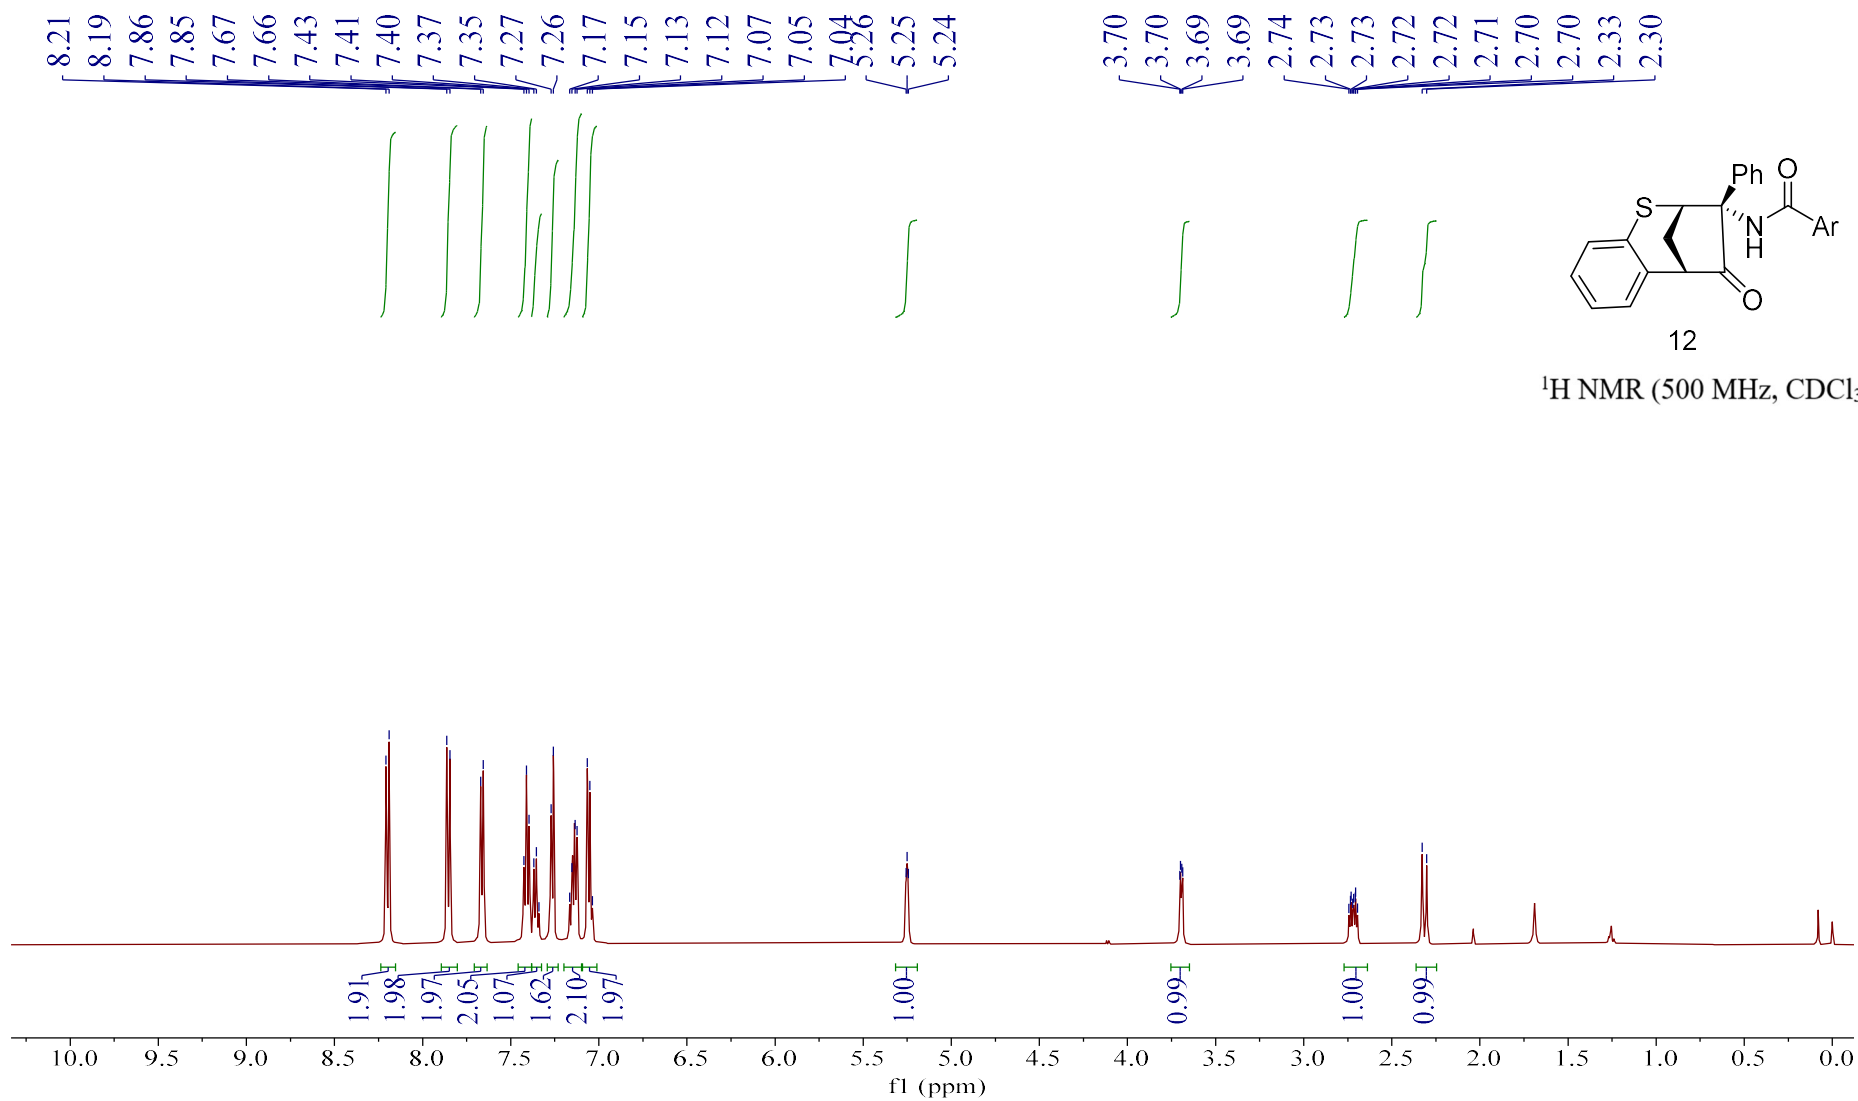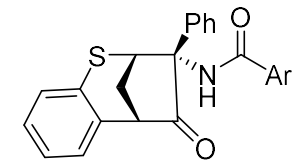

12

<sup>1</sup>H NMR (500 MHz, CDCl<sub>3</sub>)

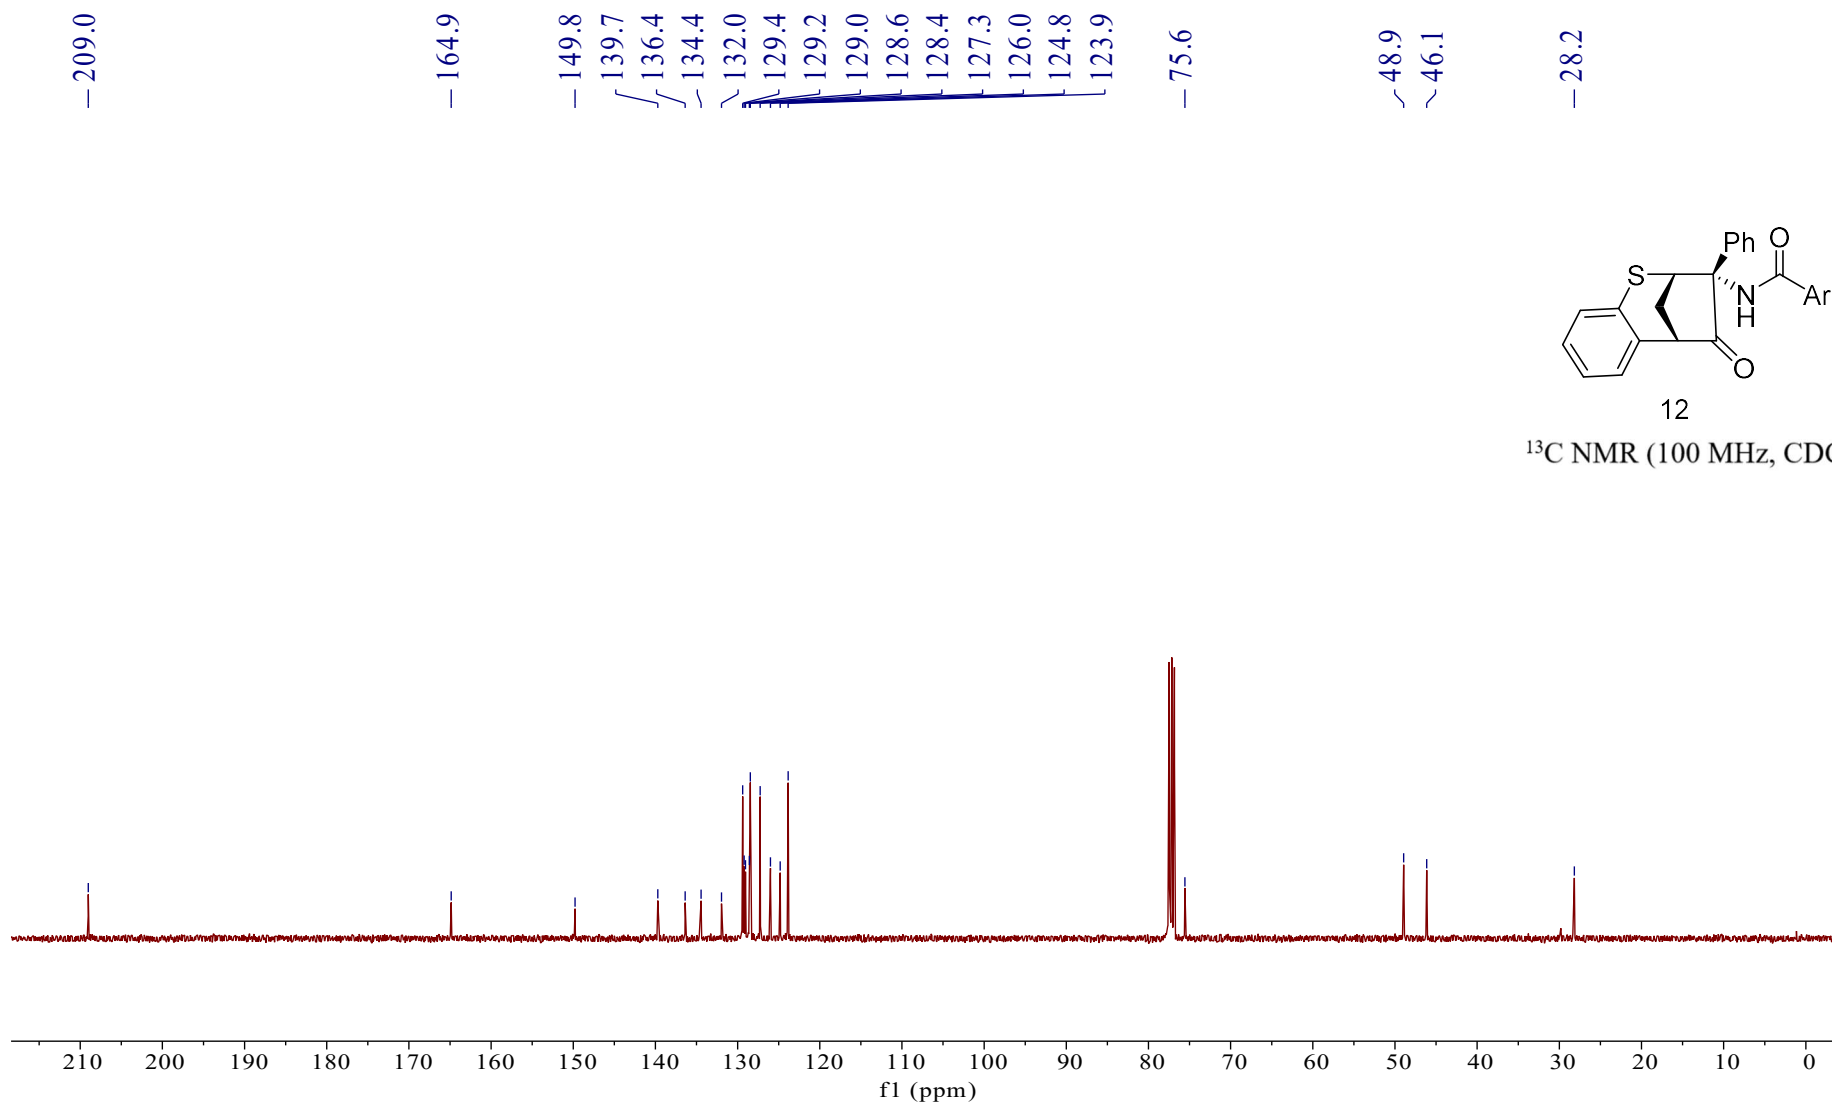

NMR-265
