# Supplementary material for: Selective synthesis of functionalized α,β-multi-substituted α-amino cyclopentanones via an α-iminol rearrangement enabled by Pd-catalyzed addition of arylboronic acids to nitriles
Source: Royal Society of Chemistry journal article supplement (doi:10.1039/d2qo01488b), 2022-01-01
Supplement: d2qo01488b2.pdf [file d2qo01488b2.pdf]

## Supporting Information

# Selective Synthesis of Functionalized $\alpha$ , $\beta$ -Multi-substituted $\alpha$ -Amino Cyclopentanones *via* $\alpha$ -Iminol Rearrangement Enabled by Pd- Catalyzed Addition of Arylboronic Acids to Nitriles

*Qian-Qian Ma,<sup>a</sup> Cheng-Jing Li,<sup>a</sup> Wei-Wei Liao<sup>a, b\*</sup>*

<sup>a</sup> Department of Organic Chemistry, College of Chemistry, Jilin University, 2699 Qianjin Street, Changchun 130012, P R China.

<sup>b</sup> State Key Laboratory of Organometallic Chemistry, Shanghai Institute of Organic Chemistry, Chinese Academy of Sciences, Shanghai 200032, P R China

E-mail: [wlliao@jlu.edu.cn](mailto:wlliao@jlu.edu.cn)

## Table of Contents

|              |                                                                           |              |
|--------------|---------------------------------------------------------------------------|--------------|
| <b>I.</b>    | <b>General Information.....</b>                                           | <b>SI-2</b>  |
| <b>II.</b>   | <b>Reaction Conditions Screening .....</b>                                | <b>SI-3</b>  |
| <b>III.</b>  | <b>Preparation of Substrates.....</b>                                     | <b>SI-5</b>  |
| <b>IV.</b>   | <b>General Procedure and Experimental Details.....</b>                    | <b>SI-21</b> |
| <b>V.</b>    | <b>Scale-up Experimental Procedure and Synthetic Transformations.....</b> | <b>SI-40</b> |
| <b>VI.</b>   | <b>References.....</b>                                                    | <b>SI-42</b> |
| <b>VII.</b>  | <b>Crystal Data and Structure Refinements.....</b>                        | <b>SI-43</b> |
| <b>VIII.</b> | <b><sup>1</sup>H and <sup>13</sup>C NMR Spectral Copies</b>               |              |

## I. General Information

All reactions were carried out under inert atmospheric condition unless otherwise noted, and solvents were dried according to established procedures. Reactions were monitored by thin layer chromatography (TLC) visualizing with ultraviolet light (UV),  $\text{KMnO}_4$ , *p*-anisaldehyde stain, and phosphomolybdic acid (PMA) stain; column chromatography purifications were carried out using silica gel. For reactions that require heating, oil bath was used. Proton nuclear magnetic resonance ( $^1\text{H}$  NMR) spectra were recorded on a 300, 400 or 500 MHz spectrometer in  $\text{CDCl}_3$  or DMSO, and carbon nuclear magnetic resonance ( $^{13}\text{C}$  NMR) spectra were recorded on 125 or 100 MHz spectrometer in  $\text{CDCl}_3$  or DMSO unless otherwise noted. Chemical shifts for protons are reported in parts per million downfield from tetramethylsilane (TMS) and are referenced to residual protium in the NMR solvent ( $\text{CHCl}_3 = \delta$  7.26 ppm, DMSO =  $\delta$  2.50 ppm). Chemical shifts for carbon are reported in parts per million downfield from tetramethylsilane (TMS) and are referenced to the carbon resonances of the solvent residual peak ( $\text{CDCl}_3 = \delta$  77.16 ppm, DMSO =  $\delta$  39.52 ppm). NMR data are presented as follows: chemical shift ( $\delta$  ppm), multiplicity (s = singlet, d = doublet, t = triplet, q = quartet, m = multiplet, br = broad), coupling constant in Hertz (Hz), integration. Mass spectra were recorded on the Bruker MicrOTOF Q II.

## II. Reaction Conditions Screening

**Table S1. Optimization of Solvents and Additives <sup>a</sup>**

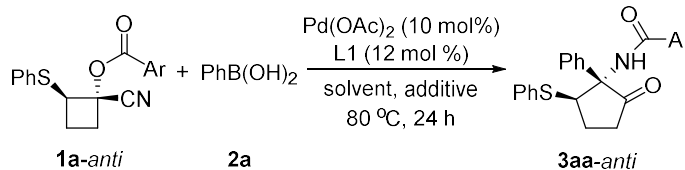

| Entry | Solvent | Additive (equiv.) | Conv. (%) <sup>b</sup> | Yield (%) <sup>c</sup> |
|-------|---------|-------------------|------------------------|------------------------|
| 1     | THF     | -                 | 45                     | 28                     |
| 2     | Dioxane | -                 | 22                     | 18                     |
| 3     | DCE     | -                 | 47                     | 33                     |
| 4     | Toluene | -                 | 24                     | 20                     |
| 5     | NMP     | -                 | 68                     | 39                     |
| 6     | NMA     | -                 | 79                     | 66                     |
| 7     | DMA     | -                 | 62                     | 65                     |
| 8     | DMF     | -                 | 69                     | 63                     |
| 9     | NMA     | HOAc (0.4)        | 79                     | 69                     |
| 10    | NMA     | TFA (0.4)         | 76                     | 61                     |
| 11    | NMA     | HOAc (0.2)        | 85                     | 67                     |
| 12    | NMA     | HOAc (1.0)        | 83                     | 68                     |
| 13    | NMA     | NaOAc (2.0)       | 94                     | 10                     |
| 14    | NMA     | CsF (2.0)         | 85                     | 13                     |

<sup>a</sup> Reaction conditions: **1a-anti** (0.2 mmol), **2a** (0.4 mmol), Pd(OAc)<sub>2</sub> (10 mol %), bpy (12 mol %), additive and HOAc (0.4 equiv.) in solvent (c = 0.2 M) at 80 °C. <sup>b</sup> Calculation based on recovered starting material **1a**. <sup>c</sup> Isolated yields. L1: 2,2'-bipyridine.

**Table S2. Optimization of catalysts and ligands <sup>a</sup>**

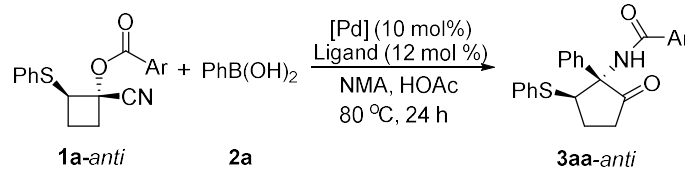

| Entry | Cat.                  | ligand | Conv. (%) <sup>b</sup> | Yield (%) <sup>c</sup> |
|-------|-----------------------|--------|------------------------|------------------------|
| 1     | Pd(OAc) <sub>2</sub>  | L1     | 79                     | 69                     |
| 2     | Pd(TFA) <sub>2</sub>  | L1     | 76                     | 61                     |
| 3     | Pd(acac) <sub>2</sub> | L1     | 87                     | 65                     |
| 4     | PdCl <sub>2</sub>     | L1     | 50                     | 41                     |
| 5     | Pd(OAc) <sub>2</sub>  | L2     | 85                     | 68                     |
| 6     | Pd(OAc) <sub>2</sub>  | L3     | 86                     | 73                     |
| 8     | Pd(OAc) <sub>2</sub>  | L4     | 91                     | 71                     |
| 9     | Pd(OAc) <sub>2</sub>  | L5     | 15                     | 10                     |
| 10    | Pd(OAc) <sub>2</sub>  | L6     | 80                     | 68                     |

<sup>a</sup> Reaction conditions: **1a-anti** (0.2 mmol), **2a** (0.4 mmol), catalyst (10 mol %), ligand (12 mol %) and HOAc (0.4 equiv.) in NMA (c = 0.2 M) at 80 °C. <sup>b</sup> Calculation based on recovered starting material **1a**. <sup>c</sup> Isolated yields.

L1: 2,2'-bipyridine. L2: 4,4'-di-methyl-2,2'-bipyridine. L3: 4,4'-di-tert-butyl-2,2'-bipyridine. L4: 5,5'-di-methyl-2,2'-bipyridine. L5: 6,6'-di-methyl-2,2'-bipyridine. L6: 1,10-phenanthroline.

**Table S3. Optimization of other parameters <sup>a</sup>**

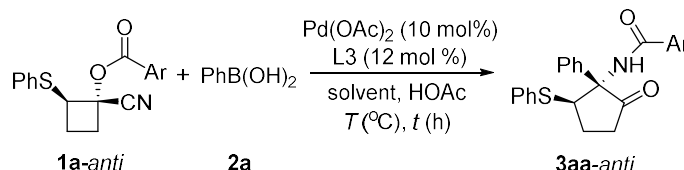

$\mathbf{1a-anti} + \mathbf{2a} \xrightarrow[\text{solvent, HOAc}]{\text{Pd(OAc)}_2 (10 \text{ mol\%}), \text{L3} (12 \text{ mol\%})} \mathbf{3aa-anti}$   
 $T(^{\circ}\text{C}), t(\text{h})$

| Entry              | Solvent | T (°C) | <i>t</i> (h) | Conv. (%) <sup>b</sup> | Yield (%) <sup>c</sup> |
|--------------------|---------|--------|--------------|------------------------|------------------------|
| 1                  | NMA     | 80     | 24           | 86                     | 73                     |
| 2                  | NMA     | 60     | 24           | 92                     | 77                     |
| 3                  | NMA     | 40     | 24           | 57                     | 51                     |
| 4                  | NMA     | 100    | 24           | 89                     | 73                     |
| 5                  | NMA     | 60     | 12           | 91                     | 74                     |
| 6                  | NMA     | 60     | 36           | 92                     | 81                     |
| 7 <sup>d</sup>     | NMA     | 60     | 24           | 96                     | 83                     |
| 8 <sup>d, e</sup>  | NMA     | 60     | 24           | 88                     | 75                     |
| 9 <sup>d, f</sup>  | NMA     | 60     | 24           | 50                     | 39                     |
| 10 <sup>d</sup>    | DMA     | 60     | 24           | 94                     | 87                     |
| 11 <sup>d</sup>    | DMF     | 60     | 24           | 96                     | 83                     |
| 12 <sup>d</sup>    | DMA     | 80     | 24           | 99                     | 89                     |
| 13 <sup>d</sup>    | DMF     | 80     | 24           | 100                    | 92                     |
| 14 <sup>d</sup>    | NMA     | 80     | 24           | 100                    | 85                     |
| 15 <sup>d, g</sup> | DMF     | 80     | 24           | 95                     | 89                     |
| 16 <sup>d, h</sup> | DMF     | 80     | 24           | nr                     | nd                     |
| 17 <sup>d, i</sup> | DMF     | 80     | 24           | nr                     | nd                     |

<sup>a</sup> Reaction conditions: **1a-anti** (0.2 mmol), **2a** (0.4 mmol), Pd(OAc)<sub>2</sub> (10 mol %), L3 (12 mol %) and HOAc (0.4 equiv.) in NMA (c = 0.2 M). <sup>b</sup> Calculation based on recovered starting material **1a**. <sup>c</sup> Isolated yields. <sup>d</sup> c = 0.4 M. <sup>e</sup> **2a** (0.3 mmol). <sup>f</sup> Pd(OAc)<sub>2</sub> (5 mol %), L3 (6 mol %). <sup>g</sup> 4Å MS was added. <sup>h</sup> Without Pd(OAc)<sub>2</sub>. <sup>i</sup> Without L3.

### III. Preparation of Substrates

#### 1) Preparation of substrates 1 or 7:

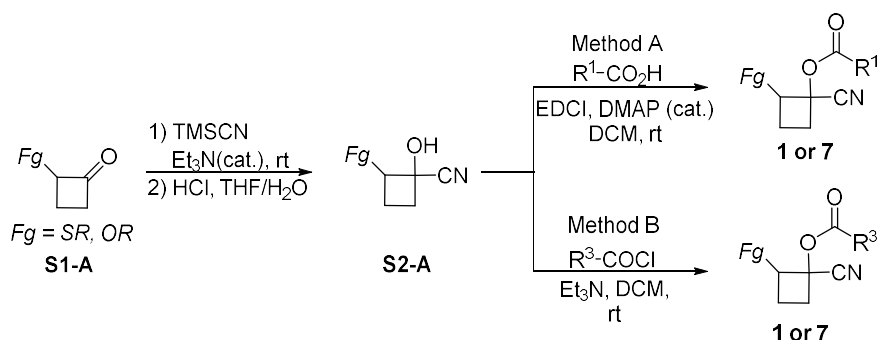

To a mixture of **S1-A**<sup>1-3</sup> (1.0 equiv.) and Et<sub>3</sub>N (10 mol %), TMSCN (1.1 equiv.) was slowly added at rt.<sup>4</sup> Upon completion, the reaction was concentrated *in vacuo*. The residue was treated with THF-HCl (4*N*, aq.) (1/1), and the mixture was stirred at rt. Upon completion, the aqueous phase extracted with EtOAc. The combined organic phases were washed with brine before being dried over Na<sub>2</sub>SO<sub>4</sub>, then filtered and concentrated under reduced pressure. The residue was purified by flash column chromatography (silica gel, EtOAc/Petroleum ether (60–90 °C)) to give the desired compounds **S2-A** as separable *anti*- and *syn*-mixtures which can be easily separated by flash column chromatography.

#### Method A for 1a-1j, 1l, 1n-1u and 7:<sup>5</sup>

A mixture of cyanohydrin **S2-A** (1 mmol, *anti*- or *syn*-isomer), acid (1.2 equiv.), DMAP (10 mol %) and EDCI (1.2 equiv.) in DCM (0.2 *M*) was stirred at room temperature. Upon completion, water was added and the mixture was extracted with DCM, and the combined organic layers were washed by brine and dried over Na<sub>2</sub>SO<sub>4</sub>, then filtered and concentrated under reduced pressure. The residue was purified by flash column chromatography (silica gel, EtOAc/Petroleum ether (60–90 °C)) to give the desired compounds **1 or 7**.

#### Method B for 1k and 1m:<sup>6</sup>

To a solution of acyl chloride (1.2 equiv.) and Et<sub>3</sub>N (1.2 equiv.) in DCM (0.2 *M*) at 0 °C was slowly added a solution of **S2-A** (1.0 mmol, *anti*- or *syn*-isomer) in DCM. The resulting mixture was allowed to warm to room temperature. Upon completion, the resulting mixture was washed with 1*N* HCl, and extracted with DCM. The combined organic layers were washed by brine and dried over Na<sub>2</sub>SO<sub>4</sub>, then filtered and concentrated under reduced pressure. The residue was purified by flash column chromatography (silica gel, EtOAc/Petroleum ether (60–90 °C)) to give compounds **1**.

#### 2) Preparation of substrates 9:

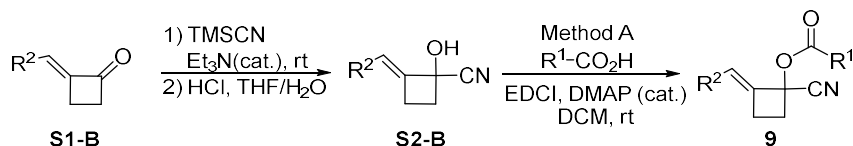

The substrates **9** were prepared from compounds **S2-B**, which were synthesized from compounds **S1-B**,<sup>7</sup> according to the similar procedures for compounds **1 or 7**.

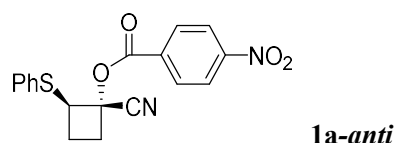

Purified by column chromatography (silica gel, EtOAc/Petroleum ether: 1/10) to afford the title compound (77% yield, 273 mg) as a yellow solid. mp: 112 °C. <sup>1</sup>H NMR (400 MHz, CDCl<sub>3</sub>) δ 8.27 (d, *J* = 8.8 Hz, 2H), 7.97 (d, *J* = 8.9 Hz, 2H), 7.64–7.54 (m, 2H), 7.41 – 7.32 (m, 3H), 4.23 – 4.16 (m, 1H), 3.15 – 3.05 (m, 1H), 2.57 – 2.34 (m, 2H), 2.22 – 2.02 (m, 1H). <sup>13</sup>C NMR (125 MHz, CDCl<sub>3</sub>) δ 162.2, 151.2, 133.6, 133.5, 132.8, 131.1, 129.4, 128.2, 123.8, 115.8, 50.7, 50.7, 33.2, 22.2. HRMS (ESI) *m/z*: [M + Na]<sup>+</sup> Calcd for C<sub>18</sub>H<sub>14</sub>N<sub>2</sub>O<sub>4</sub>SNa 377.0566; Found 377.0561.

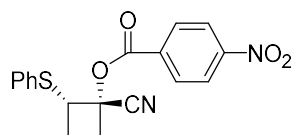

**1a-syn**

Purified by column chromatography (silica gel, EtOAc/Petroleum ether: 1/15) to afford the title compound (75% yield, 266 mg) as a yellow oil. <sup>1</sup>H NMR (400 MHz, CDCl<sub>3</sub>) δ 8.26 (d, *J* = 8.9 Hz, 2H), 8.07 (d, *J* = 8.9 Hz, 2H), 7.41 – 7.37 (m, 2H), 7.36 – 7.31 (m, 2H), 7.31 – 7.27 (m, 1H), 4.63 – 4.54 (m, 1H), 3.03 – 2.90 (m, 1H), 2.82 – 2.66 (m, 1H), 2.26 – 2.13 (m, 1H). <sup>13</sup>C NMR (125 MHz, CDCl<sub>3</sub>) δ 162.4, 151.1, 134.2, 133.8, 131.2, 129.9, 129.4, 127.3, 123.8, 117.7, 70.6, 50.9, 32.8, 23.6. HRMS (ESI) *m/z*: [M + Na]<sup>+</sup> Calcd for C<sub>18</sub>H<sub>14</sub>N<sub>2</sub>O<sub>4</sub>SNa 377.0566; Found 377.0569.

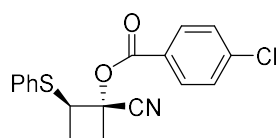

**1b-anti**

Purified by column chromatography (silica gel, EtOAc/Petroleum ether: 1/20) to afford the title compound (76% yield, 261 mg) as a white solid. mp: 105 °C. <sup>1</sup>H NMR (500 MHz, CDCl<sub>3</sub>) δ 7.78 (d, *J* = 8.5 Hz, 2H), 7.60 (d, *J* = 6.5 Hz, 2H), 7.43 (d, *J* = 8.6 Hz, 2H), 7.41 – 7.31 (m, 3H), 4.25 – 4.13 (m, 1H), 3.17 – 3.04 (m, 1H), 2.62 – 2.34 (m, 2H), 2.24 – 2.01 (m, 1H). <sup>13</sup>C NMR (125 MHz, CDCl<sub>3</sub>) δ 163.2, 140.8, 133.7, 132.4, 131.3, 129.3, 129.1, 128.0, 126.7, 116.1, 76.9, 50.5, 33.2, 22.2. HRMS (ESI) *m/z*: [M + Na]<sup>+</sup> Calcd for C<sub>18</sub>H<sub>14</sub>ClNO<sub>2</sub>SNa 366.0326; Found 366.0325.

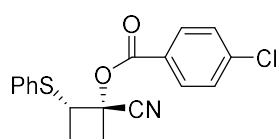

**1b-syn**

Purified by column chromatography (silica gel, EtOAc/Petroleum ether: 1/25) to afford the title compound (69% yield, 237 mg) as a white solid. mp: 107 °C. <sup>1</sup>H NMR (400 MHz, CDCl<sub>3</sub>) δ 7.85 (d, *J* = 8.6 Hz, 2H), 7.43 – 7.36 (m, 4H), 7.32 (t, *J* = 7.4 Hz, 2H), 7.29 – 7.22 (m, 1H), 4.58 – 4.50 (m, 1H), 2.98 – 2.85 (m, 1H), 2.79 – 2.61 (m, 2H), 2.25 – 2.11 (m, 1H). <sup>13</sup>C NMR (125 MHz, CDCl<sub>3</sub>) δ 163.5, 140.8, 134.4, 131.5, 130.2, 129.4, 129.2, 127.4, 127.0, 118.1, 70.1, 51.2, 32.9, 23.8. HRMS (ESI) *m/z*: [M + Na]<sup>+</sup> Calcd for C<sub>18</sub>H<sub>14</sub>ClNO<sub>2</sub>SNa 366.0326; Found 366.0323.

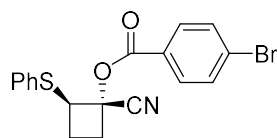

**1c-anti**

Purified by column chromatography (silica gel, EtOAc/Petroleum ether: 1/20) to afford the title compound (83% yield, 322 mg) as a white solid. mp: 92 °C. <sup>1</sup>H NMR (400 MHz, CDCl<sub>3</sub>) δ 7.67 (d, *J* = 8.6 Hz, 2H), 7.60 – 7.53 (m,

4H), 7.38 – 7.28 (m, 3H), 4.23 – 4.10 (m, 1H), 3.07 – 3.02 (m, 1H), 2.52 – 2.33 (m, 2H), 2.17 – 2.00 (m, 1H). <sup>13</sup>C NMR (125 MHz, CDCl<sub>3</sub>) δ 163.4, 133.8, 132.8, 132.2, 131.4, 129.5, 129.3, 128.0, 127.2, 116.1, 50.6, 33.2, 29.8, 22.2. HRMS (ESI) m/z: [M + Na]<sup>+</sup> Calcd for C<sub>18</sub>H<sub>14</sub>BrNO<sub>2</sub>SNa 409.9821; Found 409.9818.

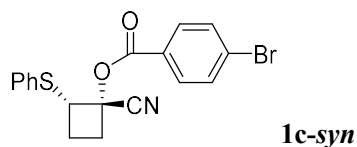

Purified by column chromatography (silica gel, EtOAc/Petroleum ether: 1/30) to afford the title compound (75% yield, 291 mg) as a white solid. mp: 88 °C. <sup>1</sup>H NMR (400 MHz, CDCl<sub>3</sub>) δ 8.30 (d, *J* = 8.9 Hz, 2H), 8.11 (d, *J* = 8.8 Hz, 2H), 7.45 (d, *J* = 8.5 Hz, 2H), 7.26-7.24 (m, 3H), 4.56 – 4.48 (m, 1H), 3.01 – 2.90 (m, 1H), 2.83 – 2.64 (m, 2H), 2.28 – 2.14 (m, 1H). <sup>13</sup>C NMR (125 MHz, CDCl<sub>3</sub>) δ 162.5, 151.2, 133.7, 133.3, 132.5, 131.7, 131.3, 123.9, 121.6, 117.6, 70.6, 51.2, 32.7, 23.9. HRMS (ESI) m/z: [M + Na]<sup>+</sup> Calcd for C<sub>18</sub>H<sub>14</sub>BrNO<sub>2</sub>SNa 409.9821; Found 409.9807.

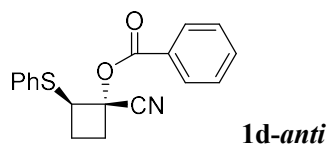

Purified by column chromatography (silica gel, EtOAc/Petroleum ether: 1/15) to afford the title compound (80% yield, 248 mg) as a white solid. mp: 80 °C. <sup>1</sup>H NMR (400 MHz, CDCl<sub>3</sub>) δ 7.87 – 7.83 (m, 2H), 7.64 – 7.54 (m, 3H), 7.43 (t, *J* = 7.9 Hz, 2H), 7.39 – 7.27 (m, 3H), 4.23 – 4.14 (m, 1H), 3.12 – 3.02 (m, 1H), 2.51 – 2.34 (m, 2H), 2.17 – 2.01 (m, 1H). <sup>13</sup>C NMR (100 MHz, CDCl<sub>3</sub>) δ 164.1, 134.2, 134.0, 132.2, 130.0, 129.3, 128.8, 128.3, 127.9, 116.3, 76.8, 50.5, 33.2, 22.3. HRMS (ESI) m/z: [M + Na]<sup>+</sup> Calcd for C<sub>18</sub>H<sub>15</sub>NO<sub>2</sub>SNa 332.0716; Found 332.0708.

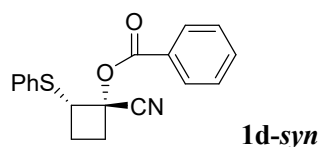

Purified by column chromatography (silica gel, EtOAc/Petroleum ether: 1/20) to afford the title compound (72% yield, 223 mg) as a white solid. mp: 81 °C. <sup>1</sup>H NMR (500 MHz, CDCl<sub>3</sub>) δ 7.97 (d, *J* = 6.8 Hz, 2H), 7.60 (t, *J* = 7.4 Hz, 1H), 7.44 (d, *J* = 7.7 Hz, 2H), 7.41 (d, *J* = 7.3 Hz, 2H), 7.32 (t, *J* = 7.6 Hz, 2H), 7.27 (d, *J* = 7.7 Hz, 1H), 4.57 – 4.50 (m, 1H), 2.97 – 2.87 (m, 1H), 2.79 – 2.59 (m, 2H), 2.25 – 2.14 (m, 1H). <sup>13</sup>C NMR (125 MHz, CDCl<sub>3</sub>) δ 164.3, 134.4, 134.1, 130.4, 130.2, 129.4, 128.8, 128.6, 127.4, 118.3, 70.0, 51.4, 32.9, 24.1. HRMS (ESI) m/z: [M + Na]<sup>+</sup> Calcd for C<sub>18</sub>H<sub>15</sub>NO<sub>2</sub>SNa 332.0716; Found 332.0710.

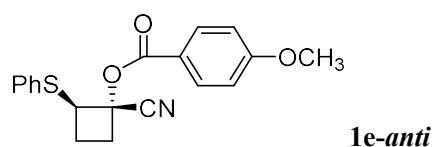

Purified by column chromatography (silica gel, EtOAc/Petroleum ether: 1/8) to afford the title compound (78% yield, 265 mg) as a colorless oil. <sup>1</sup>H NMR (500 MHz, CDCl<sub>3</sub>) δ 7.81 (d, *J* = 8.9 Hz, 2H), 7.56 (d, *J* = 6.8 Hz, 2H), 7.34 (t, *J* = 7.3 Hz, 2H), 7.30 (t, *J* = 7.2 Hz, 1H), 6.89 (d, *J* = 8.8 Hz, 2H), 4.18 – 4.14 (m, 1H), 3.86 (s, 3H), 3.07 – 3.03 (m, 1H), 2.48 – 2.35 (m, 2H), 2.12 – 2.04 (m, 1H). <sup>13</sup>C NMR (125 MHz, CDCl<sub>3</sub>) δ 164.3, 163.8, 134.0, 132.1, 132.0,

129.2, 127.7, 120.5, 116.4, 114.0, 76.6, 55.6, 50.3, 33.2, 22.3. HRMS (ESI) m/z:  $[M + H]^+$  Calcd for  $C_{19}H_{18}NO_3S$  340.1002; Found 340.1005.

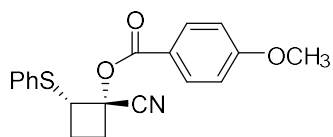

**1e-syn**

Purified by column chromatography (silica gel, EtOAc/Petroleum ether: 1/8) to afford the title compound (79% yield, 268 mg) as a colorless oil.  $^1H$  NMR (400 MHz,  $CDCl_3$ )  $\delta$  7.91 (d,  $J = 8.9$  Hz, 2H), 7.41 (d,  $J = 7.0$  Hz, 2H), 7.32 (t,  $J = 7.4$  Hz, 2H), 7.28 – 7.20 (m, 1H), 6.90 (d,  $J = 8.9$  Hz, 2H), 4.54 – 4.49 (m, 1H), 3.86 (s, 3H), 2.96 – 2.84 (m, 1H), 2.77 – 2.57 (m, 2H), 2.25 – 2.11 (m, 1H).  $^{13}C$  NMR (100 MHz,  $CDCl_3$ )  $\delta$  164.3, 164.0, 134.5, 132.4, 130.3, 129.3, 127.3, 120.9, 118.4, 114.0, 69.7, 55.7, 51.3, 32.9, 24.1. HRMS (ESI) m/z:  $[M + H]^+$  Calcd for  $C_{19}H_{18}NO_3S$  340.1002; Found 340.0997.

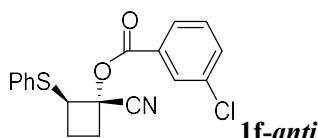

**1f-anti**

Purified by column chromatography (silica gel, EtOAc/Petroleum ether: 1/15) to afford the title compound (88% yield, 302 mg) as a colorless oil.  $^1H$  NMR (400 MHz,  $CDCl_3$ )  $\delta$  7.76 – 7.72 (m, 2H), 7.60 – 7.55 (m, 3H), 7.39 – 7.31 (m, 4H), 4.20 – 4.15 (m, 1H), 3.13 – 2.99 (m, 1H), 2.52 – 2.33 (m, 2H), 2.16 – 2.02 (m, 1H).  $^{13}C$  NMR (125 MHz,  $CDCl_3$ )  $\delta$  162.8, 134.8, 134.1, 133.6, 132.3, 130.1, 130.0, 129.9, 129.3, 128.1, 128.1, 116.0, 77.1, 50.5, 33.2, 22.1. HRMS (ESI) m/z:  $[M + Na]^+$  Calcd for  $C_{18}H_{14}ClNO_2SNa$  366.0326; Found 366.0322.

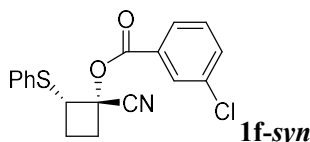

**1f-syn**

Purified by column chromatography (silica gel, EtOAc/Petroleum ether: 1/20) to afford the title compound (75% yield, 257 mg) as a colorless oil.  $^1H$  NMR (400 MHz,  $CDCl_3$ )  $\delta$  7.89 – 7.88 (m, 1H), 7.83 (d,  $J = 7.8$  Hz, 1H), 7.58 – 7.55 (m, 1H), 7.43 – 7.37 (m, 3H), 7.36 – 7.34 (m, 1H), 7.32 (d,  $J = 7.9$  Hz, 1H), 7.29 – 7.26 (m, 1H), 4.60 – 4.49 (m, 1H), 2.99 – 2.86 (m, 1H), 2.79 – 2.59 (m, 2H), 2.26 – 2.09 (m, 1H).  $^{13}C$  NMR (100 MHz,  $CDCl_3$ )  $\delta$  163.2, 134.9, 134.3, 134.2, 130.3, 130.1, 130.0, 129.4, 128.3, 127.4, 118.0, 70.2, 51.1, 32.9, 23.7. HRMS (ESI) m/z:  $[M + Na]^+$  Calcd for  $C_{18}H_{14}ClNO_2SNa$  366.0326; Found 366.0323.

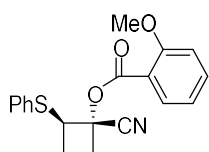

**1g-anti**

Purified by column chromatography (silica gel, EtOAc/Petroleum ether: 1/15) to afford the title compound (84% yield, 285 mg) as a white solid. mp: 76 °C.  $^1H$  NMR (400 MHz,  $CDCl_3$ )  $\delta$  7.65 (dd,  $J = 7.8, 1.8$  Hz, 1H), 7.57 – 7.51 (m, 3H), 7.34 – 7.27 (m, 3H), 6.99 (d,  $J = 7.5$  Hz, 1H), 6.97 – 6.93 (m, 1H), 4.25 – 4.11 (m, 1H), 3.87 (s, 3H), 3.11 – 3.05 (m, 1H), 2.52 – 2.34 (m, 2H), 2.14 – 2.05 (m, 1H).  $^{13}C$  NMR (125 MHz,  $CDCl_3$ ) 170.4, 139.7, 133.9, 131.7, 129.2, 128.8, 128.8, 128.4, 127.7, 126.7, 116.1, 49.9, 35.6, 32.9, 30.7, 22.4. HRMS (ESI) m/z:  $[M + Na]^+$  Calcd for



C<sub>19</sub>H<sub>17</sub>NO<sub>3</sub>SNa 362.0821; Found 362.0823.

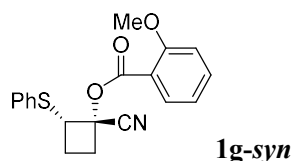

Purified by column chromatography (silica gel, EtOAc/Petroleum ether: 1/15) to afford the title compound (76% yield, 258 mg) as a white solid. mp: 79 °C. <sup>1</sup>H NMR (400 MHz, CDCl<sub>3</sub>) δ 7.81 (dd, *J* = 7.8, 1.8 Hz, 1H), 7.55 – 7.49 (m, 1H), 7.42 (dd, *J* = 7.0, 1.6 Hz, 2H), 7.34 – 7.28 (m, 2H), 7.28 – 7.20 (m, 1H), 6.99 (d, *J* = 8.5 Hz, 1H), 6.97 – 6.91 (m, 1H), 4.52 – 4.43 (m, 1H), 3.89 (s, 3H), 2.96 – 2.83 (m, 1H), 2.77 – 2.57 (m, 2H), 2.27 – 2.12 (m, 1H). <sup>13</sup>C NMR (100 MHz, CDCl<sub>3</sub>) δ 163.2, 160.6, 135.2, 134.6, 132.7, 130.5, 129.3, 127.3, 120.3, 118.4, 117.4, 112.3, 70.0, 56.0, 51.4, 33.0, 24.4. HRMS (ESI) *m/z*: [M + Na]<sup>+</sup> Calcd for C<sub>19</sub>H<sub>17</sub>NO<sub>3</sub>SNa 362.0821; Found 362.0822.

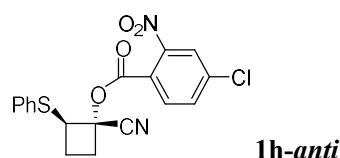

Purified by column chromatography (silica gel, EtOAc/Petroleum ether: 1/10) to afford the title compound (71% yield, 276 mg) as a yellow solid. mp: 83 °C. <sup>1</sup>H NMR (400 MHz, CDCl<sub>3</sub>) δ 7.94 (d, *J* = 1.8 Hz, 1H), 7.70 (t, *J* = 7.4 Hz, 2H), 7.34 (d, *J* = 7.7 Hz, 2H), 7.31 – 7.19 (m, 3H), 4.43 (t, *J* = 8.2 Hz, 1H), 2.93 – 2.72 (m, 2H), 2.71 – 2.52 (m, 1H), 2.34 – 2.13 (m, 1H). <sup>13</sup>C NMR (125 MHz, CDCl<sub>3</sub>) δ 162.0, 148.7, 139.2, 133.5, 133.4, 131.8, 131.6, 129.3, 127.8, 124.6, 123.9, 115.5, 77.6, 49.8, 32.0, 22.2. HRMS (ESI) *m/z*: [M + Na]<sup>+</sup> Calcd for C<sub>18</sub>H<sub>13</sub>ClN<sub>2</sub>O<sub>4</sub>SNa 411.0177; Found 411.0174.

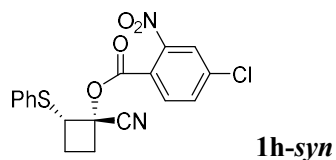

Purified by column chromatography (silica gel, EtOAc/Petroleum ether: 1/10) to afford the title compound (79% yield, 307 mg) as a yellow solid. mp: 84 °C. <sup>1</sup>H NMR (400 MHz, CDCl<sub>3</sub>) δ 7.99 (d, *J* = 9.4 Hz, 1H), 7.66 (s, 1H), 7.66 – 7.63 (m, 1H), 7.36 – 7.34 (m, 2H), 7.31 – 7.21 (m, 3H), 4.52 – 4.36 (m, 1H), 2.93 – 2.76 (m, 2H), 2.68 – 2.54 (m, 1H), 2.30 – 2.17 (m, 1H). <sup>13</sup>C NMR (100 MHz, CDCl<sub>3</sub>) δ 162.3, 148.8, 139.2, 134.0, 133.3, 131.8, 130.8, 129.3, 127.6, 124.7, 123.9, 117.2, 71.8, 51.4, 31.9, 24.7. HRMS (ESI) *m/z*: [M + Na]<sup>+</sup> Calcd for C<sub>18</sub>H<sub>13</sub>ClN<sub>2</sub>O<sub>4</sub>SNa 411.0177; Found 411.0180.

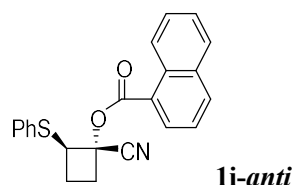

Purified by column chromatography (silica gel, EtOAc/Petroleum ether: 1/10) to afford the title compound (75% yield, 269 mg) as a white solid. mp: 119 °C. <sup>1</sup>H NMR (400 MHz, CDCl<sub>3</sub>) δ 8.87 (d, *J* = 8.2 Hz, 1H), 8.05 (d, *J* = 8.2 Hz, 1H), 7.93 (d, *J* = 7.1 Hz, 1H), 7.87 (d, *J* = 7.8 Hz, 1H), 7.65 – 7.50 (m, 4H), 7.43 (t, *J* = 7.6 Hz, 1H), 7.34 – 7.24 (m, 3H), 4.26 – 4.17 (m, 1H), 3.16 – 3.10 (m, 1H), 2.52 – 2.41 (m, 2H), 2.16 – 2.06 (m, 1H). <sup>13</sup>C NMR (125 MHz,

CDCl<sub>3</sub>)  $\delta$  164.6, 135.0, 134.0, 133.9, 132.1, 131.6, 131.4, 129.3, 128.8, 128.6, 127.8, 126.7, 125.5, 124.4, 124.3, 116.4, 76.8, 50.5, 33.3, 22.3. HRMS (ESI)  $m/z$ : [M + Na]<sup>+</sup> Calcd for C<sub>22</sub>H<sub>17</sub>NO<sub>2</sub>SNa 382.0872; Found 382.0862.

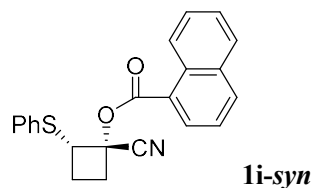

Purified by column chromatography (silica gel, EtOAc/Petroleum ether: 1/15) to afford the title compound (70% yield, 252 mg) as a white solid. mp: 120 °C. <sup>1</sup>H NMR (400 MHz, CDCl<sub>3</sub>)  $\delta$  9.00 (d,  $J$  = 8.6 Hz, 1H), 8.20 (d,  $J$  = 7.3 Hz, 1H), 8.07 (d,  $J$  = 8.2 Hz, 1H), 7.88 (d,  $J$  = 8.0 Hz, 1H), 7.68 – 7.58 (m, 1H), 7.58 – 7.51 (m, 1H), 7.50 – 7.39 (m, 3H), 7.27 – 7.21 (m, 2H), 7.33 – 7.27 (m, 1H), 4.66 – 4.48 (m, 1H), 3.03 – 2.88 (m, 1H), 2.88 – 2.73 (m, 1H), 2.77 – 2.62 (m, 1H), 2.33 – 2.14 (m, 1H). <sup>13</sup>C NMR (125 MHz, CDCl<sub>3</sub>)  $\delta$  164.8, 135.0, 134.4, 133.9, 131.8, 130.5, 129.3, 128.8, 128.5, 127.4, 126.7, 125.8, 124.6, 124.4, 118.5, 70.1, 51.5, 33.0, 24.2. HRMS (ESI)  $m/z$ : [M + Na]<sup>+</sup> Calcd for C<sub>22</sub>H<sub>17</sub>NO<sub>2</sub>SNa 382.0872; Found 382.0873.

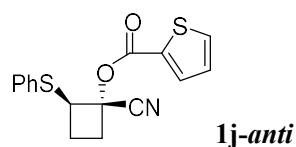

Purified by column chromatography (silica gel, EtOAc/Petroleum ether: 1/20) to afford the title compound (77% yield, 243 mg) as a yellow solid. mp: 100 °C. <sup>1</sup>H NMR (400 MHz, CDCl<sub>3</sub>)  $\delta$  7.89 (d,  $J$  = 3.8 Hz, 1H), 7.66 (d,  $J$  = 5.0 Hz, 1H), 7.44 – 7.31 (m, 5H), 7.19 – 7.14 (m, 1H), 4.15 – 4.00 (m, 1H), 3.11 – 2.95 (m, 1H), 2.69 – 2.47 (m, 1H), 2.45 – 2.37 (m, 2H). <sup>13</sup>C NMR (100 MHz, CDCl<sub>3</sub>)  $\delta$  159.9, 136.9, 135.1, 134.1, 131.8, 128.8, 128.3, 128.2, 127.5, 116.8, 75.2, 50.1, 33.1, 19.0. HRMS (ESI)  $m/z$ : [M + Na]<sup>+</sup> Calcd for C<sub>16</sub>H<sub>13</sub>NO<sub>2</sub>S<sub>2</sub>Na 338.0280; Found 338.0267.

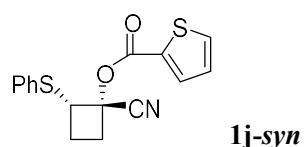

Purified by column chromatography (silica gel, EtOAc/Petroleum ether: 1/30) to afford the title compound (73% yield, 230 mg) as a yellow solid. mp: 107 °C. <sup>1</sup>H NMR (500 MHz, CDCl<sub>3</sub>)  $\delta$  7.73 (dd,  $J$  = 3.8, 1.3 Hz, 1H), 7.64 (dd,  $J$  = 4.9, 1.3 Hz, 1H), 7.58 – 7.51 (m, 2H), 7.35 (t,  $J$  = 7.5 Hz, 2H), 7.29 (t,  $J$  = 7.3 Hz, 1H), 7.12 (dd,  $J$  = 5.0, 3.8 Hz, 1H), 4.19 – 4.15 (m, 1H), 3.08 – 3.01 (m, 1H), 2.51 – 2.37 (m, 2H), 2.14 – 2.01 (m, 1H). <sup>13</sup>C NMR (125 MHz, CDCl<sub>3</sub>)  $\delta$  159.5, 135.2, 134.3, 134.1, 131.6, 131.3, 129.3, 128.3, 127.7, 116.1, 77.0, 50.3, 33.1, 22.1. HRMS (ESI)  $m/z$ : [M + Na]<sup>+</sup> Calcd for C<sub>16</sub>H<sub>13</sub>NO<sub>2</sub>S<sub>2</sub>Na 338.0280; Found 338.0271.

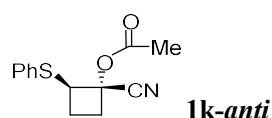

Purified by column chromatography (silica gel, EtOAc/Petroleum ether: 1/20) to afford the title compound (62% yield, 153 mg) as a light yellow liquid. <sup>1</sup>H NMR (500 MHz, CDCl<sub>3</sub>)  $\delta$  7.46 (d,  $J$  = 7.1 Hz, 2H), 7.31 (t,  $J$  = 7.3 Hz, 2H), 7.29 – 7.24 (m, 1H), 4.02 (t,  $J$  = 9.9 Hz, 1H), 3.01 – 2.88 (m, 1H), 2.49 – 2.37 (m, 1H), 2.34 – 2.21 (m, 1H),

2.08 (s, 3H), 2.08 – 1.97 (m, 1H).  $^{13}\text{C}$  NMR (125 MHz,  $\text{CDCl}_3$ )  $\delta$  168.4, 133.9, 131.6, 129.2, 127.6, 116.2, 76.1, 49.8, 32.9, 22.5, 20.7. HRMS (ESI)  $m/z$ :  $[\text{M} + \text{Na}]^+$  Calcd for  $\text{C}_{13}\text{H}_{13}\text{NO}_2\text{SNa}$  270.0559; Found 270.0554.

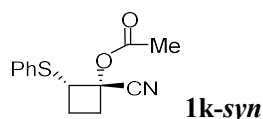

Purified by column chromatography (silica gel, EtOAc/Petroleum ether: 1/25) to afford the title compound (58% yield, 144 mg) as a colorless liquid.  $^1\text{H}$  NMR (500 MHz,  $\text{CDCl}_3$ )  $\delta$  7.43 (d,  $J = 7.1$  Hz, 2H), 7.34 (t,  $J = 7.4$  Hz, 2H), 7.28 – 7.25 (m, 1H), 4.39 – 4.36 (m, 1H), 2.82 – 2.72 (m, 1H), 2.66 – 2.55 (m, 2H), 2.19 (s, 3H), 2.17 – 2.08 (m, 1H).  $^{13}\text{C}$  NMR (125 MHz,  $\text{CDCl}_3$ )  $\delta$  168.7, 134.0, 131.2, 129.3, 127.7, 118.2, 69.9, 51.6, 32.6, 24.3, 20.7. HRMS (ESI)  $m/z$ :  $[\text{M} + \text{H}]^+$  Calcd for  $\text{C}_{13}\text{H}_{14}\text{NO}_2\text{S}$  248.0740; Found 248.0738.

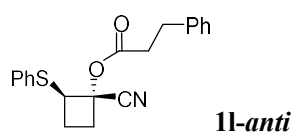

Purified by column chromatography (silica gel, EtOAc/Petroleum ether: 1/10) to afford the title compound (83% yield, 313 mg) as a white solid. mp: 84 °C.  $^1\text{H}$  NMR (400 MHz,  $\text{CDCl}_3$ )  $\delta$  7.46 – 7.43 (m, 2H), 7.35 – 7.23 (m, 5H), 7.26 – 7.17 (m, 1H), 7.16 (d,  $J = 8.4$  Hz, 2H), 3.98 – 3.88 (m, 1H), 2.95 – 2.87 (m, 3H), 2.66 – 2.60 (m, 2H), 2.42 – 2.29 (m, 1H), 2.17 – 2.09 (m, 1H), 2.05 – 1.88 (m, 1H).  $^{13}\text{C}$  NMR (100 MHz,  $\text{CDCl}_3$ )  $\delta$  170.4, 139.7, 133.9, 131.6, 129.2, 128.8, 128.4, 127.7, 126.7, 116.2, 76.2, 49.9, 35.5, 32.9, 30.7, 22.3. HRMS (ESI)  $m/z$ :  $[\text{M} + \text{Na}]^+$  Calcd for  $\text{C}_{20}\text{H}_{19}\text{NO}_2\text{SNa}$  360.1029; Found 360.1026.

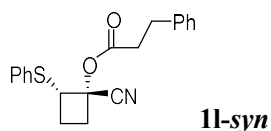

Purified by column chromatography (silica gel, EtOAc/Petroleum ether: 1/20) to afford the title compound (78% yield, 294 mg) as a white solid. mp: 89 °C.  $^1\text{H}$  NMR (400 MHz,  $\text{CDCl}_3$ )  $\delta$  7.39 – 7.35 (m, 2H), 7.33 – 7.24 (m, 5H), 7.24 – 7.17 (m, 3H), 4.37 – 4.31 (m, 1H), 2.95 (t,  $J = 7.8$  Hz, 2H), 2.76 – 2.67 (m, 3H), 2.58 – 2.41 (m, 2H), 2.11 – 1.99 (m, 1H).  $^{13}\text{C}$  NMR (100 MHz,  $\text{CDCl}_3$ )  $\delta$  170.7, 139.8, 134.1, 130.9, 129.2, 128.7, 128.4, 127.5, 126.6, 118.1, 69.9, 51.4, 35.5, 32.5, 30.6, 24.2. HRMS (ESI)  $m/z$ :  $[\text{M} + \text{Na}]^+$  Calcd for  $\text{C}_{20}\text{H}_{19}\text{NO}_2\text{SNa}$  360.1029; Found 360.1025.

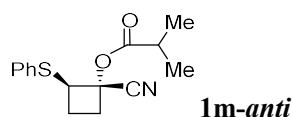

Purified by column chromatography (silica gel, EtOAc/Petroleum ether: 1/20) to afford the title compound (61% yield, 168 mg) as a light yellow liquid.  $^1\text{H}$  NMR (400 MHz,  $\text{CDCl}_3$ )  $\delta$  7.40 – 7.36 (m, 2H), 7.34 – 7.29 (m, 2H), 7.27 – 7.22 (m, 1H), 4.40 – 4.36 (m, 1H), 2.84 – 2.74 (m, 1H), 2.68 – 2.51 (m, 3H), 2.15 – 2.04 (m, 1H), 1.20 (d,  $J = 1.5$  Hz, 3H), 1.19 (d,  $J = 1.4$  Hz, 3H).  $^{13}\text{C}$  NMR (100 MHz,  $\text{CDCl}_3$ )  $\delta$  174.8, 134.3, 130.6, 129.2, 127.4, 118.3, 69.5, 51.4, 34.0, 32.7, 24.2, 18.7. HRMS (ESI)  $m/z$ :  $[\text{M} + \text{Na}]^+$  Calcd for  $\text{C}_{15}\text{H}_{17}\text{NO}_2\text{SNa}$  298.0872; Found 298.0875.

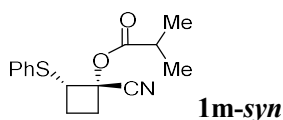

Purified by column chromatography (silica gel, EtOAc/Petroleum ether: 1/20) to afford the title compound (56% yield, 154 mg) as a yellow liquid.  $^1\text{H}$  NMR (500 MHz,  $\text{CDCl}_3$ )  $\delta$  7.48 (d,  $J = 7.0$  Hz, 2H), 7.31 (t,  $J = 7.3$  Hz, 2H), 7.28 – 7.24 (m, 1H), 4.03 (t,  $J = 9.9$  Hz, 1H), 2.98 – 2.93 (m, 1H), 2.57 – 2.50 (m, 1H), 2.44 – 2.37 (m, 1H), 2.27 – 2.18 (m, 1H), 2.07 – 1.98 (m, 1H), 1.15 (d,  $J = 3.6$  Hz, 3H), 1.13 (d,  $J = 3.6$  Hz, 3H).  $^{13}\text{C}$  NMR (100 MHz,  $\text{CDCl}_3$ )  $\delta$  174.4, 134.0, 131.5, 129.1, 127.6, 116.2, 76.2, 49.9, 33.7, 33.0, 22.1, 18.6, 18.4. HRMS (ESI)  $m/z$ :  $[\text{M} + \text{Na}]^+$  Calcd for  $\text{C}_{15}\text{H}_{17}\text{NO}_2\text{SNa}$  298.0872; Found 298.0871.

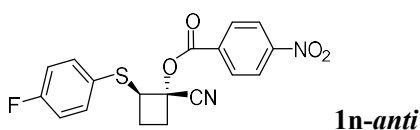

Purified by column chromatography (silica gel, EtOAc/Petroleum ether: 1/15) to afford the title compound (76% yield, 283 mg) as a white solid. mp: 128 °C.  $^1\text{H}$  NMR (400 MHz,  $\text{CDCl}_3$ )  $\delta$  8.28 (d,  $J = 8.9$  Hz, 2H), 7.98 (d,  $J = 8.9$  Hz, 2H), 7.66 – 7.57 (m, 2H), 7.09 (d,  $J = 8.6$  Hz, 2H), 4.15 – 4.06 (m, 1H), 3.13 – 3.03 (m, 1H), 2.53 – 2.35 (m, 2H), 2.17 – 2.00 (m, 1H).  $^{13}\text{C}$  NMR (100 MHz,  $\text{CDCl}_3$ )  $\delta$  163.1 (d,  $J = 249.4$  Hz), 162.2, 151.2, 135.9 (d,  $J = 8.3$  Hz), 133.5, 131.1, 123.9, 128.2 (d,  $J = 3.1$  Hz), 116.5 (d,  $J = 21.9$  Hz), 115.8, 77.3, 51.3, 33.0, 22.1. HRMS (ESI)  $m/z$ :  $[\text{M} + \text{Na}]^+$  Calcd for  $\text{C}_{18}\text{H}_{13}\text{FN}_2\text{O}_4\text{SNa}$  395.0472; Found 395.0475.

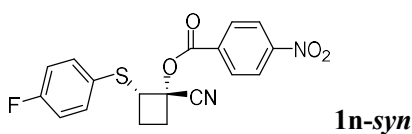

Purified by column chromatography (silica gel, EtOAc/Petroleum ether: 1/20) to afford the title compound (78% yield, 290 mg) as a white solid. mp: 132 °C.  $^1\text{H}$  NMR (400 MHz,  $\text{CDCl}_3$ )  $\delta$  8.32 (d,  $J = 8.9$  Hz, 2H), 8.20 (d,  $J = 8.9$  Hz, 2H), 7.46 – 7.37 (m, 2H), 7.06 – 6.99 (m, 2H), 4.50 – 4.42 (m, 1H), 2.97 – 2.87 (m, 1H), 2.80 – 2.61 (m, 2H), 2.28 – 2.16 (m, 1H).  $^{13}\text{C}$  NMR (100 MHz,  $\text{CDCl}_3$ )  $\delta$  162.6 (d,  $J = 248.5$  Hz), 162.5, 151.2, 133.8, 133.4 (d,  $J = 8.2$  Hz), 131.3, 128.8 (d,  $J = 3.5$  Hz), 123.9, 117.5, 116.6 (d,  $J = 22.1$  Hz), 70.7, 52.3, 32.5, 24.1. HRMS (ESI)  $m/z$ :  $[\text{M} + \text{Na}]^+$  Calcd for  $\text{C}_{18}\text{H}_{13}\text{FN}_2\text{O}_4\text{SNa}$  395.0472; Found 395.0476.

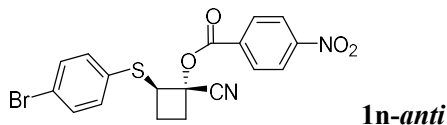

Purified by column chromatography (silica gel, EtOAc/Petroleum ether: 1/5) to afford the title compound (86% yield, 373 mg) as a white solid. mp: 145 °C.  $^1\text{H}$  NMR (400 MHz,  $\text{CDCl}_3$ )  $\delta$  8.30 (d,  $J = 8.4$  Hz, 2H), 7.99 (d,  $J = 8.4$  Hz, 2H), 7.51 – 7.43 (m, 4H), 4.23 – 4.15 (m, 1H), 3.16 – 3.05 (m, 1H), 2.57 – 2.39 (m, 2H), 2.21 – 2.03 (m, 1H).  $^{13}\text{C}$  NMR (125 MHz,  $\text{CDCl}_3$ )  $\delta$  162.1, 151.1, 134.1, 133.4, 132.5, 132.4, 131.0, 123.8, 122.4, 115.6, 77.1, 50.4, 33.0, 22.0. HRMS (ESI)  $m/z$ :  $[\text{M} + \text{Na}]^+$  Calcd for  $\text{C}_{18}\text{H}_{13}\text{BrN}_2\text{O}_4\text{SNa}$  454.9672; Found 454.9676.

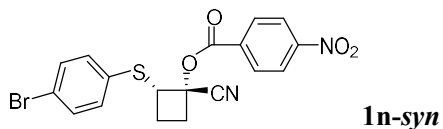

Purified by column chromatography (silica gel, EtOAc/Petroleum ether: 1/8) to afford the title compound (74% yield, 321 mg) as a white solid. mp: 139 °C. <sup>1</sup>H NMR (400 MHz, CDCl<sub>3</sub>) δ 8.30 (d, *J* = 8.9 Hz, 2H), 8.12 (d, *J* = 8.9 Hz, 2H), 7.45 (d, *J* = 8.5 Hz, 2H), 7.26 (d, *J* = 8.6 Hz, 2H), 4.58 – 4.49 (m, 1H), 3.02 – 2.84 (m, 1H), 2.83 – 2.65 (m, 2H), 2.32 – 2.14 (m, 1H). <sup>13</sup>C NMR (125 MHz, CDCl<sub>3</sub>) δ 162.5, 151.2, 133.7, 133.3, 132.5, 131.7, 131.3, 123.9, 121.6, 117.6, 70.6, 51.2, 32.7, 23.9. HRMS (ESI) *m/z*: [M + Na]<sup>+</sup> Calcd for C<sub>18</sub>H<sub>13</sub>BrN<sub>2</sub>O<sub>4</sub>SNa 454.9672; Found 454.9667.

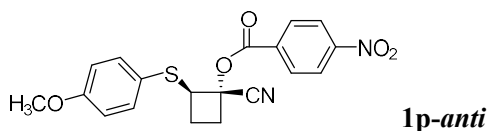

Purified by column chromatography (silica gel, EtOAc/Petroleum ether: 1/10) to afford the title compound (87% yield, 334 mg) as a yellow oil. <sup>1</sup>H NMR (400 MHz, CDCl<sub>3</sub>) δ 8.33 (d, *J* = 8.8 Hz, 2H), 8.23 (d, *J* = 8.8 Hz, 2H), 7.37 (d, *J* = 8.7 Hz, 2H), 6.85 (d, *J* = 8.7 Hz, 2H), 4.47 – 4.38 (m, 1H), 3.80 (s, 3H), 2.94 – 2.86 (m, 1H), 2.75 – 2.56 (m, 2H), 2.33 – 2.12 (m, 1H). <sup>13</sup>C NMR (125 MHz, CDCl<sub>3</sub>) δ 162.5, 160.0, 151.2, 134.1, 134.0, 131.4, 123.9, 123.7, 117.7, 115.0, 70.8, 55.5, 52.8, 32.5, 24.0. HRMS (ESI) *m/z*: [M + Na]<sup>+</sup> Calcd for C<sub>19</sub>H<sub>16</sub>N<sub>2</sub>O<sub>5</sub>SNa 407.0672; Found 407.0665.

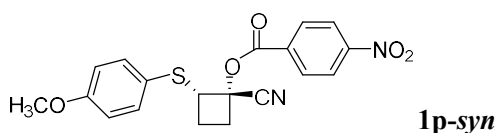

Purified by column chromatography (silica gel, EtOAc/Petroleum ether: 1/15) to afford the title compound (70% yield, 261 mg) as a yellow oil. <sup>1</sup>H NMR (500 MHz, CDCl<sub>3</sub>) δ 8.28 (d, *J* = 8.9 Hz, 2H), 7.97 (d, *J* = 8.9 Hz, 2H), 7.60 (d, *J* = 8.7 Hz, 2H), 6.92 (d, *J* = 8.7 Hz, 2H), δ 4.11 – 4.03 (m, 1H), 3.85 (s, 3H), 3.12 – 3.04 (m, 1H), 2.49 – 2.35 (m, 2H), 2.14 – 2.08 (m, 1H). <sup>13</sup>C NMR (100 MHz, CDCl<sub>3</sub>) δ 162.3, 160.4, 151.2, 136.1, 133.7, 131.2, 123.8, 123.4, 116.0, 114.9, 77.5, 55.6, 51.8, 33.1, 22.0. HRMS (ESI) *m/z*: [M + Na]<sup>+</sup> Calcd for C<sub>19</sub>H<sub>16</sub>N<sub>2</sub>O<sub>5</sub>SNa 407.0672; Found 407.0669.

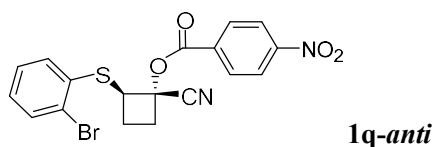

Purified by column chromatography (silica gel, EtOAc/Petroleum ether: 1/8) to afford the title compound (65% yield, 282 mg) as a yellow solid. mp: 225 °C. <sup>1</sup>H NMR (400 MHz, CDCl<sub>3</sub>) δ 8.29 (d, *J* = 8.4 Hz, 2H), 8.02 (d, *J* = 8.4 Hz, 2H), 7.77 – 7.64 (m, 2H), 7.34 – 7.27 (m, 1H), 7.25 – 7.16 (m, 1H), 4.33 (t, *J* = 9.7 Hz, 1H), 3.18 – 3.07 (m, 1H), 2.61 – 2.41 (m, 2H), 2.24 – 2.11 (m, 1H). <sup>13</sup>C NMR (100 MHz, CDCl<sub>3</sub>) δ 162.2, 151.2, 134.7, 134.0, 133.7, 133.6, 131.2, 129.5, 128.1, 127.0, 123.9, 115.7, 49.1, 33.3, 29.9, 22.1. HRMS (ESI) *m/z*: [M + Na]<sup>+</sup> Calcd for C<sub>18</sub>H<sub>13</sub>BrN<sub>2</sub>O<sub>4</sub>SNa 454.9672; Found 454.9668.

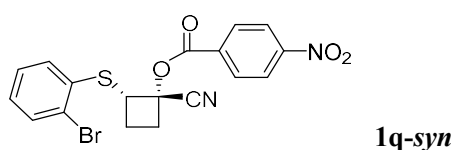

Purified by column chromatography (silica gel, EtOAc/Petroleum ether: 1/8) to afford the title compound (80% yield, 347 mg) as a yellow solid. mp: 188 °C. <sup>1</sup>H NMR (400 MHz, CDCl<sub>3</sub>) δ 8.24 (d, *J* = 8.8 Hz, 2H), 8.01 (d, *J* = 8.8 Hz, 2H), 7.60 (d, *J* = 6.7 Hz, 1H), 7.39 – 7.28 (m, 2H), 7.17 – 7.08 (m, 1H), 4.70 – 4.62 (m, 1H), 3.09 – 2.95 (m, 1H), 2.90 – 2.71 (m, 2H), 2.33 – 2.19 (m, 1H). <sup>13</sup>C NMR (100 MHz, CDCl<sub>3</sub>) δ 162.4, 151.2, 136.0, 133.7, 133.4, 131.3, 129.3, 128.4, 128.0, 123.9, 123.3, 117.7, 70.1, 49.7, 33.1, 23.0. HRMS (ESI) *m/z*: [M + Na]<sup>+</sup> Calcd for C<sub>18</sub>H<sub>13</sub>BrN<sub>2</sub>O<sub>4</sub>SNa 454.9672; Found 454.9679.

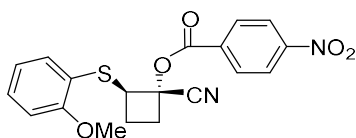

**1r-anti**

Purified by column chromatography (silica gel, EtOAc/Petroleum ether: 1/8) to afford the title compound (74% yield, 284 mg) as a yellow solid. mp: 132 °C. <sup>1</sup>H NMR (400 MHz, CDCl<sub>3</sub>) δ 8.26 (d, *J* = 8.8 Hz, 2H), 7.95 (d, *J* = 8.8 Hz, 2H), 7.62 (d, *J* = 7.9 Hz, 1H), 7.41 – 7.32 (m, 1H), 7.00 – 6.93 (m, 2H), 4.35 – 4.24 (m, 1H), 3.91 (s, 3H), 3.15 – 3.03 (m, 1H), 2.54 – 2.36 (m, 2H), 2.16 – 2.04 (m, 1H). <sup>13</sup>C NMR (100 MHz, CDCl<sub>3</sub>) δ 162.2, 158.8, 151.1, 134.6, 133.7, 131.1, 130.0, 123.8, 121.3, 121.1, 115.8, 111.1, 77.4, 56.0, 48.5, 33.3, 22.1. HRMS (ESI) *m/z*: [M + Na]<sup>+</sup> Calcd for C<sub>19</sub>H<sub>16</sub>N<sub>2</sub>O<sub>5</sub>SNa 407.0672 ; Found 407.0666.

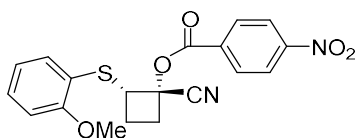

**1r-syn**

Purified by column chromatography (silica gel, EtOAc/Petroleum ether: 1/8) to afford the title compound (80% yield, 307 mg) as a yellow solid. mp: 125 °C. <sup>1</sup>H NMR (400 MHz, CDCl<sub>3</sub>) δ 8.25 (d, *J* = 8.8 Hz, 2H), 8.06 (d, *J* = 8.9 Hz, 2H), 7.35 – 7.25 (m, 2H), 6.93 – 6.88 (m, 2H), 4.72 – 4.60 (m, 1H), 3.90 (s, 3H), 3.01 – 2.90 (m, 1H), 2.87 – 2.75 (m, 1H), 2.75 – 2.62 (m, 1H), 2.25 – 2.11 (m, 1H). <sup>13</sup>C NMR (100 MHz, CDCl<sub>3</sub>) δ 162.5, 157.9, 151.1, 133.9, 131.4, 131.3, 129.0, 123.8, 122.0, 121.3, 117.9, 111.0, 70.7, 55.9, 49.5, 33.0, 23.7. HRMS (ESI) *m/z*: [M + Na]<sup>+</sup> Calcd for C<sub>19</sub>H<sub>16</sub>N<sub>2</sub>O<sub>5</sub>SNa 407.0672; Found 407.0669.

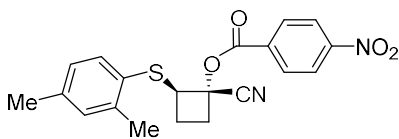

**1s-anti**

Purified by column chromatography (silica gel, EtOAc/Petroleum ether: 1/8) to afford the title compound (85% yield, 327 mg) as a yellow solid. mp: 156 °C. <sup>1</sup>H NMR (500 MHz, CDCl<sub>3</sub>) δ 8.27 (d, *J* = 8.9 Hz, 2H), 7.99 (d, *J* = 8.9 Hz, 2H), 7.49 (d, *J* = 7.9 Hz, 1H), 7.10 (s, 1H), 7.01 (d, *J* = 7.9 Hz, 1H), 4.13 – 4.07 (m, 1H), 3.13 – 3.02 (m, 1H), 2.48 (s, 3H), 2.47 – 2.36 (m, 2H), 2.34 (s, 3H), 2.18 – 2.07 (m, 1H). <sup>13</sup>C NMR (125 MHz, CDCl<sub>3</sub>) δ 162.3, 151.2, 140.0, 138.4, 133.7, 133.4, 131.6, 131.2, 129.4, 127.4, 123.8, 115.9, 77.4, 50.4, 33.2, 22.4, 21.2, 20.9. HRMS (ESI) *m/z*: [M + Na]<sup>+</sup> Calcd for C<sub>20</sub>H<sub>18</sub>N<sub>2</sub>O<sub>4</sub>SNa 405.0879; Found 405.0873.

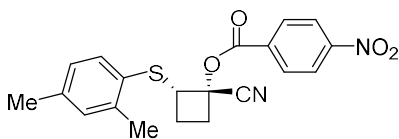

**1s-syn**

Purified by column chromatography (silica gel, EtOAc/Petroleum ether: 1/8) to afford the title compound (60% yield, 231 mg) as a yellow solid. mp: 174 °C. <sup>1</sup>H NMR (500 MHz, CDCl<sub>3</sub>) δ 8.26 (d, *J* = 8.6 Hz, 2H), 8.09 (d, *J* = 8.5 Hz, 2H), 7.25 (d, *J* = 7.7 Hz, 1H), 7.03 (s, 1H), 6.98 (d, *J* = 7.9 Hz, 1H), δ 4.50 – 4.44 (m, 1H), 2.98 – 2.88 (m, 1H), 2.84 – 2.74 (m, 1H), 2.72 – 2.63 (m, 1H), 2.36 (s, 3H), 2.30 (s, 3H), 2.25 – 2.15 (m, 1H). <sup>13</sup>C NMR (125 MHz, CDCl<sub>3</sub>) δ 162.5, 151.1, 138.4, 137.6, 133.9, 131.5, 131.3, 130.9, 129.6, 127.7, 123.8, 117.7, 70.6, 50.8, 32.8, 23.9, 21.0, 20.6. HRMS (ESI) *m/z*: [M + Na]<sup>+</sup> Calcd for C<sub>20</sub>H<sub>18</sub>N<sub>2</sub>O<sub>4</sub>SNa 405.0879; Found 405.0880.

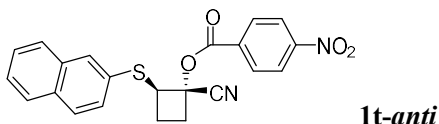

Purified by column chromatography (silica gel, EtOAc/Petroleum ether: 1/10) to afford the title compound (75% yield, 287 mg) as a yellow solid. mp: 122 °C. <sup>1</sup>H NMR (400 MHz, CDCl<sub>3</sub>) δ 8.12 – 8.09 (m, 2H), 8.09 (s, 1H), 7.89 – 7.76 (m, 5H), 7.63 (dd, *J* = 8.5, 1.9 Hz, 1H), 7.60 – 7.49 (m, 2H), 4.34 – 4.24 (m, 1H), 3.16 – 3.06 (m, 1H), 2.58 – 2.38 (m, 2H), 2.27 – 2.10 (m, 1H). <sup>13</sup>C NMR (125 MHz, CDCl<sub>3</sub>) δ 162.2, 151.1, 133.8, 133.5, 132.8, 131.9, 131.1, 130.7, 129.9, 129.0, 127.9, 127.6, 127.1, 127.0, 123.8, 115.8, 77.6, 50.8, 33.3, 22.2. HRMS (ESI) *m/z*: [M + H]<sup>+</sup> Calcd for C<sub>22</sub>H<sub>17</sub>N<sub>2</sub>O<sub>4</sub>S 405.0904; Found 405.0899.

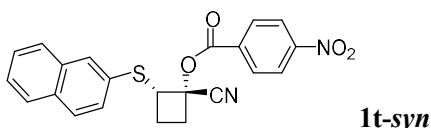

Purified by column chromatography (silica gel, EtOAc/Petroleum ether: 1/15) to afford the title compound (72% yield, 275 mg) as a yellow solid. mp: 106 °C. <sup>1</sup>H NMR (500 MHz, CDCl<sub>3</sub>) δ 8.12 (d, *J* = 8.8 Hz, 2H), 7.99 – 7.94 (m, 2H), 7.84 – 7.77 (m, 3H), 7.71 – 7.66 (m, 1H), 7.51 – 7.43 (m, 3H), 4.74 – 4.67 (m, 1H), 3.02 – 2.92 (m, 1H), 2.87 – 2.69 (m, 2H), 2.28 – 2.17 (m, 1H). <sup>13</sup>C NMR (125 MHz, CDCl<sub>3</sub>) δ 162.5, 151.1, 133.7, 132.3, 131.4, 131.2, 129.1, 128.9, 127.9, 127.4, 127.3, 127.1, 126.6, 123.7, 117.8, 70.7, 51.0, 33.0, 23.5. HRMS (ESI) *m/z*: [M + Na]<sup>+</sup> Calcd for C<sub>22</sub>H<sub>16</sub>N<sub>2</sub>O<sub>4</sub>SNa 427.0723; Found 427.0722.

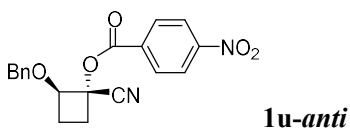

Purified by column chromatography (silica gel, EtOAc/Petroleum ether: 1/10) to afford the title compound (67% yield, 236 mg) as a white solid. mp: 136 °C. <sup>1</sup>H NMR (400 MHz, CDCl<sub>3</sub>) δ 8.30 (d, *J* = 8.9 Hz, 2H), 8.21 (d, *J* = 8.9 Hz, 2H), 7.37 – 7.27 (m, 5H), 4.75 (d, *J* = 11.6 Hz, 1H), 4.62 (d, *J* = 11.6 Hz, 1H), 4.57 – 4.48 (m, 1H), 2.60 – 2.50 (m, 2H), 2.50 – 2.31 (m, 2H). <sup>13</sup>C NMR (100 MHz, CDCl<sub>3</sub>) δ 163.0, 151.1, 136.8, 134.1, 131.2, 128.7, 128.3, 128.0, 123.9, 117.5, 77.1, 72.8, 71.9, 27.6, 27.0. HRMS (ESI) *m/z*: [M + Na]<sup>+</sup> Calcd for C<sub>19</sub>H<sub>16</sub>N<sub>2</sub>O<sub>5</sub>Na 375.0951; Found 35.0955.

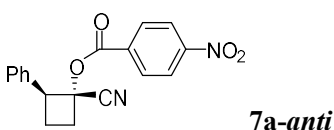

Purified by column chromatography (silica gel, EtOAc/Petroleum ether: 1/15) to afford the title compound (40% yield, 128 mg) as a white solid. mp: 188 °C. <sup>1</sup>H NMR (500 MHz, CDCl<sub>3</sub>) δ 8.34 (d, *J* = 9.0 Hz, 2H), 8.25 (d, *J* = 8.9 Hz, 2H), 7.43 (t, *J* = 7.5 Hz, 2H), 7.40 – 7.33 (m, 3H), 4.12 – 4.08 (m, 1H), 3.11 – 3.03 (m, 1H), 2.63 – 2.50 (m, 1H), 2.48 – 2.42 (m, 2H). <sup>13</sup>C NMR (125 MHz, CDCl<sub>3</sub>) δ 162.6, 151.2, 136.6, 133.9, 131.2, 128.9, 128.4, 127.5, 123.9, 116.4, 75.8, 50.2, 33.0, 19.0. HRMS (ESI) *m/z*: [M + Na]<sup>+</sup> Calcd for C<sub>18</sub>H<sub>14</sub>N<sub>2</sub>O<sub>4</sub>Na 345.0846; Found 345.0853.

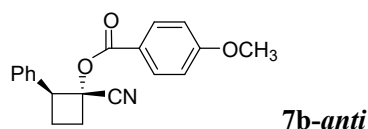

Purified by column chromatography (silica gel, EtOAc/Petroleum ether: 1/15) to afford the title compound (54% yield, 166 mg) as a colorless oil. <sup>1</sup>H NMR (500 MHz, CDCl<sub>3</sub>) δ 8.02 (d, *J* = 8.9 Hz, 2H), 7.45 – 7.36 (m, 4H), 7.33 (t, *J* = 7.1 Hz, 1H), 6.96 (d, *J* = 8.8 Hz, 2H), 4.08 – 4.04 (m, 1H), 3.87 (s, 3H), 3.06 – 2.98 (m, 1H), 2.54 – 2.43 (m, 1H), 2.43 – 2.33 (m, 2H). <sup>13</sup>C NMR (125 MHz, CDCl<sub>3</sub>) δ 164.2, 164.1, 137.1, 132.2, 128.7, 128.0, 127.5, 120.8, 117.1, 114.0, 74.8, 55.7, 50.0, 33.1, 19.0. HRMS (ESI) *m/z*: [M + Na]<sup>+</sup> Calcd for C<sub>19</sub>H<sub>17</sub>NO<sub>3</sub>Na 330.1101; Found 330.1102.

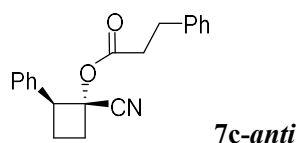

Purified by column chromatography (silica gel, EtOAc/Petroleum ether: 1/15) to afford the title compound (70% yield, 214 mg) as a solid. mp: 76 °C. <sup>1</sup>H NMR (400 MHz, CDCl<sub>3</sub>) δ 7.36 (t, *J* = 7.4 Hz, 2H), 7.32-7.27 (m, 3H), 7.25 – 7.19 (m, 5H), 3.84 – 3.74 (m, 1H), 2.97 (t, *J* = 7.7 Hz, 2H), 2.93 – 2.75 (m, 1H), 2.70 (t, *J* = 7.7 Hz, 2H), 2.39 – 2.15 (m, 3H). <sup>13</sup>C NMR (100 MHz, CDCl<sub>3</sub>) δ 170.7, 139.8, 136.9, 128.7, 128.6, 128.4, 128.0, 127.4, 126.6, 116.8, 74.5, 49.8, 35.4, 32.8, 30.7, 18.8. HRMS (ESI) *m/z*: [M + Na]<sup>+</sup> Calcd for C<sub>20</sub>H<sub>19</sub>NO<sub>2</sub>Na 328.1308; Found 328.1300.

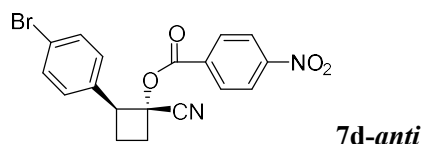

Purified by column chromatography (silica gel, EtOAc/Petroleum ether: 1/15) to afford the title compound (81% yield, 324 mg) as a white solid. mp: 186 °C. <sup>1</sup>H NMR (400 MHz, CDCl<sub>3</sub>) δ 8.33 (d, *J* = 8.9 Hz, 2H), 8.23 (d, *J* = 8.9 Hz, 2H), 7.55 (d, *J* = 8.5 Hz, 2H), 7.26 (d, *J* = 8.5 Hz, 2H), 4.07 – 4.02 (m, 1H), 3.10 – 3.00 (m, 1H), 2.63 – 2.43 (m, 1H), 2.46 – 2.33 (m, 2H). <sup>13</sup>C NMR (100 MHz, CDCl<sub>3</sub>) δ 162.5, 151.2, 135.6, 133.8, 132.0, 131.2, 129.2, 123.9, 122.4, 116.3, 75.4, 49.7, 32.8, 19.0. HRMS (ESI) *m/z*: [M + Na]<sup>+</sup> Calcd for C<sub>18</sub>H<sub>13</sub>BrN<sub>2</sub>O<sub>4</sub>Na 422.9951; Found 422.9947.

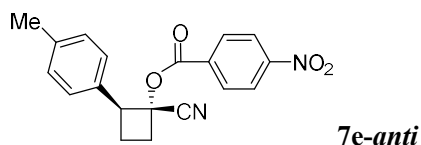

Purified by column chromatography (silica gel, EtOAc/Petroleum ether: 1/10) to afford the title compound (89% yield, 299 mg) as a yellow solid. mp: 160 °C. <sup>1</sup>H NMR (400 MHz, CDCl<sub>3</sub>) δ 8.36 (d, *J* = 8.8 Hz, 2H), 8.26 (d, *J* =



8.8 Hz, 2H), 7.30 (d,  $J = 8.1$  Hz, 2H), 7.26 (d,  $J = 8.2$  Hz, 2H), 4.08 – 4.05 (m, 1H), 3.12 – 3.02 (m, 1H), 2.61 – 2.52 (m, 1H), 2.48 – 2.39 (m, 2H), 2.40 (s, 3H).  $^{13}\text{C}$  NMR (100 MHz,  $\text{CDCl}_3$ )  $\delta$  162.6, 151.2, 138.1, 134.0, 133.5, 131.2, 129.6, 127.4, 123.9, 116.5, 75.9, 50.0, 32.9, 21.3, 19.1. HRMS (ESI)  $m/z$ :  $[\text{M} + \text{Na}]^+$  Calcd for  $\text{C}_{19}\text{H}_{16}\text{N}_2\text{O}_4\text{Na}$  359.1002; Found 359.1001.

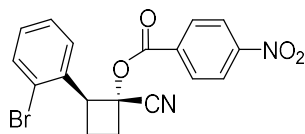

**7f-anti**

Purified by column chromatography (silica gel, EtOAc/Petroleum ether: 1/15) to afford the title compound (75% yield, 301 mg) as a white solid. mp: 188 °C.  $^1\text{H}$  NMR (400 MHz,  $\text{CDCl}_3$ )  $\delta$  8.33 (d,  $J = 8.9$  Hz, 2H), 8.27 (d,  $J = 8.9$  Hz, 2H), 7.66 (dd,  $J = 8.0, 1.3$  Hz, 1H), 7.58 (dd,  $J = 7.9, 1.7$  Hz, 1H), 7.49 – 7.42 (m, 1H), 7.29 – 7.19 (m, 1H), 4.64 – 4.59 (m, 1H), 3.07 – 3.00 (m, 1H), 2.62 – 2.45 (m, 2H), 2.45 – 2.32 (m, 1H).  $^{13}\text{C}$  NMR (100 MHz,  $\text{CDCl}_3$ )  $\delta$  162.7, 151.2, 135.3, 133.9, 133.3, 131.4, 130.1, 129.6, 128.0, 125.0, 123.9, 116.2, 76.0, 48.9, 32.6, 19.0. HRMS (ESI)  $m/z$ :  $[\text{M} + \text{H}]^+$  Calcd for  $\text{C}_{18}\text{H}_{14}\text{BrN}_2\text{O}_4$  401.0131 ; Found 401.0125.

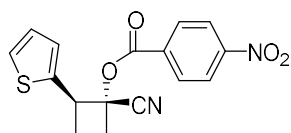

**7g-anti**

Purified by column chromatography (silica gel, EtOAc/Petroleum ether: 1/20) to afford the title compound (92% yield, 301 mg) as a yellow solid. mp: 164 °C.  $^1\text{H}$  NMR (500 MHz,  $\text{CDCl}_3$ )  $\delta$  8.34 (d,  $J = 8.9$  Hz, 2H), 8.24 (d,  $J = 8.8$  Hz, 2H), 7.33 (dd,  $J = 5.0, 1.2$  Hz, 1H), 7.19 – 7.14 (m, 1H), 7.09 (dd,  $J = 5.1, 3.5$  Hz, 1H), 4.25 – 4.19 (m, 1H), 3.07 – 3.03 (m, 1H), 2.59 – 2.49 (m, 2H), 2.49 – 2.41 (m, 1H).  $^{13}\text{C}$  NMR (125 MHz,  $\text{CDCl}_3$ )  $\delta$  162.6, 151.2, 139.1, 133.8, 131.3, 127.5, 126.3, 125.7, 123.9, 116.1, 76.2, 45.8, 32.7, 21.6. HRMS (ESI)  $m/z$ :  $[\text{M} + \text{H}]^+$  Calcd for  $\text{C}_{16}\text{H}_{13}\text{N}_2\text{O}_4\text{S}$  329.0591 ; Found 329.0586.

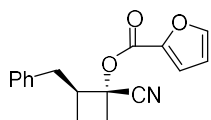

**7h-anti**

Purified by column chromatography (silica gel, EtOAc/Petroleum ether: 1/15) to afford the title compound (79% yield, 222 mg) as a yellow oil.  $^1\text{H}$  NMR (400 MHz,  $\text{CDCl}_3$ )  $\delta$  7.62 (d,  $J = 1.7$  Hz, 1H), 7.34 – 7.27 (m, 2H), 7.25 – 7.20 (m, 3H), 7.16 (dd,  $J = 3.6, 0.8$  Hz, 1H), 6.54 (dd,  $J = 3.5, 1.8$  Hz, 1H), 3.41 – 3.29 (m, 1H), 3.04 – 2.85 (m, 3H), 2.45 – 2.33 (m, 1H), 2.14 – 2.01 (m, 1H), 1.88 – 1.75 (m, 1H).  $^{13}\text{C}$  NMR (125 MHz,  $\text{CDCl}_3$ )  $\delta$  156.3, 147.5, 143.3, 138.3, 128.9, 128.7, 126.6, 119.8, 117.1, 112.3, 73.3, 46.9, 38.2, 32.4, 20.5. HRMS (ESI)  $m/z$ :  $[\text{M} + \text{Na}]^+$  Calcd for  $\text{C}_{17}\text{H}_{15}\text{NO}_3\text{Na}$  304.0944; Found 304.1948.

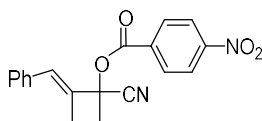

**9a**

Purified by column chromatography (silica gel, EtOAc/Petroleum ether: 1/10) to afford the title compound (88% yield, 294 mg) as a yellow solid. mp: 147 °C.  $^1\text{H}$  NMR (400 MHz,  $\text{CDCl}_3$ )  $\delta$  8.34 (d,  $J = 8.9$  Hz, 2H), 8.26 (d,  $J = 8.6$

Hz, 2H), 7.44 – 7.30 (m, 5H), 7.01 (s, 1H), 3.35 – 3.20 (m, 1H), 3.23 – 3.09 (m, 2H), 2.86 – 2.73 (m, 1H). <sup>13</sup>C NMR (125 MHz, CDCl<sub>3</sub>) δ 163.1, 151.2, 134.9, 134.1, 133.9, 131.3, 130.5, 129.0, 128.9, 128.7, 123.9, 116.7, 73.1, 33.4, 27.8. HRMS (ESI) m/z: [M + Na]<sup>+</sup> Calcd for C<sub>19</sub>H<sub>14</sub>N<sub>2</sub>O<sub>4</sub>Na 357.0846; Found 357.0851.

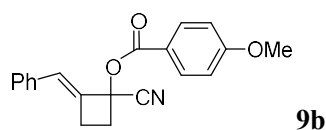

Purified by column chromatography (silica gel, EtOAc/Petroleum ether: 1/20) to afford the title compound (65% yield, 145 mg) as a colorless oil. <sup>1</sup>H NMR (400 MHz, CDCl<sub>3</sub>) δ 8.03 (d, *J* = 8.9 Hz, 2H), 7.42 – 7.28 (m, 5H), 6.98 – 6.95 (m, 2H), 6.94 (s, 1H), 3.87 (s, 3H), 3.28 – 3.06 (m, 3H), 2.81 – 2.67 (m, 1H). <sup>13</sup>C NMR (100 MHz, CDCl<sub>3</sub>) δ 164.6, 164.2, 135.2, 134.9, 132.3, 129.5, 128.8, 128.6, 128.5, 120.9, 117.5, 114.0, 71.9, 55.6, 33.6, 27.6. HRMS (ESI) m/z: [M + Na]<sup>+</sup> Calcd for C<sub>20</sub>H<sub>17</sub>NO<sub>3</sub>Na 342.1101; Found 342.1096.

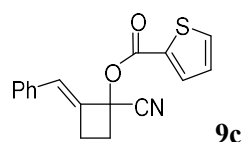

Purified by column chromatography (silica gel, EtOAc/Petroleum ether: 1/15) to afford the title compound (81% yield, 239 mg) as a yellow solid. mp: 101 °C. <sup>1</sup>H NMR (400 MHz, CDCl<sub>3</sub>) δ 7.89 (dd, *J* = 3.9, 1.3 Hz, 1H), 7.65 (dd, *J* = 5.0, 1.3 Hz, 1H), 7.41 – 7.28 (m, 5H), 7.15 (dd, *J* = 5.0, 3.8 Hz, 1H), 6.97 (t, *J* = 2.6 Hz, 1H), 3.32 – 3.21 (m, 1H), 3.21 – 3.03 (m, 2H), 2.85 – 2.71 (m, 1H). <sup>13</sup>C NMR (100 MHz, CDCl<sub>3</sub>) δ 160.4, 135.1, 135.0, 134.5, 134.1, 131.9, 130.0, 128.9, 128.6, 128.6, 128.2, 117.1, 72.4, 33.5, 27.7. HRMS (ESI) m/z: [M + Na]<sup>+</sup> Calcd for C<sub>17</sub>H<sub>13</sub>NO<sub>2</sub>SNa 318.0559; Found 318.0554.

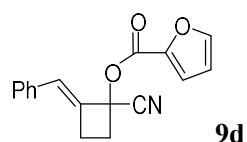

Purified by column chromatography (silica gel, EtOAc/Petroleum ether: 1/20) to afford the title compound (76% yield, 212 mg) as a yellow solid. mp: 94 °C. <sup>1</sup>H NMR (500 MHz, CDCl<sub>3</sub>) δ 7.64 (d, *J* = 1.7 Hz, 1H), 7.42 – 7.34 (m, 2H), 7.34 – 7.28 (m, 4H), 6.98 (d, *J* = 2.9 Hz, 1H), 6.56 (dd, *J* = 3.6, 1.7 Hz, 1H), 3.29 – 3.19 (m, 1H), 3.18 – 3.04 (m, 2H), 2.81 – 2.69 (m, 1H). <sup>13</sup>C NMR (125 MHz, CDCl<sub>3</sub>) δ 156.7, 147.5, 143.2, 135.0, 134.2, 130.2, 128.8, 128.6, 120.0, 116.9, 112.4, 72.3, 33.4, 27.6. HRMS (ESI) m/z: [M + Na]<sup>+</sup> Calcd for C<sub>17</sub>H<sub>13</sub>NO<sub>3</sub>Na 302.0788; Found 302.0792.

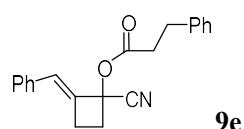

Purified by column chromatography (silica gel, EtOAc/Petroleum ether: 1/10) to afford the title compound (96% yield, 305 mg) as a colorless oil. <sup>1</sup>H NMR (400 MHz, CDCl<sub>3</sub>) δ 7.39 – 7.34 (m, 2H), 7.33 – 7.25 (m, 5H), 7.25 – 7.17 (m, 3H), 6.80 (t, *J* = 2.7 Hz, 1H), 3.18 – 3.05 (m, 2H), 3.04 – 2.89 (m, 3H), 2.74 (t, *J* = 7.7 Hz, 2H), 2.57 – 2.44 (m,

1H), <sup>13</sup>C NMR (100 MHz, CDCl<sub>3</sub>) δ 171.3, 139.9, 135.1, 134.6, 129.6, 128.8, 128.7, 128.6, 128.5, 128.4, 126.6, 117.1, 71.8, 35.7, 33.4, 30.8, 27.6. HRMS (ESI) m/z: [M + Na]<sup>+</sup> Calcd for C<sub>21</sub>H<sub>19</sub>NO<sub>2</sub>Na 340.1308; Found 340.1304.

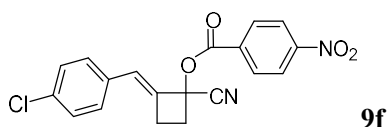

Purified by column chromatography (silica gel, EtOAc/Petroleum ether: 1/8) to afford the title compound (82% yield, 302 mg) as a yellow solid. mp: 146 °C. <sup>1</sup>H NMR (500 MHz, CDCl<sub>3</sub>) δ 8.33 (d, *J* = 8.8 Hz, 2H), 8.26 (d, *J* = 8.9 Hz, 2H), 7.36 (d, *J* = 8.5 Hz, 2H), 7.27 (d, *J* = 8.5 Hz, 2H), 6.97 (s, 1H), 3.32 – 3.21 (m, 1H), 3.21 – 3.11 (m, 2H), 2.85 – 2.76 (m, 1H). <sup>13</sup>C NMR (100 MHz, CDCl<sub>3</sub>) δ 163.1, 151.2, 134.7, 134.6, 133.9, 133.3, 131.3, 129.8, 129.3, 129.1, 123.9, 116.5, 72.9, 33.3, 27.7. HRMS (ESI) m/z: [M + Na]<sup>+</sup> Calcd for C<sub>19</sub>H<sub>13</sub>ClN<sub>2</sub>O<sub>4</sub>Na 391.0456; Found 391.0464.

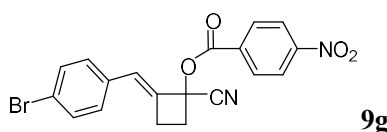

Purified by column chromatography (silica gel, EtOAc/Petroleum ether: 1/8) to afford the title compound (78% yield, 322 mg) as a white solid. mp: 145 °C. <sup>1</sup>H NMR (500 MHz, CDCl<sub>3</sub>) δ 8.33 (d, *J* = 8.8 Hz, 2H), 8.26 (d, *J* = 8.8 Hz, 2H), 7.52 (d, *J* = 8.5 Hz, 2H), 7.20 (d, *J* = 8.5 Hz, 2H), 6.96 (s, 1H), 3.31 – 3.20 (m, 1H), 3.19 – 3.08 (m, 2H), 2.85 – 2.75 (m, 1H). <sup>13</sup>C NMR (100 MHz, CDCl<sub>3</sub>) δ 163.1, 151.2, 134.8, 133.9, 133.7, 132.2, 131.3, 130.1, 129.5, 123.9, 123.0, 116.5, 72.9, 33.3, 27.7. HRMS (ESI) m/z: [M + Na]<sup>+</sup> Calcd for C<sub>19</sub>H<sub>13</sub>BrN<sub>2</sub>O<sub>4</sub>Na 434.9951; Found 434.9946.

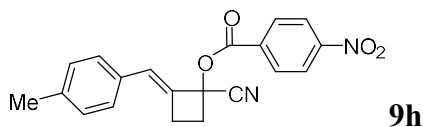

Purified by column chromatography (silica gel, EtOAc/Petroleum ether: 1/8) to afford the title compound (75% yield, 261 mg) as a white solid. mp: 116 °C. <sup>1</sup>H NMR (500 MHz, CDCl<sub>3</sub>) δ 8.33 (d, *J* = 8.9 Hz, 2H), 8.26 (d, *J* = 8.9 Hz, 2H), 7.24 (d, *J* = 8.1 Hz, 2H), 7.19 (d, *J* = 7.9 Hz, 2H), 6.97 (s, 1H), 3.32 – 3.22 (m, 1H), 3.19 – 3.08 (m, 2H), 2.83 – 2.73 (m, 1H), 2.37 (s, 3H). <sup>13</sup>C NMR (100 MHz, CDCl<sub>3</sub>) δ 163.2, 151.2, 139.0, 134.1, 132.7, 132.1, 131.3, 130.5, 129.7, 128.6, 123.9, 116.8, 73.1, 33.4, 27.7, 21.5. HRMS (ESI) m/z: [M + Na]<sup>+</sup> Calcd for C<sub>20</sub>H<sub>16</sub>N<sub>2</sub>O<sub>4</sub>Na 371.1003; Found 371.1002.

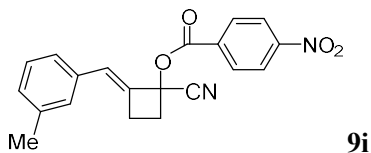

Purified by column chromatography (silica gel, EtOAc/Petroleum ether: 1/8) to afford the title compound (71% yield, 247 mg) as a yellow solid. mp: 121 °C. <sup>1</sup>H NMR (500 MHz, CDCl<sub>3</sub>) δ 8.29 (d, *J* = 8.9 Hz, 2H), 8.24 (d, *J* = 8.9 Hz, 2H), 7.27 (t, *J* = 7.7 Hz, 1H), 7.17 – 7.10 (m, 3H), 6.96 (s, 1H), 3.34 – 3.22 (m, 1H), 3.22 – 3.08 (m, 2H), 2.85 – 2.74 (m, 1H), 2.36 (s, 3H). <sup>13</sup>C NMR (125 MHz, CDCl<sub>3</sub>) δ 163.0, 151.0, 138.4, 134.7, 133.9, 133.6, 131.1, 130.4, 129.5, 129.4, 128.7, 125.5, 123.7, 116.6, 72.9, 33.3, 27.7, 21.4. HRMS (ESI) m/z: [M + Na]<sup>+</sup> Calcd for C<sub>20</sub>H<sub>16</sub>N<sub>2</sub>O<sub>4</sub>Na 371.1003; Found 371.1005.

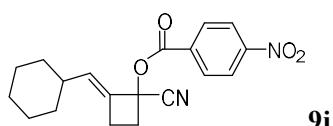

Purified by column chromatography (silica gel, EtOAc/Petroleum ether: 1/20) to afford the title compound (81% yield, 276 mg) as a yellow solid. mp: 100 °C. <sup>1</sup>H NMR (400 MHz, CDCl<sub>3</sub>) δ 8.37 – 8.28 (m, 2H), 8.27 – 8.17 (m, 2H), 6.01 – 5.95 (m, 1H), 3.02 – 2.94 (m, 1H), 2.93 – 2.78 (m, 2H), 2.67 – 2.55 (m, 1H), 2.16 – 2.04 (m, 1H), 1.80 – 1.57 (m, 5H), 1.37 – 1.09 (m, 5H). <sup>13</sup>C NMR (100 MHz, CDCl<sub>3</sub>) δ 163.1, 151.1, 137.6, 134.2, 131.2, 123.8, 117.1, 72.4, 37.8, 32.5, 32.4, 32.2, 26.0, 25.8, 24.7. HRMS (ESI) m/z: [M + Na]<sup>+</sup> Calcd for C<sub>19</sub>H<sub>20</sub>N<sub>2</sub>O<sub>4</sub>Na 341.1494; Found 341.1487.

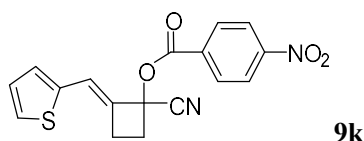

Purified by column chromatography (silica gel, EtOAc/Petroleum ether: 1/8) to afford the title compound (82% yield, 279 mg) as a white solid. mp: 127 °C. <sup>1</sup>H NMR (400 MHz, CDCl<sub>3</sub>) δ 8.33 (d, *J* = 8.9 Hz, 2H), 8.25 (d, *J* = 8.9 Hz, 2H), 7.41 (d, *J* = 5.1 Hz, 1H), 7.27 (d, *J* = 2.3 Hz, 1H), 7.14 (d, *J* = 3.6 Hz, 1H), 7.08 (dd, *J* = 5.1, 3.6 Hz, 1H), 3.25 – 3.02 (m, 3H), 2.86 – 2.73 (m, 1H). <sup>13</sup>C NMR (100 MHz, CDCl<sub>3</sub>) δ 163.2, 151.2, 138.4, 134.0, 131.8, 131.3, 129.3, 128.1, 127.6, 124.5, 123.9, 116.6, 72.5, 32.7, 27.2. HRMS (ESI) m/z: [M + Na]<sup>+</sup> Calcd for C<sub>17</sub>H<sub>12</sub>N<sub>2</sub>O<sub>4</sub>SNa 363.0410; Found 363.0404.

#### IV. General Procedure and Experimental Detail

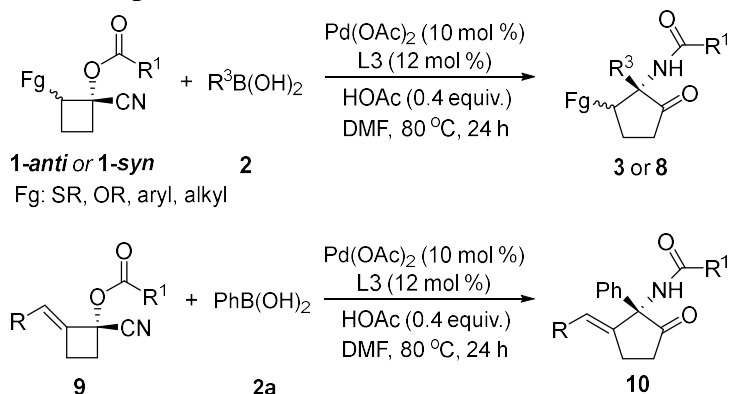

Substrate **1** or **9** (0.2 mmol), **2** (2.0 equiv.), Pd(OAc)<sub>2</sub> (10 mol %), 5,5'-dimethyl-2'-bipyridine (L3, 12 mol %) and DMF (0.4 M) were placed in a sealed tube under nitrogen atmosphere. The mixture was stirred at 80 °C for the desired time. Upon completion, the mixture was cooled to room temperature, the reaction mixture was treated with saturated NaHCO<sub>3</sub> and then extracted with DCM for three times. The combined organic layers were washed by brine and dried over Na<sub>2</sub>SO<sub>4</sub>, then concentrated under reduced pressure. The residue was purified by flash column chromatography (silica gel, EtOAc/Petroleum ether (60–90 °C)) to give the desired compounds **3** or **8** or **10**.

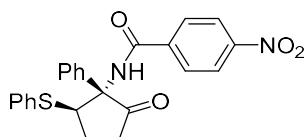

**3aa-anti**

Purified by column chromatography (silica gel, EtOAc/Petroleum ether: 1/5) to afford the title compound (92% yield, 79 mg) as a yellow solid. mp: 125 °C. <sup>1</sup>H NMR (400 MHz, CDCl<sub>3</sub>) δ 8.26 (d, *J* = 8.8 Hz, 2H), 7.76 (d, *J* = 8.8 Hz, 2H), 7.50 – 7.44 (m, 3H), 7.44 – 7.36 (m, 4H), 7.25 – 7.12 (m, 3H), 6.60 (brs, 1H), 5.09 – 5.02 (m, 1H), 3.00 – 2.85 (m, 1H), 2.72 – 2.63 (m, 1H), 2.61 – 2.50 (m, 1H), 2.07 – 1.91 (m, 1H). <sup>13</sup>C NMR (125 MHz, CDCl<sub>3</sub>) δ 211.4, 164.4, 149.8, 139.6, 134.9, 133.2, 133.0, 129.4, 129.1, 129.0, 128.5, 128.1, 127.5, 123.8, 70.3, 51.8, 31.0, 23.7. HRMS (ESI) *m/z*: [M + H]<sup>+</sup> Calcd for C<sub>24</sub>H<sub>21</sub>N<sub>2</sub>O<sub>4</sub>S 433.1217; Found 433.1214.

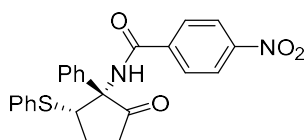

**3aa-syn**

Purified by column chromatography (silica gel, EtOAc/Petroleum ether: 1/5) to afford the title compound (87% yield, 75 mg) as a yellow solid. mp: 121 °C. <sup>1</sup>H NMR (400 MHz, CDCl<sub>3</sub>) δ 8.17 (d, *J* = 8.4 Hz, 2H), 7.85 (d, *J* = 8.4 Hz, 2H), 7.60 (d, *J* = 7.5 Hz, 2H), 7.49–7.47 (m, 3H), 7.37 (t, *J* = 7.5 Hz, 2H), 7.33 – 7.21 (m, 4H), 5.41 (d, *J* = 4.3 Hz, 1H), 2.64 – 2.52 (m, 1H), 2.37 – 2.20 (m, 2H), 2.17 – 2.02 (m, 1H). <sup>13</sup>C NMR (125 MHz, CDCl<sub>3</sub>) δ 212.1, 165.4, 150.0, 139.2, 135.2, 135.0, 131.5, 129.4, 129.3, 129.0, 128.4, 127.5, 127.4, 123.9, 71.5, 51.4, 37.1, 26.7. HRMS (ESI) *m/z*: [M + H]<sup>+</sup> Calcd for C<sub>24</sub>H<sub>21</sub>N<sub>2</sub>O<sub>4</sub>S 433.1217; Found 433.1213.

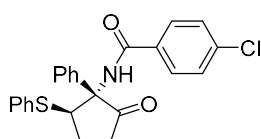

**3ba-anti**

Purified by column chromatography (silica gel, EtOAc/Petroleum ether: 1/8) to afford the title compound (83% yield, 70 mg) as a yellow solid. mp: 127 °C. <sup>1</sup>H NMR (400 MHz, CDCl<sub>3</sub>) δ 8.24 (d, *J* = 8.7 Hz, 2H), 7.73 (d, *J* = 8.8 Hz, 2H), 7.44 (d, *J* = 7.0 Hz, 2H), 7.41 – 7.30 (m, 4H), 7.26 – 7.25 (m, 1H), 7.24 – 7.14 (m, 3H), 6.51 (brs, 1H), 5.08 – 4.99 (m, 1H), 2.99 – 2.84 (m, 1H), 2.69 – 2.61 (m, 1H), 2.61 – 2.51 (m, 1H), 2.06 – 1.88 (m, 1H). <sup>13</sup>C NMR (125 MHz, CDCl<sub>3</sub>) δ 211.4, 165.9, 138.4, 135.5, 134.4, 131.9, 131.3, 129.2, 129.2, 128.9, 128.8, 128.5, 127.4, 127.1, 71.8, 49.4, 35.4, 24.8. HRMS (ESI) *m/z*: [M + H]<sup>+</sup> Calcd for C<sub>24</sub>H<sub>21</sub>ClNO<sub>2</sub>S 422.0976; Found 422.0970.

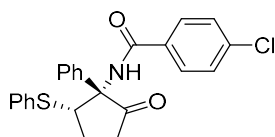

**3ba-syn**

Purified by column chromatography (silica gel, EtOAc/Petroleum ether: 1/10) to afford the title compound (70% yield, 59 mg) as a yellow solid. mp: 133 °C. <sup>1</sup>H NMR (400 MHz, CDCl<sub>3</sub>) δ 7.73 (d, *J* = 8.6 Hz, 2H), 7.65 – 7.57 (m, 2H), 7.55 – 7.47 (m, 2H), 7.44 – 7.37 (m, 4H), 7.37 – 7.31 (m, 4H), 7.28 (brs, 1H), 5.41 (d, *J* = 4.6 Hz, 1H), 2.76 – 2.54 (m, 1H), 2.41 – 2.19 (m, 2H), 2.14 – 2.07 (m, 1H). <sup>13</sup>C NMR (100 MHz, CDCl<sub>3</sub>) δ 212.6, 166.3, 138.5, 135.6, 135.1, 132.0, 131.4, 129.3, 129.2, 129.0, 128.9, 128.6, 127.4, 127.2, 71.1, 51.6, 37.1, 26.9. HRMS (ESI) *m/z*: [M + Na]<sup>+</sup> Calcd for C<sub>24</sub>H<sub>21</sub>ClNO<sub>2</sub>S 422.0976; Found. 422.0978.

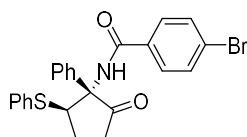

**3ca-anti**

Purified by column chromatography (silica gel, EtOAc/Petroleum ether: 1/5) to afford the title compound (70% yield, 65 mg) as a white solid. mp: 150 °C. <sup>1</sup>H NMR (400 MHz, CDCl<sub>3</sub>) δ 7.55 – 7.46 (m, 4H), 7.46 – 7.38 (m, 5H), 7.38 – 7.32 (m, 2H), 7.21 – 7.11 (m, 3H), 6.63 (brs, 1H), 5.06 – 4.99 (m, 1H), 2.98 – 2.83 (m, 1H), 2.68 – 2.54 (m, 1H), 2.57 – 2.47 (m, 1H), 2.06 – 1.90 (m, 1H). <sup>13</sup>C NMR (125 MHz, CDCl<sub>3</sub>) δ 212.4, 166.4, 135.4, 135.4, 132.4, 131.9, 131.3, 129.2, 129.1, 128.8, 128.7, 127.4, 127.1, 126.8, 71.0, 51.5, 37.0, 26.8. HRMS (ESI) *m/z*: [M + Na]<sup>+</sup> Calcd for C<sub>24</sub>H<sub>20</sub>BrNO<sub>2</sub>SNa 466.0471; Found 466.0467.

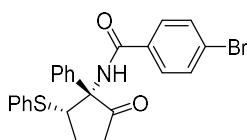

**3ca-syn**

Purified by column chromatography (silica gel, EtOAc/Petroleum ether: 1/8) to afford the title compound (76% yield, 71 mg) as a white solid. mp: 129 °C. <sup>1</sup>H NMR (400 MHz, CDCl<sub>3</sub>) δ 7.65 (d, *J* = 8.5 Hz, 2H), 7.61 (d, *J* = 7.4 Hz, 2H), 7.56 (d, *J* = 8.5 Hz, 2H), 7.52 (d, *J* = 6.3 Hz, 2H), 7.43 – 7.37 (m, 2H), 7.37 – 7.31 (m, 3H), 7.31 (d, *J* = 6.4 Hz, 2H), 5.41 (d, *J* = 4.5 Hz, 1H), 2.68 – 2.55 (m, 1H), 2.46 – 2.20 (m, 2H), 2.18 – 2.03 (m, 1H). <sup>13</sup>C NMR (125 MHz, CDCl<sub>3</sub>) δ 211.6, 165.4, 135.3, 133.3, 133.2, 132.8, 131.8, 129.3, 129.0, 128.9, 128.8, 127.9, 127.5, 126.5, 70.0, 52.0, 31.2, 23.7. HRMS (ESI) *m/z*: [M + Na]<sup>+</sup> Calcd for C<sub>24</sub>H<sub>20</sub>BrNO<sub>2</sub>SNa 466.0471; Found 466.0465.

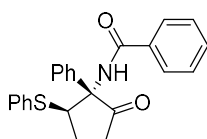

**3da-anti**

Purified by column chromatography (silica gel, EtOAc/Petroleum ether: 1/5) to afford the title compound (81% yield, 62 mg) as a white solid. mp: 113 °C. <sup>1</sup>H NMR (400 MHz, CDCl<sub>3</sub>) δ 7.70 (d, *J* = 7.2 Hz, 2H), 7.56 – 7.45 (m, 6H), 7.45 – 7.38 (m, 4H), 7.24 – 7.12 (m, 3H), 6.78 (brs, 1H), 5.15 – 5.06 (m, 1H), 3.05 – 2.90 (m, 1H), 2.72 – 2.63 (m, 1H), 2.61 – 2.51 (m, 1H), 2.12 – 1.95 (m, 1H). <sup>13</sup>C NMR (125 MHz, CDCl<sub>3</sub>) δ 211.6, 166.2, 135.5, 133.9, 133.4, 133.1, 131.7, 129.2, 128.9, 128.6, 128.5, 127.7, 127.4, 127.2, 69.8, 52.1, 31.3, 23.8. HRMS (ESI) *m/z*: [M + Na]<sup>+</sup> Calcd for [M + H]<sup>+</sup> Calcd for C<sub>24</sub>H<sub>22</sub>NO<sub>2</sub>S 388.1366; Found 388.1369.

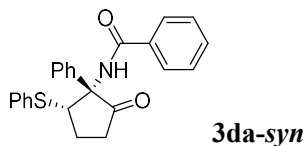

Purified by column chromatography (silica gel, EtOAc/Petroleum ether: 1/5) to afford the title compound (83% yield, 64 mg) as a yellow oil. <sup>1</sup>H NMR (400 MHz, CDCl<sub>3</sub>) δ 7.79 – 7.74 (m, 2H), 7.61 – 7.54 (m, 2H), 7.51 – 7.44 (m, 3H), 7.42 – 7.35 (m, 2H), 7.39 – 7.36 (m, 1H), 7.38 – 7.30 (m, 2H), 7.32 – 7.29 (m, 2H), 7.30 – 7.24 (m, 2H), 5.38 (d, *J* = 4.5 Hz, 1H), 2.65 – 2.51 (m, 1H), 2.35 – 2.18 (m, 2H), 2.13 – 1.98 (m, 1H). <sup>13</sup>C NMR (100 MHz, CDCl<sub>3</sub>) δ 211.7, 166.2, 135.4, 133.9, 133.4, 133.1, 131.7, 129.2, 128.9, 128.6, 128.5, 127.7, 127.4, 127.2, 69.8, 52.1, 31.2, 23.7. HRMS (ESI) *m/z*: [M + H]<sup>+</sup> Calcd for C<sub>24</sub>H<sub>22</sub>NO<sub>2</sub>S 388.1366; Found 388.1365.

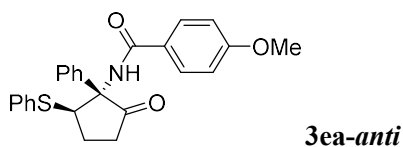

Purified by column chromatography (silica gel, EtOAc/Petroleum ether: 1/3) to afford the title compound (68% yield, 57 mg) as a yellow oil. <sup>1</sup>H NMR (400 MHz, CDCl<sub>3</sub>) δ 7.64 (d, *J* = 8.9 Hz, 2H), 7.49 – 7.38 (m, 5H), 7.36 (dd, *J* = 8.1, 1.6 Hz, 2H), 7.22 – 7.09 (m, 3H), 6.90 (d, *J* = 8.8 Hz, 2H), 6.58 (brs, 1H), δ 5.09 – 5.00 (m, 1H), 3.85 (s, 3H), 3.05 – 2.84 (m, 1H), 2.69 – 2.48 (m, 2H), 2.08 – 1.89 (m, 1H). <sup>13</sup>C NMR (125 MHz, CDCl<sub>3</sub>) δ 211.9, 165.9, 162.5, 135.7, 133.6, 133.2, 129.2, 129.1, 128.9, 128.6, 127.8, 127.5, 126.3, 113.8, 69.9, 55.6, 52.3, 31.4, 23.9. HRMS (ESI) *m/z*: [M + Na]<sup>+</sup> Calcd for C<sub>25</sub>H<sub>23</sub>NO<sub>3</sub>SNa 440.1291; Found 440.1285.

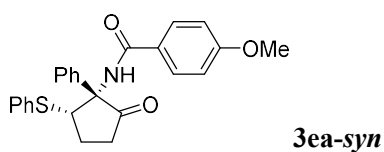

Purified by column chromatography (silica gel, EtOAc/Petroleum ether: 1/3) to afford the title compound (55% yield, 46 mg) as a yellow oil. <sup>1</sup>H NMR (400 MHz, CDCl<sub>3</sub>) δ 7.73 (d, *J* = 8.8 Hz, 2H), 7.57 (d, *J* = 7.5 Hz, 2H), 7.47 (d, *J* = 6.6 Hz, 2H), 7.34 (t, *J* = 7.4 Hz, 2H), 7.31 – 7.27 (m, 2H), 7.27 – 7.19 (m, 3H), 6.87 (d, *J* = 8.9 Hz, 2H), 5.37 (d, *J* = 3.3 Hz, 1H), 3.79 (s, 3H), 2.67 – 2.48 (m, 1H), 2.41 – 2.16 (m, 2H), 2.16 – 1.93 (m, 1H). <sup>13</sup>C NMR (100 MHz, CDCl<sub>3</sub>) δ 211.8, 165.8, 162.4, 135.6, 133.5, 133.0, 129.2, 129.0, 128.8, 128.6, 127.7, 127.4, 126.2, 113.7, 69.7, 55.4, 52.2, 31.4, 23.8. (ESI) *m/z*: [M + H]<sup>+</sup> Calcd for C<sub>25</sub>H<sub>24</sub>NO<sub>3</sub>S 418.1471; Found 418.1469.

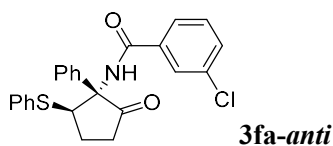

Purified by column chromatography (silica gel, EtOAc/Petroleum ether: 1/8) to afford the title compound (86% yield, 73 mg) as a yellow oil. <sup>1</sup>H NMR (400 MHz, CDCl<sub>3</sub>) δ 7.56 (s, 1H), 7.52 – 7.47 (m, 2H), 7.46 – 7.39 (m, 5H), 7.41 – 7.34 (m, 2H), 7.32 (t, *J* = 7.9 Hz, 1H), 7.23 – 7.12 (m, 3H), 6.58 (s, 1H), 5.11 – 4.99 (m, 1H), 3.03 – 2.84 (m, 1H), 2.70 – 2.59 (m, 1H), 2.59 – 2.49 (m, 1H), 2.07 – 1.90 (m, 1H). <sup>13</sup>C NMR (100 MHz, CDCl<sub>3</sub>) δ 212.4, 166.1, 135.4, 135.4, 135.0, 134.8, 132.1, 131.4, 130.0, 129.3, 129.2, 128.9, 127.4, 127.3, 125.2, 71.1, 51.5, 37.0, 26.8. HRMS (ESI) *m/z*: [M + H]<sup>+</sup> Calcd for C<sub>24</sub>H<sub>21</sub>ClNO<sub>2</sub>S 422.0976; Found 422.0982.

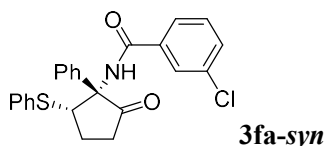

Purified by column chromatography (silica gel, EtOAc/Petroleum ether: 1/8) to afford the title compound (67% yield, 57 mg) as a yellow oil. <sup>1</sup>H NMR (500 MHz, CDCl<sub>3</sub>) δ 7.72 (s, 1H), 7.61 (d, *J* = 7.8 Hz, 1H), 7.56 (d, *J* = 7.4 Hz, 2H), 7.48 (d, *J* = 6.9 Hz, 2H), 7.44 (d, *J* = 7.8 Hz, 1H), 7.36 (t, *J* = 7.6 Hz, 2H), 7.33 – 7.28 (m, 4H), 7.28 – 7.24 (m, 2H), 5.37 (d, *J* = 4.7 Hz, 1H), 2.64 – 2.51 (m, 1H), 2.36 – 2.26 (m, 1H), 2.27 – 2.18 (m, 1H), 2.12 – 2.01 (m, 1H). <sup>13</sup>C NMR (125 MHz, CDCl<sub>3</sub>) δ 211.6, 165.0, 135.8, 135.2, 134.8, 133.2, 131.9, 129.9, 129.3, 129.0, 128.8, 127.9, 127.7, 127.5, 125.2, 70.1, 52.0, 31.2, 23.7. HRMS (ESI) *m/z*: [M + H]<sup>+</sup> Calcd for C<sub>24</sub>H<sub>21</sub>ClNO<sub>2</sub>S 422.0976; Found 422.0979.

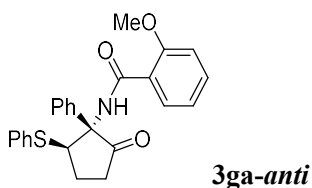

Purified by column chromatography (silica gel, EtOAc/Petroleum ether: 1/5) to afford the title compound (68% yield, 57 mg) as a yellow oil. <sup>1</sup>H NMR (400 MHz, CDCl<sub>3</sub>) δ 8.94 (brs, 1H), 8.14 (d, *J* = 7.8 Hz, 1H), 7.52 – 7.41 (m, 4H), 7.41 – 7.36 (m, 2H), 7.36 – 7.30 (m, 2H), 7.20 – 7.05 (m, 4H), 6.95 (d, *J* = 8.3 Hz, 1H), 5.08 – 5.00 (m, 1H), 3.90 (s, 3H), 3.10 – 2.94 (m, 1H), 2.73 – 2.60 (m, 1H), 2.60 – 2.49 (m, 1H), 2.08 – 1.92 (m, 1H). <sup>13</sup>C NMR (100 MHz, CDCl<sub>3</sub>) δ 213.5, 164.6, 157.9, 136.5, 135.2, 133.6, 132.3, 131.3, 129.0, 128.8, 128.7, 127.2, 126.8, 121.5, 120.5, 111.4, 70.6, 56.2, 52.0, 37.3, 27.3. HRMS (ESI) *m/z*: [M + H]<sup>+</sup> Calcd for C<sub>25</sub>H<sub>24</sub>NO<sub>3</sub>S 418.1471; Found 418.1473.

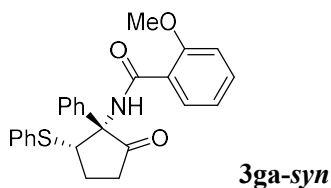

Purified by column chromatography (silica gel, EtOAc/Petroleum ether: 1/8) to afford the title compound (51% yield, 43 mg) as a yellow oil. <sup>1</sup>H NMR (400 MHz, CDCl<sub>3</sub>) δ 9.28 (s, 1H), 8.07 (d, *J* = 7.9 Hz, 1H), 7.56 (d, *J* = 8.1 Hz, 2H), 7.48 – 7.38 (m, 3H), 7.36 – 7.29 (m, 2H), 7.29 – 7.23 (m, 3H), 7.25 – 7.18 (m, 1H), 7.04 – 6.92 (m, 2H), 5.32 – 5.24 (m, 1H), 4.06 (s, 3H), 2.64 – 2.51 (m, 1H), 2.35 – 2.21 (m, 2H), 2.18 – 2.03 (m, 1H). <sup>13</sup>C NMR (100 MHz, CDCl<sub>3</sub>) δ 211.7, 164.4, 158.0, 136.3, 133.9, 133.2, 133.0, 132.3, 129.1, 128.8, 128.3, 127.6, 127.4, 121.2, 121.0, 111.6, 70.3, 56.3, 52.6, 31.9, 24.3. HRMS (ESI) *m/z*: [M + Na]<sup>+</sup> Calcd for C<sub>25</sub>H<sub>23</sub>NO<sub>3</sub>SNa 440.1285; Found 440.1283.



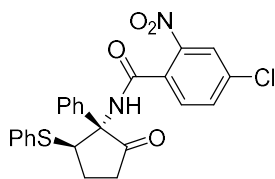

**3ha-anti**

Purified by column chromatography (silica gel, EtOAc/Petroleum ether: 1/5) to afford the title compound (79% yield, 74 mg) as a yellow solid. mp: 191 °C. <sup>1</sup>H NMR (400 MHz, CDCl<sub>3</sub>) δ 8.07 (d, *J* = 2.0 Hz, 1H), 7.62 (dd, *J* = 8.2, 2.0 Hz, 1H), 7.61 – 7.55 (m, 2H), 7.47 – 7.42 (m, 3H), 7.42 – 7.37 (m, 3H), 7.37 – 7.29 (m, 3H), 6.55 (brs, 1H), 5.01 – 4.92 (m, 1H), 2.91 – 2.76 (m, 1H), 2.70 – 2.62 (m, 1H), 2.56 – 2.44 (m, 1H), 2.10 – 1.89 (m, 1H). <sup>13</sup>C NMR (100 MHz, CDCl<sub>3</sub>) δ 212.4, 165.3, 147.3, 137.2, 135.2, 134.4, 133.8, 132.9, 130.3, 130.0, 129.4, 129.3, 129.0, 127.7, 127.2, 125.1, 71.1, 52.4, 37.1, 27.5. HRMS (ESI) *m/z*: [M + H]<sup>+</sup> Calcd for C<sub>24</sub>H<sub>20</sub>ClN<sub>2</sub>O<sub>4</sub>S 467.0827; Found 467.0829.

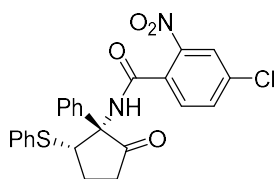

**3ha-syn**

Purified by column chromatography (silica gel, EtOAc/Petroleum ether: 1/5) to afford the title compound (66% yield, 62 mg) as a yellow solid. mp: 157 °C. <sup>1</sup>H NMR (400 MHz, CDCl<sub>3</sub>) δ 7.99 (s, 1H), 7.60 – 7.56 (m, 3H), 7.56 – 7.52 (m, 3H), 7.41 (t, *J* = 7.4 Hz, 2H), 7.38 – 7.31 (m, 4H), 7.07 (brs, 1H), 5.37 (d, *J* = 4.2 Hz, 1H), 2.63 – 2.45 (m, 1H), 2.45 – 2.25 (m, 1H), 2.25 – 2.17 (m, 1H), 2.12 – 1.92 (m, 1H). <sup>13</sup>C NMR (100 MHz, CDCl<sub>3</sub>) δ 211.1, 164.2, 146.5, 136.5, 133.8, 133.4, 132.9, 130.7, 130.3, 129.4, 129.0, 128.9, 128.2, 127.5, 124.7, 70.2, 52.2, 30.8, 23.5. HRMS (ESI) *m/z*: [M + H]<sup>+</sup> Calcd for C<sub>24</sub>H<sub>20</sub>ClN<sub>2</sub>O<sub>4</sub>S 467.0827; Found 467.0836.

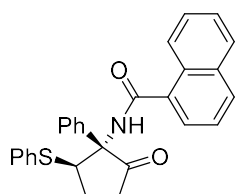

**3ia-anti**

Purified by column chromatography (silica gel, EtOAc/Petroleum ether: 1/5) to afford the title compound (72% yield, 69 mg) as a yellow solid. mp: 152 °C. <sup>1</sup>H NMR (500 MHz, CDCl<sub>3</sub>) δ 8.33 (d, *J* = 9.0 Hz, 1H), 7.93 (d, *J* = 8.0 Hz, 1H), 7.88 (d, *J* = 7.4 Hz, 1H), 7.62 – 7.52 (m, 4H), 7.49 – 7.38 (m, 7H), 7.37 – 7.29 (m, 2H), 7.29 – 7.24 (m, 1H), 6.62 (brs, 1H), 5.33 – 5.21 (m, 1H), 3.14 – 2.98 (m, 1H), 2.84 – 2.71 (m, 1H), 2.71 – 2.59 (m, 1H), 2.18 – 1.96 (m, 1H). <sup>13</sup>C NMR (125 MHz, CDCl<sub>3</sub>) δ 212.7, 169.6, 135.5, 133.7, 133.2, 131.6, 131.1, 130.3, 129.4, 129.1, 128.8, 128.4, 127.5, 127.5, 127.3, 126.6, 125.4, 125.3, 124.7, 71.5, 52.2, 37.2, 27.1. HRMS (ESI) *m/z*: [M + H]<sup>+</sup> Calcd for C<sub>28</sub>H<sub>24</sub>NO<sub>2</sub>S 438.1522; Found 438.1523.

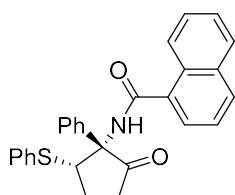

**3ia-syn**

Purified by column chromatography (silica gel, EtOAc/Petroleum ether: 1/10) to afford the title compound (62% yield, 60 mg) as a yellow solid. mp: 159 °C. <sup>1</sup>H NMR (500 MHz, CDCl<sub>3</sub>) δ 8.29 – 8.22 (m, 1H), 7.92 (d, *J* = 8.3 Hz,

1H), 7.89 – 7.82 (m, 1H), 7.72 – 7.64 (m, 3H), 7.64 – 7.58 (m, 2H), 7.55 – 7.47 (m, 2H), 7.47 – 7.43 (m, 3H), 7.41 – 7.33 (m, 4H), 7.18 (brs, 1H), 5.50 (d,  $J = 3.9$  Hz, 1H), 2.72 – 2.57 (m, 1H), 2.42 – 2.24 (m, 2H), 2.24 – 2.13 (m, 1H).  $^{13}\text{C}$  NMR (125 MHz,  $\text{CDCl}_3$ )  $\delta$  211.5, 168.6, 135.7, 133.8, 133.7, 133.6, 133.4, 130.9, 130.4, 129.4, 129.0, 128.8, 128.2, 128.0, 127.5, 127.2, 126.5, 125.7, 125.3, 124.7, 70.1, 52.6, 31.5, 24.1. HRMS (ESI)  $m/z$ :  $[\text{M} + \text{H}]^+$  Calcd for  $\text{C}_{28}\text{H}_{24}\text{NO}_2\text{S}$  438.1522; Found 438.1526.

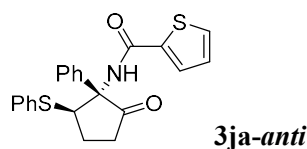

Purified by column chromatography (silica gel, EtOAc/Petroleum ether: 1/5) to afford the title compound (78% yield, 61 mg) as a yellow solid. mp: 125 °C.  $^1\text{H}$  NMR (500 MHz,  $\text{CDCl}_3$ )  $\delta$  7.54 – 7.41 (m, 7H), 7.39 (d,  $J = 7.5$  Hz, 2H), 7.25 – 7.13 (m, 3H), 7.07 (d,  $J = 4.4$  Hz, 1H), 6.56 (brs, 1H), 5.09 – 5.00 (m, 1H), 2.99 – 2.85 (m, 1H), 2.73 – 2.60 (m, 1H), 2.60 – 2.51 (m, 1H), 2.07 – 1.94 (m, 1H).  $^{13}\text{C}$  NMR (125 MHz,  $\text{CDCl}_3$ )  $\delta$  212.5, 161.8, 137.7, 135.6, 135.0, 131.4, 130.9, 129.2, 129.0, 128.9, 127.8, 127.4, 127.1, 70.9, 51.9, 37.0, 27.0. HRMS (ESI)  $m/z$ :  $[\text{M} + \text{H}]^+$  Calcd for  $\text{C}_{22}\text{H}_{20}\text{NO}_2\text{S}_2$  394.0930; Found 394.0928.

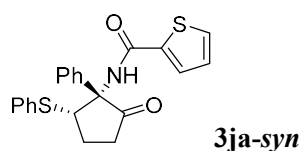

Purified by column chromatography (silica gel, EtOAc/Petroleum ether: 1/5) to afford the title compound (74% yield, 57 mg) as a yellow solid.  $^1\text{H}$  NMR (500 MHz,  $\text{CDCl}_3$ )  $\delta$  7.59 (d,  $J = 7.5$  Hz, 2H), 7.54 (d,  $J = 3.8$  Hz, 1H), 7.51 (d,  $J = 7.1$  Hz, 2H), 7.46 (d,  $J = 4.9$  Hz, 1H), 7.40 – 7.35 (m, 2H), 7.35 – 7.30 (m, 3H), 7.28 (t,  $J = 3.5$  Hz, 1H), 7.15 (brs, 1H), 7.09 – 7.02 (m, 1H), 5.38 (d,  $J = 4.7$  Hz, 1H), 2.62 – 2.55 (m, 1H), 2.34 – 2.29 (m, 1H), 2.28 – 2.18 (m, 1H), 2.14 – 2.05 (m, 1H).  $^{13}\text{C}$  NMR (125 MHz,  $\text{CDCl}_3$ )  $\delta$  211.4, 160.8, 138.5, 135.3, 133.4, 133.2, 130.5, 129.2, 128.9, 128.7, 128.6, 127.8, 127.7, 127.5, 70.0, 52.2, 31.2, 23.7. HRMS (ESI)  $m/z$ :  $[\text{M} + \text{H}]^+$  Calcd for  $\text{C}_{22}\text{H}_{20}\text{NO}_2\text{S}_2$  394.0930; Found 394.0925.

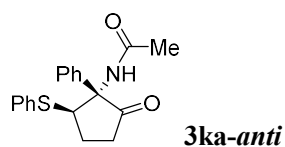

Purified by column chromatography (silica gel, EtOAc/Petroleum ether: 1/3) to afford the title compound (74% yield, 48 mg) as a white solid. mp: 127 °C.  $^1\text{H}$  NMR (400 MHz,  $\text{CDCl}_3$ )  $\delta$  7.43 – 7.36 (m, 5H), 7.34 – 7.31 (m, 2H), 7.31 – 7.28 (m, 1H), 7.27 – 7.18 (m, 2H), 6.12 (brs, 1H), 4.97 – 4.84 (m, 1H), 2.90 – 2.74 (m, 1H), 2.65 – 2.51 (m, 1H), 2.50 – 2.40 (m, 1H), 1.93 (s, 3H), 1.92 – 1.83 (m, 1H).  $^{13}\text{C}$  NMR (100 MHz,  $\text{CDCl}_3$ )  $\delta$  213.1, 170.2, 135.4, 135.2, 131.2, 129.2, 129.1, 128.7, 127.4, 127.1, 70.7, 51.5, 37.1, 26.9, 23.2. HRMS (ESI)  $m/z$ :  $[\text{M} + \text{H}]^+$  Calcd for  $\text{C}_{19}\text{H}_{20}\text{NO}_2\text{S}$  326.1209; Found 326.1205.

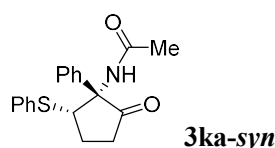

Purified by column chromatography (silica gel, EtOAc/Petroleum ether: 1/5) to afford the title compound (57% yield, 37 mg) as a white solid. mp: 135 °C. <sup>1</sup>H NMR (400 MHz, CDCl<sub>3</sub>) δ 7.52 – 7.46 (m, 4H), 7.37 – 7.27 (m, 6H), 6.58 (brs, 1H), 5.24 (d, *J* = 4.3 Hz, 1H), 2.58 – 2.41 (m, 1H), 2.29 – 2.18 (m, 1H), 2.18 – 2.07 (m, 1H), 2.04 – 1.96 (m, 1H), 1.90 (s, 3H). <sup>13</sup>C NMR (100 MHz, CDCl<sub>3</sub>) δ 211.6, 169.3, 135.6, 133.4, 133.1, 129.2, 128.8, 128.5, 127.8, 127.3, 69.7, 52.1, 31.3, 23.7, 23.2. HRMS (ESI) *m/z*: [M + H]<sup>+</sup> Calcd for C<sub>19</sub>H<sub>20</sub>NO<sub>2</sub>S 326.1209; Found 326.1204.

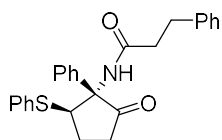

**3la-anti**

Purified by column chromatography (silica gel, EtOAc/Petroleum ether: 1/3) to afford the title compound (91% yield, 76 mg) as a white solid. mp: 133 °C. <sup>1</sup>H NMR (400 MHz, CDCl<sub>3</sub>) δ 7.41 – 7.33 (m, 5H), 7.29 – 7.27 (m, 3H), 7.25 – 7.15 (m, 7H), 5.92 (brs, 1H), 4.95 – 4.86 (m, 1H), 2.97 – 2.77 (m, 3H), 2.64 – 2.53 (m, 1H), 2.53 – 2.42 (m, 3H), 2.00 – 1.84 (m, 1H). <sup>13</sup>C NMR (125 MHz, CDCl<sub>3</sub>) δ 212.9, 172.1, 140.5, 135.5, 135.3, 131.3, 129.2, 129.1, 128.8, 128.8, 128.5, 127.3, 127.2, 126.5, 70.6, 51.7, 37.9, 37.1, 31.3, 27.0. HRMS (ESI) *m/z*: [M + H]<sup>+</sup> Calcd for C<sub>26</sub>H<sub>26</sub>NO<sub>2</sub>S 416.1679; Found 416.1681.

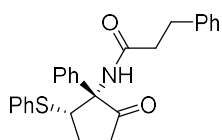

**3la-syn**

Purified by column chromatography (silica gel, EtOAc/Petroleum ether: 1/3) to afford the title compound (82% yield, 68 mg) as a yellow oil. <sup>1</sup>H NMR (500 MHz, CDCl<sub>3</sub>) δ 7.49 – 7.45 (m, 2H), 7.44 – 7.43 (m, 2H), 7.33 – 7.27 (m, 6H), 7.20 – 7.17 (m, 2H), 7.15 – 7.12 (m, 1H), 7.08 (d, *J* = 6.9 Hz, 2H), 6.53 (brs, 1H), 5.23 (d, *J* = 4.7 Hz, 1H), 2.90 – 2.81 (m, 2H), 2.58 – 2.34 (m, 3H), 2.25 – 2.16 (m, 1H), 2.17 – 2.08 (m, 1H), 2.08 – 1.95 (m, 1H). <sup>13</sup>C NMR (125 MHz, CDCl<sub>3</sub>) δ 211.6, 171.4, 140.8, 135.6, 133.6, 133.1, 129.3, 128.8, 128.5, 128.4, 127.8, 127.4, 126.2, 69.7, 52.1, 37.9, 31.4, 31.2, 23.8. HRMS (ESI) *m/z*: [M + H]<sup>+</sup> Calcd for C<sub>26</sub>H<sub>26</sub>NO<sub>2</sub>S 416.1679; Found 416.1678.

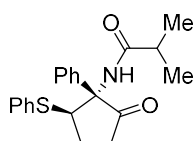

**3ma-anti**

Purified by column chromatography (silica gel, EtOAc/Petroleum ether: 1/5) to afford the title compound (64% yield, 43 mg) as a yellow solid. mp: 121 °C. <sup>1</sup>H NMR (400 MHz, CDCl<sub>3</sub>) δ 7.45 – 7.42 (m, 5H), 7.37 (d, *J* = 7.2 Hz, 2H), 7.32 – 7.23 (m, 3H), 6.15 (brs, 1H), 4.94 – 4.89 (m, 1H), 2.94 – 2.84 (m, 1H), 2.66 – 2.46 (m, 2H), 2.42 – 2.35 (m, 1H), 2.05 – 1.89 (m, 1H), 1.15 – 1.12 (m, 6H). <sup>13</sup>C NMR (125 MHz, CDCl<sub>3</sub>) δ 212.9, 177.0, 135.7, 135.4, 131.4, 129.2, 129.0, 128.7, 127.4, 127.1, 70.3, 52.1, 37.0, 35.2, 27.1, 19.5, 19.3. HRMS (ESI) *m/z*: [M + Na]<sup>+</sup> Calcd for C<sub>21</sub>H<sub>23</sub>NO<sub>2</sub>SNa 376.1342; Found 376.1346.

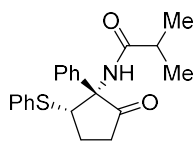

**3ma-syn**

Purified by column chromatography (silica gel, EtOAc/Petroleum ether: 1/5) to afford the title compound (38% yield,

27 mg) as a yellow solid. mp: 122 °C. <sup>1</sup>H NMR (400 MHz, CDCl<sub>3</sub>) δ 7.44 – 7.36 (m, 5H), 7.36 – 7.30 (m, 2H), 7.30 – 7.18 (m, 3H), 6.06 (brs, 1H), 4.92 – 4.78 (m, 1H), 2.96 – 2.78 (m, 1H), 2.68 – 2.55 (m, 1H), 2.55 – 2.43 (m, 1H), 2.42 – 2.30 (m, 1H), 2.04 – 1.87 (m, 1H), 1.12 – 1.03 (m, 6H). <sup>13</sup>C NMR (100 MHz, CDCl<sub>3</sub>) δ 213.0, 177.0, 135.8, 135.5, 131.4, 129.2, 129.0, 128.8, 127.4, 127.2, 70.4, 52.2, 37.1, 35.3, 27.1, 19.5, 19.3. HRMS (ESI) m/z: [M + H]<sup>+</sup> Calcd for C<sub>21</sub>H<sub>24</sub>NO<sub>2</sub>S 354.1522; Found 354.1516.

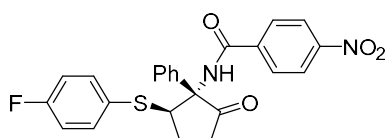

**3na-anti**

Purified by column chromatography (silica gel, EtOAc/Petroleum ether: 1/5) to afford the title compound (88% yield, 79 mg) as a yellow solid. mp: 173 °C. <sup>1</sup>H NMR (500 MHz, CDCl<sub>3</sub>) δ 8.24 (d, *J* = 8.5 Hz, 2H), 7.80 (d, *J* = 8.4 Hz, 2H), 7.46 – 7.40 (m, 3H), 7.42 – 7.38 (m, 2H), 7.34 (dd, *J* = 8.5, 5.2 Hz, 2H), 6.90 (t, *J* = 8.5 Hz, 2H), 6.77 (brs, 1H), 4.94 – 4.86 (m, 1H), 2.89 – 2.80 (m, 1H), 2.71 – 2.58 (m, 1H), 2.55 – 2.45 (m, 1H), 2.05 – 1.92 (m, 1H). δ 212.0, 165.4, 162.4 (d, *J* = 248.5 Hz), 149.9, 139.0, 135.0, 134.4 (d, *J* = 8.1 Hz), 129.8, 129.4, 129.0, 128.3, 127.3, 124.0, 116.4 (d, *J* = 22.1 Hz), 71.3, 52.4, 37.0, 26.8. HRMS (ESI) m/z: [M + Na]<sup>+</sup> Calcd for C<sub>24</sub>H<sub>19</sub>FN<sub>2</sub>O<sub>4</sub>SNa 473.0942; Found 473.0946.

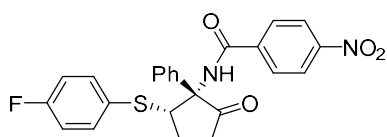

**3na-syn**

Purified by column chromatography (silica gel, EtOAc/Petroleum ether: 1/8) to afford the title compound (62% yield, 56 mg) as a yellow solid. mp: 139 °C. <sup>1</sup>H NMR (400 MHz, CDCl<sub>3</sub>) δ 8.25 (d, *J* = 8.8 Hz, 2H), 7.89 (d, *J* = 8.8 Hz, 2H), 7.56 (d, *J* = 7.0 Hz, 2H), 7.49 (dd, *J* = 8.7, 5.3 Hz, 2H), 7.42 – 7.29 (m, 4H), 7.01 (t, *J* = 8.6 Hz, 2H), 5.30 (d, *J* = 4.6 Hz, 1H), 2.64 – 2.51 (m, 1H), 2.41 – 2.29 (m, 1H), 2.27 – 2.18 (m, 1H), 2.10 – 1.98 (m, 1H). <sup>13</sup>C NMR (100 MHz, CDCl<sub>3</sub>) δ 211.3, 164.4, 162.9 (d, *J* = 248.8 Hz), 149.8, 139.5, 135.9 (d, *J* = 8.2 Hz), 134.8, 129.1, 129.1, 128.4, 128.0 (d, *J* = 3.4 Hz), 127.4, 123.9, 116.6 (d, *J* = 21.9 Hz), 70.3, 52.5, 30.9, 23.5. HRMS (ESI) m/z: [M + H]<sup>+</sup> Calcd for C<sub>24</sub>H<sub>20</sub>FN<sub>2</sub>O<sub>4</sub>S 451.1122; Found 451.1117.

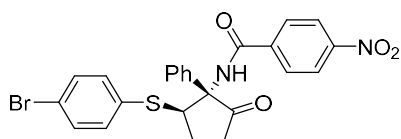

**3oa-anti**

Purified by column chromatography (silica gel, EtOAc/Petroleum ether: 1/5) to afford the title compound (87% yield, 89 mg) as a yellow solid. mp: 172 °C. <sup>1</sup>H NMR (500 MHz, CDCl<sub>3</sub>) δ 8.23 (d, *J* = 8.4 Hz, 2H), 7.75 (d, *J* = 8.4 Hz, 2H), 7.47 – 7.36 (m, 5H), 7.29 (d, *J* = 8.2 Hz, 2H), 7.22 (d, *J* = 8.1 Hz, 2H), 6.72 (brs, 1H), 5.04 – 4.97 (m, 1H), 2.94 – 2.82 (m, 1H), 2.69 – 2.60 (m, 1H), 2.57 – 2.47 (m, 1H), 2.03 – 1.90 (m, 1H). <sup>13</sup>C NMR (125 MHz, CDCl<sub>3</sub>) δ 211.8, 165.4, 149.9, 138.9, 134.9, 134.1, 133.0, 132.3, 129.4, 129.0, 128.3, 127.4, 124.0, 121.4, 71.4, 51.4, 37.0, 26.5. HRMS (ESI) m/z: [M + H]<sup>+</sup> Calcd for C<sub>24</sub>H<sub>20</sub>BrN<sub>2</sub>O<sub>4</sub>S 511.0322; Found 511.0320.

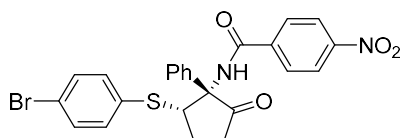

**3oa-syn**

Purified by column chromatography (silica gel, EtOAc/Petroleum ether: 1/5) to afford the title compound (80% yield, 82 mg) as a yellow solid. mp: 175 °C. <sup>1</sup>H NMR (400 MHz, CDCl<sub>3</sub>) δ 8.25 (d, *J* = 8.8 Hz, 2H), 7.87 (d, *J* = 8.8 Hz, 2H), 7.56 (d, *J* = 8.2 Hz, 2H), 7.44 – 7.38 (m, 3H), 7.38 – 7.30 (m, 5H), 5.36 (d, *J* = 4.6 Hz, 1H), 2.63 – 2.48 (m, 1H), 2.40 – 2.19 (m, 2H), 2.14 – 2.01 (m, 1H). <sup>13</sup>C NMR (100 MHz, CDCl<sub>3</sub>) δ 211.1, 164.3, 149.9, 139.4, 134.7, 134.7, 132.5, 132.3, 129.2, 129.1, 128.4, 127.4, 123.9, 122.4, 70.3, 51.9, 31.0, 23.7. HRMS (ESI) *m/z*: [M + H]<sup>+</sup> Calcd for C<sub>24</sub>H<sub>20</sub>BrN<sub>2</sub>O<sub>4</sub>S 511.0322; Found 511.0318.

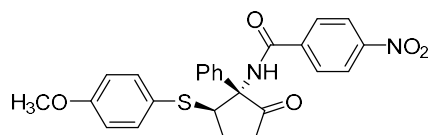

**3pa-anti**

Purified by column chromatography (silica gel, EtOAc/Petroleum ether: 1/8) to afford the title compound (46% yield, 43 mg) as a yellow solid. mp: 173 °C. <sup>1</sup>H NMR (400 MHz, CDCl<sub>3</sub>) δ 8.24 (d, *J* = 8.8 Hz, 2H), 7.78 (d, *J* = 8.9 Hz, 2H), 7.49 – 7.42 (m, 5H), 7.31 (d, *J* = 8.8 Hz, 2H), 6.72 (d, *J* = 8.7 Hz, 2H), 6.65 (brs, 1H), δ 4.91 – 4.79 (m, 1H), 3.70 (s, 3H), 2.93 – 2.78 (m, 1H), 2.72 – 2.58 (m, 1H), 2.56 – 2.44 (m, 1H), 2.07 – 1.91 (m, 1H). <sup>13</sup>C NMR (125 MHz, CDCl<sub>3</sub>) δ 212.0, 165.2, 159.6, 150.0, 139.2, 135.1, 134.7, 129.3, 129.0, 128.4, 127.5, 125.0, 123.9, 114.9, 71.3, 55.4, 52.9, 36.9, 26.7. HRMS (ESI) *m/z*: [M + H]<sup>+</sup> Calcd for C<sub>25</sub>H<sub>23</sub>N<sub>2</sub>O<sub>5</sub>S 463.1322; Found 463.1324.

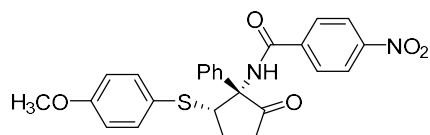

**3pa-syn**

Purified by column chromatography (silica gel, EtOAc/Petroleum ether: 1/8) to afford the title compound (50% yield, 46 mg) as a yellow solid. mp: 136 °C. <sup>1</sup>H NMR (400 MHz, CDCl<sub>3</sub>) δ 8.29 – 8.20 (m, 2H), 7.90 (d, *J* = 8.8 Hz, 2H), 7.55 (d, *J* = 7.0 Hz, 2H), 7.43 (d, *J* = 8.8 Hz, 2H), 7.40 – 7.28 (m, 4H), 6.84 (d, *J* = 8.7 Hz, 2H), 5.23 (d, *J* = 4.6 Hz, 1H), 3.79 (s, 3H), 2.65 – 2.49 (m, 1H), 2.41 – 2.26 (m, 1H), 2.25 – 2.11 (m, 1H), 2.08 – 1.98 (m, 1H). <sup>13</sup>C NMR (100 MHz, CDCl<sub>3</sub>) δ 211.5, 164.4, 160.2, 149.8, 139.7, 136.1, 135.0, 129.1, 129.0, 128.5, 127.5, 123.8, 123.1, 115.0, 70.4, 55.5, 52.4, 31.0, 23.3. HRMS (ESI) *m/z*: [M + H]<sup>+</sup> Calcd for C<sub>25</sub>H<sub>23</sub>N<sub>2</sub>O<sub>5</sub>S 463.1322; Found 463.1329.

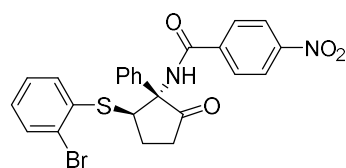

**3qa-anti**

Purified by column chromatography (silica gel, EtOAc/Petroleum ether: 1/) to afford the title compound (69% yield, 71 mg) as a yellow solid. mp: 155 °C. <sup>1</sup>H NMR (400 MHz, CDCl<sub>3</sub>) δ 8.25 (d, *J* = 8.8 Hz, 2H), 7.84 (d, *J* = 8.8 Hz, 2H), 7.54 (dd, *J* = 7.9, 1.5 Hz, 1H), 7.51 – 7.42 (m, 6H), 7.19 – 7.10 (m, 1H), 7.09 – 7.00 (m, 1H), 6.77 (brs, 1H), 5.04 – 4.90 (m, 1H), 3.01 – 2.82 (m, 1H), 2.76 – 2.63 (m, 1H), 2.63 – 2.51 (m, 1H), 2.17 – 1.98 (m, 1H). <sup>13</sup>C NMR (100 MHz, CDCl<sub>3</sub>) δ 211.6, 165.4, 150.0, 139.1, 135.8, 134.9, 133.7, 133.3, 129.5, 129.2, 128.9, 128.4, 128.1, 127.4, 127.2, 124.0, 71.0, 51.1, 37.0, 26.8. HRMS (ESI) *m/z*: [M + H]<sup>+</sup> Calcd for C<sub>24</sub>H<sub>20</sub>BrN<sub>2</sub>O<sub>4</sub>S 511.0322; Found 511.0318.

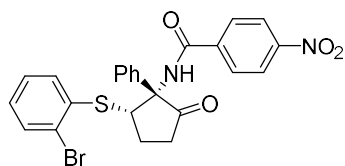

**3qa-syn**

Purified by column chromatography (silica gel, EtOAc/Petroleum ether: 1/) to afford the title compound (95% yield, 97 mg) as a yellow solid. mp: 140 °C. <sup>1</sup>H NMR (500 MHz, CDCl<sub>3</sub>) δ 8.22 (d, *J* = 8.7 Hz, 2H), 7.87 (d, *J* = 8.9 Hz, 2H), 7.62 – 7.57 (m, 3H), 7.53 (dd, *J* = 8.0, 1.4 Hz, 1H), 7.42 (brs, 1H), 7.38 (t, *J* = 7.5 Hz, 2H), 7.34 – 7.30 (m, 1H), 7.29 – 7.27 (m, 1H), 7.13 – 7.07 (m, 1H), 5.52 (d, *J* = 4.6 Hz, 1H), 2.72 – 2.61 (m, 1H), 2.43 – 2.25 (m, 2H), 2.09 – 1.96 (m, 1H). <sup>13</sup>C NMR (125 MHz, CDCl<sub>3</sub>) δ 211.1, 164.3, 149.8, 139.4, 134.7, 134.5, 134.4, 133.6, 129.3, 129.1, 129.0, 128.5, 128.3, 128.1, 127.5, 123.8, 70.2, 51.5, 31.3, 23.7. HRMS (ESI) *m/z*: [M + H]<sup>+</sup> Calcd for C<sub>24</sub>H<sub>20</sub>BrN<sub>2</sub>O<sub>4</sub>S 511.0322; Found 511.0321.

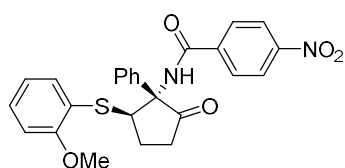

**3ra-anti**

Purified by column chromatography (silica gel, EtOAc/Petroleum ether: 1/5) to afford the title compound (63% yield, 58 mg) as a yellow solid. mp: 135 °C. <sup>1</sup>H NMR (400 MHz, CDCl<sub>3</sub>) δ 8.23 (d, *J* = 8.8 Hz, 2H), 7.78 (d, *J* = 8.8 Hz, 2H), 7.50 – 7.40 (m, 5H), 7.38 (dd, *J* = 7.6, 1.7 Hz, 1H), 7.22 – 7.17 (m, 1H), 6.86 – 6.79 (m, 1H), 6.76 (dd, *J* = 8.3, 1.2 Hz, 1H), 6.73 (brs, 1H), 5.10 – 4.97 (m, 1H), 3.67 (s, 3H), 2.93 – 2.79 (m, 1H), 2.73 – 2.58 (m, 1H), 2.58 – 2.47 (m, 1H), 2.11 – 1.92 (m, 1H). <sup>13</sup>C NMR (100 MHz, CDCl<sub>3</sub>) δ 211.9, 164.8, 158.7, 149.8, 139.1, 135.0, 134.0, 129.4, 129.2, 128.9, 128.3, 127.3, 123.8, 122.0, 121.0, 111.2, 71.0, 55.8, 49.5, 36.9, 26.6. HRMS (ESI) *m/z*: [M + Na]<sup>+</sup> Calcd for C<sub>25</sub>H<sub>22</sub>N<sub>2</sub>O<sub>5</sub>SNa 485.1142; Found 485.1140.

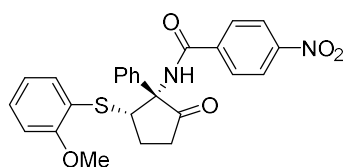

**3ra-syn**

Purified by column chromatography (silica gel, EtOAc/Petroleum ether: 1/5) to afford the title compound (48% yield, 44 mg) as a yellow oil. <sup>1</sup>H NMR (400 MHz, CDCl<sub>3</sub>) δ 8.23 (d, *J* = 8.8 Hz, 2H), 7.90 (d, *J* = 8.8 Hz, 2H), 7.54 (d, *J* = 7.1 Hz, 2H), 7.47 – 7.40 (m, 2H), 7.35 (t, *J* = 7.3 Hz, 2H), 7.32 – 7.28 (m, 1H), 7.28 – 7.17 (m, 1H), 6.90 – 6.79 (m, 2H), 5.43 (d, *J* = 2.8 Hz, 1H), 3.86 (s, 3H), 2.64 – 2.50 (m, 1H), 2.40 – 2.19 (m, 2H), 2.07 – 1.95 (m, 1H). <sup>13</sup>C NMR (100 MHz, CDCl<sub>3</sub>) δ 211.3, 164.2, 159.7, 149.7, 139.5, 135.3, 134.9, 129.9, 128.8, 128.7, 128.4, 127.4, 123.7, 121.2, 120.5, 111.2, 70.1, 55.9, 49.7, 31.6, 23.8. HRMS (ESI) *m/z*: [M + H]<sup>+</sup> Calcd for C<sub>25</sub>H<sub>23</sub>N<sub>2</sub>O<sub>5</sub>S 463.1322; Found 463.1323.

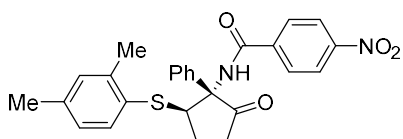

**3sa-anti**

Purified by column chromatography (silica gel, EtOAc/Petroleum ether: 1/8) to afford the title compound (82% yield,

76 mg) as a yellow solid. mp: 162 °C. <sup>1</sup>H NMR (500 MHz, CDCl<sub>3</sub>) δ 8.25 (d, *J* = 8.8 Hz, 2H), 7.80 (d, *J* = 8.8 Hz, 2H), 7.53 – 7.38 (m, 5H), 7.27 (d, *J* = 7.9 Hz, 1H), 6.97 (brs, 1H), 6.80 (d, *J* = 8.0 Hz, 1H), 6.65 (s, 1H), 4.85 – 4.73 (m, 1H), 2.94 – 2.77 (m, 1H), 2.71 – 2.59 (m, 1H), 2.57 – 2.48 (m, 1H), 2.31 (s, 3H), 2.21 (s, 3H), 2.13 – 2.00 (m, 1H). <sup>13</sup>C NMR (100 MHz, CDCl<sub>3</sub>) δ 211.8, 165.2, 149.9, 140.2, 139.2, 138.1, 135.1, 133.7, 131.7, 130.1, 129.3, 129.0, 128.4, 127.5, 127.4, 123.9, 71.2, 51.5, 36.9, 26.9, 21.0, 20.7. HRMS (ESI) *m/z*: [M + H]<sup>+</sup> Calcd for C<sub>26</sub>H<sub>25</sub>N<sub>2</sub>O<sub>4</sub>S 461.1530; Found 461.1528.

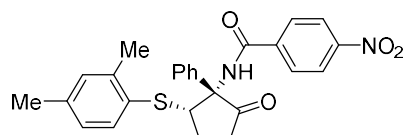

**3sa-syn**

Purified by column chromatography (silica gel, EtOAc/Petroleum ether: 1/8) to afford the title compound (80% yield, 74 mg) as a yellow solid. mp: 167 °C. <sup>1</sup>H NMR (400 MHz, CDCl<sub>3</sub>) δ 8.25 (d, *J* = 8.8 Hz, 2H), 7.89 (d, *J* = 8.8 Hz, 2H), 7.56 (d, *J* = 8.1 Hz, 2H), 7.41 – 7.27 (m, 5H), 7.03 (brs, 1H), 6.96 (dd, *J* = 7.9, 2.0 Hz, 1H), 5.29 (d, *J* = 4.6 Hz, 1H), 2.65 – 2.51 (m, 1H), 2.43 (s, 3H), 2.38 – 2.30 (m, 1H), 2.28 (s, 3H), 2.27 – 2.09 (m, 1H), 2.00 – 1.90 (m, 1H). <sup>13</sup>C NMR (100 MHz, CDCl<sub>3</sub>) δ 211.6, 164.4, 149.8, 141.8, 139.7, 138.7, 135.0, 134.9, 131.7, 129.1, 129.0, 128.5, 128.1, 127.6, 127.5, 123.8, 70.5, 50.8, 31.0, 23.2, 21.2, 20.9. HRMS (ESI) *m/z*: [M + Na]<sup>+</sup> Calcd for C<sub>26</sub>H<sub>24</sub>N<sub>2</sub>O<sub>4</sub>SNa 483.1373; Found 483.1380.

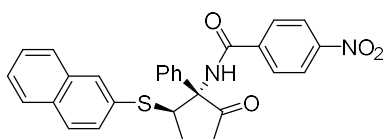

**3ta-anti**

Purified by column chromatography (silica gel, EtOAc/Petroleum ether: 1/8) to afford the title compound (65% yield, 63 mg) as a yellow solid. mp: 164 °C. <sup>1</sup>H NMR (500 MHz, CDCl<sub>3</sub>) δ 8.02 (d, *J* = 8.7 Hz, 2H), 7.84 (s, 1H), 7.71 – 7.64 (m, 1H), 7.62 (d, *J* = 8.6 Hz, 1H), 7.59 – 7.52 (m, 3H), 7.52 – 7.44 (m, 3H), 7.44 – 7.37 (m, 5H), 6.59 (brs, 1H), 5.25 – 5.11 (m, 1H), 2.98 – 2.86 (m, 1H), 2.72 – 2.64 (m, 1H), 2.63 – 2.54 (m, 1H), 2.08 – 1.96 (m, 1H). <sup>13</sup>C NMR (125 MHz, CDCl<sub>3</sub>) δ 211.9, 165.2, 149.8, 138.8, 135.1, 133.7, 132.3, 132.2, 130.1, 129.4, 129.0, 128.9, 128.2, 127.7, 127.6, 127.3, 126.9, 126.5, 123.7, 71.6, 51.0, 37.0, 26.4. HRMS (ESI) *m/z*: [M + H]<sup>+</sup> Calcd for C<sub>28</sub>H<sub>23</sub>N<sub>2</sub>O<sub>4</sub>S 483.1373; Found 483.1380.

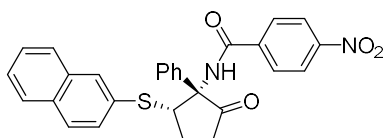

**3ta-syn**

Purified by column chromatography (silica gel, EtOAc/Petroleum ether: 1/10) to afford the title compound (49% yield, 47 mg) as a white solid. mp: 149 °C. <sup>1</sup>H NMR (400 MHz, CDCl<sub>3</sub>) δ 8.15 (d, *J* = 8.8 Hz, 2H), 7.91 (brs, 1H), 7.85 – 7.75 (m, 4H), 7.73 – 7.66 (m, 1H), 7.63 – 7.56 (m, 2H), 7.58 – 7.55 (m, 1H), 7.52 – 7.42 (m, 2H), 7.42 – 7.36 (m, 3H), 7.37 – 7.26 (m, 1H), 5.50 (d, *J* = 4.1 Hz, 1H), 2.68 – 2.53 (m, 1H), 2.42 – 2.32 (m, 1H), 2.32 – 2.22 (m, 1H), 2.19 – 2.07 (m, 1H). <sup>13</sup>C NMR (100 MHz, CDCl<sub>3</sub>) δ 211.4, 164.3, 149.8, 139.3, 134.9, 133.7, 132.7, 132.3, 130.3, 130.1, 129.2, 129.1, 129.0, 128.3, 127.8, 127.5, 127.5, 126.8, 126.7, 123.7, 70.5, 51.4, 31.1, 23.7. HRMS (ESI) *m/z*: [M + H]<sup>+</sup> Calcd for C<sub>28</sub>H<sub>23</sub>N<sub>2</sub>O<sub>4</sub>S 483.1373; Found 483.1365.

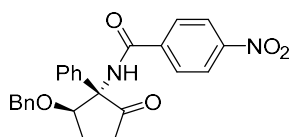

**3ua-anti**

Purified by column chromatography (silica gel, EtOAc/Petroleum ether: 1/10) to afford the title compound (26% yield, 22 mg) as a colorless oil.  $^1\text{H NMR}$  (400 MHz,  $\text{CDCl}_3$ )  $\delta$  8.27 (d,  $J = 8.8$  Hz, 2H), 7.83 (d,  $J = 8.8$  Hz, 2H), 7.61 – 7.54 (m, 2H), 7.46 – 7.38 (m, 3H), 7.25 – 7.11 (m, 5H), 6.51 (brs, 1H), 5.27 – 5.17 (m, 1H), 4.75 (d,  $J = 12.2$  Hz, 1H), 4.63 (d,  $J = 12.2$  Hz, 1H), 2.83 – 2.69 (m, 1H), 2.69 – 2.55 (m, 1H), 2.53 – 2.41 (m, 1H), 1.97 – 1.81 (m, 1H).  $^{13}\text{C NMR}$  (125 MHz,  $\text{CDCl}_3$ )  $\delta$  210.8, 164.9, 150.0, 139.1, 138.4, 134.6, 129.1, 129.0, 128.6, 128.5, 128.4, 127.9, 127.7, 123.9, 80.0, 72.6, 71.0, 35.9, 24.8. HRMS (ESI)  $m/z$ :  $[\text{M} + \text{H}]^+$  Calcd for  $\text{C}_{25}\text{H}_{23}\text{N}_2\text{O}_5$  431.1601; Found 431.1596.

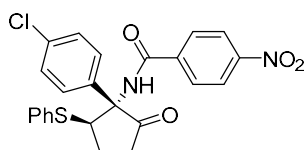

**3ab-anti**

Purified by column chromatography (silica gel, EtOAc/Petroleum ether: 1/5) to afford the title compound (56% yield, 52 mg) as a yellow solid. mp: 176 °C.  $^1\text{H NMR}$  (400 MHz,  $\text{CDCl}_3$ )  $\delta$  8.28 (d,  $J = 8.7$  Hz, 2H), 7.77 (d,  $J = 8.8$  Hz, 2H), 7.49 (d,  $J = 8.7$  Hz, 2H), 7.45 – 7.37 (m, 4H), 7.27 – 7.19 (m, 3H), 6.55 (brs, 1H), 5.17 – 4.98 (m, 1H), 3.04 – 2.87 (m, 1H), 2.74 – 2.64 (m, 1H), 2.64 – 2.51 (m, 1H), 2.11 – 1.92 (m, 1H).  $^{13}\text{C NMR}$  (100 MHz,  $\text{CDCl}_3$ )  $\delta$  211.5, 165.4, 150.0, 138.9, 135.5, 134.7, 133.4, 131.5, 129.4, 129.2, 129.0, 128.4, 127.5, 123.2, 71.0, 51.3, 36.9, 26.6. HRMS (ESI)  $m/z$ :  $[\text{M} + \text{Na}]^+$  Calcd for  $\text{C}_{24}\text{H}_{19}\text{ClN}_2\text{O}_4\text{SNa}$  489.0646; Found 489.0643.

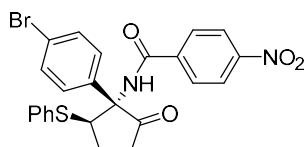

**3ac-anti**

Purified by column chromatography (silica gel, EtOAc/Petroleum ether: 1/5) to afford the title compound (45% yield, 46 mg) as a yellow solid. mp: 184 °C.  $^1\text{H NMR}$  (400 MHz,  $\text{CDCl}_3$ )  $\delta$  8.24 (d,  $J = 8.8$  Hz, 2H), 7.72 (d,  $J = 8.8$  Hz, 2H), 7.59 (d,  $J = 8.7$  Hz, 2H), 7.42 – 7.36 (m, 2H), 7.35 – 7.28 (m, 2H), 7.23 – 7.13 (m, 3H), 6.53 (brs, 1H), 5.09 – 4.99 (m, 1H), 3.02 – 2.84 (m, 1H), 2.74 – 2.50 (m, 2H), 2.12 – 1.87 (m, 1H).  $^{13}\text{C NMR}$  (126 MHz,  $\text{CDCl}_3$ )  $\delta$  211.3, 165.5, 150.0, 138.9, 134.7, 134.0, 132.1, 131.5, 129.4, 129.3, 128.4, 127.5, 123.9, 123.7, 71.1, 51.3, 36.9, 26.7. HRMS (ESI)  $m/z$ :  $[\text{M} + \text{H}]^+$  Calcd for  $\text{C}_{24}\text{H}_{20}\text{BrN}_2\text{O}_4\text{S}$  511.0322; Found 511.0318.

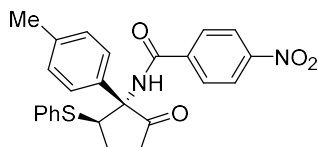

**3ad-anti**

Purified by column chromatography (silica gel, EtOAc/Petroleum ether: 1/5) to afford the title compound (87% yield, 78 mg) as a white solid. mp: 156 °C.  $^1\text{H NMR}$  (400 MHz,  $\text{CDCl}_3$ )  $\delta$  8.24 (d,  $J = 8.3$  Hz, 2H), 7.75 (d,  $J = 8.3$  Hz, 2H), 7.39 (d,  $J = 7.8$  Hz, 2H), 7.34 – 7.25 (m, 4H), 7.23 – 7.09 (m, 3H), 6.60 (brs, 1H), 5.08 – 4.98 (m, 1H), 2.99 – 2.81 (m, 1H), 2.71 – 2.62 (m, 1H), 2.60 – 2.50 (m, 1H), 2.40 (s, 3H), 2.11 – 1.87 (m, 1H).  $^{13}\text{C NMR}$  (125 MHz,  $\text{CDCl}_3$ )  $\delta$  212.1, 165.4, 150.0, 139.5, 139.3, 135.1, 132.2, 131.5, 129.7, 129.3, 128.4, 127.3, 127.2, 124.0, 71.3, 51.5, 37.0, 26.8, 21.3. HRMS (ESI)  $m/z$ :  $[\text{M} + \text{H}]^+$  Calcd for  $\text{C}_{25}\text{H}_{23}\text{N}_2\text{O}_4\text{S}$  447.1373; Found 447.1370.



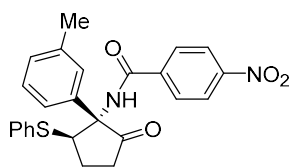

**3ae-anti**

Purified by column chromatography (silica gel, EtOAc/Petroleum ether: 1/5) to afford the title compound (69% yield, 62 mg) as a yellow solid. mp: 152 °C. <sup>1</sup>H NMR (500 MHz, CDCl<sub>3</sub>) δ 8.23 (d, *J* = 8.7 Hz, 2H), 7.76 (d, *J* = 8.8 Hz, 2H), 7.37 (t, *J* = 6.6 Hz, 2H), 7.34 (d, *J* = 7.7 Hz, 1H), 7.25 (d, *J* = 7.7 Hz, 1H), 7.20 (t, *J* = 8.2 Hz, 3H), 7.18 – 7.12 (m, 2H), 6.66 (brs, 1H), 5.07 – 5.00 (m, 1H), 2.95 – 2.83 (m, 1H), 2.71 – 2.62 (m, 1H), 2.59 – 2.49 (m, 1H), 2.42 (s, 3H), 2.05 – 1.92 (m, 1H). <sup>13</sup>C NMR (125 MHz, CDCl<sub>3</sub>) δ 212.2, 165.4, 149.9, 139.2, 138.8, 135.1, 135.0, 131.5, 130.2, 129.3, 128.8, 128.4, 127.9, 127.3, 124.5, 123.9, 71.4, 51.4, 37.1, 26.7, 21.9. HRMS (ESI) *m/z*: [M + Na]<sup>+</sup> Calcd for C<sub>25</sub>H<sub>22</sub>N<sub>2</sub>O<sub>4</sub>SNa 469.1192; Found 469.1187.

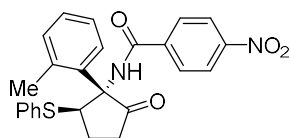

**3af-anti**

Purified by column chromatography (silica gel, EtOAc/Petroleum ether: 1/5) to afford the title compound (26% yield, 23 mg) as a yellow solid. mp: 123 °C. <sup>1</sup>H NMR (400 MHz, CDCl<sub>3</sub>) δ 8.28 (d, *J* = 8.9 Hz, 2H), 7.86 (d, *J* = 8.8 Hz, 2H), 7.36 – 7.30 (m, 4H), 7.26 – 7.16 (m, 4H), 7.16 – 7.09 (m, 1H), 6.95 (s, 1H), 5.07 – 4.96 (m, 1H), 3.01 – 2.81 (m, 1H), 2.78 (s, 3H), 2.77 – 2.60 (m, 2H), 2.28 – 2.05 (m, 1H). <sup>13</sup>C NMR (100 MHz, CDCl<sub>3</sub>) δ 213.1, 165.1, 150.0, 139.4, 137.4, 135.5, 133.9, 133.6, 130.9, 129.3, 129.2, 128.7, 128.3, 127.1, 126.2, 124.1, 72.3, 52.7, 37.5, 27.9, 23.4. HRMS (ESI) *m/z*: [M + Na]<sup>+</sup> Calcd for C<sub>25</sub>H<sub>22</sub>N<sub>2</sub>O<sub>4</sub>Na 469.1192; Found 469.1196.

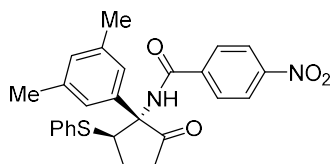

**3ag-anti**

Purified by column chromatography (silica gel, EtOAc/Petroleum ether: 1/5) to afford the title compound (72% yield, 66 mg) as a yellow solid. mp: 125 °C. <sup>1</sup>H NMR (400 MHz, CDCl<sub>3</sub>) δ 8.25 (d, *J* = 8.8 Hz, 2H), 7.77 (d, *J* = 8.8 Hz, 2H), 7.46 – 7.35 (m, 2H), 7.25 – 7.12 (m, 3H), 7.07 (s, 1H), 6.96 (s, 2H), 6.63 (s, 1H), 5.08 – 4.97 (m, 1H), 2.97 – 2.80 (m, 1H), 2.74 – 2.62 (m, 1H), 2.58 – 2.47 (m, 1H), 2.38 (s, 6H), 2.08 – 1.89 (m, 1H). <sup>13</sup>C NMR (100 MHz, CDCl<sub>3</sub>) δ 212.4, 165.4, 149.9, 139.3, 138.7, 135.1, 135.1, 131.5, 131.1, 129.3, 128.4, 127.3, 125.0, 124.0, 71.4, 51.3, 37.1, 26.7, 21.8. HRMS (ESI) *m/z*: [M + H]<sup>+</sup> Calcd for C<sub>26</sub>H<sub>25</sub>N<sub>2</sub>O<sub>4</sub>S 461.1530; Found 461.1528.

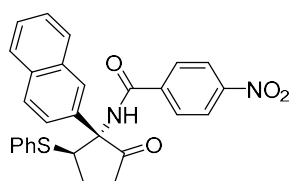

**3ah-anti**

Purified by column chromatography (silica gel, EtOAc/Petroleum ether: 1/5) to afford the title compound (59% yield, 57 mg) as a yellow oil. <sup>1</sup>H NMR (500 MHz, CDCl<sub>3</sub>) δ 8.19 (d, *J* = 8.8 Hz, 2H), 7.92 (d, *J* = 8.7 Hz, 1H), 7.90 – 7.83

(m, 2H), 7.81 (d,  $J = 2.0$  Hz, 1H), 7.74 (d,  $J = 8.8$  Hz, 2H), 7.63 – 7.51 (m, 3H), 7.45 – 7.36 (m, 2H), 7.24 – 7.12 (m, 3H), 6.82 (brs, 1H), 5.15 – 5.08 (m, 1H), 3.02 – 2.89 (m, 1H), 2.83 – 2.67 (m, 1H), 2.67 – 2.50 (m, 1H), 2.15 – 1.95 (m, 1H).  $^{13}\text{C}$  NMR (150 MHz,  $\text{CDCl}_3$ )  $\delta$  211.9, 165.5, 149.9, 139.1, 135.1, 133.2, 132.7, 132.2, 131.4, 129.3, 128.8, 128.5, 128.4, 127.8, 127.4, 127.4, 127.3, 127.1, 124.6, 123.8, 71.6, 51.6, 37.1, 26.8. HRMS (ESI)  $m/z$ :  $[\text{M} + \text{H}]^+$  Calcd for  $\text{C}_{28}\text{H}_{22}\text{N}_2\text{O}_4\text{S}$  483.1373; Found 483.1369.

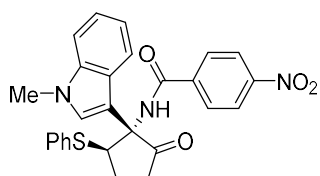

**5-anti**

Purified by column chromatography (silica gel, EtOAc/Petroleum ether: 1/5) to afford the title compound (25% yield, 24 mg) as a red solid. mp: 126 °C.  $^1\text{H}$  NMR (400 MHz,  $\text{CDCl}_3$ )  $\delta$  8.23 (d,  $J = 8.8$  Hz, 2H), 8.03 (d,  $J = 8.1$  Hz, 1H), 7.79 (d,  $J = 8.8$  Hz, 2H), 7.50 (s, 1H), 7.44 – 7.36 (m, 3H), 7.35 – 7.28 (m, 1H), 7.23 – 7.10 (m, 4H), 6.87 (s, 1H), 5.17 – 5.05 (m, 1H), 3.86 (s, 3H), 2.92 – 2.72 (m, 1H), 2.66 – 2.53 (m, 2H), 2.43 – 2.29 (m, 1H).  $^{13}\text{C}$  NMR (125 MHz,  $\text{CDCl}_3$ )  $\delta$  207.1, 164.6, 149.9, 139.3, 137.4, 135.2, 131.7, 129.5, 129.3, 128.3, 127.4, 126.0, 123.9, 122.9, 121.4, 120.7, 110.1, 106.1, 68.9, 51.9, 35.7, 33.4, 27.0. HRMS (ESI)  $m/z$ :  $[\text{M} + \text{Na}]^+$  Calcd for  $\text{C}_{27}\text{H}_{23}\text{N}_3\text{O}_4\text{SNa}$  508.1301; Found 508.1309.

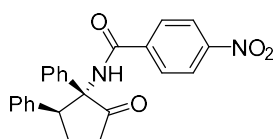

**8a-anti**

Purified by column chromatography (silica gel, EtOAc/Petroleum ether: 1/10) to afford the title compound (85% yield, 68 mg) as a white solid. mp: 201 °C.  $^1\text{H}$  NMR (400 MHz,  $\text{CDCl}_3$ )  $\delta$  8.35 – 8.22 (m, 2H), 7.95 (t,  $J = 8.1$  Hz, 2H), 7.34 – 7.19 (m, 2H), 7.19 – 7.12 (m, 4H), 6.78 (d,  $J = 7.4$  Hz, 2H), 6.72 – 6.55 (m, 3H), 4.81 – 4.70 (m, 1H), 3.08 – 2.90 (m, 1H), 2.83 – 2.69 (m, 1H), 2.35 – 2.24 (m, 1H), 2.24 – 2.10 (m, 1H).  $^{13}\text{C}$  NMR (125 MHz,  $\text{CDCl}_3$ )  $\delta$  215.2, 165.4, 150.0, 139.6, 138.3, 135.8, 128.8, 128.7, 128.5, 128.4, 128.1, 127.4, 127.2, 124.1, 73.1, 48.3, 37.4, 22.7. HRMS (ESI)  $m/z$ :  $[\text{M} + \text{H}]^+$  Calcd for  $\text{C}_{24}\text{H}_{21}\text{N}_2\text{O}_4$  401.1496; Found 401.1489.

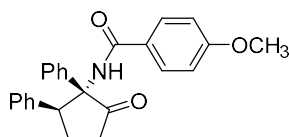

**8b-anti**

Purified by column chromatography (silica gel, EtOAc/Petroleum ether: 1/8) to afford the title compound (57% yield, 44 mg) as a colorless oil.  $^1\text{H}$  NMR (500 MHz,  $\text{CDCl}_3$ )  $\delta$  7.77 (d,  $J = 8.8$  Hz, 2H), 7.25 – 7.18 (m, 2H), 7.17 – 7.11 (m, 4H), 6.94 (d,  $J = 8.8$  Hz, 2H), 6.79 (d,  $J = 6.9$  Hz, 2H), 6.63 (d,  $J = 7.4$  Hz, 2H), 6.49 (brs, 1H), 4.83 – 4.76 (m, 1H), 3.85 (s, 3H), 3.12 – 3.01 (m, 1H), 2.82 – 2.69 (m, 1H), 2.32 – 2.23 (m, 1H), 2.21 – 2.08 (m, 1H).  $^{13}\text{C}$  NMR (125 MHz,  $\text{CDCl}_3$ )  $\delta$  216.2, 166.7, 162.7, 138.7, 136.4, 129.1, 128.9, 128.4, 128.3, 128.0, 127.2, 127.1, 126.2, 114.0, 72.5, 55.6, 48.3, 37.5, 22.6. HRMS (ESI)  $m/z$ :  $[\text{M} + \text{H}]^+$  Calcd for  $\text{C}_{25}\text{H}_{24}\text{NO}_3$  386.1751; Found 386.1755.

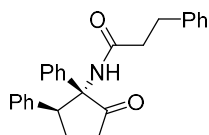

**8c-anti**

Purified by column chromatography (silica gel, EtOAc/Petroleum ether: 1/10) to afford the title compound (73% yield, 71 mg) as a white solid. mp: 114 °C. <sup>1</sup>H NMR (400 MHz, CDCl<sub>3</sub>) δ 7.36 – 7.23 (m, 5H), 7.20 (t, *J* = 7.4 Hz, 2H), 7.14 – 7.09 (m, 3H), 7.07 (d, *J* = 7.6 Hz, 1H), 6.58 (d, *J* = 6.9 Hz, 2H), 6.48 – 6.40 (m, 2H), 6.00 (brs, 1H), 4.62 – 4.52 (m, 1H), 3.18 – 3.04 (m, 1H), 3.04 – 2.97 (m, 1H), 2.97 – 2.88 (m, 1H), 2.73 – 2.66 (m, 1H), 2.66 – 2.59 (m, 2H), 2.23 – 2.14 (m, 1H), 2.14 – 1.99 (m, 1H). <sup>13</sup>C NMR (100 MHz, CDCl<sub>3</sub>) δ 216.1, 172.0, 140.6, 138.4, 135.9, 128.8, 128.7, 128.6, 128.2, 128.1, 127.8, 127.1, 127.0, 126.4, 72.4, 48.4, 37.9, 37.4, 31.2, 22.5. HRMS (ESI) *m/z*: [M + H]<sup>+</sup> Calcd for C<sub>26</sub>H<sub>26</sub>NO<sub>2</sub> 384.1958; Found 384.1961.

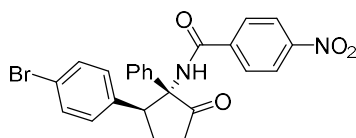

**8d-anti**

Purified by column chromatography (silica gel, EtOAc/Petroleum ether: 1/5) to afford the title compound (86% yield, 82 mg) as a white solid. mp: 122 °C. <sup>1</sup>H NMR (400 MHz, CDCl<sub>3</sub>) δ 8.27 (d, *J* = 8.8 Hz, 2H), 7.94 (d, *J* = 8.8 Hz, 2H), 7.29 (d, *J* = 8.4 Hz, 3H), 7.18 (d, *J* = 8.2 Hz, 2H), 6.71 – 6.58 (m, 5H), 4.76 – 4.69 (m, 1H), 3.07 – 2.90 (m, 1H), 2.84 – 2.71 (m, 1H), 2.33 – 2.20 (m, 1H), 2.20 – 1.99 (m, 1H). <sup>13</sup>C NMR (100 MHz, CDCl<sub>3</sub>) δ 214.8, 165.5, 150.0, 139.3, 137.3, 135.5, 131.2, 130.5, 128.9, 128.7, 128.4, 127.1, 124.1, 121.4, 73.0, 47.8, 37.3, 22.8. HRMS (ESI) *m/z*: [M + H]<sup>+</sup> Calcd for C<sub>24</sub>H<sub>20</sub>BrN<sub>2</sub>O<sub>4</sub> 479.0601; Found 479.0607.

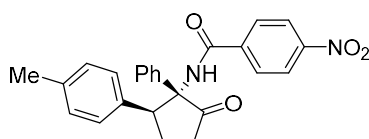

**8e-anti**

Purified by column chromatography (silica gel, EtOAc/Petroleum ether: 1/10) to afford the title compound (89% yield, 74 mg) as a white solid. mp: 160 °C. <sup>1</sup>H NMR (500 MHz, CDCl<sub>3</sub>) δ 8.30 (d, *J* = 8.8 Hz, 2H), 7.96 (d, *J* = 8.8 Hz, 2H), 7.28 (d, *J* = 7.4 Hz, 1H), 7.18 (t, *J* = 7.8 Hz, 2H), 6.98 (d, *J* = 7.8 Hz, 2H), 6.75 – 6.59 (m, 4H), 6.53 (brs, 1H), 4.77 – 4.69 (m, 1H), 3.15 – 2.91 (m, 1H), 2.81 – 2.72 (m, 1H), 2.31 (s, 3H), 2.29 – 2.21 (m, 1H), 2.18 – 2.07 (m, 1H). <sup>13</sup>C NMR (125 MHz, CDCl<sub>3</sub>) δ 215.4, 165.3, 149.9, 139.6, 137.0, 135.7, 135.1, 128.8, 128.7, 128.6, 128.4, 127.3, 124.0, 73.1, 47.9, 37.4, 22.8, 21.2. HRMS (ESI) *m/z*: [M + H]<sup>+</sup> Calcd for C<sub>25</sub>H<sub>23</sub>N<sub>2</sub>O<sub>4</sub> 415.1652; Found 415.1653.

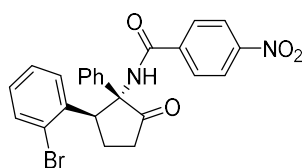

**8f-anti**

Purified by column chromatography (silica gel, EtOAc/Petroleum ether: 1/10) to afford the title compound (67% yield, 64 mg) as a white solid. mp: 215 °C. <sup>1</sup>H NMR (400 MHz, CDCl<sub>3</sub>) δ 8.25 (d, *J* = 8.7 Hz, 2H), 7.94 (d, *J* = 8.8 Hz, 2H), 7.55 (d, *J* = 6.7 Hz, 1H), 7.31 – 7.24 (m, 1H), 7.24 – 7.14 (m, 2H), 7.05 – 6.99 (m, 1H), 6.90 – 6.80 (m, 1H), 6.74 – 6.65 (m, 3H), 6.08 (d, *J* = 8.0 Hz, 1H), 5.34 – 5.25 (m, 1H), 3.22 – 3.07 (m, 1H), 2.83 – 2.70 (m, 1H), 2.35 – 2.24 (m, 1H), 2.21 – 2.05 (m, 1H). <sup>13</sup>C NMR (100 MHz, CDCl<sub>3</sub>) δ 215.4, 165.8, 149.8, 139.6, 138.1, 136.1, 133.0, 130.5, 128.8, 128.7, 128.6, 127.2, 126.6, 125.9, 123.9, 72.8, 47.4, 37.6, 24.3. HRMS (ESI) *m/z*: [M + H]<sup>+</sup> Calcd for C<sub>24</sub>H<sub>20</sub>BrN<sub>2</sub>O<sub>4</sub> 479.0601; Found 479.0602.

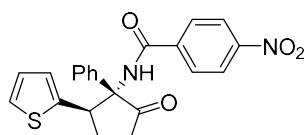

**8g-anti**

Purified by column chromatography (silica gel, EtOAc/Petroleum ether: 1/3) to afford the title compound (78% yield, 63 mg) as a white solid. mp: 171 °C. <sup>1</sup>H NMR (400 MHz, CDCl<sub>3</sub>) δ 8.31 (d, *J* = 8.8 Hz, 2H), 7.99 (d, *J* = 8.7 Hz, 2H), 7.31 – 7.27 (m, 1H), 7.21 (t, *J* = 7.6 Hz, 2H), 7.15 (d, *J* = 6.3 Hz, 1H), 6.89 (dd, *J* = 5.2, 3.5 Hz, 1H), 6.80 (d, *J* = 8.0 Hz, 2H), 6.65 (brs, 1H), 6.52 (d, *J* = 3.3 Hz, 1H), 4.99 – 4.93 (m, 1H), 3.08 – 2.93 (m, 1H), 2.81 – 2.68 (m, 1H), 2.54 – 2.39 (m, 1H), 2.22 – 1.99 (m, 1H). <sup>13</sup>C NMR (100 MHz, CDCl<sub>3</sub>) δ 214.1, 165.5, 150.0, 141.6, 139.6, 135.6, 128.9, 128.7, 128.4, 126.9, 126.8, 125.4, 124.4, 124.1, 72.8, 37.3, 24.5. HRMS (ESI) *m/z*: [M + H]<sup>+</sup> Calcd for C<sub>22</sub>H<sub>19</sub>N<sub>2</sub>O<sub>4</sub>S 407.1060; Found 407.1058.

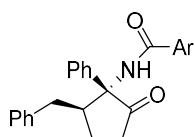

**8h-anti**

Purified by column chromatography (silica gel, EtOAc/Petroleum ether: 1/3) to afford the title compound (24% yield, 17 mg), **8h-anti**/**8h-syn** = 5/1. **8h-anti**: a yellow solid. mp: 145 °C. <sup>1</sup>H NMR (400 MHz, CDCl<sub>3</sub>) δ 7.58 (d, *J* = 7.1 Hz, 2H), 7.47 – 7.44 (m, 2H), 7.39 – 7.33 (m, 3H), 7.33 – 7.28 (m, 3H), 7.26 – 7.20 (m, 2H), 7.04 (d, *J* = 3.5 Hz, 1H), 6.46 (dd, *J* = 3.5, 1.8 Hz, 1H), 3.97 – 3.78 (m, 1H), 3.04 – 2.92 (m, 1H), 2.44 – 2.21 (m, 2H), 2.14 – 2.02 (m, 1H), 1.92 – 1.79 (m, 2H). <sup>13</sup>C NMR (100 MHz, CDCl<sub>3</sub>) δ 213.9, 157.3, 147.8, 144.2, 139.8, 136.8, 129.3, 129.0, 128.6, 128.5, 127.4, 126.5, 114.7, 112.3, 70.2, 43.3, 34.9, 31.5, 20.6. HRMS (ESI) *m/z*: [M + Na]<sup>+</sup> Calcd for C<sub>23</sub>H<sub>21</sub>NO<sub>3</sub>Na 382.1414; Found 382.1412. **8h-syn**: a yellow solid. mp: 165 °C. <sup>1</sup>H NMR (400 MHz, CDCl<sub>3</sub>) δ 7.49 – 7.36 (m, 4H), 7.25 – 7.17 (m, 4H), 7.17 – 7.12 (m, 2H), 7.06 (d, *J* = 6.5 Hz, 2H), 6.92 (brs, 1H), 6.52 (dd, *J* = 3.5, 1.8 Hz, 1H), 3.71 – 3.61 (m, 1H), 3.14 – 2.96 (m, 1H), 2.90 – 2.68 (m, 1H), 2.68 – 2.52 (m, 1H), 2.09 – 1.88 (m, 2H), 1.58 – 1.40 (m, 1H). <sup>13</sup>C NMR (100 MHz, CDCl<sub>3</sub>) δ 216.91, 158.07, 147.65, 144.28, 139.70, 136.88, 129.30, 129.02, 128.60, 128.41, 126.74, 126.20, 115.14, 112.50, 71.09, 45.67, 37.59, 37.40, 24.17. HRMS (ESI) *m/z*: [M + Na]<sup>+</sup> Calcd for C<sub>23</sub>H<sub>21</sub>NO<sub>3</sub>Na 382.1414; Found 382.1406.

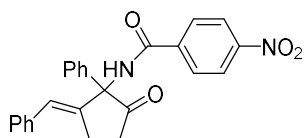

**10a**

Purified by column chromatography (silica gel, EtOAc/Petroleum ether: 1/5) to afford the title compound (90% yield, 74 mg) as a light yellow solid. mp: 155 °C. <sup>1</sup>H NMR (500 MHz, CDCl<sub>3</sub>) δ 8.27 (d, *J* = 8.6 Hz, 2H), 7.96 (d, *J* = 8.5 Hz, 2H), 7.72 – 7.62 (m, 2H), 7.46 – 7.35 (m, 7H), 7.32 – 7.27 (m, 1H), 6.98 (brs, 1H), 6.65 (brs, 1H), 3.42 – 3.30 (m, 1H), 3.03 – 2.90 (m, 1H), 2.83 – 2.73 (m, 1H), 2.59 – 2.49 (m, 1H). <sup>13</sup>C NMR (125 MHz, CDCl<sub>3</sub>) δ 210.4, 163.94, 150.0, 141.1, 138.9, 136.5, 136.4, 129.6, 129.5, 129.1, 128.6, 128.5, 127.9, 127.5, 126.3, 124.0, 70.8, 35.1, 25.4. HRMS (ESI) *m/z*: [M + H]<sup>+</sup> Calcd for C<sub>25</sub>H<sub>21</sub>N<sub>2</sub>O<sub>4</sub> 413.1496; Found 413.1491.

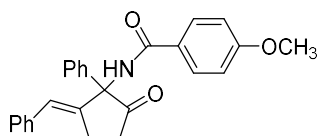

**10b**

Purified by column chromatography (silica gel, EtOAc/Petroleum ether: 1/5) to afford the title compound (40% yield, 32 mg) as a yellow oil.  $^1\text{H}$  NMR (400 MHz,  $\text{CDCl}_3$ )  $\delta$  7.77 (d,  $J = 8.8$  Hz, 2H), 7.69 (dd,  $J = 8.2, 1.7$  Hz, 2H), 7.48 – 7.32 (m, 7H), 7.29 – 7.22 (m, 1H), 6.92 (d,  $J = 8.8$  Hz, 2H), 6.79 (brs, 1H), 6.65 (brs, 1H), 3.85 (s, 3H), 3.46 – 3.30 (m, 1H), 2.99 – 2.89 (m, 1H), 2.88 – 2.78 (m, 1H), 2.59 – 2.47 (m, 1H).  $^{13}\text{C}$  NMR (100 MHz,  $\text{CDCl}_3$ )  $\delta$  211.2, 165.4, 162.7, 142.2, 137.2, 136.8, 129.4, 129.2, 129.1, 128.5, 128.0, 127.2, 125.9, 125.5, 114.0, 70.3, 55.6, 35.2, 25.5. HRMS (ESI)  $m/z$ :  $[\text{M} + \text{H}]^+$  Calcd for  $\text{C}_{26}\text{H}_{24}\text{NO}_3$  398.1751; Found 398.1753.

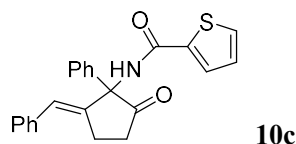

Purified by column chromatography (silica gel, EtOAc/Petroleum ether: 1/5) to afford the title compound (75% yield, 56 mg) as a yellow oil.  $^1\text{H}$  NMR (500 MHz,  $\text{CDCl}_3$ )  $\delta$  7.67 (d,  $J = 6.6$  Hz, 2H), 7.54 (d,  $J = 3.7$  Hz, 1H), 7.47 (d,  $J = 4.9$  Hz, 1H), 7.44 – 7.32 (m, 7H), 7.29 – 7.20 (m, 1H), 7.07 – 7.03 (m, 1H), 6.80 (brs, 1H), 6.67 (brs, 1H), 3.42 – 3.25 (m, 1H), 3.05 – 2.86 (m, 1H), 2.85 – 2.66 (m, 1H), 2.59 – 2.40 (m, 1H).  $^{13}\text{C}$  NMR (125 MHz,  $\text{CDCl}_3$ )  $\delta$  210.9, 157.0, 147.1, 144.4, 141.4, 136.6, 134.1, 129.4, 129.2, 129.1, 128.5, 127.9, 127.3, 126.4, 115.5, 112.5, 70.0, 35.0, 25.4. HRMS (ESI)  $m/z$ :  $[\text{M} + \text{H}]^+$  Calcd for  $\text{C}_{23}\text{H}_{20}\text{NO}_2\text{S}$  374.1209; Found 374.1213.

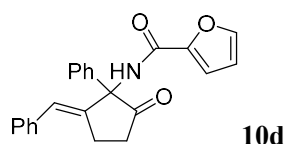

Purified by column chromatography (silica gel, EtOAc/Petroleum ether: 1/5) to afford the title compound (80% yield, 57 mg) as a yellow solid. mp: 124 °C.  $^1\text{H}$  NMR (400 MHz,  $\text{CDCl}_3$ )  $\delta$  7.68 (dd,  $J = 8.1, 1.7$  Hz, 2H), 7.45 (d,  $J = 1.8$  Hz, 1H), 7.43 – 7.39 (m, 5H), 7.39 – 7.34 (m, 2H), 7.26 (t,  $J = 7.1$  Hz, 1H), 7.11 (d,  $J = 3.5$  Hz, 1H), 7.09 (brs, 1H), 6.66 (brs, 1H), 6.51 (dd,  $J = 3.5, 1.8$  Hz, 1H), 3.44 – 3.29 (m, 1H), 3.06 – 2.85 (m, 1H), 2.85 – 2.65 (m, 1H), 2.65 – 2.39 (m, 1H).  $^{13}\text{C}$  NMR (125 MHz,  $\text{CDCl}_3$ )  $\delta$  210.9, 157.0, 147.1, 144.4, 141.4, 136.6, 134.0, 129.3, 129.2, 129.0, 128.4, 127.8, 127.2, 126.3, 115.5, 112.5, 70.0, 35.0, 25.4. HRMS (ESI)  $m/z$ :  $[\text{M} + \text{Na}]^+$  Calcd for  $\text{C}_{23}\text{H}_{19}\text{NO}_3\text{Na}$  380.1257; Found 380.1260.

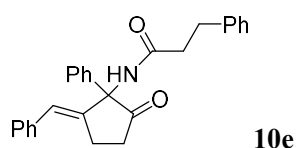

Purified by column chromatography (silica gel, EtOAc/Petroleum ether: 1/5) to afford the title compound (77% yield, 61 mg) as a colorless oil.  $^1\text{H}$  NMR (400 MHz,  $\text{CDCl}_3$ )  $\delta$  7.54 – 7.50 (m, 2H), 7.42 – 7.32 (m, 7H), 7.31 – 7.23 (m, 2H), 7.26 – 7.16 (m, 4H), 6.44 (brs, 1H), 6.15 (brs, 1H), 3.38 – 3.24 (m, 1H), 3.07 – 2.92 (m, 2H), 2.91 – 2.79 (m, 1H), 2.79 – 2.65 (m, 1H), 2.65 – 2.52 (m, 2H), 2.52 – 2.41 (m, 1H).  $^{13}\text{C}$  NMR (125 MHz,  $\text{CDCl}_3$ )  $\delta$  211.1, 170.7, 141.9, 140.7, 136.9, 136.8, 129.3, 129.1, 129.0, 128.8, 128.6, 128.5, 127.8, 127.2, 126.4, 125.9, 70.1, 37.4, 35.1, 31.5, 25.4. HRMS (ESI)  $m/z$ :  $[\text{M} + \text{H}]^+$  Calcd for  $\text{C}_{27}\text{H}_{26}\text{NO}_2$  396.1958; Found 396.1963.

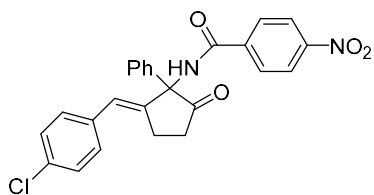

Purified by column chromatography (silica gel, EtOAc/Petroleum ether: 1/5) to afford the title compound (70% yield, 63 mg) as a yellow solid. mp: 215 °C. <sup>1</sup>H NMR (400 MHz, CDCl<sub>3</sub>) δ 8.30 (d, *J* = 8.8 Hz, 2H), 7.97 (d, *J* = 8.8 Hz, 2H), 7.65 (dd, *J* = 7.9, 1.8 Hz, 2H), 7.49 – 7.39 (m, 3H), 7.38 – 7.29 (m, 4H), 6.92 (s, 1H), 6.61 (s, 1H), 3.38 – 3.27 (m, 1H), 3.07 – 2.89 (m, 1H), 2.89 – 2.73 (m, 1H), 2.63 – 2.53 (m, 1H). <sup>13</sup>C NMR (100 MHz, CDCl<sub>3</sub>) δ 210.1, 164.0, 150.1, 141.8, 138.7, 136.1, 135.0, 133.3, 130.3, 129.7, 129.6, 128.8, 128.6, 127.8, 125.1, 124.1, 70.8, 35.0, 25.4. HRMS (ESI) *m/z*: [M + H]<sup>+</sup> Calcd for C<sub>25</sub>H<sub>20</sub>ClN<sub>2</sub>O<sub>4</sub> 447.1106; Found 447.1103.

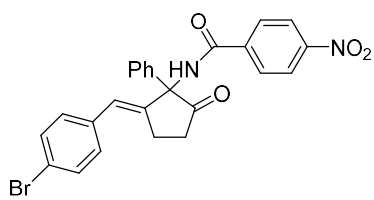

Purified by column chromatography (silica gel, EtOAc/Petroleum ether: 1/5) to afford the title compound (71% yield, 70 mg) as a yellow solid. mp: 211 °C. <sup>1</sup>H NMR (400 MHz, CDCl<sub>3</sub>) δ 8.27 (d, *J* = 8.8 Hz, 2H), 7.96 (d, *J* = 8.8 Hz, 2H), 7.70 – 7.58 (m, 2H), 7.50 (d, *J* = 8.5 Hz, 2H), 7.46 – 7.38 (m, 3H), 7.32 – 7.22 (m, 2H), 7.00 (s, 1H), 6.59 (s, 1H), 3.39 – 3.24 (m, 1H), 2.99 – 2.84 (m, 1H), 2.84 – 2.67 (m, 1H), 2.63 – 2.47 (m, 1H). <sup>13</sup>C NMR (100 MHz, CDCl<sub>3</sub>) δ 210.1, 164.0, 150.0, 142.0, 138.7, 136.1, 135.3, 131.7, 130.6, 129.6, 129.5, 128.6, 127.8, 125.1, 124.0, 121.4, 70.8, 35.0, 25.4. HRMS (ESI) *m/z*: [M + H]<sup>+</sup> Calcd for C<sub>25</sub>H<sub>20</sub>BrN<sub>2</sub>O<sub>4</sub> 491.0601; Found Found 491.0600.

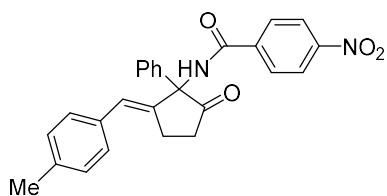

Purified by column chromatography (silica gel, EtOAc/Petroleum ether: 1/5) to afford the title compound (82% yield, 70 mg) as a yellow solid. mp: 185 °C. <sup>1</sup>H NMR (400 MHz, CDCl<sub>3</sub>) δ 8.24 (d, *J* = 8.8 Hz, 2H), 7.95 (d, *J* = 8.7 Hz, 2H), 7.65 (dd, *J* = 8.1, 1.7 Hz, 2H), 7.42 – 7.34 (m, 3H), 7.29 (d, *J* = 8.2 Hz, 2H), 7.18 (d, *J* = 8.1 Hz, 2H), 7.10 (brs, 1H), 6.61 (brs, 1H), 3.39 – 3.28 (m, 1H), 2.98 – 2.87 (m, 1H), 2.79 – 2.70 (m, 1H), 2.55 – 2.44 (m, 1H), 2.36 (s, 3H). <sup>13</sup>C NMR (100 MHz, CDCl<sub>3</sub>) δ 210.6, 163.9, 150.0, 140.0, 138.9, 137.4, 136.5, 133.7, 129.6, 129.4, 129.3, 129.0, 128.5, 127.9, 126.2, 124.1, 70.8, 35.1, 25.5, 21.4. HRMS (ESI) *m/z*: [M + H]<sup>+</sup> Calcd for C<sub>26</sub>H<sub>23</sub>N<sub>2</sub>O<sub>4</sub> 427.1652; Found 427.1654.

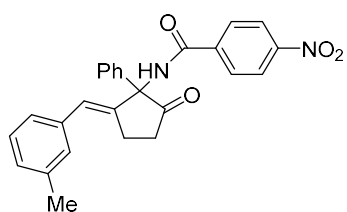

Purified by column chromatography (silica gel, EtOAc/Petroleum ether: 1/5) to afford the title compound (94% yield, 80 mg) as a yellow solid. mp: 197 °C. <sup>1</sup>H NMR (400 MHz, CDCl<sub>3</sub>) δ 8.23 (d, *J* = 8.6 Hz, 2H), 7.95 (dd, *J* = 8.8, 1.8 Hz, 2H), 7.66 (d, *J* = 8.1 Hz, 2H), 7.44 – 7.35 (m, 3H), 7.28 (d, *J* = 7.5 Hz, 1H), 7.20 (d, *J* = 12.2 Hz, 3H), 7.09 (d, *J* = 7.5 Hz, 1H), 6.62 (brs, 1H), 3.42 – 3.28 (m, 1H), 3.07 – 2.83 (m, 1H), 2.81 – 2.65 (m, 1H), 2.57 – 2.44 (m, 1H), 2.36 (s, 3H). <sup>13</sup>C NMR (100 MHz, CDCl<sub>3</sub>) δ 210.6, 164.0, 149.8, 140.9, 138.8, 138.7, 136.4, 136.3, 129.8, 129.4, 129.3, 128.5, 128.4, 128.2, 127.9, 126.3, 126.1, 123.9, 70.7, 35.0, 25.4, 21.6. HRMS (ESI) *m/z*: [M + H]<sup>+</sup> Calcd for C<sub>26</sub>H<sub>23</sub>N<sub>2</sub>O<sub>4</sub> 427.1652; Found 427.1649.

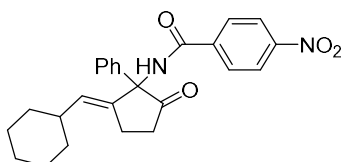

**10j**

Purified by column chromatography (silica gel, EtOAc/Petroleum ether: 1/5) to afford the title compound (71% yield, 59 mg) as a yellow solid. mp: 179 °C. <sup>1</sup>H NMR (400 MHz, CDCl<sub>3</sub>) δ 8.25 (d, *J* = 8.7 Hz, 2H), 7.90 (d, *J* = 8.7 Hz, 2H), 7.64 – 7.58 (m, 2H), 7.44 – 7.34 (m, 3H), 6.78 (brs, 1H), 5.49 (d, *J* = 9.2 Hz, 1H), 3.13 – 3.00 (m, 1H), 2.79 – 2.66 (m, 1H), 2.63 – 2.50 (m, 1H), 2.50 – 2.35 (m, 1H), 1.87 – 1.73 (m, 2H), 1.73 – 1.64 (m, 3H), 1.46 – 1.12 (m, 5H), 1.12 – 0.96 (m, 1H). <sup>13</sup>C NMR (100 MHz, CDCl<sub>3</sub>) δ 211.4, 163.8, 149.8, 139.3, 136.4, 132.9, 129.4, 129.2, 128.4, 127.9, 124.0, 69.6, 37.4, 34.9, 33.1, 33.0, 26.1, 26.1, 25.8, 23.0. HRMS (ESI) *m/z*: [M + H]<sup>+</sup> Calcd for C<sub>25</sub>H<sub>27</sub>N<sub>2</sub>O<sub>4</sub> 419.1965; Found 419.1970.

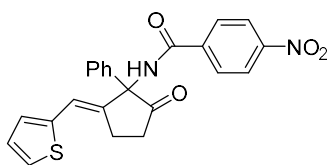

**10k**

Purified by column chromatography (silica gel, EtOAc/Petroleum ether: 1/5) to afford the title compound (60% yield, 50 mg) as a yellow solid. mp: 152 °C. <sup>1</sup>H NMR (500 MHz, CDCl<sub>3</sub>) δ 8.28 (d, *J* = 8.7 Hz, 2H), 7.96 (d, *J* = 8.8 Hz, 2H), 7.61 (dd, *J* = 8.0, 1.8 Hz, 2H), 7.44 – 7.39 (m, 3H), 7.37 (d, *J* = 5.0 Hz, 1H), 7.10 – 7.03 (m, 2H), 7.00 (brs, 1H), 6.85 (brs, 1H), 3.47 – 3.38 (m, 1H), 3.00 – 2.90 (m, 1H), 2.89 – 2.79 (m, 1H), 2.65 – 2.53 (m, 1H). <sup>13</sup>C NMR (125 MHz, CDCl<sub>3</sub>) δ 210.3, 164.0, 150.0, 140.1, 139.4, 138.7, 136.6, 129.6, 129.5, 128.6, 127.9, 127.7, 127.3, 126.3, 124.0, 119.9, 70.7, 34.7, 25.7. HRMS (ESI) *m/z*: [M + H]<sup>+</sup> Calcd for C<sub>23</sub>H<sub>19</sub>N<sub>2</sub>O<sub>4</sub>S 419.1060; Found 419.1056.

## V. Scale-up Experimental Procedures and Synthetic Transformations

### 1) Scale-up Experimental Procedures

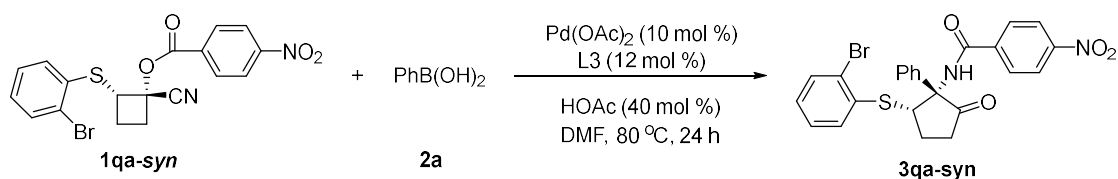

Compound **1q-syn** (1 mmol), **2a** (2.0 equiv.), Pd(OAc)<sub>2</sub> (10 mol %), 5,5'-dimethyl-2'-bipyridine (L3, 12 mol %), BQ (10 mol %), 4Å M.S (400 mg) and DMF (0.4 M) were placed in a sealed tube under nitrogen atmosphere. The mixture was stirred at 80 °C for 24 h. Upon completion, the mixture was cooled to room temperature, the reaction mixture was treated with saturated NaHCO<sub>3</sub> and then extracted with DCM for three times. The combined organic layers were washed by brine and dried over Na<sub>2</sub>SO<sub>4</sub>, then concentrated under reduced pressure. The residue was purified by column chromatography (silica gel, EtOAc/Petroleum ether (60-90 °C): 1/5) to give the desired compounds **3qa-syn** (419 mg, 82%).

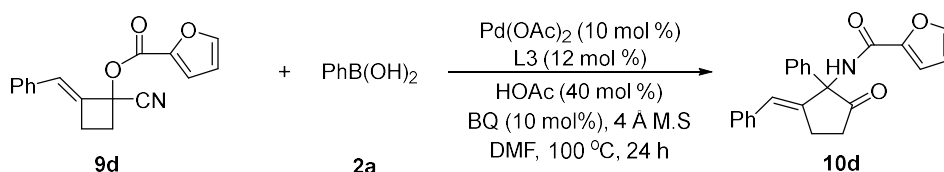

Compound **9d** (1 mmol), **2a** (2.0 equiv.), Pd(OAc)<sub>2</sub> (10 mol %), 5,5'-dimethyl-2'-bipyridine (L3, 12 mol %), BQ (10 mol %), 4Å M.S (400 mg) and DMF (0.4 M) were placed in a sealed tube under nitrogen atmosphere. The mixture was stirred at 80 °C for 24 h. Upon completion, the mixture was cooled to room temperature, the reaction mixture was treated with saturated NaHCO<sub>3</sub> and then extracted with DCM for three times. The combined organic layers were washed by brine and dried over Na<sub>2</sub>SO<sub>4</sub>, then concentrated under reduced pressure. The residue was purified by column chromatography (silica gel, EtOAc/Petroleum ether (60-90 °C): 1/3) to give the desired compounds **10d** (272 mg, 76%).

### 2) Synthetic Transformations

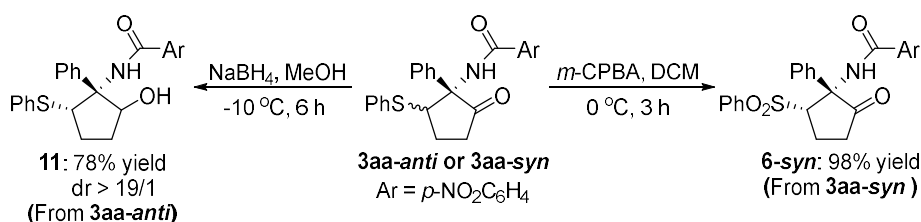

To a dried tube was added **3aa-anti** (0.1 mmol) and MeOH (0.5 M), then NaBH<sub>4</sub> (4 equiv.) was added at -10 °C.<sup>8</sup> The reaction mixture was stirred for 12 h in -10 °C. Upon completion, the mixture was concentrated under reduced pressure, and water was added. The aqueous layer was extracted with DCM. The combined organic layers were dried over anhydrous Na<sub>2</sub>SO<sub>4</sub> and the solvent was evaporated under reduced pressure. Purified by column chromatography (silica gel, EtOAc/Petroleum ether: 1/5) to afford the title compound **11** (78% yield, 34 mg) as a yellow solid. mp: 165 °C. <sup>1</sup>H NMR (400 MHz, CDCl<sub>3</sub>) 8.22 (d, *J* = 8.7 Hz, 2H), 7.60 (d, *J* = 8.8 Hz, 2H), 7.53 – 7.47 (m, 2H), 7.47 – 7.33 (m, 8H), 7.13 (s, 1H), 5.19 (d, *J* = 1.3 Hz, 1H), 4.73 – 4.63 (m, 1H), 3.92 – 3.77 (m, 1H), 2.59 – 2.48 (m, 1H), 2.37 – 2.30 (m, 1H), 2.15 – 2.02 (m, 2H). <sup>13</sup>C NMR (100 MHz, CDCl<sub>3</sub>) δ 166.3, 150.0, 138.9, 135.2, 135.0, 132.4,



130.0, 128.6, 128.3, 128.2, 128.1, 128.0, 124.0, 79.8, 73.5, 58.1, 30.3, 29.3. HRMS (ESI)  $m/z$ : HRMS (ESI)  $m/z$ :  $[M + H]^+$  Calcd for  $C_{24}H_{23}N_2O_4$  435.1373; Found 435.1371.

To the solution of **3aa-syn** (0.1 mmol) in DCM (0.1 M) was added a solution of *m*-CPBA (2.3 equiv.) in DCM (0.1 M) dropwise at 0 °C and stirred for 3 h.<sup>9</sup> Then, the solution was diluted with a saturated solution of  $Na_2SO_3$  (aq.) and extracted with DCM. The organic phase was washed with a saturated solution of  $NaHCO_3$  (aq.) and brine, then dried over  $Na_2SO_4$  and the solvent was evaporated under reduced pressure. The crude product was purified by chromatography on a silica gel column (EtOAc/petroleum ether = 1/1) to afford the title compound **6-syn** (98% yield, 46 mg) as a white solid.

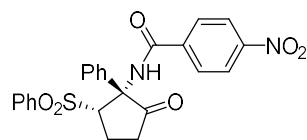

**6-syn**

Purified by column chromatography (silica gel, EtOAc/Petroleum ether: 1/5) to afford the title compound (99% yield, 46 mg) as a white solid. mp: 249 °C. <sup>1</sup>H NMR (400 MHz,  $CDCl_3$ )  $\delta$  8.20 (d,  $J$  = 8.8 Hz, 2H), 7.88 (d,  $J$  = 7.3 Hz, 2H), 7.77 (d,  $J$  = 8.8 Hz, 2H), 7.60 – 7.48 (m, 4H), 7.43 (t,  $J$  = 7.7 Hz, 2H), 7.37 (t,  $J$  = 7.3 Hz, 2H), 7.33 (d,  $J$  = 7.0 Hz, 1H), 5.09 – 4.99 (m, 1H), 2.87 – 2.66 (m, 2H), 2.50 – 2.26 (m, 2H). <sup>13</sup>C NMR (125 MHz,  $CDCl_3$ )  $\delta$  207.6, 164.8, 149.9, 138.9, 138.6, 134.5, 134.0, 129.4, 129.2, 129.1, 128.6, 128.5, 126.9, 123.7, 67.6, 64.3, 31.8, 20.6. HRMS (ESI)  $m/z$ :  $[M + H]^+$  Calcd for  $C_{24}H_{21}N_2O_6S$  465.1115; Found 465.1119.

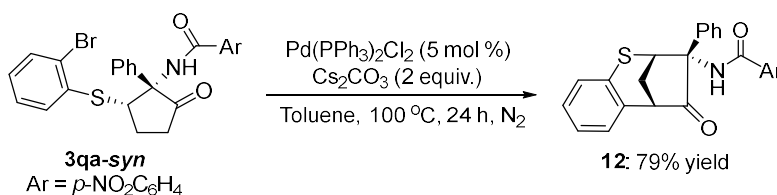

Compound **3qa-syn** (0.1 mmol),  $Pd(PPh_3)_2Cl_2$  (5 mol %),  $Cs_2CO_3$  (2 equiv.) and toluene (0.05 M) were placed in a sealed tube under nitrogen atmosphere.<sup>10</sup> The mixture was stirred at 100 °C for 24 h. Upon completion, the mixture was diluted with EtOAc and extracted with water. The organic layer was washed with brine, dried with  $Na_2SO_4$  and the solvent was evaporated under reduced pressure. The crude product was purified by chromatography on a silica gel column (EtOAc/petroleum ether = 1/5) to afford the title compound **12** (79% yield, 34 mg) as red solid. mp: 176 °C. <sup>1</sup>H NMR (500 MHz,  $CDCl_3$ )  $\delta$  8.20 (d,  $J$  = 8.7 Hz, 2H), 7.85 (d,  $J$  = 8.9 Hz, 2H), 7.66 (d,  $J$  = 7.5 Hz, 2H), 7.41 (t,  $J$  = 7.5 Hz, 2H), 7.35 (t,  $J$  = 7.2 Hz, 1H), 7.26 (d,  $J$  = 6.7 Hz, 2H), 7.19 – 7.11 (m, 1H), 7.06 (d,  $J$  = 7.4 Hz, 2H), 5.27 – 5.23 (m, 1H), 3.70 (dd,  $J$  = 6.0, 2.4 Hz, 1H), 2.78 – 2.63 (m, 1H), 2.31 (d,  $J$  = 13.2 Hz, 1H). <sup>13</sup>C NMR (100 MHz,  $CDCl_3$ )  $\delta$  209.0, 164.9, 149.8, 139.7, 136.4, 134.4, 132.0, 129.4, 129.2, 129.0, 128.6, 128.5, 127.3, 126.0, 124.8, 123.9, 75.6, 48.9, 46.1, 28.2. HRMS (ESI)  $m/z$ :  $[M + H]^+$  Calcd for  $C_{24}H_{19}N_2O_4S$  431.1060; Found 431.1049.

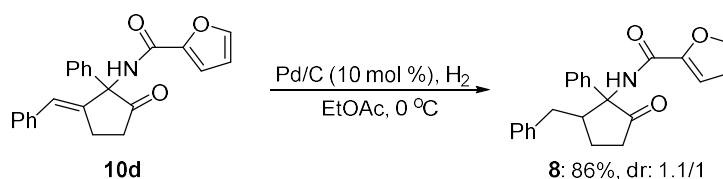

$Pd/C$  (10 mol%) was placed in a sealed bottle, then the solution of substrate **7da** (0.1 mmol) in methanol (0.2 M) was added. The mixture was stirred at room temperature under  $H_2$  atmosphere for 24 h. Upon completion, the mixture was filtered and concentrated under reduced pressure. The residue was purified by column chromatography (silica

gel, EtOAc/Petroleum ether (60-90 °C): 1/5) to give product **8h** (31 mg, 86%, *anti/syn* = 1.1/1). The NMR data were identical to **8h**.

## V. References

1. Vaquer, A. F.; Frongia, A.; Secci, F.; Tuveri, E. D. *RSC Advances* **2015**, *5*, 96695-96704.
2. Martis, A.; Luridiana, A.; Frongia, A.; Arca, M.; Sarais, G.; Aitken, D. J.; Guillot, R.; Secci, F. *Org. Biomol. Chem.* **2017**, *15*, 10053-10063.
3. Ai, W.; Liu, Y.; Wang, Q.; Lu, Z.; Liu, Q. *Org. Lett.* **2018**, *20*, 409-412.
4. Nájera, C.; Baeza, A.; Retamosa, M.; Sansano, J. *Synthesis* **2005**, 2787-2797.
5. Hirokane, T.; Hirata, Y.; Ishimoto, T.; Nishii, K.; Yamada, H. *Nat. Commun.* **2014**, *5*, 3478.
6. Yosef, H.; Elmasry, A.; Ismael, E. H.; Mahran, M. J. E. J. C. *Egypt. J. Chem.* **2010**, *53*, 745.
7. Yu, L.; Wu, Y.; Cao, H.; Zhang, X.; Shi, X.; Luan, J.; Chen, T.; Pan, Y.; Xu, Q. *Green Chem.* **2014**, *16*, 287-293.
8. Dai, L.; Li, X.-Q.; Zeng, Z.; Dong, S.-X.; Zhou, Y.-Q.; Liu, X.-H.; Feng, X.-M. *Org. Lett.* **2020**, *22*, 5041–5045.
9. Zhang, H.-Q.; Xi, J.-M.; Liao, W.-W. *J. Org. Chem.* **2020**, *85*, 1168-1180.
10. Butani, H. H.; Vachhani, D. D.; Bhoya, U. C.; Shah, A. K.; Van der Eycken, E. V. *Eur. J. Org. Chem.* **2014**, *30*, 6634-6638.

## VI. Crystal Data and Structure Refinements

### 1. Compound **1a-anti**:

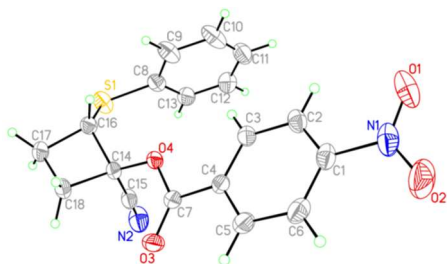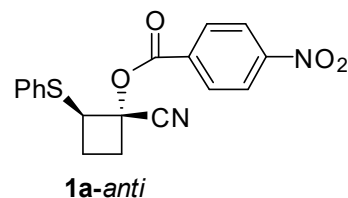

CCDC number: 2207694

Table 1. Crystal data and structure refinement for **1a-anti**.

|                                   |                                                                 |                  |
|-----------------------------------|-----------------------------------------------------------------|------------------|
| Identification code               | <b>1a-anti</b>                                                  |                  |
| Empirical formula                 | C <sub>18</sub> H <sub>14</sub> N <sub>2</sub> O <sub>4</sub> S |                  |
| Formula weight                    | 354.37                                                          |                  |
| Temperature                       | 147(2) K                                                        |                  |
| Wavelength                        | 0.71073 Å                                                       |                  |
| Crystal system                    | Monoclinic                                                      |                  |
| Space group                       | P2 <sub>1</sub> /c                                              |                  |
| Unit cell dimensions              | a = 9.2811(6) Å                                                 | α = 90°.         |
|                                   | b = 17.0181(11) Å                                               | β = 112.312(2)°. |
|                                   | c = 12.0473(6) Å                                                | γ = 90°.         |
| Volume                            | 1760.37(18) Å <sup>3</sup>                                      |                  |
| Z                                 | 4                                                               |                  |
| Density (calculated)              | 1.337 Mg/m <sup>3</sup>                                         |                  |
| Absorption coefficient            | 0.208 mm <sup>-1</sup>                                          |                  |
| F(000)                            | 736                                                             |                  |
| Crystal size                      | 0.200 x 0.180 x 0.170 mm <sup>3</sup>                           |                  |
| Theta range for data collection   | 2.666 to 27.488°.                                               |                  |
| Index ranges                      | -12 ≤ h ≤ 12, -22 ≤ k ≤ 22, -13 ≤ l ≤ 15                        |                  |
| Reflections collected             | 48870                                                           |                  |
| Independent reflections           | 4021 [R(int) = 0.0517]                                          |                  |
| Completeness to theta = 25.242°   | 99.9 %                                                          |                  |
| Absorption correction             | Semi-empirical from equivalents                                 |                  |
| Max. and min. transmission        | 0.9654 and 0.9595                                               |                  |
| Refinement method                 | Full-matrix least-squares on F <sup>2</sup>                     |                  |
| Data / restraints / parameters    | 4021 / 0 / 203                                                  |                  |
| Goodness-of-fit on F <sup>2</sup> | 1.041                                                           |                  |
| Final R indices [I > 2σ(I)]       | R1 = 0.0564, wR2 = 0.1460                                       |                  |

|                             |                                    |
|-----------------------------|------------------------------------|
| R indices (all data)        | R1 = 0.0985, wR2 = 0.1855          |
| Extinction coefficient      | 0.016(2)                           |
| Largest diff. peak and hole | 0.506 and -0.417 e.Å <sup>-3</sup> |

Table 2. Atomic coordinates (x 10<sup>4</sup>) and equivalent isotropic displacement parameters (Å<sup>2</sup>x 10<sup>3</sup>) for Y. U(eq) is defined as one third of the trace of the orthogonalized U<sup>ij</sup> tensor.

|       | x        | y       | z        | U(eq)  |
|-------|----------|---------|----------|--------|
| C(1)  | 301(2)   | 4870(1) | -1614(1) | 67(1)  |
| C(2)  | 156(2)   | 4223(1) | -959(1)  | 65(1)  |
| C(3)  | 1366(2)  | 4023(1) | 107(1)   | 58(1)  |
| C(4)  | 2720(2)  | 4471(1) | 520(1)   | 55(1)  |
| C(5)  | 2864(2)  | 5118(1) | -135(2)  | 68(1)  |
| C(6)  | 1655(2)  | 5317(1) | -1202(2) | 74(1)  |
| C(7)  | 4054(3)  | 4274(2) | 1620(2)  | 57(1)  |
| C(8)  | 2544(2)  | 1906(1) | 2963(2)  | 73(1)  |
| C(9)  | 1140(3)  | 2313(1) | 2551(2)  | 95(1)  |
| C(10) | 11(2)    | 2139(2) | 1431(2)  | 115(2) |
| C(11) | 287(3)   | 1560(2) | 723(2)   | 113(2) |
| C(12) | 1691(3)  | 1153(2) | 1135(2)  | 115(1) |
| C(13) | 2820(2)  | 1327(1) | 2255(2)  | 90(1)  |
| C(14) | 4888(3)  | 3494(2) | 3386(2)  | 53(1)  |
| C(15) | 6023(3)  | 2999(2) | 3142(3)  | 72(1)  |
| C(16) | 4218(3)  | 3138(2) | 4254(2)  | 62(1)  |
| C(17) | 5497(4)  | 3562(2) | 5289(2)  | 71(1)  |
| C(18) | 5672(3)  | 4124(2) | 4353(2)  | 63(1)  |
| N(1)  | -966(4)  | 5083(2) | -2707(2) | 87(1)  |
| N(2)  | 6936(4)  | 2618(3) | 2993(3)  | 119(1) |
| O(1)  | -2188(3) | 4732(2) | -2977(2) | 113(1) |
| O(2)  | -758(4)  | 5626(2) | -3286(3) | 134(1) |
| O(3)  | 5328(2)  | 4555(2) | 1919(2)  | 84(1)  |
| O(4)  | 3680(2)  | 3725(1) | 2276(1)  | 56(1)  |
| S(1)  | 4036(1)  | 2104(1) | 4378(1)  | 91(1)  |

Table 3. Bond lengths [Å] and angles [°] for Y.

|             |            |
|-------------|------------|
| C(1)-C(2)   | 1.3900     |
| C(1)-C(6)   | 1.3900     |
| C(1)-N(1)   | 1.440(3)   |
| C(2)-C(3)   | 1.3900     |
| C(3)-C(4)   | 1.3900     |
| C(4)-C(5)   | 1.3900     |
| C(4)-C(7)   | 1.468(3)   |
| C(5)-C(6)   | 1.3900     |
| C(7)-O(3)   | 1.197(3)   |
| C(7)-O(4)   | 1.351(3)   |
| C(8)-C(9)   | 1.3900     |
| C(8)-C(13)  | 1.3900     |
| C(8)-S(1)   | 1.7733(19) |
| C(9)-C(10)  | 1.3900     |
| C(10)-C(11) | 1.3900     |
| C(11)-C(12) | 1.3900     |
| C(12)-C(13) | 1.3900     |
| C(14)-O(4)  | 1.435(3)   |
| C(14)-C(15) | 1.463(4)   |
| C(14)-C(16) | 1.531(4)   |
| C(14)-C(18) | 1.547(3)   |
| C(15)-N(2)  | 1.135(4)   |
| C(16)-C(17) | 1.536(4)   |
| C(16)-S(1)  | 1.780(3)   |
| C(17)-C(18) | 1.534(4)   |
| N(1)-O(1)   | 1.212(4)   |
| N(1)-O(2)   | 1.216(4)   |

|                |            |
|----------------|------------|
| C(2)-C(1)-C(6) | 120.0      |
| C(2)-C(1)-N(1) | 119.8(2)   |
| C(6)-C(1)-N(1) | 120.2(2)   |
| C(3)-C(2)-C(1) | 120.0      |
| C(2)-C(3)-C(4) | 120.0      |
| C(5)-C(4)-C(3) | 120.0      |
| C(5)-C(4)-C(7) | 117.59(14) |
| C(3)-C(4)-C(7) | 122.39(15) |
| C(4)-C(5)-C(6) | 120.0      |
| C(5)-C(6)-C(1) | 120.0      |

|                   |            |
|-------------------|------------|
| O(3)-C(7)-O(4)    | 122.9(2)   |
| O(3)-C(7)-C(4)    | 125.3(2)   |
| O(4)-C(7)-C(4)    | 111.73(19) |
| C(9)-C(8)-C(13)   | 120.0      |
| C(9)-C(8)-S(1)    | 122.21(15) |
| C(13)-C(8)-S(1)   | 117.79(15) |
| C(10)-C(9)-C(8)   | 120.0      |
| C(9)-C(10)-C(11)  | 120.0      |
| C(12)-C(11)-C(10) | 120.0      |
| C(11)-C(12)-C(13) | 120.0      |
| C(12)-C(13)-C(8)  | 120.0      |
| O(4)-C(14)-C(15)  | 109.8(2)   |
| O(4)-C(14)-C(16)  | 111.63(19) |
| C(15)-C(14)-C(16) | 114.8(2)   |
| O(4)-C(14)-C(18)  | 119.3(2)   |
| C(15)-C(14)-C(18) | 112.4(2)   |
| C(16)-C(14)-C(18) | 87.51(19)  |
| N(2)-C(15)-C(14)  | 177.7(3)   |
| C(14)-C(16)-C(17) | 88.8(2)    |
| C(14)-C(16)-S(1)  | 121.7(2)   |
| C(17)-C(16)-S(1)  | 117.7(2)   |
| C(18)-C(17)-C(16) | 87.81(19)  |
| C(17)-C(18)-C(14) | 88.3(2)    |
| O(1)-N(1)-O(2)    | 123.8(3)   |
| O(1)-N(1)-C(1)    | 118.5(3)   |
| O(2)-N(1)-C(1)    | 117.6(3)   |
| C(7)-O(4)-C(14)   | 116.80(18) |
| C(8)-S(1)-C(16)   | 99.86(12)  |

---

Symmetry transformations used to generate equivalent atoms:

Table 4. Anisotropic displacement parameters ( $\text{\AA}^2 \times 10^3$ ) for Y. The anisotropic displacement factor exponent takes the form:  $-2\pi^2 [ h^2 a^{*2} U^{11} + \dots + 2 h k a^* b^* U^{12} ]$

---

|      | $U^{11}$ | $U^{22}$ | $U^{33}$ | $U^{23}$ | $U^{13}$ | $U^{12}$ |
|------|----------|----------|----------|----------|----------|----------|
| C(1) | 69(2)    | 84(2)    | 46(1)    | -1(1)    | 19(1)    | 23(2)    |
| C(2) | 60(2)    | 74(2)    | 55(1)    | -13(1)   | 14(1)    | 9(1)     |

---

|       |        |        |        |        |        |        |
|-------|--------|--------|--------|--------|--------|--------|
| C(3)  | 58(1)  | 62(2)  | 52(1)  | -2(1)  | 18(1)  | 3(1)   |
| C(4)  | 53(1)  | 68(2)  | 45(1)  | 1(1)   | 21(1)  | 2(1)   |
| C(5)  | 62(2)  | 86(2)  | 59(2)  | 12(1)  | 26(1)  | 0(1)   |
| C(6)  | 78(2)  | 89(2)  | 61(2)  | 21(2)  | 34(2)  | 18(2)  |
| C(7)  | 54(1)  | 70(2)  | 48(1)  | 3(1)   | 19(1)  | -4(1)  |
| C(8)  | 73(2)  | 67(2)  | 73(2)  | 17(2)  | 19(2)  | -14(1) |
| C(9)  | 73(2)  | 78(2)  | 113(3) | 1(2)   | 10(2)  | -12(2) |
| C(10) | 69(2)  | 100(3) | 139(4) | 16(3)  | -1(2)  | -18(2) |
| C(11) | 90(3)  | 144(4) | 86(3)  | 8(3)   | 12(2)  | -34(3) |
| C(12) | 113(3) | 140(4) | 91(3)  | -20(3) | 39(2)  | -19(3) |
| C(13) | 83(2)  | 107(3) | 77(2)  | 10(2)  | 26(2)  | -5(2)  |
| C(14) | 51(1)  | 58(1)  | 44(1)  | -2(1)  | 11(1)  | -1(1)  |
| C(15) | 61(2)  | 88(2)  | 59(2)  | -14(2) | 12(1)  | 6(2)   |
| C(16) | 60(2)  | 67(2)  | 53(1)  | 7(1)   | 15(1)  | -4(1)  |
| C(17) | 75(2)  | 84(2)  | 49(1)  | -1(1)  | 16(1)  | -3(2)  |
| C(18) | 67(2)  | 65(2)  | 51(1)  | -7(1)  | 14(1)  | -7(1)  |
| N(1)  | 89(2)  | 106(2) | 54(1)  | 1(2)   | 14(1)  | 36(2)  |
| N(2)  | 90(2)  | 154(3) | 105(2) | -39(2) | 26(2)  | 35(2)  |
| O(1)  | 92(2)  | 119(2) | 85(2)  | -17(2) | -16(1) | 17(2)  |
| O(2)  | 122(2) | 178(3) | 87(2)  | 59(2)  | 23(2)  | 46(2)  |
| O(3)  | 56(1)  | 120(2) | 69(1)  | 22(1)  | 15(1)  | -21(1) |
| O(4)  | 52(1)  | 66(1)  | 44(1)  | 5(1)   | 11(1)  | -6(1)  |
| S(1)  | 96(1)  | 71(1)  | 79(1)  | 24(1)  | 2(1)   | -14(1) |

Table 5. Hydrogen coordinates ( $\times 10^4$ ) and isotropic displacement parameters ( $\text{\AA}^2 \times 10^{-3}$ ) for Y.

|       | x    | y    | z     | U(eq) |
|-------|------|------|-------|-------|
| H(2)  | -769 | 3917 | -1241 | 78    |
| H(3)  | 1268 | 3581 | 555   | 70    |
| H(5)  | 3790 | 5424 | 147   | 82    |
| H(6)  | 1753 | 5760 | -1649 | 89    |
| H(9)  | 952  | 2709 | 3035  | 114   |
| H(10) | -948 | 2417 | 1149  | 138   |
| H(11) | -485 | 1442 | -43   | 136   |

|        |      |      |      |     |
|--------|------|------|------|-----|
| H(12)  | 1879 | 757  | 651  | 138 |
| H(13)  | 3779 | 1049 | 2536 | 108 |
| H(16)  | 3192 | 3391 | 4118 | 74  |
| H(17A) | 5122 | 3817 | 5867 | 86  |
| H(17B) | 6430 | 3236 | 5707 | 86  |
| H(18A) | 6767 | 4237 | 4470 | 76  |
| H(18B) | 5063 | 4615 | 4248 | 76  |

## 2. Compound **3aa-anti**:

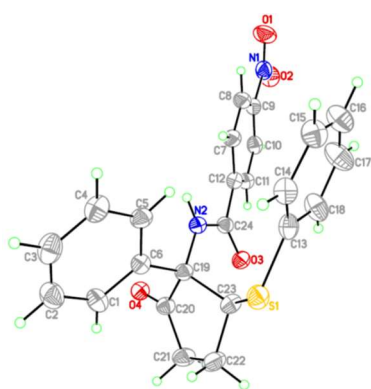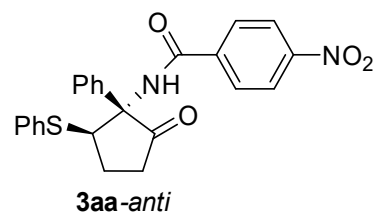

**CCDC number:** 2207692

Table 1. Crystal data and structure refinement for **3aa-anti**.

|                        |                                                                 |          |
|------------------------|-----------------------------------------------------------------|----------|
| Identification code    | <b>3aa-anti</b>                                                 |          |
| Empirical formula      | C <sub>24</sub> H <sub>20</sub> N <sub>2</sub> O <sub>4</sub> S |          |
| Formula weight         | 432.49                                                          |          |
| Temperature            | 293(2) K                                                        |          |
| Wavelength             | 0.71073 Å                                                       |          |
| Crystal system         | Tetragonal                                                      |          |
| Space group            | P-42 <sub>1</sub> c                                             |          |
| Unit cell dimensions   | a = 23.1883(6) Å                                                | α = 90°. |
|                        | b = 23.1883(6) Å                                                | β = 90°. |
|                        | c = 7.9822(3) Å                                                 | γ = 90°. |
| Volume                 | 4292.0(3) Å <sup>3</sup>                                        |          |
| Z                      | 8                                                               |          |
| Density (calculated)   | 1.339 Mg/m <sup>3</sup>                                         |          |
| Absorption coefficient | 0.184 mm <sup>-1</sup>                                          |          |
| F(000)                 | 1808                                                            |          |



|                                   |                                             |
|-----------------------------------|---------------------------------------------|
| Crystal size                      | 0.200 x 0.180 x 0.170 mm <sup>3</sup>       |
| Theta range for data collection   | 2.699 to 25.574°.                           |
| Index ranges                      | -28<=h<=28, -28<=k<=28, -9<=l<=9            |
| Reflections collected             | 60524                                       |
| Independent reflections           | 4029 [R(int) = 0.0647]                      |
| Completeness to theta = 25.242°   | 99.8 %                                      |
| Absorption correction             | Semi-empirical from equivalents             |
| Max. and min. transmission        | 0.9693 and 0.9640                           |
| Refinement method                 | Full-matrix least-squares on F <sup>2</sup> |
| Data / restraints / parameters    | 4029 / 0 / 282                              |
| Goodness-of-fit on F <sup>2</sup> | 1.098                                       |
| Final R indices [I>2sigma(I)]     | R1 = 0.0891, wR2 = 0.2481                   |
| R indices (all data)              | R1 = 0.1224, wR2 = 0.4116                   |
| Absolute structure parameter      | -0.3(5)                                     |
| Extinction coefficient            | 0.018(9)                                    |
| Largest diff. peak and hole       | 0.692 and -0.381 e.Å <sup>-3</sup>          |

Table 2. Atomic coordinates ( $\times 10^4$ ) and equivalent isotropic displacement parameters ( $\text{\AA}^2 \times 10^3$ ) for Y.  $U(\text{eq})$  is defined as one third of the trace of the orthogonalized  $U^{ij}$  tensor.

|      | x       | y       | z        | U(eq)  |
|------|---------|---------|----------|--------|
| S(1) | 6987(1) | 5005(1) | 6459(4)  | 89(1)  |
| O(1) | 5837(5) | 8022(6) | -936(15) | 145(4) |
| O(2) | 5627(5) | 8678(5) | 829(17)  | 138(4) |
| O(3) | 6699(3) | 6921(3) | 7123(9)  | 88(2)  |
| O(4) | 8027(3) | 6935(3) | 7714(9)  | 83(2)  |
| N(1) | 5839(4) | 8211(6) | 485(16)  | 107(3) |
| N(2) | 7281(3) | 6488(3) | 5221(10) | 71(2)  |
| C(1) | 8564(5) | 5686(4) | 6499(17) | 92(3)  |
| C(2) | 8997(6) | 5359(6) | 5783(19) | 109(4) |
| C(3) | 8933(6) | 5136(5) | 4220(20) | 110(4) |
| C(4) | 8444(5) | 5245(4) | 3357(17) | 94(3)  |
| C(5) | 8004(5) | 5574(4) | 4036(11) | 81(2)  |
| C(6) | 8054(4) | 5793(4) | 5652(12) | 72(2)  |
| C(7) | 6642(5) | 7052(5) | 2620(14) | 84(3)  |
| C(8) | 6392(5) | 7374(5) | 1383(15) | 89(3)  |
| C(9) | 6121(5) | 7880(5) | 1807(16) | 87(3)  |

|       |         |         |          |        |
|-------|---------|---------|----------|--------|
| C(10) | 6097(5) | 8070(5) | 3439(17) | 89(3)  |
| C(11) | 6347(5) | 7742(4) | 4685(15) | 81(2)  |
| C(12) | 6620(4) | 7234(5) | 4293(13) | 76(2)  |
| C(13) | 6580(4) | 5120(4) | 4592(17) | 85(3)  |
| C(14) | 6695(5) | 4754(5) | 3276(16) | 86(3)  |
| C(15) | 6369(5) | 4777(5) | 1830(20) | 101(4) |
| C(16) | 5949(6) | 5180(6) | 1670(20) | 115(4) |
| C(17) | 5838(7) | 5546(7) | 2970(30) | 135(6) |
| C(18) | 6139(5) | 5517(6) | 4450(20) | 111(4) |
| C(19) | 7555(4) | 6119(4) | 6452(10) | 67(2)  |
| C(20) | 7773(4) | 6485(4) | 7937(12) | 77(2)  |
| C(21) | 7658(7) | 6196(5) | 9558(14) | 100(3) |
| C(22) | 7399(7) | 5610(6) | 9078(16) | 105(4) |
| C(23) | 7128(5) | 5709(4) | 7352(13) | 82(2)  |
| C(24) | 6873(4) | 6877(4) | 5667(11) | 71(2)  |

Table 3. Bond lengths [ $\text{\AA}$ ] and angles [ $^\circ$ ] for Y.

|            |           |
|------------|-----------|
| S(1)-C(13) | 1.784(13) |
| S(1)-C(23) | 1.811(11) |
| O(1)-N(1)  | 1.216(17) |
| O(2)-N(1)  | 1.221(17) |
| O(3)-C(24) | 1.235(11) |
| O(4)-C(20) | 1.211(12) |
| N(1)-C(9)  | 1.459(17) |
| N(2)-C(24) | 1.354(12) |
| N(2)-C(19) | 1.450(12) |
| N(2)-H(2N) | 0.8600    |
| C(1)-C(2)  | 1.382(17) |
| C(1)-C(6)  | 1.385(15) |
| C(1)-H(1)  | 0.9300    |
| C(2)-C(3)  | 1.36(2)   |
| C(2)-H(2)  | 0.9300    |
| C(3)-C(4)  | 1.35(2)   |
| C(3)-H(3)  | 0.9300    |
| C(4)-C(5)  | 1.386(15) |
| C(4)-H(4)  | 0.9300    |

|                  |           |
|------------------|-----------|
| C(5)-C(6)        | 1.391(13) |
| C(5)-H(5)        | 0.9300    |
| C(6)-C(19)       | 1.522(13) |
| C(7)-C(8)        | 1.368(16) |
| C(7)-C(12)       | 1.401(15) |
| C(7)-H(7)        | 0.9300    |
| C(8)-C(9)        | 1.374(17) |
| C(8)-H(8)        | 0.9300    |
| C(9)-C(10)       | 1.376(19) |
| C(10)-C(11)      | 1.380(16) |
| C(10)-H(10)      | 0.9300    |
| C(11)-C(12)      | 1.373(14) |
| C(11)-H(11)      | 0.9300    |
| C(12)-C(24)      | 1.494(14) |
| C(13)-C(14)      | 1.377(16) |
| C(13)-C(18)      | 1.381(16) |
| C(14)-C(15)      | 1.383(19) |
| C(14)-H(14)      | 0.9300    |
| C(15)-C(16)      | 1.356(19) |
| C(15)-H(15)      | 0.9300    |
| C(16)-C(17)      | 1.36(2)   |
| C(16)-H(16)      | 0.9300    |
| C(17)-C(18)      | 1.37(2)   |
| C(17)-H(17)      | 0.9300    |
| C(18)-H(18)      | 0.9300    |
| C(19)-C(20)      | 1.543(13) |
| C(19)-C(23)      | 1.550(13) |
| C(20)-C(21)      | 1.481(15) |
| C(21)-C(22)      | 1.534(17) |
| C(21)-H(21A)     | 0.9700    |
| C(21)-H(21B)     | 0.9700    |
| C(22)-C(23)      | 1.532(18) |
| C(22)-H(22A)     | 0.9700    |
| C(22)-H(22B)     | 0.9700    |
| C(23)-H(23)      | 0.9800    |
| C(13)-S(1)-C(23) | 106.8(5)  |
| O(1)-N(1)-O(2)   | 121.8(12) |

|                   |           |
|-------------------|-----------|
| O(1)-N(1)-C(9)    | 119.2(13) |
| O(2)-N(1)-C(9)    | 118.9(14) |
| C(24)-N(2)-C(19)  | 121.4(8)  |
| C(24)-N(2)-H(2N)  | 119.3     |
| C(19)-N(2)-H(2N)  | 119.3     |
| C(2)-C(1)-C(6)    | 121.1(12) |
| C(2)-C(1)-H(1)    | 119.4     |
| C(6)-C(1)-H(1)    | 119.4     |
| C(3)-C(2)-C(1)    | 120.7(14) |
| C(3)-C(2)-H(2)    | 119.7     |
| C(1)-C(2)-H(2)    | 119.7     |
| C(4)-C(3)-C(2)    | 119.1(12) |
| C(4)-C(3)-H(3)    | 120.4     |
| C(2)-C(3)-H(3)    | 120.4     |
| C(3)-C(4)-C(5)    | 121.6(12) |
| C(3)-C(4)-H(4)    | 119.2     |
| C(5)-C(4)-H(4)    | 119.2     |
| C(4)-C(5)-C(6)    | 120.2(12) |
| C(4)-C(5)-H(5)    | 119.9     |
| C(6)-C(5)-H(5)    | 119.9     |
| C(1)-C(6)-C(5)    | 117.3(10) |
| C(1)-C(6)-C(19)   | 122.2(9)  |
| C(5)-C(6)-C(19)   | 120.5(9)  |
| C(8)-C(7)-C(12)   | 120.5(10) |
| C(8)-C(7)-H(7)    | 119.7     |
| C(12)-C(7)-H(7)   | 119.7     |
| C(7)-C(8)-C(9)    | 118.9(11) |
| C(7)-C(8)-H(8)    | 120.6     |
| C(9)-C(8)-H(8)    | 120.6     |
| C(8)-C(9)-C(10)   | 121.6(11) |
| C(8)-C(9)-N(1)    | 118.4(12) |
| C(10)-C(9)-N(1)   | 120.0(12) |
| C(9)-C(10)-C(11)  | 119.3(11) |
| C(9)-C(10)-H(10)  | 120.3     |
| C(11)-C(10)-H(10) | 120.3     |
| C(12)-C(11)-C(10) | 120.1(11) |
| C(12)-C(11)-H(11) | 119.9     |
| C(10)-C(11)-H(11) | 119.9     |

|                     |           |
|---------------------|-----------|
| C(11)-C(12)-C(7)    | 119.5(10) |
| C(11)-C(12)-C(24)   | 119.3(9)  |
| C(7)-C(12)-C(24)    | 121.2(9)  |
| C(14)-C(13)-C(18)   | 119.5(12) |
| C(14)-C(13)-S(1)    | 116.3(8)  |
| C(18)-C(13)-S(1)    | 124.0(10) |
| C(13)-C(14)-C(15)   | 120.6(10) |
| C(13)-C(14)-H(14)   | 119.7     |
| C(15)-C(14)-H(14)   | 119.7     |
| C(16)-C(15)-C(14)   | 119.6(12) |
| C(16)-C(15)-H(15)   | 120.2     |
| C(14)-C(15)-H(15)   | 120.2     |
| C(15)-C(16)-C(17)   | 119.8(14) |
| C(15)-C(16)-H(16)   | 120.1     |
| C(17)-C(16)-H(16)   | 120.1     |
| C(16)-C(17)-C(18)   | 121.9(13) |
| C(16)-C(17)-H(17)   | 119.1     |
| C(18)-C(17)-H(17)   | 119.1     |
| C(17)-C(18)-C(13)   | 118.5(14) |
| C(17)-C(18)-H(18)   | 120.7     |
| C(13)-C(18)-H(18)   | 120.7     |
| N(2)-C(19)-C(6)     | 110.0(7)  |
| N(2)-C(19)-C(20)    | 109.9(7)  |
| C(6)-C(19)-C(20)    | 110.2(7)  |
| N(2)-C(19)-C(23)    | 113.4(7)  |
| C(6)-C(19)-C(23)    | 112.0(7)  |
| C(20)-C(19)-C(23)   | 101.0(7)  |
| O(4)-C(20)-C(21)    | 127.3(9)  |
| O(4)-C(20)-C(19)    | 121.3(8)  |
| C(21)-C(20)-C(19)   | 111.3(8)  |
| C(20)-C(21)-C(22)   | 104.6(9)  |
| C(20)-C(21)-H(21A)  | 110.8     |
| C(22)-C(21)-H(21A)  | 110.8     |
| C(20)-C(21)-H(21B)  | 110.8     |
| C(22)-C(21)-H(21B)  | 110.8     |
| H(21A)-C(21)-H(21B) | 108.9     |
| C(23)-C(22)-C(21)   | 104.7(10) |
| C(23)-C(22)-H(22A)  | 110.8     |

|                     |          |
|---------------------|----------|
| C(21)-C(22)-H(22A)  | 110.8    |
| C(23)-C(22)-H(22B)  | 110.8    |
| C(21)-C(22)-H(22B)  | 110.8    |
| H(22A)-C(22)-H(22B) | 108.9    |
| C(22)-C(23)-C(19)   | 104.2(9) |
| C(22)-C(23)-S(1)    | 107.1(8) |
| C(19)-C(23)-S(1)    | 119.2(7) |
| C(22)-C(23)-H(23)   | 108.6    |
| C(19)-C(23)-H(23)   | 108.6    |
| S(1)-C(23)-H(23)    | 108.6    |
| O(3)-C(24)-N(2)     | 122.1(9) |
| O(3)-C(24)-C(12)    | 121.2(9) |
| N(2)-C(24)-C(12)    | 116.7(8) |

---

Symmetry transformations used to generate equivalent atoms:

Table 4. Anisotropic displacement parameters ( $\text{\AA}^2 \times 10^3$ ) for Y. The anisotropic displacement factor exponent takes the form:  $-2\pi^2 [ h^2 a^* U^{11} + \dots + 2 h k a^* b^* U^{12} ]$

|       | U <sup>11</sup> | U <sup>22</sup> | U <sup>33</sup> | U <sup>23</sup> | U <sup>13</sup> | U <sup>12</sup> |
|-------|-----------------|-----------------|-----------------|-----------------|-----------------|-----------------|
| S(1)  | 88(2)           | 70(1)           | 108(2)          | 11(1)           | -4(1)           | -12(1)          |
| O(1)  | 140(9)          | 193(12)         | 102(7)          | 18(8)           | -35(6)          | 33(9)           |
| O(2)  | 134(8)          | 114(7)          | 166(10)         | 39(7)           | -20(7)          | 25(6)           |
| O(3)  | 86(4)           | 104(5)          | 75(4)           | -5(4)           | 13(3)           | 5(4)            |
| O(4)  | 90(4)           | 79(4)           | 79(4)           | -10(3)          | 0(3)            | -7(3)           |
| N(1)  | 80(6)           | 124(9)          | 117(8)          | 29(7)           | -7(6)           | 1(6)            |
| N(2)  | 71(4)           | 78(4)           | 63(4)           | 2(3)            | 2(3)            | 1(3)            |
| C(1)  | 84(6)           | 87(6)           | 107(7)          | -4(6)           | -13(6)          | 8(5)            |
| C(2)  | 100(8)          | 107(8)          | 119(9)          | -7(7)           | -5(7)           | 26(7)           |
| C(3)  | 101(8)          | 87(7)           | 142(11)         | -6(7)           | 29(8)           | 12(6)           |
| C(4)  | 103(7)          | 77(5)           | 101(7)          | -22(5)          | 22(6)           | -1(5)           |
| C(5)  | 92(6)           | 85(6)           | 65(5)           | -7(4)           | 6(4)            | -7(5)           |
| C(6)  | 76(5)           | 66(4)           | 75(5)           | -4(4)           | 2(4)            | -4(4)           |
| C(7)  | 80(6)           | 96(7)           | 77(6)           | 0(5)            | 2(5)            | 8(5)            |
| C(8)  | 80(6)           | 111(8)          | 77(6)           | 8(6)            | -6(5)           | 11(5)           |
| C(9)  | 72(5)           | 99(7)           | 90(7)           | 7(5)            | -1(5)           | -9(5)           |
| C(10) | 80(6)           | 75(5)           | 111(8)          | 4(6)            | -5(5)           | -3(5)           |

|       |         |         |         |         |         |        |
|-------|---------|---------|---------|---------|---------|--------|
| C(11) | 86(6)   | 76(5)   | 81(6)   | -1(5)   | 0(5)    | -2(5)  |
| C(12) | 72(5)   | 81(5)   | 76(5)   | 2(4)    | 3(4)    | -2(4)  |
| C(13) | 73(5)   | 71(5)   | 111(7)  | -6(5)   | 5(5)    | -11(4) |
| C(14) | 82(6)   | 75(5)   | 102(7)  | -7(5)   | 4(5)    | 2(5)   |
| C(15) | 104(8)  | 87(6)   | 113(9)  | -15(6)  | -3(7)   | -1(6)  |
| C(16) | 111(9)  | 110(8)  | 125(9)  | -27(8)  | -28(8)  | 9(8)   |
| C(17) | 125(11) | 123(10) | 157(14) | -27(10) | -53(11) | 42(9)  |
| C(18) | 85(7)   | 108(8)  | 141(11) | -35(8)  | -15(8)  | 23(6)  |
| C(19) | 74(5)   | 68(4)   | 60(4)   | -2(4)   | 1(4)    | -4(4)  |
| C(20) | 87(6)   | 75(5)   | 69(5)   | -4(4)   | -2(4)   | -5(5)  |
| C(21) | 128(9)  | 107(8)  | 65(5)   | -4(5)   | -3(6)   | -10(7) |
| C(22) | 126(9)  | 108(8)  | 82(6)   | 22(6)   | 8(6)    | -22(7) |
| C(23) | 95(6)   | 75(5)   | 75(5)   | 6(4)    | 11(5)   | -7(4)  |
| C(24) | 69(4)   | 74(5)   | 70(5)   | -4(4)   | -1(4)   | 0(4)   |

Table 5. Hydrogen coordinates ( $\times 10^4$ ) and isotropic displacement parameters ( $\text{\AA}^2 \times 10^{-3}$ ) for Y.

|        | x    | y    | z     | U(eq) |
|--------|------|------|-------|-------|
| H(2N)  | 7380 | 6460 | 4186  | 85    |
| H(1)   | 8616 | 5837 | 7568  | 111   |
| H(2)   | 9335 | 5292 | 6377  | 130   |
| H(3)   | 9223 | 4911 | 3745  | 131   |
| H(4)   | 8401 | 5095 | 2283  | 113   |
| H(5)   | 7674 | 5649 | 3410  | 97    |
| H(7)   | 6828 | 6709 | 2349  | 101   |
| H(8)   | 6405 | 7253 | 273   | 107   |
| H(10)  | 5915 | 8415 | 3700  | 106   |
| H(11)  | 6331 | 7865 | 5793  | 97    |
| H(14)  | 6994 | 4488 | 3363  | 103   |
| H(15)  | 6438 | 4518 | 959   | 122   |
| H(16)  | 5737 | 5207 | 689   | 138   |
| H(17)  | 5551 | 5823 | 2847  | 162   |
| H(18)  | 6047 | 5760 | 5339  | 133   |
| H(21A) | 7387 | 6419 | 10224 | 120   |

|        |      |      |       |     |
|--------|------|------|-------|-----|
| H(21B) | 8011 | 6147 | 10191 | 120 |
| H(22A) | 7697 | 5317 | 9022  | 126 |
| H(22B) | 7110 | 5492 | 9885  | 126 |
| H(23)  | 6760 | 5910 | 7501  | 98  |

### 3. Compound 6-syn:

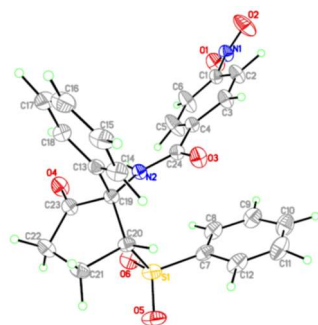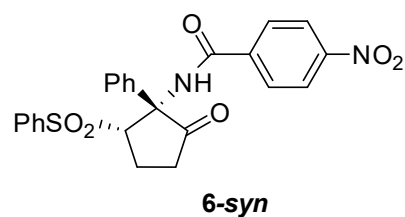

CCDC number: 2207693

Table 1. Crystal data and structure refinement for **6-syn**.

|                                 |                                                                 |                    |
|---------------------------------|-----------------------------------------------------------------|--------------------|
| Identification code             | <b>6-syn</b>                                                    |                    |
| Empirical formula               | C <sub>24</sub> H <sub>20</sub> N <sub>2</sub> O <sub>6</sub> S |                    |
| Formula weight                  | 464.48                                                          |                    |
| Temperature                     | 293(2) K                                                        |                    |
| Wavelength                      | 0.71073 Å                                                       |                    |
| Crystal system                  | Monoclinic                                                      |                    |
| Space group                     | C2/c                                                            |                    |
| Unit cell dimensions            | a = 28.9553(14) Å                                               | α = 90°.           |
|                                 | b = 9.2913(4) Å                                                 | β = 129.8880(10)°. |
|                                 | c = 21.3693(18) Å                                               | γ = 90°.           |
| Volume                          | 4411.2(5) Å <sup>3</sup>                                        |                    |
| Z                               | 8                                                               |                    |
| Density (calculated)            | 1.399 Mg/m <sup>3</sup>                                         |                    |
| Absorption coefficient          | 0.191 mm <sup>-1</sup>                                          |                    |
| F(000)                          | 1936                                                            |                    |
| Crystal size                    | 0.200 x 0.180 x 0.170 mm <sup>3</sup>                           |                    |
| Theta range for data collection | 2.817 to 27.506°.                                               |                    |
| Index ranges                    | -37 ≤ h ≤ 37, -12 ≤ k ≤ 12, -27 ≤ l ≤ 27                        |                    |
| Reflections collected           | 47966                                                           |                    |
| Independent reflections         | 5050 [R(int) = 0.0561]                                          |                    |



|                                   |                                             |
|-----------------------------------|---------------------------------------------|
| Completeness to theta = 25.242°   | 99.8 %                                      |
| Max. and min. transmission        | 0.9682 and 0.9627                           |
| Refinement method                 | Full-matrix least-squares on F <sup>2</sup> |
| Data / restraints / parameters    | 5050 / 0 / 299                              |
| Goodness-of-fit on F <sup>2</sup> | 1.036                                       |
| Final R indices [I>2sigma(I)]     | R1 = 0.0541, wR2 = 0.1359                   |
| R indices (all data)              | R1 = 0.0946, wR2 = 0.1723                   |
| Extinction coefficient            | 0.0023(4)                                   |
| Largest diff. peak and hole       | 0.383 and -0.301 e.Å <sup>-3</sup>          |

Table 2. Atomic coordinates (x 10<sup>4</sup>) and equivalent isotropic displacement parameters (Å<sup>2</sup>x 10<sup>3</sup>) for Y. U(eq) is defined as one third of the trace of the orthogonalized U<sup>ij</sup> tensor.

|       | x       | y       | z        | U(eq)  |
|-------|---------|---------|----------|--------|
| C(1)  | -911(1) | 944(3)  | 7546(2)  | 56(1)  |
| C(2)  | -392(1) | 212(3)  | 7904(2)  | 72(1)  |
| C(3)  | 148(1)  | 929(3)  | 8448(2)  | 65(1)  |
| C(4)  | 162(1)  | 2355(3) | 8615(1)  | 50(1)  |
| C(5)  | -375(1) | 3034(3) | 8276(3)  | 100(1) |
| C(6)  | -919(1) | 2326(3) | 7738(2)  | 99(1)  |
| C(7)  | 1244(1) | 3665(4) | 11031(2) | 63(1)  |
| C(8)  | 656(1)  | 3222(4) | 10604(2) | 75(1)  |
| C(9)  | 540(2)  | 1787(5) | 10641(2) | 90(1)  |
| C(10) | 1011(2) | 821(5)  | 11089(2) | 96(1)  |
| C(11) | 1594(2) | 1282(5) | 11521(2) | 94(1)  |
| C(12) | 1719(1) | 2706(4) | 11499(2) | 78(1)  |
| C(13) | 1558(1) | 5295(3) | 9206(1)  | 51(1)  |
| C(14) | 2092(1) | 4531(3) | 9607(2)  | 63(1)  |
| C(15) | 2352(1) | 4334(4) | 9249(2)  | 76(1)  |
| C(16) | 2093(2) | 4903(4) | 8505(3)  | 86(1)  |
| C(17) | 1567(2) | 5661(4) | 8095(2)  | 87(1)  |
| C(18) | 1295(2) | 5849(3) | 8444(2)  | 69(1)  |
| C(19) | 1244(1) | 5512(3) | 9574(1)  | 46(1)  |
| C(20) | 1711(1) | 5581(3) | 10509(1) | 51(1)  |
| C(21) | 1992(1) | 7095(3) | 10669(2) | 65(1)  |
| C(22) | 1488(1) | 8064(3) | 9996(2)  | 72(1)  |
| C(23) | 996(1)  | 7056(3) | 9366(2)  | 59(1)  |

|       |          |         |          |        |
|-------|----------|---------|----------|--------|
| C(24) | 760(1)   | 3097(3) | 9169(1)  | 50(1)  |
| N(1)  | -1495(1) | 225(3)  | 6956(2)  | 73(1)  |
| N(2)  | 735(1)   | 4544(2) | 9203(1)  | 49(1)  |
| O(1)  | -1937(1) | 761(3)  | 6803(2)  | 101(1) |
| O(2)  | -1508(1) | -851(3) | 6637(2)  | 135(1) |
| O(3)  | 1234(1)  | 2439(2) | 9560(1)  | 68(1)  |
| O(4)  | 481(1)   | 7350(2) | 8798(1)  | 80(1)  |
| O(5)  | 1866(1)  | 5928(3) | 11839(1) | 93(1)  |
| O(6)  | 838(1)   | 6287(3) | 10538(1) | 80(1)  |
| S(1)  | 1395(1)  | 5494(1) | 11011(1) | 66(1)  |

Table 3. Bond lengths [ $\text{\AA}$ ] and angles [ $^\circ$ ] for Y.

|             |          |
|-------------|----------|
| C(1)-C(6)   | 1.352(4) |
| C(1)-C(2)   | 1.355(4) |
| C(1)-N(1)   | 1.470(3) |
| C(2)-C(3)   | 1.381(4) |
| C(3)-C(4)   | 1.366(4) |
| C(4)-C(5)   | 1.376(4) |
| C(4)-C(24)  | 1.499(3) |
| C(5)-C(6)   | 1.383(4) |
| C(7)-C(8)   | 1.382(4) |
| C(7)-C(12)  | 1.385(4) |
| C(7)-S(1)   | 1.761(3) |
| C(8)-C(9)   | 1.389(5) |
| C(9)-C(10)  | 1.380(5) |
| C(10)-C(11) | 1.376(5) |
| C(11)-C(12) | 1.380(5) |
| C(13)-C(18) | 1.381(4) |
| C(13)-C(14) | 1.387(4) |
| C(13)-C(19) | 1.551(3) |
| C(14)-C(15) | 1.388(4) |
| C(15)-C(16) | 1.357(5) |
| C(16)-C(17) | 1.368(5) |
| C(17)-C(18) | 1.401(5) |
| C(19)-N(2)  | 1.453(3) |
| C(19)-C(20) | 1.536(3) |

|             |          |
|-------------|----------|
| C(19)-C(23) | 1.537(4) |
| C(20)-C(21) | 1.550(4) |
| C(20)-S(1)  | 1.804(2) |
| C(21)-C(22) | 1.522(4) |
| C(22)-C(23) | 1.503(4) |
| C(23)-O(4)  | 1.204(3) |
| C(24)-O(3)  | 1.219(3) |
| C(24)-N(2)  | 1.351(3) |
| N(1)-O(2)   | 1.197(4) |
| N(1)-O(1)   | 1.207(3) |
| O(5)-S(1)   | 1.435(2) |
| O(6)-S(1)   | 1.440(2) |

|                   |          |
|-------------------|----------|
| C(6)-C(1)-C(2)    | 122.3(2) |
| C(6)-C(1)-N(1)    | 117.3(2) |
| C(2)-C(1)-N(1)    | 120.4(2) |
| C(1)-C(2)-C(3)    | 118.7(3) |
| C(4)-C(3)-C(2)    | 121.0(2) |
| C(3)-C(4)-C(5)    | 118.3(2) |
| C(3)-C(4)-C(24)   | 118.5(2) |
| C(5)-C(4)-C(24)   | 123.2(2) |
| C(4)-C(5)-C(6)    | 121.2(3) |
| C(1)-C(6)-C(5)    | 118.2(3) |
| C(8)-C(7)-C(12)   | 121.2(3) |
| C(8)-C(7)-S(1)    | 119.4(2) |
| C(12)-C(7)-S(1)   | 119.4(2) |
| C(7)-C(8)-C(9)    | 119.3(3) |
| C(10)-C(9)-C(8)   | 119.8(3) |
| C(11)-C(10)-C(9)  | 120.3(4) |
| C(10)-C(11)-C(12) | 120.8(4) |
| C(11)-C(12)-C(7)  | 118.7(3) |
| C(18)-C(13)-C(14) | 118.2(3) |
| C(18)-C(13)-C(19) | 119.4(2) |
| C(14)-C(13)-C(19) | 122.4(2) |
| C(13)-C(14)-C(15) | 120.7(3) |
| C(16)-C(15)-C(14) | 120.5(3) |
| C(15)-C(16)-C(17) | 120.2(3) |
| C(16)-C(17)-C(18) | 119.9(3) |

|                   |            |
|-------------------|------------|
| C(13)-C(18)-C(17) | 120.5(3)   |
| N(2)-C(19)-C(20)  | 118.3(2)   |
| N(2)-C(19)-C(23)  | 107.29(18) |
| C(20)-C(19)-C(23) | 101.25(19) |
| N(2)-C(19)-C(13)  | 111.23(18) |
| C(20)-C(19)-C(13) | 110.62(18) |
| C(23)-C(19)-C(13) | 107.0(2)   |
| C(19)-C(20)-C(21) | 102.9(2)   |
| C(19)-C(20)-S(1)  | 114.40(15) |
| C(21)-C(20)-S(1)  | 107.80(18) |
| C(22)-C(21)-C(20) | 106.2(2)   |
| C(23)-C(22)-C(21) | 105.2(2)   |
| O(4)-C(23)-C(22)  | 127.7(3)   |
| O(4)-C(23)-C(19)  | 123.4(2)   |
| C(22)-C(23)-C(19) | 108.9(2)   |
| O(3)-C(24)-N(2)   | 122.5(2)   |
| O(3)-C(24)-C(4)   | 122.3(2)   |
| N(2)-C(24)-C(4)   | 115.2(2)   |
| O(2)-N(1)-O(1)    | 123.4(3)   |
| O(2)-N(1)-C(1)    | 117.9(3)   |
| O(1)-N(1)-C(1)    | 118.7(3)   |
| C(24)-N(2)-C(19)  | 125.13(19) |
| O(5)-S(1)-O(6)    | 118.25(15) |
| O(5)-S(1)-C(7)    | 107.23(15) |
| O(6)-S(1)-C(7)    | 109.16(14) |
| O(5)-S(1)-C(20)   | 105.99(12) |
| O(6)-S(1)-C(20)   | 109.03(12) |
| C(7)-S(1)-C(20)   | 106.57(12) |

---

Symmetry transformations used to generate equivalent atoms:

Table 4. Anisotropic displacement parameters ( $\text{\AA}^2 \times 10^3$ ) for Y. The anisotropic displacement factor exponent takes the form:  $-2\pi^2 [ h^2 a^{*2} U^{11} + \dots + 2 h k a^* b^* U^{12} ]$

|      | $U^{11}$ | $U^{22}$ | $U^{33}$ | $U^{23}$ | $U^{13}$ | $U^{12}$ |
|------|----------|----------|----------|----------|----------|----------|
| C(1) | 42(1)    | 51(1)    | 55(1)    | -2(1)    | 22(1)    | -7(1)    |
| C(2) | 53(2)    | 50(2)    | 94(2)    | -12(1)   | 38(2)    | -3(1)    |

|       |        |        |        |        |       |        |
|-------|--------|--------|--------|--------|-------|--------|
| C(3)  | 43(1)  | 51(1)  | 83(2)  | -1(1)  | 33(1) | 5(1)   |
| C(4)  | 36(1)  | 50(1)  | 52(1)  | -1(1)  | 23(1) | -1(1)  |
| C(5)  | 40(2)  | 56(2)  | 144(3) | -29(2) | 32(2) | -3(1)  |
| C(6)  | 37(1)  | 58(2)  | 137(3) | -15(2) | 25(2) | 1(1)   |
| C(7)  | 50(1)  | 94(2)  | 49(1)  | 8(1)   | 34(1) | 2(1)   |
| C(8)  | 51(2)  | 104(2) | 70(2)  | 13(2)  | 38(2) | 1(2)   |
| C(9)  | 70(2)  | 112(3) | 91(2)  | 17(2)  | 53(2) | -6(2)  |
| C(10) | 97(3)  | 107(3) | 102(3) | 27(2)  | 72(2) | 1(2)   |
| C(11) | 84(2)  | 119(3) | 93(2)  | 41(2)  | 63(2) | 25(2)  |
| C(12) | 54(2)  | 115(3) | 66(2)  | 19(2)  | 39(2) | 10(2)  |
| C(13) | 49(1)  | 52(1)  | 51(1)  | -10(1) | 32(1) | -12(1) |
| C(14) | 47(1)  | 76(2)  | 68(2)  | -10(1) | 38(1) | -5(1)  |
| C(15) | 64(2)  | 89(2)  | 87(2)  | -29(2) | 54(2) | -21(2) |
| C(16) | 97(3)  | 94(2)  | 106(3) | -39(2) | 82(2) | -38(2) |
| C(17) | 125(3) | 82(2)  | 78(2)  | -15(2) | 76(2) | -26(2) |
| C(18) | 81(2)  | 66(2)  | 61(2)  | -2(1)  | 46(2) | -4(2)  |
| C(19) | 33(1)  | 51(1)  | 44(1)  | -2(1)  | 20(1) | -2(1)  |
| C(20) | 35(1)  | 68(2)  | 44(1)  | -4(1)  | 22(1) | -6(1)  |
| C(21) | 51(2)  | 74(2)  | 62(2)  | -20(1) | 33(1) | -17(1) |
| C(22) | 64(2)  | 57(2)  | 83(2)  | -17(2) | 42(2) | -11(1) |
| C(23) | 48(1)  | 55(2)  | 63(2)  | 0(1)   | 31(1) | 2(1)   |
| C(24) | 37(1)  | 54(1)  | 50(1)  | 1(1)   | 24(1) | -1(1)  |
| N(1)  | 53(1)  | 61(2)  | 73(2)  | -7(1)  | 25(1) | -13(1) |
| N(2)  | 32(1)  | 49(1)  | 50(1)  | -1(1)  | 20(1) | -2(1)  |
| O(1)  | 44(1)  | 101(2) | 110(2) | -19(2) | 27(1) | -13(1) |
| O(2)  | 82(2)  | 94(2)  | 157(3) | -66(2) | 43(2) | -27(2) |
| O(3)  | 39(1)  | 62(1)  | 80(1)  | 7(1)   | 28(1) | 6(1)   |
| O(4)  | 56(1)  | 63(1)  | 86(1)  | 7(1)   | 29(1) | 14(1)  |
| O(5)  | 82(2)  | 141(2) | 56(1)  | -28(1) | 44(1) | -27(2) |
| O(6)  | 64(1)  | 94(2)  | 97(2)  | -5(1)  | 58(1) | 9(1)   |
| S(1)  | 50(1)  | 94(1)  | 56(1)  | -9(1)  | 35(1) | -4(1)  |

Table 5. Hydrogen coordinates ( $\times 10^4$ ) and isotropic displacement parameters ( $\text{\AA}^2 \times 10^{-3}$ ) for Y.

|  | x | y | z | U(eq) |
|--|---|---|---|-------|
|--|---|---|---|-------|

|        |       |      |       |     |
|--------|-------|------|-------|-----|
| H(2)   | -395  | -864 | 7752  | 87  |
| H(3)   | 542   | 422  | 8696  | 78  |
| H(5)   | -379  | 3971 | 8496  | 120 |
| H(6)   | -1333 | 2829 | 7525  | 119 |
| H(8)   | 309   | 3921 | 10279 | 90  |
| H(9)   | 43    | 1438 | 10245 | 109 |
| H(10)  | 910   | -260 | 11132 | 115 |
| H(11)  | 1949  | 609  | 11928 | 112 |
| H(12)  | 2158  | 3098 | 11875 | 93  |
| H(14)  | 2304  | 4189 | 10194 | 75  |
| H(15)  | 2811  | 3823 | 9586  | 91  |
| H(16)  | 2323  | 4781 | 8277  | 103 |
| H(17)  | 1336  | 6041 | 7498  | 104 |
| H(18)  | 942   | 6333 | 8193  | 83  |
| H(20)  | 2035  | 4737 | 10818 | 61  |
| H(21A) | 2186  | 7468 | 11243 | 78  |
| H(21B) | 2297  | 6948 | 10617 | 78  |
| H(22A) | 1619  | 8676 | 9715  | 86  |
| H(22B) | 1291  | 8694 | 10197 | 86  |
| H(2N)  | 341   | 5040 | 8845  | 58  |

---
